# Supplementary material for: Multi-omics analysis reveals the molecular changes accompanying heavy-grazing-induced dwarfing of Stipa grandis
Source: Frontiers journal article supplement (doi:10.3389/fpls.2022.995074), 2022-10-04
Supplement: Data_Sheet_2.pdf [file Data_Sheet_2.pdf]

## Supplementary Figures

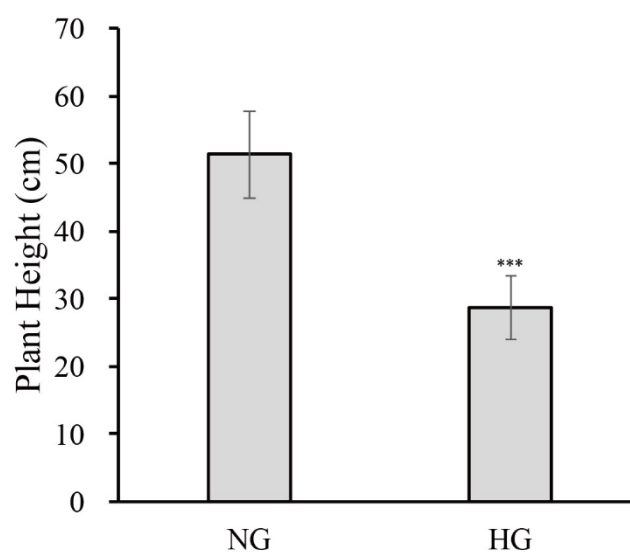

**Supplementary Figure S1.** Plant height of *Stipa grandis* under non-grazed (NG) and heavy-grazing (HG) treatments.

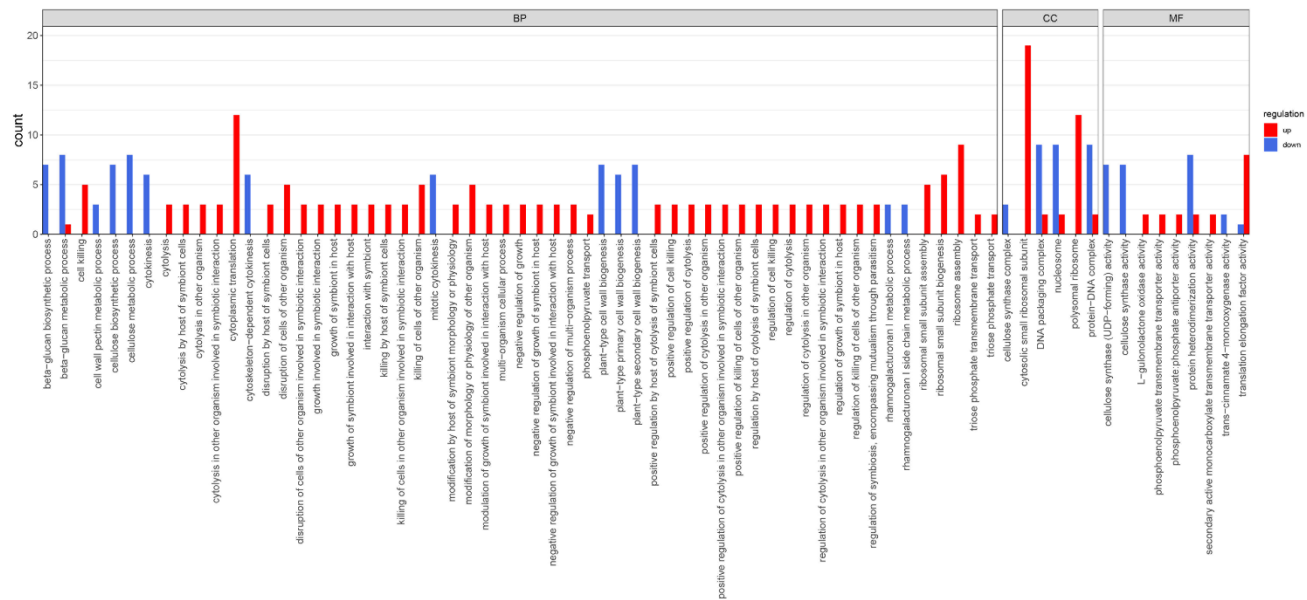

**Supplementary Figure S2.** Significantly enriched GO terms among differentially expressed proteins (DEPs).

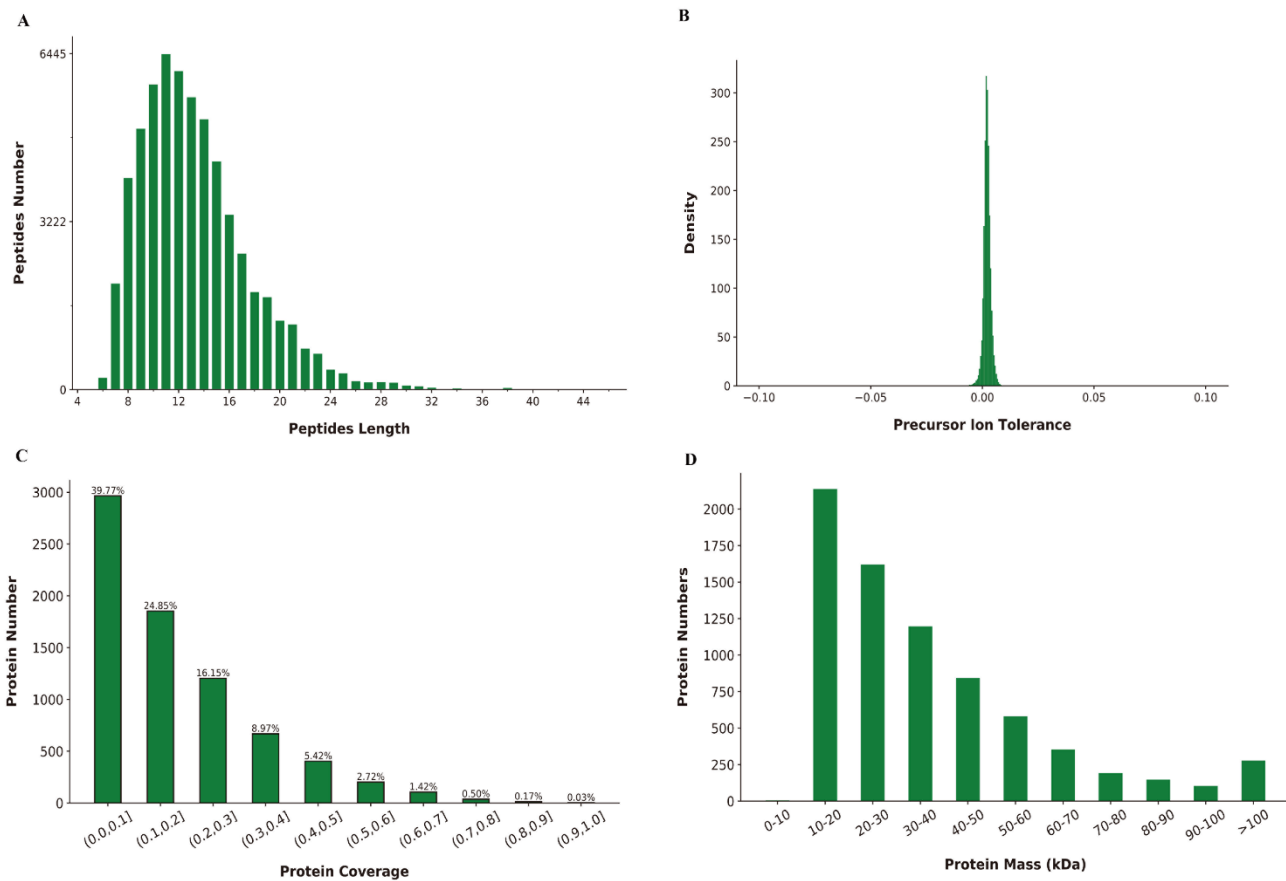

**Supplementary Figure S3.** Quality control of proteome profile. **(A)** Peptides length. **(B)** Precursor ion tolerance. **(C)** Protein coverage. **(D)** Protein mass.

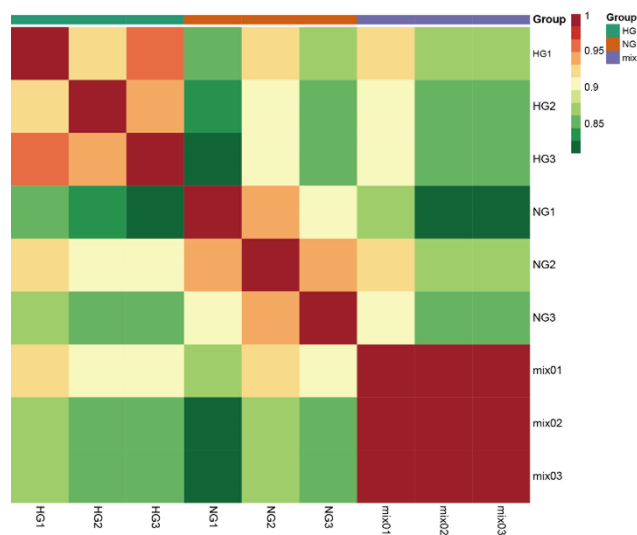

**Supplementary Figure S4.** Pearson’s correlation analysis of intragroup correlation among metabolites in each NG and HG.

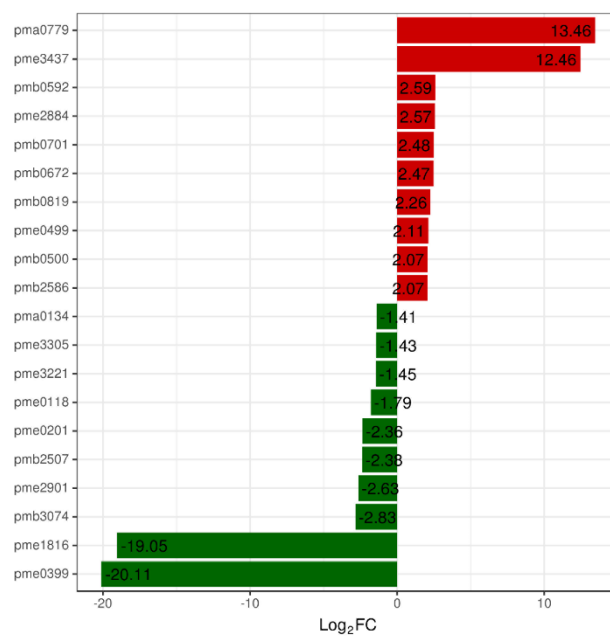

**Supplementary Figure S5.** The top 20 differentially accumulated metabolites (DAMs).

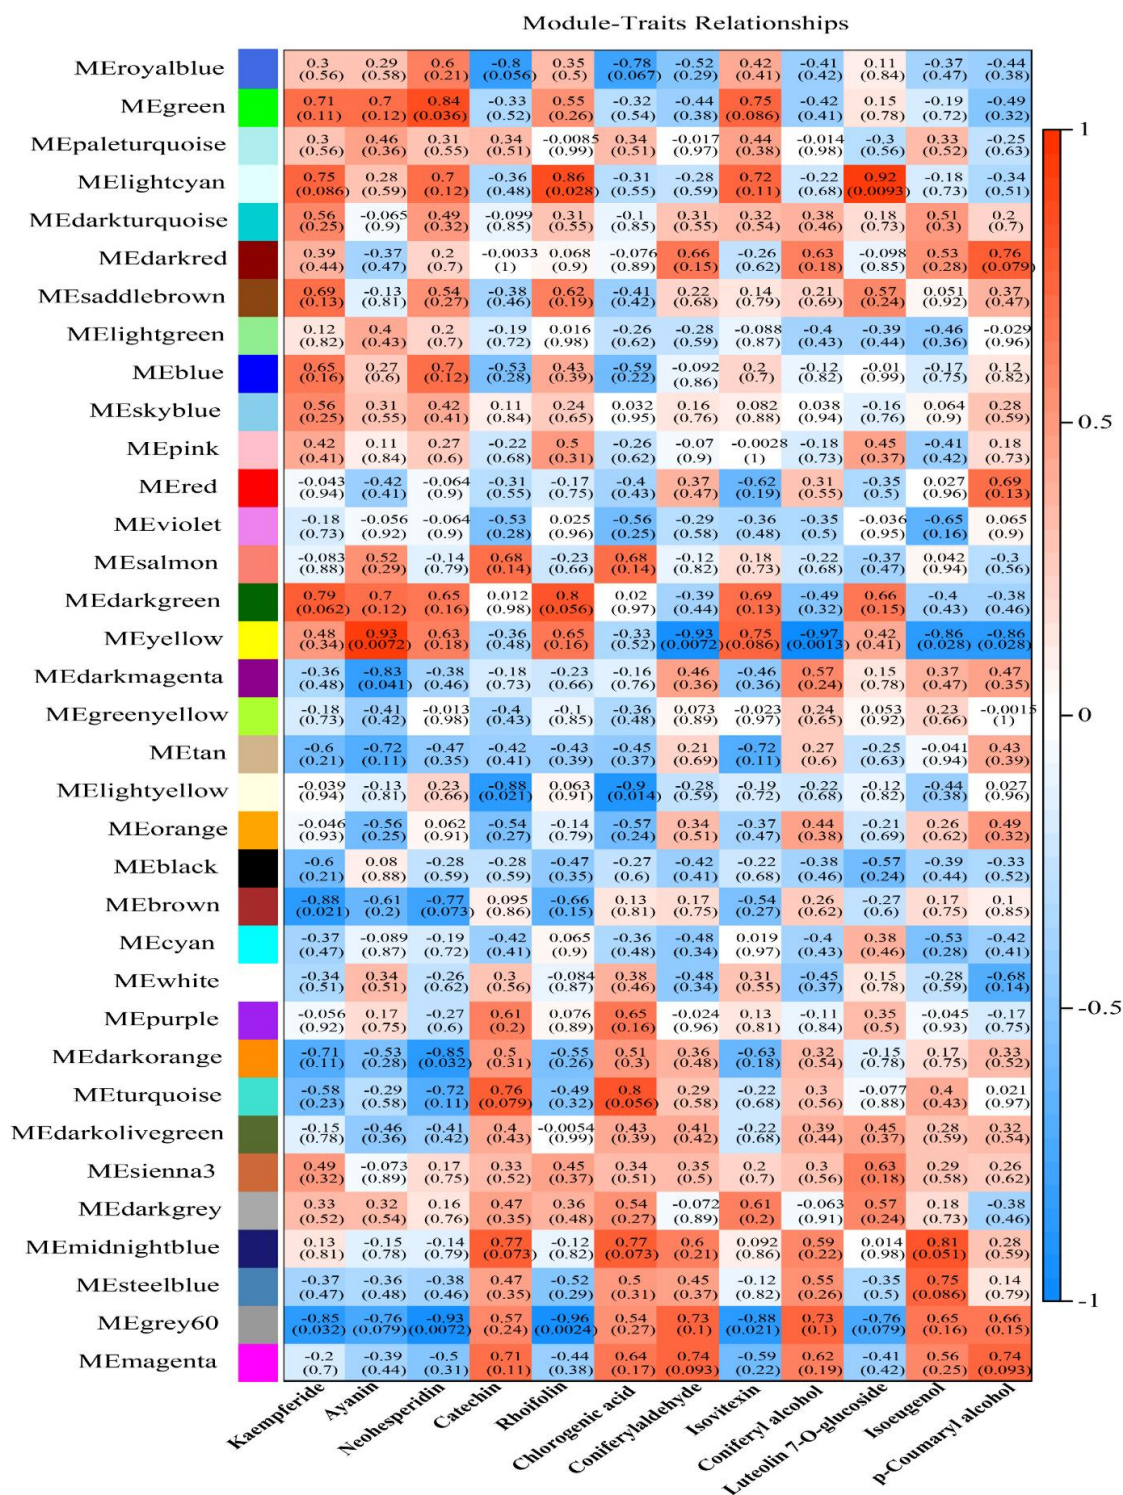

**Supplementary Figure S6.** Weighted gene co-expression network analysis (WGCNA) of co-expression genes with DAMs enriched in phenylpropanoid biosynthesis. Upper and lower values indicate the correlation coefficients and  $p$ -values, respectively.

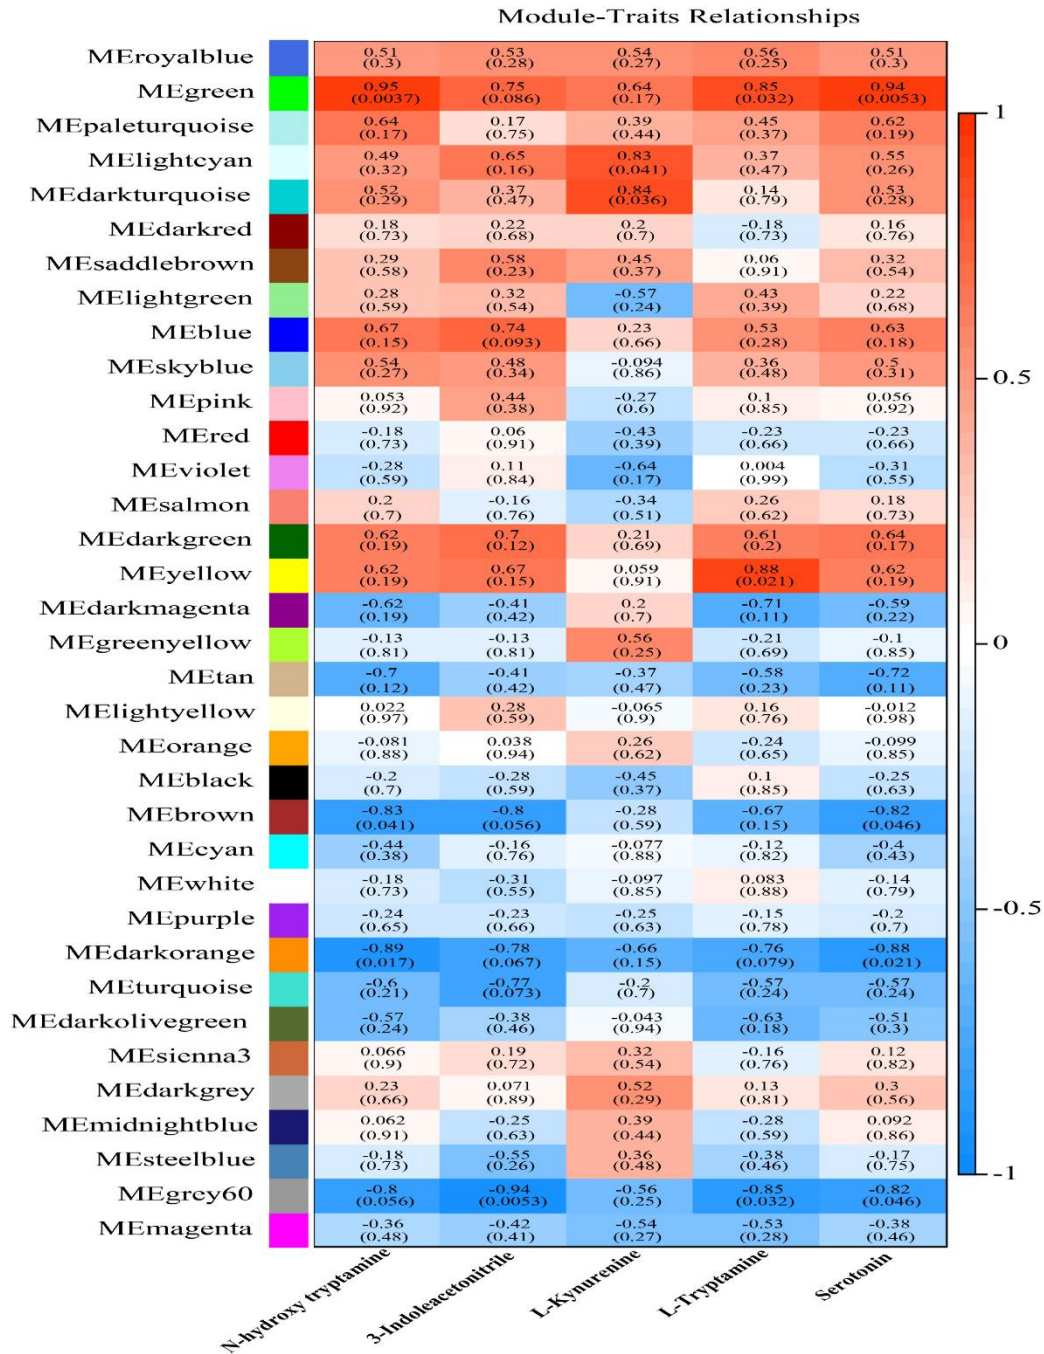

**Supplementary Figure S7.** WGCNA of co-expression genes with DAMs enriched in Trp metabolism. Upper and lower values indicate the correlation coefficients and *p*-values, respectively.
