# Supplementary material for: Multi-omics analysis reveals the molecular changes accompanying heavy-grazing-induced dwarfing of Stipa grandis
Source: Front Plant Sci. 2022 Oct 4;13:995074. doi: 10.3389/fpls.2022.995074 (PMC9673880; doi:10.3389/fpls.2022.995074)
Supplement: Supplementary file 2 [file Table_2.xlsx]

## Sheet: NG_VS_HG diff.annotation
Supplementary Table S2. Annotation of significantly differentially expressed genes (DEGs)
ID	HG	NG	log2FoldChange	pvalue	FDR	regulation	GO	KEGG	KOG	NR	SwissProt	TrEMBL
TRINITY_DN175520_c5_g5	356.401	8.22488	5.41	6.88e-33	4.79e-28	up	--	--	--	--	--	--
TRINITY_DN175241_c0_g2	2112.51	21.4534	6.63	4.25e-31	1.48e-26	up	--	--	--	--	--	--
TRINITY_DN183953_c0_g1	3847.95	0	14.41	1.72e-29	3.99e-25	up	--	--	--	--	--	--
TRINITY_DN201060_c2_g5	1389.87	3031.13	-1.12	4.4e-29	7.65e-25	down	--	--	--	--	--	--
TRINITY_DN174284_c1_g1	251.192	4.32092	5.84	2.1e-28	2.92e-24	up	--	--	--	--	--	--
TRINITY_DN185207_c0_g6	0	1510.25	-13	6.72e-27	7.8e-23	down	--	--	--	--	--	--
TRINITY_DN183953_c1_g1	1373.99	0	12.92	8.2e-22	8.15e-18	up	--	--	--	--	--	--
TRINITY_DN199191_c0_g2	499.166	19.6157	4.7	2.96e-21	2.57e-17	up	--	--	--	--	--	--
TRINITY_DN183782_c2_g2	251.886	42.3379	2.59	2.11e-20	1.63e-16	up	--	--	--	--	--	--
TRINITY_DN174846_c0_g1	0	936.689	-12.31	7.1e-19	4.94e-15	down	--	--	--	--	--	--
TRINITY_DN201644_c3_g1	0	678.378	-11.84	3.23e-18	2.04e-14	down	--	--	--	--	--	--
TRINITY_DN179402_c0_g2	0	258.011	-10.45	4.17e-18	2.42e-14	down	--	K01247: alkA; DNA-3-methyladenine glycosylase II [EC:3.2.2.21]	--	ref|XP_020156683.1|	--	A0A1D5SDD3_WHEAT, SubName: Full=Uncharacterized protein {ECO:0000313|EnsemblPlants:TRIAE_CS42_1BL_TGACv1_031919_AA0122830.1};
TRINITY_DN180836_c4_g4	396.202	0	11.13	9.53e-18	5.1e-14	up	GO:0009507,chloroplast; GO:0009941,chloroplast envelope; GO:0009534,chloroplast thylakoid; GO:0009535,chloroplast thylakoid membrane	K22547: HAC1; arsenate reductase [EC:1.20.4.1]	At4g27700	ref|XP_006660868.1|	STR14_ARATH, RecName: Full=Rhodanese-like domain-containing protein 14, chloroplastic; AltName: Full=Sulfurtransferase 14; Short=AtStr14; Flags: Precursor;	A0A0E0EU40_9ORYZ, SubName: Full=Uncharacterized protein {ECO:0000313|EnsemblPlants:OMERI09G12860.2};
TRINITY_DN170857_c1_g1	107.953	2.69095	5.27	2.04e-17	1.01e-13	up	--	--	--	--	--	--
TRINITY_DN174399_c2_g5	301.705	2.34999	6.94	6.55e-17	3.04e-13	up	--	--	--	--	--	--
TRINITY_DN186244_c4_g5	195.852	36.1757	2.42	1.07e-16	4.64e-13	up	--	--	--	--	--	--
TRINITY_DN190308_c3_g1	0	227.89	-10.27	1.22e-16	5e-13	down	--	K02218: CSNK1, CKI; casein kinase 1 [EC:2.7.11.1]	At5g27250	ref|XP_020396637.1|	--	A0A1D5V8W4_WHEAT, SubName: Full=Uncharacterized protein {ECO:0000313|EnsemblPlants:TRIAE_CS42_3AL_TGACv1_194626_AA0636940.1};
TRINITY_DN172566_c0_g1	376.253	69.754	2.43	2.52e-16	9.74e-13	up	--	--	--	--	--	--
TRINITY_DN179402_c0_g3	0	219.301	-10.21	5.49e-16	2.01e-12	down	--	--	--	--	--	--
TRINITY_DN189554_c2_g1	105.778	5.51505	4.35	6.46e-16	2.25e-12	up	GO:0016021,integral component of membrane; GO:0005635,nuclear envelope; GO:0005637,nuclear inner membrane; GO:0005654,nucleoplasm; GO:0043621,protein self-association	K20827: RPAP2; RNA polymerase II subunit B1 CTD phosphatase RPAP2 [EC:3.1.3.16]	At5g26770	ref|XP_003568987.1|	NEAP2_ARATH, RecName: Full=Nuclear envelope-associated protein 2 {ECO:0000303|PubMed:27630107}; Short=AtNEAP2 {ECO:0000303|PubMed:27630107};	I1HM73_BRADI, SubName: Full=Uncharacterized protein {ECO:0000313|EMBL:KQK07678.1, ECO:0000313|EnsemblPlants:BRADI2G36970.1};
TRINITY_DN175241_c0_g3	201.817	0	10.15	9.65e-16	3.2e-12	up	--	--	--	--	--	--
TRINITY_DN171298_c0_g4	236.92	9.64635	4.67	1.78e-15	5.41e-12	up	--	--	--	ref|XP_005647888.1|	--	I0YY75_COCSC, SubName: Full=Uncharacterized protein {ECO:0000313|EMBL:EIE23344.1};
TRINITY_DN181599_c3_g10	2846.74	544.449	2.39	1.79e-15	5.41e-12	up	--	--	--	--	--	--
TRINITY_DN163697_c0_g2	178.553	0	9.98	2.08e-15	6.03e-12	up	GO:0005840,ribosome; GO:0046872,metal ion binding; GO:0003735,structural constituent of ribosome; GO:0006412,translation	K02921: RP-L37Ae, RPL37A; large subunit ribosomal protein L37Ae	7296944	ref|XP_001696616.1|	RL37A_PSEMZ, RecName: Full=60S ribosomal protein L37a;	A8HY08_CHLRE, SubName: Full=Ribosomal protein L37a {ECO:0000313|EMBL:EDP08593.1};
TRINITY_DN177837_c0_g2	3.37254	169.368	-5.66	2.75e-15	7.65e-12	down	--	--	--	dbj|BAJ88389.1|	--	A0A287HLV0_HORVV, SubName: Full=Uncharacterized protein {ECO:0000313|EnsemblPlants:HORVU2Hr1G032370.2};
TRINITY_DN186196_c2_g5	0	408.309	-11.11	3.61e-15	9.67e-12	down	--	--	--	--	--	--
TRINITY_DN188610_c4_g1	129.596	17.9078	2.83	5.24e-15	1.35e-11	up	--	--	--	--	--	--
TRINITY_DN184624_c1_g2	797.199	20.3944	5.29	5.6e-15	1.39e-11	up	--	--	--	--	--	--
TRINITY_DN176991_c0_g2	1.01031	408.542	-8.67	8.67e-15	2.08e-11	down	--	--	--	--	--	--
TRINITY_DN177175_c2_g1	104.059	333.793	-1.68	1.12e-14	2.6e-11	down	--	--	--	--	--	--
TRINITY_DN179367_c0_g3	172.283	24.5207	2.8	1.64e-14	3.65e-11	up	--	--	--	--	--	--
TRINITY_DN200394_c0_g1	880.065	2400.76	-1.45	1.68e-14	3.65e-11	down	--	--	--	--	--	--
TRINITY_DN185160_c7_g2	0	153.243	-9.69	2.42e-14	5.11e-11	down	--	--	--	--	--	--
TRINITY_DN190308_c3_g5	0	164.237	-9.79	3.24e-14	6.62e-11	down	--	--	--	--	--	--
TRINITY_DN200658_c0_g2	154.2	0	9.77	4.83e-14	9.6e-11	up	--	--	--	--	--	--
TRINITY_DN194831_c4_g5	0	369.211	-10.96	6.95e-14	1.34e-10	down	--	--	--	--	--	--
TRINITY_DN179402_c0_g1	0	113.149	-9.26	8.47e-14	1.59e-10	down	--	K02218: CSNK1, CKI; casein kinase 1 [EC:2.7.11.1]	At5g41980	ref|XP_012701284.1|	--	A0A0Q3IK10_BRADI, SubName: Full=Uncharacterized protein {ECO:0000313|EMBL:KQK06139.1};
TRINITY_DN177057_c5_g2	190.803	0	10.07	1.13e-13	2.07e-10	up	--	--	--	--	--	--
TRINITY_DN181927_c2_g1	0	242.005	-10.35	1.53e-13	2.73e-10	down	--	--	--	--	--	--
TRINITY_DN201135_c2_g1	0	228.578	-10.27	7.43e-13	1.29e-09	down	--	--	--	--	--	--
TRINITY_DN183749_c3_g2	117.625	23.7444	2.32	1.12e-12	1.9e-09	up	--	--	--	--	--	--
TRINITY_DN177996_c3_g1	1248.58	330.413	1.92	1.39e-12	2.31e-09	up	--	--	--	--	--	--
TRINITY_DN181577_c4_g4	84.7356	0	8.9	1.77e-12	2.86e-09	up	--	--	--	--	--	--
TRINITY_DN184529_c1_g4	278.054	54.8271	2.34	2.32e-12	3.62e-09	up	--	K02429: fucP; MFS transporter, FHS family, L-fucose permease	--	ref|XP_001751264.1|	--	A9RB56_PHYPA, SubName: Full=Uncharacterized protein {ECO:0000313|EMBL:EDQ83581.1};
TRINITY_DN193898_c0_g2	0	97.0237	-9.03	2.38e-12	3.62e-09	down	--	--	--	--	--	--
TRINITY_DN169880_c0_g1	118.148	20.3513	2.52	2.39e-12	3.62e-09	up	--	--	--	--	--	--
TRINITY_DN184593_c2_g3	1.92357	418.504	-7.74	2.9e-12	4.29e-09	down	--	--	--	--	--	--
TRINITY_DN176008_c4_g1	834.614	231.333	1.85	3.09e-12	4.48e-09	up	--	--	--	--	--	--
TRINITY_DN202004_c4_g2	2189.5	907.532	1.27	3.18e-12	4.52e-09	up	--	--	--	--	--	--
TRINITY_DN187273_c0_g1	195.526	9.3996	4.41	4.91e-12	6.84e-09	up	--	--	--	--	--	--
TRINITY_DN180769_c3_g6	227.296	5.26899	5.42	5.98e-12	8.16e-09	up	--	--	--	gb|POF26420.1|	--	--
TRINITY_DN178638_c1_g4	0	76.1591	-8.69	6.75e-12	9.04e-09	down	GO:0016021,integral component of membrane; GO:0005886,plasma membrane; GO:0005524,ATP binding; GO:0004674,protein serine/threonine kinase activity; GO:0042742,defense response to bacterium; GO:0006468,protein phosphorylation	K04733: IRAK4; interleukin-1 receptor-associated kinase 4 [EC:2.7.11.1]	At4g23160_2	ref|XP_020148269.1|	CRK8_ARATH, RecName: Full=Cysteine-rich receptor-like protein kinase 8; Short=Cysteine-rich RLK8; EC=2.7.11.-; Flags: Precursor;	A0A1D6RXZ7_WHEAT, SubName: Full=Uncharacterized protein {ECO:0000313|EnsemblPlants:TRIAE_CS42_4BS_TGACv1_327817_AA1075070.3};
TRINITY_DN179155_c1_g1	515.317	143.357	1.84	7.84e-12	1.03e-08	up	--	--	--	--	--	--
TRINITY_DN182725_c1_g7	0	73.4707	-8.63	8.99e-12	1.16e-08	down	--	--	--	--	--	--
TRINITY_DN185960_c0_g1	10.3778	260.75	-4.66	9.15e-12	1.16e-08	down	GO:0016021,integral component of membrane; GO:0007338,single fertilization	--	--	gb|EEE67552.1|	EA1_MAIZE, RecName: Full=Protein EGG APPARATUS-1; AltName: Full=ZmEA1;	B9FYB5_ORYSJ, SubName: Full=Uncharacterized protein {ECO:0000313|EMBL:EEE67552.1};
TRINITY_DN170300_c1_g2	85.6538	12.4509	2.8	1.06e-11	1.32e-08	up	GO:0022625,cytosolic large ribosomal subunit; GO:0005886,plasma membrane; GO:0003729,mRNA binding; GO:0003735,structural constituent of ribosome; GO:0006412,translation	K02885: RP-L19e, RPL19; large subunit ribosomal protein L19e	At3g16780	gb|KZV47143.1|	RL192_ARATH, RecName: Full=60S ribosomal protein L19-2;	A0A1D1XS62_9ARAE, RecName: Full=Ribosomal protein L19 {ECO:0000256|RuleBase:RU000574};
TRINITY_DN199508_c0_g3	0	97.8415	-9.05	1.34e-11	1.64e-08	down	--	--	--	--	--	--
TRINITY_DN183874_c6_g1	1137.95	129.15	3.14	1.4e-11	1.68e-08	up	--	--	--	--	--	--
TRINITY_DN199948_c1_g1	255.831	122.931	1.06	1.71e-11	2.02e-08	up	GO:0031969,chloroplast membrane; GO:0016021,integral component of membrane; GO:0015121,phosphoenolpyruvate:phosphate antiporter activity; GO:0071917,triose-phosphate transmembrane transporter activity; GO:0008643,carbohydrate transport; GO:0015714,phosphoenolpyruvate transport; GO:0035436,triose phosphate transmembrane transport	K15283: SLC35E1; solute carrier family 35, member E1	At5g33320	ref|XP_003568839.1|	PPT3_ORYSJ, RecName: Full=Phosphoenolpyruvate/phosphate translocator 3, chloroplastic; Short=OsPPT3; Flags: Precursor;	A0A287EYR3_HORVV, SubName: Full=Predicted protein {ECO:0000313|EnsemblPlants:HORVU1Hr1G025390.15};
TRINITY_DN178557_c0_g3	149.22	34.0146	2.12	1.89e-11	2.2e-08	up	GO:0005737,cytoplasm; GO:0005525,GTP binding; GO:0003924,GTPase activity; GO:0003746,translation elongation factor activity	K03231: EEF1A; elongation factor 1-alpha	Hs20539489	dbj|BAJ90196.1|	EF1A_PYRYE, RecName: Full=Elongation factor 1-alpha; Short=EF-1-alpha;	F2D525_HORVV, RecName: Full=Elongation factor 1-alpha {ECO:0000256|RuleBase:RU000325};
TRINITY_DN184190_c2_g7	0	66.555	-8.49	2.28e-11	2.6e-08	down	--	--	--	--	--	--
TRINITY_DN196783_c0_g6	145.084	0	9.68	2.73e-11	3.03e-08	up	--	--	--	--	--	--
TRINITY_DN185996_c1_g3	245.616	38.4462	2.66	2.74e-11	3.03e-08	up	--	--	--	--	--	--
TRINITY_DN157970_c0_g1	63.2201	0	8.48	3.82e-11	4.15e-08	up	--	--	--	--	--	--
TRINITY_DN160583_c0_g2	53.3921	1.89492	4.83	4.25e-11	4.55e-08	up	--	--	--	--	--	--
TRINITY_DN140167_c0_g1	179.995	17.6617	3.37	5.68e-11	5.98e-08	up	--	--	--	--	--	--
TRINITY_DN176047_c0_g1	11.0722	125.69	-3.5	8.09e-11	8.4e-08	down	--	--	--	--	--	--
TRINITY_DN31516_c0_g1	73.661	0	8.7	9.75e-11	9.95e-08	up	--	--	--	--	--	--
TRINITY_DN179439_c3_g1	97.1023	20.5804	2.25	9.86e-11	9.95e-08	up	GO:0005840,ribosome; GO:0003735,structural constituent of ribosome; GO:0006412,translation	K02991: RP-S6e, RPS6; small subunit ribosomal protein S6e	SPAPB1E7.12	gb|POE46922.1|	RS6_ASPOF, RecName: Full=40S ribosomal protein S6;	A0A0D6QVF0_ARACU, RecName: Full=40S ribosomal protein S6 {ECO:0000256|PIRNR:PIRNR002129};
TRINITY_DN174583_c3_g1	53.2267	3.60039	3.84	1.04e-10	1.03e-07	up	--	--	--	gb|POE93244.1|	--	--
TRINITY_DN177642_c1_g1	70.3566	0	8.63	1.11e-10	1.08e-07	up	--	--	--	--	--	--
TRINITY_DN192394_c0_g5	75.3045	0	8.73	1.19e-10	1.15e-07	up	--	--	--	--	--	--
TRINITY_DN175339_c0_g1	165.142	28.9164	2.51	1.23e-10	1.17e-07	up	--	--	--	--	--	--
TRINITY_DN327126_c0_g1	0	68.5391	-8.54	1.39e-10	1.31e-07	down	--	--	--	--	--	--
TRINITY_DN189072_c2_g4	2108.5	4689.06	-1.15	1.41e-10	1.31e-07	down	--	--	--	--	--	--
TRINITY_DN186610_c2_g1	74.3015	15.8993	2.22	1.95e-10	1.78e-07	up	GO:0022626,cytosolic ribosome; GO:0022627,cytosolic small ribosomal subunit; GO:0003735,structural constituent of ribosome; GO:0000028,ribosomal small subunit assembly; GO:0006412,translation	K02962: RP-S17e, RPS17; small subunit ribosomal protein S17e	YML024w	dbj|BAK07272.1|	RS173_ARATH, RecName: Full=40S ribosomal protein S17-3;	F2EIV0_HORVV, SubName: Full=Predicted protein {ECO:0000313|EMBL:BAK07272.1};
TRINITY_DN175040_c5_g4	0	56.093	-8.24	2.19e-10	1.98e-07	down	--	--	--	--	--	--
TRINITY_DN190313_c0_g1	169.435	10.4805	4.03	2.24e-10	2e-07	up	--	--	--	--	--	--
TRINITY_DN191585_c2_g4	64.0248	0	8.5	2.61e-10	2.3e-07	up	GO:0005634,nucleus; GO:0003700,DNA binding transcription factor activity; GO:0046983,protein dimerization activity; GO:0000977,RNA polymerase II regulatory region sequence-specific DNA binding; GO:0045944,positive regulation of transcription by RNA polymerase II; GO:0006351,transcription, DNA-templated	K09264: K09264; MADS-box transcription factor, plant	At5g60910	gb|ABU87417.1|	AGL8_SOLCO, RecName: Full=Agamous-like MADS-box protein AGL8 homolog;	A0A0V0H919_SOLCH, SubName: Full=Putative agamous-like MADS-box protein AGL8-like {ECO:0000313|EMBL:JAP16352.1};
TRINITY_DN197876_c1_g2	0	80.3397	-8.77	2.78e-10	2.41e-07	down	--	--	--	--	--	--
TRINITY_DN302728_c0_g1	64.731	0	8.51	3.21e-10	2.76e-07	up	--	--	--	--	--	--
TRINITY_DN173068_c0_g1	0	69.118	-8.54	3.42e-10	2.9e-07	down	--	--	--	--	--	--
TRINITY_DN178440_c1_g9	62.1404	0	8.46	3.56e-10	2.95e-07	up	--	--	--	--	--	--
TRINITY_DN154052_c1_g1	71.4908	0	8.66	3.56e-10	2.95e-07	up	--	--	--	--	--	--
TRINITY_DN187385_c2_g1	139.934	23.5544	2.57	3.82e-10	3.13e-07	up	--	--	--	gb|POF22288.1|	--	A0A0D6RA89_ARACU, SubName: Full=Uncharacterized protein {ECO:0000313|EMBL:JAG98890.1};
TRINITY_DN191701_c4_g5	59.616	0	8.39	3.88e-10	3.14e-07	up	--	--	--	--	--	--
TRINITY_DN196148_c0_g7	58.2523	0	8.36	4.48e-10	3.58e-07	up	--	--	--	--	--	--
TRINITY_DN134911_c0_g1	75.1303	0	8.73	4.65e-10	3.68e-07	up	--	--	--	--	--	--
TRINITY_DN199974_c2_g5	93.4341	0	9.04	4.85e-10	3.79e-07	up	--	--	--	--	--	--
TRINITY_DN201233_c2_g3	50.3646	0	8.15	4.93e-10	3.81e-07	up	--	--	--	--	--	--
TRINITY_DN199813_c1_g3	64.603	161.552	-1.32	5.17e-10	3.9e-07	down	GO:0010330,cellulose synthase complex; GO:0009507,chloroplast; GO:0005794,Golgi apparatus; GO:0016021,integral component of membrane; GO:0005886,plasma membrane; GO:0016760,cellulose synthase (UDP-forming) activity; GO:0016759,cellulose synthase activity; GO:0046872,metal ion binding; GO:0030244,cellulose biosynthetic process; GO:0009833,plant-type primary cell wall biogenesis; GO:0009834,plant-t…	K10999: CESA; cellulose synthase A [EC:2.4.1.12]	At5g17420	gb|ONM55063.1|	CESA9_ORYSJ, RecName: Full=Cellulose synthase A catalytic subunit 9 [UDP-forming]; EC=2.4.1.12; AltName: Full=OsCesA9;	A0A1D6S6C4_WHEAT, RecName: Full=Cellulose synthase {ECO:0000256|RuleBase:RU361116}; EC=2.4.1.12 {ECO:0000256|RuleBase:RU361116};
TRINITY_DN200733_c2_g2	53.4369	0	8.24	5.2e-10	3.9e-07	up	--	--	--	--	--	--
TRINITY_DN181577_c4_g2	49.6818	0	8.13	5.24e-10	3.9e-07	up	--	--	--	--	--	--
TRINITY_DN183932_c0_g1	259.212	47.1682	2.46	5.27e-10	3.9e-07	up	--	--	--	--	--	--
TRINITY_DN178723_c1_g1	100.641	449.602	-2.16	5.59e-10	4.09e-07	down	--	K01322: PREP; prolyl oligopeptidase [EC:3.4.21.26]	At1g20380	ref|XP_003580320.2|	--	I1J0K0_BRADI, SubName: Full=Uncharacterized protein {ECO:0000313|EMBL:KQJ84036.1, ECO:0000313|EnsemblPlants:BRADI5G18277.1};
TRINITY_DN174785_c4_g1	380.61	67.0029	2.5	6.47e-10	4.69e-07	up	--	--	--	gb|POE72129.1|	--	A0A1D1Y0L1_9ARAE, SubName: Full=Uncharacterized protein {ECO:0000313|EMBL:JAT48180.1};
TRINITY_DN174929_c4_g2	52.8007	7.61776	2.77	7.76e-10	5.57e-07	up	--	--	--	gb|ACU18045.1|	--	C6T893_SOYBN, SubName: Full=Uncharacterized protein {ECO:0000313|EMBL:ACU18045.1};
TRINITY_DN188776_c0_g2	303.308	58.7235	2.37	7.93e-10	5.63e-07	up	--	--	--	--	--	--
TRINITY_DN202052_c8_g6	2.09704	83.0038	-5.34	8.64e-10	6.08e-07	down	--	--	--	--	--	--
TRINITY_DN181904_c0_g3	113.319	25.2802	2.17	1.01e-09	7e-07	up	GO:0016021,integral component of membrane; GO:0031965,nuclear membrane; GO:0005886,plasma membrane; GO:0015171,amino acid transmembrane transporter activity; GO:0015293,symporter activity; GO:0003333,amino acid transmembrane transport; GO:0015802,basic amino acid transport	--	At1g77380	ref|XP_020158855.1|	AAP3_ARATH, RecName: Full=Amino acid permease 3; AltName: Full=Amino acid transporter AAP3;	A0A287NW31_HORVV, SubName: Full=Uncharacterized protein {ECO:0000313|EnsemblPlants:HORVU4Hr1G043680.5};
TRINITY_DN177373_c3_g5	237.402	47.6574	2.32	1.1e-09	7.5e-07	up	GO:0005829,cytosol; GO:0005886,plasma membrane; GO:0003755,peptidyl-prolyl cis-trans isomerase activity; GO:0006457,protein folding	K09565: PPIF; peptidyl-prolyl isomerase F (cyclophilin D) [EC:5.2.1.8]	SPBC28F2.03	dbj|BAK00338.1|	CP19B_ARATH, RecName: Full=Peptidyl-prolyl cis-trans isomerase CYP19-2; Short=PPIase CYP19-2; EC=5.2.1.8; AltName: Full=Cyclophilin of 19 kDa 2; Short=Cyclophilin-2; AltName: Full=Rotamase cyclophilin-6;	F2DZ16_HORVV, RecName: Full=Peptidyl-prolyl cis-trans isomerase {ECO:0000256|RuleBase:RU363019}; Short=PPIase {ECO:0000256|RuleBase:RU363019}; EC=5.2.1.8 {ECO:0000256|RuleBase:RU363019};
TRINITY_DN197108_c0_g7	0	83.7673	-8.82	1.1e-09	7.5e-07	down	--	--	--	--	--	--
TRINITY_DN199809_c0_g6	78.7555	10.9719	2.83	1.33e-09	9.01e-07	up	--	--	--	--	--	--
TRINITY_DN175520_c5_g2	141.643	1.61128	6.46	1.44e-09	9.65e-07	up	--	--	--	--	--	--
TRINITY_DN199969_c0_g1	8.02366	112.558	-3.81	1.46e-09	9.66e-07	down	--	--	--	--	--	A0A0A9U6J4_ARUDO, SubName: Full=Uncharacterized protein {ECO:0000313|EMBL:JAF77432.1};
TRINITY_DN178295_c1_g2	0	75.9612	-8.68	1.53e-09	9.98e-07	down	--	--	--	--	--	--
TRINITY_DN196563_c1_g1	0	85.5097	-8.86	1.53e-09	9.98e-07	down	--	--	--	--	--	--
TRINITY_DN190908_c3_g9	86.3926	0.644512	7.09	1.56e-09	1.01e-06	up	--	--	--	--	--	--
TRINITY_DN160192_c1_g1	0	77.7574	-8.72	1.65e-09	1.05e-06	down	--	--	--	--	--	--
TRINITY_DN177551_c0_g1	631.882	38.3801	4.05	1.73e-09	1.1e-06	up	--	K17338: REEP1_2_3_4; receptor expression-enhancing protein 1/2/3/4	At2g44310	ref|XP_020184847.1|	--	A0A1D5ZTH8_WHEAT, SubName: Full=Uncharacterized protein {ECO:0000313|EnsemblPlants:TRIAE_CS42_5DL_TGACv1_434747_AA1441000.1};
TRINITY_DN195439_c1_g8	95.7352	1.97093	5.64	1.76e-09	1.1e-06	up	GO:0009507,chloroplast; GO:0009941,chloroplast envelope; GO:0009570,chloroplast stroma; GO:0005739,mitochondrion; GO:0009536,plastid; GO:0009579,thylakoid; GO:0005773,vacuole; GO:0019239,deaminase activity; GO:0009082,branched-chain amino acid biosynthetic process; GO:0009097,isoleucine biosynthetic process; GO:0046686,response to cadmium ion; GO:0009636,response to toxic substance	K09022: ridA, tdcF, RIDA; 2-iminobutanoate/2-iminopropanoate deaminase [EC:3.5.99.10]	At3g20390	ref|XP_020195833.1|	RIDA_ARATH, RecName: Full=Reactive Intermediate Deaminase A, chloroplastic {ECO:0000303|PubMed:25070638}; EC=3.5.99.10 {ECO:0000269|PubMed:25070638}; AltName: Full=2-iminobutanoate/2-iminopropanoate deaminase; Flags: Precursor;	A0A1D5TPL2_WHEAT, SubName: Full=Uncharacterized protein {ECO:0000313|EnsemblPlants:TRIAE_CS42_2AS_TGACv1_113799_AA0360750.1};
TRINITY_DN198854_c0_g6	6.20557	161.515	-4.69	1.78e-09	1.11e-06	down	--	--	--	--	--	--
TRINITY_DN198424_c3_g1	90.2481	0	8.99	2.07e-09	1.28e-06	up	--	--	--	--	--	--
TRINITY_DN201835_c2_g1	5187.15	2522.39	1.04	2.09e-09	1.28e-06	up	--	--	--	--	--	--
TRINITY_DN195065_c2_g1	80.0339	0	8.82	2.13e-09	1.29e-06	up	--	--	--	--	--	--
TRINITY_DN193317_c4_g4	0	60.8162	-8.36	2.18e-09	1.31e-06	down	--	--	--	--	--	--
TRINITY_DN191818_c0_g1	0	44.6844	-7.92	2.6e-09	1.55e-06	down	--	--	--	--	--	--
TRINITY_DN179666_c0_g4	0	62.8457	-8.41	2.63e-09	1.55e-06	down	--	K13457: RPM1, RPS3; disease resistance protein RPM1	--	gb|KQK08109.1|	--	I1HN50_BRADI, SubName: Full=Uncharacterized protein {ECO:0000313|EnsemblPlants:BRADI2G39670.1};
TRINITY_DN180254_c3_g5	47.043	0	8.05	2.74e-09	1.6e-06	up	--	--	--	--	--	--
TRINITY_DN179883_c7_g2	4.29956	114.733	-4.73	3.2e-09	1.86e-06	down	--	--	--	--	--	--
TRINITY_DN188861_c1_g1	44.9375	0	7.99	3.44e-09	1.98e-06	up	--	--	--	--	--	--
TRINITY_DN183663_c3_g5	72.9762	0	8.69	3.49e-09	1.99e-06	up	--	--	--	--	--	--
TRINITY_DN115089_c0_g1	54.5442	0	8.27	3.57e-09	2.02e-06	up	--	--	--	--	--	--
TRINITY_DN306418_c0_g1	46.2337	0	8.03	3.98e-09	2.23e-06	up	--	--	--	--	--	--
TRINITY_DN184499_c2_g1	47.041	0	8.05	4.2e-09	2.34e-06	up	--	--	--	--	--	--
TRINITY_DN190007_c2_g1	44.8374	0	7.98	4.71e-09	2.6e-06	up	--	--	--	--	--	--
TRINITY_DN197274_c1_g7	0	47.6377	-8.01	4.94e-09	2.69e-06	down	--	--	--	--	--	--
TRINITY_DN193484_c0_g1	39.7667	0	7.81	4.95e-09	2.69e-06	up	--	--	--	--	--	--
TRINITY_DN193634_c1_g2	63.1432	0	8.48	5.73e-09	3.09e-06	up	--	--	--	--	--	--
TRINITY_DN182689_c0_g5	16.5589	172.763	-3.38	6.28e-09	3.34e-06	down	--	--	--	--	--	--
TRINITY_DN196190_c0_g4	0	53.805	-8.18	6.29e-09	3.34e-06	down	--	--	--	--	--	--
TRINITY_DN169669_c0_g1	65.0973	1.97093	5.09	6.57e-09	3.45e-06	up	--	--	--	--	--	--
TRINITY_DN188500_c0_g1	151.718	22.873	2.73	6.6e-09	3.45e-06	up	GO:0009570,chloroplast stroma; GO:0004601,peroxidase activity; GO:0051920,peroxiredoxin activity; GO:0045454,cell redox homeostasis	K11187: PRDX5; peroxiredoxin 5, atypical 2-Cys peroxiredoxin [EC:1.11.1.15]	SPCC330.06c	gb|POF01222.1|	PR2E2_ORYSJ, RecName: Full=Peroxiredoxin-2E-2, chloroplastic; EC=1.11.1.15; AltName: Full=Peroxiredoxin IIE-2; AltName: Full=Thioredoxin peroxidase 2E-2; Flags: Precursor;	K8YR32_NANGC, SubName: Full=Peroxiredoxin 5, atypical 2-Cys peroxiredoxin {ECO:0000313|EMBL:EKU21135.1}; EC=1.11.1.15 {ECO:0000313|EMBL:EKU21135.1};
TRINITY_DN138601_c0_g1	0	43.3948	-7.87	6.74e-09	3.5e-06	down	GO:0009507,chloroplast; GO:0005829,cytosol; GO:0000788,nuclear nucleosome; GO:0005730,nucleolus; GO:0005886,plasma membrane; GO:0009506,plasmodesma; GO:0009579,thylakoid; GO:0005774,vacuolar membrane; GO:0003677,DNA binding; GO:0042393,histone binding; GO:0046982,protein heterodimerization activity; GO:0006334,nucleosome assembly; GO:0009414,response to water deprivation	K11254: H4; histone H4	Hs4504301	gb|ACG30677.1|	H4_SOYBN, RecName: Full=Histone H4;	M7ZMQ6_TRIUA, RecName: Full=Histone H4 {ECO:0000256|RuleBase:RU000528};
TRINITY_DN187271_c4_g3	55.1801	0.322256	7.32	7.5e-09	3.87e-06	up	--	--	--	--	--	--
TRINITY_DN192947_c4_g1	61.4535	0	8.44	7.56e-09	3.87e-06	up	--	--	--	--	--	--
TRINITY_DN179014_c7_g7	51.7129	0	8.19	7.77e-09	3.95e-06	up	--	--	--	gb|POF20118.1|	--	--
TRINITY_DN177996_c4_g2	208.009	46.4629	2.15	8.08e-09	4.07e-06	up	--	--	--	--	--	--
TRINITY_DN194485_c0_g2	42.2959	0	7.9	8.4e-09	4.21e-06	up	--	--	--	--	--	--
TRINITY_DN183241_c0_g1	119.387	22.9291	2.38	8.51e-09	4.23e-06	up	GO:0009507,chloroplast; GO:0008106,alcohol dehydrogenase (NADP+) activity; GO:0055114,oxidation-reduction process	K11147: DHRS4; dehydrogenase/reductase SDR family member 4 [EC:1.1.-.-]	SPAC4H3.08	gb|POF16350.1|	ADRC1_ARATH, RecName: Full=NADPH-dependent aldehyde reductase 1, chloroplastic {ECO:0000303|PubMed:21169366}; Short=AtChlADR1 {ECO:0000303|PubMed:21169366}; EC=1.1.1.- {ECO:0000269|PubMed:21169366}; AltName: Full=Glucose and ribitol dehydrogenase homolog 1; Flags: Precursor;	A0A0D6R2U4_ARACU, SubName: Full=Uncharacterized protein {ECO:0000313|EMBL:JAG97021.1};
TRINITY_DN194055_c1_g2	0	48.9627	-8.05	9.21e-09	4.55e-06	down	--	--	--	--	--	--
TRINITY_DN193640_c0_g2	0	188.514	-9.99	9.49e-09	4.65e-06	down	--	--	--	--	--	--
TRINITY_DN176363_c0_g6	138.596	12.6208	3.43	9.67e-09	4.71e-06	up	GO:0009507,chloroplast; GO:0009941,chloroplast envelope; GO:0009570,chloroplast stroma; GO:0005739,mitochondrion; GO:0009536,plastid; GO:0005774,vacuolar membrane; GO:0005524,ATP binding; GO:0042803,protein homodimerization activity; GO:0051082,unfolded protein binding; GO:0009704,de-etiolation; GO:0006457,protein folding; GO:0045037,protein import into chloroplast stroma; GO:0010157,response to …	K09487: HSP90B, TRA1; heat shock protein 90kDa beta	At2g04030	gb|ACN35195.1|	HS905_ARATH, RecName: Full=Heat shock protein 90-5, chloroplastic {ECO:0000305}; Short=AtHSP90.5 {ECO:0000305}; Short=AtHsp90-5 {ECO:0000303|PubMed:11599565}; AltName: Full=Heat shock protein 88-1 {ECO:0000305}; Short=Hsp88-1 {ECO:0000303|PubMed:11599565}; AltName: Full=Hsp90C {ECO:0000303|PubMed:23382192}; AltName: Full=Protein EMBRYO DEFECTIVE 1956 {ECO:0000303|PubMed:23382192}; AltName: Full=P…	C0PJ29_MAIZE, SubName: Full=Uncharacterized protein {ECO:0000313|EMBL:ACN35195.1};
TRINITY_DN180014_c1_g1	0	47.1523	-7.99	9.84e-09	4.73e-06	down	--	--	--	--	--	--
TRINITY_DN194537_c0_g6	4028.76	957.117	2.07	9.86e-09	4.73e-06	up	GO:0042973,glucan endo-1,3-beta-D-glucosidase activity; GO:0005975,carbohydrate metabolic process; GO:0006952,defense response	K19891: GN1_2_3; glucan endo-1,3-beta-glucosidase 1/2/3 [EC:3.2.1.39]	At3g57240	gb|ADG56569.1|	E13A_HORVU, RecName: Full=Glucan endo-1,3-beta-glucosidase GI; EC=3.2.1.39; AltName: Full=(1->3)-beta-glucan endohydrolase GI; AltName: Full=(1->3)-beta-glucanase isoenzyme GI; AltName: Full=Beta-1,3-endoglucanase GI;	D6N2Z5_9POAL, SubName: Full=Beta-1,3-glucanase {ECO:0000313|EMBL:ADG56569.1};
TRINITY_DN176303_c1_g2	78.0577	10.8214	2.88	1.01e-08	4.8e-06	up	GO:0005737,cytoplasm; GO:0005524,ATP binding; GO:0004356,glutamate-ammonia ligase activity; GO:0006542,glutamine biosynthetic process	K01915: glnA, GLUL; glutamine synthetase [EC:6.3.1.2]	YPR035w	ref|XP_020584530.1|	GLNA_PINSY, RecName: Full=Glutamine synthetase cytosolic isozyme; EC=6.3.1.2; AltName: Full=GS1; AltName: Full=Glutamate--ammonia ligase;	A0A1D1XF42_9ARAE, RecName: Full=Glutamine synthetase {ECO:0000256|RuleBase:RU004356}; EC=6.3.1.2 {ECO:0000256|RuleBase:RU004356};
TRINITY_DN188702_c0_g2	0.972109	84.8799	-6.41	1.03e-08	4.88e-06	down	--	--	--	--	--	--
TRINITY_DN198028_c2_g1	38.9349	112.32	-1.52	1.12e-08	5.26e-06	down	--	--	--	--	--	--
TRINITY_DN197882_c2_g2	0	50.6893	-8.1	1.19e-08	5.54e-06	down	--	--	--	--	--	--
TRINITY_DN176343_c0_g4	77.0272	14.515	2.39	1.24e-08	5.73e-06	up	GO:0022625,cytosolic large ribosomal subunit; GO:0005730,nucleolus; GO:0070180,large ribosomal subunit rRNA binding; GO:0003735,structural constituent of ribosome; GO:0006412,translation	K02894: RP-L23e, RPL23; large subunit ribosomal protein L23e	SPCC1322.11	ref|XP_005651156.1|	RL23_ARATH, RecName: Full=60S ribosomal protein L23; AltName: Full=Protein EMBRYO DEFECTIVE 2171;	I0Z7J3_COCSC, SubName: Full=Ribosomal protein L14b/L23e {ECO:0000313|EMBL:EIE26612.1};
TRINITY_DN196807_c2_g2	49.9172	0	8.14	1.26e-08	5.76e-06	up	--	--	--	--	--	--
TRINITY_DN191367_c1_g1	300.072	43.9445	2.76	1.26e-08	5.76e-06	up	--	--	--	--	--	--
TRINITY_DN183874_c5_g1	306.204	47.6023	2.7	1.38e-08	6.26e-06	up	--	--	--	--	--	--
TRINITY_DN178557_c0_g2	130.766	28.235	2.21	1.52e-08	6.81e-06	up	--	--	--	gb|ACU18045.1|	--	C6T893_SOYBN, SubName: Full=Uncharacterized protein {ECO:0000313|EMBL:ACU18045.1};
TRINITY_DN169799_c0_g1	59.3409	11.5783	2.36	1.54e-08	6.89e-06	up	GO:0005840,ribosome; GO:0003735,structural constituent of ribosome; GO:0006412,translation	K02915: RP-L34e, RPL34; large subunit ribosomal protein L34e	YIL052c	gb|POE99486.1|	RL34_PEA, RecName: Full=60S ribosomal protein L34;	A0A1D1ZE62_9ARAE, SubName: Full=60S ribosomal protein L34-B {ECO:0000313|EMBL:JAT65147.1};
TRINITY_DN186518_c3_g5	0.961786	121.384	-6.94	1.62e-08	7.16e-06	down	GO:0016021,integral component of membrane; GO:0016020,membrane; GO:0020037,heme binding; GO:0005506,iron ion binding; GO:0016709,oxidoreductase activity, acting on paired donors, with incorporation or reduction of molecular oxygen, NAD(P)H as one donor, and incorporation of one atom of oxygen; GO:0010154,fruit development; GO:0040008,regulation of growth; GO:0044550,secondary metabolite biosynthe…	K20619: CYP78A; cytochrome P450 family 78 subfamily A	At3g61880	ref|XP_003578487.1|	C78A9_ARATH, RecName: Full=Cytochrome P450 78A9; EC=1.14.-.-;	I1IS33_BRADI, SubName: Full=Uncharacterized protein {ECO:0000313|EMBL:KQJ91148.1, ECO:0000313|EnsemblPlants:BRADI4G35890.1};
TRINITY_DN185161_c1_g2	51.7033	149.977	-1.53	1.63e-08	7.16e-06	down	GO:0005576,extracellular region; GO:0016788,hydrolase activity, acting on ester bonds; GO:0016042,lipid catabolic process	K21026: AAE; acetylajmaline esterase [EC:3.1.1.80]	At5g45910	ref|XP_020148677.1|	GDL83_ARATH, RecName: Full=GDSL esterase/lipase At5g45910; EC=3.1.1.-; AltName: Full=Extracellular lipase At5g45910; Flags: Precursor;	A0A287L7J1_HORVV, SubName: Full=Predicted protein {ECO:0000313|EnsemblPlants:HORVU3Hr1G058610.7};
TRINITY_DN172499_c2_g2	0	36.819	-7.64	1.74e-08	7.64e-06	down	--	--	--	--	--	--
TRINITY_DN187765_c1_g7	0	59.4045	-8.33	1.76e-08	7.65e-06	down	--	--	--	--	--	--
TRINITY_DN343588_c0_g1	0	45.0085	-7.92	1.91e-08	8.24e-06	down	--	--	--	--	--	--
TRINITY_DN187920_c0_g1	0	142.822	-9.59	1.94e-08	8.32e-06	down	--	--	--	--	--	--
TRINITY_DN185263_c2_g2	70.861	2.27449	4.98	2.04e-08	8.71e-06	up	--	--	--	--	--	--
TRINITY_DN200022_c1_g1	0	41.2329	-7.8	2.05e-08	8.71e-06	down	--	--	--	--	--	--
TRINITY_DN199019_c0_g2	0	104.997	-9.15	2.09e-08	8.81e-06	down	--	--	--	--	--	--
TRINITY_DN200996_c0_g1	72.4572	0	8.68	2.5e-08	1.05e-05	up	--	--	--	--	--	--
TRINITY_DN178295_c1_g1	0	39.227	-7.73	2.55e-08	1.06e-05	down	--	--	--	--	--	--
TRINITY_DN182430_c4_g1	14.9954	99.1694	-2.72	2.83e-08	1.17e-05	down	GO:0000307,cyclin-dependent protein kinase holoenzyme complex; GO:0005737,cytoplasm; GO:0005634,nucleus; GO:0009524,phragmoplast; GO:0005819,spindle; GO:0005524,ATP binding; GO:0030332,cyclin binding; GO:0004693,cyclin-dependent protein serine/threonine kinase activity; GO:0008353,RNA polymerase II carboxy-terminal domain kinase activity; GO:0051301,cell division; GO:0000082,G1/S transition of mi…	K07760: CDK; cyclin-dependent kinase [EC:2.7.11.22]	At1g20930	ref|XP_003574763.1|	CKB21_ORYSJ, RecName: Full=Cyclin-dependent kinase B2-1; Short=CDKB2;1; Short=CDKB;2; EC=2.7.11.22; EC=2.7.11.23; AltName: Full=CDC2Os-3;	I1I8I8_BRADI, SubName: Full=Uncharacterized protein {ECO:0000313|EMBL:KQJ98955.1, ECO:0000313|EnsemblPlants:BRADI3G40200.1};
TRINITY_DN176692_c5_g1	104.445	404.623	-1.95	2.99e-08	1.23e-05	down	--	--	--	--	--	--
TRINITY_DN171887_c0_g2	33.2684	0	7.55	3e-08	1.23e-05	up	--	--	--	--	--	--
TRINITY_DN195679_c0_g2	0	81.5952	-8.78	3.06e-08	1.25e-05	down	--	--	--	--	--	--
TRINITY_DN157842_c0_g2	38.8087	1.62998	4.61	3.22e-08	1.3e-05	up	--	--	--	gb|POE56240.1|	--	--
TRINITY_DN161907_c0_g2	199.119	60.6197	1.71	3.69e-08	1.49e-05	up	--	--	--	--	--	--
TRINITY_DN175507_c1_g12	76.979	0	8.76	3.77e-08	1.51e-05	up	--	--	--	--	--	--
TRINITY_DN197468_c1_g3	0	38.8071	-7.72	3.79e-08	1.51e-05	down	--	--	--	--	--	--
TRINITY_DN199860_c1_g2	237.788	54.0248	2.14	3.83e-08	1.52e-05	up	--	--	--	--	--	--
TRINITY_DN191743_c0_g4	32.4328	0	7.52	3.92e-08	1.54e-05	up	--	--	--	--	--	--
TRINITY_DN188960_c1_g2	75.4215	9.4377	3.02	3.96e-08	1.55e-05	up	--	K07034: K07034; uncharacterized protein	YNR002c	gb|POE77659.1|	--	A0A176VV29_MARPO, SubName: Full=Uncharacterized protein {ECO:0000313|EMBL:OAE24668.1};
TRINITY_DN190326_c0_g2	58.5473	7.56148	2.99	4.12e-08	1.6e-05	up	--	K07034: K07034; uncharacterized protein	YNR002c	ref|XP_001760663.1|	--	A0A176VV81_MARPO, SubName: Full=Uncharacterized protein {ECO:0000313|EMBL:OAE24667.1};
TRINITY_DN181524_c1_g1	40.3341	1.38322	4.72	4.33e-08	1.67e-05	up	--	--	--	--	--	--
TRINITY_DN188571_c3_g1	0	46.5281	-7.97	4.34e-08	1.67e-05	down	--	K00784: rnz; ribonuclease Z [EC:3.1.26.11]	At4g19080	ref|XP_020169863.1|	--	A0A1D5ZRN1_WHEAT, SubName: Full=Uncharacterized protein {ECO:0000313|EnsemblPlants:TRIAE_CS42_5DL_TGACv1_434282_AA1433150.1};
TRINITY_DN183199_c6_g1	110.405	23.0819	2.26	4.66e-08	1.78e-05	up	GO:0005737,cytoplasm; GO:0005525,GTP binding; GO:0003924,GTPase activity; GO:0003746,translation elongation factor activity	K03231: EEF1A; elongation factor 1-alpha	YPR080w	dbj|BAJ90196.1|	EF1A_EUGGR, RecName: Full=Elongation factor 1-alpha; Short=EF-1-alpha;	F2D525_HORVV, RecName: Full=Elongation factor 1-alpha {ECO:0000256|RuleBase:RU000325};
TRINITY_DN201133_c2_g1	99.3958	0	9.13	4.94e-08	1.86e-05	up	--	--	--	--	--	--
TRINITY_DN47882_c0_g1	44.4481	0	7.97	4.95e-08	1.86e-05	up	--	--	--	--	--	--
TRINITY_DN201021_c2_g1	50.3886	0	8.15	5.02e-08	1.88e-05	up	--	--	--	--	--	--
TRINITY_DN195087_c1_g1	0	39.1333	-7.73	5.1e-08	1.9e-05	down	--	--	--	--	--	--
TRINITY_DN190313_c0_g2	99.8662	0	9.14	5.26e-08	1.95e-05	up	--	--	--	--	--	--
TRINITY_DN196102_c1_g3	61.3	12.9813	2.26	5.31e-08	1.96e-05	up	--	--	--	--	--	--
TRINITY_DN170635_c0_g4	0.320595	64.6982	-7.49	5.74e-08	2.1e-05	down	--	--	--	--	--	--
TRINITY_DN184164_c0_g1	0	116.834	-9.3	5.98e-08	2.18e-05	down	--	--	--	--	--	--
TRINITY_DN176639_c3_g1	60.6092	0	8.42	6.14e-08	2.23e-05	up	--	--	--	--	--	--
TRINITY_DN178970_c5_g2	0.320595	58.7893	-7.35	6.29e-08	2.27e-05	down	GO:0000786,nucleosome; GO:0005634,nucleus; GO:0003677,DNA binding; GO:0046982,protein heterodimerization activity	K11252: H2B; histone H2B	Hs4504259	ref|XP_006665103.1|	H2B_OLILU, RecName: Full=Histone H2B;	T1N5G8_TRIUA, RecName: Full=Histone H2B {ECO:0000256|RuleBase:RU000451};
TRINITY_DN187491_c1_g2	35.3143	0	7.64	6.38e-08	2.29e-05	up	--	--	--	--	--	--
TRINITY_DN199632_c0_g1	38.3193	0	7.76	6.45e-08	2.3e-05	up	--	--	--	--	--	--
TRINITY_DN155009_c0_g2	51.4961	0	8.18	6.47e-08	2.3e-05	up	--	--	--	--	--	--
TRINITY_DN201587_c4_g8	0	42.5207	-7.85	6.51e-08	2.3e-05	down	--	--	--	--	--	--
TRINITY_DN194701_c1_g4	0	55.7395	-8.24	6.7e-08	2.35e-05	down	--	--	--	--	--	--
TRINITY_DN173038_c0_g2	153.882	36.7996	2.06	7.41e-08	2.59e-05	up	GO:0022626,cytosolic ribosome; GO:0022627,cytosolic small ribosomal subunit; GO:0003735,structural constituent of ribosome	K02975: RP-S25e, RPS25; small subunit ribosomal protein S25e	7299415	ref|XP_002953072.1|	RS254_ARATH, RecName: Full=40S ribosomal protein S25-4;	D8U310_VOLCA, SubName: Full=Component of cytosolic 80S ribosome and 40S small subunit {ECO:0000313|EMBL:EFJ45994.1};
TRINITY_DN177469_c0_g1	41.8259	5.07834	3	7.44e-08	2.59e-05	up	--	--	--	--	--	--
TRINITY_DN190077_c2_g5	35.4572	1.97093	4.22	7.47e-08	2.59e-05	up	--	--	--	gb|POE76235.1|	--	--
TRINITY_DN183845_c0_g4	0	62.7732	-8.41	8.2e-08	2.81e-05	down	--	--	--	--	--	--
TRINITY_DN199317_c1_g2	0	32.1956	-7.44	8.23e-08	2.81e-05	down	--	--	--	--	--	--
TRINITY_DN197100_c5_g5	48.2326	0	8.09	8.25e-08	2.81e-05	up	GO:0009507,chloroplast; GO:0009941,chloroplast envelope; GO:0042644,chloroplast nucleoid; GO:0009534,chloroplast thylakoid; GO:0009535,chloroplast thylakoid membrane; GO:0016020,membrane; GO:0009295,nucleoid; GO:0009508,plastid chromosome; GO:0098572,stromal side of plastid thylakoid membrane; GO:0007623,circadian rhythm	--	At3g46780	ref|XP_003568660.1|	PTA16_ARATH, RecName: Full=Protein plastid transcriptionally active 16, chloroplastic {ECO:0000303|PubMed:16326926}; Short=pTAC16 {ECO:0000303|PubMed:16326926}; Flags: Precursor;	I1HKH5_BRADI, SubName: Full=Uncharacterized protein {ECO:0000313|EMBL:KQK06829.1, ECO:0000313|EnsemblPlants:BRADI2G30400.1};
TRINITY_DN201281_c1_g6	167.759	23.5009	2.85	8.29e-08	2.81e-05	up	--	--	--	--	--	--
TRINITY_DN174880_c0_g10	39.0854	1.87622	4.38	8.51e-08	2.88e-05	up	GO:0009507,chloroplast; GO:0008106,alcohol dehydrogenase (NADP+) activity; GO:0055114,oxidation-reduction process	K08081: TR1; tropinone reductase I [EC:1.1.1.206]	SPAC4H3.08	gb|POF16350.1|	ADRC1_ARATH, RecName: Full=NADPH-dependent aldehyde reductase 1, chloroplastic {ECO:0000303|PubMed:21169366}; Short=AtChlADR1 {ECO:0000303|PubMed:21169366}; EC=1.1.1.- {ECO:0000269|PubMed:21169366}; AltName: Full=Glucose and ribitol dehydrogenase homolog 1; Flags: Precursor;	A0A0D6R2U4_ARACU, SubName: Full=Uncharacterized protein {ECO:0000313|EMBL:JAG97021.1};
TRINITY_DN182410_c0_g1	379.276	81.6764	2.21	8.59e-08	2.89e-05	up	GO:0050832,defense response to fungus; GO:0031640,killing of cells of other organism; GO:0044130,negative regulation of growth of symbiont in host; GO:0051841,positive regulation by host of cytolysis of symbiont cells	K04733: IRAK4; interleukin-1 receptor-associated kinase 4 [EC:2.7.11.1]	At4g11650	ref|XP_003559612.2|	ZEAM_MAIZE, RecName: Full=Zeamatin; Flags: Precursor;	I1GPS8_BRADI, SubName: Full=Uncharacterized protein {ECO:0000313|EMBL:KQK13877.1, ECO:0000313|EnsemblPlants:BRADI1G13060.1};
TRINITY_DN67607_c0_g1	0	32.4252	-7.45	8.73e-08	2.91e-05	down	--	--	--	--	--	--
TRINITY_DN170949_c0_g2	0	133.032	-9.49	9.3e-08	3.08e-05	down	--	--	--	--	--	--
TRINITY_DN177996_c4_g1	198.544	45.4002	2.12	9.35e-08	3.08e-05	up	--	--	--	--	--	--
TRINITY_DN209758_c0_g1	37.6017	0	7.73	9.9e-08	3.25e-05	up	--	--	--	--	--	--
TRINITY_DN176763_c0_g2	43.1312	0.322256	6.96	1e-07	3.28e-05	up	--	--	--	gb|POE56400.1|	--	--
TRINITY_DN178108_c2_g9	42.8744	0.568493	6.11	1.01e-07	3.29e-05	up	--	--	YKL163w	gb|POE65938.1|	--	A0A0D6QVZ1_ARACU, SubName: Full=Uncharacterized protein {ECO:0000313|EMBL:JAG94709.1};
TRINITY_DN187371_c1_g2	51.7141	0	8.19	1.03e-07	3.33e-05	up	--	--	YFL014w	gb|POE66144.1|	--	A0A0D6R409_ARACU, SubName: Full=Uncharacterized protein {ECO:0000313|EMBL:JAG97441.1};
TRINITY_DN185207_c0_g1	0	53.3339	-8.17	1.09e-07	3.51e-05	down	--	--	--	--	--	--
TRINITY_DN188785_c0_g1	0.644631	55.0474	-6.37	1.11e-07	3.53e-05	down	--	--	--	--	--	--
TRINITY_DN177186_c2_g1	78.076	0	8.78	1.11e-07	3.53e-05	up	GO:0016021,integral component of membrane; GO:0005743,mitochondrial inner membrane; GO:0005471,ATP:ADP antiporter activity; GO:0046902,regulation of mitochondrial membrane permeability; GO:0009409,response to cold; GO:0009651,response to salt stress	K05863: SLC25A4S, ANT; solute carrier family 25 (mitochondrial adenine nucleotide translocator), member 4/5/6/31	At3g08580	gb|AFK40369.1|	ADT_ORYSJ, RecName: Full=ADP,ATP carrier protein, mitochondrial; AltName: Full=ADP/ATP translocase; AltName: Full=Adenine nucleotide translocator; Short=ANT; Flags: Precursor;	I3SJC7_LOTJA, SubName: Full=Uncharacterized protein {ECO:0000313|EMBL:AFK40369.1};
TRINITY_DN172131_c2_g9	28.792	0	7.34	1.13e-07	3.57e-05	up	--	--	--	--	--	--
TRINITY_DN159092_c0_g1	162.214	28.9569	2.5	1.17e-07	3.68e-05	up	--	--	--	--	--	--
TRINITY_DN190977_c1_g7	79.0821	0	8.8	1.18e-07	3.7e-05	up	--	--	--	--	--	--
TRINITY_DN172209_c3_g8	47.0212	8.01604	2.54	1.23e-07	3.84e-05	up	--	--	--	--	--	--
TRINITY_DN197984_c0_g3	28.8718	0	7.35	1.25e-07	3.87e-05	up	--	--	--	--	--	--
TRINITY_DN201349_c2_g1	57.3269	0	8.34	1.25e-07	3.87e-05	up	--	--	--	--	--	--
TRINITY_DN160918_c1_g1	37.0545	0	7.71	1.32e-07	4.07e-05	up	--	--	--	--	--	--
TRINITY_DN181199_c2_g2	0	68.0624	-8.52	1.36e-07	4.18e-05	down	--	--	--	--	--	--
TRINITY_DN179088_c1_g1	0	36.1348	-7.61	1.39e-07	4.23e-05	down	--	--	--	--	--	--
TRINITY_DN111074_c0_g1	0	37.1766	-7.65	1.39e-07	4.23e-05	down	GO:0005840,ribosome; GO:0046872,metal ion binding; GO:0003735,structural constituent of ribosome; GO:0006412,translation	K02921: RP-L37Ae, RPL37A; large subunit ribosomal protein L37Ae	7296944	ref|XP_001696616.1|	RL37A_PSEMZ, RecName: Full=60S ribosomal protein L37a;	A8HY08_CHLRE, SubName: Full=Ribosomal protein L37a {ECO:0000313|EMBL:EDP08593.1};
TRINITY_DN176991_c0_g4	0	62.6398	-8.4	1.47e-07	4.45e-05	down	--	--	--	--	--	--
TRINITY_DN190179_c0_g3	42.0995	0	7.89	1.57e-07	4.72e-05	up	--	--	--	--	--	--
TRINITY_DN305360_c0_g1	42.0995	0	7.89	1.57e-07	4.72e-05	up	--	--	--	--	--	--
TRINITY_DN199121_c1_g4	34.678	0	7.61	1.63e-07	4.88e-05	up	--	--	--	--	--	--
TRINITY_DN130892_c0_g1	28.5444	0	7.33	1.73e-07	5.13e-05	up	--	--	--	--	--	--
TRINITY_DN234814_c0_g1	28.5444	0	7.33	1.73e-07	5.13e-05	up	--	--	--	--	--	--
TRINITY_DN186932_c1_g2	0.320595	64.7196	-7.49	1.74e-07	5.13e-05	down	GO:0005886,plasma membrane; GO:0043531,ADP binding; GO:0005524,ATP binding; GO:0009626,plant-type hypersensitive response; GO:0007165,signal transduction	K19613: SHOC2, SUR8; leucine-rich repeat protein SHOC2	At3g14470	gb|KQJ87265.2|	R13L1_ARATH, RecName: Full=Putative disease resistance RPP13-like protein 1;	A0A0Q3EHQ0_BRADI, SubName: Full=Uncharacterized protein {ECO:0000313|EMBL:KQJ87262.1};
TRINITY_DN329074_c0_g1	31.6457	0	7.48	1.78e-07	5.23e-05	up	--	--	--	--	--	--
TRINITY_DN180975_c7_g4	49.3581	1.06149	5.66	1.81e-07	5.29e-05	up	--	--	YKL163w	gb|POE65938.1|	--	A0A0D6QVZ1_ARACU, SubName: Full=Uncharacterized protein {ECO:0000313|EMBL:JAG94709.1};
TRINITY_DN174426_c1_g1	0	53.804	-8.18	1.84e-07	5.35e-05	down	--	--	--	--	--	--
TRINITY_DN177507_c1_g4	36.4064	0	7.68	1.88e-07	5.44e-05	up	--	--	--	--	--	--
TRINITY_DN173363_c0_g2	82.8291	14.4211	2.55	1.9e-07	5.49e-05	up	--	--	--	--	--	--
TRINITY_DN123716_c0_g1	34.9394	0	7.62	2e-07	5.7e-05	up	--	--	--	--	--	--
TRINITY_DN187517_c1_g1	0	613.434	-11.7	2e-07	5.7e-05	down	--	--	--	ref|XP_019253377.1|	--	A0A1J6I227_NICAT, SubName: Full=Uncharacterized protein {ECO:0000313|EMBL:OIS98585.1};
TRINITY_DN194260_c6_g2	46.7343	0	8.04	2.07e-07	5.86e-05	up	--	--	--	--	--	--
TRINITY_DN137114_c0_g1	35.6258	0	7.65	2.07e-07	5.86e-05	up	--	--	--	--	--	--
TRINITY_DN175721_c3_g4	188.991	1217.32	-2.69	2.12e-07	5.97e-05	down	--	--	--	--	--	--
TRINITY_DN140082_c0_g1	58.9821	0	8.38	2.14e-07	6.01e-05	up	--	--	--	--	--	--
TRINITY_DN183350_c0_g4	0	45.3029	-7.94	2.19e-07	6.12e-05	down	--	--	--	--	--	--
TRINITY_DN183126_c2_g1	227.123	47.3133	2.25	2.28e-07	6.34e-05	up	GO:0016021,integral component of membrane; GO:0020037,heme binding; GO:0036191,indolin-2-one monooxygenase activity; GO:0005506,iron ion binding	K00512: CYP17A; steroid 17alpha-monooxygenase / 17alpha-hydroxyprogesterone deacetylase [EC:1.14.14.19 1.14.14.32]	At1g13080	ref|XP_020175699.1|	C71C2_MAIZE, RecName: Full=indolin-2-one monooxygenase; EC=1.14.13.138; AltName: Full=Cytochrome P450 71C2; AltName: Full=Protein benzoxazineless 3;	A0A1D5WSF5_WHEAT, SubName: Full=Uncharacterized protein {ECO:0000313|EnsemblPlants:TRIAE_CS42_3DS_TGACv1_271997_AA0912700.1};
TRINITY_DN198351_c1_g2	84.7006	13.2838	2.66	2.34e-07	6.49e-05	up	--	--	--	--	--	--
TRINITY_DN200506_c1_g5	222.101	35.3445	2.66	2.38e-07	6.57e-05	up	--	--	--	--	--	--
TRINITY_DN181836_c0_g5	0	82.3677	-8.8	2.39e-07	6.58e-05	down	--	--	--	--	--	--
TRINITY_DN192385_c0_g2	0	53.6863	-8.18	2.44e-07	6.67e-05	down	--	--	--	--	--	--
TRINITY_DN184681_c1_g3	0	58.3172	-8.3	2.44e-07	6.67e-05	down	--	--	--	--	--	--
TRINITY_DN116538_c0_g1	41.2902	1.213	5.05	2.49e-07	6.78e-05	up	--	--	SPBC21C3.19	gb|POE66087.1|	--	A0A1D1ZBD3_9ARAE, SubName: Full=SDO1-like protein C21C3.19 {ECO:0000313|EMBL:JAT64181.1};
TRINITY_DN195698_c0_g2	80.9258	9.22834	3.14	2.51e-07	6.79e-05	up	--	K08145: SLC2A8, GLUT8; MFS transporter, SP family, solute carrier family 2 (facilitated glucose transporter), member 8	SPBC4B4.08	gb|POF16337.1|	--	F2EHD2_HORVV, SubName: Full=Predicted protein {ECO:0000313|EMBL:BAK06754.1};
TRINITY_DN222229_c0_g1	27.5375	0	7.28	2.52e-07	6.8e-05	up	--	--	--	--	--	--
TRINITY_DN173136_c3_g1	35.3589	0	7.64	2.66e-07	7.15e-05	up	--	--	--	--	--	--
TRINITY_DN140303_c0_g1	38.8034	0	7.78	2.74e-07	7.31e-05	up	--	--	--	--	--	--
TRINITY_DN192890_c0_g1	48.4946	5.74259	3.13	2.75e-07	7.31e-05	up	--	--	--	ref|XP_011396232.1|	--	A0A1D1ZTR7_AUXPR, SubName: Full=Uncharacterized protein {ECO:0000313|EMBL:JAT70289.1};
TRINITY_DN186238_c0_g2	72.7512	11.37	2.7	2.75e-07	7.31e-05	up	--	--	--	--	--	--
TRINITY_DN138503_c0_g1	26.9032	0	7.25	2.77e-07	7.33e-05	up	--	--	--	--	--	--
TRINITY_DN180098_c0_g2	76.4845	0	8.75	2.78e-07	7.33e-05	up	--	--	--	--	--	--
TRINITY_DN181483_c0_g2	16.2938	145.268	-3.16	2.93e-07	7.69e-05	down	--	--	--	--	--	--
TRINITY_DN6088_c0_g1	59.3619	4.32092	3.76	2.96e-07	7.73e-05	up	--	--	--	--	--	--
TRINITY_DN179637_c0_g4	45.2769	5.49583	3.07	3.03e-07	7.9e-05	up	GO:0009507,chloroplast; GO:0046872,metal ion binding; GO:0004784,superoxide dismutase activity	K04565: SOD1; superoxide dismutase, Cu-Zn family [EC:1.15.1.1]	YJR104c	gb|POF22227.1|	SODCP_PETHY, RecName: Full=Superoxide dismutase [Cu-Zn], chloroplastic; EC=1.15.1.1; Flags: Precursor;	A0A1Y1II22_KLENI, RecName: Full=Superoxide dismutase [Cu-Zn] {ECO:0000256|RuleBase:RU000393}; EC=1.15.1.1 {ECO:0000256|RuleBase:RU000393};
TRINITY_DN191424_c1_g1	29.662	0	7.39	3.12e-07	8.11e-05	up	--	--	--	--	--	--
TRINITY_DN171465_c1_g5	0	33.8991	-7.52	3.28e-07	8.49e-05	down	--	--	--	--	--	--
TRINITY_DN192692_c0_g1	0	28.3117	-7.26	3.32e-07	8.5e-05	down	--	--	--	--	--	--
TRINITY_DN185977_c2_g8	29.9109	0	7.4	3.33e-07	8.5e-05	up	--	--	--	--	--	--
TRINITY_DN176341_c5_g6	40.4912	2.52021	3.9	3.33e-07	8.5e-05	up	--	--	--	--	--	--
TRINITY_DN187564_c0_g6	74.0656	1.28902	5.85	3.33e-07	8.5e-05	up	--	--	--	gb|POE72093.1|	--	--
TRINITY_DN193854_c1_g3	3.5854	80.8761	-4.48	3.36e-07	8.53e-05	down	--	--	--	--	--	--
TRINITY_DN195326_c0_g5	38.0269	191.828	-2.33	3.39e-07	8.58e-05	down	--	--	--	--	--	--
TRINITY_DN172225_c0_g1	26.6533	0	7.23	3.4e-07	8.58e-05	up	--	--	--	--	--	--
TRINITY_DN179883_c7_g1	0.64119	94.3253	-7.15	3.59e-07	9.02e-05	down	--	--	--	--	--	--
TRINITY_DN200133_c1_g1	40.8237	5.9883	2.78	3.6e-07	9.02e-05	up	--	K03235: EF3, TEF3; elongation factor 3	SPCC417.08_2	dbj|BAK06597.1|	--	F2EGX5_HORVV, SubName: Full=Predicted protein {ECO:0000313|EMBL:BAK06597.1}; Flags: Fragment;
TRINITY_DN175992_c2_g1	95.365	24.5227	1.97	3.67e-07	9.17e-05	up	GO:0005840,ribosome; GO:0003735,structural constituent of ribosome; GO:0006412,translation	K02889: RP-L21e, RPL21; large subunit ribosomal protein L21e	SPBC365.03c	gb|POE89950.1|	RL21_CYAPA, RecName: Full=60S ribosomal protein L21;	A0A1D1XWW0_9ARAE, SubName: Full=60S ribosomal protein L21-A {ECO:0000313|EMBL:JAT46885.1}; Flags: Fragment;
TRINITY_DN199378_c0_g1	0	54.2617	-8.2	3.71e-07	9.23e-05	down	--	--	--	--	--	--
TRINITY_DN171717_c0_g1	49.0697	8.01552	2.57	3.77e-07	9.34e-05	up	--	--	--	--	--	--
TRINITY_DN180234_c3_g2	45.0041	0	7.99	3.95e-07	9.69e-05	up	--	--	--	--	--	--
TRINITY_DN175870_c3_g1	95.0559	20.6751	2.21	3.95e-07	9.69e-05	up	GO:0009507,chloroplast; GO:0005829,cytosol; GO:0022626,cytosolic ribosome; GO:0022627,cytosolic small ribosomal subunit; GO:0016020,membrane; GO:0005634,nucleus; GO:0009506,plasmodesma; GO:0005774,vacuolar membrane; GO:0005773,vacuole; GO:0003684,damaged DNA binding; GO:0003729,mRNA binding; GO:0008534,oxidized purine nucleobase lesion DNA N-glycosylase activity; GO:0003735,structural constituent…	K02985: RP-S3e, RPS3; small subunit ribosomal protein S3e	At2g31610	dbj|BAK05398.1|	RS31_ARATH, RecName: Full=40S ribosomal protein S3-1;	F2EDH6_HORVV, SubName: Full=Predicted protein {ECO:0000313|EMBL:BAK05398.1};
TRINITY_DN200438_c0_g1	60.0979	0	8.41	3.96e-07	9.69e-05	up	--	--	--	--	--	--
TRINITY_DN307034_c0_g1	26.1684	0	7.21	3.97e-07	9.69e-05	up	--	--	--	--	--	--
TRINITY_DN184603_c3_g1	126.879	22.397	2.5	4.03e-07	9.8e-05	up	--	--	--	--	--	--
TRINITY_DN172495_c1_g2	29.4251	0	7.37	4.04e-07	9.8e-05	up	--	--	--	--	--	--
TRINITY_DN164229_c0_g1	76.0165	0	8.74	4.06e-07	9.8e-05	up	GO:0016020,membrane; GO:0003885,D-arabinono-1,4-lactone oxidase activity; GO:0050660,flavin adenine dinucleotide binding; GO:0050105,L-gulonolactone oxidase activity; GO:0019853,L-ascorbic acid biosynthetic process	--	At2g46750	ref|XP_003573784.1|	GGLO2_ARATH, RecName: Full=L-gulonolactone oxidase 2 {ECO:0000303|PubMed:20622436}; Short=AtGulLO2 {ECO:0000303|PubMed:20622436}; EC=1.1.3.8 {ECO:0000269|PubMed:20622436}; Flags: Precursor;	A0A1D5S415_WHEAT, SubName: Full=Uncharacterized protein {ECO:0000313|EnsemblPlants:TRIAE_CS42_1AS_TGACv1_020140_AA0075100.1};
TRINITY_DN185125_c0_g2	125.234	3.12662	5.32	4.18e-07	0.000101	up	--	K13457: RPM1, RPS3; disease resistance protein RPM1	--	gb|AAW78914.1|	--	A0A1D5SMN9_WHEAT, SubName: Full=Uncharacterized protein {ECO:0000313|EnsemblPlants:TRIAE_CS42_1BS_TGACv1_050506_AA0172880.1};
TRINITY_DN201813_c4_g2	614.9	0	11.76	4.22e-07	0.000101	up	--	--	--	--	--	--
TRINITY_DN201760_c6_g2	0	32.251	-7.45	4.3e-07	0.000103	down	--	--	--	--	--	--
TRINITY_DN178392_c2_g3	34.2865	0	7.6	4.34e-07	0.000103	up	--	--	--	--	--	--
TRINITY_DN180401_c0_g1	29.265	0	7.37	4.38e-07	0.000104	up	--	--	--	--	--	--
TRINITY_DN191640_c0_g1	56.161	7.06797	2.98	4.49e-07	0.000106	up	--	--	YDR536w	gb|POE76192.1|	--	A0A1D1Z372_9ARAE, SubName: Full=High-affinity glucose transporter {ECO:0000313|EMBL:JAT61299.1}; Flags: Fragment;
TRINITY_DN179304_c1_g1	0	48.3861	-8.03	4.52e-07	0.000107	down	--	--	--	--	--	--
TRINITY_DN153616_c0_g1	103.529	16.9798	2.63	4.74e-07	0.000111	up	--	--	--	--	--	--
TRINITY_DN183560_c0_g3	122.156	24.8803	2.29	4.81e-07	0.000112	up	--	--	--	gb|POF12756.1|	--	I0YQP4_COCSC, SubName: Full=Uncharacterized protein {ECO:0000313|EMBL:EIE20713.1};
TRINITY_DN180665_c1_g3	39.3949	0	7.8	4.85e-07	0.000113	up	--	--	--	--	--	--
TRINITY_DN237871_c0_g1	28.904	0	7.35	5e-07	0.000116	up	--	--	--	--	--	--
TRINITY_DN201278_c2_g4	74.5263	0	8.72	5.01e-07	0.000116	up	--	--	--	--	--	--
TRINITY_DN200090_c3_g7	0	28.9202	-7.29	5.02e-07	0.000116	down	--	--	--	--	--	--
TRINITY_DN178953_c3_g1	63.1778	12.4883	2.35	5.16e-07	0.000119	up	--	K00616: E2.2.1.2, talA, talB; transaldolase [EC:2.2.1.2]	SPCC1020.06c	gb|POF07060.1|	--	A0A1D1Y1D4_9ARAE, RecName: Full=Transaldolase {ECO:0000256|RuleBase:RU000501}; EC=2.2.1.2 {ECO:0000256|RuleBase:RU000501}; Flags: Fragment;
TRINITY_DN170498_c0_g1	54.7564	9.05812	2.62	5.18e-07	0.000119	up	GO:0005737,cytoplasm; GO:0005634,nucleus; GO:0005516,calmodulin binding; GO:0005528,FK506 binding; GO:0003755,peptidyl-prolyl cis-trans isomerase activity; GO:0070370,cellular heat acclimation; GO:0061077,chaperone-mediated protein folding	K09568: FKBP1; FK506-binding protein 1 [EC:5.2.1.8]	SPBC839.17c	ref|XP_002504077.1|	FKB62_ARATH, RecName: Full=Peptidyl-prolyl cis-trans isomerase FKBP62; Short=PPIase FKBP62; EC=5.2.1.8; AltName: Full=70 kDa peptidyl-prolyl isomerase; AltName: Full=FK506-binding protein 62; Short=AtFKBP62; AltName: Full=Immunophilin FKBP62; AltName: Full=Peptidylprolyl isomerase ROF1; AltName: Full=Protein ROTAMASE FKBP 1; AltName: Full=Rotamase;	A0A061R893_9CHLO, RecName: Full=Peptidylprolyl isomerase {ECO:0000256|PROSITE-ProRule:PRU00277}; EC=5.2.1.8 {ECO:0000256|PROSITE-ProRule:PRU00277};
TRINITY_DN176685_c2_g3	83.9302	0	8.89	5.41e-07	0.000124	up	--	--	--	--	--	--
TRINITY_DN181164_c3_g2	61.7367	0	8.45	5.44e-07	0.000124	up	--	--	--	--	--	--
TRINITY_DN196779_c1_g1	5610.44	1634.79	1.78	5.47e-07	0.000124	up	GO:0004518,nuclease activity; GO:0042742,defense response to bacterium; GO:0050832,defense response to fungus; GO:0031640,killing of cells of other organism; GO:0009626,plant-type hypersensitive response	--	At3g04720	emb|CAA71774.1|	WHW1_WHEAT, RecName: Full=Wheatwin-1; AltName: Full=Pathogenesis-related protein 4a; AltName: Full=Protein 0.14; AltName: Full=RNase; EC=3.1.-.-; Flags: Precursor;	A0A0E0MGR9_ORYPU, SubName: Full=Uncharacterized protein {ECO:0000313|EnsemblPlants:OPUNC11G15190.1};
TRINITY_DN186868_c2_g2	74.3723	13.2667	2.51	5.5e-07	0.000124	up	--	--	--	--	--	--
TRINITY_DN259118_c0_g1	27.977	0	7.3	5.51e-07	0.000124	up	--	--	--	--	--	--
TRINITY_DN172829_c0_g2	78.7109	18.2117	2.12	5.55e-07	0.000125	up	GO:0005739,mitochondrion; GO:0003690,double-stranded DNA binding; GO:0003723,RNA binding; GO:0003697,single-stranded DNA binding; GO:1900864,mitochondrial RNA modification; GO:0009409,response to cold; GO:0006970,response to osmotic stress; GO:0009651,response to salt stress; GO:0009414,response to water deprivation	K12741: HNRNPA1_3; heterogeneous nuclear ribonucleoprotein A1/A3	At3g23830	ref|XP_023516049.1|	RBG4_ARATH, RecName: Full=Glycine-rich RNA-binding protein 4, mitochondrial; Short=AtGR-RBP4; AltName: Full=AtRBG4; AltName: Full=Glycine-rich protein 4; Short=AtGRP4; AltName: Full=Mitochondrial RNA-binding protein 1b; Short=At-mRBP1b; Flags: Precursor;	A0A1J6JRV3_NICAT, SubName: Full=Glycine-rich rna-binding protein 3, mitochondrial {ECO:0000313|EMBL:OIT20474.1};
TRINITY_DN147986_c0_g1	29.6689	0	7.39	5.62e-07	0.000126	up	--	--	--	--	--	--
TRINITY_DN176349_c1_g1	48.4909	0	8.1	5.75e-07	0.000128	up	--	--	--	--	--	--
TRINITY_DN201386_c1_g2	0	43.1994	-7.87	5.76e-07	0.000128	down	--	--	--	--	--	--
TRINITY_DN181894_c0_g1	0.324036	67.6257	-7.55	5.82e-07	0.000129	down	GO:0000786,nucleosome; GO:0005634,nucleus; GO:0003677,DNA binding; GO:0046982,protein heterodimerization activity	K11251: H2A; histone H2A	Hs18545931	ref|NP_724343.1|	H2A4_VOLCA, RecName: Full=Histone H2A-IV;	A0A1U7XY83_NICSY, RecName: Full=Histone H2A {ECO:0000256|RuleBase:RU003767};
TRINITY_DN178011_c5_g2	43.7585	0	7.95	5.89e-07	0.00013	up	--	--	--	--	--	--
TRINITY_DN201414_c0_g1	0	68.708	-8.54	6.03e-07	0.000132	down	--	--	--	--	--	--
TRINITY_DN195747_c1_g1	0	56.5619	-8.26	6.03e-07	0.000132	down	--	--	--	--	--	--
TRINITY_DN178456_c9_g1	24.8894	0	7.13	6.04e-07	0.000132	up	--	--	--	--	--	--
TRINITY_DN201358_c3_g2	0	27.0241	-7.19	6.16e-07	0.000134	down	--	--	--	--	--	--
TRINITY_DN175960_c4_g1	28.6937	0	7.34	6.24e-07	0.000136	up	--	--	--	--	--	--
TRINITY_DN200496_c2_g1	3696.26	1542.61	1.26	6.33e-07	0.000137	up	--	--	--	--	--	--
TRINITY_DN174339_c0_g2	127.377	3.27762	5.22	6.39e-07	0.000138	up	--	--	--	--	--	--
TRINITY_DN183932_c0_g6	626.314	58.3963	3.42	6.56e-07	0.000141	up	--	--	--	--	--	--
TRINITY_DN190439_c0_g3	191.972	0	10.08	6.6e-07	0.000142	up	--	--	--	--	--	--
TRINITY_DN146049_c0_g1	47.2907	0	8.06	6.67e-07	0.000142	up	--	--	--	--	--	--
TRINITY_DN177667_c0_g1	2.29614	33.5416	-3.85	6.67e-07	0.000142	down	--	--	--	--	--	--
TRINITY_DN195698_c0_g5	25.7538	0	7.18	6.74e-07	0.000143	up	--	--	--	--	--	--
TRINITY_DN198813_c0_g1	0	32.9544	-7.47	6.84e-07	0.000145	down	--	--	--	--	--	--
TRINITY_DN170540_c0_g2	64.2894	11.2176	2.49	6.91e-07	0.000146	up	GO:0022625,cytosolic large ribosomal subunit; GO:0003723,RNA binding; GO:0003735,structural constituent of ribosome; GO:0002181,cytoplasmic translation	K02920: RP-L36e, RPL36; large subunit ribosomal protein L36e	SPBC405.07	gb|POE63574.1|	RL361_ARATH, RecName: Full=60S ribosomal protein L36-1;	A0A1D1YI50_9ARAE, RecName: Full=60S ribosomal protein L36 {ECO:0000256|RuleBase:RU000665}; Flags: Fragment;
TRINITY_DN195679_c0_g3	0	47.1144	-7.99	6.97e-07	0.000147	down	--	--	--	--	--	--
TRINITY_DN151856_c0_g1	0	24.7674	-7.07	7.11e-07	0.00015	down	--	--	--	--	--	--
TRINITY_DN187761_c0_g1	49.8928	7.56096	2.73	7.33e-07	0.000154	up	--	--	--	--	--	--
TRINITY_DN177018_c0_g2	27.7435	2.21717	3.66	7.39e-07	0.000154	up	--	--	--	--	--	--
TRINITY_DN302636_c0_g1	40.1992	0	7.83	7.43e-07	0.000155	up	--	--	--	--	--	--
TRINITY_DN34522_c0_g1	0	35.5312	-7.58	7.45e-07	0.000155	down	--	--	--	--	--	--
TRINITY_DN345377_c0_g1	0	32.541	-7.46	7.53e-07	0.000156	down	--	--	--	--	--	--
TRINITY_DN260507_c0_g1	37.4886	0	7.73	7.58e-07	0.000157	up	--	--	--	--	--	--
TRINITY_DN192005_c4_g8	24.716	0	7.12	7.76e-07	0.00016	up	GO:0005737,cytoplasm; GO:0003755,peptidyl-prolyl cis-trans isomerase activity; GO:0006457,protein folding	K01802: E5.2.1.8; peptidylprolyl isomerase [EC:5.2.1.8]	CE20371	ref|XP_005851021.1|	CYP1_SOYBN, RecName: Full=Peptidyl-prolyl cis-trans isomerase 1 {ECO:0000250|UniProtKB:O49886}; Short=PPIase 1 {ECO:0000250|UniProtKB:O49886}; EC=5.2.1.8; AltName: Full=Cyclophilin 1 {ECO:0000303|Ref.1}; AltName: Full=Cyclosporin A-binding protein 1 {ECO:0000250|UniProtKB:O49886}; AltName: Full=Rotamase 1 {ECO:0000250|UniProtKB:O49886};	E1Z6E6_CHLVA, RecName: Full=Peptidyl-prolyl cis-trans isomerase {ECO:0000256|RuleBase:RU363019}; Short=PPIase {ECO:0000256|RuleBase:RU363019}; EC=5.2.1.8 {ECO:0000256|RuleBase:RU363019};
TRINITY_DN234079_c0_g1	28.8241	0	7.35	7.8e-07	0.00016	up	--	--	YOR273c	gb|POE51742.1|	--	--
TRINITY_DN199338_c0_g8	42.9487	0	7.92	7.8e-07	0.00016	up	--	--	--	--	--	--
TRINITY_DN188099_c0_g2	71.8334	0	8.66	7.85e-07	0.00016	up	--	--	--	--	--	--
TRINITY_DN179939_c2_g7	26.9601	0	7.25	8.02e-07	0.000163	up	--	--	--	--	--	--
TRINITY_DN195467_c0_g4	24.3778	0	7.1	8.06e-07	0.000163	up	--	--	--	--	--	--
TRINITY_DN183075_c3_g4	45.056	7.82642	2.56	8.08e-07	0.000163	up	GO:0022625,cytosolic large ribosomal subunit; GO:0003723,RNA binding; GO:0003735,structural constituent of ribosome; GO:0000027,ribosomal large subunit assembly; GO:0006412,translation	K02925: RP-L3e, RPL3; large subunit ribosomal protein L3e	SPAC17A5.03	dbj|BAJ91634.1|	RL3_ORYSJ, RecName: Full=60S ribosomal protein L3;	F2D963_HORVV, SubName: Full=Predicted protein {ECO:0000313|EMBL:BAJ91634.1};
TRINITY_DN179798_c0_g8	31.6648	0	7.48	8.29e-07	0.000167	up	--	--	--	--	--	--
TRINITY_DN9959_c0_g1	24.5169	0	7.11	8.3e-07	0.000167	up	--	--	--	--	--	--
TRINITY_DN189740_c1_g1	0	25.5441	-7.11	8.49e-07	0.000169	down	--	--	--	--	--	--
TRINITY_DN180803_c1_g1	62.5562	0	8.46	8.49e-07	0.000169	up	--	--	--	--	--	--
TRINITY_DN161074_c1_g1	31.8654	0	7.49	8.52e-07	0.00017	up	--	--	--	--	--	--
TRINITY_DN168272_c0_g1	66.6401	0	8.55	8.72e-07	0.000173	up	--	--	--	--	--	--
TRINITY_DN196972_c5_g2	0	55.3363	-8.22	8.74e-07	0.000173	down	--	--	--	--	--	--
TRINITY_DN201786_c4_g1	39.1901	0	7.79	8.82e-07	0.000174	up	--	--	--	--	--	--
TRINITY_DN176335_c0_g1	46.4889	5.38241	3.11	9.52e-07	0.000187	up	--	--	--	--	--	--
TRINITY_DN167856_c2_g2	26.9624	0	7.25	9.6e-07	0.000188	up	--	--	--	--	--	--
TRINITY_DN178305_c3_g6	82.7747	15.5765	2.4	9.72e-07	0.00019	up	GO:0015935,small ribosomal subunit; GO:0003723,RNA binding; GO:0003735,structural constituent of ribosome; GO:0006412,translation	K02958: RP-S15e, RPS15; small subunit ribosomal protein S15e	SPAC1071.07c	gb|POF12787.1|	RS15_ELAOL, RecName: Full=40S ribosomal protein S15;	A0A1D1Y1W9_9ARAE, SubName: Full=40S ribosomal protein S15 {ECO:0000313|EMBL:JAT48635.1};
TRINITY_DN209335_c0_g1	23.834	0	7.07	9.77e-07	0.00019	up	--	--	--	--	--	--
TRINITY_DN196243_c0_g1	63.1415	146.918	-1.22	9.89e-07	0.000192	down	GO:0000785,chromatin; GO:0005829,cytosol; GO:0005634,nucleus; GO:0003682,chromatin binding; GO:0005085,guanyl-nucleotide exchange factor activity; GO:0042802,identical protein binding; GO:0009881,photoreceptor activity; GO:0042803,protein homodimerization activity; GO:0009649,entrainment of circadian clock; GO:0018298,protein-chromophore linkage; GO:0009411,response to UV; GO:0010224,response to …	K10614: HERC3; E3 ubiquitin-protein ligase HERC3 [EC:2.3.2.26]	At3g02300	gb|EAY90895.1|	UVR8_ARATH, RecName: Full=Ultraviolet-B receptor UVR8; AltName: Full=Protein UV-B RESISTANCE 8; AltName: Full=RCC1 domain-containing protein UVR8;	A2XJ85_ORYSI, SubName: Full=Uncharacterized protein {ECO:0000313|EMBL:EAY90895.1};
TRINITY_DN70616_c0_g1	28.8149	0	7.34	9.93e-07	0.000193	up	--	--	--	--	--	--
TRINITY_DN171634_c0_g5	36.0459	0	7.67	1.01e-06	0.000195	up	--	--	--	--	--	--
TRINITY_DN196062_c1_g2	31.7651	0	7.48	1.03e-06	0.000199	up	--	--	--	--	--	--
TRINITY_DN272627_c0_g1	0	55.9875	-8.24	1.06e-06	0.000203	down	--	--	--	--	--	--
TRINITY_DN201903_c2_g4	311.702	0	10.78	1.08e-06	0.000207	up	--	--	--	--	--	--
TRINITY_DN192585_c0_g3	609.099	1283.4	-1.08	1.09e-06	0.000208	down	GO:0016021,integral component of membrane; GO:0005886,plasma membrane; GO:0005385,zinc ion transmembrane transporter activity; GO:0071577,zinc ion transmembrane transport; GO:0006829,zinc ion transport	K14709: SLC39A1_2_3, ZIP1_2_3; solute carrier family 39 (zinc transporter), member 1/2/3	At3g12750	ref|XP_020181371.1|	ZIP8_ORYSJ, RecName: Full=Zinc transporter 8; AltName: Full=ZRT/IRT-like protein 8; Short=OsZIP8; Flags: Precursor;	A0A1D5TII4_WHEAT, SubName: Full=Uncharacterized protein {ECO:0000313|EnsemblPlants:TRIAE_CS42_2AS_TGACv1_112113_AA0330750.1};
TRINITY_DN199530_c1_g9	1206.69	520.741	1.21	1.09e-06	0.000208	up	--	--	--	--	--	--
TRINITY_DN189023_c1_g2	116.735	493.511	-2.08	1.11e-06	0.00021	down	--	--	--	--	--	--
TRINITY_DN178847_c1_g1	41.6678	0.246237	6.92	1.11e-06	0.00021	up	--	--	--	--	--	--
TRINITY_DN188685_c0_g1	50.2168	7.97794	2.67	1.12e-06	0.000212	up	--	--	--	gb|POE77724.1|	--	Q6W7J3_ORYSI, SubName: Full=Putative opsin {ECO:0000313|EMBL:AAQ75384.1};
TRINITY_DN185929_c0_g4	33.2865	0	7.55	1.14e-06	0.000215	up	--	--	--	--	--	--
TRINITY_DN173969_c4_g1	50.0921	1.13699	5.36	1.16e-06	0.000217	up	--	--	SPBC21C3.19	gb|POE66087.1|	--	A0A1D1ZBD3_9ARAE, SubName: Full=SDO1-like protein C21C3.19 {ECO:0000313|EMBL:JAT64181.1};
TRINITY_DN201665_c3_g3	95.9525	18.9315	2.36	1.17e-06	0.000219	up	--	--	--	ref|XP_020195405.1|	--	A0A1D6DLQ4_WHEAT, SubName: Full=Uncharacterized protein {ECO:0000313|EnsemblPlants:TRIAE_CS42_U_TGACv1_650491_AA2149130.1};
TRINITY_DN190260_c1_g1	0	28.4826	-7.26	1.18e-06	0.000219	down	--	--	--	--	--	--
TRINITY_DN177733_c0_g1	49.1332	9.419	2.41	1.19e-06	0.000221	up	GO:0005618,cell wall; GO:0009507,chloroplast; GO:0016020,membrane; GO:0005886,plasma membrane; GO:0005524,ATP binding; GO:0009408,response to heat; GO:0009615,response to virus	K03283: HSPA1s; heat shock 70kDa protein 1/2/6/8	SPAC13G7.02c	gb|AFK44414.1|	HSP7E_ARATH, RecName: Full=Heat shock 70 kDa protein 5; AltName: Full=Heat shock protein 70-5; Short=AtHsp70-5; AltName: Full=Heat shock protein 70b;	H3G6U3_PHYRM, SubName: Full=Uncharacterized protein {ECO:0000313|EnsemblProtists:Phyra47873};
TRINITY_DN196370_c3_g10	23.8722	0	7.07	1.19e-06	0.000221	up	--	--	--	--	--	--
TRINITY_DN174462_c0_g4	274.354	62.3316	2.14	1.2e-06	0.000223	up	--	K22464: FAP; fatty acid photodecarboxylase [EC:4.1.1.106]	--	gb|POE71338.1|	--	I0YJ13_COCSC, SubName: Full=Alcohol oxidase {ECO:0000313|EMBL:EIE18382.1};
TRINITY_DN175797_c0_g1	0	29.4691	-7.32	1.26e-06	0.000233	down	--	K13457: RPM1, RPS3; disease resistance protein RPM1	--	gb|PNT69727.1|	--	I1IFP2_BRADI, SubName: Full=Uncharacterized protein {ECO:0000313|EnsemblPlants:BRADI3G60446.1};
TRINITY_DN198094_c0_g1	63.6818	130.815	-1.03	1.27e-06	0.000234	down	GO:0016021,integral component of membrane; GO:0005886,plasma membrane; GO:0005524,ATP binding; GO:0004674,protein serine/threonine kinase activity; GO:0042742,defense response to bacterium; GO:0006468,protein phosphorylation	K04733: IRAK4; interleukin-1 receptor-associated kinase 4 [EC:2.7.11.1]	At4g05200	ref|XP_003577692.1|	CRK25_ARATH, RecName: Full=Cysteine-rich receptor-like protein kinase 25; Short=Cysteine-rich RLK25; EC=2.7.11.-; Flags: Precursor;	I1IMG6_BRADI, SubName: Full=Uncharacterized protein {ECO:0000313|EMBL:KQJ88899.1, ECO:0000313|EnsemblPlants:BRADI4G21990.2};
TRINITY_DN184382_c1_g3	123.141	27.8405	2.16	1.31e-06	0.00024	up	--	K01624: FBA, fbaA; fructose-bisphosphate aldolase, class II [EC:4.1.2.13]	YKL060c	gb|POE74315.1|	--	A0A1D1YI96_9ARAE, SubName: Full=Fructose-bisphosphate aldolase {ECO:0000313|EMBL:JAT54352.1};
TRINITY_DN177306_c3_g3	37.0464	0.322256	6.75	1.33e-06	0.000243	up	--	--	--	gb|POE76235.1|	--	G5A444_PHYSP, SubName: Full=Chloroperoxidase {ECO:0000313|EMBL:EGZ09490.1};
TRINITY_DN183640_c1_g5	0	35.3274	-7.57	1.34e-06	0.000245	down	--	--	--	--	--	--
TRINITY_DN196856_c0_g3	57.8094	14.9706	1.93	1.39e-06	0.000254	up	--	--	--	--	--	--
TRINITY_DN191002_c4_g8	0	34.5881	-7.54	1.4e-06	0.000254	down	--	--	--	--	--	--
TRINITY_DN201566_c2_g1	145.111	37.3284	1.95	1.42e-06	0.000257	up	--	K13457: RPM1, RPS3; disease resistance protein RPM1	--	gb|PNT63182.1|	--	A0A0Q3EMW4_BRADI, SubName: Full=Uncharacterized protein {ECO:0000313|EMBL:KQJ87644.1};
TRINITY_DN187874_c0_g1	38.6318	5.49583	2.84	1.43e-06	0.000258	up	--	--	--	gb|POF05841.1|	--	--
TRINITY_DN160616_c1_g3	0	25.6034	-7.11	1.45e-06	0.000261	down	--	--	--	--	--	--
TRINITY_DN199434_c0_g5	0	38.4692	-7.7	1.47e-06	0.000263	down	--	--	--	--	--	--
TRINITY_DN196198_c1_g3	0	34.72	-7.55	1.47e-06	0.000263	down	GO:0043231,intracellular membrane-bounded organelle; GO:0004519,endonuclease activity; GO:0003723,RNA binding; GO:0009451,RNA modification	K19589: N6AMT1; release factor glutamine methyltransferase [EC:2.1.1.297]	At3g51320	ref|XP_020198367.1|	PP278_ARATH, RecName: Full=Pentatricopeptide repeat-containing protein At3g51320;	A0A287EH30_HORVV, SubName: Full=Uncharacterized protein {ECO:0000313|EnsemblPlants:HORVU1Hr1G003050.1};
TRINITY_DN231790_c0_g1	32.5278	0	7.52	1.48e-06	0.000265	up	--	--	--	--	--	--
TRINITY_DN177798_c0_g2	68.346	10.7825	2.64	1.49e-06	0.000265	up	GO:0005759,mitochondrial matrix; GO:0030060,L-malate dehydrogenase activity; GO:0005975,carbohydrate metabolic process; GO:0006108,malate metabolic process; GO:0006099,tricarboxylic acid cycle	K00026: MDH2; malate dehydrogenase [EC:1.1.1.37]	YKL085w	gb|POE94700.1|	MDHM_CHLRE, RecName: Full=Malate dehydrogenase, mitochondrial; EC=1.1.1.37; Flags: Precursor;	A0A0D6QY17_ARACU, RecName: Full=Malate dehydrogenase {ECO:0000256|RuleBase:RU003405}; EC=1.1.1.37 {ECO:0000256|RuleBase:RU003405};
TRINITY_DN336703_c0_g1	27.808	0	7.29	1.5e-06	0.000267	up	--	--	--	--	--	--
TRINITY_DN176217_c2_g1	0	40.5393	-7.78	1.51e-06	0.000268	down	GO:0003677,DNA binding; GO:0046872,metal ion binding; GO:0003723,RNA binding	K03260: EIF4G; translation initiation factor 4G	--	gb|PNT63249.1|	C3H43_ORYSJ, RecName: Full=Zinc finger CCCH domain-containing protein 43; Short=OsC3H43;	A0A0Q3MPK7_BRADI, SubName: Full=Uncharacterized protein {ECO:0000313|EMBL:KQK06142.1};
TRINITY_DN199938_c0_g1	26.0297	0	7.2	1.53e-06	0.00027	up	--	--	--	--	--	--
TRINITY_DN177057_c5_g5	39.3243	0.663211	5.96	1.54e-06	0.000271	up	--	--	--	gb|POF20118.1|	--	--
TRINITY_DN182521_c0_g1	58.4986	3.94083	3.83	1.54e-06	0.000271	up	--	--	--	ref|XP_022684874.1|	--	A0A0E0HNU7_ORYNI, SubName: Full=Uncharacterized protein {ECO:0000313|EnsemblPlants:ONIVA06G11970.1};
TRINITY_DN145906_c0_g1	30.9628	110.271	-1.83	1.54e-06	0.000271	down	--	--	--	--	--	--
TRINITY_DN176086_c2_g1	0	39.5233	-7.74	1.57e-06	0.000274	down	--	--	--	--	--	--
TRINITY_DN176038_c2_g2	48.1065	0.738711	5.78	1.59e-06	0.000278	up	--	--	--	--	--	--
TRINITY_DN198329_c1_g1	0	38.2731	-7.7	1.62e-06	0.000282	down	--	--	--	--	--	--
TRINITY_DN174226_c0_g2	0	30.4186	-7.36	1.64e-06	0.000285	down	--	--	--	--	--	--
TRINITY_DN176461_c2_g2	56.591	0	8.32	1.65e-06	0.000286	up	--	--	YFL014w	gb|POE66144.1|	--	A0A0D6R811_ARACU, SubName: Full=Uncharacterized protein {ECO:0000313|EMBL:JAG98974.1};
TRINITY_DN347500_c0_g1	33.3349	0	7.56	1.66e-06	0.000287	up	--	--	--	--	--	--
TRINITY_DN182180_c0_g1	74.3211	16.1834	2.21	1.7e-06	0.000293	up	GO:0005840,ribosome	K02896: RP-L24e, RPL24; large subunit ribosomal protein L24e	SPAC6G9.09c	gb|POE59148.1|	RL24_HORVU, RecName: Full=60S ribosomal protein L24;	A0A1D1YP06_9ARAE, SubName: Full=60S ribosomal protein L24 {ECO:0000313|EMBL:JAT56367.1};
TRINITY_DN186552_c3_g1	64.6634	170.646	-1.4	1.75e-06	0.000301	down	--	K14797: ENP1, BYSL; essential nuclear protein 1	At1g31660	ref|XP_003580837.1|	--	I1J3F8_BRADI, SubName: Full=Uncharacterized protein {ECO:0000313|EMBL:KQJ85337.1, ECO:0000313|EnsemblPlants:BRADI5G26400.1};
TRINITY_DN199219_c1_g1	31.1626	0	7.46	1.75e-06	0.000301	up	--	--	--	--	--	--
TRINITY_DN200502_c2_g7	0	64.512	-8.45	1.78e-06	0.000304	down	--	--	--	--	--	--
TRINITY_DN193664_c1_g1	89.464	17.9826	2.31	1.8e-06	0.000307	up	GO:0005618,cell wall; GO:0009507,chloroplast; GO:0005829,cytosol; GO:0022626,cytosolic ribosome; GO:0022627,cytosolic small ribosomal subunit; GO:0016020,membrane; GO:0005730,nucleolus; GO:0009506,plasmodesma; GO:0042788,polysomal ribosome; GO:0005774,vacuolar membrane; GO:0003729,mRNA binding; GO:0019843,rRNA binding; GO:0003735,structural constituent of ribosome; GO:0045903,positive regulation …	K02997: RP-S9e, RPS9; small subunit ribosomal protein S9e	SPBC29A3.12	dbj|BAJ85708.1|	RS91_ARATH, RecName: Full=40S ribosomal protein S9-1;	F2CS87_HORVV, SubName: Full=Predicted protein {ECO:0000313|EMBL:BAJ85708.1};
TRINITY_DN192626_c0_g6	11.7829	71.2731	-2.6	1.81e-06	0.000308	down	--	--	--	--	--	--
TRINITY_DN176425_c0_g1	46.513	8.54591	2.43	1.83e-06	0.00031	up	--	--	--	--	--	--
TRINITY_DN173365_c0_g2	0	61.05	-8.37	1.83e-06	0.00031	down	--	--	--	--	--	--
TRINITY_DN201278_c2_g3	143.186	0	9.66	1.87e-06	0.000315	up	--	--	--	--	--	--
TRINITY_DN317890_c0_g1	24.3083	0	7.1	1.93e-06	0.000324	up	--	--	--	--	--	--
TRINITY_DN192350_c0_g2	25.9521	0	7.19	2e-06	0.000335	up	--	--	--	--	--	--
TRINITY_DN326334_c0_g1	24.674	0	7.12	2e-06	0.000335	up	--	--	--	--	--	--
TRINITY_DN187188_c3_g1	54.558	8.8879	2.65	2.05e-06	0.000341	up	GO:0005737,cytoplasm; GO:0005730,nucleolus; GO:0005524,ATP binding; GO:0004004,ATP-dependent RNA helicase activity; GO:0003723,RNA binding; GO:0000184,nuclear-transcribed mRNA catabolic process, nonsense-mediated decay; GO:0010501,RNA secondary structure unwinding; GO:0006364,rRNA processing	K12823: DDX5, DBP2; ATP-dependent RNA helicase DDX5/DBP2 [EC:3.6.4.13]	SPBP8B7.16c	gb|POF13320.1|	RH20_ORYSJ, RecName: Full=DEAD-box ATP-dependent RNA helicase 20; EC=3.6.4.13;	D8RNW7_SELML, SubName: Full=Uncharacterized protein {ECO:0000313|EMBL:EFJ26152.1};
TRINITY_DN195850_c5_g1	43.2885	0.246237	6.97	2.05e-06	0.000341	up	--	--	--	--	--	--
TRINITY_DN187415_c1_g1	78.8055	163.96	-1.06	2.07e-06	0.000344	down	--	K22378: RNF181; E3 ubiquitin-protein ligase RNF181 [EC:2.3.2.27]	At2g15580	dbj|BAC22255.1|	--	A0A0E0L8L0_ORYPU, SubName: Full=Uncharacterized protein {ECO:0000313|EnsemblPlants:OPUNC06G05000.1};
TRINITY_DN201903_c2_g1	797.724	3.65771	7.76	2.08e-06	0.000344	up	--	--	--	--	--	--
TRINITY_DN352513_c0_g1	0	24.1624	-7.03	2.08e-06	0.000344	down	--	--	--	--	--	--
TRINITY_DN198368_c1_g3	0	24.0864	-7.02	2.16e-06	0.000356	down	--	--	--	--	--	--
TRINITY_DN200888_c1_g3	0	43.8584	-7.89	2.16e-06	0.000356	down	--	--	--	--	--	--
TRINITY_DN170705_c0_g1	104.412	22.1906	2.23	2.17e-06	0.000356	up	GO:0005829,cytosol; GO:0022625,cytosolic large ribosomal subunit; GO:0022626,cytosolic ribosome; GO:0005730,nucleolus; GO:0042788,polysomal ribosome; GO:0003735,structural constituent of ribosome; GO:0006412,translation	K02912: RP-L32e, RPL32; large subunit ribosomal protein L32e	SPAC3H5.10	gb|POF13740.1|	RL321_ARATH, RecName: Full=60S ribosomal protein L32-1;	A0A1D1Y795_9ARAE, SubName: Full=60S ribosomal protein L32 {ECO:0000313|EMBL:JAT50514.1}; Flags: Fragment;
TRINITY_DN61794_c0_g1	25.7966	0	7.19	2.18e-06	0.000356	up	--	--	--	--	--	--
TRINITY_DN154644_c0_g2	21.8654	0	6.95	2.19e-06	0.000358	up	--	--	--	--	--	--
TRINITY_DN191406_c1_g1	53.6522	0	8.24	2.21e-06	0.000359	up	--	--	--	--	--	--
TRINITY_DN193734_c3_g1	0	22.2864	-6.91	2.28e-06	0.000371	down	GO:0000786,nucleosome; GO:0005634,nucleus; GO:0003677,DNA binding; GO:0046982,protein heterodimerization activity	K11253: H3; histone H3	Hs4504279	dbj|BAD90809.1|	H32_ENCAL, RecName: Full=Histone H3.2;	A0A1D1ZDV0_9ARAE, RecName: Full=Histone H3 {ECO:0000256|RuleBase:RU004471};
TRINITY_DN201659_c2_g2	363.111	93.453	1.95	2.3e-06	0.000373	up	GO:0005737,cytoplasm; GO:0005525,GTP binding; GO:0003924,GTPase activity; GO:0003746,translation elongation factor activity	--	Hs22046639	dbj|BAJ90196.1|	EF1AC_PORPU, RecName: Full=Elongation factor 1-alpha C; Short=EF-1-alpha C;	F2D525_HORVV, RecName: Full=Elongation factor 1-alpha {ECO:0000256|RuleBase:RU000325};
TRINITY_DN173200_c0_g1	227.136	515.565	-1.18	2.32e-06	0.000376	down	GO:0048046,apoplast; GO:0004857,enzyme inhibitor activity; GO:0046910,pectinesterase inhibitor activity	--	At1g62770	ref|XP_020179814.1|	PMEI9_ARATH, RecName: Full=Pectinesterase inhibitor 9 {ECO:0000305}; AltName: Full=Pectin methylesterase inhibitor 9 {ECO:0000303|PubMed:28034952}; Short=AtPMEI9 {ECO:0000303|PubMed:28034952}; Flags: Precursor;	A0A1D5SFE1_WHEAT, SubName: Full=Uncharacterized protein {ECO:0000313|EnsemblPlants:TRIAE_CS42_1BL_TGACv1_032547_AA0131250.1};
TRINITY_DN199906_c2_g1	0	28.2374	-7.25	2.38e-06	0.000384	down	--	--	--	--	--	--
TRINITY_DN192005_c4_g1	32.6858	0	7.53	2.4e-06	0.000386	up	--	--	--	--	--	--
TRINITY_DN198348_c4_g4	0	27.8371	-7.23	2.41e-06	0.000388	down	--	--	--	--	--	--
TRINITY_DN182890_c1_g2	82.6056	10.3655	2.97	2.46e-06	0.000394	up	GO:0005840,ribosome	K02975: RP-S25e, RPS25; small subunit ribosomal protein S25e	SPAC694.05c	gb|POE86500.1|	RS25_SOLLC, RecName: Full=40S ribosomal protein S25;	F2E7F0_HORVV, SubName: Full=Predicted protein {ECO:0000313|EMBL:BAK03272.1};
TRINITY_DN192131_c1_g5	34.8928	0	7.62	2.48e-06	0.000396	up	--	--	--	--	--	--
TRINITY_DN185665_c0_g2	41.7194	5.09703	3.01	2.49e-06	0.000398	up	--	--	SPAC10F6.06	gb|POE78659.1|	--	A0A1D1YPH2_9ARAE, SubName: Full=Protein vip1 {ECO:0000313|EMBL:JAT56513.1};
TRINITY_DN1483_c1_g1	0	22.6652	-6.93	2.5e-06	0.000399	down	--	--	--	--	--	--
TRINITY_DN172566_c0_g2	186.231	55.2587	1.76	2.51e-06	0.000399	up	--	--	--	--	--	--
TRINITY_DN196507_c0_g1	84.567	11.3503	2.89	2.52e-06	0.000399	up	--	--	SPCC548.07c	gb|POE82227.1|	--	A0A0D6R281_ARACU, SubName: Full=Uncharacterized protein {ECO:0000313|EMBL:JAG96929.1};
TRINITY_DN173210_c0_g5	21.0263	0	6.89	2.62e-06	0.000414	up	--	--	--	--	--	--
TRINITY_DN175157_c0_g1	47.4808	9.02072	2.41	2.66e-06	0.000419	up	--	--	YHL008c	gb|POF02576.1|	--	A3E4C4_PROMN, SubName: Full=Nitrate transporter {ECO:0000313|EMBL:ABI14400.1};
TRINITY_DN201133_c2_g2	178.263	401.476	-1.17	2.69e-06	0.000423	down	GO:0009570,chloroplast stroma; GO:0004072,aspartate kinase activity; GO:0005524,ATP binding; GO:0008652,cellular amino acid biosynthetic process; GO:0009089,lysine biosynthetic process via diaminopimelate; GO:0009088,threonine biosynthetic process	K00928: lysC; aspartate kinase [EC:2.7.2.4]	At5g13280	ref|XP_003562409.1|	AK1_ARATH, RecName: Full=Aspartokinase 1, chloroplastic; EC=2.7.2.4; AltName: Full=Aspartate kinase 1; Flags: Precursor;	A0A0Q3JIN4_BRADI, SubName: Full=Uncharacterized protein {ECO:0000313|EMBL:KQK12132.1};
TRINITY_DN170396_c4_g5	32.1943	0.416974	6.54	2.72e-06	0.000428	up	--	--	--	gb|ACU15598.1|	--	C6T1X6_SOYBN, SubName: Full=Uncharacterized protein {ECO:0000313|EMBL:ACU15598.1};
TRINITY_DN192005_c4_g5	45.2298	0	8	2.74e-06	0.000429	up	--	--	--	--	--	--
TRINITY_DN188309_c3_g2	39.6693	0	7.81	2.77e-06	0.000432	up	--	--	--	--	--	--
TRINITY_DN229529_c0_g1	0	31.4948	-7.42	2.77e-06	0.000432	down	--	--	--	--	--	--
TRINITY_DN186344_c0_g3	8.05842	39.0748	-2.29	2.82e-06	0.000439	down	--	--	--	--	--	--
TRINITY_DN174759_c3_g1	21.8585	0	6.95	2.86e-06	0.000445	up	--	--	--	--	--	--
TRINITY_DN106042_c0_g1	32.6987	0	7.53	2.88e-06	0.000447	up	--	--	--	--	--	--
TRINITY_DN163111_c0_g2	38.565	0	7.77	3.03e-06	0.000468	up	--	--	--	--	--	--
TRINITY_DN177801_c0_g5	0	46.7797	-7.99	3.11e-06	0.000479	down	--	--	--	--	--	--
TRINITY_DN187298_c1_g3	34.9223	2.70965	3.66	3.13e-06	0.000482	up	GO:0045551,cinnamyl-alcohol dehydrogenase activity; GO:0052747,sinapyl alcohol dehydrogenase activity; GO:0008270,zinc ion binding; GO:0009809,lignin biosynthetic process	K00083: E1.1.1.195; cinnamyl-alcohol dehydrogenase [EC:1.1.1.195]	--	gb|POE46983.1|	CADH2_ARATH, RecName: Full=Cinnamyl alcohol dehydrogenase 2; Short=AtCAD2; EC=1.1.1.195;	A9T4F7_PHYPA, SubName: Full=Predicted protein {ECO:0000313|EMBL:EDQ61675.1};
TRINITY_DN139120_c1_g1	39.1775	0	7.79	3.17e-06	0.000487	up	--	--	--	--	--	--
TRINITY_DN171798_c0_g2	143.951	24.7465	2.53	3.19e-06	0.000489	up	--	--	--	ref|XP_005647888.1|	--	I0YY75_COCSC, SubName: Full=Uncharacterized protein {ECO:0000313|EMBL:EIE23344.1};
TRINITY_DN180507_c0_g1	29.4767	0	7.38	3.2e-06	0.00049	up	--	--	--	--	--	--
TRINITY_DN143730_c0_g1	79.3021	0	8.81	3.31e-06	0.000505	up	--	--	--	--	--	--
TRINITY_DN190251_c3_g2	0	36.5165	-7.63	3.32e-06	0.000505	down	--	--	--	--	--	--
TRINITY_DN167008_c0_g1	93.4204	17.1505	2.47	3.32e-06	0.000505	up	GO:0022625,cytosolic large ribosomal subunit; GO:0022626,cytosolic ribosome; GO:0042788,polysomal ribosome; GO:0003723,RNA binding; GO:0003735,structural constituent of ribosome; GO:0002181,cytoplasmic translation; GO:0042273,ribosomal large subunit biogenesis	K02898: RP-L26e, RPL26; large subunit ribosomal protein L26e	At5g67510	ref|XP_011400691.1|	RL262_ARATH, RecName: Full=60S ribosomal protein L26-2;	A0A087SPQ0_AUXPR, SubName: Full=60S ribosomal protein L26-2 {ECO:0000313|EMBL:KFM27704.1};
TRINITY_DN179764_c1_g3	4.71033	50.7894	-3.43	3.33e-06	0.000505	down	--	--	--	--	--	--
TRINITY_DN216230_c0_g1	31.3643	0	7.47	3.34e-06	0.000506	up	--	--	--	--	--	--
TRINITY_DN165590_c0_g1	72.7429	14.7999	2.28	3.35e-06	0.000506	up	--	--	--	--	--	--
TRINITY_DN166199_c1_g1	28.6949	0.890749	4.94	3.36e-06	0.000506	up	--	--	--	--	--	--
TRINITY_DN198187_c1_g2	207.441	59.5596	1.79	3.4e-06	0.000511	up	GO:0060320,rejection of self pollen	K04733: IRAK4; interleukin-1 receptor-associated kinase 4 [EC:2.7.11.1]	--	gb|PNT61927.1|	SLSG6_BRAOL, RecName: Full=S-locus-specific glycoprotein S6; Short=SLSG-6; Flags: Precursor;	I1J295_BRADI, SubName: Full=Uncharacterized protein {ECO:0000313|EnsemblPlants:BRADI5G23060.1};
TRINITY_DN186868_c2_g1	111.854	23.649	2.25	3.43e-06	0.000514	up	GO:0022627,cytosolic small ribosomal subunit; GO:0005794,Golgi apparatus; GO:0005634,nucleus; GO:0005886,plasma membrane; GO:0009506,plasmodesma; GO:0046872,metal ion binding; GO:0003735,structural constituent of ribosome; GO:0006412,translation	K02977: RP-S27Ae, RPS27A; small subunit ribosomal protein S27Ae	7297689	ref|XP_010507927.1|	R27AA_ARATH, RecName: Full=Ubiquitin-40S ribosomal protein S27a-1; Contains: RecName: Full=Ubiquitin; Contains: RecName: Full=40S ribosomal protein S27a-1; Flags: Precursor;	V4LVC5_EUTSA, SubName: Full=Uncharacterized protein {ECO:0000313|EMBL:ESQ43848.1};
TRINITY_DN151794_c0_g2	29.1067	0	7.36	3.43e-06	0.000514	up	--	--	--	--	--	--
TRINITY_DN169844_c1_g1	278.364	71.0738	1.96	3.47e-06	0.000518	up	GO:0016021,integral component of membrane; GO:0016020,membrane; GO:0005886,plasma membrane; GO:0009506,plasmodesma; GO:0090406,pollen tube; GO:0005524,ATP binding; GO:0004674,protein serine/threonine kinase activity	K04733: IRAK4; interleukin-1 receptor-associated kinase 4 [EC:2.7.11.1]	At4g08850	ref|XP_020181184.1|	MIK2_ARATH, RecName: Full=MDIS1-interacting receptor like kinase 2 {ECO:0000303|PubMed:26863186}; Short=AtMIK2 {ECO:0000303|PubMed:26863186}; AltName: Full=Probable LRR receptor-like serine/threonine-protein kinase At4g08850; EC=2.7.11.1 {ECO:0000305}; Flags: Precursor;	A0A1D5T509_WHEAT, SubName: Full=Uncharacterized protein {ECO:0000313|EnsemblPlants:TRIAE_CS42_1DS_TGACv1_081729_AA0262450.1};
TRINITY_DN185306_c1_g3	49.153	155.315	-1.66	3.47e-06	0.000518	down	--	K13457: RPM1, RPS3; disease resistance protein RPM1	--	ref|XP_014754485.1|	--	A0A0Q3IQG8_BRADI, SubName: Full=Uncharacterized protein {ECO:0000313|EMBL:KQK08107.1}; Flags: Fragment;
TRINITY_DN165148_c0_g1	54.2505	12.2223	2.14	3.5e-06	0.00052	up	GO:0022625,cytosolic large ribosomal subunit; GO:0003729,mRNA binding; GO:0003735,structural constituent of ribosome; GO:0000463,maturation of LSU-rRNA from tricistronic rRNA transcript (SSU-rRNA, 5.8S rRNA, LSU-rRNA); GO:0006412,translation	K02918: RP-L35e, RPL35; large subunit ribosomal protein L35e	At3g55170	ref|XP_013468295.1|	RL353_ARATH, RecName: Full=60S ribosomal protein L35-3;	I3T617_MEDTR, SubName: Full=60S ribosomal L35-like protein {ECO:0000313|EMBL:KEH42332.1};
TRINITY_DN177293_c0_g2	35.4988	5.59055	2.7	3.52e-06	0.000522	up	GO:0036381,pyridoxal 5'-phosphate synthase (glutamine hydrolysing) activity; GO:0042823,pyridoxal phosphate biosynthetic process	K06215: pdxS, pdx1; pyridoxal 5'-phosphate synthase pdxS subunit [EC:4.3.3.6]	SPAC29B12.04	ref|XP_018385101.1|	PDX1_GINBI, RecName: Full=Probable pyridoxal 5'-phosphate synthase subunit PDX1; Short=PLP synthase subunit PDX1; EC=4.3.3.6; AltName: Full=Sor-like protein;	A0A1D1YNU6_9ARAE, SubName: Full=Pyridoxine biosynthesis protein PDX1 {ECO:0000313|EMBL:JAT56318.1}; Flags: Fragment;
TRINITY_DN196420_c6_g4	20.4997	0	6.85	3.57e-06	0.000527	up	--	--	SPAP7G5.06	gb|POE49311.1|	--	A0A0D6R0W7_ARACU, SubName: Full=Uncharacterized protein {ECO:0000313|EMBL:JAG95550.1};
TRINITY_DN184529_c1_g6	21.6537	0	6.93	3.57e-06	0.000527	up	--	K02429: fucP; MFS transporter, FHS family, L-fucose permease	--	ref|XP_001751264.1|	--	A9RB56_PHYPA, SubName: Full=Uncharacterized protein {ECO:0000313|EMBL:EDQ83581.1};
TRINITY_DN181889_c7_g1	26.0339	0	7.2	3.59e-06	0.000528	up	--	--	--	--	--	--
TRINITY_DN188203_c2_g3	0	22.5137	-6.92	3.6e-06	0.000528	down	--	--	--	--	--	--
TRINITY_DN199602_c2_g6	0	27.3862	-7.21	3.69e-06	0.000541	down	GO:0016021,integral component of membrane; GO:0005886,plasma membrane; GO:0043447,alkane biosynthetic process; GO:0006723,cuticle hydrocarbon biosynthetic process; GO:0006952,defense response; GO:0009793,embryo development ending in seed dormancy; GO:0006629,lipid metabolic process; GO:0048316,seed development	--	At3g27670	emb|CCF55440.1|	RST1_ARATH, RecName: Full=Protein RST1; AltName: Full=Protein RESURRECTION 1;	A0A287K906_HORVV, SubName: Full=Uncharacterized protein {ECO:0000313|EnsemblPlants:HORVU3Hr1G016630.3};
TRINITY_DN187802_c1_g6	28.2551	0.322256	6.35	3.7e-06	0.000542	up	--	--	YBR054w	gb|AAQ75384.1|	--	Q6W7J3_ORYSI, SubName: Full=Putative opsin {ECO:0000313|EMBL:AAQ75384.1};
TRINITY_DN132063_c0_g1	30.9532	0	7.45	3.71e-06	0.000542	up	--	--	--	--	--	--
TRINITY_DN164755_c1_g1	64.4863	10.4034	2.62	3.74e-06	0.000545	up	GO:0022625,cytosolic large ribosomal subunit; GO:0003723,RNA binding; GO:0019843,rRNA binding; GO:0003735,structural constituent of ribosome; GO:0002181,cytoplasmic translation	K02940: RP-L9e, RPL9; large subunit ribosomal protein L9e	SPAC4G9.16c	ref|XP_002268859.3|	RL9_ORYSJ, RecName: Full=60S ribosomal protein L9;	A0A1D1XJB1_9ARAE, SubName: Full=60S ribosomal protein L9-A {ECO:0000313|EMBL:JAT42371.1};
TRINITY_DN355176_c0_g1	0	30.8925	-7.38	3.77e-06	0.000548	down	--	--	--	--	--	--
TRINITY_DN179626_c2_g3	131.598	39.0204	1.75	3.8e-06	0.000552	up	--	--	--	gb|POE46978.1|	--	F2DLM0_HORVV, SubName: Full=Predicted protein {ECO:0000313|EMBL:BAJ95991.1};
TRINITY_DN183985_c0_g2	31.9597	4.7566	2.76	3.83e-06	0.000554	up	--	--	YOR052c	gb|POE48769.1|	--	L1I7B2_GUITH, SubName: Full=Zink finger-like fusion protein {ECO:0000313|EMBL:EKX31967.1};
TRINITY_DN191233_c2_g1	139.373	60.0541	1.21	3.95e-06	0.000571	up	GO:0005737,cytoplasm; GO:0008936,nicotinamidase activity; GO:0006769,nicotinamide metabolic process; GO:0019365,pyridine nucleotide salvage; GO:0009737,response to abscisic acid	--	At2g22570	ref|XP_003575313.1|	NIC1_ARATH, RecName: Full=Nicotinamidase 1 {ECO:0000305}; Short=AtNIC1 {ECO:0000303|PubMed:17335512}; EC=3.5.1.19 {ECO:0000269|PubMed:17335512}; AltName: Full=Nicotinamide deamidase 1;	I1IBD1_BRADI, SubName: Full=Uncharacterized protein {ECO:0000313|EMBL:KQK00242.1, ECO:0000313|EnsemblPlants:BRADI3G48140.1};
TRINITY_DN178940_c2_g1	0	23.2907	-6.98	3.98e-06	0.000574	down	--	--	--	--	--	--
TRINITY_DN193398_c2_g4	67.1458	0	8.57	4.07e-06	0.000585	up	--	--	--	--	--	--
TRINITY_DN184540_c1_g1	89.8773	27.8175	1.68	4.17e-06	0.000597	up	--	--	--	--	--	--
TRINITY_DN357016_c0_g1	24.4217	0	7.11	4.18e-06	0.000597	up	--	--	--	--	--	--
TRINITY_DN194136_c3_g3	46.5512	0	8.04	4.19e-06	0.000598	up	--	--	--	--	--	--
TRINITY_DN200394_c0_g3	434.455	1071.63	-1.3	4.22e-06	0.000601	down	--	--	--	--	--	--
TRINITY_DN134666_c0_g1	28.4205	0	7.32	4.32e-06	0.000614	up	--	--	--	--	--	--
TRINITY_DN193664_c3_g1	35.2191	0	7.63	4.38e-06	0.000621	up	--	--	--	--	--	--
TRINITY_DN187669_c1_g1	40.9498	2357.4	-5.85	4.39e-06	0.000621	down	--	--	--	--	--	--
TRINITY_DN188447_c0_g1	1884.74	517.042	1.86	4.42e-06	0.000624	up	--	--	--	--	--	--
TRINITY_DN157691_c0_g1	46.2356	6.46208	2.83	4.55e-06	0.00064	up	--	--	--	--	--	--
TRINITY_DN182396_c0_g2	174.39	74.4728	1.22	4.68e-06	0.000655	up	GO:0016021,integral component of membrane; GO:0005886,plasma membrane; GO:0050832,defense response to fungus	K13466: EIX1_2; EIX receptor 1/2	At4g04220	dbj|BAJ94896.1|	EIX2_SOLLC, RecName: Full=Receptor-like protein EIX2 {ECO:0000305}; AltName: Full=EIX receptor 2 {ECO:0000312|EMBL:AAR28378.1}; Flags: Precursor;	A0A287F7W7_HORVV, SubName: Full=Uncharacterized protein {ECO:0000313|EnsemblPlants:HORVU1Hr1G039600.1};
TRINITY_DN195795_c2_g4	0	30.7761	-7.37	4.7e-06	0.000657	down	--	--	--	--	--	--
TRINITY_DN196878_c0_g3	0	37.3564	-7.66	4.73e-06	0.00066	down	--	--	--	--	--	--
TRINITY_DN145059_c0_g1	0.961786	52.9087	-5.74	4.76e-06	0.000662	down	--	--	--	--	--	--
TRINITY_DN158886_c0_g1	27.9379	0.568493	5.49	4.91e-06	0.000682	up	--	--	--	gb|POE85169.1|	--	--
TRINITY_DN187225_c0_g2	40.2243	0	7.83	4.97e-06	0.000689	up	--	--	--	--	--	--
TRINITY_DN170348_c0_g1	54.7774	7.37049	2.84	4.98e-06	0.000689	up	GO:0005618,cell wall; GO:0005829,cytosol; GO:0022626,cytosolic ribosome; GO:0022627,cytosolic small ribosomal subunit; GO:0016020,membrane; GO:0005730,nucleolus; GO:0009506,plasmodesma; GO:0042788,polysomal ribosome; GO:0003729,mRNA binding; GO:0003735,structural constituent of ribosome; GO:0002181,cytoplasmic translation	K02969: RP-S20e, RPS20; small subunit ribosomal protein S20e	SPCC576.09	ref|XP_005645730.1|	RS202_ARATH, RecName: Full=40S ribosomal protein S20-2;	A0A1D1Z5Z1_9ARAE, SubName: Full=40S ribosomal protein S20 {ECO:0000313|EMBL:JAT62305.1};
TRINITY_DN16502_c0_g1	36.2054	0	7.68	4.99e-06	0.000689	up	--	--	--	--	--	--
TRINITY_DN195966_c1_g5	31.866	0	7.49	5.06e-06	0.000697	up	--	--	--	--	--	--
TRINITY_DN198816_c1_g7	39.5559	1259.09	-4.99	5.09e-06	0.0007	down	--	--	--	--	--	--
TRINITY_DN201798_c8_g2	269.33	71.7055	1.91	5.14e-06	0.000705	up	--	--	--	--	--	--
TRINITY_DN260687_c0_g1	0	32.2556	-7.44	5.14e-06	0.000705	down	--	--	--	--	--	--
TRINITY_DN171014_c0_g5	45.0743	9.0957	2.29	5.19e-06	0.00071	up	GO:0005618,cell wall; GO:0009507,chloroplast; GO:0005829,cytosol; GO:0022626,cytosolic ribosome; GO:0022627,cytosolic small ribosomal subunit; GO:0005730,nucleolus; GO:0070181,small ribosomal subunit rRNA binding; GO:0003735,structural constituent of ribosome; GO:0006412,translation	K02953: RP-S13e, RPS13; small subunit ribosomal protein S13e	Hs4506685	ref|XP_013895536.1|	RS131_ARATH, RecName: Full=40S ribosomal protein S13-1;	A0A0D2M5I7_9CHLO, SubName: Full=40S ribosomal protein S13-2 {ECO:0000313|EMBL:KIY96516.1};
TRINITY_DN160345_c0_g2	72.8867	0	8.68	5.27e-06	0.000719	up	--	--	--	--	--	--
TRINITY_DN195713_c2_g1	29.4931	0	7.38	5.34e-06	0.000727	up	--	--	--	--	--	--
TRINITY_DN186238_c0_g1	39.1989	5.87488	2.72	5.4e-06	0.000734	up	--	--	--	--	--	--
TRINITY_DN164194_c0_g2	24.5356	0	7.11	5.5e-06	0.000746	up	--	--	--	--	--	--
TRINITY_DN200149_c2_g5	0	34.4316	-7.54	5.55e-06	0.000751	down	--	--	--	--	--	--
TRINITY_DN200883_c0_g1	0	65.8091	-8.48	5.57e-06	0.000752	down	--	--	--	--	--	--
TRINITY_DN170635_c0_g1	46.5256	13.2651	1.8	5.7e-06	0.000769	up	--	K17265: G3BP1; Ras GTPase-activating protein-binding protein 1 [EC:3.6.4.12 3.6.4.13]	At3g25150	ref|XP_020182025.1|	--	A0A1D5UDR7_WHEAT, SubName: Full=Uncharacterized protein {ECO:0000313|EnsemblPlants:TRIAE_CS42_2BS_TGACv1_147626_AA0485770.1};
TRINITY_DN157207_c0_g1	0.320595	35.0053	-6.6	5.73e-06	0.000771	down	--	--	--	--	--	--
TRINITY_DN200976_c3_g2	106.148	259.037	-1.29	5.75e-06	0.000773	down	--	--	--	--	--	--
TRINITY_DN187424_c0_g1	0.320595	39.2132	-6.77	5.85e-06	0.000784	down	--	--	--	--	--	--
TRINITY_DN175892_c0_g2	421.089	187.913	1.17	6e-06	0.000804	up	--	--	--	--	--	--
TRINITY_DN182801_c0_g2	230.868	69.872	1.73	6.07e-06	0.00081	up	--	--	--	--	--	--
TRINITY_DN180925_c0_g1	41.9684	6.29134	2.7	6.08e-06	0.00081	up	--	--	CE09907	--	--	--
TRINITY_DN175351_c0_g2	0.320595	29.8683	-6.37	6.08e-06	0.00081	down	GO:0000786,nucleosome; GO:0005634,nucleus; GO:0003677,DNA binding; GO:0006334,nucleosome assembly	K11275: H1_5; histone H1/5	Hs4885371	ref|XP_019435473.1|	H11_VOLCA, RecName: Full=Histone H1-I;	D0N486_PHYIT, SubName: Full=Histone H1, putative {ECO:0000313|EMBL:EEY69190.1};
TRINITY_DN188900_c5_g1	21.6468	0	6.93	6.12e-06	0.000812	up	--	--	YKL163w	gb|POE65938.1|	--	A0A0D6QVZ1_ARACU, SubName: Full=Uncharacterized protein {ECO:0000313|EMBL:JAG94709.1};
TRINITY_DN200941_c3_g1	1468.92	3510.95	-1.26	6.18e-06	0.000817	down	--	--	--	--	--	--
TRINITY_DN156084_c0_g1	64.4782	14.7804	2.12	6.19e-06	0.000817	up	GO:0005840,ribosome; GO:0003735,structural constituent of ribosome; GO:0006412,translation	K02960: RP-S16e, RPS16; small subunit ribosomal protein S16e	SPBC18H10.14	ref|XP_002949171.1|	RS16_GOSHI, RecName: Full=40S ribosomal protein S16;	A0A0M0JLJ5_9EUKA, SubName: Full=40s ribosomal protein s16-like protein {ECO:0000313|EMBL:KOO27138.1};
TRINITY_DN192716_c1_g2	29.358	2.53943	3.54	6.38e-06	0.00084	up	--	--	YDR536w	gb|POE76192.1|	--	A0A1D1Z372_9ARAE, SubName: Full=High-affinity glucose transporter {ECO:0000313|EMBL:JAT61299.1}; Flags: Fragment;
TRINITY_DN182011_c1_g2	30.2248	0	7.41	6.39e-06	0.00084	up	--	--	--	--	--	--
TRINITY_DN3069_c0_g1	24.0584	0	7.09	6.4e-06	0.00084	up	--	--	--	--	--	--
TRINITY_DN193675_c0_g1	65.4502	7.65568	3.11	6.41e-06	0.00084	up	--	--	--	--	--	--
TRINITY_DN17157_c0_g1	22.7683	0	7.01	6.53e-06	0.000854	up	--	--	--	--	--	--
TRINITY_DN178978_c0_g3	0	48.8603	-8.05	6.65e-06	0.000867	down	--	--	--	--	--	--
TRINITY_DN186902_c0_g2	21.9315	0	6.95	6.65e-06	0.000867	up	GO:0005634,nucleus; GO:0019005,SCF ubiquitin ligase complex; GO:0010011,auxin binding; GO:0000822,inositol hexakisphosphate binding; GO:0009734,auxin-activated signaling pathway; GO:0016567,protein ubiquitination	--	At4g24390	dbj|BAS81019.1|	FBX14_ARATH, RecName: Full=F-box protein FBX14; AltName: Full=Transport inhibitor response 1-like protein; Short=TIR1-like protein;	A0A0P0VQ14_ORYSJ, SubName: Full=Os02g0759700 protein {ECO:0000313|EMBL:BAS81019.1}; Flags: Fragment;
TRINITY_DN174426_c3_g6	62.9043	11.4086	2.48	7.03e-06	0.000913	up	GO:0005618,cell wall; GO:0022627,cytosolic small ribosomal subunit; GO:0016020,membrane; GO:0009506,plasmodesma; GO:0003729,mRNA binding; GO:0003735,structural constituent of ribosome; GO:0006412,translation	K02981: RP-S2e, RPS2; small subunit ribosomal protein S2e	Hs15055539	dbj|BAJ87044.1|	RS22_ARATH, RecName: Full=40S ribosomal protein S2-2;	F2CW23_HORVV, SubName: Full=Predicted protein {ECO:0000313|EMBL:BAJ87044.1};
TRINITY_DN179171_c0_g3	57.3731	5.87385	3.23	7.04e-06	0.000913	up	--	--	--	--	--	--
TRINITY_DN151783_c0_g1	25.2479	0	7.15	7.04e-06	0.000913	up	--	--	--	--	--	--
TRINITY_DN169222_c0_g1	73.3204	1.06149	6.19	7.17e-06	0.000928	up	--	--	--	--	--	--
TRINITY_DN146110_c1_g1	19.1237	0	6.75	7.26e-06	0.000932	up	--	--	--	--	--	--
TRINITY_DN159557_c1_g1	19.1237	0	6.75	7.26e-06	0.000932	up	--	--	--	--	--	--
TRINITY_DN296530_c0_g1	22.7286	0	7	7.26e-06	0.000932	up	--	--	--	--	--	--
TRINITY_DN174399_c0_g1	31.7141	0	7.49	7.26e-06	0.000932	up	--	--	SPAP8A3.04c	--	--	A0A0D6R811_ARACU, SubName: Full=Uncharacterized protein {ECO:0000313|EMBL:JAG98974.1};
TRINITY_DN188892_c2_g2	172.298	37.9577	2.18	7.3e-06	0.000935	up	GO:0043231,intracellular membrane-bounded organelle; GO:0004519,endonuclease activity; GO:0003723,RNA binding; GO:0008270,zinc ion binding; GO:0009451,RNA modification	K15271: HFM1, MER3; ATP-dependent DNA helicase HFM1/MER3 [EC:3.6.4.12]	At4g02750	ref|XP_003570875.1|	PP301_ARATH, RecName: Full=Pentatricopeptide repeat-containing protein At4g02750;	T1MUU2_TRIUA, SubName: Full=Uncharacterized protein {ECO:0000313|EnsemblPlants:TRIUR3_21743-P1};
TRINITY_DN194083_c0_g1	72.4835	7.42866	3.32	7.35e-06	0.00094	up	--	--	--	ref|XP_011396232.1|	--	--
TRINITY_DN249512_c0_g1	24.9161	0	7.13	7.4e-06	0.000945	up	--	--	--	--	--	--
TRINITY_DN199206_c0_g1	0	38.6466	-7.71	7.49e-06	0.000955	down	--	--	--	--	--	--
TRINITY_DN187907_c2_g1	0	25.2779	-7.09	7.51e-06	0.000956	down	--	--	--	--	--	--
TRINITY_DN172079_c0_g2	46.7193	8.18626	2.49	7.59e-06	0.000964	up	--	--	--	--	--	A0A1D1Y6L3_9ARAE, SubName: Full=UPF0337 protein LJ_0034.1 {ECO:0000313|EMBL:JAT50277.1}; Flags: Fragment;
TRINITY_DN168041_c0_g1	143.83	617.562	-2.1	7.65e-06	0.00097	down	--	--	--	--	--	--
TRINITY_DN176565_c1_g4	48.404	125.132	-1.36	7.96e-06	0.001	down	--	--	--	--	--	--
TRINITY_DN198255_c0_g3	27.5337	0.890749	4.88	8.15e-06	0.00103	up	GO:0009507,chloroplast; GO:0102131,3-oxo-glutaryl-[acp] methyl ester reductase activity; GO:0102132,3-oxo-pimeloyl-[acp] methyl ester reductase activity; GO:0004316,3-oxoacyl-[acyl-carrier-protein] reductase (NADPH) activity; GO:0051287,NAD binding; GO:0006633,fatty acid biosynthetic process	--	SPAC8E11.10	gb|POE99427.1|	FABG3_BRANA, RecName: Full=3-oxoacyl-[acyl-carrier-protein] reductase 3, chloroplastic; EC=1.1.1.100; AltName: Full=3-ketoacyl-acyl carrier protein reductase 3; Flags: Precursor;	F2EAE0_HORVV, SubName: Full=Predicted protein {ECO:0000313|EMBL:BAK04312.1}; Flags: Fragment;
TRINITY_DN137164_c0_g1	0	28.0457	-7.24	8.26e-06	0.00104	down	--	--	--	--	--	--
TRINITY_DN23159_c0_g1	33.2715	0	7.55	8.49e-06	0.00106	up	--	--	--	--	--	--
TRINITY_DN200294_c0_g3	91.6299	29.675	1.61	8.49e-06	0.00106	up	--	--	--	--	--	--
TRINITY_DN199073_c0_g2	151.363	34.2827	2.15	8.53e-06	0.00107	up	--	K00507: SCD, desC; stearoyl-CoA desaturase (Delta-9 desaturase) [EC:1.14.19.1]	SPCC1281.06c_1	dbj|BAJ91418.1|	--	F2D8J7_HORVV, SubName: Full=Predicted protein {ECO:0000313|EMBL:BAJ91418.1};
TRINITY_DN179420_c2_g4	0	44.9952	-7.93	8.59e-06	0.00107	down	--	--	--	--	--	--
TRINITY_DN175025_c7_g4	0	26.2684	-7.15	8.64e-06	0.00108	down	--	--	--	--	--	--
TRINITY_DN175203_c0_g1	37.0545	3.75243	3.3	8.68e-06	0.00108	up	--	--	YGR289c	gb|POE85381.1|	--	A0A0D6QRE2_ARACU, SubName: Full=Uncharacterized protein {ECO:0000313|EMBL:JAG93612.1};
TRINITY_DN164079_c1_g1	0	28.8262	-7.28	8.78e-06	0.00109	down	--	--	--	--	--	--
TRINITY_DN196941_c2_g2	34.4423	2.80488	3.71	8.81e-06	0.00109	up	--	--	--	--	--	--
TRINITY_DN176792_c2_g4	44.5745	0	7.98	8.81e-06	0.00109	up	--	--	--	--	--	--
TRINITY_DN179203_c1_g3	87.0276	20.9192	2.04	8.86e-06	0.00109	up	GO:0005840,ribosome; GO:0003735,structural constituent of ribosome; GO:0006412,translation	K02877: RP-L15e, RPL15; large subunit ribosomal protein L15e	YMR121c	ref|XP_010539086.1|	RL15_PETHY, RecName: Full=60S ribosomal protein L15;	A0A1D1YVP5_9ARAE, RecName: Full=Ribosomal protein L15 {ECO:0000256|RuleBase:RU000663};
TRINITY_DN182894_c1_g6	28.8137	0	7.34	8.96e-06	0.0011	up	--	--	--	--	--	--
TRINITY_DN201426_c0_g3	27.7999	0	7.29	8.98e-06	0.0011	up	--	--	--	--	--	--
TRINITY_DN177181_c0_g1	35.2249	3.20264	3.48	9.04e-06	0.00111	up	--	--	--	--	--	--
TRINITY_DN175867_c0_g3	0	20.2952	-6.78	9.08e-06	0.00111	down	--	--	At5g45540	ref|XP_020163385.1|	--	A0A1D5ULD9_WHEAT, SubName: Full=Uncharacterized protein {ECO:0000313|EnsemblPlants:TRIAE_CS42_2DL_TGACv1_158900_AA0528300.2};
TRINITY_DN194443_c1_g1	22.1004	0	6.96	9.08e-06	0.00111	up	--	--	--	--	--	--
TRINITY_DN172597_c2_g4	78.2702	29.5625	1.41	9.15e-06	0.00112	up	--	--	--	ref|XP_020200283.1|	--	A0A1D5TP24_WHEAT, SubName: Full=Uncharacterized protein {ECO:0000313|EnsemblPlants:TRIAE_CS42_2AS_TGACv1_113575_AA0358140.1};
TRINITY_DN188047_c3_g1	4.71033	35.9897	-2.93	9.2e-06	0.00112	down	--	--	--	--	--	--
TRINITY_DN178321_c0_g1	21.8447	0	6.95	9.22e-06	0.00112	up	--	--	--	--	--	--
TRINITY_DN178845_c6_g1	0	20.561	-6.79	9.22e-06	0.00112	down	GO:0000785,chromatin; GO:0005634,nucleus; GO:0003682,chromatin binding; GO:0003677,DNA binding; GO:0003700,DNA binding transcription factor activity; GO:0030527,structural constituent of chromatin; GO:0006333,chromatin assembly or disassembly	K11295: HMGB2; high mobility group protein B2	7293212	ref|XP_007512709.1|	HMGB1_ARATH, RecName: Full=High mobility group B protein 1; AltName: Full=High mobility group protein A; Short=AtHMGalpha; Short=HMG alpha; AltName: Full=Nucleosome/chromatin assembly factor group D 01; Short=Nucleosome/chromatin assembly factor group D 1;	A0A1D1Z9A5_9ARAE, SubName: Full=High mobility group protein DSP1 {ECO:0000313|EMBL:JAT63447.1}; Flags: Fragment;
TRINITY_DN183120_c0_g3	21.1386	0	6.9	9.27e-06	0.00112	up	--	--	--	--	--	--
TRINITY_DN194781_c4_g1	21.1386	0	6.9	9.27e-06	0.00112	up	--	--	--	--	--	--
TRINITY_DN198392_c4_g1	23.7809	0	7.07	9.31e-06	0.00112	up	--	--	--	--	--	--
TRINITY_DN200940_c3_g4	0	23.7458	-7.01	9.39e-06	0.00113	down	GO:0012505,endomembrane system; GO:0019897,extrinsic component of plasma membrane; GO:0005886,plasma membrane; GO:0043531,ADP binding; GO:0005524,ATP binding; GO:0000166,nucleotide binding; GO:0009626,plant-type hypersensitive response; GO:0007165,signal transduction	K13457: RPM1, RPS3; disease resistance protein RPM1	At3g07040	ref|XP_020148265.1|	RPM1_ARATH, RecName: Full=Disease resistance protein RPM1; AltName: Full=Resistance to Pseudomonas syringae protein 3;	M8BES6_AEGTA, SubName: Full=Disease resistance protein RPM1 {ECO:0000313|EMBL:EMT12200.1, ECO:0000313|EnsemblPlants:EMT12200};
TRINITY_DN201431_c3_g5	973.951	300.043	1.7	9.42e-06	0.00113	up	GO:0016021,integral component of membrane; GO:0005886,plasma membrane; GO:0005774,vacuolar membrane	K12189: VPS25, EAP20; ESCRT-II complex subunit VPS25	At3g50830	ref|XP_004981635.1|	CRPM2_ARATH, RecName: Full=Cold-regulated 413 plasma membrane protein 2; Short=AtCOR413-PM2;	A0A0A9D122_ARUDO, SubName: Full=Uncharacterized protein {ECO:0000313|EMBL:JAD80373.1};
TRINITY_DN195925_c1_g5	38.0472	6.63281	2.53	9.61e-06	0.00116	up	GO:0005840,ribosome; GO:0042254,ribosome biogenesis	K02936: RP-L7Ae, RPL7A; large subunit ribosomal protein L7Ae	SPBC29A3.04	gb|POE74666.1|	RL7A2_ORYSJ, RecName: Full=60S ribosomal protein L7a-2;	A0A1D1XJ61_9ARAE, SubName: Full=60S ribosomal protein L8 {ECO:0000313|EMBL:JAT42437.1}; Flags: Fragment;
TRINITY_DN197629_c2_g2	50.2672	135.541	-1.43	9.71e-06	0.00116	down	--	--	--	--	--	--
TRINITY_DN180486_c0_g6	29.9639	0	7.4	9.74e-06	0.00117	up	--	--	--	--	--	--
TRINITY_DN175686_c1_g3	66.2684	15.1403	2.1	9.75e-06	0.00117	up	GO:0005829,cytosol; GO:0022625,cytosolic large ribosomal subunit; GO:0022626,cytosolic ribosome; GO:0005634,nucleus; GO:0030295,protein kinase activator activity; GO:0003735,structural constituent of ribosome; GO:0002181,cytoplasmic translation; GO:0045860,positive regulation of protein kinase activity; GO:0006414,translational elongation	K02942: RP-LP1, RPLP1; large subunit ribosomal protein LP1	At5g24510	gb|POF10123.1|	RLA12_ARATH, RecName: Full=60S acidic ribosomal protein P1-2;	A0A1D1ZEI4_9ARAE, SubName: Full=60S acidic ribosomal protein P1 {ECO:0000313|EMBL:JAT65346.1};
TRINITY_DN175112_c0_g1	23.7736	81.0684	-1.78	9.84e-06	0.00117	down	GO:0030246,carbohydrate binding	K03188: ureF; urease accessory protein	At2g02350	ref|XP_020164416.1|	P2B12_ARATH, RecName: Full=Putative F-box protein PP2-B12; AltName: Full=Protein PHLOEM PROTEIN 2-LIKE B12; Short=AtPP2-B12;	M8D892_AEGTA, SubName: Full=Uncharacterized protein {ECO:0000313|EMBL:EMT32716.1, ECO:0000313|EnsemblPlants:EMT32716};
TRINITY_DN186244_c4_g4	25.6404	0	7.18	9.88e-06	0.00118	up	--	--	--	gb|POE65725.1|	--	--
TRINITY_DN185976_c1_g1	1.28926	54.9454	-5.38	9.9e-06	0.00118	down	--	--	--	--	--	--
TRINITY_DN176453_c0_g1	0	21.4914	-6.86	9.92e-06	0.00118	down	--	K13457: RPM1, RPS3; disease resistance protein RPM1	--	gb|PNT65329.1|	--	I1HN50_BRADI, SubName: Full=Uncharacterized protein {ECO:0000313|EnsemblPlants:BRADI2G39670.1};
TRINITY_DN190123_c0_g5	31.3732	0	7.47	1.02e-05	0.00121	up	--	--	--	--	--	--
TRINITY_DN176850_c4_g4	29.6868	0.81473	5.03	1.03e-05	0.00122	up	--	--	--	--	--	--
TRINITY_DN183050_c1_g4	70.5236	12.1678	2.55	1.04e-05	0.00123	up	--	--	--	--	--	--
TRINITY_DN172829_c0_g1	48.7537	12.0713	2.03	1.05e-05	0.00123	up	GO:0005739,mitochondrion; GO:0003690,double-stranded DNA binding; GO:0003723,RNA binding; GO:0003697,single-stranded DNA binding; GO:1900864,mitochondrial RNA modification; GO:0009409,response to cold; GO:0006970,response to osmotic stress; GO:0009651,response to salt stress; GO:0009414,response to water deprivation	K12741: HNRNPA1_3; heterogeneous nuclear ribonucleoprotein A1/A3	At3g23830	ref|XP_023516049.1|	RBG4_ARATH, RecName: Full=Glycine-rich RNA-binding protein 4, mitochondrial; Short=AtGR-RBP4; AltName: Full=AtRBG4; AltName: Full=Glycine-rich protein 4; Short=AtGRP4; AltName: Full=Mitochondrial RNA-binding protein 1b; Short=At-mRBP1b; Flags: Precursor;	A0A1J6JRV3_NICAT, SubName: Full=Glycine-rich rna-binding protein 3, mitochondrial {ECO:0000313|EMBL:OIT20474.1};
TRINITY_DN186614_c1_g1	39624.4	14574.3	1.44	1.05e-05	0.00123	up	--	--	--	--	--	--
TRINITY_DN184126_c1_g4	46.6175	0.644512	6.19	1.05e-05	0.00123	up	--	--	--	--	--	--
TRINITY_DN197165_c0_g6	84.1892	0	8.89	1.05e-05	0.00123	up	--	--	--	--	--	--
TRINITY_DN183045_c3_g1	12.9293	192.678	-3.89	1.08e-05	0.00126	down	--	--	--	gb|KQJ87295.1|	--	A0A0Q3EHT9_BRADI, SubName: Full=Uncharacterized protein {ECO:0000313|EMBL:KQJ87295.1};
TRINITY_DN194112_c0_g2	0	38.3463	-7.7	1.09e-05	0.00128	down	--	--	--	--	--	--
TRINITY_DN201722_c1_g1	47.7973	6.04614	3.02	1.1e-05	0.00128	up	--	K13457: RPM1, RPS3; disease resistance protein RPM1	--	ref|XP_014757990.1|	--	I1ISH2_BRADI, SubName: Full=Uncharacterized protein {ECO:0000313|EMBL:KQJ91324.1, ECO:0000313|EnsemblPlants:BRADI4G36976.1};
TRINITY_DN178235_c0_g5	39.3181	0.966768	5.36	1.1e-05	0.00128	up	--	--	--	gb|POE49301.1|	--	--
TRINITY_DN181492_c9_g1	0.324036	47.2138	-7.03	1.1e-05	0.00128	down	--	--	Hs4885421	gb|OTG04810.1|	--	A0A251T134_HELAN, SubName: Full=Putative high mobility group box domain-containing protein {ECO:0000313|EMBL:OTG04810.1};
TRINITY_DN190973_c0_g1	2432.37	476.548	2.35	1.11e-05	0.00129	up	--	--	--	--	--	--
TRINITY_DN183848_c0_g1	191.207	661.748	-1.79	1.12e-05	0.0013	down	--	--	--	--	--	--
TRINITY_DN182563_c2_g1	47.5961	0	8.07	1.13e-05	0.00131	up	--	--	--	--	--	--
TRINITY_DN192458_c0_g6	0	28.1192	-7.25	1.14e-05	0.00132	down	--	--	--	--	--	--
TRINITY_DN191157_c0_g2	391.766	72.0996	2.44	1.15e-05	0.00132	up	GO:0050832,defense response to fungus; GO:0031640,killing of cells of other organism; GO:0044130,negative regulation of growth of symbiont in host; GO:0051841,positive regulation by host of cytolysis of symbiont cells	K04733: IRAK4; interleukin-1 receptor-associated kinase 4 [EC:2.7.11.1]	At4g11650	ref|XP_003559612.2|	ZEAM_MAIZE, RecName: Full=Zeamatin; Flags: Precursor;	I1GPS8_BRADI, SubName: Full=Uncharacterized protein {ECO:0000313|EMBL:KQK13877.1, ECO:0000313|EnsemblPlants:BRADI1G13060.1};
TRINITY_DN186550_c1_g1	0	22.2119	-6.9	1.16e-05	0.00133	down	--	--	--	--	--	--
TRINITY_DN183227_c0_g7	38.629	0	7.77	1.17e-05	0.00134	up	--	--	--	--	--	--
TRINITY_DN171942_c0_g1	36.8833	4.68058	2.98	1.18e-05	0.00135	up	--	--	SPAPB1E7.08c	gb|POE96501.1|	--	--
TRINITY_DN183932_c0_g3	159.654	32.4782	2.29	1.18e-05	0.00135	up	--	--	--	gb|POE72129.1|	--	--
TRINITY_DN174426_c3_g8	20.9972	0	6.89	1.19e-05	0.00135	up	--	--	--	--	--	--
TRINITY_DN197947_c2_g1	18.1168	0	6.68	1.19e-05	0.00135	up	--	--	--	--	--	--
TRINITY_DN175205_c2_g5	49.5844	3.65823	3.79	1.2e-05	0.00136	up	--	--	--	gb|POE72129.1|	--	A0A1D1Y0L1_9ARAE, SubName: Full=Uncharacterized protein {ECO:0000313|EMBL:JAT48180.1};
TRINITY_DN185439_c2_g1	954.1	2003.72	-1.07	1.21e-05	0.00137	down	--	--	--	--	--	--
TRINITY_DN174980_c2_g2	0	53.7547	-8.18	1.22e-05	0.00138	down	--	--	--	--	--	--
TRINITY_DN163811_c0_g1	29.85	0.246237	6.43	1.22e-05	0.00138	up	--	--	--	--	--	--
TRINITY_DN121171_c0_g2	21.6984	0	6.94	1.23e-05	0.00139	up	--	--	--	--	--	--
TRINITY_DN195572_c1_g6	51.6948	3.33494	3.88	1.24e-05	0.0014	up	GO:0005840,ribosome; GO:0003735,structural constituent of ribosome; GO:0006412,translation	K02908: RP-L30e, RPL30; large subunit ribosomal protein L30e	SPAC1250.05	gb|POE93378.1|	RL30_EUPES, RecName: Full=60S ribosomal protein L30;	A0A0D6QRU5_ARACU, SubName: Full=Uncharacterized protein {ECO:0000313|EMBL:JAG93044.1};
TRINITY_DN169128_c0_g1	223.514	49.0204	2.18	1.25e-05	0.00141	up	--	--	--	--	--	--
TRINITY_DN200870_c6_g4	0.320595	42.5287	-6.88	1.27e-05	0.00143	down	--	--	--	--	--	--
TRINITY_DN170348_c0_g2	44.1576	10.48	2.08	1.28e-05	0.00143	up	GO:0005618,cell wall; GO:0005829,cytosol; GO:0022627,cytosolic small ribosomal subunit; GO:0003729,mRNA binding; GO:0003735,structural constituent of ribosome; GO:0002181,cytoplasmic translation	K02969: RP-S20e, RPS20; small subunit ribosomal protein S20e	SPCC576.09	ref|XP_005645730.1|	RS201_ARATH, RecName: Full=40S ribosomal protein S20-1;	A0A1D1Z5Z1_9ARAE, SubName: Full=40S ribosomal protein S20 {ECO:0000313|EMBL:JAT62305.1};
TRINITY_DN191612_c0_g2	51.8198	7.86348	2.68	1.28e-05	0.00144	up	--	--	--	ref|XP_007148147.1|	--	V7BUB6_PHAVU, SubName: Full=Uncharacterized protein {ECO:0000313|EMBL:ESW20141.1};
TRINITY_DN179584_c2_g2	19.2593	454.856	-4.56	1.3e-05	0.00145	down	--	--	--	--	--	--
TRINITY_DN97764_c0_g1	20.6732	0	6.87	1.31e-05	0.00146	up	--	--	--	--	--	--
TRINITY_DN183802_c3_g4	0	26.4771	-7.16	1.31e-05	0.00147	down	--	K13457: RPM1, RPS3; disease resistance protein RPM1	--	ref|XP_014754824.1|	--	I1HM94_BRADI, SubName: Full=Uncharacterized protein {ECO:0000313|EMBL:KQK07706.1, ECO:0000313|EnsemblPlants:BRADI2G37166.1};
TRINITY_DN153422_c0_g3	0	26.9822	-7.19	1.32e-05	0.00147	down	--	--	--	--	--	--
TRINITY_DN192935_c0_g1	29.6987	0	7.39	1.33e-05	0.00148	up	--	--	--	--	--	--
TRINITY_DN196270_c2_g2	91.2937	4.71868	4.25	1.34e-05	0.00149	up	--	--	--	--	--	--
TRINITY_DN190905_c0_g1	332.121	1.25092	8.17	1.34e-05	0.00149	up	--	--	--	--	--	--
TRINITY_DN175865_c0_g2	0.682836	193.071	-8.16	1.36e-05	0.0015	down	--	--	--	--	--	--
TRINITY_DN112078_c0_g1	25.0564	0	7.14	1.37e-05	0.00151	up	--	--	--	--	--	--
TRINITY_DN160850_c1_g1	34.8294	0	7.62	1.38e-05	0.00152	up	--	--	--	--	--	--
TRINITY_DN178978_c1_g1	32.5841	0	7.52	1.38e-05	0.00152	up	--	--	--	gb|POE75557.1|	--	--
TRINITY_DN171562_c1_g2	57.466	7.97846	2.88	1.39e-05	0.00153	up	GO:0005829,cytosol; GO:0022625,cytosolic large ribosomal subunit; GO:0022626,cytosolic ribosome; GO:0005634,nucleus; GO:0005886,plasma membrane; GO:0042788,polysomal ribosome; GO:0005774,vacuolar membrane; GO:0003729,mRNA binding; GO:0003735,structural constituent of ribosome; GO:0009793,embryo development ending in seed dormancy; GO:0009860,pollen tube growth; GO:0006412,translation	K02882: RP-L18Ae, RPL18A; large subunit ribosomal protein L18Ae	YMR242c	dbj|BAK07344.1|	R18A2_ARATH, RecName: Full=60S ribosomal protein L18a-2;	F2EJ22_HORVV, SubName: Full=Predicted protein {ECO:0000313|EMBL:BAK07344.1}; Flags: Fragment;
TRINITY_DN195677_c0_g7	23.9509	0	7.08	1.39e-05	0.00153	up	--	--	--	--	--	--
TRINITY_DN200245_c0_g2	81.4917	1.6679	5.77	1.4e-05	0.00153	up	--	--	--	--	--	--
TRINITY_DN8669_c0_g1	0	33.6107	-7.51	1.4e-05	0.00154	down	--	--	--	--	--	--
TRINITY_DN189721_c0_g6	19.51	0	6.78	1.42e-05	0.00155	up	--	--	--	--	--	--
TRINITY_DN160396_c0_g1	34.7758	0	7.62	1.48e-05	0.00162	up	--	--	--	--	--	--
TRINITY_DN183199_c3_g1	38.0354	0	7.75	1.48e-05	0.00162	up	--	--	--	--	--	--
TRINITY_DN176164_c3_g5	3.74166	32.4818	-3.12	1.5e-05	0.00163	down	GO:0005789,endoplasmic reticulum membrane; GO:0016021,integral component of membrane; GO:0005506,iron ion binding; GO:0016491,oxidoreductase activity; GO:0043447,alkane biosynthetic process; GO:0042742,defense response to bacterium; GO:0050832,defense response to fungus; GO:0008610,lipid biosynthetic process; GO:0006629,lipid metabolic process; GO:0009414,response to water deprivation; GO:0010025…	K15404: K15404, CER1; aldehyde decarbonylase [EC:4.1.99.5]	At1g02190	ref|XP_003575378.1|	CER1_ARATH, RecName: Full=Protein ECERIFERUM 1;	I1IBN9_BRADI, SubName: Full=Uncharacterized protein {ECO:0000313|EMBL:KQK00381.1, ECO:0000313|EnsemblPlants:BRADI3G48997.1};
TRINITY_DN196481_c1_g4	21.325	0	6.91	1.52e-05	0.00165	up	GO:0016021,integral component of membrane; GO:0005886,plasma membrane; GO:0005516,calmodulin binding; GO:0006952,defense response; GO:0009607,response to biotic stimulus	K08472: MLO; mlo protein	At4g02600	ref|XP_003575162.1|	MLO1_ARATH, RecName: Full=MLO-like protein 1; Short=AtMlo1; AltName: Full=MLO protein homolog 1; Short=AtMlo-H1;	I1IAM2_BRADI, RecName: Full=MLO-like protein {ECO:0000256|RuleBase:RU280816};
TRINITY_DN184902_c3_g2	0.724482	36.4829	-5.74	1.53e-05	0.00165	down	--	--	--	--	--	--
TRINITY_DN180768_c0_g1	0.362241	24.8045	-6.11	1.57e-05	0.0017	down	--	--	--	--	--	--
TRINITY_DN195627_c0_g12	298.049	96.6255	1.62	1.57e-05	0.0017	up	--	--	--	--	--	--
TRINITY_DN195632_c1_g4	0	247.614	-10.39	1.6e-05	0.00172	down	--	--	--	ref|XP_010237501.2|	--	I1IJZ5_BRADI, SubName: Full=Uncharacterized protein {ECO:0000313|EMBL:KQJ87594.1, ECO:0000313|EnsemblPlants:BRADI4G12160.1};
TRINITY_DN189630_c0_g4	0	38.2291	-7.69	1.61e-05	0.00173	down	--	--	--	--	--	--
TRINITY_DN198847_c5_g1	423.222	185.348	1.19	1.61e-05	0.00173	up	--	--	--	--	--	--
TRINITY_DN176230_c1_g7	75.496	31.4581	1.26	1.63e-05	0.00175	up	--	--	--	--	--	--
TRINITY_DN172648_c0_g1	33.2628	6.72701	2.29	1.65e-05	0.00177	up	--	--	CE06215	gb|AFK36284.1|	--	I3S7P2_MEDTR, SubName: Full=Uncharacterized protein {ECO:0000313|EMBL:AFK36284.1};
TRINITY_DN177032_c0_g4	30.0572	4.43434	2.77	1.67e-05	0.00179	up	--	K07034: K07034; uncharacterized protein	SPAC5D6.09c	gb|POE65725.1|	--	A0A176VV29_MARPO, SubName: Full=Uncharacterized protein {ECO:0000313|EMBL:OAE24668.1};
TRINITY_DN193157_c0_g2	17.6018	269.876	-3.94	1.7e-05	0.00181	down	--	--	--	--	--	--
TRINITY_DN174583_c3_g4	36.7113	0	7.7	1.72e-05	0.00183	up	--	--	--	--	--	--
TRINITY_DN194611_c0_g3	20.6766	0	6.87	1.74e-05	0.00185	up	--	--	--	--	--	--
TRINITY_DN190639_c3_g2	27.1283	0	7.26	1.76e-05	0.00187	up	--	--	--	--	--	--
TRINITY_DN184181_c4_g2	57.7915	2.86168	4.34	1.77e-05	0.00188	up	--	--	--	--	--	--
TRINITY_DN187475_c4_g1	0	32.9792	-7.48	1.77e-05	0.00188	down	GO:0005737,cytoplasm; GO:0005525,GTP binding; GO:0003924,GTPase activity; GO:0003746,translation elongation factor activity	K03231: EEF1A; elongation factor 1-alpha	7303554	gb|ASZ85176.1|	EF1A_EUGGR, RecName: Full=Elongation factor 1-alpha; Short=EF-1-alpha;	A0A1D1YYY9_9ARAE, RecName: Full=Elongation factor 1-alpha {ECO:0000256|RuleBase:RU000325};
TRINITY_DN193273_c1_g5	0	23.081	-6.96	1.82e-05	0.00192	down	--	--	--	--	--	--
TRINITY_DN172957_c0_g1	40.7091	8.35751	2.3	1.83e-05	0.00192	up	GO:0005618,cell wall; GO:0022626,cytosolic ribosome; GO:0022627,cytosolic small ribosomal subunit; GO:0016020,membrane; GO:0042788,polysomal ribosome; GO:0003735,structural constituent of ribosome; GO:0000462,maturation of SSU-rRNA from tricistronic rRNA transcript (SSU-rRNA, 5.8S rRNA, LSU-rRNA); GO:0006412,translation	K02974: RP-S24e, RPS24; small subunit ribosomal protein S24e	YIL069c	ref|XP_002311621.2|	RS242_ARATH, RecName: Full=40S ribosomal protein S24-2;	B9HJX5_POPTR, RecName: Full=40S ribosomal protein S24 {ECO:0000256|RuleBase:RU004383};
TRINITY_DN189840_c5_g1	0	37.8867	-7.67	1.83e-05	0.00192	down	--	--	--	--	--	--
TRINITY_DN178993_c4_g6	542.533	144.481	1.91	1.84e-05	0.00193	up	GO:0005737,cytoplasm; GO:0005525,GTP binding; GO:0003924,GTPase activity; GO:0003746,translation elongation factor activity	K03231: EEF1A; elongation factor 1-alpha	Hs20539489	gb|AKR14032.1|	EF1A_EUGGR, RecName: Full=Elongation factor 1-alpha; Short=EF-1-alpha;	A0A0K0QNR3_9LAMI, SubName: Full=Translation elongation factor 1-alpha {ECO:0000313|EMBL:AKR14032.1}; Flags: Fragment;
TRINITY_DN183783_c1_g1	18.1099	0	6.68	1.85e-05	0.00195	up	--	--	--	--	--	--
TRINITY_DN182410_c0_g3	2000.37	261.638	2.93	1.91e-05	0.002	up	--	--	--	--	--	--
TRINITY_DN201247_c5_g1	0	35.8157	-7.59	1.93e-05	0.00202	down	--	--	--	--	--	--
TRINITY_DN196259_c1_g1	64.7436	0	8.51	1.93e-05	0.00202	up	--	--	--	--	--	--
TRINITY_DN188939_c2_g3	98.8878	359.92	-1.87	1.94e-05	0.00202	down	GO:0005737,cytoplasm; GO:0005576,extracellular region; GO:0020037,heme binding; GO:0046872,metal ion binding; GO:0004601,peroxidase activity; GO:0042744,hydrogen peroxide catabolic process; GO:0006979,response to oxidative stress; GO:0048511,rhythmic process	K00430: E1.11.1.7; peroxidase [EC:1.11.1.7]	At4g37520	dbj|BAJ85420.1|	PER50_ARATH, RecName: Full=Peroxidase 50; Short=Atperox P50; EC=1.11.1.7; AltName: Full=ATP9a; AltName: Full=PRXR2; Flags: Precursor;	M0VVN8_HORVV, SubName: Full=Uncharacterized protein {ECO:0000313|EnsemblPlants:HORVU2Hr1G063460.3};
TRINITY_DN184257_c1_g5	39.1232	0	7.79	1.95e-05	0.00203	up	--	--	--	--	--	--
TRINITY_DN191131_c1_g4	0	40.4482	-7.77	1.96e-05	0.00204	down	--	--	--	--	--	--
TRINITY_DN157658_c1_g1	24.9056	0	7.14	1.98e-05	0.00205	up	--	--	--	--	--	--
TRINITY_DN177723_c0_g4	0	62.6343	-8.4	2.03e-05	0.00211	down	--	K13457: RPM1, RPS3; disease resistance protein RPM1	--	gb|ACG63541.1|	--	A0A1D5SMN9_WHEAT, SubName: Full=Uncharacterized protein {ECO:0000313|EnsemblPlants:TRIAE_CS42_1BS_TGACv1_050506_AA0172880.1};
TRINITY_DN213859_c0_g1	45.7644	0	8.01	2.05e-05	0.00212	up	--	--	--	--	--	--
TRINITY_DN186344_c0_g4	0	21.1849	-6.85	2.05e-05	0.00212	down	--	--	--	--	--	--
TRINITY_DN338322_c0_g1	21.8998	0	6.95	2.06e-05	0.00212	up	--	--	--	--	--	--
TRINITY_DN200651_c1_g2	25.3346	0	7.16	2.06e-05	0.00212	up	--	--	--	--	--	--
TRINITY_DN186472_c3_g3	23.6452	0.663211	5.23	2.1e-05	0.00216	up	--	K22211: GLX3, HSP31; D-lactate dehydratase [EC:4.2.1.130]	--	ref|XP_005648313.1|	--	A0A024UET8_9STRA, SubName: Full=Uncharacterized protein {ECO:0000313|EMBL:ETW04730.1};
TRINITY_DN176296_c0_g3	98.4602	14.706	2.76	2.22e-05	0.00228	up	--	--	--	--	--	--
TRINITY_DN160214_c0_g2	83.5198	18.0015	2.19	2.23e-05	0.00228	up	--	--	--	--	--	--
TRINITY_DN166199_c1_g2	26.1752	0.644512	5.36	2.24e-05	0.00229	up	--	--	--	--	--	--
TRINITY_DN190251_c3_g4	0	39.8996	-7.76	2.24e-05	0.00229	down	--	--	--	--	--	--
TRINITY_DN193626_c0_g5	79.0145	18.7611	2.06	2.25e-05	0.00229	up	--	--	--	--	--	--
TRINITY_DN190090_c1_g4	21.2135	0	6.9	2.26e-05	0.00229	up	--	--	--	--	--	--
TRINITY_DN169336_c0_g1	22.3155	0.663211	5.14	2.26e-05	0.00229	up	--	--	--	--	--	--
TRINITY_DN49416_c0_g1	0	27.9884	-7.24	2.26e-05	0.00229	down	--	--	--	--	--	--
TRINITY_DN309656_c0_g1	33.5093	0	7.56	2.26e-05	0.00229	up	--	--	--	--	--	--
TRINITY_DN191157_c0_g1	768.338	126.712	2.6	2.32e-05	0.00234	up	GO:0050832,defense response to fungus; GO:0031640,killing of cells of other organism; GO:0044130,negative regulation of growth of symbiont in host; GO:0051841,positive regulation by host of cytolysis of symbiont cells	K04733: IRAK4; interleukin-1 receptor-associated kinase 4 [EC:2.7.11.1]	At4g11650	ref|XP_003561528.1|	ZEAM_MAIZE, RecName: Full=Zeamatin; Flags: Precursor;	A0A0E0KH31_ORYPU, SubName: Full=Uncharacterized protein {ECO:0000313|EnsemblPlants:OPUNC03G25920.1};
TRINITY_DN163954_c0_g1	22.8134	0.322256	6.05	2.32e-05	0.00235	up	--	--	--	--	--	--
TRINITY_DN176654_c1_g3	237.707	87.0136	1.44	2.34e-05	0.00236	up	GO:0005739,mitochondrion; GO:0005524,ATP binding; GO:0005507,copper ion binding; GO:0003723,RNA binding; GO:0003697,single-stranded DNA binding; GO:0016554,cytidine to uridine editing; GO:0080156,mitochondrial mRNA modification; GO:0006397,mRNA processing; GO:0009409,response to cold	K12741: HNRNPA1_3; heterogeneous nuclear ribonucleoprotein A1/A3	At5g61030	ref|XP_003576105.1|	RBG3_ARATH, RecName: Full=Glycine-rich RNA-binding protein 3, mitochondrial; Short=AtGR-RBP3; AltName: Full=AtRBG3; AltName: Full=Mitochondrial RNA-binding protein 2a; Short=At-mRBP2a; AltName: Full=Organelle RRM domain-containing protein 3 {ECO:0000303|PubMed:25800738}; Flags: Precursor;	I1II82_BRADI, SubName: Full=Uncharacterized protein {ECO:0000313|EMBL:KQJ86640.1, ECO:0000313|EnsemblPlants:BRADI4G06840.1};
TRINITY_DN158307_c0_g1	0	25.864	-7.13	2.35e-05	0.00237	down	--	--	--	--	--	--
TRINITY_DN200145_c0_g3	31.3776	0	7.47	2.36e-05	0.00238	up	--	--	--	--	--	--
TRINITY_DN182188_c0_g1	42.4113	8.54747	2.36	2.37e-05	0.00238	up	--	--	--	gb|POF17519.1|	--	--
TRINITY_DN190819_c1_g2	31.9277	0	7.49	2.39e-05	0.0024	up	--	--	--	--	--	--
TRINITY_DN197243_c2_g3	86.3687	23.442	1.89	2.45e-05	0.00245	up	GO:0030170,pyridoxal phosphate binding; GO:0008483,transaminase activity; GO:0009058,biosynthetic process; GO:0042742,defense response to bacterium; GO:0010150,leaf senescence; GO:0009862,systemic acquired resistance, salicylic acid mediated signaling pathway	K10206: E2.6.1.83; LL-diaminopimelate aminotransferase [EC:2.6.1.83]	At2g13810	ref|XP_006649555.1|	ALD1_ORYSJ, RecName: Full=Aminotransferase ALD1 homolog; EC=2.6.1.-;	J3LKY5_ORYBR, SubName: Full=Uncharacterized protein {ECO:0000313|EnsemblPlants:OB03G17110.1};
TRINITY_DN166451_c0_g1	0	29.636	-7.32	2.48e-05	0.00248	down	--	K13338: PEX1; peroxin-1	--	gb|PAN36653.1|	--	K3YFZ2_SETIT, SubName: Full=Uncharacterized protein {ECO:0000313|EMBL:KQL02937.1, ECO:0000313|EnsemblPlants:Si013160m};
TRINITY_DN192048_c1_g2	19.4489	0	6.78	2.49e-05	0.00249	up	--	--	--	--	--	--
TRINITY_DN192657_c7_g2	262.34	68.8548	1.93	2.54e-05	0.00253	up	--	--	--	--	--	--
TRINITY_DN166313_c0_g1	72.8039	165.942	-1.2	2.57e-05	0.00255	down	--	--	At2g45180	ref|XP_003559494.1|	CCDP_MAIZE, RecName: Full=Cortical cell-delineating protein; AltName: Full=Root-specific protein ZRP3; Flags: Precursor;	A0A0D9VY99_9ORYZ, SubName: Full=Uncharacterized protein {ECO:0000313|EnsemblPlants:LPERR03G26750.1};
TRINITY_DN180420_c0_g1	1133.35	2728.23	-1.27	2.58e-05	0.00256	down	GO:0042807,central vacuole; GO:0005887,integral component of plasma membrane; GO:0009705,plant-type vacuole membrane; GO:0015250,water channel activity; GO:0034220,ion transmembrane transport	K09873: TIP; aquaporin TIP	At2g25810	ref|XP_003568717.1|	TIP41_ORYSJ, RecName: Full=Probable aquaporin TIP4-1; AltName: Full=Tonoplast intrinsic protein 4-1; Short=OsTIP4;1;	I1HKS9_BRADI, SubName: Full=Uncharacterized protein {ECO:0000313|EnsemblPlants:BRADI2G31800.1};
TRINITY_DN191435_c0_g1	54.6081	8.9447	2.62	2.58e-05	0.00256	up	--	--	--	--	--	--
TRINITY_DN177034_c0_g1	26.6108	0	7.23	2.6e-05	0.00257	up	GO:0005737,cytoplasm; GO:0005524,ATP binding; GO:0046872,metal ion binding; GO:0004478,methionine adenosyltransferase activity; GO:0006730,one-carbon metabolic process; GO:0006556,S-adenosylmethionine biosynthetic process	K00789: metK; S-adenosylmethionine synthetase [EC:2.5.1.6]	At4g01850	gb|AGF95107.1|	METK2_TOBAC, RecName: Full=S-adenosylmethionine synthase 2; Short=AdoMet synthase 2; EC=2.5.1.6 {ECO:0000250|UniProtKB:Q96551}; AltName: Full=Methionine adenosyltransferase 2; Short=MAT 2;	A0A1J3E296_NOCCA, RecName: Full=S-adenosylmethionine synthase {ECO:0000256|RuleBase:RU000541}; EC=2.5.1.6 {ECO:0000256|RuleBase:RU000541}; Flags: Fragment;
TRINITY_DN187302_c0_g2	22.2693	0.890749	4.57	2.65e-05	0.00262	up	--	--	--	gb|POF06924.1|	--	G4Z2Q3_PHYSP, SubName: Full=Chloroperoxidase {ECO:0000313|EMBL:EGZ22178.1};
TRINITY_DN185841_c0_g2	35.2696	8.45171	2.06	2.65e-05	0.00262	up	--	--	--	--	--	--
TRINITY_DN180945_c0_g1	2.05883	109.635	-5.74	2.69e-05	0.00265	down	--	--	--	--	--	--
TRINITY_DN192657_c7_g1	284.641	67.4698	2.08	2.69e-05	0.00265	up	--	--	--	gb|POE71338.1|	--	K3XC76_PYTUL, SubName: Full=Uncharacterized protein {ECO:0000313|EnsemblProtists:PYU1_T014825};
TRINITY_DN163860_c0_g1	203.301	30.3747	2.75	2.73e-05	0.00268	up	--	--	--	--	--	--
TRINITY_DN197582_c0_g1	150.364	0.909448	7.36	2.74e-05	0.00269	up	--	--	--	--	--	--
TRINITY_DN176931_c0_g3	54.7079	9.51164	2.48	2.75e-05	0.0027	up	GO:0005829,cytosol; GO:0022626,cytosolic ribosome; GO:0022627,cytosolic small ribosomal subunit; GO:0016020,membrane; GO:0003729,mRNA binding; GO:0003723,RNA binding; GO:0003735,structural constituent of ribosome; GO:0000028,ribosomal small subunit assembly	K02947: RP-S10e, RPS10; small subunit ribosomal protein S10e	SPBP22H7.08	gb|POE65899.1|	RS101_ARATH, RecName: Full=40S ribosomal protein S10-1;	A0A1D1YNU3_9ARAE, SubName: Full=40S ribosomal protein S10-B {ECO:0000313|EMBL:JAT56296.1};
TRINITY_DN178928_c0_g1	32.5768	4.01737	3.01	2.8e-05	0.00274	up	--	--	SPBC609.04	gb|POE47527.1|	--	A0A150GE32_GONPE, SubName: Full=Uncharacterized protein {ECO:0000313|EMBL:KXZ48094.1};
TRINITY_DN193601_c3_g3	747.93	1583.52	-1.08	2.81e-05	0.00274	down	--	--	--	--	--	--
TRINITY_DN182915_c0_g1	70.0082	16.0314	2.13	2.84e-05	0.00277	up	--	--	--	--	--	--
TRINITY_DN162588_c0_g1	57.0405	11.5975	2.31	2.85e-05	0.00277	up	--	--	--	--	--	--
TRINITY_DN201696_c1_g2	168.437	43.4118	1.94	2.85e-05	0.00277	up	GO:0016021,integral component of membrane; GO:0005886,plasma membrane; GO:0005524,ATP binding; GO:0004672,protein kinase activity; GO:0004674,protein serine/threonine kinase activity; GO:0042742,defense response to bacterium; GO:0000302,response to reactive oxygen species	K04733: IRAK4; interleukin-1 receptor-associated kinase 4 [EC:2.7.11.1]	At1g11350	gb|PNT61921.1|	CRK7_ARATH, RecName: Full=Cysteine-rich receptor-like protein kinase 7; Short=Cysteine-rich RLK7; EC=2.7.11.-; Flags: Precursor;	A0A0Q3EEH6_BRADI, SubName: Full=Uncharacterized protein {ECO:0000313|EMBL:KQJ84812.1}; Flags: Fragment;
TRINITY_DN175262_c4_g5	0	50.2487	-8.08	2.86e-05	0.00277	down	--	--	--	--	--	--
TRINITY_DN182396_c0_g1	209.3	42.1787	2.3	2.88e-05	0.00278	up	GO:0016021,integral component of membrane; GO:0005886,plasma membrane; GO:0050832,defense response to fungus	--	At5g01890	gb|OQU91665.1|	EIX2_SOLLC, RecName: Full=Receptor-like protein EIX2 {ECO:0000305}; AltName: Full=EIX receptor 2 {ECO:0000312|EMBL:AAR28378.1}; Flags: Precursor;	A0A1Z5S7F2_SORBI, SubName: Full=Uncharacterized protein {ECO:0000313|EMBL:OQU91665.1}; Flags: Fragment;
TRINITY_DN169464_c0_g2	0.320595	52.6119	-7.19	2.89e-05	0.00279	down	--	--	--	--	--	--
TRINITY_DN189284_c1_g1	37.7542	7.69378	2.28	2.91e-05	0.0028	up	GO:0022625,cytosolic large ribosomal subunit; GO:0003723,RNA binding; GO:0003735,structural constituent of ribosome; GO:0000470,maturation of LSU-rRNA; GO:0006412,translation	K02865: RP-L10Ae, RPL10A; large subunit ribosomal protein L10Ae	SPCC1183.08c	gb|POE74774.1|	R10A_ORYSJ, RecName: Full=60S ribosomal protein L10a {ECO:0000303|PubMed:21205822};	A0A1D1ZDQ1_9ARAE, RecName: Full=Ribosomal protein {ECO:0000256|RuleBase:RU000659};
TRINITY_DN176881_c2_g2	0	31.4558	-7.41	2.93e-05	0.00282	down	--	--	--	gb|POE88321.1|	--	A0A1D1Z6L5_9ARAE, SubName: Full=Glucose-repressible gene protein {ECO:0000313|EMBL:JAT62563.1}; Flags: Fragment;
TRINITY_DN162955_c1_g1	61.7844	0	8.45	2.97e-05	0.00285	up	--	--	--	--	--	--
TRINITY_DN227372_c0_g1	121.023	47.5842	1.35	2.97e-05	0.00285	up	--	--	--	--	--	--
TRINITY_DN199577_c3_g2	42.2317	9.36168	2.19	2.98e-05	0.00285	up	--	--	--	--	--	--
TRINITY_DN199721_c0_g6	1165.65	46.8119	4.64	3.04e-05	0.0029	up	--	--	--	--	--	--
TRINITY_DN190535_c2_g1	0	21.4323	-6.85	3.08e-05	0.00294	down	GO:0000786,nucleosome; GO:0005634,nucleus; GO:0003677,DNA binding; GO:0046982,protein heterodimerization activity	K11253: H3; histone H3	Hs17442169	ref|WP_047149380.1|	H32_ENCAL, RecName: Full=Histone H3.2;	J3L8G4_ORYBR, RecName: Full=Histone H3 {ECO:0000256|RuleBase:RU004471};
TRINITY_DN335154_c0_g1	20.9559	0	6.89	3.11e-05	0.00296	up	--	--	--	--	--	--
TRINITY_DN184096_c2_g1	43.4423	12.4696	1.81	3.12e-05	0.00297	up	--	--	--	gb|POF12756.1|	--	A0A1Y1HIN3_KLENI, SubName: Full=Uncharacterized protein {ECO:0000313|EMBL:GAQ78355.1};
TRINITY_DN183691_c1_g3	20.8726	0	6.88	3.14e-05	0.00298	up	--	--	--	--	--	--
TRINITY_DN179891_c1_g2	0	32.7142	-7.47	3.15e-05	0.00298	down	--	--	--	--	--	--
TRINITY_DN179792_c0_g4	0	22.8895	-6.95	3.15e-05	0.00298	down	--	--	--	--	--	--
TRINITY_DN201331_c1_g1	296.056	68.3215	2.13	3.17e-05	0.003	up	--	--	--	--	--	--
TRINITY_DN195415_c4_g1	20.3759	0	6.85	3.22e-05	0.00304	up	--	--	--	--	--	--
TRINITY_DN182950_c1_g2	0.362241	28.6339	-6.31	3.23e-05	0.00305	down	--	--	--	--	--	--
TRINITY_DN178881_c0_g3	6.39659	36.0647	-2.49	3.25e-05	0.00306	down	GO:0005618,cell wall; GO:0005576,extracellular region; GO:0005199,structural constituent of cell wall; GO:0071555,cell wall organization	K13420: FLS2; LRR receptor-like serine/threonine-protein kinase FLS2 [EC:2.7.11.1]	At3g22800	ref|XP_020182223.1|	LRX6_ARATH, RecName: Full=Leucine-rich repeat extensin-like protein 6; Short=AtLRX6; Short=LRR/EXTENSIN6; AltName: Full=Cell wall hydroxyproline-rich glycoprotein; Flags: Precursor;	A0A1D5ZNF4_WHEAT, SubName: Full=Uncharacterized protein {ECO:0000313|EnsemblPlants:TRIAE_CS42_5DL_TGACv1_433633_AA1418100.1};
TRINITY_DN177154_c0_g1	54.427	11.8246	2.2	3.33e-05	0.00313	up	GO:0005634,nucleus; GO:0005840,ribosome; GO:0008097,5S rRNA binding; GO:0003735,structural constituent of ribosome; GO:0006412,translation	K02932: RP-L5e, RPL5; large subunit ribosomal protein L5e	SPBC11C11.09c	gb|ACG27083.1|	RL51_ORYSI, RecName: Full=60S ribosomal protein L5-1;	B6SQF0_MAIZE, SubName: Full=60S ribosomal protein L5-2 {ECO:0000313|EMBL:ACG27083.1};
TRINITY_DN195726_c2_g2	0.644631	21.3951	-5.01	3.4e-05	0.00319	down	--	K15255: PIF1; ATP-dependent DNA helicase PIF1 [EC:3.6.4.12]	At1g35940	ref|XP_020166751.1|	--	A0A1D5UJB3_WHEAT, SubName: Full=Uncharacterized protein {ECO:0000313|EnsemblPlants:TRIAE_CS42_2DL_TGACv1_158434_AA0518650.1};
TRINITY_DN179095_c0_g1	31.7465	84.7606	-1.42	3.41e-05	0.0032	down	--	--	--	gb|OEL17329.1|	--	A0A1E5UWS2_9POAL, SubName: Full=Uncharacterized protein {ECO:0000313|EMBL:OEL17329.1};
TRINITY_DN173210_c0_g1	26.7565	0	7.24	3.49e-05	0.00327	up	--	--	--	--	--	--
TRINITY_DN174324_c0_g8	17.8241	0	6.65	3.51e-05	0.00328	up	--	--	--	gb|POE83356.1|	--	--
TRINITY_DN163038_c0_g3	24.9498	1.45924	4.02	3.51e-05	0.00328	up	--	--	--	--	--	--
TRINITY_DN183118_c2_g2	134.966	51.2784	1.39	3.51e-05	0.00328	up	GO:0016021,integral component of membrane; GO:0005886,plasma membrane; GO:0009506,plasmodesma; GO:0005524,ATP binding; GO:0016301,kinase activity; GO:0004672,protein kinase activity; GO:0033612,receptor serine/threonine kinase binding; GO:0042742,defense response to bacterium; GO:0060548,negative regulation of cell death; GO:0031348,negative regulation of defense response	K04733: IRAK4; interleukin-1 receptor-associated kinase 4 [EC:2.7.11.1]	At5g48380	emb|CDM85405.1|	Y5838_ARATH, RecName: Full=Probably inactive leucine-rich repeat receptor-like protein kinase At5g48380; Flags: Precursor;	A0A1D5V524_WHEAT, SubName: Full=Uncharacterized protein {ECO:0000313|EnsemblPlants:TRIAE_CS42_3AL_TGACv1_193755_AA0619170.1};
TRINITY_DN190799_c1_g2	181.774	531.48	-1.55	3.58e-05	0.00334	down	--	--	--	--	--	--
TRINITY_DN176417_c3_g1	29.4794	3.22134	3.22	3.6e-05	0.00335	up	GO:0005743,mitochondrial inner membrane; GO:0045261,proton-transporting ATP synthase complex, catalytic core F(1); GO:0005524,ATP binding; GO:0046933,proton-transporting ATP synthase activity, rotational mechanism; GO:0015986,ATP synthesis coupled proton transport	K02132: ATPeF1A, ATP5A1, ATP1; F-type H+-transporting ATPase subunit alpha	YBL099w	dbj|BAJ92400.1|	ATPAM_MARPO, RecName: Full=ATP synthase subunit alpha, mitochondrial;	F2DBC9_HORVV, RecName: Full=ATP synthase subunit alpha {ECO:0000256|RuleBase:RU003551};
TRINITY_DN187439_c1_g1	0	33.1618	-7.48	3.62e-05	0.00336	down	--	--	--	--	--	--
TRINITY_DN147773_c0_g1	29.7717	0	7.39	3.62e-05	0.00336	up	--	--	--	--	--	--
TRINITY_DN188545_c2_g2	2.29958	42.6984	-4.19	3.64e-05	0.00337	down	--	K15255: PIF1; ATP-dependent DNA helicase PIF1 [EC:3.6.4.12]	At2g05640	gb|ADB85380.1|	--	A0A1D6CQ13_WHEAT, RecName: Full=ATP-dependent DNA helicase {ECO:0000256|RuleBase:RU363044}; EC=3.6.4.12 {ECO:0000256|RuleBase:RU363044};
TRINITY_DN190535_c2_g2	0	20.9398	-6.82	3.65e-05	0.00338	down	GO:0000786,nucleosome; GO:0005634,nucleus; GO:0003677,DNA binding; GO:0046982,protein heterodimerization activity	K11253: H3; histone H3	Hs4504279	dbj|BAD90809.1|	H3_MARPO, RecName: Full=Histone H3;	Q5DWG7_CONCI, RecName: Full=Histone H3 {ECO:0000256|RuleBase:RU004471};
TRINITY_DN187790_c6_g1	50.6169	118.9	-1.22	3.7e-05	0.00342	down	GO:0020037,heme binding; GO:0005506,iron ion binding; GO:0016710,trans-cinnamate 4-monooxygenase activity	K00487: CYP73A; trans-cinnamate 4-monooxygenase [EC:1.14.13.11]	At2g30490	ref|XP_015692543.1|	TCMO_PETCR, RecName: Full=Trans-cinnamate 4-monooxygenase; EC=1.14.13.11; AltName: Full=Cinnamic acid 4-hydroxylase; Short=C4H; Short=CA4H; AltName: Full=Cytochrome P450 73; AltName: Full=Cytochrome P450C4H;	A0A1D6RU65_WHEAT, SubName: Full=Uncharacterized protein {ECO:0000313|EnsemblPlants:TRIAE_CS42_3DS_TGACv1_271628_AA0904230.1};
TRINITY_DN196809_c0_g1	85.0944	7.01117	3.61	3.73e-05	0.00344	up	--	--	--	--	--	--
TRINITY_DN172179_c0_g1	95.1287	17.9271	2.43	3.77e-05	0.00347	up	GO:0005576,extracellular region; GO:0004867,serine-type endopeptidase inhibitor activity	K08770: UBC; ubiquitin C	--	ref|XP_015622812.1|	IBBWP_MAIZE, RecName: Full=Bowman-Birk type wound-induced proteinase inhibitor WIP1; Flags: Precursor;	A0A0E0BWJ1_9ORYZ, SubName: Full=Uncharacterized protein {ECO:0000313|EnsemblPlants:OMERI01G01530.1};
TRINITY_DN181889_c5_g2	37.3242	5.41981	2.79	3.77e-05	0.00347	up	--	--	--	ref|XP_020171840.1|	--	A0A1D6A6C5_WHEAT, SubName: Full=Uncharacterized protein {ECO:0000313|EnsemblPlants:TRIAE_CS42_6AL_TGACv1_471218_AA1504850.1};
TRINITY_DN179839_c1_g2	22.7867	1.8002	3.62	3.77e-05	0.00347	up	GO:0005840,ribosome; GO:0003735,structural constituent of ribosome; GO:0006412,translation	K02873: RP-L13e, RPL13; large subunit ribosomal protein L13e	SPAC664.05	ref|XP_003612594.2|	RL131_BRANA, RecName: Full=60S ribosomal protein L13-1; AltName: Full=Cold-induced protein C24A;	A0A1D1XXB9_9ARAE, RecName: Full=60S ribosomal protein L13 {ECO:0000256|RuleBase:RU000572}; Flags: Fragment;
TRINITY_DN192260_c0_g1	61.6202	10.1562	2.57	3.85e-05	0.00353	up	--	--	--	--	--	--
TRINITY_DN62164_c0_g1	0	24.961	-7.07	3.86e-05	0.00354	down	--	--	--	--	--	--
TRINITY_DN193506_c0_g1	42.0923	7.97846	2.44	3.86e-05	0.00354	up	--	--	--	gb|POE84805.1|	--	A0A1Y1HTV5_KLENI, SubName: Full=Uncharacterized protein {ECO:0000313|EMBL:GAQ79956.1};
TRINITY_DN198392_c1_g3	28.179	0.246237	6.35	3.91e-05	0.00358	up	--	--	--	--	--	--
TRINITY_DN195391_c0_g6	0.644631	347.148	-9.05	3.96e-05	0.00361	down	--	--	--	--	--	--
TRINITY_DN153277_c0_g2	122.915	24.2187	2.35	3.96e-05	0.00361	up	--	--	--	--	--	--
TRINITY_DN200957_c1_g1	33.8998	0.322256	6.62	4e-05	0.00363	up	--	--	--	--	--	--
TRINITY_DN184809_c2_g2	22.3835	0	6.98	4.01e-05	0.00364	up	--	--	--	--	--	--
TRINITY_DN179092_c2_g1	0	21.9281	-6.88	4.07e-05	0.00369	down	--	--	--	--	--	--
TRINITY_DN169271_c0_g1	36.7328	1.2317	4.89	4.1e-05	0.0037	up	GO:0005829,cytosol; GO:0022626,cytosolic ribosome; GO:0005634,nucleus; GO:0000502,proteasome complex; GO:0019774,proteasome core complex, beta-subunit complex; GO:0004298,threonine-type endopeptidase activity; GO:0051603,proteolysis involved in cellular protein catabolic process; GO:0046686,response to cadmium ion; GO:0009651,response to salt stress	K02736: PSMB4; 20S proteasome subunit beta 7 [EC:3.4.25.1]	Hs4506199	gb|KMS98892.1|	PSB4_ARATH, RecName: Full=Proteasome subunit beta type-4; EC=3.4.25.1; AltName: Full=20S proteasome beta subunit G-1; AltName: Full=Proteasome component H; AltName: Full=Proteasome subunit beta type-7; Flags: Precursor;	A0A1D1YES3_9ARAE, RecName: Full=Proteasome subunit beta type {ECO:0000256|RuleBase:RU004203}; EC=3.4.25.1 {ECO:0000256|RuleBase:RU004203}; Flags: Fragment;
TRINITY_DN171622_c0_g1	41.3686	5.34431	2.99	4.27e-05	0.00385	up	GO:0009507,chloroplast; GO:0022625,cytosolic large ribosomal subunit; GO:0015934,large ribosomal subunit; GO:0005886,plasma membrane; GO:0005774,vacuolar membrane; GO:0005773,vacuole; GO:0003723,RNA binding; GO:0003735,structural constituent of ribosome; GO:0006412,translation	K02883: RP-L18e, RPL18; large subunit ribosomal protein L18e	SPBC11C11.07	dbj|BAJ97000.1|	RL182_ARATH, RecName: Full=60S ribosomal protein L18-2;	F2DPH9_HORVV, SubName: Full=Predicted protein {ECO:0000313|EMBL:BAJ97000.1};
TRINITY_DN95491_c0_g1	23.0328	0.322256	6.06	4.32e-05	0.00389	up	--	--	--	--	--	--
TRINITY_DN189918_c4_g1	41.8466	162.727	-1.96	4.33e-05	0.0039	down	--	--	--	--	--	--
TRINITY_DN174785_c2_g2	309.972	47.8084	2.7	4.47e-05	0.00402	up	--	--	--	gb|POE72129.1|	--	--
TRINITY_DN185174_c0_g2	148.513	25.2421	2.54	4.5e-05	0.00404	up	GO:0032541,cortical endoplasmic reticulum; GO:0005789,endoplasmic reticulum membrane; GO:0016021,integral component of membrane; GO:0005634,nucleus; GO:1990578,perinuclear endoplasmic reticulum membrane; GO:0005886,plasma membrane; GO:0005524,ATP binding; GO:0004674,protein serine/threonine kinase activity; GO:0006952,defense response	K14301: NUP107, NUP84; nuclear pore complex protein Nup107	At5g20480	ref|XP_012702248.1|	XA21_ORYSJ, RecName: Full=Receptor kinase-like protein Xa21 {ECO:0000303|PubMed:22735448}; EC=2.7.11.1 {ECO:0000250|UniProtKB:Q1MX30, ECO:0000255|PROSITE-ProRule:PRU00159}; Contains: RecName: Full=Receptor kinase-like protein Xa21, processed {ECO:0000303|PubMed:22735448}; Flags: Precursor;	A0A0E0HRQ3_ORYNI, SubName: Full=Uncharacterized protein {ECO:0000313|EnsemblPlants:ONIVA06G19970.1};
TRINITY_DN180855_c3_g2	45.952	9.58974	2.29	4.5e-05	0.00404	up	GO:0005618,cell wall; GO:0009507,chloroplast; GO:0016020,membrane; GO:0005886,plasma membrane; GO:0005524,ATP binding; GO:0009408,response to heat; GO:0009615,response to virus	K03283: HSPA1s; heat shock 70kDa protein 1/2/6/8	SPBC1709.05	gb|OMO85626.1|	HSP7E_ARATH, RecName: Full=Heat shock 70 kDa protein 5; AltName: Full=Heat shock protein 70-5; Short=AtHsp70-5; AltName: Full=Heat shock protein 70b;	A0A1D1YEH0_9ARAE, SubName: Full=Heat shock protein sks2 {ECO:0000313|EMBL:JAT53012.1}; Flags: Fragment;
TRINITY_DN124227_c0_g1	18.7825	0	6.73	4.51e-05	0.00404	up	--	--	--	--	--	--
TRINITY_DN172132_c0_g2	71.68	19.9921	1.84	4.53e-05	0.00405	up	GO:0005829,cytosol; GO:0022625,cytosolic large ribosomal subunit; GO:0022626,cytosolic ribosome; GO:0005730,nucleolus; GO:0005886,plasma membrane; GO:0009506,plasmodesma; GO:0042788,polysomal ribosome; GO:0003729,mRNA binding; GO:0003723,RNA binding; GO:0003735,structural constituent of ribosome; GO:0002181,cytoplasmic translation	K02891: RP-L22e, RPL22; large subunit ribosomal protein L22e	SPAC11E3.15	ref|XP_013901683.1|	RL222_ARATH, RecName: Full=60S ribosomal protein L22-2;	A0A1D1YKK6_9ARAE, SubName: Full=60S ribosomal protein L22 {ECO:0000313|EMBL:JAT55150.1}; Flags: Fragment;
TRINITY_DN182725_c0_g1	0	33.3968	-7.49	4.62e-05	0.00412	down	--	K01247: alkA; DNA-3-methyladenine glycosylase II [EC:3.2.2.21]	--	ref|XP_020156683.1|	--	A0A1D5SDD3_WHEAT, SubName: Full=Uncharacterized protein {ECO:0000313|EnsemblPlants:TRIAE_CS42_1BL_TGACv1_031919_AA0122830.1};
TRINITY_DN178011_c5_g1	190.702	40.3872	2.24	4.64e-05	0.00413	up	--	--	--	--	--	--
TRINITY_DN169994_c0_g1	53.1197	8.64115	2.63	4.67e-05	0.00415	up	--	--	YBR054w	gb|POE89991.1|	--	A0A0D6R250_ARACU, SubName: Full=Uncharacterized protein {ECO:0000313|EMBL:JAG96899.1};
TRINITY_DN200247_c1_g2	18.6284	0	6.72	4.68e-05	0.00415	up	--	--	--	--	--	A0A0A9NJ13_ARUDO, SubName: Full=Uncharacterized protein {ECO:0000313|EMBL:JAF08307.1};
TRINITY_DN187252_c1_g4	29.0487	3.96057	2.92	4.69e-05	0.00416	up	--	--	--	--	--	--
TRINITY_DN122484_c0_g1	26.5977	0	7.23	4.71e-05	0.00416	up	--	--	--	--	--	--
TRINITY_DN176989_c0_g1	0	26.7434	-7.17	4.71e-05	0.00416	down	GO:0019904,protein domain specific binding	K06630: YWHAE; 14-3-3 protein epsilon	CE03389	dbj|BAJ95666.1|	14337_SOLLC, RecName: Full=14-3-3 protein 7;	A0A1D1YYN0_9ARAE, SubName: Full=14-3-3 protein zeta {ECO:0000313|EMBL:JAT59744.1};
TRINITY_DN196733_c0_g7	34.304	90.3168	-1.39	4.72e-05	0.00416	down	--	--	--	--	--	--
TRINITY_DN77027_c0_g1	0	25.9025	-7.13	4.76e-05	0.00419	down	--	--	--	--	--	--
TRINITY_DN189015_c4_g2	3364.22	1598.25	1.07	4.78e-05	0.0042	up	--	--	--	--	--	--
TRINITY_DN295384_c0_g1	21.4496	0	6.92	4.81e-05	0.00422	up	--	--	--	--	--	--
TRINITY_DN182099_c0_g2	0	20.8666	-6.81	4.82e-05	0.00422	down	--	--	--	--	--	--
TRINITY_DN201625_c2_g4	24.0426	0	7.08	4.82e-05	0.00422	up	--	--	--	--	--	--
TRINITY_DN180425_c1_g3	24.1742	0	7.09	4.87e-05	0.00426	up	--	--	--	--	--	--
TRINITY_DN177338_c0_g2	22.4684	2.14167	3.51	4.88e-05	0.00426	up	GO:0005759,mitochondrial matrix; GO:0005739,mitochondrion; GO:0051537,2 iron, 2 sulfur cluster binding; GO:0051539,4 iron, 4 sulfur cluster binding; GO:0008198,ferrous iron binding; GO:0036455,iron-sulfur transferase activity; GO:0005198,structural molecule activity; GO:0006879,cellular iron ion homeostasis; GO:0016226,iron-sulfur cluster assembly; GO:0097428,protein maturation by iron-sulfur clu…	K22068: ISCU; iron-sulfur cluster assembly enzyme ISCU, mitochondrial	YPL135w	gb|POE93583.1|	ISU1_ARATH, RecName: Full=Iron-sulfur cluster assembly protein 1; Short=AtISU1; Short=Protein ISCU-LIKE 1; AltName: Full=NifU-like N-terminal domain-containing protein ISU1; AltName: Full=NifU-like protein ISU1; Flags: Precursor;	A0A1D1Z901_9ARAE, RecName: Full=Iron-sulfur cluster assembly protein {ECO:0000256|RuleBase:RU362089};
TRINITY_DN195702_c0_g1	30.4294	78.281	-1.37	5.03e-05	0.00437	down	--	--	--	--	--	--
TRINITY_DN176098_c3_g5	44.5337	8.24306	2.4	5.07e-05	0.0044	up	GO:0005524,ATP binding; GO:0046872,metal ion binding; GO:0004550,nucleoside diphosphate kinase activity; GO:0006241,CTP biosynthetic process; GO:0006183,GTP biosynthetic process; GO:0006228,UTP biosynthetic process	K00940: ndk, NME; nucleoside-diphosphate kinase [EC:2.7.4.6]	7302087	gb|POE72870.1|	NDK1_TOBAC, RecName: Full=Nucleoside diphosphate kinase 1; EC=2.7.4.6; AltName: Full=Nucleoside diphosphate kinase I; Short=NDK I; Short=NDP kinase I; Short=NDPK I;	W4G4A4_9STRA, RecName: Full=Nucleoside diphosphate kinase {ECO:0000256|RuleBase:RU004013}; EC=2.7.4.6 {ECO:0000256|RuleBase:RU004013};
TRINITY_DN175122_c2_g3	22.3847	86.7599	-1.95	5.07e-05	0.0044	down	GO:0005576,extracellular region; GO:0009505,plant-type cell wall; GO:0009506,plasmodesma; GO:0020037,heme binding; GO:0046872,metal ion binding; GO:0004601,peroxidase activity; GO:0042744,hydrogen peroxide catabolic process; GO:0009664,plant-type cell wall organization; GO:0006979,response to oxidative stress	K00430: E1.11.1.7; peroxidase [EC:1.11.1.7]	At1g71695	emb|CDM85955.1|	PER1_SORBI, RecName: Full=Cationic peroxidase SPC4; EC=1.11.1.7; Flags: Precursor;	A0A0A9RE75_ARUDO, SubName: Full=PER1 {ECO:0000313|EMBL:JAF44300.1};
TRINITY_DN176811_c1_g7	4.28544	170.577	-5.31	5.14e-05	0.00446	down	--	--	--	--	--	--
TRINITY_DN15521_c0_g1	18.3078	0	6.69	5.16e-05	0.00446	up	--	--	--	--	--	--
TRINITY_DN178250_c5_g3	146.047	43.7594	1.74	5.16e-05	0.00446	up	--	--	--	--	--	--
TRINITY_DN177873_c1_g2	87.2154	294.7	-1.76	5.18e-05	0.00447	down	--	--	--	--	--	--
TRINITY_DN190638_c0_g2	9.02365	42.6343	-2.25	5.18e-05	0.00447	down	GO:0005829,cytosol; GO:0005634,nucleus; GO:0042802,identical protein binding; GO:0071472,cellular response to salt stress; GO:0016567,protein ubiquitination; GO:0031396,regulation of protein ubiquitination; GO:0006970,response to osmotic stress	K10523: SPOP; speckle-type POZ protein	At2g39760	ref|XP_020186852.1|	BPM3_ARATH, RecName: Full=BTB/POZ and MATH domain-containing protein 3; AltName: Full=Protein BTB-POZ AND MATH DOMAIN 3; Short=AtBPM3;	A0A1D5S988_WHEAT, SubName: Full=Uncharacterized protein {ECO:0000313|EnsemblPlants:TRIAE_CS42_1BL_TGACv1_030869_AA0102660.1};
TRINITY_DN186324_c2_g1	35.1543	1.97041	4.08	5.21e-05	0.00449	up	GO:0031225,anchored component of membrane; GO:0046658,anchored component of plasma membrane; GO:0005576,extracellular region; GO:0009505,plant-type cell wall; GO:0005886,plasma membrane; GO:0042973,glucan endo-1,3-beta-D-glucosidase activity; GO:0004553,hydrolase activity, hydrolyzing O-glycosyl compounds; GO:0030247,polysaccharide binding; GO:0005975,carbohydrate metabolic process; GO:0071555,ce…	K19891: GN1_2_3; glucan endo-1,3-beta-glucosidase 1/2/3 [EC:3.2.1.39]	At4g26830	dbj|BAJ90025.1|	E1313_ARATH, RecName: Full=Glucan endo-1,3-beta-glucosidase 13; EC=3.2.1.39; AltName: Full=(1->3)-beta-glucan endohydrolase 13; Short=(1->3)-beta-glucanase 13; AltName: Full=Beta-1,3-endoglucanase 13; Short=Beta-1,3-glucanase 13; Flags: Precursor;	A0A287XAX6_HORVV, SubName: Full=Uncharacterized protein {ECO:0000313|EnsemblPlants:HORVU7Hr1G091100.10};
TRINITY_DN182785_c0_g1	64.5198	262.377	-2.02	5.23e-05	0.0045	down	GO:0102229,amylopectin maltohydrolase activity; GO:0016161,beta-amylase activity; GO:0000272,polysaccharide catabolic process	K01177: E3.2.1.2; beta-amylase [EC:3.2.1.2]	At4g15210	dbj|BAK00030.1|	AMYB_MEDSA, RecName: Full=Beta-amylase; EC=3.2.1.2; AltName: Full=1,4-alpha-D-glucan maltohydrolase;	M8CT92_AEGTA, RecName: Full=Beta-amylase {ECO:0000256|RuleBase:RU000509}; EC=3.2.1.2 {ECO:0000256|RuleBase:RU000509};
TRINITY_DN276806_c0_g1	38.6924	0	7.77	5.24e-05	0.0045	up	--	--	--	--	--	--
TRINITY_DN176814_c0_g2	22.4684	3.27866	2.81	5.3e-05	0.00455	up	GO:0005759,mitochondrial matrix; GO:0004029,aldehyde dehydrogenase (NAD) activity	K00128: ALDH; aldehyde dehydrogenase (NAD+) [EC:1.2.1.3]	SPAC9E9.09c	gb|AUF72246.1|	AL2B7_ARATH, RecName: Full=Aldehyde dehydrogenase family 2 member B7, mitochondrial; Short=ALDH2b; EC=1.2.1.3; Flags: Precursor;	A0A2H4Z9U8_9BRYO, SubName: Full=Aldehyde dehydrogenase 2B2 {ECO:0000313|EMBL:AUF72246.1};
TRINITY_DN189372_c2_g4	0	23.9354	-7.02	5.34e-05	0.00458	down	--	--	--	--	--	--
TRINITY_DN187459_c2_g2	21.1619	177.444	-3.07	5.4e-05	0.00462	down	--	--	--	--	--	--
TRINITY_DN166781_c0_g2	19.0752	1.2317	3.93	5.41e-05	0.00463	up	--	--	--	--	--	--
TRINITY_DN190159_c3_g2	1322.06	2835.63	-1.1	5.42e-05	0.00463	down	--	--	--	--	--	--
TRINITY_DN192657_c8_g1	19.5868	0	6.79	5.44e-05	0.00464	up	--	--	--	--	--	--
TRINITY_DN151619_c0_g2	23.309	0	7.04	5.45e-05	0.00464	up	--	--	--	--	--	--
TRINITY_DN166032_c0_g1	29.056	0.738711	5.06	5.52e-05	0.00469	up	GO:0005758,mitochondrial intermembrane space; GO:0005747,mitochondrial respiratory chain complex I; GO:0005739,mitochondrion; GO:0032981,mitochondrial respiratory chain complex I assembly; GO:0055114,oxidation-reduction process	K03938: NDUFS5; NADH dehydrogenase (ubiquinone) Fe-S protein 5	At3g62790	ref|XP_020101742.1|	NDS5B_ARATH, RecName: Full=NADH dehydrogenase [ubiquinone] iron-sulfur protein 5-B;	R7QEA4_CHOCR, SubName: Full=Uncharacterized protein {ECO:0000313|EMBL:CDF36404.1};
TRINITY_DN190535_c2_g3	0	45.4725	-7.94	5.52e-05	0.00469	down	GO:0000786,nucleosome; GO:0005634,nucleus; GO:0003677,DNA binding; GO:0046982,protein heterodimerization activity	K11253: H3; histone H3	Hs4504279	dbj|BAD90809.1|	H32_ENCAL, RecName: Full=Histone H3.2;	A0A1D1ZDV0_9ARAE, RecName: Full=Histone H3 {ECO:0000256|RuleBase:RU004471};
TRINITY_DN188776_c0_g1	37.4572	3.94083	3.18	5.55e-05	0.00471	up	--	--	--	--	--	--
TRINITY_DN176881_c2_g5	52.8065	1.38374	5.31	5.74e-05	0.00486	up	--	--	--	--	--	A0A1D1Z6L5_9ARAE, SubName: Full=Glucose-repressible gene protein {ECO:0000313|EMBL:JAT62563.1}; Flags: Fragment;
TRINITY_DN171298_c0_g6	22.8918	0	7.01	5.83e-05	0.00493	up	--	--	--	ref|XP_005647888.1|	--	I0YY75_COCSC, SubName: Full=Uncharacterized protein {ECO:0000313|EMBL:EIE23344.1};
TRINITY_DN178108_c2_g1	20.8375	0.890749	4.48	5.88e-05	0.00497	up	--	--	YKL163w	gb|POE65938.1|	--	A0A0D6QVZ1_ARACU, SubName: Full=Uncharacterized protein {ECO:0000313|EMBL:JAG94709.1};
TRINITY_DN179810_c2_g7	93.3162	1.93354	5.59	5.9e-05	0.00498	up	--	--	--	gb|POE72129.1|	--	A0A1D1Y0L1_9ARAE, SubName: Full=Uncharacterized protein {ECO:0000313|EMBL:JAT48180.1};
TRINITY_DN183089_c1_g2	26.1684	2.19795	3.46	6.16e-05	0.00519	up	--	--	--	--	--	--
TRINITY_DN173277_c6_g3	0.320595	26.4918	-6.2	6.18e-05	0.0052	down	GO:0005737,cytoplasm; GO:0005634,nucleus; GO:0006511,ubiquitin-dependent protein catabolic process	K08770: UBC; ubiquitin C	SPBC337.08c	ref|XP_001227036.1|	UBQ4_ARATH, RecName: Full=Polyubiquitin 4; Contains: RecName: Full=Ubiquitin; Flags: Precursor;	A0A1Q9DY17_SYMMI, SubName: Full=Polyubiquitin {ECO:0000313|EMBL:OLQ00019.1};
TRINITY_DN177417_c0_g1	84.7738	18.1715	2.21	6.2e-05	0.00521	up	--	--	--	--	--	--
TRINITY_DN173307_c2_g2	0	25.409	-7.11	6.26e-05	0.00525	down	--	--	--	--	--	--
TRINITY_DN187492_c3_g1	182.781	57.5561	1.67	6.3e-05	0.00528	up	--	--	YPR149w	gb|POF01334.1|	--	--
TRINITY_DN187269_c1_g2	18.5834	0	6.71	6.35e-05	0.00532	up	--	--	--	--	--	--
TRINITY_DN191141_c0_g1	46.7842	9.98645	2.21	6.37e-05	0.00532	up	--	--	--	--	--	--
TRINITY_DN176458_c2_g3	359.891	139.665	1.36	6.38e-05	0.00533	up	GO:0009507,chloroplast; GO:0005759,mitochondrial matrix; GO:0005739,mitochondrion; GO:0004029,aldehyde dehydrogenase (NAD) activity; GO:0005524,ATP binding; GO:0046686,response to cadmium ion	K00128: ALDH; aldehyde dehydrogenase (NAD+) [EC:1.2.1.3]	YER073w	gb|AUF72237.1|	AL2B4_ARATH, RecName: Full=Aldehyde dehydrogenase family 2 member B4, mitochondrial; Short=ALDH2a; EC=1.2.1.3; Flags: Precursor;	A0A2H4Z9T8_9BRYO, SubName: Full=Aldehyde dehydrogenase 2F1 {ECO:0000313|EMBL:AUF72237.1};
TRINITY_DN171716_c2_g3	31.8056	0.73923	5.58	6.46e-05	0.00539	up	--	K02429: fucP; MFS transporter, FHS family, L-fucose permease	--	ref|XP_001751264.1|	--	A9RB56_PHYPA, SubName: Full=Uncharacterized protein {ECO:0000313|EMBL:EDQ83581.1};
TRINITY_DN170959_c5_g1	17.9239	168.457	-3.23	6.54e-05	0.00545	down	--	--	--	gb|POF20118.1|	--	--
TRINITY_DN192488_c0_g2	27.4833	3.86585	2.85	6.56e-05	0.00546	up	--	--	SPAC637.13c	gb|POE96979.1|	--	--
TRINITY_DN192997_c1_g3	87.1383	29.8061	1.53	6.59e-05	0.00548	up	GO:0005886,plasma membrane; GO:0043531,ADP binding; GO:0005524,ATP binding; GO:0009626,plant-type hypersensitive response; GO:0007165,signal transduction	K13457: RPM1, RPS3; disease resistance protein RPM1	At3g46730	ref|XP_020148590.1|	R13L3_ARATH, RecName: Full=Putative disease resistance RPP13-like protein 3;	A0A1D6BST3_WHEAT, SubName: Full=Uncharacterized protein {ECO:0000313|EnsemblPlants:TRIAE_CS42_7AS_TGACv1_569235_AA1811030.1};
TRINITY_DN198738_c1_g3	23.3491	2.9564	3.02	6.69e-05	0.00556	up	GO:0005840,ribosome; GO:0003735,structural constituent of ribosome; GO:0006412,translation	K02866: RP-L10e, RPL10; large subunit ribosomal protein L10e	SPBC18E5.04	gb|POE93376.1|	RL10_PINTA, RecName: Full=60S ribosomal protein L10; AltName: Full=Wilms tumor suppressor homolog;	A0A1D1YCV8_9ARAE, SubName: Full=60S ribosomal protein L10 {ECO:0000313|EMBL:JAT52468.1};
TRINITY_DN185831_c4_g1	40.0354	0	7.82	6.92e-05	0.00574	up	--	--	--	--	--	--
TRINITY_DN241733_c0_g1	18.5135	0	6.71	7.1e-05	0.00588	up	--	--	--	--	--	--
TRINITY_DN199317_c0_g2	1.69315	23.9317	-3.84	7.11e-05	0.00588	down	--	K06955: K06955; uncharacterized protein	At3g04650	ref|XP_003560053.1|	--	I1GT55_BRADI, SubName: Full=Uncharacterized protein {ECO:0000313|EMBL:KQK15590.1, ECO:0000313|EnsemblPlants:BRADI1G23880.1};
TRINITY_DN193944_c4_g3	1.773	159.713	-6.51	7.17e-05	0.00592	down	--	--	--	--	--	--
TRINITY_DN198057_c0_g2	67.5248	14.5534	2.22	7.35e-05	0.00606	up	--	K00507: SCD, desC; stearoyl-CoA desaturase (Delta-9 desaturase) [EC:1.14.19.1]	SPCC1281.06c_1	dbj|BAJ91418.1|	--	F2D8J7_HORVV, SubName: Full=Predicted protein {ECO:0000313|EMBL:BAJ91418.1};
TRINITY_DN190412_c1_g5	25.7087	72.2236	-1.48	7.39e-05	0.00608	down	--	--	--	--	--	--
TRINITY_DN188447_c0_g2	3673.7	1070.08	1.78	7.52e-05	0.00618	up	--	--	--	--	--	--
TRINITY_DN166781_c0_g1	21.928	0.909448	4.56	7.55e-05	0.00619	up	--	--	--	--	--	--
TRINITY_DN174153_c4_g3	28.7408	3.69563	3.01	7.55e-05	0.00619	up	GO:0000786,nucleosome; GO:0005634,nucleus; GO:0003677,DNA binding; GO:0046982,protein heterodimerization activity; GO:0006334,nucleosome assembly	K11254: H4; histone H4	CE07287	gb|OTG05123.1|	H42_WHEAT, RecName: Full=Histone H4 variant TH091;	A0A1D1YII8_9ARAE, RecName: Full=Histone H4 {ECO:0000256|RuleBase:RU000528};
TRINITY_DN173596_c0_g1	253.385	47.646	2.41	7.59e-05	0.00622	up	--	--	--	--	--	--
TRINITY_DN198634_c0_g2	20.5047	92.5287	-2.17	7.69e-05	0.00628	down	GO:0016021,integral component of membrane; GO:0008810,cellulase activity; GO:0071555,cell wall organization; GO:0030245,cellulose catabolic process	K01179: E3.2.1.4; endoglucanase [EC:3.2.1.4]	At5g49720	ref|XP_003560035.1|	GUN10_ORYSJ, RecName: Full=Endoglucanase 10; EC=3.2.1.4; AltName: Full=Endo-1,4-beta glucanase 10; AltName: Full=OsGLU2;	I1GNK7_BRADI, RecName: Full=Endoglucanase {ECO:0000256|RuleBase:RU361166}; EC=3.2.1.4 {ECO:0000256|RuleBase:RU361166};
TRINITY_DN164079_c1_g4	0	31.6324	-7.41	7.69e-05	0.00628	down	--	--	--	--	--	--
TRINITY_DN183052_c2_g1	30.8971	6.55732	2.27	7.81e-05	0.00637	up	GO:0005618,cell wall; GO:0042807,central vacuole; GO:0009507,chloroplast; GO:0009941,chloroplast envelope; GO:0005794,Golgi apparatus; GO:0005887,integral component of plasma membrane; GO:0009505,plant-type cell wall; GO:0009705,plant-type vacuole membrane; GO:0005886,plasma membrane; GO:0009506,plasmodesma; GO:0000326,protein storage vacuole; GO:0005774,vacuolar membrane; GO:0005773,vacuole; GO:…	K09872: PIP; aquaporin PIP	YPR192w	gb|POE93374.1|	TIP21_ARATH, RecName: Full=Aquaporin TIP2-1; AltName: Full=Delta-tonoplast intrinsic protein; Short=Delta-TIP; AltName: Full=Tonoplast intrinsic protein 2-1; Short=AtTIP2;1; Contains: RecName: Full=Aquaporin TIP2-1, N-terminally processed;	A0A1D1XR95_9ARAE, SubName: Full=Aquaporin TIP2-3 {ECO:0000313|EMBL:JAT44915.1};
TRINITY_DN175123_c0_g2	33.5245	7.06849	2.27	7.84e-05	0.00639	up	GO:0005737,cytoplasm; GO:0005730,nucleolus; GO:0003700,DNA binding transcription factor activity; GO:0043565,sequence-specific DNA binding; GO:0003713,transcription coactivator activity; GO:0009873,ethylene-activated signaling pathway; GO:0045893,positive regulation of transcription, DNA-templated; GO:0009737,response to abscisic acid; GO:0009408,response to heat; GO:0009414,response to water dep…	K03627: MBF1; putative transcription factor	SPBC83.17	dbj|GAV79506.1|	MBF1C_ARATH, RecName: Full=Multiprotein-bridging factor 1c;	A0A1D1XGC2_9ARAE, SubName: Full=Multiprotein-bridging factor 1 {ECO:0000313|EMBL:JAT41452.1}; Flags: Fragment;
TRINITY_DN188789_c4_g3	319.437	144.446	1.15	7.89e-05	0.00642	up	GO:0043231,intracellular membrane-bounded organelle; GO:0015020,glucuronosyltransferase activity; GO:0080043,quercetin 3-O-glucosyltransferase activity; GO:0080044,quercetin 7-O-glucosyltransferase activity; GO:0008152,metabolic process	K21374: UGT85A; 7-deoxyloganetin glucosyltransferase [EC:2.4.1.324]	At1g22370	ref|XP_020176415.1|	U85A5_ARATH, RecName: Full=UDP-glycosyltransferase 85A5; EC=2.4.1.-;	A0A287I9M8_HORVV, SubName: Full=Uncharacterized protein {ECO:0000313|EnsemblPlants:HORVU2Hr1G066790.2};
TRINITY_DN187634_c1_g1	23.9467	0	7.08	7.9e-05	0.00643	up	--	--	--	--	--	--
TRINITY_DN165671_c0_g1	57.4614	15.8045	1.86	7.93e-05	0.00644	up	GO:0022625,cytosolic large ribosomal subunit; GO:0022626,cytosolic ribosome; GO:0016020,membrane; GO:0003735,structural constituent of ribosome; GO:0002181,cytoplasmic translation; GO:0042273,ribosomal large subunit biogenesis	K02917: RP-L35Ae, RPL35A; large subunit ribosomal protein L35Ae	YOR234c	ref|XP_017219693.1|	R35A4_ARATH, RecName: Full=60S ribosomal protein L35a-4;	A0A1D1XY21_9ARAE, SubName: Full=60S ribosomal protein L35a-2 {ECO:0000313|EMBL:JAT47277.1}; Flags: Fragment;
TRINITY_DN178462_c1_g2	0	128.814	-9.44	7.94e-05	0.00644	down	--	--	--	--	--	--
TRINITY_DN184902_c1_g1	0	31.0659	-7.39	8.03e-05	0.0065	down	--	--	--	--	--	--
TRINITY_DN201643_c1_g3	25.6839	0	7.18	8.04e-05	0.00651	up	--	--	--	--	--	--
TRINITY_DN173277_c6_g5	221.811	45.8158	2.27	8.21e-05	0.00663	up	--	--	--	--	--	--
TRINITY_DN194511_c8_g1	0	20.6545	-6.81	8.22e-05	0.00663	down	--	--	--	--	--	--
TRINITY_DN175389_c3_g3	299.32	10.3859	4.87	8.24e-05	0.00664	up	GO:0005737,cytoplasm; GO:0005634,nucleus	K08770: UBC; ubiquitin C	At4g05050	ref|XP_020195534.1|	UBIQP_HORVU, RecName: Full=Polyubiquitin; Contains: RecName: Full=Ubiquitin; Flags: Precursor; Fragment;	A0A1D6BGA2_WHEAT, SubName: Full=Uncharacterized protein {ECO:0000313|EnsemblPlants:TRIAE_CS42_6DS_TGACv1_544009_AA1745960.2};
TRINITY_DN189004_c0_g1	45.4469	10.9714	2.02	8.32e-05	0.0067	up	--	--	--	--	--	--
TRINITY_DN178295_c2_g2	19.4362	218.709	-3.5	8.33e-05	0.0067	down	--	--	--	--	--	--
TRINITY_DN199419_c4_g1	0	33.416	-7.49	8.43e-05	0.00677	down	--	--	--	--	--	--
TRINITY_DN188897_c0_g1	35.022	8.8692	2.01	8.49e-05	0.00681	up	GO:0031428,box C/D snoRNP complex; GO:0015030,Cajal body; GO:0016592,mediator complex; GO:0005730,nucleolus; GO:0032040,small-subunit processome; GO:1990259,histone-glutamine methyltransferase activity; GO:0004540,ribonuclease activity; GO:0003723,RNA binding; GO:0008649,rRNA methyltransferase activity; GO:0030515,snoRNA binding; GO:0000494,box C/D snoRNA 3'-end processing; GO:1990258,histone glu…	K14563: NOP1, FBL; rRNA 2'-O-methyltransferase fibrillarin [EC:2.1.1.-]	At4g25630	dbj|BAK06507.1|	MD36A_ARATH, RecName: Full=Mediator of RNA polymerase II transcription subunit 36a; AltName: Full=Fibrillarin-like protein 2; AltName: Full=Histone-glutamine methyltransferase; AltName: Full=rRNA 2'-O-methyltransferase fibrillarin 2; EC=2.1.1.-;	F2EGN5_HORVV, SubName: Full=Predicted protein {ECO:0000313|EMBL:BAK06507.1};
TRINITY_DN186818_c0_g2	0	38.5702	-7.7	8.62e-05	0.00689	down	--	--	--	--	--	--
TRINITY_DN161655_c0_g2	23.5646	0	7.05	8.71e-05	0.00696	up	--	--	--	--	--	--
TRINITY_DN198878_c0_g4	0	37.8822	-7.68	8.84e-05	0.00705	down	--	--	--	--	--	--
TRINITY_DN188062_c1_g1	18.2246	65.9118	-1.85	8.97e-05	0.00715	down	--	--	--	gb|EMS52472.1|	--	M7YXV0_TRIUA, SubName: Full=Uncharacterized protein {ECO:0000313|EMBL:EMS52472.1, ECO:0000313|EnsemblPlants:TRIUR3_17362-P1};
TRINITY_DN9971_c0_g1	19.3274	0	6.77	8.99e-05	0.00716	up	--	--	--	--	--	--
TRINITY_DN192585_c0_g1	72.5872	398.258	-2.46	9e-05	0.00716	down	GO:0016021,integral component of membrane; GO:0005886,plasma membrane; GO:0005385,zinc ion transmembrane transporter activity; GO:0071577,zinc ion transmembrane transport; GO:0006829,zinc ion transport	K14709: SLC39A1_2_3, ZIP1_2_3; solute carrier family 39 (zinc transporter), member 1/2/3	At3g12750	ref|XP_020181371.1|	ZIP8_ORYSJ, RecName: Full=Zinc transporter 8; AltName: Full=ZRT/IRT-like protein 8; Short=OsZIP8; Flags: Precursor;	A0A1D5TII4_WHEAT, SubName: Full=Uncharacterized protein {ECO:0000313|EnsemblPlants:TRIAE_CS42_2AS_TGACv1_112113_AA0330750.1};
TRINITY_DN176252_c2_g2	59.0017	11.8448	2.35	9.01e-05	0.00716	up	GO:0005840,ribosome; GO:0019843,rRNA binding; GO:0003735,structural constituent of ribosome; GO:0006412,translation	K02949: RP-S11e, RPS11; small subunit ribosomal protein S11e	SPAC31G5.03	gb|POF24710.1|	RS11_DUNTE, RecName: Full=40S ribosomal protein S11;	A9S6F7_PHYPA, SubName: Full=Predicted protein {ECO:0000313|EMBL:EDQ73311.1};
TRINITY_DN182481_c2_g1	84.9108	189.303	-1.16	9.2e-05	0.0073	down	--	--	--	--	--	--
TRINITY_DN186406_c1_g1	188.625	42.1434	2.15	9.24e-05	0.00732	up	--	--	--	--	--	--
TRINITY_DN169121_c0_g1	37.7576	7.04875	2.38	9.32e-05	0.00738	up	GO:0022627,cytosolic small ribosomal subunit; GO:0003723,RNA binding; GO:0019843,rRNA binding; GO:0003735,structural constituent of ribosome; GO:0006412,translation	K02987: RP-S4e, RPS4; small subunit ribosomal protein S4e	YJR145c	gb|ACG27081.1|	RS4_ORYSJ, RecName: Full=40S ribosomal protein S4; AltName: Full=SCAR protein SS620;	A0A1D1ZL98_9ARAE, SubName: Full=40S ribosomal protein S4 {ECO:0000313|EMBL:JAT67746.1}; Flags: Fragment;
TRINITY_DN201451_c0_g1	0	25.4732	-7.1	9.49e-05	0.0075	down	--	--	--	--	--	--
TRINITY_DN201075_c0_g2	951.818	5.36423	7.47	9.5e-05	0.0075	up	--	--	--	--	--	--
TRINITY_DN182684_c3_g2	38.5179	1.13699	5	9.51e-05	0.0075	up	--	--	--	--	--	--
TRINITY_DN126263_c0_g1	80.0638	22.8347	1.83	9.56e-05	0.00754	up	--	--	--	--	--	--
TRINITY_DN188532_c2_g1	35.7267	0	7.65	9.74e-05	0.00767	up	--	--	--	--	--	--
TRINITY_DN164834_c0_g2	0	21.2995	-6.84	9.78e-05	0.00769	down	--	--	--	ref|XP_020195042.1|	--	A0A287HRV0_HORVV, SubName: Full=Predicted protein {ECO:0000313|EnsemblPlants:HORVU2Hr1G038850.6};
TRINITY_DN191108_c0_g1	30.2945	5.57133	2.43	9.81e-05	0.00771	up	GO:0005737,cytoplasm; GO:0005634,nucleus; GO:0005886,plasma membrane; GO:0005524,ATP binding; GO:0009931,calcium-dependent protein serine/threonine kinase activity; GO:0005516,calmodulin binding; GO:0004683,calmodulin-dependent protein kinase activity; GO:0046872,metal ion binding; GO:0009738,abscisic acid-activated signaling pathway; GO:0010286,heat acclimation; GO:0035556,intracellular signal t…	K08794: CAMK1; calcium/calmodulin-dependent protein kinase I [EC:2.7.11.17]	YFR014c	gb|POE49467.1|	CAMK1_ARATH, RecName: Full=CDPK-related kinase 1; Short=AtCRK1; EC=2.7.11.1; AltName: Full=Calcium/calmodulin-dependent protein kinase 3; AltName: Full=Calmodulin-binding protein kinase 3; Short=AtCBK3; Short=CaM-binding protein kinase 3;	W2QGU1_PHYPN, SubName: Full=CAMK/CAMK1 protein kinase {ECO:0000313|EMBL:ETN12377.1};
TRINITY_DN176956_c1_g1	33.7656	3.77113	3.16	0.0001	0.00786	up	GO:0005737,cytoplasm; GO:0005730,nucleolus; GO:0005524,ATP binding; GO:0004004,ATP-dependent RNA helicase activity; GO:0003723,RNA binding; GO:0010501,RNA secondary structure unwinding	K11594: DDX3X, bel; ATP-dependent RNA helicase DDX3X [EC:3.6.4.13]	YPL119c	gb|POE63230.1|	RH37_ORYSJ, RecName: Full=DEAD-box ATP-dependent RNA helicase 37; EC=3.6.4.13; AltName: Full=OsPL10a;	R7Q7M9_CHOCR, SubName: Full=DEAD (Asp-Glu-Ala-Asp) box polypeptide 3, Putative {ECO:0000313|EMBL:CDF33843.1};
TRINITY_DN201317_c6_g5	23.0109	0.492474	5.27	0.0001	0.00786	up	--	--	--	gb|KQJ81492.1|	--	I1IVL0_BRADI, SubName: Full=Uncharacterized protein {ECO:0000313|EnsemblPlants:BRADI5G01080.1};
TRINITY_DN193276_c3_g8	30.2902	0	7.42	0.000102	0.00793	up	--	--	--	--	--	--
TRINITY_DN200798_c1_g6	416.601	0.492474	9.57	0.000102	0.00793	up	--	--	--	ref|XP_015689255.1|	--	A0A0D3FM82_9ORYZ, SubName: Full=Uncharacterized protein {ECO:0000313|EnsemblPlants:OBART03G28910.1};
TRINITY_DN63393_c0_g1	18.3622	0	6.7	0.000102	0.00793	up	--	--	--	--	--	--
TRINITY_DN182362_c2_g1	21.5425	0.492474	5.18	0.000102	0.00795	up	GO:0005737,cytoplasm; GO:0005856,cytoskeleton; GO:0005524,ATP binding	K10355: ACTF; actin, other eukaryote	SPBC32H8.12c	gb|ONM08622.1|	ACT1_ORYSJ, RecName: Full=Actin-1; AltName: Full=OsRAC1;	Q5G900_RHDSA, SubName: Full=Actin {ECO:0000313|EMBL:AAW56956.1}; Flags: Fragment;
TRINITY_DN171798_c0_g1	36.521	6.007	2.61	0.000102	0.00795	up	--	--	--	ref|XP_005647888.1|	--	I0YY75_COCSC, SubName: Full=Uncharacterized protein {ECO:0000313|EMBL:EIE23344.1};
TRINITY_DN198570_c0_g1	85.8695	227.51	-1.41	0.000102	0.00795	down	--	--	--	ref|XP_003564298.1|	--	A0A1D6D9H6_WHEAT, SubName: Full=Uncharacterized protein {ECO:0000313|EnsemblPlants:TRIAE_CS42_U_TGACv1_641108_AA2085350.1};
TRINITY_DN181828_c1_g1	1533.81	3439.21	-1.17	0.000103	0.00796	down	--	--	--	--	--	--
TRINITY_DN196018_c2_g2	46.1174	12.3181	1.92	0.000103	0.00796	up	--	--	--	--	--	--
TRINITY_DN38485_c0_g1	17.8971	0	6.66	0.000103	0.00798	up	--	--	--	--	--	--
TRINITY_DN175688_c4_g3	21.8366	0	6.94	0.000104	0.00804	up	GO:0005739,mitochondrion; GO:0008863,formate dehydrogenase (NAD+) activity; GO:0051287,NAD binding; GO:0016616,oxidoreductase activity, acting on the CH-OH group of donors, NAD or NADP as acceptor	K00122: FDH; formate dehydrogenase [EC:1.17.1.9]	YPL276w	gb|POE53373.1|	FDH2_ORYSJ, RecName: Full=Formate dehydrogenase 2, mitochondrial {ECO:0000255|HAMAP-Rule:MF_03210}; Short=FDH 2 {ECO:0000255|HAMAP-Rule:MF_03210}; EC=1.17.1.9 {ECO:0000255|HAMAP-Rule:MF_03210}; AltName: Full=NAD-dependent formate dehydrogenase 2 {ECO:0000255|HAMAP-Rule:MF_03210}; Flags: Precursor;	A0A0D6QU96_ARACU, RecName: Full=Formate dehydrogenase, mitochondrial {ECO:0000256|HAMAP-Rule:MF_03210}; Short=FDH {ECO:0000256|HAMAP-Rule:MF_03210}; EC=1.17.1.9 {ECO:0000256|HAMAP-Rule:MF_03210}; AltName: Full=NAD-dependent formate dehydrogenase {ECO:0000256|HAMAP-Rule:MF_03210};
TRINITY_DN171634_c0_g4	71.0319	10.6123	2.73	0.000107	0.00828	up	--	--	--	--	--	--
TRINITY_DN185841_c0_g1	25.3885	4.18811	2.62	0.000107	0.00828	up	--	--	--	--	--	--
TRINITY_DN177448_c0_g2	9.74813	63.3	-2.69	0.000108	0.00829	down	--	--	--	--	--	--
TRINITY_DN164316_c0_g1	0	23.7489	-7	0.000109	0.00835	down	--	--	--	--	--	--
TRINITY_DN200133_c1_g2	23.9429	3.27814	2.83	0.00011	0.00842	up	--	K03235: EF3, TEF3; elongation factor 3	SPCC417.08_1	dbj|BAK06597.1|	--	F2EGX5_HORVV, SubName: Full=Predicted protein {ECO:0000313|EMBL:BAK06597.1}; Flags: Fragment;
TRINITY_DN110125_c0_g1	17.4932	0	6.63	0.000112	0.00859	up	--	--	--	--	--	--
TRINITY_DN167240_c0_g1	28.4863	3.75191	2.86	0.000113	0.00861	up	--	--	SPAC1782.07	gb|POE47841.1|	--	--
TRINITY_DN182238_c1_g1	253.639	116.946	1.12	0.000114	0.00875	up	--	--	--	--	--	--
TRINITY_DN168464_c0_g1	39.6082	8.05344	2.3	0.000115	0.00877	up	GO:0005618,cell wall; GO:0005829,cytosol; GO:0022626,cytosolic ribosome; GO:0022627,cytosolic small ribosomal subunit; GO:0009506,plasmodesma; GO:0042788,polysomal ribosome; GO:0003735,structural constituent of ribosome; GO:0000028,ribosomal small subunit assembly; GO:0006412,translation	K02966: RP-S19e, RPS19; small subunit ribosomal protein S19e	SPBC21C3.13	gb|ABK21280.1|	RS191_ARATH, RecName: Full=40S ribosomal protein S19-1;	A0A1D1XG98_9ARAE, SubName: Full=40S ribosomal protein S19-1 {ECO:0000313|EMBL:JAT41396.1};
TRINITY_DN192338_c2_g2	8.37438	94.7092	-3.51	0.000116	0.00883	down	--	--	--	dbj|BAJ92626.1|	--	A0A287FN59_HORVV, SubName: Full=Uncharacterized protein {ECO:0000313|EnsemblPlants:HORVU1Hr1G054260.8};
TRINITY_DN183213_c3_g1	18.1447	0.416974	5.72	0.000116	0.00887	up	--	--	--	gb|POE88049.1|	--	--
TRINITY_DN176894_c1_g2	35.5116	0	7.65	0.000117	0.00893	up	GO:0016021,integral component of membrane; GO:0005886,plasma membrane; GO:0005524,ATP binding; GO:0004674,protein serine/threonine kinase activity; GO:0042742,defense response to bacterium; GO:0006468,protein phosphorylation	K17302: COPB2, SEC27; coatomer subunit beta'	At4g23180	ref|XP_020181927.1|	CRK10_ARATH, RecName: Full=Cysteine-rich receptor-like protein kinase 10; Short=Cysteine-rich RLK10; EC=2.7.11.-; AltName: Full=Receptor-like protein kinase 4; Flags: Precursor;	A0A1D5TSB1_WHEAT, SubName: Full=Uncharacterized protein {ECO:0000313|EnsemblPlants:TRIAE_CS42_2AS_TGACv1_727054_AA2170770.1};
TRINITY_DN199971_c1_g3	5.03436	27.4596	-2.46	0.000118	0.00899	down	--	K15078: SLX1; structure-specific endonuclease subunit SLX1 [EC:3.6.1.-]	At5g43210	ref|XP_020160715.1|	--	W5DUS1_WHEAT, SubName: Full=Uncharacterized protein {ECO:0000313|EnsemblPlants:TRIAE_CS42_4AL_TGACv1_291484_AA0994840.1};
TRINITY_DN198560_c6_g3	12.7352	226.033	-4.14	0.000119	0.00901	down	--	--	--	--	--	--
TRINITY_DN201673_c2_g1	46.3765	15.0464	1.64	0.000119	0.00902	up	GO:0012505,endomembrane system; GO:0019897,extrinsic component of plasma membrane; GO:0005886,plasma membrane; GO:0043531,ADP binding; GO:0005524,ATP binding; GO:0000166,nucleotide binding; GO:0009626,plant-type hypersensitive response; GO:0007165,signal transduction	K13457: RPM1, RPS3; disease resistance protein RPM1	At3g07040	gb|ABC94598.1|	RPM1_ARATH, RecName: Full=Disease resistance protein RPM1; AltName: Full=Resistance to Pseudomonas syringae protein 3;	A1XFD5_ORYSI, SubName: Full=NBS-LRR type R protein, Nbs2-Pi2 {ECO:0000313|EMBL:ABC94598.1};
TRINITY_DN199865_c1_g2	263.528	75.2703	1.81	0.000119	0.00905	up	GO:0016020,membrane; GO:0003885,D-arabinono-1,4-lactone oxidase activity; GO:0050660,flavin adenine dinucleotide binding; GO:0050105,L-gulonolactone oxidase activity; GO:0019853,L-ascorbic acid biosynthetic process	K00225: GLDH; L-galactono-1,4-lactone dehydrogenase [EC:1.3.2.3]	At2g46760	ref|XP_003573784.1|	GGLO6_ARATH, RecName: Full=Probable L-gulonolactone oxidase 6 {ECO:0000303|PubMed:20622436}; Short=AtGulLO6 {ECO:0000303|PubMed:20622436}; EC=1.1.3.8 {ECO:0000305}; Flags: Precursor;	I1I390_BRADI, SubName: Full=Uncharacterized protein {ECO:0000313|EMBL:KQJ96275.1, ECO:0000313|EnsemblPlants:BRADI3G22060.1};
TRINITY_DN168356_c0_g2	42.526	10.3655	2	0.000119	0.00905	up	--	--	--	gb|KDD73519.1|	--	A0A059LHL9_9CHLO, SubName: Full=Uncharacterized protein {ECO:0000313|EMBL:KDD73519.1};
TRINITY_DN185950_c1_g1	58.5618	23.2327	1.33	0.00012	0.00907	up	--	--	--	ref|XP_014758278.1|	--	A0A287MWK7_HORVV, SubName: Full=Uncharacterized protein {ECO:0000313|EnsemblPlants:HORVU4Hr1G001130.2};
TRINITY_DN159747_c0_g1	0	29.0738	-7.29	0.000121	0.00911	down	--	--	--	--	--	--
TRINITY_DN183896_c0_g5	2.05195	23.2921	-3.52	0.000122	0.00922	down	GO:0005634,nucleus; GO:0006355,regulation of transcription, DNA-templated; GO:0006351,transcription, DNA-templated	K13484: TTHL; 5-hydroxyisourate hydrolase / 2-oxo-4-hydroxy-4-carboxy-5-ureidoimidazoline decarboxylase [EC:3.5.2.17 4.1.1.97]	At5g05800	ref|XP_020178927.1|	LIMYB_ARATH, RecName: Full=L10-interacting MYB domain-containing protein {ECO:0000303|PubMed:25707794};	W4ZRS8_WHEAT, SubName: Full=Uncharacterized protein {ECO:0000313|EnsemblPlants:TRIAE_CS42_1AL_TGACv1_001218_AA0027140.1};
TRINITY_DN193454_c0_g1	43.0262	9.20912	2.22	0.000125	0.0094	up	--	--	--	--	--	--
TRINITY_DN185964_c0_g1	0	39.5015	-7.74	0.000125	0.00941	down	--	K11159: K11159; carotenoid cleavage dioxygenase	--	ref|XP_003576413.2|	--	A0A0Q3ER05_BRADI, SubName: Full=Uncharacterized protein {ECO:0000313|EMBL:KQJ89831.1};
TRINITY_DN188254_c0_g2	68.1755	14.3843	2.27	0.000126	0.00945	up	--	--	--	--	--	--
TRINITY_DN201006_c0_g1	28.4404	0.833949	5.36	0.000126	0.00945	up	--	--	--	--	--	--
TRINITY_DN192332_c1_g2	133.411	41.2709	1.68	0.000128	0.00958	up	--	--	--	--	--	--
TRINITY_DN196983_c2_g1	31.0029	3.29736	3.27	0.000128	0.00959	up	--	K01624: FBA, fbaA; fructose-bisphosphate aldolase, class II [EC:4.1.2.13]	SPBC19C2.07	gb|POE74315.1|	--	K3WU81_PYTUL, SubName: Full=Uncharacterized protein {ECO:0000313|EnsemblProtists:PYU1_T008528};
TRINITY_DN194710_c1_g1	89.2878	239.036	-1.42	0.000129	0.00967	down	GO:0005794,Golgi apparatus; GO:0016021,integral component of membrane; GO:0005886,plasma membrane; GO:0016760,cellulose synthase (UDP-forming) activity; GO:0016759,cellulose synthase activity; GO:0046872,metal ion binding; GO:0071555,cell wall organization; GO:0030244,cellulose biosynthetic process; GO:0009833,plant-type primary cell wall biogenesis; GO:0009834,plant-type secondary cell wall biog…	K10999: CESA; cellulose synthase A [EC:2.4.1.12]	At5g44030	ref|XP_003574029.1|	CESA7_ORYSJ, RecName: Full=Cellulose synthase A catalytic subunit 7 [UDP-forming]; EC=2.4.1.12; AltName: Full=OsCesA7;	A0A1D5S6A0_WHEAT, SubName: Full=Uncharacterized protein {ECO:0000313|EnsemblPlants:TRIAE_CS42_1BL_TGACv1_030372_AA0088320.1};
TRINITY_DN179098_c2_g3	16.5314	0	6.54	0.00013	0.0097	up	GO:0004013,adenosylhomocysteinase activity; GO:0051287,NAD binding; GO:0006730,one-carbon metabolic process; GO:0019510,S-adenosylhomocysteine catabolic process	K01251: E3.3.1.1, ahcY; adenosylhomocysteinase [EC:3.3.1.1]	At3g23810	dbj|GAX74537.1|	SAHH_PETCR, RecName: Full=Adenosylhomocysteinase; Short=AdoHcyase; EC=3.3.1.1; AltName: Full=S-adenosyl-L-homocysteine hydrolase;	A0A1J3JSY3_NOCCA, SubName: Full=Adenosylhomocysteinase {ECO:0000313|EMBL:JAU95481.1}; Flags: Fragment;
TRINITY_DN195042_c0_g1	33.5343	0	7.56	0.00013	0.0097	up	GO:0005737,cytoplasm; GO:0005525,GTP binding; GO:0003924,GTPase activity; GO:0003746,translation elongation factor activity	K03231: EEF1A; elongation factor 1-alpha	7303554	ref|XP_013901762.1|	EF1A_EUGGR, RecName: Full=Elongation factor 1-alpha; Short=EF-1-alpha;	R7Q1G0_CHOCR, SubName: Full=Translation elongation factor eEF1, subunit alpha {ECO:0000313|EMBL:CDF32437.1};
TRINITY_DN182660_c1_g2	16.2258	51.3946	-1.66	0.000132	0.00982	down	GO:0005783,endoplasmic reticulum; GO:0005789,endoplasmic reticulum membrane; GO:0016021,integral component of membrane; GO:0005506,iron ion binding; GO:0016491,oxidoreductase activity; GO:0006633,fatty acid biosynthetic process; GO:0000038,very long-chain fatty acid metabolic process	K19706: FAH; dihydroceramide fatty acyl 2-hydroxylase [EC:1.14.18.7]	At2g34770	ref|XP_003576810.1|	FAH1_ARATH, RecName: Full=Dihydroceramide fatty acyl 2-hydroxylase FAH1 {ECO:0000305}; EC=1.14.18.7 {ECO:0000269|PubMed:22635113}; AltName: Full=Fatty acid 2-hydroxylase 1 {ECO:0000303|PubMed:19054355}; Short=AtFAH1 {ECO:0000303|PubMed:19054355};	I1IG80_BRADI, SubName: Full=Uncharacterized protein {ECO:0000313|EMBL:KQJ85692.1, ECO:0000313|EnsemblPlants:BRADI4G01070.3};
TRINITY_DN180069_c1_g1	54.1407	144.09	-1.42	0.000133	0.00991	down	GO:0010330,cellulose synthase complex; GO:0009507,chloroplast; GO:0005794,Golgi apparatus; GO:0016021,integral component of membrane; GO:0005886,plasma membrane; GO:0016760,cellulose synthase (UDP-forming) activity; GO:0016759,cellulose synthase activity; GO:0046872,metal ion binding; GO:0030244,cellulose biosynthetic process; GO:0009833,plant-type primary cell wall biogenesis; GO:0009834,plant-t…	K10999: CESA; cellulose synthase A [EC:2.4.1.12]	At5g17420	ref|XP_004956855.1|	CESA9_ORYSJ, RecName: Full=Cellulose synthase A catalytic subunit 9 [UDP-forming]; EC=2.4.1.12; AltName: Full=OsCesA9;	A0A0E0M1C9_ORYPU, RecName: Full=Cellulose synthase {ECO:0000256|RuleBase:RU361116}; EC=2.4.1.12 {ECO:0000256|RuleBase:RU361116};
TRINITY_DN198543_c1_g2	57.2267	1.89543	5.01	0.000134	0.00994	up	--	--	--	--	--	--
TRINITY_DN197040_c0_g1	1222.92	520.171	1.23	0.000136	0.0101	up	GO:0016021,integral component of membrane; GO:0005774,vacuolar membrane; GO:0020037,heme binding; GO:0005506,iron ion binding; GO:0004497,monooxygenase activity; GO:0016705,oxidoreductase activity, acting on paired donors, with incorporation or reduction of molecular oxygen; GO:0050616,secologanin synthase activity; GO:0009820,alkaloid metabolic process	--	At3g14690	ref|XP_003569397.1|	C72A1_CATRO, RecName: Full=Secologanin synthase; Short=SLS; EC=1.3.3.9; AltName: Full=CYPLXXII; AltName: Full=Cytochrome P450 72A1;	I1HPL7_BRADI, SubName: Full=Uncharacterized protein {ECO:0000313|EnsemblPlants:BRADI2G44140.2};
TRINITY_DN173368_c2_g2	52.261	4.07365	3.61	0.000137	0.0101	up	--	--	--	--	--	--
TRINITY_DN196201_c0_g2	0	60.733	-8.36	0.000137	0.0101	down	--	--	--	--	--	--
TRINITY_DN187273_c0_g2	142.106	10.0831	3.85	0.000138	0.0102	up	--	--	--	--	--	--
TRINITY_DN192221_c1_g7	0	20.73	-6.81	0.000138	0.0102	down	--	--	--	--	--	--
TRINITY_DN161432_c1_g3	16.2108	0	6.52	0.000139	0.0102	up	--	--	--	--	--	--
TRINITY_DN167755_c0_g1	46.4723	0	8.03	0.00014	0.0103	up	GO:0015030,Cajal body; GO:0071013,catalytic step 2 spliceosome; GO:0005634,nucleus; GO:0005681,spliceosomal complex; GO:0046540,U4/U6 x U5 tri-snRNP complex; GO:0000398,mRNA splicing, via spliceosome; GO:2000630,positive regulation of miRNA metabolic process; GO:2000636,positive regulation of primary miRNA processing; GO:0009409,response to cold; GO:0080188,RNA-directed DNA methylation; GO:000984…	K12855: PRPF6, PRP6; pre-mRNA-processing factor 6	SPBC6B1.07	dbj|BAK00717.1|	STA1_ARATH, RecName: Full=Protein STABILIZED1; AltName: Full=Pre-mRNA processing factor 6-like protein; AltName: Full=Protein EMBRYO DEFECTIVE 2770;	M8B7H4_AEGTA, SubName: Full=Pre-mRNA-processing factor 6 {ECO:0000313|EMBL:EMT09961.1, ECO:0000313|EnsemblPlants:EMT09961};
TRINITY_DN200678_c1_g9	23.2808	4.51036	2.39	0.000143	0.0105	up	--	--	--	--	--	--
TRINITY_DN194279_c0_g1	30.2494	3.86533	2.94	0.000144	0.0106	up	--	--	SPAC32A11.02c	gb|POE62385.1|	--	F2E0R1_HORVV, SubName: Full=Predicted protein {ECO:0000313|EMBL:BAK00933.1};
TRINITY_DN177700_c0_g2	40.9544	5.47713	2.92	0.000145	0.0107	up	--	--	--	--	--	--
TRINITY_DN4663_c0_g1	0	23.2328	-6.97	0.000147	0.0107	down	--	--	--	--	--	--
TRINITY_DN179367_c0_g4	49.9018	3.14532	4	0.000148	0.0108	up	--	--	--	--	--	--
TRINITY_DN167579_c0_g1	0	48.1742	-8.02	0.000149	0.0109	down	--	--	--	--	--	--
TRINITY_DN155873_c0_g1	22.4071	0	6.98	0.000149	0.0109	up	--	--	--	--	--	--
TRINITY_DN200901_c2_g4	0	99.1871	-9.07	0.000149	0.0109	down	--	--	--	gb|ACN34364.1|	--	C0PGP8_MAIZE, SubName: Full=Uncharacterized protein {ECO:0000313|EMBL:ACN34364.1};
TRINITY_DN199453_c2_g2	35.4665	128.204	-1.85	0.000149	0.0109	down	GO:0005737,cytoplasm; GO:0004365,glyceraldehyde-3-phosphate dehydrogenase (NAD+) (phosphorylating) activity; GO:0051287,NAD binding; GO:0050661,NADP binding; GO:0006006,glucose metabolic process; GO:0006096,glycolytic process	K00134: GAPDH, gapA; glyceraldehyde 3-phosphate dehydrogenase [EC:1.2.1.12]	At3g04120	gb|AEZ00738.1|	G3PC3_ORYSJ, RecName: Full=Glyceraldehyde-3-phosphate dehydrogenase 3, cytosolic; EC=1.2.1.12;	H6VXA1_9POAL, SubName: Full=Glyceraldehyde-3-phosphate dehydrogenase subunit 1 {ECO:0000313|EMBL:AEZ00738.1}; Flags: Fragment;
TRINITY_DN201133_c3_g1	45.3292	12.0708	1.91	0.00015	0.0109	up	GO:0009570,chloroplast stroma; GO:0004072,aspartate kinase activity; GO:0005524,ATP binding; GO:0008652,cellular amino acid biosynthetic process; GO:0009089,lysine biosynthetic process via diaminopimelate; GO:0009088,threonine biosynthetic process	K00928: lysC; aspartate kinase [EC:2.7.2.4]	At5g13280	gb|EEC76545.1|	AK1_ARATH, RecName: Full=Aspartokinase 1, chloroplastic; EC=2.7.2.4; AltName: Full=Aspartate kinase 1; Flags: Precursor;	A0A0E0KLK6_ORYPU, RecName: Full=Aspartokinase {ECO:0000256|RuleBase:RU003448}; EC=2.7.2.4 {ECO:0000256|RuleBase:RU003448};
TRINITY_DN158407_c0_g1	0.324036	19.1959	-5.73	0.000152	0.011	down	GO:0042995,cell projection; GO:0005737,cytoplasm; GO:0005856,cytoskeleton; GO:0005509,calcium ion binding	K02183: CALM; calmodulin	Hs17475023	ref|XP_001703420.1|	CALM_CHLRE, RecName: Full=Calmodulin; Short=CaM;	A0A1D1XDU5_9ARAE, SubName: Full=Myosin regulatory light chain 2 {ECO:0000313|EMBL:JAT40580.1};
TRINITY_DN199024_c0_g1	76.7245	21.3944	1.85	0.000155	0.0112	up	GO:0016021,integral component of membrane; GO:0016020,membrane; GO:0005886,plasma membrane; GO:0005524,ATP binding; GO:0008553,proton-exporting ATPase activity, phosphorylative mechanism; GO:0046872,metal ion binding; GO:0006754,ATP biosynthetic process	K01535: PMA1, PMA2; H+-transporting ATPase [EC:3.6.3.6]	At3g42640	ref|XP_006845683.1|	PMA8_ARATH, RecName: Full=ATPase 8, plasma membrane-type; EC=3.6.3.6; AltName: Full=Proton pump 8;	W1PHB1_AMBTC, RecName: Full=Plasma membrane ATPase {ECO:0000256|RuleBase:RU362083}; EC=3.6.3.6 {ECO:0000256|RuleBase:RU362083};
TRINITY_DN179538_c4_g1	3453.32	1676.53	1.04	0.000155	0.0112	up	GO:0009507,chloroplast; GO:0005737,cytoplasm; GO:0005829,cytosol; GO:0004364,glutathione transferase activity; GO:0009704,de-etiolation; GO:0006749,glutathione metabolic process; GO:0048527,lateral root development; GO:0080148,negative regulation of response to water deprivation; GO:0040008,regulation of growth; GO:0060416,response to growth hormone; GO:0080167,response to karrikin; GO:0009651,re…	K00799: GST, gst; glutathione S-transferase [EC:2.5.1.18]	At1g10370	emb|CDJ26554.1|	GSTUH_ARATH, RecName: Full=Glutathione S-transferase U17; Short=AtGSTU17; EC=2.5.1.18; AltName: Full=GST class-tau member 17; AltName: Full=Glutathione S-transferase 30; AltName: Full=Protein EARLY RESPONSIVE TO DEHYDRATION 9;	A0A077RFD0_WHEAT, SubName: Full=Uncharacterized protein {ECO:0000313|EMBL:CDJ26554.1};
TRINITY_DN186736_c0_g5	40.7789	6.86035	2.57	0.000156	0.0113	up	--	--	--	--	--	--
TRINITY_DN188900_c7_g1	28.923	0.644512	5.5	0.000158	0.0114	up	--	--	--	--	--	--
TRINITY_DN165300_c0_g2	18.1309	0	6.68	0.000159	0.0115	up	--	--	--	--	--	--
TRINITY_DN221007_c0_g1	0	19.825	-6.74	0.00016	0.0115	down	--	--	--	--	--	--
TRINITY_DN174462_c0_g3	123.398	36.1414	1.78	0.000162	0.0117	up	--	--	Hs18556423	gb|POE71338.1|	--	H3G579_PHYRM, SubName: Full=Uncharacterized protein {ECO:0000313|EnsemblProtists:Phyra40276};
TRINITY_DN198515_c0_g1	61.636	12.9605	2.23	0.000163	0.0117	up	GO:0015935,small ribosomal subunit; GO:0003735,structural constituent of ribosome; GO:0006412,translation	K02998: RP-SAe, RPSA; small subunit ribosomal protein SAe	SPAPJ698.02c	dbj|BAJ88251.1|	RSSA_CICAR, RecName: Full=40S ribosomal protein SA {ECO:0000255|HAMAP-Rule:MF_03015}; AltName: Full=p40;	F2CZI0_HORVV, RecName: Full=40S ribosomal protein SA {ECO:0000256|HAMAP-Rule:MF_03015};
TRINITY_DN158809_c0_g1	19.1469	0	6.75	0.000164	0.0118	up	--	--	--	--	--	--
TRINITY_DN199202_c1_g3	900.401	2054.94	-1.19	0.000164	0.0118	down	--	--	--	ref|XP_003580392.1|	--	A0A0Q3IDM3_BRADI, SubName: Full=Uncharacterized protein {ECO:0000313|EMBL:KQJ84208.1};
TRINITY_DN177492_c2_g1	31.8152	0.833949	5.5	0.000165	0.0119	up	--	--	--	gb|POE72129.1|	--	A0A1D1Y0L1_9ARAE, SubName: Full=Uncharacterized protein {ECO:0000313|EMBL:JAT48180.1};
TRINITY_DN176975_c0_g4	0.724482	22.002	-5.01	0.000165	0.0119	down	--	K07466: RFA1, RPA1, rpa; replication factor A1	--	ref|XP_014756581.1|	--	I1I3Y2_BRADI, SubName: Full=Uncharacterized protein {ECO:0000313|EnsemblPlants:BRADI3G26420.2};
TRINITY_DN168270_c0_g3	318.34	0	10.81	0.000169	0.0121	up	--	--	--	--	--	--
TRINITY_DN180213_c0_g1	30.0327	5.76025	2.36	0.000171	0.0122	up	--	--	SPBC1271.12	gb|POF03929.1|	--	L1J9B9_GUITH, SubName: Full=Uncharacterized protein {ECO:0000313|EMBL:EKX44699.1, ECO:0000313|EnsemblProtists:EKX44699};
TRINITY_DN186736_c0_g2	28.283	3.77061	2.85	0.000176	0.0126	up	--	--	--	--	--	--
TRINITY_DN198800_c1_g1	998.302	298.989	1.74	0.000177	0.0126	up	GO:0042973,glucan endo-1,3-beta-D-glucosidase activity; GO:0006076,(1->3)-beta-D-glucan catabolic process; GO:0050832,defense response to fungus	K19891: GN1_2_3; glucan endo-1,3-beta-glucosidase 1/2/3 [EC:3.2.1.39]	At3g57260	gb|AAY96422.1|	E13B_HORVU, RecName: Full=Glucan endo-1,3-beta-glucosidase GII; EC=3.2.1.39 {ECO:0000269|PubMed:8514770}; AltName: Full=(1->3)-beta-glucan endohydrolase GII; AltName: Full=(1->3)-beta-glucanase isoenzyme GII; AltName: Full=Beta-1,3-endoglucanase GII; Flags: Precursor;	Q4JH28_WHEAT, SubName: Full=Beta-1,3-glucanase {ECO:0000313|EMBL:AAY96422.1, ECO:0000313|EnsemblPlants:TRIAE_CS42_3AL_TGACv1_193635_AA0615870.1};
TRINITY_DN196673_c0_g1	94.1375	17.9999	2.36	0.000177	0.0127	up	--	--	SPAC15E1.02c	gb|POE94361.1|	--	A0A0D6QSF5_ARACU, SubName: Full=Uncharacterized protein {ECO:0000313|EMBL:JAG93399.1};
TRINITY_DN178250_c5_g6	156.561	56.8913	1.46	0.000178	0.0127	up	--	--	YPR149w	gb|POF01334.1|	--	--
TRINITY_DN193366_c1_g1	27.3304	3.54359	2.97	0.000178	0.0127	up	--	--	--	--	--	--
TRINITY_DN179388_c0_g1	231.403	0.416974	9.39	0.000178	0.0127	up	--	--	--	--	--	--
TRINITY_DN188642_c0_g2	14.9365	113.732	-2.92	0.00018	0.0128	down	GO:0005737,cytoplasm; GO:0031965,nuclear membrane; GO:0005886,plasma membrane; GO:0009506,plasmodesma; GO:0046870,cadmium ion binding; GO:0005507,copper ion binding; GO:0032791,lead ion binding; GO:0046916,cellular transition metal ion homeostasis; GO:0010286,heat acclimation; GO:0030001,metal ion transport	K10752: RBBP4, HAT2, CAF1, MIS16; histone-binding protein RBBP4	At4g38580	ref|XP_020151246.1|	HIP26_ARATH, RecName: Full=Heavy metal-associated isoprenylated plant protein 26 {ECO:0000303|PubMed:21072340, ECO:0000303|PubMed:23368984}; Short=AtHIP26 {ECO:0000303|PubMed:23368984}; Short=AtHIPP26 {ECO:0000303|PubMed:21072340, ECO:0000303|PubMed:23368984}; AltName: Full=Farnesylated protein 6 {ECO:0000303|PubMed:8837031}; Short=AtFP6 {ECO:0000303|PubMed:8837031}; Flags: Precursor;	A0A1D6BMT3_WHEAT, SubName: Full=Uncharacterized protein {ECO:0000313|EnsemblPlants:TRIAE_CS42_7AL_TGACv1_557370_AA1780480.1};
TRINITY_DN169356_c0_g2	36.1688	10.3466	1.81	0.00018	0.0128	up	GO:0009507,chloroplast; GO:0022625,cytosolic large ribosomal subunit; GO:0015934,large ribosomal subunit; GO:0005886,plasma membrane; GO:0005774,vacuolar membrane; GO:0005773,vacuole; GO:0003723,RNA binding; GO:0003735,structural constituent of ribosome; GO:0006412,translation	K02883: RP-L18e, RPL18; large subunit ribosomal protein L18e	SPBC11C11.07	dbj|BAJ97000.1|	RL182_ARATH, RecName: Full=60S ribosomal protein L18-2;	F2DPH9_HORVV, SubName: Full=Predicted protein {ECO:0000313|EMBL:BAJ97000.1};
TRINITY_DN187397_c3_g3	20.4675	0	6.85	0.00018	0.0128	up	--	--	--	gb|POE72093.1|	--	--
TRINITY_DN151630_c0_g1	98.4616	32.6713	1.59	0.000181	0.0128	up	--	--	--	--	--	--
TRINITY_DN260573_c0_g1	17.3657	0	6.62	0.000181	0.0128	up	--	--	--	--	--	--
TRINITY_DN194372_c1_g2	0	21.2848	-6.84	0.000187	0.0133	down	--	--	--	--	--	--
TRINITY_DN173291_c4_g2	21.6375	0	6.93	0.00019	0.0134	up	--	--	--	--	--	--
TRINITY_DN188791_c0_g2	104.559	25.2435	2.05	0.00019	0.0134	up	--	--	--	gb|POE46978.1|	--	F2DLM0_HORVV, SubName: Full=Predicted protein {ECO:0000313|EMBL:BAJ95991.1};
TRINITY_DN186160_c0_g5	184.241	86.2976	1.09	0.000193	0.0136	up	--	--	--	--	--	--
TRINITY_DN199530_c1_g3	71.6939	33.5033	1.1	0.000196	0.0138	up	--	--	--	gb|EMS66107.1|	--	A0A0E0LLK0_ORYPU, SubName: Full=Uncharacterized protein {ECO:0000313|EnsemblPlants:OPUNC07G15730.1};
TRINITY_DN176610_c4_g2	40.5043	7.76928	2.36	0.000198	0.0139	up	GO:0005618,cell wall; GO:0009507,chloroplast; GO:0005829,cytosol; GO:0022625,cytosolic large ribosomal subunit; GO:0022626,cytosolic ribosome; GO:0016020,membrane; GO:0005730,nucleolus; GO:0005886,plasma membrane; GO:0009506,plasmodesma; GO:0042788,polysomal ribosome; GO:0005773,vacuole; GO:0003729,mRNA binding; GO:0003735,structural constituent of ribosome; GO:0002181,cytoplasmic translation	K02930: RP-L4e, RPL4; large subunit ribosomal protein L4e	SPBC1711.06	dbj|BAK06662.1|	RL4A_ARATH, RecName: Full=60S ribosomal protein L4-1; Short=L1;	F2EH40_HORVV, SubName: Full=Predicted protein {ECO:0000313|EMBL:BAK06662.1};
TRINITY_DN167965_c0_g1	30.0721	5.06016	2.57	0.000201	0.0141	up	GO:0005618,cell wall; GO:0005829,cytosol; GO:0022626,cytosolic ribosome; GO:0022627,cytosolic small ribosomal subunit; GO:0009506,plasmodesma; GO:0042788,polysomal ribosome; GO:0003735,structural constituent of ribosome; GO:0000028,ribosomal small subunit assembly; GO:0006412,translation	K02966: RP-S19e, RPS19; small subunit ribosomal protein S19e	SPBC21C3.13	gb|ABK21280.1|	RS191_ARATH, RecName: Full=40S ribosomal protein S19-1;	A0A1D1XG98_9ARAE, SubName: Full=40S ribosomal protein S19-1 {ECO:0000313|EMBL:JAT41396.1};
TRINITY_DN191257_c0_g1	38.066	5.19227	2.9	0.000204	0.0143	up	--	--	--	--	--	--
TRINITY_DN185125_c1_g1	249.45	3.44732	6.13	0.000207	0.0145	up	--	--	--	--	--	--
TRINITY_DN157604_c0_g2	0.320595	35.6418	-6.63	0.000207	0.0145	down	--	--	--	--	--	--
TRINITY_DN182774_c0_g2	769.682	209.684	1.87	0.000207	0.0145	up	GO:0005615,extracellular space; GO:0004568,chitinase activity; GO:0006032,chitin catabolic process; GO:0000272,polysaccharide catabolic process	K01183: E3.2.1.14; chitinase [EC:3.2.1.14]	At5g24090	emb|CDM82745.1|	CHIA_PHAAN, RecName: Full=Acidic endochitinase; EC=3.2.1.14; Flags: Precursor;	A0A1D5V7B1_WHEAT, SubName: Full=Uncharacterized protein {ECO:0000313|EnsemblPlants:TRIAE_CS42_3AL_TGACv1_194246_AA0629570.1};
TRINITY_DN173755_c1_g8	23.5459	1.38374	4.16	0.000209	0.0146	up	--	--	YHR138c	gb|POE94556.1|	--	A0A1D1XTN7_9ARAE, SubName: Full=Uncharacterized protein C338.12 {ECO:0000313|EMBL:JAT45759.1}; Flags: Fragment;
TRINITY_DN201061_c1_g1	69.046	241.11	-1.8	0.000212	0.0148	down	--	--	--	--	--	--
TRINITY_DN163676_c1_g2	27.6414	0.966768	4.84	0.000213	0.0148	up	--	--	--	--	--	--
TRINITY_DN169340_c0_g1	23.0889	1.57266	3.89	0.000213	0.0148	up	GO:0005737,cytoplasm; GO:0005856,cytoskeleton; GO:0003779,actin binding	K05759: PFN; profilin	YOR122c	ref|XP_003058110.1|	PROF3_TOBAC, RecName: Full=Profilin-3;	A0A1D1XXW8_9ARAE, RecName: Full=Profilin {ECO:0000256|RuleBase:RU003909};
TRINITY_DN193448_c3_g5	103.621	19.4595	2.4	0.000213	0.0148	up	--	--	--	dbj|BAS85333.1|	--	A0A0P0W0A8_ORYSJ, SubName: Full=Os03g0624700 protein {ECO:0000313|EMBL:BAS85333.1}; Flags: Fragment;
TRINITY_DN162565_c0_g1	23.8294	0.644512	5.22	0.000215	0.0149	up	--	--	--	--	--	--
TRINITY_DN228087_c0_g1	15.8868	0	6.49	0.000215	0.015	up	--	--	--	--	--	--
TRINITY_DN198793_c0_g2	9.25751	36.556	-1.97	0.000216	0.015	down	--	--	--	--	--	--
TRINITY_DN185009_c1_g1	53.461	10.4403	2.34	0.000224	0.0155	up	--	K02429: fucP; MFS transporter, FHS family, L-fucose permease	--	gb|POE49114.1|	--	A9RB56_PHYPA, SubName: Full=Uncharacterized protein {ECO:0000313|EMBL:EDQ83581.1};
TRINITY_DN187790_c6_g3	70.6088	150.302	-1.08	0.000225	0.0156	down	GO:0005783,endoplasmic reticulum; GO:0005794,Golgi apparatus; GO:0016021,integral component of membrane; GO:0016020,membrane; GO:0009505,plant-type cell wall; GO:0005886,plasma membrane; GO:0009506,plasmodesma; GO:0005774,vacuolar membrane; GO:0020037,heme binding; GO:0042802,identical protein binding; GO:0005506,iron ion binding; GO:0016710,trans-cinnamate 4-monooxygenase activity; GO:0032502,de…	K00487: CYP73A; trans-cinnamate 4-monooxygenase [EC:1.14.13.11]	At2g30490	ref|XP_003568699.1|	TCMO_ARATH, RecName: Full=Trans-cinnamate 4-monooxygenase; EC=1.14.13.11; AltName: Full=Cinnamic acid 4-hydroxylase; Short=C4H; Short=CA4H; AltName: Full=Cytochrome P450 73; AltName: Full=Cytochrome P450C4H;	I1HKP5_BRADI, SubName: Full=Uncharacterized protein {ECO:0000313|EMBL:KQK06925.1, ECO:0000313|EnsemblPlants:BRADI2G31510.1};
TRINITY_DN188033_c3_g1	84.8063	189.28	-1.16	0.000226	0.0156	down	--	--	--	--	--	--
TRINITY_DN198780_c0_g1	24.797	4.43434	2.49	0.000226	0.0156	up	GO:0016021,integral component of membrane; GO:0016020,membrane; GO:0005886,plasma membrane; GO:0005524,ATP binding; GO:0008553,proton-exporting ATPase activity, phosphorylative mechanism; GO:0046872,metal ion binding; GO:0006754,ATP biosynthetic process	K01535: PMA1, PMA2; H+-transporting ATPase [EC:3.6.3.6]	At3g42640	ref|XP_006845683.1|	PMA8_ARATH, RecName: Full=ATPase 8, plasma membrane-type; EC=3.6.3.6; AltName: Full=Proton pump 8;	M1VKQ8_CYAM1, RecName: Full=Plasma membrane ATPase {ECO:0000256|RuleBase:RU362083}; EC=3.6.3.6 {ECO:0000256|RuleBase:RU362083};
TRINITY_DN198227_c0_g3	0	356.404	-10.91	0.000229	0.0158	down	--	--	--	--	--	--
TRINITY_DN169618_c1_g4	15.5245	0	6.45	0.000229	0.0158	up	--	--	--	--	--	--
TRINITY_DN39636_c0_g1	15.5245	0	6.45	0.000229	0.0158	up	--	--	--	--	--	--
TRINITY_DN198126_c0_g5	18.1691	0	6.68	0.000231	0.0159	up	--	--	--	--	--	--
TRINITY_DN173308_c0_g2	46.3175	9.5319	2.29	0.000233	0.016	up	GO:0005773,vacuole; GO:0004190,aspartic-type endopeptidase activity; GO:0006629,lipid metabolic process; GO:0030163,protein catabolic process; GO:0006508,proteolysis	K08245: E3.4.23.40; phytepsin [EC:3.4.23.40]	At1g11910	dbj|BAS73554.1|	ASPR1_ORYSJ, RecName: Full=Aspartic proteinase oryzasin-1; EC=3.4.23.-; Flags: Precursor;	A0A0P0V679_ORYSJ, SubName: Full=Os01g0663400 protein {ECO:0000313|EMBL:BAS73554.1}; Flags: Fragment;
TRINITY_DN187437_c1_g2	71.6481	166.464	-1.21	0.000234	0.016	down	GO:0031969,chloroplast membrane; GO:0009535,chloroplast thylakoid membrane; GO:0071949,FAD binding; GO:0009540,zeaxanthin epoxidase [overall] activity; GO:0009688,abscisic acid biosynthetic process	K09838: ZEP, ABA1; zeaxanthin epoxidase [EC:1.14.15.21]	At2g21530	dbj|BAJ92505.1|	ABA2_NICPL, RecName: Full=Zeaxanthin epoxidase, chloroplastic; EC=1.14.15.21; Flags: Precursor;	A0A287NJV0_HORVV, SubName: Full=Uncharacterized protein {ECO:0000313|EnsemblPlants:HORVU4Hr1G023580.1};
TRINITY_DN184574_c0_g2	34.7824	6.72649	2.33	0.000234	0.0161	up	GO:0005737,cytoplasm; GO:0005525,GTP binding; GO:0003924,GTPase activity; GO:0003746,translation elongation factor activity	K03234: EEF2; elongation factor 2	SPAC513.01c	dbj|BAJ87061.1|	EF2_BETVU, RecName: Full=Elongation factor 2; Short=EF-2;	F2CW40_HORVV, SubName: Full=Predicted protein {ECO:0000313|EMBL:BAJ87061.1};
TRINITY_DN175860_c2_g4	24.6709	1.55344	3.84	0.000236	0.0162	up	GO:0000786,nucleosome; GO:0005634,nucleus; GO:0003677,DNA binding; GO:0046982,protein heterodimerization activity	K11253: H3; histone H3	Hs4504279	gb|OTG18495.1|	H3_MARPO, RecName: Full=Histone H3;	A0A1D1XC67_9ARAE, RecName: Full=Histone H3 {ECO:0000256|RuleBase:RU004471};
TRINITY_DN180518_c0_g1	20.4825	2.70965	2.88	0.000237	0.0163	up	--	--	YBR298c	dbj|BAK04968.1|	--	F2EC96_HORVV, SubName: Full=Predicted protein {ECO:0000313|EMBL:BAK04968.1};
TRINITY_DN187081_c1_g1	906.856	75.633	3.59	0.000238	0.0163	up	GO:0005634,nucleus; GO:0003700,DNA binding transcription factor activity; GO:0008270,zinc ion binding; GO:0048571,long-day photoperiodism; GO:0048579,negative regulation of long-day photoperiodism, flowering; GO:0045892,negative regulation of transcription, DNA-templated; GO:0048576,positive regulation of short-day photoperiodism, flowering; GO:0009909,regulation of flower development; GO:0006355…	K12135: CO; zinc finger protein CONSTANS	At5g57660	gb|PAN23011.1|	COL5_ARATH, RecName: Full=Zinc finger protein CONSTANS-LIKE 5;	A0A0E0LE71_ORYPU, SubName: Full=Uncharacterized protein {ECO:0000313|EnsemblPlants:OPUNC06G21040.1};
TRINITY_DN174190_c1_g3	9.18798	130.583	-3.82	0.000239	0.0163	down	--	--	--	--	--	--
TRINITY_DN170022_c0_g2	51.1553	13.2848	1.96	0.00024	0.0164	up	GO:0005840,ribosome; GO:0003735,structural constituent of ribosome; GO:0006412,translation	K02934: RP-L6e, RPL6; large subunit ribosomal protein L6e	Hs16753227	ref|XP_019245444.1|	RL6_MESCR, RecName: Full=60S ribosomal protein L6; AltName: Full=YL16-like;	A0A1D1YC51_9ARAE, SubName: Full=60S ribosomal protein L6 {ECO:0000313|EMBL:JAT52194.1};
TRINITY_DN158618_c0_g1	35.7017	0.984948	5	0.000241	0.0165	up	--	--	--	--	--	--
TRINITY_DN191938_c0_g3	193.413	68.7379	1.5	0.000242	0.0165	up	--	--	--	--	--	--
TRINITY_DN183317_c0_g1	6.48333	29.9614	-2.22	0.000243	0.0166	down	GO:0005789,endoplasmic reticulum membrane; GO:0010008,endosome membrane; GO:0016021,integral component of membrane; GO:0005886,plasma membrane; GO:0008289,lipid binding; GO:0070273,phosphatidylinositol-4-phosphate binding; GO:0009873,ethylene-activated signaling pathway; GO:1900056,negative regulation of leaf senescence; GO:0009626,plant-type hypersensitive response; GO:1900150,regulation of defe…	--	At1g06050	gb|EMS48125.1|	EDR2_ARATH, RecName: Full=Protein ENHANCED DISEASE RESISTANCE 2;	N1QWC7_AEGTA, SubName: Full=Uncharacterized protein {ECO:0000313|EMBL:EMT13831.1, ECO:0000313|EnsemblPlants:EMT13831};
TRINITY_DN201696_c2_g4	614.82	250.473	1.29	0.000246	0.0167	up	GO:0016021,integral component of membrane; GO:0005886,plasma membrane; GO:0005524,ATP binding; GO:0005516,calmodulin binding; GO:0030246,carbohydrate binding; GO:0004674,protein serine/threonine kinase activity; GO:0006468,protein phosphorylation; GO:0048544,recognition of pollen	K04733: IRAK4; interleukin-1 receptor-associated kinase 4 [EC:2.7.11.1]	At1g11330	ref|XP_020198353.1|	Y1661_ARATH, RecName: Full=Putative G-type lectin S-receptor-like serine/threonine-protein kinase At1g61610; EC=2.7.11.1; Flags: Precursor;	T1LD28_TRIUA, SubName: Full=Serine/threonine-protein kinase {ECO:0000313|EnsemblPlants:TRIUR3_02462-P1};
TRINITY_DN189776_c1_g1	61.7388	23.6491	1.38	0.000247	0.0168	up	GO:0031969,chloroplast membrane; GO:0016021,integral component of membrane; GO:0015121,phosphoenolpyruvate:phosphate antiporter activity; GO:0071917,triose-phosphate transmembrane transporter activity; GO:0008643,carbohydrate transport; GO:0015714,phosphoenolpyruvate transport; GO:0035436,triose phosphate transmembrane transport	K15283: SLC35E1; solute carrier family 35, member E1	At5g33320	ref|XP_015692496.1|	PPT3_ORYSJ, RecName: Full=Phosphoenolpyruvate/phosphate translocator 3, chloroplastic; Short=OsPPT3; Flags: Precursor;	J3M4D8_ORYBR, SubName: Full=Uncharacterized protein {ECO:0000313|EnsemblPlants:OB05G14620.1};
TRINITY_DN181909_c1_g3	22.9731	0.644512	5.17	0.000248	0.0168	up	--	--	--	gb|POE72129.1|	--	A0A1D1Y0L1_9ARAE, SubName: Full=Uncharacterized protein {ECO:0000313|EMBL:JAT48180.1};
TRINITY_DN175893_c0_g2	34.7442	8.50903	2.03	0.000248	0.0168	up	--	--	--	dbj|GAQ81780.1|	--	A0A1Y1HT34_KLENI, SubName: Full=Uncharacterized protein {ECO:0000313|EMBL:GAQ81780.1};
TRINITY_DN196137_c1_g7	13.0117	52.7394	-2.03	0.000249	0.0169	down	--	--	--	dbj|BAT03886.1|	--	A0A0P0XC17_ORYSJ, SubName: Full=Os08g0155550 protein {ECO:0000313|EMBL:BAT03886.1}; Flags: Fragment;
TRINITY_DN181215_c2_g4	196.348	0.246237	9.15	0.000249	0.0169	up	GO:0016021,integral component of membrane	K13420: FLS2; LRR receptor-like serine/threonine-protein kinase FLS2 [EC:2.7.11.1]	At2g15080	dbj|BAJ95144.1|	RLP19_ARATH, RecName: Full=Receptor-like protein 19 {ECO:0000303|PubMed:18434605}; Short=AtRLP19 {ECO:0000303|PubMed:18434605}; Flags: Precursor;	A0A0D3F7M1_9ORYZ, SubName: Full=Uncharacterized protein {ECO:0000313|EnsemblPlants:OBART02G24100.1};
TRINITY_DN191744_c1_g3	0.972109	40.9492	-5.37	0.000251	0.017	down	--	--	--	--	--	--
TRINITY_DN184797_c6_g2	262.365	108.92	1.26	0.000252	0.017	up	--	--	--	--	--	--
TRINITY_DN179616_c0_g1	42.0957	8.09102	2.34	0.000252	0.017	up	GO:0005789,endoplasmic reticulum membrane; GO:0016021,integral component of membrane; GO:0016717,oxidoreductase activity, acting on paired donors, with oxidation of a pair of donors resulting in the reduction of molecular oxygen to two molecules of water; GO:0006636,unsaturated fatty acid biosynthetic process	K10256: FAD2; omega-6 fatty acid desaturase / acyl-lipid omega-6 desaturase (Delta-12 desaturase) [EC:1.14.19.6 1.14.19.22]	At3g12120	gb|POF11538.1|	FD6E2_SOYBN, RecName: Full=Omega-6 fatty acid desaturase, endoplasmic reticulum isozyme 2; EC=1.14.19.-;	A0A1X6PIG8_PORUM, SubName: Full=Uncharacterized protein {ECO:0000313|EMBL:OSX80488.1};
TRINITY_DN180950_c0_g1	37.1206	6.23402	2.55	0.000254	0.0171	up	--	--	--	--	--	--
TRINITY_DN182362_c3_g6	31.3483	73.6981	-1.24	0.000255	0.0171	down	GO:0005737,cytoplasm; GO:0005856,cytoskeleton; GO:0005524,ATP binding	K10355: ACTF; actin, other eukaryote	At5g09810	gb|KQK88397.1|	ACT2_ORYSJ, RecName: Full=Actin-2;	A0A0Q3N0T5_SETIT, SubName: Full=Uncharacterized protein {ECO:0000313|EMBL:KQK88397.1}; Flags: Fragment;
TRINITY_DN184403_c4_g2	107.199	36.1	1.57	0.000256	0.0172	up	GO:0005524,ATP binding	K03283: HSPA1s; heat shock 70kDa protein 1/2/6/8	SPAC13G7.02c	gb|AFK44414.1|	HSP7C_PETHY, RecName: Full=Heat shock cognate 70 kDa protein;	I3SVX2_LOTJA, SubName: Full=Uncharacterized protein {ECO:0000313|EMBL:AFK44414.1};
TRINITY_DN187371_c1_g1	52.4978	8.24391	2.71	0.000257	0.0172	up	--	--	YFL014w	gb|POE66144.1|	--	A0A0D6R409_ARACU, SubName: Full=Uncharacterized protein {ECO:0000313|EMBL:JAG97441.1};
TRINITY_DN199202_c1_g1	57.4809	152.296	-1.4	0.000257	0.0172	down	--	--	--	ref|XP_003580392.1|	--	A0A0Q3IDM3_BRADI, SubName: Full=Uncharacterized protein {ECO:0000313|EMBL:KQJ84208.1};
TRINITY_DN169257_c0_g2	3.25448	62.0293	-4.24	0.000257	0.0172	down	--	--	--	gb|POF26420.1|	--	--
TRINITY_DN171385_c0_g3	95.4658	15.822	2.59	0.000258	0.0172	up	--	--	--	--	--	--
TRINITY_DN187952_c1_g3	114.751	267.475	-1.22	0.000258	0.0173	down	--	--	At5g17640	ref|XP_020170076.1|	--	W5GUG3_WHEAT, SubName: Full=Uncharacterized protein {ECO:0000313|EnsemblPlants:TRIAE_CS42_6DL_TGACv1_527083_AA1698280.2};
TRINITY_DN195868_c0_g1	25.702	0	7.18	0.00026	0.0173	up	--	--	--	--	--	--
TRINITY_DN186502_c1_g1	52.8662	1.3072	5.23	0.000262	0.0175	up	--	--	--	gb|EAZ15506.1|	--	I1I282_BRADI, SubName: Full=Uncharacterized protein {ECO:0000313|EnsemblPlants:BRADI3G18770.1};
TRINITY_DN199189_c0_g3	7.08631	33.7338	-2.26	0.000263	0.0175	down	--	--	--	--	--	--
TRINITY_DN196333_c0_g12	27.2119	3.03242	3.21	0.000264	0.0176	up	--	K00953: FLAD1; FAD synthetase [EC:2.7.7.2]	At5g03430_2	ref|XP_006645728.1|	--	J3KYF9_ORYBR, SubName: Full=Uncharacterized protein {ECO:0000313|EnsemblPlants:OB01G20150.1};
TRINITY_DN180913_c8_g4	22.7057	3.22134	2.84	0.000266	0.0176	up	GO:0005759,mitochondrial matrix; GO:0004029,aldehyde dehydrogenase (NAD) activity	K00128: ALDH; aldehyde dehydrogenase (NAD+) [EC:1.2.1.3]	Hs11436533	gb|AUF72237.1|	AL2B7_ARATH, RecName: Full=Aldehyde dehydrogenase family 2 member B7, mitochondrial; Short=ALDH2b; EC=1.2.1.3; Flags: Precursor;	A0A2H4Z9T8_9BRYO, SubName: Full=Aldehyde dehydrogenase 2F1 {ECO:0000313|EMBL:AUF72237.1};
TRINITY_DN195606_c0_g1	23.7564	100.297	-2.08	0.000267	0.0177	down	GO:0043231,intracellular membrane-bounded organelle; GO:0004519,endonuclease activity; GO:0003723,RNA binding; GO:0009451,RNA modification	K01176: AMY, amyA, malS; alpha-amylase [EC:3.2.1.1]	At4g21300	gb|KQK12265.1|	PP333_ARATH, RecName: Full=Pentatricopeptide repeat-containing protein At4g21300;	A0A0Q3KMB3_BRADI, SubName: Full=Uncharacterized protein {ECO:0000313|EMBL:KQK12265.1};
TRINITY_DN189037_c2_g4	4.31332	38.968	-3.17	0.000268	0.0178	down	--	--	--	--	--	--
TRINITY_DN176516_c2_g2	247.906	93.3903	1.41	0.00027	0.0178	up	--	--	--	--	--	--
TRINITY_DN201696_c3_g1	263.071	0	10.54	0.000272	0.018	up	--	--	--	--	--	--
TRINITY_DN191756_c0_g2	32.6632	78.582	-1.27	0.000273	0.018	down	--	K18134: EOGT; EGF domain-specific O-GlcNAc transferase [EC:2.4.1.255]	At3g18180	dbj|BAJ95901.1|	--	A0A1D6C2X1_WHEAT, SubName: Full=Uncharacterized protein {ECO:0000313|EnsemblPlants:TRIAE_CS42_7BL_TGACv1_576941_AA1860590.1};
TRINITY_DN186139_c0_g1	20.0526	0	6.82	0.000274	0.018	up	--	--	--	--	--	--
TRINITY_DN195668_c0_g1	32.7434	6.25324	2.39	0.000279	0.0184	up	--	--	--	gb|POE62385.1|	--	F2E0R1_HORVV, SubName: Full=Predicted protein {ECO:0000313|EMBL:BAK00933.1};
TRINITY_DN191706_c1_g12	57.5041	23.6867	1.26	0.000283	0.0186	up	--	--	--	--	--	--
TRINITY_DN182339_c1_g2	321.42	106.125	1.6	0.000284	0.0186	up	GO:0005829,cytosol; GO:0004029,aldehyde dehydrogenase (NAD) activity; GO:0050269,coniferyl-aldehyde dehydrogenase activity; GO:0009699,phenylpropanoid biosynthetic process	K12355: REF1; coniferyl-aldehyde dehydrogenase [EC:1.2.1.68]	SPAC9E9.09c	gb|AUF72237.1|	AL2C4_ARATH, RecName: Full=Aldehyde dehydrogenase family 2 member C4; EC=1.2.1.3; AltName: Full=ALDH1a; AltName: Full=Protein REDUCED EPIDERMAL FLUORESCENCE 1;	A0A2H4Z9T8_9BRYO, SubName: Full=Aldehyde dehydrogenase 2F1 {ECO:0000313|EMBL:AUF72237.1};
TRINITY_DN136809_c0_g1	72.1362	1.93354	5.22	0.000284	0.0186	up	--	--	--	--	--	--
TRINITY_DN176863_c4_g1	40.8677	2.12297	4.32	0.000285	0.0187	up	GO:0005524,ATP binding	K03283: HSPA1s; heat shock 70kDa protein 1/2/6/8	SPCC1739.13	gb|AAR17079.1|	HSP70_ACHKL, RecName: Full=Heat shock 70 kDa protein;	A0A1D1XMM0_9ARAE, SubName: Full=Heat shock protein {ECO:0000313|EMBL:JAT43623.1}; Flags: Fragment;
TRINITY_DN196516_c0_g1	27.9865	73.3897	-1.4	0.000286	0.0187	down	--	--	At3g17920	ref|XP_010228955.1|	--	I1H7Y9_BRADI, SubName: Full=Uncharacterized protein {ECO:0000313|EMBL:KQK22836.1, ECO:0000313|EnsemblPlants:BRADI1G69590.1};
TRINITY_DN177588_c0_g1	23.4799	3.92265	2.55	0.000287	0.0187	up	GO:0005829,cytosol; GO:0005886,plasma membrane; GO:0005524,ATP binding; GO:0005525,GTP binding; GO:0016787,hydrolase activity; GO:0046872,metal ion binding; GO:1901001,negative regulation of response to salt stress; GO:0009651,response to salt stress	K19788: OLA1; obg-like ATPase 1	SPAC27E2.03c	gb|POE54894.1|	OLA1_ORYSI, RecName: Full=Obg-like ATPase 1 {ECO:0000255|HAMAP-Rule:MF_03167}; AltName: Full=Ribosome-binding ATPase YchF; Short=OsYchF1;	A0A1D1YEG9_9ARAE, SubName: Full=Putative GTP-binding protein C27E2.03c {ECO:0000313|EMBL:JAT53055.1}; Flags: Fragment;
TRINITY_DN174238_c1_g2	203.169	89.8593	1.17	0.000291	0.019	up	--	--	--	--	--	--
TRINITY_DN186411_c0_g3	0	30.6491	-7.37	0.000291	0.019	down	--	--	--	--	--	--
TRINITY_DN201365_c3_g2	0	23.6871	-7	0.000296	0.0193	down	--	K13457: RPM1, RPS3; disease resistance protein RPM1	--	ref|XP_014758689.1|	--	A0A0Q3HUD0_BRADI, SubName: Full=Uncharacterized protein {ECO:0000313|EMBL:KQJ91907.1};
TRINITY_DN183521_c0_g2	0	293.148	-10.63	0.000296	0.0193	down	--	--	--	--	--	--
TRINITY_DN182057_c3_g5	40.4859	9.22852	2.1	0.000296	0.0193	up	GO:0048046,apoplast; GO:0005618,cell wall; GO:0005829,cytosol; GO:0005794,Golgi apparatus; GO:0005739,mitochondrion; GO:0005634,nucleus; GO:0005886,plasma membrane; GO:0005774,vacuolar membrane; GO:0005524,ATP binding; GO:0031625,ubiquitin protein ligase binding; GO:0016567,protein ubiquitination; GO:0006355,regulation of transcription, DNA-templated; GO:0009617,response to bacterium; GO:0046686,…	K03283: HSPA1s; heat shock 70kDa protein 1/2/6/8	YLL024c	gb|AAN87001.1|	MD37C_ARATH, RecName: Full=Probable mediator of RNA polymerase II transcription subunit 37c; AltName: Full=Heat shock 70 kDa protein 4; AltName: Full=Heat shock cognate 70 kDa protein 4; AltName: Full=Heat shock cognate protein 70-4; Short=AtHsc70-4; AltName: Full=Heat shock protein 70-4; Short=AtHsp70-4;	A0A1D1XH60_9ARAE, SubName: Full=Heat shock protein HSS1 {ECO:0000313|EMBL:JAT41735.1}; Flags: Fragment;
TRINITY_DN177507_c1_g3	23.5325	0	7.05	0.000297	0.0193	up	--	--	--	--	--	--
TRINITY_DN177782_c0_g3	46.2602	7.6375	2.62	0.000301	0.0195	up	--	--	--	--	--	--
TRINITY_DN159019_c0_g1	0	17.4558	-6.56	0.000302	0.0196	down	--	--	--	--	--	--
TRINITY_DN168617_c1_g3	22.1176	1.3072	3.93	0.000303	0.0196	up	GO:0031305,integral component of mitochondrial inner membrane; GO:0005743,mitochondrial inner membrane; GO:0005744,mitochondrial inner membrane presequence translocase complex; GO:0005741,mitochondrial outer membrane; GO:0005739,mitochondrion; GO:0030150,protein import into mitochondrial matrix	K17795: TIM17; mitochondrial import inner membrane translocase subunit TIM17	YJL143w	gb|POF17886.1|	TI172_ARATH, RecName: Full=Mitochondrial import inner membrane translocase subunit TIM17-2;	R7QSY8_CHOCR, SubName: Full=Uncharacterized protein {ECO:0000313|EMBL:CDF40848.1};
TRINITY_DN193070_c1_g1	155.747	5.05997	4.97	0.000304	0.0197	up	--	--	--	--	--	--
TRINITY_DN172650_c0_g2	52.9542	1.47742	5.04	0.000304	0.0197	up	--	--	--	--	--	--
TRINITY_DN198030_c2_g3	202.628	44.2028	2.19	0.000306	0.0198	up	GO:0016021,integral component of membrane; GO:0005886,plasma membrane; GO:0005524,ATP binding; GO:0005516,calmodulin binding; GO:0030246,carbohydrate binding; GO:0004674,protein serine/threonine kinase activity; GO:0006468,protein phosphorylation; GO:0048544,recognition of pollen	K04733: IRAK4; interleukin-1 receptor-associated kinase 4 [EC:2.7.11.1]	At4g21390	gb|PNT61915.1|	B120_ARATH, RecName: Full=G-type lectin S-receptor-like serine/threonine-protein kinase B120; EC=2.7.11.1; Flags: Precursor;	A0A0Q3EAD2_BRADI, SubName: Full=Uncharacterized protein {ECO:0000313|EMBL:KQJ84806.1};
TRINITY_DN200295_c0_g4	17.8322	72.682	-2.02	0.000307	0.0198	down	--	K00784: rnz; ribonuclease Z [EC:3.1.26.11]	At4g19080	gb|KXG31619.1|	--	A0A1B6Q127_SORBI, SubName: Full=Uncharacterized protein {ECO:0000313|EMBL:KXG31619.1};
TRINITY_DN179254_c2_g1	16.4898	0.322256	5.58	0.000308	0.0198	up	--	--	--	gb|POF20118.1|	--	--
TRINITY_DN176093_c0_g1	52.7101	14.5344	1.83	0.000308	0.0198	up	--	--	--	--	--	--
TRINITY_DN198917_c1_g2	688.356	237.321	1.54	0.000308	0.0198	up	GO:0016021,integral component of membrane; GO:0005886,plasma membrane; GO:0005516,calmodulin binding; GO:0006952,defense response; GO:0009607,response to biotic stimulus	K08472: MLO; mlo protein	At4g02600	ref|XP_003575162.1|	MLO1_ARATH, RecName: Full=MLO-like protein 1; Short=AtMlo1; AltName: Full=MLO protein homolog 1; Short=AtMlo-H1;	I1IAM1_BRADI, RecName: Full=MLO-like protein {ECO:0000256|RuleBase:RU280816};
TRINITY_DN180069_c0_g1	8.46575	43.9789	-2.39	0.000314	0.0201	down	GO:0005794,Golgi apparatus; GO:0016021,integral component of membrane; GO:0005886,plasma membrane; GO:0016760,cellulose synthase (UDP-forming) activity; GO:0016759,cellulose synthase activity; GO:0046872,metal ion binding; GO:0071555,cell wall organization; GO:0030244,cellulose biosynthetic process; GO:0009833,plant-type primary cell wall biogenesis; GO:0009834,plant-type secondary cell wall biog…	K10999: CESA; cellulose synthase A [EC:2.4.1.12]	At5g44030	ref|XP_020198383.1|	CESA7_ORYSJ, RecName: Full=Cellulose synthase A catalytic subunit 7 [UDP-forming]; EC=2.4.1.12; AltName: Full=OsCesA7;	A0A1D5SWS4_WHEAT, SubName: Full=Uncharacterized protein {ECO:0000313|EnsemblPlants:TRIAE_CS42_1DL_TGACv1_062651_AA0217770.1};
TRINITY_DN174413_c0_g1	39.5532	7.08719	2.5	0.000315	0.0202	up	--	--	--	--	--	--
TRINITY_DN188766_c0_g2	29.6842	6.70779	2.1	0.000321	0.0205	up	--	K11153: RDH12; retinol dehydrogenase 12 [EC:1.1.1.300]	--	dbj|BAK05401.1|	--	F2EDH9_HORVV, SubName: Full=Predicted protein {ECO:0000313|EMBL:BAK05401.1};
TRINITY_DN173850_c2_g2	27.325	1.55396	4.13	0.000323	0.0206	up	--	--	--	gb|POF12832.1|	--	A0A1D1YK56_9ARAE, SubName: Full=Rhamnolipids biosynthesis 3-oxoacyl-[acyl-carrier-protein] reductase {ECO:0000313|EMBL:JAT55029.1}; Flags: Fragment;
TRINITY_DN196506_c1_g1	0.648073	66.2293	-6.65	0.000326	0.0207	down	--	--	--	--	--	--
TRINITY_DN182448_c0_g1	21.1504	0.246237	5.94	0.000327	0.0208	up	--	--	--	--	--	--
TRINITY_DN199568_c0_g1	424.027	21.7385	4.29	0.000328	0.0208	up	--	--	--	gb|PLY80414.1|	--	--
TRINITY_DN176963_c0_g2	0	31.7282	-7.42	0.000329	0.0209	down	GO:0005576,extracellular region; GO:0004190,aspartic-type endopeptidase activity	K01381: PEP4; saccharopepsin [EC:3.4.23.25]	At2g03200	ref|XP_020196942.1|	NEP1_NEPGR, RecName: Full=Aspartic proteinase nepenthesin-1; EC=3.4.23.12; AltName: Full=Nepenthesin-I; Flags: Precursor;	A0A1D5ZPY7_WHEAT, SubName: Full=Uncharacterized protein {ECO:0000313|EnsemblPlants:TRIAE_CS42_5DL_TGACv1_433904_AA1424930.1};
TRINITY_DN182057_c3_g3	135.406	32.3436	2.05	0.000329	0.0209	up	GO:0048046,apoplast; GO:0005618,cell wall; GO:0005829,cytosol; GO:0005794,Golgi apparatus; GO:0005739,mitochondrion; GO:0005634,nucleus; GO:0005886,plasma membrane; GO:0005774,vacuolar membrane; GO:0005524,ATP binding; GO:0031625,ubiquitin protein ligase binding; GO:0016567,protein ubiquitination; GO:0006355,regulation of transcription, DNA-templated; GO:0009617,response to bacterium; GO:0046686,…	K03283: HSPA1s; heat shock 70kDa protein 1/2/6/8	SPCC1739.13	gb|AAN87001.1|	MD37C_ARATH, RecName: Full=Probable mediator of RNA polymerase II transcription subunit 37c; AltName: Full=Heat shock 70 kDa protein 4; AltName: Full=Heat shock cognate 70 kDa protein 4; AltName: Full=Heat shock cognate protein 70-4; Short=AtHsc70-4; AltName: Full=Heat shock protein 70-4; Short=AtHsp70-4;	Q8GUW2_POPAL, SubName: Full=HSP70 {ECO:0000313|EMBL:AAN87001.1}; Flags: Fragment;
TRINITY_DN188317_c1_g4	40.3541	2.57735	4.06	0.00033	0.0209	up	GO:0009507,chloroplast; GO:0005829,cytosol; GO:0022625,cytosolic large ribosomal subunit; GO:0022626,cytosolic ribosome; GO:0005730,nucleolus; GO:0005634,nucleus; GO:0009506,plasmodesma; GO:0005773,vacuole; GO:0019843,rRNA binding; GO:0003735,structural constituent of ribosome; GO:0008270,zinc ion binding; GO:0009409,response to cold; GO:0000027,ribosomal large subunit assembly; GO:0006412,transl…	K02870: RP-L12e, RPL12; large subunit ribosomal protein L12e	Hs4506597	gb|POE67117.1|	RL121_ARATH, RecName: Full=60S ribosomal protein L12-1;	A0A1D1Y1S0_9ARAE, SubName: Full=60S ribosomal protein L12 {ECO:0000313|EMBL:JAT48592.1};
TRINITY_DN190905_c0_g4	2958.73	0	14.03	0.00033	0.0209	up	GO:0016021,integral component of membrane; GO:0015171,amino acid transmembrane transporter activity; GO:0003333,amino acid transmembrane transport	K15015: SLC32A, VGAT; solute carrier family 32 (vesicular inhibitory amino acid transporter)	At5g15240	gb|EMS49092.1|	AVT1J_ARATH, RecName: Full=Amino acid transporter AVT1J {ECO:0000305}; Short=AtAvt1J {ECO:0000303|PubMed:27925655};	M7YNY9_TRIUA, SubName: Full=Uncharacterized protein {ECO:0000313|EMBL:EMS49092.1, ECO:0000313|EnsemblPlants:TRIUR3_23690-P1};
TRINITY_DN173886_c0_g1	18.5739	2.63415	2.86	0.000332	0.021	up	--	K22211: GLX3, HSP31; D-lactate dehydratase [EC:4.2.1.130]	YDR533c	ref|XP_011398323.1|	--	A0A087SI74_AUXPR, SubName: Full=Putative chaperone protein HSP31 {ECO:0000313|EMBL:KFM25428.1};
TRINITY_DN160854_c0_g1	26.1207	4.66188	2.48	0.000333	0.021	up	GO:0005618,cell wall; GO:0009507,chloroplast; GO:0022625,cytosolic large ribosomal subunit; GO:0022626,cytosolic ribosome; GO:0005886,plasma membrane; GO:0009506,plasmodesma; GO:0003735,structural constituent of ribosome; GO:0009735,response to cytokinin; GO:0006412,translation	K02903: RP-L28e, RPL28; large subunit ribosomal protein L28e	SPAC1687.06c	gb|PNH10998.1|	RL281_ARATH, RecName: Full=60S ribosomal protein L28-1;	L1JIS0_GUITH, SubName: Full=Large subunit ribosomal protein L28e, cytoplasmic {ECO:0000313|EMBL:EKX47990.1};
TRINITY_DN181616_c1_g1	84.331	20.5012	2.02	0.000336	0.0212	up	--	--	--	--	--	--
TRINITY_DN172216_c1_g1	43.6538	1.06097	5.25	0.000337	0.0212	up	--	--	--	ref|XP_020149447.1|	--	W5BDM0_WHEAT, SubName: Full=Uncharacterized protein {ECO:0000313|EnsemblPlants:TRIAE_CS42_2BL_TGACv1_129709_AA0393390.1};
TRINITY_DN155580_c0_g1	30.0561	1.62946	4.11	0.000342	0.0215	up	GO:0005737,cytoplasm; GO:0004177,aminopeptidase activity; GO:0008237,metallopeptidase activity; GO:0008270,zinc ion binding	K01267: DNPEP; aspartyl aminopeptidase [EC:3.4.11.21]	YHR113w	gb|AFK46082.1|	DNPEP_RICCO, RecName: Full=Probable aspartyl aminopeptidase; EC=3.4.11.21;	I3T0P0_LOTJA, SubName: Full=Uncharacterized protein {ECO:0000313|EMBL:AFK46082.1};
TRINITY_DN191735_c2_g2	55.3579	5.42033	3.38	0.000345	0.0217	up	GO:0005618,cell wall; GO:0009941,chloroplast envelope; GO:0009570,chloroplast stroma; GO:0005856,cytoskeleton; GO:0005829,cytosol; GO:0005739,mitochondrion; GO:0005730,nucleolus; GO:0005886,plasma membrane; GO:0009506,plasmodesma; GO:0005524,ATP binding; GO:0005200,structural constituent of cytoskeleton; GO:0051301,cell division; GO:0009733,response to auxin; GO:0009416,response to light stimulus…	K10355: ACTF; actin, other eukaryote	At5g09810	gb|ACT82771.1|	ACT7_ARATH, RecName: Full=Actin-7; AltName: Full=Actin-2;	C7ENV6_TOBAC, SubName: Full=Actin {ECO:0000313|EMBL:ACT82771.1}; Flags: Fragment;
TRINITY_DN184426_c0_g2	47.5107	10.6313	2.19	0.000347	0.0217	up	--	--	SPAC343.12	gb|POF12756.1|	--	--
TRINITY_DN177528_c0_g1	499.651	240.707	1.06	0.000349	0.0218	up	--	K13457: RPM1, RPS3; disease resistance protein RPM1	--	gb|ADM65823.1|	--	A0A1D5SMN9_WHEAT, SubName: Full=Uncharacterized protein {ECO:0000313|EnsemblPlants:TRIAE_CS42_1BS_TGACv1_050506_AA0172880.1};
TRINITY_DN192822_c0_g1	41.3398	10.8777	1.92	0.000353	0.0221	up	--	--	--	ref|XP_022684588.1|	--	K3ZIM4_SETIT, SubName: Full=Uncharacterized protein {ECO:0000313|EMBL:KQK94860.1, ECO:0000313|EnsemblPlants:Si026426m};
TRINITY_DN175933_c0_g1	60.7094	12.9605	2.21	0.000353	0.0221	up	--	--	--	--	--	--
TRINITY_DN178420_c2_g2	24.3143	82.5112	-1.76	0.000359	0.0224	down	GO:0005634,nucleus; GO:0003700,DNA binding transcription factor activity; GO:0008270,zinc ion binding; GO:0007623,circadian rhythm; GO:0048579,negative regulation of long-day photoperiodism, flowering; GO:0006355,regulation of transcription, DNA-templated	K12135: CO; zinc finger protein CONSTANS	At3g07650	ref|XP_003570474.1|	COL9_ARATH, RecName: Full=Zinc finger protein CONSTANS-LIKE 9;	I1IEC5_BRADI, SubName: Full=Uncharacterized protein {ECO:0000313|EnsemblPlants:BRADI3G56490.2};
TRINITY_DN190847_c0_g1	31.7297	5.91228	2.42	0.000362	0.0226	up	--	--	--	--	--	--
TRINITY_DN179343_c3_g2	852.753	1871.23	-1.13	0.000365	0.0227	down	--	--	--	--	--	--
TRINITY_DN201207_c2_g1	142.47	42.5394	1.73	0.00037	0.023	up	GO:0005737,cytoplasm; GO:0005886,plasma membrane; GO:0043531,ADP binding; GO:0005524,ATP binding; GO:0009814,defense response, incompatible interaction; GO:0009626,plant-type hypersensitive response; GO:0007165,signal transduction	K13457: RPM1, RPS3; disease resistance protein RPM1	At3g46530	ref|XP_020182271.1|	RPP13_ARATH, RecName: Full=Disease resistance protein RPP13; AltName: Full=Resistance to Peronospora parasitica protein 13;	A0A1D5SJ58_WHEAT, SubName: Full=Uncharacterized protein {ECO:0000313|EnsemblPlants:TRIAE_CS42_1BS_TGACv1_049464_AA0154200.1};
TRINITY_DN198866_c0_g2	75.7217	16.4296	2.21	0.00037	0.023	up	--	--	--	--	--	--
TRINITY_DN189409_c3_g4	60.667	218.801	-1.85	0.000374	0.0232	down	--	--	--	--	--	--
TRINITY_DN194238_c2_g1	36.2985	99.1871	-1.46	0.000375	0.0232	down	--	--	--	--	--	--
TRINITY_DN34652_c0_g1	23.3802	0	7.05	0.000379	0.0235	up	--	--	--	--	--	--
TRINITY_DN170098_c6_g1	259.898	119.866	1.12	0.00038	0.0235	up	--	K22464: FAP; fatty acid photodecarboxylase [EC:4.1.1.106]	Hs18556423	gb|POE71338.1|	--	H3H2J9_PHYRM, SubName: Full=Uncharacterized protein {ECO:0000313|EnsemblProtists:Phyra84615};
TRINITY_DN180460_c0_g1	21.0473	2.86116	2.8	0.000382	0.0236	up	--	--	--	--	--	--
TRINITY_DN183787_c0_g1	14.9479	100.976	-2.76	0.000385	0.0238	down	--	--	--	--	--	--
TRINITY_DN185831_c2_g3	11890.9	1932.26	2.62	0.000386	0.0238	up	--	--	--	--	--	--
TRINITY_DN185964_c0_g2	9.37901	124.269	-3.73	0.000391	0.0241	down	--	--	--	--	--	--
TRINITY_DN186934_c2_g5	67.7744	9.36168	2.86	0.000391	0.0241	up	--	--	--	--	--	--
TRINITY_DN201696_c2_g3	107.853	8.39543	3.7	0.000391	0.0241	up	--	K04733: IRAK4; interleukin-1 receptor-associated kinase 4 [EC:2.7.11.1]	--	gb|PNT61927.1|	--	A0A287JKQ0_HORVV, SubName: Full=Serine/threonine-protein kinase {ECO:0000313|EnsemblPlants:HORVU2Hr1G117290.13};
TRINITY_DN185693_c2_g2	42.5461	3.71433	3.55	0.000392	0.0241	up	--	--	--	--	--	--
TRINITY_DN170542_c0_g2	28.9058	1.38322	4.29	0.000395	0.0242	up	--	--	--	--	--	--
TRINITY_DN182014_c0_g1	132.154	62.7102	1.09	0.000396	0.0243	up	--	--	--	--	--	--
TRINITY_DN193734_c7_g4	0	53.1744	-8.17	0.000401	0.0246	down	--	--	--	--	--	--
TRINITY_DN181319_c1_g4	0	27.7107	-7.22	0.000404	0.0247	down	--	--	--	--	--	--
TRINITY_DN178001_c2_g2	22.8177	0.738711	4.73	0.00041	0.025	up	--	--	--	--	--	--
TRINITY_DN182382_c0_g1	0	52.4539	-8.15	0.000411	0.025	down	--	--	--	--	--	--
TRINITY_DN175050_c0_g1	22.4081	0	6.98	0.000412	0.0251	up	--	--	--	--	--	--
TRINITY_DN190091_c1_g1	47.0915	14.022	1.73	0.000415	0.0252	up	--	--	--	--	--	--
TRINITY_DN181077_c2_g1	50.9823	1.30772	5.3	0.000419	0.0255	up	--	--	--	--	--	--
TRINITY_DN198389_c0_g3	2.30302	44.5971	-4.27	0.000421	0.0256	down	GO:0005634,nucleus; GO:0006355,regulation of transcription, DNA-templated; GO:0006351,transcription, DNA-templated	K05909: E1.10.3.2; laccase [EC:1.10.3.2]	At5g05800	gb|PNT75759.1|	LIMYB_ARATH, RecName: Full=L10-interacting MYB domain-containing protein {ECO:0000303|PubMed:25707794};	A0A0Q3H514_BRADI, SubName: Full=Uncharacterized protein {ECO:0000313|EMBL:KQK17944.1}; Flags: Fragment;
TRINITY_DN196893_c2_g4	265.205	40.0137	2.72	0.000425	0.0258	up	--	--	--	--	--	--
TRINITY_DN178188_c5_g2	0	233.766	-10.3	0.000429	0.026	down	--	--	--	--	--	--
TRINITY_DN188006_c0_g4	20.5439	0	6.86	0.000432	0.0261	up	--	--	--	--	--	--
TRINITY_DN180048_c4_g4	93.3719	191.681	-1.04	0.000434	0.0262	down	GO:0005634,nucleus; GO:0046872,metal ion binding; GO:0016740,transferase activity; GO:0006952,defense response; GO:0043161,proteasome-mediated ubiquitin-dependent protein catabolic process; GO:0043067,regulation of programmed cell death	K19042: BOI; E3 ubiquitin-protein ligase BOI and related proteins [EC:2.3.2.27]	At3g12920	gb|EMS54504.1|	BRG3_ARATH, RecName: Full=Probable BOI-related E3 ubiquitin-protein ligase 3; EC=2.3.2.27 {ECO:0000250|UniProtKB:Q9FHE4}; AltName: Full=RING-type E3 ubiquitin transferase BRG3 {ECO:0000305};	A0A1D5T7A1_WHEAT, SubName: Full=Uncharacterized protein {ECO:0000313|EnsemblPlants:TRIAE_CS42_2AL_TGACv1_093287_AA0276710.1};
TRINITY_DN171297_c0_g2	331.414	29.0864	3.51	0.000434	0.0262	up	--	K13457: RPM1, RPS3; disease resistance protein RPM1	--	emb|CDM80676.1|	--	A0A1D5UT50_WHEAT, SubName: Full=Uncharacterized protein {ECO:0000313|EnsemblPlants:TRIAE_CS42_2DL_TGACv1_161306_AA0557860.1};
TRINITY_DN182201_c0_g1	0	16.2394	-6.46	0.000434	0.0262	down	--	--	--	--	--	--
TRINITY_DN180251_c0_g1	97.7931	28.1566	1.77	0.000438	0.0264	up	GO:0043231,intracellular membrane-bounded organelle; GO:0080043,quercetin 3-O-glucosyltransferase activity; GO:0080044,quercetin 7-O-glucosyltransferase activity; GO:0008152,metabolic process	--	At2g36780	gb|ACD03247.1|	U73C3_ARATH, RecName: Full=UDP-glycosyltransferase 73C3; EC=2.4.1.-;	C4MF44_9POAL, RecName: Full=Glycosyltransferase {ECO:0000256|RuleBase:RU362057}; EC=2.4.1.- {ECO:0000256|RuleBase:RU362057};
TRINITY_DN198855_c0_g3	315.76	127.069	1.31	0.00044	0.0265	up	--	--	--	gb|EMS60905.1|	--	A0A1D5ZI10_WHEAT, SubName: Full=Uncharacterized protein {ECO:0000313|EnsemblPlants:TRIAE_CS42_5BS_TGACv1_424687_AA1391330.4};
TRINITY_DN191992_c1_g5	0	223.17	-10.24	0.000443	0.0266	down	GO:0005576,extracellular region; GO:0004190,aspartic-type endopeptidase activity	K22683: APF2; aspartyl protease family protein [EC:3.4.23.-]	At2g03200	ref|XP_010237501.2|	NEP2_NEPGR, RecName: Full=Aspartic proteinase nepenthesin-2; EC=3.4.23.12; AltName: Full=Nepenthesin-II; Flags: Precursor;	I1IJZ5_BRADI, SubName: Full=Uncharacterized protein {ECO:0000313|EMBL:KQJ87594.1, ECO:0000313|EnsemblPlants:BRADI4G12160.1};
TRINITY_DN174457_c3_g3	334.292	90.3477	1.89	0.000444	0.0267	up	--	K22464: FAP; fatty acid photodecarboxylase [EC:4.1.1.106]	7293018	ref|XP_015871580.1|	--	F0Y388_AURAN, SubName: Full=Uncharacterized protein {ECO:0000313|EMBL:EGB10292.1}; Flags: Fragment;
TRINITY_DN177011_c4_g1	5.67899	190.729	-5.07	0.000446	0.0268	down	--	--	--	--	--	--
TRINITY_DN196676_c2_g1	21.6472	0	6.93	0.000452	0.0271	up	GO:0005737,cytoplasm; GO:0005524,ATP binding; GO:0004356,glutamate-ammonia ligase activity; GO:0006542,glutamine biosynthetic process	K01915: glnA, GLUL; glutamine synthetase [EC:6.3.1.2]	SPAC23H4.06	gb|POE56390.1|	GLNA_PINSY, RecName: Full=Glutamine synthetase cytosolic isozyme; EC=6.3.1.2; AltName: Full=GS1; AltName: Full=Glutamate--ammonia ligase;	A0A0D6R0Z6_ARACU, RecName: Full=Glutamine synthetase {ECO:0000256|RuleBase:RU004356}; EC=6.3.1.2 {ECO:0000256|RuleBase:RU004356};
TRINITY_DN199803_c1_g1	33.9389	2.69095	3.62	0.000453	0.0272	up	--	--	--	--	--	--
TRINITY_DN178215_c1_g1	95.175	47.0718	1.02	0.000454	0.0272	up	GO:0005789,endoplasmic reticulum membrane; GO:0000139,Golgi membrane; GO:0005886,plasma membrane; GO:0043531,ADP binding; GO:0005524,ATP binding; GO:0030275,LRR domain binding; GO:0006952,defense response; GO:0009817,defense response to fungus, incompatible interaction; GO:0002239,response to oomycetes; GO:0007165,signal transduction	K15078: SLX1; structure-specific endonuclease subunit SLX1 [EC:3.6.1.-]	At3g04220	emb|CZT14023.1|	RPP1_ARATH, RecName: Full=Probable disease resistance protein RPP1 {ECO:0000305}; AltName: Full=Protein RECOGNITION OF PERONOSPORA PARASITICA 1 {ECO:0000305};	A0A0E0J7Z5_ORYNI, SubName: Full=Uncharacterized protein {ECO:0000313|EnsemblPlants:ONIVA12G05740.4};
TRINITY_DN174227_c0_g2	33.5004	6.0451	2.45	0.000456	0.0273	up	GO:0031225,anchored component of membrane; GO:0046658,anchored component of plasma membrane; GO:0005886,plasma membrane; GO:0008289,lipid binding; GO:0042335,cuticle development; GO:0006869,lipid transport	--	At2g48130	ref|XP_020180414.1|	LTPG2_ARATH, RecName: Full=Non-specific lipid transfer protein GPI-anchored 2; Short=AtLTPG-2; Short=Protein LTP-GPI-ANCHORED 2; AltName: Full=Xylogen-like protein 5; Short=AtXYP5; Flags: Precursor;	W5A8U3_WHEAT, SubName: Full=Uncharacterized protein {ECO:0000313|EnsemblPlants:TRIAE_CS42_1BS_TGACv1_050183_AA0168720.1};
TRINITY_DN181417_c2_g7	21.3121	4.01789	2.46	0.000457	0.0273	up	GO:0016021,integral component of membrane; GO:0005886,plasma membrane; GO:0005524,ATP binding; GO:0030246,carbohydrate binding; GO:0004674,protein serine/threonine kinase activity; GO:0009751,response to salicylic acid	K04733: IRAK4; interleukin-1 receptor-associated kinase 4 [EC:2.7.11.1]	At2g37710	ref|NP_001147835.2|	LRK41_ARATH, RecName: Full=L-type lectin-domain containing receptor kinase IV.1; Short=Arabidopsis thaliana lectin-receptor kinase e; Short=AthlecRK-e; Short=LecRK-IV.1; EC=2.7.11.1; AltName: Full=Lectin Receptor Kinase 1; Flags: Precursor;	A0A1D6LA05_MAIZE, SubName: Full=Lectin-like receptor kinase 7 {ECO:0000313|EMBL:ONM10968.1};
TRINITY_DN154911_c0_g1	16.2838	0	6.52	0.000459	0.0274	up	--	--	--	--	--	--
TRINITY_DN175449_c0_g1	386.076	145.474	1.41	0.00046	0.0275	up	--	--	--	--	--	--
TRINITY_DN201325_c4_g3	1111.91	54.5494	4.35	0.000462	0.0276	up	GO:0016021,integral component of membrane; GO:0005886,plasma membrane; GO:0005524,ATP binding; GO:0004674,protein serine/threonine kinase activity	K04730: IRAK1; interleukin-1 receptor-associated kinase 1 [EC:2.7.11.1]	At3g47570	ref|XP_012699890.1|	Y3475_ARATH, RecName: Full=Probable LRR receptor-like serine/threonine-protein kinase At3g47570; EC=2.7.11.1; Flags: Precursor;	A0A1D6ATG6_WHEAT, SubName: Full=Uncharacterized protein {ECO:0000313|EnsemblPlants:TRIAE_CS42_6BL_TGACv1_502074_AA1622850.1};
TRINITY_DN197917_c0_g1	404.4	176.996	1.19	0.000472	0.0281	up	GO:0005783,endoplasmic reticulum; GO:0005788,endoplasmic reticulum lumen; GO:0005789,endoplasmic reticulum membrane; GO:0005509,calcium ion binding; GO:0030246,carbohydrate binding; GO:0051082,unfolded protein binding; GO:0046283,anthocyanin-containing compound metabolic process; GO:0010204,defense response signaling pathway, resistance gene-independent; GO:0042742,defense response to bacterium; …	K08057: CALR; calreticulin	At1g08450	dbj|BAS75699.1|	CALR3_ARATH, RecName: Full=Calreticulin-3; AltName: Full=Protein PRIORITY IN SWEET LIFE 1; Flags: Precursor;	A0A287M7F3_HORVV, SubName: Full=Uncharacterized protein {ECO:0000313|EnsemblPlants:HORVU3Hr1G089830.10};
TRINITY_DN197173_c1_g1	41.6825	0.644512	6.02	0.000472	0.0281	up	--	--	--	--	--	--
TRINITY_DN200213_c1_g1	25.6119	0	7.17	0.000475	0.0282	up	--	--	--	--	--	--
TRINITY_DN185824_c2_g2	21.4997	1.80072	3.68	0.000476	0.0283	up	GO:0022625,cytosolic large ribosomal subunit; GO:0022626,cytosolic ribosome; GO:0042788,polysomal ribosome; GO:0003723,RNA binding; GO:0003735,structural constituent of ribosome; GO:0002181,cytoplasmic translation; GO:0042273,ribosomal large subunit biogenesis	K02898: RP-L26e, RPL26; large subunit ribosomal protein L26e	SPBC29B5.03c	gb|POF16309.1|	RL262_ARATH, RecName: Full=60S ribosomal protein L26-2;	A0A199VY89_ANACO, SubName: Full=60S ribosomal protein L26-1 {ECO:0000313|EMBL:OAY81948.1};
TRINITY_DN195466_c1_g2	72.3575	1.61128	5.49	0.000479	0.0284	up	--	--	--	--	--	--
TRINITY_DN159726_c0_g1	24.6372	0.738711	4.85	0.000479	0.0284	up	--	--	--	--	--	--
TRINITY_DN181834_c2_g1	22.7542	77.0517	-1.75	0.000482	0.0285	down	--	--	--	ref|XP_003568014.1|	--	A0A0A9HJY0_ARUDO, SubName: Full=Uncharacterized protein {ECO:0000313|EMBL:JAE36099.1};
TRINITY_DN178668_c0_g3	30.4981	3.90395	2.93	0.000484	0.0287	up	--	K19042: BOI; E3 ubiquitin-protein ligase BOI and related proteins [EC:2.3.2.27]	--	gb|PLY66071.1|	--	A0A251SPQ7_HELAN, SubName: Full=Putative zinc finger, RING/FYVE/PHD-type {ECO:0000313|EMBL:OTG00502.1};
TRINITY_DN170393_c0_g3	25.965	0.568493	5.41	0.000488	0.0289	up	--	--	--	--	--	--
TRINITY_DN200914_c2_g1	54.3799	8.9253	2.63	0.000489	0.0289	up	GO:0005737,cytoplasm; GO:0005730,nucleolus; GO:0005524,ATP binding; GO:0004004,ATP-dependent RNA helicase activity; GO:0003723,RNA binding; GO:0000184,nuclear-transcribed mRNA catabolic process, nonsense-mediated decay; GO:0010501,RNA secondary structure unwinding; GO:0006364,rRNA processing	K12823: DDX5, DBP2; ATP-dependent RNA helicase DDX5/DBP2 [EC:3.6.4.13]	SPBP8B7.16c	gb|POF13320.1|	RH20_ORYSJ, RecName: Full=DEAD-box ATP-dependent RNA helicase 20; EC=3.6.4.13;	D8RNW7_SELML, SubName: Full=Uncharacterized protein {ECO:0000313|EMBL:EFJ26152.1};
TRINITY_DN201078_c3_g2	11.8001	68.0044	-2.52	0.000489	0.0289	down	--	--	--	gb|KQJ81668.2|	--	I1IVW8_BRADI, SubName: Full=Uncharacterized protein {ECO:0000313|EnsemblPlants:BRADI5G02180.1};
TRINITY_DN192492_c1_g2	171.832	0.322256	8.96	0.00049	0.0289	up	GO:0048226,Casparian strip; GO:0016021,integral component of membrane; GO:0005886,plasma membrane; GO:0005524,ATP binding; GO:0004674,protein serine/threonine kinase activity; GO:0071555,cell wall organization; GO:0009793,embryo development ending in seed dormancy; GO:0035987,endodermal cell differentiation; GO:0045184,establishment of protein localization; GO:0090558,plant epidermis development;…	K13420: FLS2; LRR receptor-like serine/threonine-protein kinase FLS2 [EC:2.7.11.1]	At5g56040	ref|XP_014758035.1|	GSO1_ARATH, RecName: Full=LRR receptor-like serine/threonine-protein kinase GSO1 {ECO:0000303|PubMed:18088309}; EC=2.7.11.1 {ECO:0000255|PROSITE-ProRule:PRU00159}; AltName: Full=Protein GASSHO 1 {ECO:0000303|PubMed:18088309}; AltName: Full=Protein SCHENGEN 3 {ECO:0000303|PubMed:25233277}; Flags: Precursor;	I1IU71_BRADI, SubName: Full=Uncharacterized protein {ECO:0000313|EMBL:KQJ92166.1, ECO:0000313|EnsemblPlants:BRADI4G42020.1};
TRINITY_DN198392_c2_g6	390.623	190.463	1.04	0.000493	0.0291	up	--	--	--	--	--	--
TRINITY_DN192834_c2_g1	2.25449	30.2217	-3.73	0.000495	0.0292	down	GO:0016021,integral component of membrane; GO:0005886,plasma membrane; GO:0005524,ATP binding; GO:0004672,protein kinase activity	K04733: IRAK4; interleukin-1 receptor-associated kinase 4 [EC:2.7.11.1]	At5g24100	ref|XP_020197427.1|	Y5410_ARATH, RecName: Full=Inactive leucine-rich repeat receptor-like serine/threonine-protein kinase At5g24100; Flags: Precursor;	A0A287FC72_HORVV, SubName: Full=Predicted protein {ECO:0000313|EnsemblPlants:HORVU1Hr1G043880.7};
TRINITY_DN184262_c2_g8	47.3411	11.6928	2.05	0.0005	0.0295	up	--	--	--	--	--	--
TRINITY_DN185306_c1_g2	16.7095	53.0012	-1.67	0.000502	0.0295	down	--	--	--	--	--	--
TRINITY_DN157360_c0_g1	38.3544	3.25892	3.48	0.000507	0.0298	up	--	--	--	--	--	--
TRINITY_DN167888_c2_g2	61.3674	144.688	-1.23	0.000507	0.0298	down	--	--	--	--	--	--
TRINITY_DN177407_c0_g1	23.2773	5.17305	2.15	0.000511	0.03	up	GO:0005737,cytoplasm; GO:0070403,NAD+ binding; GO:0048040,UDP-glucuronate decarboxylase activity; GO:0033320,UDP-D-xylose biosynthetic process	K08678: UXS1, uxs; UDP-glucuronate decarboxylase [EC:4.1.1.35]	CE04302	gb|OUS49081.1|	UXS3_ARATH, RecName: Full=UDP-glucuronic acid decarboxylase 3; EC=4.1.1.35; AltName: Full=UDP-XYL synthase 3; AltName: Full=UDP-glucuronate decarboxylase 3; Short=UGD; Short=UXS-3;	B8C6B9_THAPS, SubName: Full=Dtdp-glucose 4,6-dehydratase {ECO:0000313|EMBL:EED90780.1}; EC=4.2.1.46 {ECO:0000313|EMBL:EED90780.1};
TRINITY_DN188643_c4_g1	0	24.5377	-7.06	0.000512	0.03	down	--	--	--	--	--	--
TRINITY_DN177230_c1_g5	68.7091	147.986	-1.11	0.000512	0.03	down	GO:0005634,nucleus; GO:0046872,metal ion binding; GO:0016740,transferase activity; GO:0006952,defense response; GO:0043161,proteasome-mediated ubiquitin-dependent protein catabolic process; GO:0043067,regulation of programmed cell death	K19042: BOI; E3 ubiquitin-protein ligase BOI and related proteins [EC:2.3.2.27]	At3g12920	gb|EMS54504.1|	BRG3_ARATH, RecName: Full=Probable BOI-related E3 ubiquitin-protein ligase 3; EC=2.3.2.27 {ECO:0000250|UniProtKB:Q9FHE4}; AltName: Full=RING-type E3 ubiquitin transferase BRG3 {ECO:0000305};	W5BCV0_WHEAT, SubName: Full=Uncharacterized protein {ECO:0000313|EnsemblPlants:TRIAE_CS42_2BL_TGACv1_130612_AA0414750.1};
TRINITY_DN185950_c0_g1	2.37599	24.2756	-3.35	0.000513	0.03	down	--	--	--	--	--	--
TRINITY_DN201842_c5_g3	31.7622	0.984948	4.84	0.000514	0.03	up	--	--	--	--	--	--
TRINITY_DN179839_c1_g1	60.4751	15.4426	1.95	0.000514	0.03	up	GO:0005840,ribosome; GO:0003735,structural constituent of ribosome; GO:0006412,translation	K02873: RP-L13e, RPL13; large subunit ribosomal protein L13e	CE08526	gb|EPS71909.1|	RL131_BRANA, RecName: Full=60S ribosomal protein L13-1; AltName: Full=Cold-induced protein C24A;	A0A1D1XXB9_9ARAE, RecName: Full=60S ribosomal protein L13 {ECO:0000256|RuleBase:RU000572}; Flags: Fragment;
TRINITY_DN188031_c0_g3	12.7447	54.6109	-2.1	0.000514	0.03	down	--	--	--	--	--	--
TRINITY_DN176997_c1_g2	35.5035	3.31606	3.46	0.000516	0.0301	up	--	--	--	--	--	--
TRINITY_DN175661_c5_g4	72.3192	20.7501	1.8	0.000517	0.0301	up	GO:0022625,cytosolic large ribosomal subunit; GO:0003723,RNA binding; GO:0003735,structural constituent of ribosome; GO:0000027,ribosomal large subunit assembly; GO:0006412,translation	K02866: RP-L10e, RPL10; large subunit ribosomal protein L10e	YLR075w	gb|POE93376.1|	RL101_ORYSJ, RecName: Full=60S ribosomal protein L10-1; AltName: Full=Protein QM; AltName: Full=Putative tumor suppressor SC34;	A0A1D1ZHV3_9ARAE, SubName: Full=60S ribosomal protein L10-A {ECO:0000313|EMBL:JAT66391.1};
TRINITY_DN200979_c0_g1	196.42	0	10.11	0.000517	0.0301	up	--	--	--	--	--	--
TRINITY_DN180306_c1_g1	755.344	210.442	1.84	0.00052	0.0302	up	GO:0005737,cytoplasm; GO:0004124,cysteine synthase activity; GO:0016740,transferase activity; GO:0006535,cysteine biosynthetic process from serine	K01738: cysK; cysteine synthase [EC:2.5.1.47]	At3g22460	ref|XP_006664222.1|	CYSK_MAIZE, RecName: Full=Cysteine synthase; Short=CSase; EC=2.5.1.47; AltName: Full=O-acetylserine (thiol)-lyase; Short=OAS-TL; AltName: Full=O-acetylserine sulfhydrylase;	A0A0E0MPT2_ORYPU, RecName: Full=Cysteine synthase {ECO:0000256|RuleBase:RU003985}; EC=2.5.1.47 {ECO:0000256|RuleBase:RU003985};
TRINITY_DN175893_c0_g1	42.8099	11.4831	1.88	0.000521	0.0303	up	--	--	--	dbj|GAQ81780.1|	--	A0A1Y1HT34_KLENI, SubName: Full=Uncharacterized protein {ECO:0000313|EMBL:GAQ81780.1};
TRINITY_DN174648_c0_g1	33.6821	1.81942	4.3	0.000522	0.0303	up	--	--	--	--	--	--
TRINITY_DN162112_c0_g1	65.4885	138.701	-1.08	0.000522	0.0303	down	--	--	--	--	--	--
TRINITY_DN157890_c0_g1	36.082	2.80384	3.63	0.000525	0.0304	up	--	--	--	--	--	--
TRINITY_DN193010_c3_g1	15.5727	0	6.46	0.000528	0.0306	up	--	--	--	--	--	--
TRINITY_DN199632_c2_g1	13.9923	50.8041	-1.86	0.000531	0.0307	down	GO:0009507,chloroplast; GO:0009535,chloroplast thylakoid membrane; GO:0016021,integral component of membrane; GO:0009579,thylakoid; GO:0009658,chloroplast organization; GO:0051205,protein insertion into membrane; GO:0072598,protein localization to chloroplast	K03217: yidC, spoIIIJ, OXA1, ccfA; YidC/Oxa1 family membrane protein insertase	At1g24490_2	ref|XP_003559153.1|	ALB4_ARATH, RecName: Full=ALBINO3-like protein 1, chloroplastic {ECO:0000305}; AltName: Full=Arabidopsis thaliana envelope membrane integrase {ECO:0000305}; AltName: Full=Protein ALBINA 4 {ECO:0000305}; Short=Ath4 {ECO:0000305}; AltName: Full=Protein ARTEMIS {ECO:0000303|PubMed:12169665}; AltName: Full=Suppressor of tic40 protein 1 {ECO:0000303|PubMed:28684427}; Flags: Precursor;	I1GKY1_BRADI, SubName: Full=Uncharacterized protein {ECO:0000313|EMBL:KQK12155.1, ECO:0000313|EnsemblPlants:BRADI1G01900.1};
TRINITY_DN197186_c2_g1	0	24.2154	-7.04	0.000534	0.0309	down	--	--	--	--	--	--
TRINITY_DN187479_c1_g1	150.008	52.1654	1.51	0.000539	0.0311	up	--	--	--	--	--	--
TRINITY_DN187071_c1_g3	3.37942	31.4034	-3.23	0.000539	0.0311	down	--	--	--	--	--	--
TRINITY_DN199608_c2_g3	54.9942	0	8.28	0.000544	0.0314	up	--	--	--	--	--	--
TRINITY_DN199813_c2_g4	12.3511	55.5176	-2.18	0.000545	0.0314	down	GO:0010330,cellulose synthase complex; GO:0009507,chloroplast; GO:0005794,Golgi apparatus; GO:0016021,integral component of membrane; GO:0005886,plasma membrane; GO:0016760,cellulose synthase (UDP-forming) activity; GO:0016759,cellulose synthase activity; GO:0046872,metal ion binding; GO:0030244,cellulose biosynthetic process; GO:0009833,plant-type primary cell wall biogenesis; GO:0009834,plant-t…	K10999: CESA; cellulose synthase A [EC:2.4.1.12]	At5g17420	gb|ONM21872.1|	CESA9_ORYSJ, RecName: Full=Cellulose synthase A catalytic subunit 9 [UDP-forming]; EC=2.4.1.12; AltName: Full=OsCesA9;	A0A287RJA5_HORVV, SubName: Full=Uncharacterized protein {ECO:0000313|EnsemblPlants:HORVU5Hr1G064230.18};
TRINITY_DN184502_c4_g5	118.718	5.24751	4.46	0.000549	0.0316	up	--	--	--	--	--	--
TRINITY_DN188179_c0_g2	28.3476	4.52958	2.71	0.000551	0.0317	up	GO:0005783,endoplasmic reticulum; GO:0005789,endoplasmic reticulum membrane; GO:0016021,integral component of membrane; GO:0005506,iron ion binding; GO:0016491,oxidoreductase activity; GO:0006633,fatty acid biosynthetic process; GO:0006631,fatty acid metabolic process	K19706: FAH; dihydroceramide fatty acyl 2-hydroxylase [EC:1.14.18.7]	SPAC19G12.08	gb|POF23967.1|	FAH2_ARATH, RecName: Full=Dihydroceramide fatty acyl 2-hydroxylase FAH2 {ECO:0000305}; EC=1.14.18.7 {ECO:0000269|PubMed:22635113}; AltName: Full=Fatty acid 2-hydroxylase 2 {ECO:0000303|PubMed:19054355}; Short=AtFAH2 {ECO:0000303|PubMed:19054355};	L1JSB6_GUITH, RecName: Full=Fatty acid 2-hydroxylase {ECO:0000256|PIRNR:PIRNR005149}; EC=1.-.-.- {ECO:0000256|PIRNR:PIRNR005149};
TRINITY_DN193859_c0_g3	55.6177	9.64602	2.52	0.000552	0.0317	up	--	--	--	--	--	--
TRINITY_DN188532_c4_g1	32.8961	1.89492	4.12	0.000554	0.0318	up	GO:0016021,integral component of membrane; GO:0005743,mitochondrial inner membrane; GO:0022857,transmembrane transporter activity	K05863: SLC25A4S, ANT; solute carrier family 25 (mitochondrial adenine nucleotide translocator), member 4/5/6/31	Hs20554413	ref|XP_003055578.1|	ADT_PARKE, RecName: Full=ADP,ATP carrier protein; AltName: Full=ADP/ATP translocase; AltName: Full=Adenine nucleotide translocator; Short=ANT;	G5AFG9_PHYSP, SubName: Full=Uncharacterized protein {ECO:0000313|EMBL:EGZ05959.1};
TRINITY_DN182681_c5_g1	0	19.5935	-6.73	0.00056	0.0321	down	--	--	--	--	--	--
TRINITY_DN165253_c0_g1	0.961786	41.2605	-5.39	0.000565	0.0324	down	GO:0000790,nuclear chromatin; GO:0000786,nucleosome; GO:0003677,DNA binding; GO:0046982,protein heterodimerization activity; GO:0006342,chromatin silencing	K11251: H2A; histone H2A	7301509	ref|XP_021987444.1|	H2AV1_ORYSJ, RecName: Full=Probable histone H2A variant 1;	A0A251TGS2_HELAN, RecName: Full=Histone H2A {ECO:0000256|RuleBase:RU003767};
TRINITY_DN168628_c1_g4	20.0901	1.81942	3.59	0.000566	0.0324	up	--	--	--	gb|POE94541.1|	--	--
TRINITY_DN202023_c4_g1	59.4287	19.953	1.56	0.000568	0.0325	up	GO:0005886,plasma membrane; GO:0043531,ADP binding; GO:0005524,ATP binding; GO:0009626,plant-type hypersensitive response; GO:0007165,signal transduction	K19613: SHOC2, SUR8; leucine-rich repeat protein SHOC2	At3g14470	ref|XP_022681868.1|	R13L1_ARATH, RecName: Full=Putative disease resistance RPP13-like protein 1;	A0A0E0HNU7_ORYNI, SubName: Full=Uncharacterized protein {ECO:0000313|EnsemblPlants:ONIVA06G11970.1};
TRINITY_DN195401_c3_g1	0	186.446	-9.98	0.000569	0.0325	down	--	--	--	--	--	--
TRINITY_DN180725_c0_g2	18.1516	2.70965	2.71	0.000573	0.0327	up	--	--	--	--	--	--
TRINITY_DN184574_c0_g1	25.9995	3.99867	2.69	0.000574	0.0327	up	GO:0005737,cytoplasm; GO:0005525,GTP binding; GO:0003924,GTPase activity; GO:0003746,translation elongation factor activity	K03234: EEF2; elongation factor 2	SPAC513.01c	dbj|BAJ87061.1|	EF2_BETVU, RecName: Full=Elongation factor 2; Short=EF-2;	F2CW40_HORVV, SubName: Full=Predicted protein {ECO:0000313|EMBL:BAJ87061.1};
TRINITY_DN183905_c0_g3	27.1138	91.4398	-1.74	0.000576	0.0328	down	--	--	--	--	--	--
TRINITY_DN191735_c2_g5	0	32.615	-7.46	0.000578	0.0329	down	--	--	--	--	--	--
TRINITY_DN176972_c1_g3	57.3227	14.0042	2.05	0.000578	0.0329	up	GO:0005618,cell wall; GO:0005829,cytosol; GO:0022626,cytosolic ribosome; GO:0022627,cytosolic small ribosomal subunit; GO:0016020,membrane; GO:0005730,nucleolus; GO:0005886,plasma membrane; GO:0009506,plasmodesma; GO:0005840,ribosome; GO:0015935,small ribosomal subunit; GO:0005774,vacuolar membrane; GO:0005773,vacuole; GO:0003729,mRNA binding; GO:0019843,rRNA binding; GO:0003735,structural consti…	K02964: RP-S18e, RPS18; small subunit ribosomal protein S18e	SPCC1259.01c	gb|POF03467.1|	RS18_ARATH, RecName: Full=40S ribosomal protein S18;	A0A1D1ZDE1_9ARAE, SubName: Full=40S ribosomal protein S18 {ECO:0000313|EMBL:JAT64843.1};
TRINITY_DN199454_c1_g4	125.006	29.6333	2.06	0.000579	0.0329	up	--	--	--	--	--	--
TRINITY_DN194870_c1_g1	233.898	72.0751	1.7	0.00058	0.0329	up	--	--	--	--	--	--
TRINITY_DN172281_c0_g2	19.5369	0.246237	5.83	0.000582	0.033	up	GO:0005576,extracellular region; GO:0016787,hydrolase activity	K01061: E3.1.1.45; carboxymethylenebutenolidase [EC:3.1.1.45]	YAL049c	gb|POE75776.1|	E134_MAIZE, RecName: Full=Endo-1,3;1,4-beta-D-glucanase; EC=3.2.1.-; Flags: Precursor;	A0A2I0WB41_9ASPA, SubName: Full=Endo-1,3(4)-beta-D-glucanase {ECO:0000313|EMBL:PKU72876.1};
TRINITY_DN201438_c0_g1	8.01333	57.1995	-2.84	0.000586	0.0332	down	GO:0005886,plasma membrane; GO:0043531,ADP binding; GO:0005524,ATP binding; GO:0009626,plant-type hypersensitive response; GO:0007165,signal transduction	K15078: SLX1; structure-specific endonuclease subunit SLX1 [EC:3.6.1.-]	At3g14470	gb|AAF19148.1|	R13L1_ARATH, RecName: Full=Putative disease resistance RPP13-like protein 1;	A0A1D6RMI2_WHEAT, SubName: Full=Uncharacterized protein {ECO:0000313|EnsemblPlants:TRIAE_CS42_2BS_TGACv1_146430_AA0464910.4};
TRINITY_DN194279_c0_g4	31.6345	2.44523	3.74	0.000587	0.0332	up	--	--	--	--	--	--
TRINITY_DN153291_c0_g1	54.0837	0.81473	5.96	0.00059	0.0333	up	--	--	--	gb|POE86650.1|	--	--
TRINITY_DN194501_c0_g1	36.657	95.9639	-1.4	0.000592	0.0334	down	GO:0005618,cell wall; GO:0005794,Golgi apparatus; GO:0016021,integral component of membrane; GO:0005886,plasma membrane; GO:0016760,cellulose synthase (UDP-forming) activity; GO:0016759,cellulose synthase activity; GO:0046872,metal ion binding; GO:0071555,cell wall organization; GO:0030244,cellulose biosynthetic process; GO:0042742,defense response to bacterium; GO:0050832,defense response to fun…	K10999: CESA; cellulose synthase A [EC:2.4.1.12]	At4g18780	ref|XP_003569818.1|	CESA4_ORYSJ, RecName: Full=Cellulose synthase A catalytic subunit 4 [UDP-forming]; EC=2.4.1.12; AltName: Full=OsCesA4;	A0A0Q3MZV5_BRADI, SubName: Full=Uncharacterized protein {ECO:0000313|EMBL:KQK09742.1};
TRINITY_DN180837_c1_g1	123.739	40.9535	1.59	0.000594	0.0335	up	--	--	--	--	--	--
TRINITY_DN175260_c3_g3	183.655	0	10.02	0.000595	0.0335	up	--	--	--	--	--	--
TRINITY_DN184777_c0_g1	239.966	35.3056	2.76	0.000597	0.0336	up	GO:0009897,external side of plasma membrane; GO:0016021,integral component of membrane; GO:0005886,plasma membrane; GO:0005524,ATP binding; GO:0042626,ATPase activity, coupled to transmembrane movement of substances; GO:0015245,fatty acid transmembrane transporter activity; GO:0042803,protein homodimerization activity; GO:0010588,cotyledon vascular tissue pattern formation; GO:0080051,cutin trans…	K05681: ABCG2, CD338; ATP-binding cassette, subfamily G (WHITE), member 2	At1g51500	ref|XP_020148009.1|	AB11G_ARATH, RecName: Full=ABC transporter G family member 11; Short=ABC transporter ABCG.11; Short=AtABCG11; AltName: Full=Protein CUTICULAR DEFECT AND ORGAN FUSION 1; AltName: Full=Protein DESPERADO; AltName: Full=Protein PERMEABLE LEAVES 1; AltName: Full=White-brown complex homolog protein 11; Short=AtWBC11;	A0A1D5YPN7_WHEAT, SubName: Full=Uncharacterized protein {ECO:0000313|EnsemblPlants:TRIAE_CS42_5AL_TGACv1_377408_AA1246590.1};
TRINITY_DN194187_c1_g6	660.465	323.458	1.03	0.00061	0.0343	up	--	--	--	--	--	--
TRINITY_DN172453_c1_g1	102.023	30.224	1.74	0.00061	0.0343	up	--	K07034: K07034; uncharacterized protein	YCR010c	gb|POE65725.1|	--	A0A176VV29_MARPO, SubName: Full=Uncharacterized protein {ECO:0000313|EMBL:OAE24668.1};
TRINITY_DN198078_c3_g2	1.28238	71.4966	-5.78	0.000611	0.0343	down	--	--	--	--	--	--
TRINITY_DN173228_c5_g3	34.4644	2.31241	4	0.000619	0.0347	up	--	--	--	gb|POE72889.1|	--	--
TRINITY_DN200377_c2_g2	436.21	109.498	1.99	0.000624	0.0349	up	GO:0016021,integral component of membrane; GO:0005886,plasma membrane; GO:0005524,ATP binding; GO:0005516,calmodulin binding; GO:0030246,carbohydrate binding; GO:0004674,protein serine/threonine kinase activity; GO:0006468,protein phosphorylation; GO:0048544,recognition of pollen	K04733: IRAK4; interleukin-1 receptor-associated kinase 4 [EC:2.7.11.1]	At4g21390	gb|PNT61920.1|	B120_ARATH, RecName: Full=G-type lectin S-receptor-like serine/threonine-protein kinase B120; EC=2.7.11.1; Flags: Precursor;	A0A287JKS9_HORVV, SubName: Full=Uncharacterized protein {ECO:0000313|EnsemblPlants:HORVU2Hr1G117360.1};
TRINITY_DN130392_c0_g1	158.423	53.9329	1.55	0.000625	0.035	up	--	--	--	--	--	--
TRINITY_DN174349_c2_g1	77.4293	7.27681	3.4	0.000626	0.035	up	GO:0005759,mitochondrial matrix; GO:0046872,metal ion binding; GO:0004784,superoxide dismutase activity	K04564: SOD2; superoxide dismutase, Fe-Mn family [EC:1.15.1.1]	At3g10920	gb|POE47225.1|	SODM_HEVBR, RecName: Full=Superoxide dismutase [Mn], mitochondrial; EC=1.15.1.1; Flags: Precursor;	A0A0D6R9T1_ARACU, RecName: Full=Superoxide dismutase {ECO:0000256|RuleBase:RU000414}; EC=1.15.1.1 {ECO:0000256|RuleBase:RU000414};
TRINITY_DN179844_c0_g3	30.6004	0.985467	4.99	0.000632	0.0353	up	GO:0022627,cytosolic small ribosomal subunit; GO:0003723,RNA binding; GO:0019843,rRNA binding; GO:0003735,structural constituent of ribosome; GO:0006412,translation	K02987: RP-S4e, RPS4; small subunit ribosomal protein S4e	7294504	ref|XP_005650091.1|	RS4_ORYSJ, RecName: Full=40S ribosomal protein S4; AltName: Full=SCAR protein SS620;	A0A1D1Y5R4_9ARAE, SubName: Full=40S ribosomal protein S4 {ECO:0000313|EMBL:JAT49979.1}; Flags: Fragment;
TRINITY_DN183991_c0_g3	1428.01	2881.34	-1.01	0.000634	0.0354	down	--	--	--	--	--	--
TRINITY_DN182152_c0_g1	0	24.2518	-7.04	0.000637	0.0355	down	--	--	--	--	--	--
TRINITY_DN166241_c0_g1	17.9556	0.246237	5.7	0.000641	0.0357	up	GO:0016021,integral component of membrane; GO:0005886,plasma membrane; GO:0009506,plasmodesma; GO:0005355,glucose transmembrane transporter activity; GO:0005358,high-affinity glucose:proton symporter activity; GO:0005351,carbohydrate:proton symporter activity; GO:0046323,glucose import; GO:0035428,NA; GO:0009737,response to abscisic acid; GO:0009651,response to salt stress; GO:0009414,response to…	K08145: SLC2A8, GLUT8; MFS transporter, SP family, solute carrier family 2 (facilitated glucose transporter), member 8	SPCC548.07c	gb|POF16337.1|	MST4_ORYSJ, RecName: Full=Sugar transport protein MST4 {ECO:0000305}; AltName: Full=Monosaccharide transporter 4 {ECO:0000303|PubMed:17874189}; Short=OsMST4 {ECO:0000303|PubMed:17874189}; AltName: Full=Sugar:proton symporter MST4 {ECO:0000305};	F2EHD2_HORVV, SubName: Full=Predicted protein {ECO:0000313|EMBL:BAK06754.1};
TRINITY_DN174300_c0_g4	0.362241	31.6097	-6.45	0.000644	0.0358	down	--	--	--	--	--	--
TRINITY_DN162053_c0_g1	190.643	0	10.07	0.000646	0.0359	up	--	K15687: MKRN; E3 ubiquitin-protein ligase makorin [EC:2.3.2.27]	At1g20390	gb|ABB46826.1|	--	Q33AU9_ORYSJ, SubName: Full=Retrotransposon protein, putative, Ty3-gypsy subclass {ECO:0000313|EMBL:ABB46826.1};
TRINITY_DN199191_c0_g3	51.6245	3.88403	3.72	0.000649	0.036	up	--	--	--	--	--	--
TRINITY_DN176991_c0_g3	2.59229	603.05	-7.86	0.000649	0.036	down	--	--	--	--	--	--
TRINITY_DN167483_c0_g1	1.64462	26.5293	-4	0.000652	0.0361	down	--	--	--	--	--	--
TRINITY_DN172541_c0_g1	25.1558	5.74207	2.15	0.000659	0.0365	up	GO:0005829,cytosol; GO:0005634,nucleus; GO:0051287,NAD binding; GO:0003979,UDP-glucose 6-dehydrogenase activity; GO:0006024,glycosaminoglycan biosynthetic process; GO:0006065,UDP-glucuronate biosynthetic process	K00012: UGDH, ugd; UDPglucose 6-dehydrogenase [EC:1.1.1.22]	Hs4507813	gb|OEL23381.1|	UGDH3_ORYSJ, RecName: Full=UDP-glucose 6-dehydrogenase 3; Short=UDP-Glc dehydrogenase 3; Short=UDP-GlcDH 3; Short=UDPGDH 3; EC=1.1.1.22; AltName: Full=Os-UGD3;	A0A0E0K0Q1_ORYPU, RecName: Full=UDP-glucose 6-dehydrogenase {ECO:0000256|PIRNR:PIRNR000124}; EC=1.1.1.22 {ECO:0000256|PIRNR:PIRNR000124};
TRINITY_DN198721_c0_g1	7.20437	39.2483	-2.45	0.00066	0.0365	down	--	--	--	--	--	--
TRINITY_DN185476_c1_g4	0	238.388	-10.33	0.00066	0.0365	down	--	--	--	--	--	--
TRINITY_DN191099_c0_g1	26.9773	5.04075	2.47	0.000662	0.0366	up	--	K00001: E1.1.1.1, adh; alcohol dehydrogenase [EC:1.1.1.1]	SPBC1198.01	gb|POE79969.1|	--	A0A0D6R0T0_ARACU, SubName: Full=Uncharacterized protein {ECO:0000313|EMBL:JAG95893.1};
TRINITY_DN171846_c0_g1	26.5053	1.95172	3.68	0.000663	0.0366	up	GO:0022625,cytosolic large ribosomal subunit; GO:0005634,nucleus; GO:0008097,5S rRNA binding; GO:0003735,structural constituent of ribosome; GO:0000027,ribosomal large subunit assembly; GO:0006412,translation	K02932: RP-L5e, RPL5; large subunit ribosomal protein L5e	CE02255	ref|XP_002981679.1|	RL52_ORYSJ, RecName: Full=60S ribosomal protein L5-2;	A0A1Q9CXV7_SYMMI, SubName: Full=60S ribosomal protein L5 {ECO:0000313|EMBL:OLP87758.1};
TRINITY_DN196770_c1_g1	78.7555	20.6197	1.93	0.000663	0.0366	up	GO:0009507,chloroplast; GO:0005829,cytosol; GO:0022626,cytosolic ribosome; GO:0022627,cytosolic small ribosomal subunit; GO:0016020,membrane; GO:0005634,nucleus; GO:0009506,plasmodesma; GO:0005774,vacuolar membrane; GO:0005773,vacuole; GO:0003684,damaged DNA binding; GO:0003729,mRNA binding; GO:0008534,oxidized purine nucleobase lesion DNA N-glycosylase activity; GO:0003735,structural constituent…	K02985: RP-S3e, RPS3; small subunit ribosomal protein S3e	--	gb|ACN31736.1|	RS31_ARATH, RecName: Full=40S ribosomal protein S3-1;	C0PC41_MAIZE, SubName: Full=Uncharacterized protein {ECO:0000313|EMBL:ACN31736.1};
TRINITY_DN200831_c1_g1	51.065	117.145	-1.2	0.000672	0.037	down	--	--	--	gb|KQK89478.1|	--	K4A8D6_SETIT, SubName: Full=Uncharacterized protein {ECO:0000313|EMBL:KQK89478.1, ECO:0000313|EnsemblPlants:Si035142m};
TRINITY_DN195200_c0_g5	0.324036	37.5149	-6.7	0.000673	0.037	down	--	--	--	--	--	--
TRINITY_DN173093_c0_g1	43.9214	2.55761	4.06	0.000675	0.0371	up	--	--	--	--	--	--
TRINITY_DN196062_c1_g1	50.712	8.18607	2.65	0.000676	0.0372	up	GO:0005887,integral component of plasma membrane; GO:0009705,plant-type vacuole membrane; GO:0005773,vacuole; GO:0005366,myo-inositol:proton symporter activity; GO:0015798,myo-inositol transport	K08150: SLC2A13, ITR; MFS transporter, SP family, solute carrier family 2 (myo-inositol transporter), member 13	CE19201	gb|POE72261.1|	INT1_ARATH, RecName: Full=Inositol transporter 1;	A0A0D6QZZ0_ARACU, SubName: Full=Uncharacterized protein {ECO:0000313|EMBL:JAG97147.1};
TRINITY_DN180576_c4_g1	99.8878	3.54359	4.83	0.000677	0.0372	up	--	--	--	--	--	--
TRINITY_DN185968_c1_g2	9.43561	158.484	-4.06	0.000687	0.0377	down	--	--	--	--	--	--
TRINITY_DN184901_c1_g2	50.1859	0.966768	5.7	0.000692	0.0379	up	--	--	--	--	--	--
TRINITY_DN201856_c3_g1	234.056	41.3937	2.5	0.000698	0.0382	up	--	K13457: RPM1, RPS3; disease resistance protein RPM1	--	gb|OEL26061.1|	--	A0A0E0AS90_9ORYZ, SubName: Full=Uncharacterized protein {ECO:0000313|EnsemblPlants:OGLUM08G06750.1};
TRINITY_DN182882_c0_g2	23.5528	4.2823	2.45	0.000703	0.0385	up	GO:0009331,glycerol-3-phosphate dehydrogenase complex; GO:0004367,glycerol-3-phosphate dehydrogenase [NAD+] activity; GO:0051287,NAD binding; GO:0042803,protein homodimerization activity; GO:0005975,carbohydrate metabolic process; GO:0046168,glycerol-3-phosphate catabolic process	K00006: GPD1; glycerol-3-phosphate dehydrogenase (NAD+) [EC:1.1.1.8]	SPBC215.05	ref|XP_020228350.1|	GPDA_CUPLA, RecName: Full=Glycerol-3-phosphate dehydrogenase [NAD(+)]; EC=1.1.1.8;	M4BG97_HYAAE, RecName: Full=Glycerol-3-phosphate dehydrogenase [NAD(+)] {ECO:0000256|RuleBase:RU361243}; EC=1.1.1.8 {ECO:0000256|RuleBase:RU361243};
TRINITY_DN193241_c1_g1	22.3794	2.80488	3.08	0.000708	0.0387	up	GO:1902911,protein kinase complex; GO:0005524,ATP binding; GO:0004674,protein serine/threonine kinase activity; GO:0009742,brassinosteroid mediated signaling pathway; GO:1900458,negative regulation of brassinosteroid mediated signaling pathway	K03083: GSK3B; glycogen synthase kinase 3 beta [EC:2.7.11.26]	SPAC1687.15	gb|POE56813.1|	GSK1_ORYSJ, RecName: Full=Shaggy-related protein kinase GSK1 {ECO:0000305}; EC=2.7.11.1 {ECO:0000305}; AltName: Full=Glycogen synthase kinase3-like protein 1 {ECO:0000305|PubMed:17690841}; Short=OsGSK1 {ECO:0000303|PubMed:17690841};	A0A1D1YSM9_9ARAE, SubName: Full=Glycogen synthase kinase-3 beta {ECO:0000313|EMBL:JAT57673.1};
TRINITY_DN187064_c1_g3	3.5644	162.221	-5.5	0.000709	0.0387	down	--	--	--	--	--	--
TRINITY_DN182275_c0_g1	139.857	2.70861	5.63	0.000711	0.0388	up	--	--	--	--	--	--
TRINITY_DN189269_c1_g2	71.1658	183.764	-1.37	0.000712	0.0388	down	--	--	--	--	--	--
TRINITY_DN180463_c3_g4	189.525	19.3502	3.31	0.000716	0.039	up	GO:0016021,integral component of membrane; GO:0005743,mitochondrial inner membrane; GO:0022857,transmembrane transporter activity	K05863: SLC25A4S, ANT; solute carrier family 25 (mitochondrial adenine nucleotide translocator), member 4/5/6/31	YBL030c	dbj|BAK06446.1|	ADT_CHLRE, RecName: Full=ADP,ATP carrier protein; AltName: Full=ADP/ATP translocase; AltName: Full=Adenine nucleotide translocator; Short=ANT;	F2EGH4_HORVV, SubName: Full=Predicted protein {ECO:0000313|EMBL:BAK06446.1};
TRINITY_DN163080_c0_g2	0	248.332	-10.39	0.000719	0.0391	down	--	--	--	--	--	--
TRINITY_DN173360_c0_g1	20.5773	3.78983	2.45	0.00072	0.0391	up	--	--	SPCC338.10c	gb|POF11528.1|	--	A0A1D1XH91_9ARAE, SubName: Full=Cytochrome c oxidase polypeptide 5, mitochondrial {ECO:0000313|EMBL:JAT41742.1}; Flags: Fragment;
TRINITY_DN185825_c1_g3	104.871	665.124	-2.67	0.000722	0.0392	down	GO:0005634,nucleus; GO:0003723,RNA binding	K13195: CIRBP; cold-inducible RNA-binding protein	At2g21660	ref|XP_020173018.1|	GRP1_SINAL, RecName: Full=Glycine-rich RNA-binding protein GRP1A;	M8CUT4_AEGTA, SubName: Full=Glycine-rich RNA-binding protein GRP1A {ECO:0000313|EMBL:EMT31367.1, ECO:0000313|EnsemblPlants:EMT31367};
TRINITY_DN190945_c0_g1	1.69659	47.5644	-4.81	0.000723	0.0392	down	GO:0009507,chloroplast; GO:0045549,9-cis-epoxycarotenoid dioxygenase activity; GO:0046872,metal ion binding; GO:0009688,abscisic acid biosynthetic process	K09840: NCED; 9-cis-epoxycarotenoid dioxygenase [EC:1.13.11.51]	At1g78390	ref|XP_020184738.1|	NCED4_ORYSJ, RecName: Full=9-cis-epoxycarotenoid dioxygenase NCED4, chloroplastic {ECO:0000305}; Short=OsNCED4 {ECO:0000312|EMBL:AAW21320.1}; EC=1.13.11.51 {ECO:0000250|UniProtKB:O24592}; Flags: Precursor;	A0A1D6DE12_WHEAT, SubName: Full=Uncharacterized protein {ECO:0000313|EnsemblPlants:TRIAE_CS42_U_TGACv1_641949_AA2108080.1};
TRINITY_DN184625_c4_g4	0	18.1956	-6.62	0.000723	0.0392	down	--	--	--	--	--	--
TRINITY_DN148439_c0_g1	23.643	2.76645	3.01	0.000724	0.0392	up	--	--	--	--	--	--
TRINITY_DN187305_c0_g13	33.2965	0.492474	5.86	0.000726	0.0393	up	--	--	--	--	--	--
TRINITY_DN174858_c2_g3	52.0465	9.24878	2.51	0.000728	0.0394	up	--	--	YDL181w	gb|POE93606.1|	--	A0A0D6QRT4_ARACU, SubName: Full=Uncharacterized protein {ECO:0000313|EMBL:JAG92951.1};
TRINITY_DN190905_c0_g5	1668.02	0	13.2	0.000728	0.0394	up	--	--	--	--	--	--
TRINITY_DN191364_c2_g4	164.197	35.9624	2.18	0.000739	0.0399	up	--	--	--	--	--	--
TRINITY_DN185306_c1_g1	21.7993	62.8253	-1.52	0.000743	0.04	down	--	--	--	--	--	--
TRINITY_DN179097_c1_g2	56.3681	7.18105	2.93	0.000743	0.04	up	--	--	--	--	--	--
TRINITY_DN178440_c1_g8	1544.38	524.4	1.56	0.000744	0.04	up	--	--	--	gb|POE72129.1|	--	A0A1D1Y0L1_9ARAE, SubName: Full=Uncharacterized protein {ECO:0000313|EMBL:JAT48180.1};
TRINITY_DN184501_c4_g2	23.6384	81.9225	-1.8	0.00075	0.0403	down	--	--	--	--	--	--
TRINITY_DN187700_c1_g1	110.013	34.145	1.68	0.000754	0.0404	up	--	--	--	--	--	--
TRINITY_DN173038_c0_g1	64.9541	6.61341	3.32	0.000754	0.0404	up	GO:0022626,cytosolic ribosome; GO:0022627,cytosolic small ribosomal subunit; GO:0009506,plasmodesma; GO:0042788,polysomal ribosome; GO:0005774,vacuolar membrane; GO:0003735,structural constituent of ribosome	K02975: RP-S25e, RPS25; small subunit ribosomal protein S25e	YGR027c	ref|XP_002953072.1|	RS252_ARATH, RecName: Full=40S ribosomal protein S25-2;	D8U310_VOLCA, SubName: Full=Component of cytosolic 80S ribosome and 40S small subunit {ECO:0000313|EMBL:EFJ45994.1};
TRINITY_DN177630_c4_g1	34.9402	4.24439	2.99	0.00076	0.0407	up	--	--	--	--	--	A0A1D1ZCR2_9ARAE, SubName: Full=Uncharacterized protein {ECO:0000313|EMBL:JAT64702.1};
TRINITY_DN201754_c2_g1	0.64119	39.8081	-5.92	0.000766	0.041	down	--	--	--	--	--	--
TRINITY_DN192236_c1_g4	26.8951	88.4093	-1.72	0.000773	0.0413	down	--	--	--	--	--	--
TRINITY_DN189961_c0_g3	0.320595	19.3705	-5.74	0.000776	0.0414	down	--	--	--	--	--	--
TRINITY_DN201000_c2_g3	5.0378	24.4859	-2.28	0.00078	0.0416	down	--	--	--	--	--	--
TRINITY_DN176453_c0_g6	0	22.4979	-6.92	0.00078	0.0416	down	--	K13457: RPM1, RPS3; disease resistance protein RPM1	--	gb|ACG63533.1|	--	A0A1D5T330_WHEAT, SubName: Full=Uncharacterized protein {ECO:0000313|EnsemblPlants:TRIAE_CS42_1DS_TGACv1_080727_AA0252810.1};
TRINITY_DN186012_c0_g2	23.4451	4.09287	2.47	0.000782	0.0417	up	--	--	--	gb|POF02545.1|	--	--
TRINITY_DN184721_c1_g9	60.9716	14.8575	2.05	0.000788	0.0419	up	GO:0016607,nuclear speck; GO:0005634,nucleus; GO:0005774,vacuolar membrane; GO:0008143,poly(A) binding; GO:0043621,protein self-association	K14396: PABPN1, PABP2; polyadenylate-binding protein 2	At5g10350	ref|XP_004953974.1|	PABN3_ARATH, RecName: Full=Polyadenylate-binding protein 3 {ECO:0000303|PubMed:18479511}; Short=AtPabN2 {ECO:0000303|PubMed:23334891}; Short=AtPabN3 {ECO:0000303|PubMed:18479511}; Short=Poly(A)-binding protein 3 {ECO:0000303|PubMed:18479511}; AltName: Full=Nuclear poly(A)-binding protein 3 {ECO:0000305}; AltName: Full=Poly(A)-binding protein III {ECO:0000305}; Short=PABIII {ECO:0000305};	K3YVP7_SETIT, SubName: Full=Uncharacterized protein {ECO:0000313|EMBL:KQL31585.1, ECO:0000313|EnsemblPlants:Si018343m};
TRINITY_DN178661_c0_g1	60.6546	0.644512	6.56	0.000788	0.0419	up	--	--	--	--	--	--
TRINITY_DN179604_c2_g4	196.648	71.424	1.46	0.000789	0.0419	up	--	--	--	--	--	--
TRINITY_DN177753_c0_g1	0	186.856	-9.98	0.000792	0.0421	down	--	--	--	gb|OIT06636.1|	--	A0A1J6IQV1_NICAT, SubName: Full=Uncharacterized protein {ECO:0000313|EMBL:OIT06636.1};
TRINITY_DN200253_c0_g6	50.2459	219.735	-2.13	0.000793	0.0421	down	--	--	--	--	--	--
TRINITY_DN171741_c1_g2	33.4605	4.49114	2.87	0.000796	0.0422	up	GO:0022627,cytosolic small ribosomal subunit; GO:0003735,structural constituent of ribosome; GO:0000028,ribosomal small subunit assembly; GO:0006412,translation	K02962: RP-S17e, RPS17; small subunit ribosomal protein S17e	At3g10610	emb|CDO99925.1|	RS17_SOLLC, RecName: Full=40S ribosomal protein S17;	A0A0V0HDM8_SOLCH, SubName: Full=Putative 40S ribosomal protein S17-like {ECO:0000313|EMBL:JAP18545.1};
TRINITY_DN193857_c0_g1	582.665	268.783	1.12	0.000803	0.0425	up	--	--	--	--	--	--
TRINITY_DN179716_c0_g2	22.231	3.39208	2.77	0.000809	0.0427	up	GO:0009507,chloroplast; GO:0009570,chloroplast stroma; GO:0005829,cytosol; GO:0005739,mitochondrion; GO:0009506,plasmodesma; GO:0009536,plastid; GO:0008114,phosphogluconate 2-dehydrogenase activity; GO:0004616,phosphogluconate dehydrogenase (decarboxylating) activity; GO:0019521,D-gluconate metabolic process; GO:0009051,pentose-phosphate shunt, oxidative branch; GO:0046686,response to cadmium ion…	K00033: PGD, gnd, gntZ; 6-phosphogluconate dehydrogenase [EC:1.1.1.44 1.1.1.343]	SPBC660.16	gb|POE93491.1|	6PGD2_ARATH, RecName: Full=6-phosphogluconate dehydrogenase, decarboxylating 2, chloroplastic; EC=1.1.1.44;	A0A0D6QX24_ARACU, RecName: Full=6-phosphogluconate dehydrogenase, decarboxylating {ECO:0000256|RuleBase:RU000485}; EC=1.1.1.44 {ECO:0000256|RuleBase:RU000485};
TRINITY_DN188651_c0_g6	14751.3	33768	-1.19	0.00081	0.0428	down	--	--	--	--	--	--
TRINITY_DN171389_c0_g1	25.7943	4.34014	2.6	0.000815	0.043	up	GO:0009507,chloroplast; GO:0009570,chloroplast stroma; GO:0046872,metal ion binding; GO:0033743,peptide-methionine (R)-S-oxide reductase activity; GO:0030091,protein repair; GO:0006979,response to oxidative stress	K07305: msrB; peptide-methionine (R)-S-oxide reductase [EC:1.8.4.12]	At4g04800	gb|POF11246.1|	MSRB2_ARATH, RecName: Full=Peptide methionine sulfoxide reductase B2, chloroplastic; Short=AtMSRB2; EC=1.8.4.12; AltName: Full=Peptide-methionine (R)-S-oxide reductase; Flags: Precursor;	A0A1Y1IIX7_KLENI, SubName: Full=Methionine sulfoxide reductase B {ECO:0000313|EMBL:GAQ90062.1};
TRINITY_DN178454_c3_g8	23.6812	6.72753	1.83	0.000819	0.0431	up	--	--	--	gb|POF26420.1|	--	--
TRINITY_DN165246_c0_g2	42.3163	3.65719	3.48	0.000825	0.0434	up	--	--	--	--	--	--
TRINITY_DN100907_c0_g1	21.9161	107.501	-2.3	0.000831	0.0436	down	--	--	--	--	--	--
TRINITY_DN185672_c2_g3	39.8077	3.22082	3.6	0.000834	0.0438	up	GO:0005840,ribosome; GO:0003735,structural constituent of ribosome; GO:0006412,translation	K02957: RP-S15Ae, RPS15A; small subunit ribosomal protein S15Ae	YJL190c	ref|XP_011024999.1|	RS15A_DAUCA, RecName: Full=40S ribosomal protein S15a;	A0A1D1YJA7_9ARAE, SubName: Full=40S ribosomal protein S22 {ECO:0000313|EMBL:JAT54728.1};
TRINITY_DN199809_c0_g4	93.0831	41.9734	1.14	0.000836	0.0439	up	--	--	--	--	--	--
TRINITY_DN169488_c0_g1	22.4233	5.34431	2.12	0.000847	0.0443	up	GO:0005618,cell wall; GO:0005749,mitochondrial respiratory chain complex II, succinate dehydrogenase complex (ubiquinone); GO:0005739,mitochondrion; GO:0045273,respiratory chain complex II; GO:0005524,ATP binding; GO:0050897,cobalt ion binding; GO:0009055,electron transfer activity; GO:0050660,flavin adenine dinucleotide binding; GO:0008177,succinate dehydrogenase (ubiquinone) activity; GO:000010…	K00234: SDHA, SDH1; succinate dehydrogenase (ubiquinone) flavoprotein subunit [EC:1.3.5.1]	SPAC1556.02c	gb|POF12837.1|	SDHA1_ARATH, RecName: Full=Succinate dehydrogenase [ubiquinone] flavoprotein subunit 1, mitochondrial; EC=1.3.5.1 {ECO:0000250|UniProtKB:P31040}; AltName: Full=Flavoprotein subunit 1 of complex II; Short=FP; Flags: Precursor;	D7MLY6_ARALL, RecName: Full=Succinate dehydrogenase [ubiquinone] flavoprotein subunit, mitochondrial {ECO:0000256|RuleBase:RU362051}; EC=1.3.5.1 {ECO:0000256|RuleBase:RU362051};
TRINITY_DN184587_c1_g1	0	182.722	-9.95	0.000854	0.0446	down	--	--	--	--	--	--
TRINITY_DN201455_c3_g1	909.022	379.835	1.26	0.000856	0.0447	up	GO:0016021,integral component of membrane; GO:0005886,plasma membrane; GO:0005524,ATP binding; GO:0004714,transmembrane receptor protein tyrosine kinase activity	K13420: FLS2; LRR receptor-like serine/threonine-protein kinase FLS2 [EC:2.7.11.1]	At2g41820	ref|XP_014758035.1|	PXC3_ARATH, RecName: Full=Leucine-rich repeat receptor-like tyrosine-protein kinase PXC3 {ECO:0000305}; EC=2.7.10.1; AltName: Full=Protein PXY/TDR-CORRELATED 3 {ECO:0000303|PubMed:23815750}; Flags: Precursor;	A0A1D5VN91_WHEAT, SubName: Full=Uncharacterized protein {ECO:0000313|EnsemblPlants:TRIAE_CS42_3B_TGACv1_220612_AA0711360.1};
TRINITY_DN178811_c2_g1	44.0173	6.42346	2.77	0.000862	0.045	up	GO:0005737,cytoplasm; GO:0004022,alcohol dehydrogenase (NAD) activity; GO:0051903,S-(hydroxymethyl)glutathione dehydrogenase activity; GO:0008270,zinc ion binding; GO:0006069,ethanol oxidation	K00121: frmA, ADH5, adhC; S-(hydroxymethyl)glutathione dehydrogenase / alcohol dehydrogenase [EC:1.1.1.284 1.1.1.1]	7299380	gb|POE75603.1|	ADHX_ORYSJ, RecName: Full=Alcohol dehydrogenase class-3; EC=1.1.1.1 {ECO:0000250|UniProtKB:Q96533}; AltName: Full=Alcohol dehydrogenase class-III; AltName: Full=Glutathione-dependent formaldehyde dehydrogenase; Short=FALDH; Short=FDH; Short=GSH-FDH; EC=1.1.1.-; AltName: Full=S-(hydroxymethyl)glutathione dehydrogenase; EC=1.1.1.284 {ECO:0000250|UniProtKB:Q96533};	A0A2H3ZFI3_PHODC, SubName: Full=alcohol dehydrogenase class-3-like {ECO:0000313|RefSeq:XP_008812993.1};
TRINITY_DN191000_c1_g1	64.0234	281.442	-2.14	0.000866	0.0452	down	--	--	--	--	--	--
TRINITY_DN197173_c0_g3	55.9924	14.2303	1.95	0.000877	0.0456	up	GO:0005634,nucleus; GO:0003677,DNA binding; GO:0006355,regulation of transcription, DNA-templated; GO:0006351,transcription, DNA-templated	K00521: E1.16.1.7; ferric-chelate reductase [EC:1.16.1.7]	At1g77450	ref|XP_003564478.1|	NAC68_ORYSJ, RecName: Full=NAC domain-containing protein 68 {ECO:0000303|PubMed:15029955}; Short=ONAC068 {ECO:0000303|PubMed:15029955}; AltName: Full=OsNAC4 {ECO:0000303|PubMed:10660065};	I1HSS7_BRADI, SubName: Full=Uncharacterized protein {ECO:0000313|EMBL:KQK10307.1, ECO:0000313|EnsemblPlants:BRADI2G53260.1};
TRINITY_DN193015_c1_g5	13.5605	50.2606	-1.88	0.000877	0.0456	down	--	--	--	--	--	--
TRINITY_DN183357_c0_g5	0.320595	30.724	-6.41	0.000883	0.0459	down	--	--	--	--	--	--
TRINITY_DN187874_c0_g2	36.3403	8.37517	2.1	0.000883	0.0459	up	--	--	--	gb|POF05841.1|	--	--
TRINITY_DN201791_c1_g2	2.98241	144.194	-5.59	0.000885	0.0459	down	--	--	--	--	--	--
TRINITY_DN186201_c0_g1	13.9713	169.711	-3.6	0.000887	0.0461	down	--	--	--	--	--	--
TRINITY_DN200758_c2_g1	112.411	0.246237	8.35	0.000888	0.0461	up	--	--	--	--	--	--
TRINITY_DN191125_c2_g3	37.126	0	7.71	0.000898	0.0465	up	GO:0000139,Golgi membrane; GO:0005886,plasma membrane; GO:0015031,protein transport	K02433: gatA, QRSL1; aspartyl-tRNA(Asn)/glutamyl-tRNA(Gln) amidotransferase subunit A [EC:6.3.5.6 6.3.5.7]	At4g39170	ref|XP_015640193.1|	SFH8_ARATH, RecName: Full=Phosphatidylinositol/phosphatidylcholine transfer protein SFH8; AltName: Full=Protein SEC FOURTEEN HOMOLOGS 8; Short=AtSFH8;	A0A0E0L593_ORYPU, SubName: Full=Uncharacterized protein {ECO:0000313|EnsemblPlants:OPUNC05G22080.1};
TRINITY_DN177792_c2_g1	235.508	0.738711	8.23	0.000905	0.0468	up	GO:0012505,endomembrane system; GO:0016021,integral component of membrane; GO:0005886,plasma membrane; GO:0005524,ATP binding; GO:0004674,protein serine/threonine kinase activity; GO:0019199,transmembrane receptor protein kinase activity; GO:0010204,defense response signaling pathway, resistance gene-independent; GO:0016045,detection of bacterium; GO:0002764,immune response-regulating signaling p…	K04730: IRAK1; interleukin-1 receptor-associated kinase 1 [EC:2.7.11.1]	At5g39390	ref|XP_003575561.2|	EFR_ARATH, RecName: Full=LRR receptor-like serine/threonine-protein kinase EFR; EC=2.7.11.1; AltName: Full=Elongation factor Tu receptor; Short=EF-Tu receptor; Flags: Precursor;	A0A1D6B769_WHEAT, SubName: Full=Uncharacterized protein {ECO:0000313|EnsemblPlants:TRIAE_CS42_6DL_TGACv1_527241_AA1701000.1};
TRINITY_DN192689_c2_g5	158.597	0	9.81	0.000914	0.0471	up	--	--	--	--	--	--
TRINITY_DN199553_c0_g1	26.0362	6.78433	1.93	0.000914	0.0471	up	--	--	--	gb|OEL35960.1|	--	A0A0A9THS8_ARUDO, SubName: Full=Uncharacterized protein {ECO:0000313|EMBL:JAF69112.1};
TRINITY_DN159346_c0_g1	195.51	0	10.11	0.000915	0.0471	up	--	--	--	ref|XP_021990308.1|	--	--
TRINITY_DN156768_c0_g1	88.6734	25.8649	1.76	0.000915	0.0471	up	GO:0005840,ribosome; GO:0003735,structural constituent of ribosome; GO:0006412,translation	K02910: RP-L31e, RPL31; large subunit ribosomal protein L31e	Hs4506633	ref|XP_002282984.1|	RL31_CYAPA, RecName: Full=60S ribosomal protein L31;	W4HBT9_9STRA, SubName: Full=60S ribosomal protein L31 {ECO:0000313|EMBL:ETV89407.1};
TRINITY_DN184142_c0_g3	19.5391	0.833949	4.81	0.000918	0.0473	up	--	--	YKL046c	gb|POF11471.1|	--	--
TRINITY_DN176427_c1_g3	2.89793	107.432	-5.23	0.000919	0.0473	down	--	--	--	--	--	--
TRINITY_DN184512_c4_g1	141.542	60.2399	1.22	0.000923	0.0475	up	GO:0005634,nucleus; GO:0003677,DNA binding; GO:0003700,DNA binding transcription factor activity; GO:0006351,transcription, DNA-templated	K06236: COL1A; collagen, type I, alpha	At3g24120	gb|PNT61782.1|	PHLC_ARATH, RecName: Full=Myb family transcription factor PHL12 {ECO:0000305}; AltName: Full=Protein PHR1-LIKE 12 {ECO:0000305};	I1J1D6_BRADI, SubName: Full=Uncharacterized protein {ECO:0000313|EMBL:KQJ84388.1, ECO:0000313|EnsemblPlants:BRADI5G20520.1};
TRINITY_DN186379_c3_g2	384.405	97.2998	1.98	0.000928	0.0477	up	--	--	At2g15220	ref|XP_020161391.1|	--	A0A1D5SVQ0_WHEAT, SubName: Full=Uncharacterized protein {ECO:0000313|EnsemblPlants:TRIAE_CS42_1DL_TGACv1_062367_AA0213360.1};
TRINITY_DN172684_c0_g1	21.0519	3.12662	2.76	0.00093	0.0477	up	--	--	SPAC1635.01	gb|POE82304.1|	--	A0A1D1YV09_9ARAE, SubName: Full=Mitochondrial outer membrane protein porin {ECO:0000313|EMBL:JAT58430.1};
TRINITY_DN176490_c4_g1	452.889	175.204	1.37	0.000932	0.0477	up	GO:0004364,glutathione transferase activity; GO:0009734,auxin-activated signaling pathway	K00799: GST, gst; glutathione S-transferase [EC:2.5.1.18]	At3g09270	dbj|BAJ97078.1|	GSTX1_TOBAC, RecName: Full=Probable glutathione S-transferase; EC=2.5.1.18; AltName: Full=Auxin-induced protein PGNT1/PCNT110;	M0X7U6_HORVV, SubName: Full=Uncharacterized protein {ECO:0000313|EnsemblPlants:HORVU3Hr1G106450.1};
TRINITY_DN166691_c0_g1	23.6296	1.45924	3.96	0.000933	0.0478	up	--	--	--	gb|POF04173.1|	--	--
TRINITY_DN195488_c2_g6	49.626	130.809	-1.4	0.000936	0.0479	down	--	--	--	--	--	--
TRINITY_DN184360_c2_g2	5.03092	50.2859	-3.32	0.000936	0.0479	down	--	--	--	--	--	--
TRINITY_DN162008_c0_g1	0	161.012	-9.77	0.000943	0.0481	down	--	--	--	--	--	--
TRINITY_DN181400_c0_g1	32.9655	0.984948	4.91	0.000944	0.0481	up	--	--	--	--	--	--
TRINITY_DN109723_c0_g1	0	33.8155	-7.51	0.000945	0.0482	down	GO:0005737,cytoplasm; GO:0005634,nucleus; GO:0019773,proteasome core complex, alpha-subunit complex; GO:0004298,threonine-type endopeptidase activity; GO:0006511,ubiquitin-dependent protein catabolic process	K02728: PSMA4; 20S proteasome subunit alpha 3 [EC:3.4.25.1]	Hs4506185	dbj|BAK00721.1|	PSA4B_ORYSJ, RecName: Full=Proteasome subunit alpha type-4-2; EC=3.4.25.1; AltName: Full=20S proteasome alpha subunit C; AltName: Full=20S proteasome subunit alpha-3;	F2E049_HORVV, RecName: Full=Proteasome subunit alpha type {ECO:0000256|RuleBase:RU000551}; EC=3.4.25.1 {ECO:0000256|RuleBase:RU000551};
TRINITY_DN155361_c1_g1	154.774	0	9.77	0.000946	0.0482	up	--	--	--	--	--	--
TRINITY_DN168802_c0_g1	0.64119	24.882	-5.24	0.000948	0.0482	down	--	--	--	--	--	--
TRINITY_DN199819_c0_g3	0	22.6316	-6.93	0.000958	0.0487	down	--	--	--	--	--	--
TRINITY_DN184150_c3_g2	20.2486	60.3359	-1.59	0.000959	0.0487	down	GO:0005618,cell wall; GO:0016021,integral component of membrane; GO:0005886,plasma membrane; GO:0016760,cellulose synthase (UDP-forming) activity; GO:0046872,metal ion binding; GO:0071555,cell wall organization; GO:0030244,cellulose biosynthetic process; GO:0042742,defense response to bacterium; GO:0050832,defense response to fungus; GO:0009834,plant-type secondary cell wall biogenesis; GO:000697…	K10999: CESA; cellulose synthase A [EC:2.4.1.12]	At4g18780	ref|XP_003569818.1|	CESA4_ORYSI, RecName: Full=Cellulose synthase A catalytic subunit 4 [UDP-forming]; EC=2.4.1.12; AltName: Full=OsCesA4;	A0A0Q3MZV5_BRADI, SubName: Full=Uncharacterized protein {ECO:0000313|EMBL:KQK09742.1};
TRINITY_DN199412_c4_g6	165.943	57.0054	1.54	0.000961	0.0488	up	--	--	--	--	--	--
TRINITY_DN190973_c0_g2	1366.03	307.415	2.15	0.000962	0.0488	up	GO:0005576,extracellular region; GO:0050832,defense response to fungus; GO:0031640,killing of cells of other organism	K04733: IRAK4; interleukin-1 receptor-associated kinase 4 [EC:2.7.11.1]	At4g11650	ref|XP_010237188.1|	TLP_ACTDE, RecName: Full=Thaumatin-like protein; AltName: Allergen=Act d 2; Flags: Precursor;	W5FNH7_WHEAT, SubName: Full=Uncharacterized protein {ECO:0000313|EnsemblPlants:TRIAE_CS42_5BS_TGACv1_424451_AA1389850.1};
TRINITY_DN199653_c0_g3	32.3727	10.48	1.63	0.000964	0.0489	up	--	--	--	--	--	--
TRINITY_DN175203_c0_g2	16.0764	1.30772	3.66	0.000976	0.0494	up	--	--	YGR289c	gb|POE85381.1|	--	A0A0D6QRE2_ARACU, SubName: Full=Uncharacterized protein {ECO:0000313|EMBL:JAG93612.1};
TRINITY_DN185142_c2_g3	58.6375	22.2851	1.4	0.000977	0.0494	up	--	--	--	--	--	--
TRINITY_DN195196_c0_g1	26.782	0.984948	4.59	0.00098	0.0495	up	GO:0005737,cytoplasm; GO:0005525,GTP binding; GO:0003924,GTPase activity; GO:0003746,translation elongation factor activity	K03231: EEF1A; elongation factor 1-alpha	7303554	ref|XP_003082562.2|	EF1A_BLAHO, RecName: Full=Elongation factor 1-alpha; Short=EF-1-alpha;	R7Q1G0_CHOCR, SubName: Full=Translation elongation factor eEF1, subunit alpha {ECO:0000313|EMBL:CDF32437.1};
TRINITY_DN177700_c0_g1	31.7859	9.09674	1.83	0.00098	0.0495	up	--	--	--	--	--	--
TRINITY_DN178636_c2_g1	54.6478	17.7002	1.61	0.000986	0.0498	up	--	--	YML052w	gb|POE89996.1|	--	--
TRINITY_DN176567_c2_g1	495.323	229.685	1.11	0.000988	0.0498	up	--	--	--	--	--	--
TRINITY_DN187252_c1_g2	52.1701	6.5381	2.99	0.000991	0.0499	up	--	--	--	--	--	--
TRINITY_DN153481_c0_g1	24.4725	0.492474	5.41	0.000991	0.0499	up	--	--	--	--	--	--
