# Supplementary material for: Multi-omics analysis reveals the molecular changes accompanying heavy-grazing-induced dwarfing of Stipa grandis
Source: Front Plant Sci. 2022 Oct 4;13:995074. doi: 10.3389/fpls.2022.995074 (PMC9673880; doi:10.3389/fpls.2022.995074)
Supplement: Supplementary file 3 [file Table_3.xlsx]

## Sheet: Table S3 
Supplementary Table S3. Overview of proteins identification and annotation
Protein	Description	Gene	HG_1	HG_2	HG_3	NG_1	NG_2	NG_3	HG.vs.NG FC	HG.vs.NG Pvalue	HG.vs.NG log2FC	HG.vs.NG Sig	HG.vs.NG UP.DOWN	GO_NUM	GO_Description	KEGG_Description	KEGG_EC	KEGG_ko	COG_Function_Description	COG_Function_Class	COG_Class_Description
TRINITY_DN190019_c1_g3	RBL_BRADI, RecName: Full=Ribulose bisphosphate carboxylase large chain {ECO:0000255|HAMAP-Rule:MF_01338} Short=RuBisCO large subunit {ECO:0000255|HAMAP-Rule:MF_01338} EC=4.1.1.39 {ECO:0000255|HAMAP-Rule:MF_01338} Flags: Precursor	-	130511	145278	135631	134053	143637	161678	0.93639	0.383795	-0.0948183	Nonsignificant	None	3	Molecular Function:magnesium ion binding (GO:0000287),Biological Process:carbon fixation (GO:0015977),Molecular Function:ribulose-bisphosphate carboxylase activity (GO:0016984)	ribulose-bisphosphate carboxylase large chain	4.1.1.39	ko00630 Glyoxylate and dicarboxylate metabolism ko00710 Carbon fixation in photosynthetic organisms ko01100 Metabolic pathways ko01200 Carbon metabolism	Ribulose 1,5-bisphosphate carboxylase, large subunit, or a RuBisCO-like protein	G	Carbohydrate transport and metabolism ;
TRINITY_DN201999_c7_g1	GLTB_ORYSJ, RecName: Full=Ferredoxin-dependent glutamate synthase, chloroplastic EC=1.4.7.1 AltName: Full=Fd-GOGAT Flags: Precursor	-	7458.7	8379.8	8085.8	8029.9	8363.5	8953.4	0.943879	0.283391	-0.0833269	Nonsignificant	None	6	Biological Process:glutamate biosynthetic process (GO:0006537),Biological Process:nitrogen compound metabolic process (GO:0006807),Biological Process:metabolic process (GO:0008152),Molecular Function:glutamate synthase activity (GO:0015930),Molecular Function:oxidoreductase activity (GO:0016491),Biological Process:oxidation-reduction process (GO:0055114)	glutamate synthase (ferredoxin)	1.4.7.1	ko00630 Glyoxylate and dicarboxylate metabolism ko00910 Nitrogen metabolism	Glutamate synthase domain 3	E	Amino acid transport and metabolism ;
TRINITY_DN201963_c2_g1	GLTB_ORYSJ, RecName: Full=Ferredoxin-dependent glutamate synthase, chloroplastic EC=1.4.7.1 AltName: Full=Fd-GOGAT Flags: Precursor	-	145.8	187.6	161.4	189.1	177.3	205.4	0.865338	0.165416	-0.208665	Nonsignificant	None	4	Biological Process:glutamate biosynthetic process (GO:0006537),Biological Process:nitrogen compound metabolic process (GO:0006807),Molecular Function:glutamate synthase activity (GO:0015930),Biological Process:oxidation-reduction process (GO:0055114)	glutamate synthase (ferredoxin)	1.4.7.1	ko00630 Glyoxylate and dicarboxylate metabolism ko00910 Nitrogen metabolism	Glutamate synthase domain 3	E	Amino acid transport and metabolism ;
TRINITY_DN200998_c0_g2	ATPB_HORVU, RecName: Full=ATP synthase subunit beta, chloroplastic {ECO:0000255|HAMAP-Rule:MF_01347} EC=3.6.3.14 {ECO:0000255|HAMAP-Rule:MF_01347} AltName: Full=ATP synthase F1 sector subunit beta {ECO:0000255|HAMAP-Rule:MF_01347} AltName: Full=F-ATPase subunit beta {ECO:0000255|HAMAP-Rule:MF_01347}	-	15491.1	17345.2	16535.9	16916.9	17845.3	17985.3	0.93601	0.163665	-0.0954038	Nonsignificant	None	3	Molecular Function:ATP binding (GO:0005524),Biological Process:proton transport (GO:0015992),Biological Process:ATP metabolic process (GO:0046034)	F-type H+-transporting ATPase subunit beta	3.6.3.14	ko00190 Oxidative phosphorylation ko00195 Photosynthesis ko01100 Metabolic pathways	FoF1-type ATP synthase, beta subunit	C	Energy production and conversion ;
TRINITY_DN201670_c5_g3	GCSP1_ARATH, RecName: Full=Glycine dehydrogenase (decarboxylating) 1, mitochondrial EC=1.4.4.2 AltName: Full=Glycine cleavage system P protein 1 AltName: Full=Glycine decarboxylase 1 AltName: Full=Glycine decarboxylase P-protein 1 Short=AtGLDP1 AltName: Full=Glycine dehydrogenase (aminomethyl-transferring) 1 Flags: Precursor	-	5709.8	6010.1	5649.2	5756.8	5901.6	5767.7	0.996729	0.88622	-0.00472673	Nonsignificant	None	3	Molecular Function:glycine dehydrogenase (decarboxylating) activity (GO:0004375),Biological Process:glycine catabolic process (GO:0006546),Biological Process:oxidation-reduction process (GO:0055114)	glycine dehydrogenase	1.4.4.2	ko00260 Glycine, serine and threonine metabolism ko00630 Glyoxylate and dicarboxylate metabolism ko01100 Metabolic pathways ko01110 Biosynthesis of secondary metabolites ko01200 Carbon metabolism	Glycine cleavage system protein P (pyridoxal-binding), C-terminal domain	E	Amino acid transport and metabolism ;
TRINITY_DN193238_c0_g2	CLPC1_ORYSJ, RecName: Full=Chaperone protein ClpC1, chloroplastic AltName: Full=ATP-dependent Clp protease ATP-binding subunit ClpC homolog 1 AltName: Full=Casein lytic proteinase C1 Flags: Precursor	-	5513.2	5677.2	5790.1	5925.1	5840.5	5698.9	0.972287	0.19844	-0.0405464	Nonsignificant	None	3	Molecular Function:protein binding (GO:0005515),Molecular Function:ATP binding (GO:0005524),Biological Process:protein metabolic process (GO:0019538)	ATP-dependent Clp protease ATP-binding subunit ClpC	--	ko01100 Metabolic pathways	ATP-dependent Clp protease ATP-binding subunit ClpA	O	Posttranslational modification, protein turnover, chaperones ;
TRINITY_DN199618_c0_g1	PREP1_ARATH, RecName: Full=Presequence protease 1, chloroplastic/mitochondrial Short=AtPreP1 Short=PreP 1 EC=3.4.24.- AltName: Full=Zinc metalloprotease 1 Short=AtZnMP1 Flags: Precursor	-	460	492.6	464.6	466.9	450.9	537.1	0.974088	0.692209	-0.0378766	Nonsignificant	None	1	Biological Process:proteolysis (GO:0006508)	presequence protease	3.4.24.-	--	Zn-dependent peptidase, M16 (insulinase) family	O	Posttranslational modification, protein turnover, chaperones ;
TRINITY_DN202013_c3_g1	GCSP_SOLTU, RecName: Full=Glycine dehydrogenase (decarboxylating), mitochondrial EC=1.4.4.2 AltName: Full=Glycine cleavage system P protein AltName: Full=Glycine decarboxylase AltName: Full=Glycine dehydrogenase (aminomethyl-transferring) Flags: Precursor	-	345.8	393.8	388.4	350.5	388.9	348.1	1.03724	0.539809	0.0527517	Nonsignificant	None	3	Molecular Function:glycine dehydrogenase (decarboxylating) activity (GO:0004375),Biological Process:glycine catabolic process (GO:0006546),Biological Process:oxidation-reduction process (GO:0055114)	glycine dehydrogenase	1.4.4.2	ko00260 Glycine, serine and threonine metabolism ko00630 Glyoxylate and dicarboxylate metabolism ko01100 Metabolic pathways ko01110 Biosynthesis of secondary metabolites ko01200 Carbon metabolism	Glycine cleavage system protein P (pyridoxal-binding), C-terminal domain	E	Amino acid transport and metabolism ;
TRINITY_DN199952_c0_g2	PREP1_ARATH, RecName: Full=Presequence protease 1, chloroplastic/mitochondrial Short=AtPreP1 Short=PreP 1 EC=3.4.24.- AltName: Full=Zinc metalloprotease 1 Short=AtZnMP1 Flags: Precursor	-	5358.9	5828.3	5613.2	5704.1	5472.8	6077.1	0.97371	0.53591	-0.0384353	Nonsignificant	None	1	Biological Process:proteolysis (GO:0006508)	presequence protease	3.4.24.-	--	Zn-dependent peptidase, M16 (insulinase) family	O	Posttranslational modification, protein turnover, chaperones ;
TRINITY_DN201399_c4_g1	PMA1_WHEAT, RecName: Full=Plasma membrane ATPase EC=3.6.3.6 AltName: Full=Proton pump	-	5091	4930.6	5100.8	4999.1	4874.1	4480.1	1.05358	0.237699	0.0753047	Nonsignificant	None	3	Molecular Function:nucleotide binding (GO:0000166),Cellular Component:integral component of membrane (GO:0016021),Molecular Function:metal ion binding (GO:0046872)	H+-transporting ATPase	3.6.3.6	ko00190 Oxidative phosphorylation	Magnesium-transporting ATPase (P-type)	P	Inorganic ion transport and metabolism ;
TRINITY_DN201610_c3_g1	PMA1_WHEAT, RecName: Full=Plasma membrane ATPase EC=3.6.3.6 AltName: Full=Proton pump	-	411.9	422.1	398.1	401.8	383.3	423.1	1.01978	0.591585	0.0282601	Nonsignificant	None	3	Molecular Function:nucleotide binding (GO:0000166),Cellular Component:integral component of membrane (GO:0016021),Molecular Function:metal ion binding (GO:0046872)	H+-transporting ATPase	3.6.3.6	ko00190 Oxidative phosphorylation	Magnesium-transporting ATPase (P-type)	P	Inorganic ion transport and metabolism ;
TRINITY_DN175716_c1_g1	RCAB_HORVU, RecName: Full=Ribulose bisphosphate carboxylase/oxygenase activase B, chloroplastic Short=RA B Short=RuBisCO activase B Flags: Precursor	-	7670.4	8518.1	7784.4	8766.8	7894.7	8229.6	0.963111	0.45188	-0.0542255	Nonsignificant	None	1	Molecular Function:ATP binding (GO:0005524)	--	--	--	Ribulose bisphosphate carboxylase small subunit	G	Carbohydrate transport and metabolism ;
TRINITY_DN195186_c0_g1	VATA_DAUCA, RecName: Full=V-type proton ATPase catalytic subunit A Short=V-ATPase subunit A EC=3.6.3.14 AltName: Full=V-ATPase 69 kDa subunit AltName: Full=Vacuolar proton pump subunit alpha	-	4199	4278.1	4348.2	4349.5	4365.4	4177.3	0.994811	0.779802	-0.0075059	Nonsignificant	None	3	Molecular Function:ATP binding (GO:0005524),Biological Process:proton transport (GO:0015992),Biological Process:ATP metabolic process (GO:0046034)	V-type H+-transporting ATPase subunit A	3.6.3.14	ko00190 Oxidative phosphorylation ko01100 Metabolic pathways ko04145 Phagosome	Archaeal/vacuolar-type H+-ATPase catalytic subunit A/Vma1	C	Energy production and conversion ;
TRINITY_DN198161_c0_g1	CAPP2_SORBI, RecName: Full=Phosphoenolpyruvate carboxylase 2 Short=PEPC 2 Short=PEPCase 2 EC=4.1.1.31 AltName: Full=CP28	-	4139.9	3984.2	3970.1	3997.5	4068.8	3807.4	1.01857	0.487565	0.0265458	Nonsignificant	None	3	Biological Process:tricarboxylic acid cycle (GO:0006099),Molecular Function:phosphoenolpyruvate carboxylase activity (GO:0008964),Biological Process:carbon fixation (GO:0015977)	phosphoenolpyruvate carboxylase	4.1.1.31	ko00620 Pyruvate metabolism ko00710 Carbon fixation in photosynthetic organisms ko01100 Metabolic pathways ko01200 Carbon metabolism	Phosphoenolpyruvate carboxylase	C	Energy production and conversion ;
TRINITY_DN184716_c0_g6	ATPB_AGRST, RecName: Full=ATP synthase subunit beta, chloroplastic {ECO:0000255|HAMAP-Rule:MF_01347} EC=3.6.3.14 {ECO:0000255|HAMAP-Rule:MF_01347} AltName: Full=ATP synthase F1 sector subunit beta {ECO:0000255|HAMAP-Rule:MF_01347} AltName: Full=F-ATPase subunit beta {ECO:0000255|HAMAP-Rule:MF_01347}	-	1770.1	2013.5	1992.5	2049.2	1757.4	2162.2	0.967715	0.681386	-0.0473452	Nonsignificant	None	1	Molecular Function:ATP binding (GO:0005524)	F-type H+-transporting ATPase subunit beta	3.6.3.14	ko00190 Oxidative phosphorylation ko00195 Photosynthesis ko01100 Metabolic pathways	FoF1-type ATP synthase, beta subunit	C	Energy production and conversion ;
TRINITY_DN178830_c2_g1	HSP72_SOLLC, RecName: Full=Heat shock cognate 70 kDa protein 2	-	5692.1	5337.8	5355.9	6153.2	5421.2	5034.6	0.986562	0.846851	-0.0195191	Nonsignificant	None	--	--	heat shock 70kDa protein 1/2/6/8	--	ko03040 Spliceosome ko04141 Protein processing in endoplasmic reticulum ko04144 Endocytosis	Molecular chaperone DnaK (HSP70)	O	Posttranslational modification, protein turnover, chaperones ;
TRINITY_DN201894_c6_g1	CLH1_ORYSJ, RecName: Full=Clathrin heavy chain 1	-	5412.2	4920.1	5052.6	5031.2	5224.3	4694.7	1.02908	0.534557	0.0413503	Nonsignificant	None	5	Molecular Function:structural molecule activity (GO:0005198),Biological Process:intracellular protein transport (GO:0006886),Biological Process:vesicle-mediated transport (GO:0016192),Cellular Component:clathrin coat of trans-Golgi network vesicle (GO:0030130),Cellular Component:clathrin coat of coated pit (GO:0030132)	clathrin heavy chain	--	ko04144 Endocytosis	--	--	--
TRINITY_DN201305_c3_g1	ACOC_ORYSJ, RecName: Full=Putative aconitate hydratase, cytoplasmic Short=Aconitase EC=4.2.1.3 AltName: Full=Citrate hydro-lyase	-	4716.4	5056.8	5208.2	5148	4595.3	4499.4	1.05187	0.383918	0.0729498	Nonsignificant	None	1	Biological Process:metabolic process (GO:0008152)	aconitate hydratase	4.2.1.3	ko00020 Citrate cycle (TCA cycle) ko00630 Glyoxylate and dicarboxylate metabolism ko01100 Metabolic pathways ko01110 Biosynthesis of secondary metabolites ko01200 Carbon metabolism ko01210 2-Oxocarboxylic acid metabolism ko01230 Biosynthesis of amino acids	Aconitase A	C	Energy production and conversion ;
TRINITY_DN200138_c1_g1	CLPB2_ORYSJ, RecName: Full=Chaperone protein ClpB2, chloroplastic AltName: Full=ATP-dependent Clp protease ATP-binding subunit ClpB homolog 2 AltName: Full=Casein lytic proteinase B2 Flags: Precursor	-	3927.7	3863.6	3478.3	3737.9	3705	3427.6	1.03671	0.48569	0.052018	Nonsignificant	None	1	Molecular Function:ATP binding (GO:0005524)	ATP-dependent Clp protease ATP-binding subunit ClpB	--		ATP-dependent Clp protease ATP-binding subunit ClpA	O	Posttranslational modification, protein turnover, chaperones ;
TRINITY_DN192820_c1_g1	CH62_MAIZE, RecName: Full=Chaperonin CPN60-2, mitochondrial AltName: Full=HSP60-2 Flags: Precursor	-	5301	5063.7	4738.8	4749.6	4733	4537.3	1.07729	0.144254	0.107407	Nonsignificant	None	3	Molecular Function:ATP binding (GO:0005524),Cellular Component:cytoplasm (GO:0005737),Biological Process:protein refolding (GO:0042026)	chaperonin GroEL	--	ko03018 RNA degradation	Chaperonin GroEL (HSP60 family)	O	Posttranslational modification, protein turnover, chaperones ;
TRINITY_DN199106_c1_g1	PPDK1_ORYSJ, RecName: Full=Pyruvate, phosphate dikinase 1, chloroplastic EC=2.7.9.1 AltName: Full=OsPPDKB AltName: Full=Pyruvate, orthophosphate dikinase 1 Flags: Precursor	-	3902	4069.1	3917.4	3956.8	3982.8	3983.3	0.997115	0.850705	-0.00416849	Nonsignificant	None	4	Molecular Function:ATP binding (GO:0005524),Biological Process:pyruvate metabolic process (GO:0006090),Molecular Function:kinase activity (GO:0016301),Biological Process:phosphorylation (GO:0016310)	pyruvate, orthophosphate dikinase	2.7.9.1	ko00620 Pyruvate metabolism ko00710 Carbon fixation in photosynthetic organisms ko01100 Metabolic pathways ko01200 Carbon metabolism	Phosphoenolpyruvate-protein kinase (PTS system EI component in bacteria)	G	Carbohydrate transport and metabolism ;
TRINITY_DN197105_c0_g2	PGMC_BROIN, RecName: Full=Phosphoglucomutase, cytoplasmic Short=PGM EC=5.4.2.2 AltName: Full=Glucose phosphomutase	-	3343.2	3374	3308.2	3438.6	3425.7	3466.7	0.970419	0.0154748	-0.0433201	Nonsignificant	None	2	Biological Process:carbohydrate metabolic process (GO:0005975),Biological Process:organic substance metabolic process (GO:0071704)	phosphoglucomutase	5.4.2.2	ko00010 Glycolysis / Gluconeogenesis ko00030 Pentose phosphate pathway ko00052 Galactose metabolism ko00230 Purine metabolism ko00500 Starch and sucrose metabolism ko00520 Amino sugar and nucleotide sugar metabolism ko01100 Metabolic pathways ko01110 Biosynthesis of secondary metabolites	Phosphoglucomutase	G	Carbohydrate transport and metabolism ;
TRINITY_DN201675_c2_g1	RUBB_BRANA, RecName: Full=RuBisCO large subunit-binding protein subunit beta, chloroplastic AltName: Full=60 kDa chaperonin subunit beta AltName: Full=CPN-60 beta Flags: Precursor	-	4602.7	4835.8	4617.9	5062.9	4860.2	5010.3	0.941273	0.0413637	-0.0873155	Nonsignificant	None	3	Molecular Function:ATP binding (GO:0005524),Cellular Component:cytoplasm (GO:0005737),Biological Process:protein refolding (GO:0042026)	chaperonin GroEL	--	ko03018 RNA degradation	Chaperonin GroEL (HSP60 family)	O	Posttranslational modification, protein turnover, chaperones ;
TRINITY_DN199640_c1_g2	PGMC_BROIN, RecName: Full=Phosphoglucomutase, cytoplasmic Short=PGM EC=5.4.2.2 AltName: Full=Glucose phosphomutase	-	457.8	189.5	319.8	323.5	442.5	506.8	0.759821	0.347344	-0.396269	Nonsignificant	None	2	Biological Process:carbohydrate metabolic process (GO:0005975),Biological Process:organic substance metabolic process (GO:0071704)	phosphoglucomutase	5.4.2.2	ko00010 Glycolysis / Gluconeogenesis ko00030 Pentose phosphate pathway ko00052 Galactose metabolism ko00230 Purine metabolism ko00500 Starch and sucrose metabolism ko00520 Amino sugar and nucleotide sugar metabolism ko01100 Metabolic pathways ko01110 Biosynthesis of secondary metabolites	Phosphoglucomutase	G	Carbohydrate transport and metabolism ;
TRINITY_DN199887_c0_g1	PPDK1_ORYSJ, RecName: Full=Pyruvate, phosphate dikinase 1, chloroplastic EC=2.7.9.1 AltName: Full=OsPPDKB AltName: Full=Pyruvate, orthophosphate dikinase 1 Flags: Precursor	-	348.1	340.3	358.2	343.3	334.3	379.9	0.989693	0.825391	-0.0149475	Nonsignificant	None	4	Molecular Function:ATP binding (GO:0005524),Biological Process:pyruvate metabolic process (GO:0006090),Molecular Function:kinase activity (GO:0016301),Biological Process:phosphorylation (GO:0016310)	pyruvate, orthophosphate dikinase	2.7.9.1	ko00620 Pyruvate metabolism ko00710 Carbon fixation in photosynthetic organisms ko01100 Metabolic pathways ko01200 Carbon metabolism	Phosphoenolpyruvate-protein kinase (PTS system EI component in bacteria)	G	Carbohydrate transport and metabolism ;
TRINITY_DN180345_c0_g1	PSBO_TOBAC, RecName: Full=Oxygen-evolving enhancer protein 1, chloroplastic Short=OEE1 AltName: Full=33 kDa subunit of oxygen evolving system of photosystem II AltName: Full=33 kDa thylakoid membrane protein AltName: Full=OEC 33 kDa subunit Flags: Precursor	-	7340.6	7436.6	7377.4	7707.3	7588	7899.1	0.95517	0.0515963	-0.0661702	Nonsignificant	None	6	Molecular Function:calcium ion binding (GO:0005509),Cellular Component:photosystem II (GO:0009523),Cellular Component:photosystem II oxygen evolving complex (GO:0009654),Biological Process:photosynthesis (GO:0015979),Cellular Component:extrinsic component of membrane (GO:0019898),Biological Process:photosystem II stabilization (GO:0042549)	photosystem II oxygen-evolving enhancer protein 1	--	ko00195 Photosynthesis ko01100 Metabolic pathways	--	--	--
TRINITY_DN194992_c2_g3	RBL_ORYSJ, RecName: Full=Ribulose bisphosphate carboxylase large chain Short=RuBisCO large subunit EC=4.1.1.39 Flags: Precursor	-	480.1	554.5	570	1401	512.4	504.8	0.663551	0.458422	-0.59172	Nonsignificant	None	1	Molecular Function:magnesium ion binding (GO:0000287)	ribulose-bisphosphate carboxylase large chain	4.1.1.39	ko00630 Glyoxylate and dicarboxylate metabolism ko00710 Carbon fixation in photosynthetic organisms ko01100 Metabolic pathways ko01200 Carbon metabolism	Ribulose 1,5-bisphosphate carboxylase, large subunit, or a RuBisCO-like protein	G	Carbohydrate transport and metabolism ;
TRINITY_DN201173_c5_g2	HSP7C_PETHY, RecName: Full=Heat shock cognate 70 kDa protein	-	1486	1351.6	1405.3	1500	1477.3	1422.6	0.964317	0.326223	-0.0524201	Nonsignificant	None	--	--	heat shock 70kDa protein 1/2/6/8	--	ko03040 Spliceosome ko04141 Protein processing in endoplasmic reticulum ko04144 Endocytosis	Molecular chaperone DnaK (HSP70)	O	Posttranslational modification, protein turnover, chaperones ;
TRINITY_DN170003_c1_g1	CLPAA_SOLLC, RecName: Full=ATP-dependent Clp protease ATP-binding subunit ClpA homolog CD4A, chloroplastic Flags: Precursor	-	1579.4	1555.7	1547.5	1598.9	1630.2	1550.8	0.979644	0.295254	-0.0296706	Nonsignificant	None	3	Molecular Function:protein binding (GO:0005515),Molecular Function:ATP binding (GO:0005524),Biological Process:protein metabolic process (GO:0019538)	ATP-dependent Clp protease ATP-binding subunit ClpC	--	ko01100 Metabolic pathways	ATP-dependent Clp protease ATP-binding subunit ClpA	O	Posttranslational modification, protein turnover, chaperones ;
TRINITY_DN201748_c0_g1	PGKH_WHEAT, RecName: Full=Phosphoglycerate kinase, chloroplastic EC=2.7.2.3 Flags: Precursor	-	10704.9	11618.3	10631.7	10160.5	10918.1	11821.7	1.00166	0.976509	0.00239225	Nonsignificant	None	2	Molecular Function:phosphoglycerate kinase activity (GO:0004618),Biological Process:glycolytic process (GO:0006096)	phosphoglycerate kinase	2.7.2.3	ko00010 Glycolysis / Gluconeogenesis ko00710 Carbon fixation in photosynthetic organisms ko01100 Metabolic pathways ko01110 Biosynthesis of secondary metabolites ko01200 Carbon metabolism ko01230 Biosynthesis of amino acids	3-phosphoglycerate kinase	G	Carbohydrate transport and metabolism ;
TRINITY_DN199137_c2_g2	ENPL_HORVU, RecName: Full=Endoplasmin homolog AltName: Full=Glucose-regulated protein 94 homolog Short=GRP-94 homolog Flags: Precursor	-	5223.1	4149.4	4558.4	4352.8	3803.7	3795.3	1.16559	0.160055	0.221061	Nonsignificant	None	4	Molecular Function:ATP binding (GO:0005524),Biological Process:protein folding (GO:0006457),Biological Process:response to stress (GO:0006950),Molecular Function:unfolded protein binding (GO:0051082)	heat shock protein 90kDa beta	--	ko04141 Protein processing in endoplasmic reticulum ko04626 Plant-pathogen interaction	Molecular chaperone, HSP90 family	O	Posttranslational modification, protein turnover, chaperones ;
TRINITY_DN201164_c2_g1	EFTU2_SOYBN, RecName: Full=Elongation factor Tu, chloroplastic Short=EF-Tu Flags: Precursor	-	3745.7	3772	3896.4	3970.3	4388.3	4460.3	0.890412	0.0812352	-0.167455	Nonsignificant	None	2	Molecular Function:GTPase activity (GO:0003924),Molecular Function:GTP binding (GO:0005525)	elongation factor Tu	--	--	Translation elongation factor EF-Tu, a GTPase	J	Translation, ribosomal structure and biogenesis ;
TRINITY_DN200348_c2_g1	--	-	3743.3	3738.8	3754.4	3783	3968.5	4150.8	0.944061	0.171522	-0.0830477	Nonsignificant	None	4	Molecular Function:nucleic acid binding (GO:0003676),Molecular Function:translation elongation factor activity (GO:0003746),Cellular Component:intracellular (GO:0005622),Biological Process:translational elongation (GO:0006414)	elongation factor Ts	--	--	Translation elongation factor EF-Ts	J	Translation, ribosomal structure and biogenesis ;
TRINITY_DN175771_c2_g1	HSP7S_PEA, RecName: Full=Stromal 70 kDa heat shock-related protein, chloroplastic Flags: Precursor	-	2398.4	2549.3	2269.6	2466.9	2260.9	2430.8	1.0082	0.858797	0.0117818	Nonsignificant	None	--	--	heat shock 70kDa protein 1/2/6/8	--	ko03040 Spliceosome ko04141 Protein processing in endoplasmic reticulum ko04144 Endocytosis	Molecular chaperone DnaK (HSP70)	O	Posttranslational modification, protein turnover, chaperones ;
TRINITY_DN193344_c2_g1	ATPA_WHEAT, RecName: Full=ATP synthase subunit alpha, chloroplastic {ECO:0000255|HAMAP-Rule:MF_01346} EC=3.6.3.14 {ECO:0000255|HAMAP-Rule:MF_01346} AltName: Full=ATP synthase F1 sector subunit alpha {ECO:0000255|HAMAP-Rule:MF_01346} AltName: Full=F-ATPase subunit alpha {ECO:0000255|HAMAP-Rule:MF_01346}	-	8341.4	9167.6	8760.5	8899.2	8231.5	9160.6	0.999171	0.9851	-0.00119674	Nonsignificant	None	4	Molecular Function:ATP binding (GO:0005524),Biological Process:ATP synthesis coupled proton transport (GO:0015986),Biological Process:proton transport (GO:0015992),Biological Process:ATP metabolic process (GO:0046034)	F-type H+-transporting ATPase subunit alpha	3.6.3.14	ko00190 Oxidative phosphorylation ko00195 Photosynthesis ko01100 Metabolic pathways	FoF1-type ATP synthase, alpha subunit	C	Energy production and conversion ;
TRINITY_DN201951_c4_g3	TKTC_MAIZE, RecName: Full=Transketolase, chloroplastic Short=TK EC=2.2.1.1	-	7177.7	8230.6	7662	7604.7	7432.1	8270	0.989853	0.852659	-0.0147142	Nonsignificant	None	--	--	transketolase	2.2.1.1	ko00030 Pentose phosphate pathway ko00710 Carbon fixation in photosynthetic organisms ko01100 Metabolic pathways ko01110 Biosynthesis of secondary metabolites ko01200 Carbon metabolism ko01230 Biosynthesis of amino acids	Transketolase	G	Carbohydrate transport and metabolism ;
TRINITY_DN194953_c0_g4	CD48E_ARATH, RecName: Full=Cell division control protein 48 homolog E Short=AtCDC48e AltName: Full=Transitional endoplasmic reticulum ATPase E	-	3105.2	2953.1	3089.4	3184.1	3200.5	2900.3	0.985223	0.703071	-0.0214773	Nonsignificant	None	1	Molecular Function:ATP binding (GO:0005524)	transitional endoplasmic reticulum ATPase	--	ko04141 Protein processing in endoplasmic reticulum	ATP-dependent 26S proteasome regulatory subunit	O	Posttranslational modification, protein turnover, chaperones ;
TRINITY_DN173391_c0_g2	FTSH1_ORYSJ, RecName: Full=ATP-dependent zinc metalloprotease FTSH 1, chloroplastic Short=OsFTSH1 EC=3.4.24.- Flags: Precursor	-	3262.2	3225	3177.7	3280	3172.5	3332.5	0.987726	0.505277	-0.017817	Nonsignificant	None	3	Molecular Function:metalloendopeptidase activity (GO:0004222),Molecular Function:ATP binding (GO:0005524),Biological Process:proteolysis (GO:0006508)	cell division protease FtsH	3.4.24.-	--	ATP-dependent Zn proteases	O	Posttranslational modification, protein turnover, chaperones ;
TRINITY_DN197787_c0_g2	HSP7S_PEA, RecName: Full=Stromal 70 kDa heat shock-related protein, chloroplastic Flags: Precursor	-	4063.2	4406.4	4292.8	4428.4	4444.4	4559.6	0.950121	0.144944	-0.0738174	Nonsignificant	None	--	--	heat shock 70kDa protein 1/2/6/8	--	ko03040 Spliceosome ko04141 Protein processing in endoplasmic reticulum ko04144 Endocytosis	Molecular chaperone DnaK (HSP70)	O	Posttranslational modification, protein turnover, chaperones ;
TRINITY_DN199180_c0_g2	CAPP2_MAIZE, RecName: Full=Phosphoenolpyruvate carboxylase 2 Short=PEPC 2 Short=PEPCase 2 EC=4.1.1.31	-	117.9	106.1	111.3	106.8	140.5	109.7	0.939216	0.578248	-0.0904716	Nonsignificant	None	3	Biological Process:tricarboxylic acid cycle (GO:0006099),Molecular Function:phosphoenolpyruvate carboxylase activity (GO:0008964),Biological Process:carbon fixation (GO:0015977)	phosphoenolpyruvate carboxylase	4.1.1.31	ko00620 Pyruvate metabolism ko00710 Carbon fixation in photosynthetic organisms ko01100 Metabolic pathways ko01200 Carbon metabolism	Phosphoenolpyruvate carboxylase	C	Energy production and conversion ;
TRINITY_DN196926_c1_g3	RUBA_WHEAT, RecName: Full=RuBisCO large subunit-binding protein subunit alpha, chloroplastic AltName: Full=60 kDa chaperonin subunit alpha AltName: Full=CPN-60 alpha Flags: Precursor Fragment	-	1510	1521.6	1502.6	1604.6	1647.5	1551.7	0.943878	0.0780576	-0.0833281	Nonsignificant	None	3	Molecular Function:ATP binding (GO:0005524),Cellular Component:cytoplasm (GO:0005737),Biological Process:protein refolding (GO:0042026)	--	--	--	Chaperonin GroEL (HSP60 family)	O	Posttranslational modification, protein turnover, chaperones ;
TRINITY_DN200555_c3_g1	HSP81_ORYSJ, RecName: Full=Heat shock protein 81-1 Short=HSP81-1 AltName: Full=Heat shock protein 82	-	4850.8	4520.4	4773.3	5148.8	4855.3	4409.6	0.981323	0.731539	-0.0271995	Nonsignificant	None	4	Molecular Function:ATP binding (GO:0005524),Biological Process:protein folding (GO:0006457),Biological Process:response to stress (GO:0006950),Molecular Function:unfolded protein binding (GO:0051082)	molecular chaperone HtpG	--	ko04141 Protein processing in endoplasmic reticulum ko04626 Plant-pathogen interaction	Molecular chaperone, HSP90 family	O	Posttranslational modification, protein turnover, chaperones ;
TRINITY_DN201779_c4_g1	TPIC_SECCE, RecName: Full=Triosephosphate isomerase, chloroplastic Short=TIM Short=Triose-phosphate isomerase EC=5.3.1.1 Flags: Precursor	-	3648.8	4205.6	3657.3	3635.6	3878.9	4450.5	0.962115	0.646694	-0.0557195	Nonsignificant	None	2	Molecular Function:triose-phosphate isomerase activity (GO:0004807),Biological Process:metabolic process (GO:0008152)	triosephosphate isomerase (TIM)	5.3.1.1	ko00010 Glycolysis / Gluconeogenesis ko00051 Fructose and mannose metabolism ko00562 Inositol phosphate metabolism ko00710 Carbon fixation in photosynthetic organisms ko01100 Metabolic pathways ko01110 Biosynthesis of secondary metabolites ko01200 Carbon metabolism ko01230 Biosynthesis of amino acids	Triosephosphate isomerase	G	Carbohydrate transport and metabolism ;
TRINITY_DN201941_c2_g1	HPR1_ARATH, RecName: Full=Glycerate dehydrogenase HPR, peroxisomal Short=GDH EC=1.1.1.29 AltName: Full=NADH-dependent hydroxypyruvate reductase 1 Short=AtHPR1 Short=HPR 1	-	3046.1	3196.8	3061.1	3488.9	3367.2	3760.3	0.87638	0.0481729	-0.190372	Nonsignificant	None	3	Biological Process:metabolic process (GO:0008152),Molecular Function:NAD binding (GO:0051287),Biological Process:oxidation-reduction process (GO:0055114)	hydroxypyruvate reductase 1	--	ko00260 Glycine, serine and threonine metabolism ko00630 Glyoxylate and dicarboxylate metabolism ko01100 Metabolic pathways ko01110 Biosynthesis of secondary metabolites ko01200 Carbon metabolism	Lactate dehydrogenase or related 2-hydroxyacid dehydrogenase	CHR	Energy production and conversion ; Coenzyme transport and metabolism ; General function prediction only ;
TRINITY_DN197666_c0_g4	UGPA_HORVU, RecName: Full=UTP--glucose-1-phosphate uridylyltransferase EC=2.7.7.9 AltName: Full=UDP-glucose pyrophosphorylase Short=UDPGP Short=UGPase	-	3987.3	4267.7	4013.2	4179.9	3791.2	4074.5	1.01848	0.64087	0.0264173	Nonsignificant	None	2	Biological Process:metabolic process (GO:0008152),Molecular Function:uridylyltransferase activity (GO:0070569)	UTP--glucose-1-phosphate uridylyltransferase	2.7.7.9	ko00040 Pentose and glucuronate interconversions ko00052 Galactose metabolism ko00500 Starch and sucrose metabolism ko00520 Amino sugar and nucleotide sugar metabolism ko01100 Metabolic pathways	UDP-N-acetylglucosamine pyrophosphorylase	G	Carbohydrate transport and metabolism ;
TRINITY_DN201712_c5_g1	PSA_ORYSJ, RecName: Full=Puromycin-sensitive aminopeptidase Short=PSA EC=3.4.11.14 AltName: Full=Cytosol alanyl aminopeptidase Short=AAP-S	-	3306.6	3181.8	3172.1	3216.4	3161	3001.2	1.03006	0.301871	0.0427253	Nonsignificant	None	3	Biological Process:proteolysis (GO:0006508),Molecular Function:metallopeptidase activity (GO:0008237),Molecular Function:zinc ion binding (GO:0008270)	aminopeptidase N	3.4.11.2	ko00480 Glutathione metabolism ko01100 Metabolic pathways	Aminopeptidase N	E	Amino acid transport and metabolism ;
TRINITY_DN201231_c1_g2	AOR_ARATH, RecName: Full=NADPH-dependent alkenal/one oxidoreductase, chloroplastic {ECO:0000303|PubMed:21169366} Short=AtAOR {ECO:0000303|PubMed:21169366} EC=1.3.1.- {ECO:0000269|PubMed:21169366} Flags: Precursor	-	3764.8	4067.6	3869.4	3937.4	3926.9	3997.7	0.986495	0.612746	-0.0196168	Nonsignificant	None	2	Molecular Function:oxidoreductase activity (GO:0016491),Biological Process:oxidation-reduction process (GO:0055114)	2-methylene-furan-3-one reductase	1.3.1.105	--	NADPH:quinone reductase or related Zn-dependent oxidoreductase	CR	Energy production and conversion ; General function prediction only ;
TRINITY_DN192934_c0_g1	DLDH1_ARATH, RecName: Full=Dihydrolipoyl dehydrogenase 1, mitochondrial Short=AtmLPD1 Short=mtLPD1 EC=1.8.1.4 AltName: Full=Dihydrolipoamide dehydrogenase 1 AltName: Full=Glycine cleavage system L protein 1 AltName: Full=Pyruvate dehydrogenase complex E3 subunit 1 Short=E3-1 Short=PDC-E3 1 Flags: Precursor	-	3914.5	3780.7	3997.8	3659.5	3206.7	4311	1.04615	0.64785	0.0650863	Nonsignificant	None	3	Molecular Function:oxidoreductase activity (GO:0016491),Biological Process:cell redox homeostasis (GO:0045454),Biological Process:oxidation-reduction process (GO:0055114)	dihydrolipoamide dehydrogenase	1.8.1.4	ko00010 Glycolysis / Gluconeogenesis ko00020 Citrate cycle (TCA cycle) ko00260 Glycine, serine and threonine metabolism ko00280 Valine, leucine and isoleucine degradation ko00620 Pyruvate metabolism ko00630 Glyoxylate and dicarboxylate metabolism ko00640 Propanoate metabolism ko01100 Metabolic pathways ko01110 Biosynthesis of secondary metabolites ko01200 Carbon metabolism	Pyruvate/2-oxoglutarate dehydrogenase complex, dihydrolipoamide dehydrogenase (E3) component or related enzyme	C	Energy production and conversion ;
TRINITY_DN181732_c1_g3	PSBO_TOBAC, RecName: Full=Oxygen-evolving enhancer protein 1, chloroplastic Short=OEE1 AltName: Full=33 kDa subunit of oxygen evolving system of photosystem II AltName: Full=33 kDa thylakoid membrane protein AltName: Full=OEC 33 kDa subunit Flags: Precursor	-	389.1	397.2	393.2	354.4	334.6	430.9	1.05322	0.568761	0.0748055	Nonsignificant	None	6	Molecular Function:calcium ion binding (GO:0005509),Cellular Component:photosystem II (GO:0009523),Cellular Component:photosystem II oxygen evolving complex (GO:0009654),Biological Process:photosynthesis (GO:0015979),Cellular Component:extrinsic component of membrane (GO:0019898),Biological Process:photosystem II stabilization (GO:0042549)	photosystem II oxygen-evolving enhancer protein 1	--	ko00195 Photosynthesis ko01100 Metabolic pathways	--	--	--
TRINITY_DN201156_c3_g2	GAPN_WHEAT, RecName: Full=NADP-dependent glyceraldehyde-3-phosphate dehydrogenase EC=1.2.1.9 AltName: Full=Glyceraldehyde-3-phosphate dehydrogenase [NADP(+)] AltName: Full=Non-phosphorylating glyceraldehyde 3-phosphate dehydrogenase AltName: Full=Triosephosphate dehydrogenase	-	3362.1	3543.3	3457.3	3411.2	3394.4	3524.9	1.00312	0.879975	0.00448986	Nonsignificant	None	3	Biological Process:metabolic process (GO:0008152),Molecular Function:oxidoreductase activity (GO:0016491),Biological Process:oxidation-reduction process (GO:0055114)	glyceraldehyde-3-phosphate dehydrogenase (NADP+)	1.2.1.9	ko00010 Glycolysis / Gluconeogenesis ko00030 Pentose phosphate pathway ko01100 Metabolic pathways ko01200 Carbon metabolism	Acyl-CoA reductase or other NAD-dependent aldehyde dehydrogenase	C	Energy production and conversion ;
TRINITY_DN198006_c0_g2	BIP1_ORYSJ, RecName: Full=Heat shock 70 kDa protein BIP1 {ECO:0000305} AltName: Full=Luminal-binding protein 1 {ECO:0000305} Short=OsBiP1 {ECO:0000303|PubMed:22050533} Flags: Precursor	-	439.9	364	401.2	414.6	367.7	355.6	1.05906	0.475258	0.0827791	Nonsignificant	None	--	--	heat shock 70kDa protein 5	--	ko03060 Protein export ko04141 Protein processing in endoplasmic reticulum	Molecular chaperone DnaK (HSP70)	O	Posttranslational modification, protein turnover, chaperones ;
TRINITY_DN193445_c0_g1	DLDH1_ARATH, RecName: Full=Dihydrolipoyl dehydrogenase 1, mitochondrial Short=AtmLPD1 Short=mtLPD1 EC=1.8.1.4 AltName: Full=Dihydrolipoamide dehydrogenase 1 AltName: Full=Glycine cleavage system L protein 1 AltName: Full=Pyruvate dehydrogenase complex E3 subunit 1 Short=E3-1 Short=PDC-E3 1 Flags: Precursor	-	742.2	648.1	756.4	675.1	605.3	774.1	1.04488	0.636445	0.0633333	Nonsignificant	None	3	Molecular Function:oxidoreductase activity (GO:0016491),Biological Process:cell redox homeostasis (GO:0045454),Biological Process:oxidation-reduction process (GO:0055114)	dihydrolipoamide dehydrogenase	1.8.1.4	ko00010 Glycolysis / Gluconeogenesis ko00020 Citrate cycle (TCA cycle) ko00260 Glycine, serine and threonine metabolism ko00280 Valine, leucine and isoleucine degradation ko00620 Pyruvate metabolism ko00630 Glyoxylate and dicarboxylate metabolism ko00640 Propanoate metabolism ko01100 Metabolic pathways ko01110 Biosynthesis of secondary metabolites ko01200 Carbon metabolism	Pyruvate/2-oxoglutarate dehydrogenase complex, dihydrolipoamide dehydrogenase (E3) component or related enzyme	C	Energy production and conversion ;
TRINITY_DN177650_c0_g3	PGKY_WHEAT, RecName: Full=Phosphoglycerate kinase, cytosolic EC=2.7.2.3	-	3965.1	3918.9	3669.1	3850.8	3537.5	3429.4	1.06798	0.198436	0.0948862	Nonsignificant	None	2	Molecular Function:phosphoglycerate kinase activity (GO:0004618),Biological Process:glycolytic process (GO:0006096)	phosphoglycerate kinase	2.7.2.3	ko00010 Glycolysis / Gluconeogenesis ko00710 Carbon fixation in photosynthetic organisms ko01100 Metabolic pathways ko01110 Biosynthesis of secondary metabolites ko01200 Carbon metabolism ko01230 Biosynthesis of amino acids	3-phosphoglycerate kinase	G	Carbohydrate transport and metabolism ;
TRINITY_DN198420_c0_g3	RUBA_WHEAT, RecName: Full=RuBisCO large subunit-binding protein subunit alpha, chloroplastic AltName: Full=60 kDa chaperonin subunit alpha AltName: Full=CPN-60 alpha Flags: Precursor Fragment	-	3814.5	3953.9	3656	4003.9	3898.7	4027.9	0.957579	0.179124	-0.0625361	Nonsignificant	None	3	Molecular Function:ATP binding (GO:0005524),Cellular Component:cytoplasm (GO:0005737),Biological Process:protein refolding (GO:0042026)	--	--	--	Chaperonin GroEL (HSP60 family)	O	Posttranslational modification, protein turnover, chaperones ;
TRINITY_DN199196_c1_g1	--	-	211	213.8	229.2	209.8	213.9	225	1.00817	0.82011	0.0117392	Nonsignificant	None	4	Molecular Function:nucleic acid binding (GO:0003676),Molecular Function:translation elongation factor activity (GO:0003746),Cellular Component:intracellular (GO:0005622),Biological Process:translational elongation (GO:0006414)	elongation factor Ts	--	--	Translation elongation factor EF-Ts	J	Translation, ribosomal structure and biogenesis ;
TRINITY_DN199718_c8_g4	FTSH1_ORYSJ, RecName: Full=ATP-dependent zinc metalloprotease FTSH 1, chloroplastic Short=OsFTSH1 EC=3.4.24.- Flags: Precursor	-	995.7	1001.3	982.8	1013	1152.3	1030	0.932557	0.242018	-0.100736	Nonsignificant	None	1	Molecular Function:ATP binding (GO:0005524)	cell division protease FtsH	3.4.24.-	--	ATP-dependent Zn proteases	O	Posttranslational modification, protein turnover, chaperones ;
TRINITY_DN198279_c2_g5	RCAA_HORVU, RecName: Full=Ribulose bisphosphate carboxylase/oxygenase activase A, chloroplastic Short=RA A Short=RuBisCO activase A Flags: Precursor	-	8687.2	10022.1	9612.4	9643.5	9455.9	11677.6	0.920223	0.385845	-0.119945	Nonsignificant	None	--	--	--	--	--	Ribulose bisphosphate carboxylase small subunit	G	Carbohydrate transport and metabolism ;
TRINITY_DN201679_c0_g1	PHSH_WHEAT, RecName: Full=Alpha-glucan phosphorylase, H isozyme EC=2.4.1.1 AltName: Full=Starch phosphorylase H	-	3158.1	3493.3	3322	3310.2	3353.8	3099.4	1.02151	0.605542	0.0307018	Nonsignificant	None	2	Biological Process:carbohydrate metabolic process (GO:0005975),Molecular Function:glycogen phosphorylase activity (GO:0008184)	glycogen phosphorylase	2.4.1.1	ko00500 Starch and sucrose metabolism ko01100 Metabolic pathways ko01110 Biosynthesis of secondary metabolites	Glucan phosphorylase	G	Carbohydrate transport and metabolism ;
TRINITY_DN192215_c1_g1	PTA16_ARATH, RecName: Full=Protein plastid transcriptionally active 16, chloroplastic {ECO:0000303|PubMed:16326926} Short=pTAC16 {ECO:0000303|PubMed:16326926} Flags: Precursor	-	1855.8	1869.7	1884.9	1745.1	1816.3	2035.4	1.00243	0.963421	0.00350144	Nonsignificant	None	--	--	--	--	--	--	--	--
TRINITY_DN201871_c4_g1	PGKH_WHEAT, RecName: Full=Phosphoglycerate kinase, chloroplastic EC=2.7.2.3 Flags: Precursor	-	820.1	860.2	802.3	725.9	672.6	984	1.04201	0.763455	0.0593756	Nonsignificant	None	2	Molecular Function:phosphoglycerate kinase activity (GO:0004618),Biological Process:glycolytic process (GO:0006096)	phosphoglycerate kinase	2.7.2.3	ko00010 Glycolysis / Gluconeogenesis ko00710 Carbon fixation in photosynthetic organisms ko01100 Metabolic pathways ko01110 Biosynthesis of secondary metabolites ko01200 Carbon metabolism ko01230 Biosynthesis of amino acids	3-phosphoglycerate kinase	G	Carbohydrate transport and metabolism ;
TRINITY_DN200477_c2_g6	ISPG_ORYSJ, RecName: Full=4-hydroxy-3-methylbut-2-en-1-yl diphosphate synthase (ferredoxin), chloroplastic EC=1.17.7.1 AltName: Full=1-hydroxy-2-methyl-2-(E)-butenyl 4-diphosphate synthase Flags: Precursor	-	3418.7	3567.6	3314.3	3350.2	3143.3	3463.7	1.03449	0.394024	0.0489164	Nonsignificant	None	3	Biological Process:terpenoid biosynthetic process (GO:0016114),Molecular Function:4-hydroxy-3-methylbut-2-en-1-yl diphosphate synthase activity (GO:0046429),Biological Process:oxidation-reduction process (GO:0055114)	--	--	ko00900 Terpenoid backbone biosynthesis ko01100 Metabolic pathways ko01110 Biosynthesis of secondary metabolites	4-hydroxy-3-methylbut-2-en-1-yl diphosphate synthase IspG/GcpE	I	Lipid transport and metabolism ;
TRINITY_DN178163_c6_g3	HSP7C_PETHY, RecName: Full=Heat shock cognate 70 kDa protein	-	562.7	527	456.1	564.5	510.6	419.5	1.03426	0.763368	0.0485942	Nonsignificant	None	--	--	heat shock 70kDa protein 1/2/6/8	--	ko03040 Spliceosome ko04141 Protein processing in endoplasmic reticulum ko04144 Endocytosis	Molecular chaperone DnaK (HSP70)	O	Posttranslational modification, protein turnover, chaperones ;
TRINITY_DN186682_c1_g1	DLDH1_ARATH, RecName: Full=Dihydrolipoyl dehydrogenase 1, mitochondrial Short=AtmLPD1 Short=mtLPD1 EC=1.8.1.4 AltName: Full=Dihydrolipoamide dehydrogenase 1 AltName: Full=Glycine cleavage system L protein 1 AltName: Full=Pyruvate dehydrogenase complex E3 subunit 1 Short=E3-1 Short=PDC-E3 1 Flags: Precursor	-	2896.5	2645.2	2795.3	2753.5	2456.4	2690.6	1.05525	0.281484	0.0775844	Nonsignificant	None	3	Molecular Function:oxidoreductase activity (GO:0016491),Biological Process:cell redox homeostasis (GO:0045454),Biological Process:oxidation-reduction process (GO:0055114)	dihydrolipoamide dehydrogenase	1.8.1.4	ko00010 Glycolysis / Gluconeogenesis ko00020 Citrate cycle (TCA cycle) ko00260 Glycine, serine and threonine metabolism ko00280 Valine, leucine and isoleucine degradation ko00620 Pyruvate metabolism ko00630 Glyoxylate and dicarboxylate metabolism ko00640 Propanoate metabolism ko01100 Metabolic pathways ko01110 Biosynthesis of secondary metabolites ko01200 Carbon metabolism	Pyruvate/2-oxoglutarate dehydrogenase complex, dihydrolipoamide dehydrogenase (E3) component or related enzyme	C	Energy production and conversion ;
TRINITY_DN195137_c0_g1	TI110_ARATH, RecName: Full=Protein TIC110, chloroplastic AltName: Full=Translocon at the inner envelope membrane of chloroplasts 110 Short=AtTIC110 Flags: Precursor	-	3495.6	3365.8	3500.7	3471.9	3353.4	3463.3	1.00714	0.696531	0.0102697	Nonsignificant	None	1	Cellular Component:chloroplast (GO:0009507)	--	--	--	--	--	--
TRINITY_DN199639_c2_g3	BIP1_ORYSJ, RecName: Full=Heat shock 70 kDa protein BIP1 {ECO:0000305} AltName: Full=Luminal-binding protein 1 {ECO:0000305} Short=OsBiP1 {ECO:0000303|PubMed:22050533} Flags: Precursor	-	2998.7	2429.8	2652	2755.5	2599.9	2515.8	1.02659	0.726579	0.037861	Nonsignificant	None	--	--	heat shock 70kDa protein 5	--	ko03060 Protein export ko04141 Protein processing in endoplasmic reticulum	Molecular chaperone DnaK (HSP70)	O	Posttranslational modification, protein turnover, chaperones ;
TRINITY_DN199263_c1_g4	EFGC2_SOYBN, RecName: Full=Elongation factor G-2, chloroplastic Short=cEF-G 2 {ECO:0000255|HAMAP-Rule:MF_03063} Flags: Precursor	-	2943.5	2972.9	2838.3	2967.8	3015.5	3132.4	0.960398	0.13423	-0.0582957	Nonsignificant	None	2	Molecular Function:GTPase activity (GO:0003924),Molecular Function:GTP binding (GO:0005525)	elongation factor G	--	--	Translation elongation factor EF-G, a GTPase	J	Translation, ribosomal structure and biogenesis ;
TRINITY_DN201977_c3_g2	TKTC_MAIZE, RecName: Full=Transketolase, chloroplastic Short=TK EC=2.2.1.1	-	191.2	243.6	196.5	208	219.7	238.7	0.947329	0.578932	-0.0780626	Nonsignificant	None	--	--	transketolase	2.2.1.1	ko00030 Pentose phosphate pathway ko00710 Carbon fixation in photosynthetic organisms ko01100 Metabolic pathways ko01110 Biosynthesis of secondary metabolites ko01200 Carbon metabolism ko01230 Biosynthesis of amino acids	Transketolase	G	Carbohydrate transport and metabolism ;
TRINITY_DN200852_c3_g1	NDUS1_SOLTU, RecName: Full=NADH dehydrogenase [ubiquinone] iron-sulfur protein 1, mitochondrial EC=1.6.5.3 EC=1.6.99.3 AltName: Full=76 kDa mitochondrial complex I subunit AltName: Full=Complex I-76kD Short=CI-76kD AltName: Full=NADH-ubiquinone oxidoreductase 76 kDa subunit Flags: Precursor	-	2545.2	2428.1	2532.1	2433.5	2398.5	2417.8	1.03526	0.140131	0.0499878	Nonsignificant	None	4	Molecular Function:electron carrier activity (GO:0009055),Molecular Function:oxidoreductase activity (GO:0016491),Molecular Function:iron-sulfur cluster binding (GO:0051536),Biological Process:oxidation-reduction process (GO:0055114)	--	--	ko00190 Oxidative phosphorylation ko01100 Metabolic pathways	NADH dehydrogenase/NADH:ubiquinone oxidoreductase 75 kD subunit (chain G)	C	Energy production and conversion ;
TRINITY_DN186682_c1_g2	DLDH1_ARATH, RecName: Full=Dihydrolipoyl dehydrogenase 1, mitochondrial Short=AtmLPD1 Short=mtLPD1 EC=1.8.1.4 AltName: Full=Dihydrolipoamide dehydrogenase 1 AltName: Full=Glycine cleavage system L protein 1 AltName: Full=Pyruvate dehydrogenase complex E3 subunit 1 Short=E3-1 Short=PDC-E3 1 Flags: Precursor	-	224.6	218.9	254.4	251.7	278.9	216.7	0.933895	0.487138	-0.0986672	Nonsignificant	None	3	Molecular Function:oxidoreductase activity (GO:0016491),Biological Process:cell redox homeostasis (GO:0045454),Biological Process:oxidation-reduction process (GO:0055114)	dihydrolipoamide dehydrogenase	1.8.1.4	ko00010 Glycolysis / Gluconeogenesis ko00020 Citrate cycle (TCA cycle) ko00260 Glycine, serine and threonine metabolism ko00280 Valine, leucine and isoleucine degradation ko00620 Pyruvate metabolism ko00630 Glyoxylate and dicarboxylate metabolism ko00640 Propanoate metabolism ko01100 Metabolic pathways ko01110 Biosynthesis of secondary metabolites ko01200 Carbon metabolism	Pyruvate/2-oxoglutarate dehydrogenase complex, dihydrolipoamide dehydrogenase (E3) component or related enzyme	C	Energy production and conversion ;
TRINITY_DN187580_c0_g2	ATPAM_WHEAT, RecName: Full=ATP synthase subunit alpha, mitochondrial	-	5348	5385.9	5549.1	5297.8	5137.6	5211.4	1.04066	0.0558638	0.0574989	Nonsignificant	None	4	Molecular Function:ATP binding (GO:0005524),Biological Process:ATP synthesis coupled proton transport (GO:0015986),Biological Process:proton transport (GO:0015992),Biological Process:ATP metabolic process (GO:0046034)	F-type H+-transporting ATPase subunit alpha	--	ko00190 Oxidative phosphorylation ko01100 Metabolic pathways	FoF1-type ATP synthase, alpha subunit	C	Energy production and conversion ;
TRINITY_DN201458_c6_g3	CLPC1_ORYSJ, RecName: Full=Chaperone protein ClpC1, chloroplastic AltName: Full=ATP-dependent Clp protease ATP-binding subunit ClpC homolog 1 AltName: Full=Casein lytic proteinase C1 Flags: Precursor	-	707	780.2	773.4	741.2	633.4	736.8	1.07066	0.313558	0.0985058	Nonsignificant	None	1	Molecular Function:ATP binding (GO:0005524)	ATP-dependent Clp protease ATP-binding subunit ClpC	--	ko01100 Metabolic pathways	ATP-dependent Clp protease ATP-binding subunit ClpA	O	Posttranslational modification, protein turnover, chaperones ;
TRINITY_DN199267_c0_g1	ICDHC_ARATH, RecName: Full=Cytosolic isocitrate dehydrogenase [NADP] EC=1.1.1.42	-	2966.5	2959.5	3173.2	2946.9	2878.6	2851.5	1.04866	0.172142	0.0685434	Nonsignificant	None	3	Molecular Function:isocitrate dehydrogenase (NADP+) activity (GO:0004450),Biological Process:isocitrate metabolic process (GO:0006102),Biological Process:oxidation-reduction process (GO:0055114)	isocitrate dehydrogenase	1.1.1.42	ko00020 Citrate cycle (TCA cycle) ko00480 Glutathione metabolism ko01100 Metabolic pathways ko01110 Biosynthesis of secondary metabolites ko01200 Carbon metabolism ko01210 2-Oxocarboxylic acid metabolism ko01230 Biosynthesis of amino acids ko04146 Peroxisome	Isocitrate dehydrogenase	C	Energy production and conversion ;
TRINITY_DN201937_c1_g1	LOX23_HORVU, RecName: Full=Lipoxygenase 2.3, chloroplastic EC=1.13.11.12 AltName: Full=LOX2:Hv:3 Flags: Precursor	-	3106.4	4739.5	3678	4042.7	3961.1	3622.1	0.991226	0.950827	-0.0127134	Nonsignificant	None	3	Molecular Function:oxidoreductase activity (GO:0016491),Molecular Function:metal ion binding (GO:0046872),Biological Process:oxidation-reduction process (GO:0055114)	lipoxygenase	1.13.11.12	ko00591 Linoleic acid metabolism ko00592 alpha-Linolenic acid metabolism ko01100 Metabolic pathways ko01110 Biosynthesis of secondary metabolites	--	--	--
TRINITY_DN177241_c0_g2	RCA_ARATH, RecName: Full=Ribulose bisphosphate carboxylase/oxygenase activase, chloroplastic Short=RA Short=RuBisCO activase Flags: Precursor	-	727.5	715.8	752.2	2510.3	850	750.2	0.53412	0.379725	-0.904764	Nonsignificant	None	1	Molecular Function:ATP binding (GO:0005524)	--	--	--	Ribulose bisphosphate carboxylase small subunit	G	Carbohydrate transport and metabolism ;
TRINITY_DN177650_c0_g1	PGKY_WHEAT, RecName: Full=Phosphoglycerate kinase, cytosolic EC=2.7.2.3	-	1435.9	1470.9	1361.6	1445.9	1375.3	1609.7	0.963326	0.533069	-0.0539044	Nonsignificant	None	2	Molecular Function:phosphoglycerate kinase activity (GO:0004618),Biological Process:glycolytic process (GO:0006096)	phosphoglycerate kinase	2.7.2.3	ko00010 Glycolysis / Gluconeogenesis ko00710 Carbon fixation in photosynthetic organisms ko01100 Metabolic pathways ko01110 Biosynthesis of secondary metabolites ko01200 Carbon metabolism ko01230 Biosynthesis of amino acids	3-phosphoglycerate kinase	G	Carbohydrate transport and metabolism ;
TRINITY_DN193278_c0_g2	HSP7M_PHAVU, RecName: Full=Heat shock 70 kDa protein, mitochondrial Flags: Precursor	-	2765.8	2981.7	2741.9	2837.2	3028.7	2577.4	1.00546	0.925145	0.00785562	Nonsignificant	None	--	--	molecular chaperone DnaK	--	ko03018 RNA degradation	Molecular chaperone DnaK (HSP70)	O	Posttranslational modification, protein turnover, chaperones ;
TRINITY_DN193992_c1_g9	AMPL2_ORYSJ, RecName: Full=Leucine aminopeptidase 2, chloroplastic EC=3.4.11.1 AltName: Full=Leucyl aminopeptidase 2 Short=LAP 2 AltName: Full=Proline aminopeptidase 2 EC=3.4.11.5 AltName: Full=Prolyl aminopeptidase 2 Flags: Precursor	-	2786.7	2820.2	2789.9	2757.2	2573.7	2565.8	1.06333	0.112675	0.0885897	Nonsignificant	None	7	Molecular Function:aminopeptidase activity (GO:0004177),Cellular Component:intracellular (GO:0005622),Cellular Component:cytoplasm (GO:0005737),Biological Process:proteolysis (GO:0006508),Molecular Function:metalloexopeptidase activity (GO:0008235),Biological Process:protein metabolic process (GO:0019538),Molecular Function:manganese ion binding (GO:0030145)	--	--	--	Leucyl aminopeptidase	E	Amino acid transport and metabolism ;
TRINITY_DN201435_c4_g2	CYSKP_SOLTU, RecName: Full=Cysteine synthase, chloroplastic/chromoplastic EC=2.5.1.47 AltName: Full=CSase B Short=CS-B AltName: Full=O-acetylserine (thiol)-lyase AltName: Full=O-acetylserine sulfhydrylase AltName: Full=OAS-TL B Flags: Precursor	-	2827.6	2967.6	2840	2922.3	3252.2	3230.9	0.918111	0.123429	-0.12326	Nonsignificant	None	--	--	cysteine synthase A	2.5.1.47	ko00270 Cysteine and methionine metabolism ko00920 Sulfur metabolism ko01100 Metabolic pathways ko01110 Biosynthesis of secondary metabolites ko01200 Carbon metabolism ko01230 Biosynthesis of amino acids	Cysteine synthase	E	Amino acid transport and metabolism ;
TRINITY_DN197567_c0_g1	ENO2_MAIZE, RecName: Full=Enolase 2 EC=4.2.1.11 AltName: Full=2-phospho-D-glycerate hydro-lyase 2 AltName: Full=2-phosphoglycerate dehydratase 2	-	2476.4	2663.4	2476	2531	2337.9	2341.5	1.05622	0.204493	0.0789163	Nonsignificant	None	4	Cellular Component:phosphopyruvate hydratase complex (GO:0000015),Molecular Function:magnesium ion binding (GO:0000287),Molecular Function:phosphopyruvate hydratase activity (GO:0004634),Biological Process:glycolytic process (GO:0006096)	enolase	4.2.1.11	ko00010 Glycolysis / Gluconeogenesis ko01100 Metabolic pathways ko01110 Biosynthesis of secondary metabolites ko01200 Carbon metabolism ko01230 Biosynthesis of amino acids ko03018 RNA degradation	Enolase	G	Carbohydrate transport and metabolism ;
TRINITY_DN195588_c0_g2	AAT5_ARATH, RecName: Full=Aspartate aminotransferase, chloroplastic EC=2.6.1.1 AltName: Full=Transaminase A Flags: Precursor	-	3302.4	3436.9	3181.7	3605.6	3658.3	3205.2	0.947646	0.338963	-0.07758	Nonsignificant	None	4	Biological Process:cellular amino acid metabolic process (GO:0006520),Molecular Function:transaminase activity (GO:0008483),Biological Process:biosynthetic process (GO:0009058),Molecular Function:pyridoxal phosphate binding (GO:0030170)	aspartate aminotransferase, chloroplastic	2.6.1.1	ko00220 Arginine biosynthesis ko00250 Alanine, aspartate and glutamate metabolism ko00270 Cysteine and methionine metabolism ko00330 Arginine and proline metabolism ko00350 Tyrosine metabolism ko00360 Phenylalanine metabolism ko00400 Phenylalanine, tyrosine and tryptophan biosynthesis ko00950 Isoquinoline alkaloid biosynthesis ko00960 Tropane, piperidine and pyridine alkaloid biosynthesis ko01100…	Aspartate/tyrosine/aromatic aminotransferase	E	Amino acid transport and metabolism ;
TRINITY_DN200473_c2_g1	SECA1_ARATH, RecName: Full=Protein translocase subunit SECA1, chloroplastic Short=AtcpSecA AltName: Full=Protein ALBINO OR GLASSY YELLOW 1 Flags: Precursor	-	2784.7	2739.7	2691.7	2703.1	2780.8	2800.1	0.991803	0.601999	-0.0118738	Nonsignificant	None	5	Molecular Function:ATP binding (GO:0005524),Biological Process:protein targeting (GO:0006605),Biological Process:intracellular protein transport (GO:0006886),Cellular Component:membrane (GO:0016020),Biological Process:protein import (GO:0017038)	preprotein translocase subunit SecA	--	ko03060 Protein export	Preprotein translocase subunit SecA (ATPase, RNA helicase)	U	Intracellular trafficking, secretion, and vesicular transport ;
TRINITY_DN198154_c1_g1	PDI_WHEAT, RecName: Full=Protein disulfide-isomerase Short=PDI EC=5.3.4.1 Flags: Precursor	-	3700.7	3281.1	3729.6	3622.7	3201.6	3146.6	1.07427	0.302786	0.103351	Nonsignificant	None	1	Biological Process:cell redox homeostasis (GO:0045454)	protein disulfide-isomerase A1	5.3.4.1	ko04141 Protein processing in endoplasmic reticulum	Negative regulator of GroEL, contains thioredoxin-like and TPR-like domains	O	Posttranslational modification, protein turnover, chaperones ;
TRINITY_DN195138_c0_g2	PHSL_IPOBA, RecName: Full=Alpha-1,4 glucan phosphorylase L isozyme, chloroplastic/amyloplastic EC=2.4.1.1 AltName: Full=Starch phosphorylase L Flags: Precursor	-	2257.4	2377.5	2252.2	2514.7	2452.3	2293	0.948636	0.198551	-0.0760729	Nonsignificant	None	2	Biological Process:carbohydrate metabolic process (GO:0005975),Molecular Function:glycogen phosphorylase activity (GO:0008184)	glycogen phosphorylase	2.4.1.1	ko00500 Starch and sucrose metabolism ko01100 Metabolic pathways ko01110 Biosynthesis of secondary metabolites	Glucan phosphorylase	G	Carbohydrate transport and metabolism ;
TRINITY_DN198689_c1_g1	TI110_ARATH, RecName: Full=Protein TIC110, chloroplastic AltName: Full=Translocon at the inner envelope membrane of chloroplasts 110 Short=AtTIC110 Flags: Precursor	-	345.6	304.4	333	338.1	353.6	319.3	0.972305	0.585736	-0.0405197	Nonsignificant	None	1	Cellular Component:chloroplast (GO:0009507)	--	--	--	--	--	--
TRINITY_DN175413_c0_g5	ACT3_ORYSJ, RecName: Full=Actin-3	-	5455.7	5021.7	5102.7	5380.1	4850.2	5374.1	0.998443	0.972573	-0.00224839	Nonsignificant	None	--	--	actin, other eukaryote	--	--	Actin-related protein	Z	Cytoskeleton ;
TRINITY_DN186016_c3_g4	ACT2_ORYSJ, RecName: Full=Actin-2	-	510	449	476.9	482.5	539.5	493.9	0.947226	0.342462	-0.0782193	Nonsignificant	None	--	--	actin, other eukaryote	--	--	Actin-related protein	Z	Cytoskeleton ;
TRINITY_DN201789_c2_g1	METE1_ORYSJ, RecName: Full=5-methyltetrahydropteroyltriglutamate--homocysteine methyltransferase 1 EC=2.1.1.14 AltName: Full=Cobalamin-independent methionine synthase 1	-	1578.1	1351.7	1421.3	1366.7	1617.1	1688.1	0.931334	0.423092	-0.102629	Nonsignificant	None	3	Molecular Function:5-methyltetrahydropteroyltriglutamate-homocysteine S-methyltransferase activity (GO:0003871),Molecular Function:zinc ion binding (GO:0008270),Biological Process:methionine biosynthetic process (GO:0009086)	5-methyltetrahydropteroyltriglutamate--homocysteine methyltransferase	2.1.1.14	ko00270 Cysteine and methionine metabolism ko00450 Selenocompound metabolism ko01100 Metabolic pathways ko01110 Biosynthesis of secondary metabolites ko01230 Biosynthesis of amino acids	Methionine synthase II (cobalamin-independent)	E	Amino acid transport and metabolism ;
TRINITY_DN174240_c0_g2	HSP7S_PEA, RecName: Full=Stromal 70 kDa heat shock-related protein, chloroplastic Flags: Precursor	-	168.2	172.2	164.6	212.9	171.1	189.2	0.881019	0.197953	-0.182755	Nonsignificant	None	--	--	heat shock 70kDa protein 1/2/6/8	--	ko03040 Spliceosome ko04141 Protein processing in endoplasmic reticulum ko04144 Endocytosis	Molecular chaperone DnaK (HSP70)	O	Posttranslational modification, protein turnover, chaperones ;
TRINITY_DN200284_c2_g3	TPPII_ORYSJ, RecName: Full=Tripeptidyl-peptidase 2 EC=3.4.14.10 AltName: Full=Tripeptidyl-peptidase II Short=TPPII	-	2664.9	2493.2	2968.9	2684.9	2742.4	2509.1	1.02402	0.71113	0.0342382	Nonsignificant	None	2	Molecular Function:serine-type endopeptidase activity (GO:0004252),Biological Process:proteolysis (GO:0006508)	tripeptidyl-peptidase II	3.4.14.10	--	Serine protease, subtilisin family	O	Posttranslational modification, protein turnover, chaperones ;
TRINITY_DN200128_c1_g1	CARB_ORYSJ, RecName: Full=Carbamoyl-phosphate synthase large chain, chloroplastic EC=6.3.5.5 AltName: Full=Carbamoyl-phosphate synthetase ammonia chain Flags: Precursor	-	3237.2	3251	3233.1	3103	3378.8	3189.2	1.0052	0.856139	0.00748418	Nonsignificant	None	3	Molecular Function:ATP binding (GO:0005524),Biological Process:nitrogen compound metabolic process (GO:0006807),Molecular Function:metal ion binding (GO:0046872)	carbamoyl-phosphate synthase large subunit	6.3.5.5	ko00240 Pyrimidine metabolism ko00250 Alanine, aspartate and glutamate metabolism ko01100 Metabolic pathways	Carbamoylphosphate synthase large subunit	EF	Amino acid transport and metabolism ; Nucleotide transport and metabolism ;
TRINITY_DN196544_c2_g2	ASO_CUCPM, RecName: Full=L-ascorbate oxidase Short=ASO Short=Ascorbase EC=1.10.3.3	-	2694.2	2325.5	2663	2235	3098.6	1877.8	1.06535	0.713907	0.0913341	Nonsignificant	None	3	Molecular Function:copper ion binding (GO:0005507),Molecular Function:oxidoreductase activity (GO:0016491),Biological Process:oxidation-reduction process (GO:0055114)	L-ascorbate oxidase	1.10.3.3	ko00053 Ascorbate and aldarate metabolism ko01100 Metabolic pathways	Multicopper oxidase with three cupredoxin domains (includes cell division protein FtsP and spore coat protein CotA)	DPM	Cell cycle control, cell division, chromosome partitioning ; Inorganic ion transport and metabolism ; Cell wall/membrane/envelope biogenesis ;
TRINITY_DN178910_c0_g1	VATB2_HORVU, RecName: Full=V-type proton ATPase subunit B 2 Short=V-ATPase subunit B 2 AltName: Full=Vacuolar proton pump subunit B 2	-	2657.8	2665.2	2694.7	2769.7	2855.2	2796.6	0.952051	0.0199136	-0.0708888	Nonsignificant	None	3	Molecular Function:ATP binding (GO:0005524),Biological Process:proton transport (GO:0015992),Biological Process:ATP metabolic process (GO:0046034)	V-type H+-transporting ATPase subunit B	--	ko00190 Oxidative phosphorylation ko01100 Metabolic pathways ko04145 Phagosome	Archaeal/vacuolar-type H+-ATPase subunit B/Vma2	C	Energy production and conversion ;
TRINITY_DN201710_c1_g3	GCST_SOLTU, RecName: Full=Aminomethyltransferase, mitochondrial EC=2.1.2.10 AltName: Full=Glycine cleavage system T protein Short=GCVT Flags: Precursor	-	3593.5	4005.6	3794.8	3513	3281	4135.6	1.04248	0.622878	0.060021	Nonsignificant	None	--	--	aminomethyltransferase	2.1.2.10	ko00260 Glycine, serine and threonine metabolism ko00630 Glyoxylate and dicarboxylate metabolism ko00670 One carbon pool by folate ko01100 Metabolic pathways ko01110 Biosynthesis of secondary metabolites ko01200 Carbon metabolism	Glycine cleavage system T protein (aminomethyltransferase)	E	Amino acid transport and metabolism ;
TRINITY_DN189301_c3_g1	CAHC_HORVU, RecName: Full=Carbonic anhydrase, chloroplastic EC=4.2.1.1 AltName: Full=Carbonate dehydratase Flags: Precursor	-	8439.7	8888.2	8052.1	7548.7	7962	10077.4	0.991867	0.939152	-0.011781	Nonsignificant	None	2	Molecular Function:carbonate dehydratase activity (GO:0004089),Molecular Function:zinc ion binding (GO:0008270)	carbonic anhydrase	4.2.1.1	ko00910 Nitrogen metabolism	Carbonic anhydrase	P	Inorganic ion transport and metabolism ;
TRINITY_DN171996_c1_g2	ATPBM_ORYSJ, RecName: Full=ATP synthase subunit beta, mitochondrial EC=3.6.3.14 Flags: Precursor	-	3504.9	3368.2	3442.9	3359.6	3402.9	3247.2	1.0306	0.171006	0.0434849	Nonsignificant	None	3	Molecular Function:ATP binding (GO:0005524),Biological Process:proton transport (GO:0015992),Biological Process:ATP metabolic process (GO:0046034)	F-type H+-transporting ATPase subunit beta	3.6.3.14	ko00190 Oxidative phosphorylation ko01100 Metabolic pathways	FoF1-type ATP synthase, beta subunit	C	Energy production and conversion ;
TRINITY_DN197162_c1_g2	HS905_ARATH, RecName: Full=Heat shock protein 90-5, chloroplastic {ECO:0000305} Short=AtHSP90.5 {ECO:0000305} Short=AtHsp90-5 {ECO:0000303|PubMed:11599565} AltName: Full=Heat shock protein 88-1 {ECO:0000305} Short=Hsp88-1 {ECO:0000303|PubMed:11599565} AltName: Full=Hsp90C {ECO:0000303|PubMed:23382192} AltName: Full=Protein EMBRYO DEFECTIVE 1956 {ECO:0000303|PubMed:23382192} AltName: Full=Protein …	-	2737.7	2745.3	2722	2788.3	2671.9	2711.9	1.00403	0.780677	0.00579648	Nonsignificant	None	4	Molecular Function:ATP binding (GO:0005524),Biological Process:protein folding (GO:0006457),Biological Process:response to stress (GO:0006950),Molecular Function:unfolded protein binding (GO:0051082)	heat shock protein 90kDa beta	--	ko04141 Protein processing in endoplasmic reticulum ko04626 Plant-pathogen interaction	Molecular chaperone, HSP90 family	O	Posttranslational modification, protein turnover, chaperones ;
TRINITY_DN188683_c0_g2	ACOC_ORYSJ, RecName: Full=Putative aconitate hydratase, cytoplasmic Short=Aconitase EC=4.2.1.3 AltName: Full=Citrate hydro-lyase	-	2122.4	2289.8	2286.9	2167.5	2247.2	2041.4	1.03764	0.377121	0.0533044	Nonsignificant	None	1	Biological Process:metabolic process (GO:0008152)	aconitate hydratase	4.2.1.3	ko00020 Citrate cycle (TCA cycle) ko00630 Glyoxylate and dicarboxylate metabolism ko01100 Metabolic pathways ko01110 Biosynthesis of secondary metabolites ko01200 Carbon metabolism ko01210 2-Oxocarboxylic acid metabolism ko01230 Biosynthesis of amino acids	Aconitase A	C	Energy production and conversion ;
TRINITY_DN198819_c0_g1	P2SAF_ORYSJ, RecName: Full=Photosystem II stability/assembly factor HCF136, chloroplastic Flags: Precursor	-	2992.5	3122.3	2987.5	3105.7	3103.6	3564	0.931344	0.278873	-0.102615	Nonsignificant	None	--	--	--	--	--	Uncharacterized protein related to plant photosystem II stability/assembly factor	R	General function prediction only ;
TRINITY_DN199480_c1_g2	SUS1_HORVU, RecName: Full=Sucrose synthase 1 EC=2.4.1.13 AltName: Full=Sucrose-UDP glucosyltransferase 1	-	2621.1	2261.2	2586.7	2224.4	2435.6	2477.6	1.04643	0.476348	0.065476	Nonsignificant	None	2	Biological Process:sucrose metabolic process (GO:0005985),Molecular Function:sucrose synthase activity (GO:0016157)	sucrose synthase	2.4.1.13	ko00500 Starch and sucrose metabolism ko01100 Metabolic pathways	Glycosyltransferase involved in cell wall bisynthesis	M	Cell wall/membrane/envelope biogenesis ;
TRINITY_DN192534_c0_g1	ACO3M_ARATH, RecName: Full=Aconitate hydratase 3, mitochondrial {ECO:0000303|PubMed:25061985} Short=Aconitase 3 {ECO:0000303|PubMed:25061985} Short=mACO1 {ECO:0000303|PubMed:24296071} EC=4.2.1.3 {ECO:0000250|UniProtKB:P19414} AltName: Full=Citrate hydro-lyase 3 {ECO:0000303|PubMed:25061985} Flags: Precursor	-	403.2	391.1	422.3	388.1	393.2	388.9	1.03965	0.228248	0.0560998	Nonsignificant	None	1	Biological Process:metabolic process (GO:0008152)	aconitate hydratase	4.2.1.3	ko00020 Citrate cycle (TCA cycle) ko00630 Glyoxylate and dicarboxylate metabolism ko01100 Metabolic pathways ko01110 Biosynthesis of secondary metabolites ko01200 Carbon metabolism ko01210 2-Oxocarboxylic acid metabolism ko01230 Biosynthesis of amino acids	Aconitase A	C	Energy production and conversion ;
TRINITY_DN197527_c2_g1	GSA_ORYSJ, RecName: Full=Glutamate-1-semialdehyde 2,1-aminomutase, chloroplastic Short=GSA EC=5.4.3.8 AltName: Full=Glutamate-1-semialdehyde aminotransferase Short=GSA-AT Flags: Precursor	-	2441.8	2475.1	2365.6	2544.8	2656.8	2946.3	0.893789	0.129158	-0.161994	Nonsignificant	None	2	Molecular Function:transaminase activity (GO:0008483),Molecular Function:pyridoxal phosphate binding (GO:0030170)	glutamate-1-semialdehyde 2,1-aminomutase	5.4.3.8	ko00860 Porphyrin and chlorophyll metabolism ko01100 Metabolic pathways ko01110 Biosynthesis of secondary metabolites	Glutamate-1-semialdehyde aminotransferase	H	Coenzyme transport and metabolism ;
TRINITY_DN200356_c3_g2	RH3A_MAIZE, RecName: Full=DEAD-box ATP-dependent RNA helicase 3A, chloroplastic {ECO:0000305} Short=ZmRH3A {ECO:0000305} EC=3.6.4.13 {ECO:0000305} Flags: Precursor	-	2761.5	2748.2	2746.6	2881	3121.2	2979	0.919287	0.073479	-0.121413	Nonsignificant	None	5	Molecular Function:nucleic acid binding (GO:0003676),Molecular Function:RNA binding (GO:0003723),Molecular Function:helicase activity (GO:0004386),Molecular Function:ATP binding (GO:0005524),Cellular Component:nucleus (GO:0005634)	--	--	--	Superfamily II DNA and RNA helicase	L	Replication, recombination and repair ;
TRINITY_DN172788_c3_g1	GLTB_ORYSJ, RecName: Full=Ferredoxin-dependent glutamate synthase, chloroplastic EC=1.4.7.1 AltName: Full=Fd-GOGAT Flags: Precursor	-	810.4	929.2	881	901.9	880.9	988	0.945792	0.352171	-0.0804054	Nonsignificant	None	6	Biological Process:glutamate biosynthetic process (GO:0006537),Biological Process:nitrogen compound metabolic process (GO:0006807),Biological Process:metabolic process (GO:0008152),Molecular Function:glutamate synthase activity (GO:0015930),Molecular Function:oxidoreductase activity (GO:0016491),Biological Process:oxidation-reduction process (GO:0055114)	glutamate synthase (ferredoxin)	1.4.7.1	ko00630 Glyoxylate and dicarboxylate metabolism ko00910 Nitrogen metabolism	Glutamate synthase domain 3	E	Amino acid transport and metabolism ;
TRINITY_DN192705_c0_g2	CLPC2_ORYSJ, RecName: Full=Chaperone protein ClpC2, chloroplastic AltName: Full=ATP-dependent Clp protease ATP-binding subunit ClpC homolog 2 AltName: Full=Casein lytic proteinase C2 Flags: Precursor	-	326.3	349.6	356	357.7	315.5	344.9	1.01355	0.781581	0.0194239	Nonsignificant	None	1	Molecular Function:ATP binding (GO:0005524)	ATP-dependent Clp protease ATP-binding subunit ClpC	--	ko01100 Metabolic pathways	ATP-dependent Clp protease ATP-binding subunit ClpA	O	Posttranslational modification, protein turnover, chaperones ;
TRINITY_DN197140_c1_g1	MPPB_ARATH, RecName: Full=Probable mitochondrial-processing peptidase subunit beta, mitochondrial EC=3.4.24.64 AltName: Full=Beta-MPP Flags: Precursor	-	2177.9	2205.2	2354	2270.5	2202.9	2182.1	1.01226	0.68628	0.0175807	Nonsignificant	None	--	--	mitochondrial-processing peptidase subunit beta	3.4.24.64	--	Predicted Zn-dependent peptidase	R	General function prediction only ;
TRINITY_DN191969_c0_g2	HSP7S_PEA, RecName: Full=Stromal 70 kDa heat shock-related protein, chloroplastic Flags: Precursor	-	1386.1	1517.9	1439.1	1559	1240.1	1459	1.01996	0.800808	0.0285153	Nonsignificant	None	--	--	heat shock 70kDa protein 1/2/6/8	--	ko03040 Spliceosome ko04141 Protein processing in endoplasmic reticulum ko04144 Endocytosis	Molecular chaperone DnaK (HSP70)	O	Posttranslational modification, protein turnover, chaperones ;
TRINITY_DN191092_c0_g1	PMGI_MAIZE, RecName: Full=2,3-bisphosphoglycerate-independent phosphoglycerate mutase Short=BPG-independent PGAM Short=Phosphoglyceromutase EC=5.4.2.12 AltName: Full=PGAM-I	-	3149.5	3097.7	3382	3110	3015.4	3291.7	1.02252	0.585263	0.0321331	Nonsignificant	None	6	Molecular Function:catalytic activity (GO:0003824),Molecular Function:phosphoglycerate mutase activity (GO:0004619),Cellular Component:cytoplasm (GO:0005737),Biological Process:glucose catabolic process (GO:0006007),Molecular Function:manganese ion binding (GO:0030145),Molecular Function:metal ion binding (GO:0046872)	2,3-bisphosphoglycerate-independent phosphoglycerate mutase	5.4.2.12	ko00010 Glycolysis / Gluconeogenesis ko00260 Glycine, serine and threonine metabolism ko01100 Metabolic pathways ko01110 Biosynthesis of secondary metabolites ko01200 Carbon metabolism ko01230 Biosynthesis of amino acids	Phosphoglycerate mutase (BPG-independent, AlkP superfamily)	G	Carbohydrate transport and metabolism ;
TRINITY_DN199660_c1_g3	GSA_ORYSJ, RecName: Full=Glutamate-1-semialdehyde 2,1-aminomutase, chloroplastic Short=GSA EC=5.4.3.8 AltName: Full=Glutamate-1-semialdehyde aminotransferase Short=GSA-AT Flags: Precursor	-	724.7	770.2	706.6	782.1	804.6	879	0.89285	0.0753955	-0.16351	Nonsignificant	None	2	Molecular Function:transaminase activity (GO:0008483),Molecular Function:pyridoxal phosphate binding (GO:0030170)	glutamate-1-semialdehyde 2,1-aminomutase	5.4.3.8	ko00860 Porphyrin and chlorophyll metabolism ko01100 Metabolic pathways ko01110 Biosynthesis of secondary metabolites	Glutamate-1-semialdehyde aminotransferase	H	Coenzyme transport and metabolism ;
TRINITY_DN192051_c0_g1	CAPP1_SORBI, RecName: Full=Phosphoenolpyruvate carboxylase 1 Short=PEPC 1 Short=PEPCase 1 EC=4.1.1.31 AltName: Full=CP21	-	1813.5	1838.9	1882.4	1730.9	1785.5	1600.6	1.08165	0.113358	0.113233	Nonsignificant	None	3	Biological Process:tricarboxylic acid cycle (GO:0006099),Molecular Function:phosphoenolpyruvate carboxylase activity (GO:0008964),Biological Process:carbon fixation (GO:0015977)	phosphoenolpyruvate carboxylase	4.1.1.31	ko00620 Pyruvate metabolism ko00710 Carbon fixation in photosynthetic organisms ko01100 Metabolic pathways ko01200 Carbon metabolism	Phosphoenolpyruvate carboxylase	C	Energy production and conversion ;
TRINITY_DN176732_c3_g1	HSP7C_PETHY, RecName: Full=Heat shock cognate 70 kDa protein	-	2374.9	2256.7	2151.1	2605	2358.5	2042.8	0.968086	0.702858	-0.0467931	Nonsignificant	None	--	--	heat shock 70kDa protein 1/2/6/8	--	ko03040 Spliceosome ko04141 Protein processing in endoplasmic reticulum ko04144 Endocytosis	Molecular chaperone DnaK (HSP70)	O	Posttranslational modification, protein turnover, chaperones ;
TRINITY_DN200047_c1_g1	P2SAF_ORYSJ, RecName: Full=Photosystem II stability/assembly factor HCF136, chloroplastic Flags: Precursor	-	59	64.1	65.8	59.9	68.6	75.6	0.925527	0.389199	-0.111653	Nonsignificant	None	--	--	--	--	--	Uncharacterized protein related to plant photosystem II stability/assembly factor	R	General function prediction only ;
TRINITY_DN198709_c4_g1	MPPB_ARATH, RecName: Full=Probable mitochondrial-processing peptidase subunit beta, mitochondrial EC=3.4.24.64 AltName: Full=Beta-MPP Flags: Precursor	-	36.7	38.7	40.7	42.5	35.5	38.6	0.995712	0.947271	-0.00619982	Nonsignificant	None	--	--	mitochondrial-processing peptidase subunit beta	3.4.24.64	--	Predicted Zn-dependent peptidase	R	General function prediction only ;
TRINITY_DN198503_c0_g1	CARB_ORYSJ, RecName: Full=Carbamoyl-phosphate synthase large chain, chloroplastic EC=6.3.5.5 AltName: Full=Carbamoyl-phosphate synthetase ammonia chain Flags: Precursor	-	115.5	105.1	109.8	106.3	109.7	105.5	1.02768	0.437718	0.0393949	Nonsignificant	None	3	Molecular Function:ATP binding (GO:0005524),Biological Process:nitrogen compound metabolic process (GO:0006807),Molecular Function:metal ion binding (GO:0046872)	carbamoyl-phosphate synthase large subunit	6.3.5.5	ko00240 Pyrimidine metabolism ko00250 Alanine, aspartate and glutamate metabolism ko01100 Metabolic pathways	Carbamoylphosphate synthase large subunit	EF	Amino acid transport and metabolism ; Nucleotide transport and metabolism ;
TRINITY_DN191664_c0_g1	TCPB_ARATH, RecName: Full=T-complex protein 1 subunit beta {ECO:0000303|PubMed:11599560} Short=TCP-1-beta {ECO:0000303|PubMed:11599560} AltName: Full=CCT-beta {ECO:0000303|PubMed:11599560} AltName: Full=Chaperonin CCT2 {ECO:0000305}	-	1782.8	1698.8	1677.7	1695.2	1845.6	1643.2	0.995235	0.912033	-0.00689038	Nonsignificant	None	3	Molecular Function:ATP binding (GO:0005524),Biological Process:protein folding (GO:0006457),Molecular Function:unfolded protein binding (GO:0051082)	T-complex protein 1 subunit beta	--	--	Chaperonin GroEL (HSP60 family)	O	Posttranslational modification, protein turnover, chaperones ;
TRINITY_DN197295_c0_g1	PSBC_HORVU, RecName: Full=Photosystem II CP43 reaction center protein {ECO:0000255|HAMAP-Rule:MF_01496} AltName: Full=PSII 43 kDa protein {ECO:0000255|HAMAP-Rule:MF_01496} AltName: Full=Protein CP-43 {ECO:0000255|HAMAP-Rule:MF_01496} AltName: Full=Protein P6 {ECO:0000303|PubMed:3290856} Flags: Precursor	-	5199.2	5296.3	5216.6	5182	5563.4	5186.3	0.986216	0.624799	-0.0200242	Nonsignificant	None	4	Cellular Component:photosystem (GO:0009521),Biological Process:photosynthetic electron transport chain (GO:0009767),Cellular Component:membrane (GO:0016020),Molecular Function:chlorophyll binding (GO:0016168)	photosystem II CP43 chlorophyll apoprotein	--	ko00195 Photosynthesis ko01100 Metabolic pathways	--	--	--
TRINITY_DN201916_c3_g1	CLH1_ORYSJ, RecName: Full=Clathrin heavy chain 1	-	781.8	727.2	766.6	751.2	763.3	720.7	1.01807	0.551403	0.0258431	Nonsignificant	None	5	Molecular Function:structural molecule activity (GO:0005198),Biological Process:intracellular protein transport (GO:0006886),Biological Process:vesicle-mediated transport (GO:0016192),Cellular Component:clathrin coat of trans-Golgi network vesicle (GO:0030130),Cellular Component:clathrin coat of coated pit (GO:0030132)	clathrin heavy chain	--	ko04144 Endocytosis	--	--	--
TRINITY_DN164657_c0_g2	RUBB_PEA, RecName: Full=RuBisCO large subunit-binding protein subunit beta, chloroplastic AltName: Full=60 kDa chaperonin subunit beta AltName: Full=CPN-60 beta Flags: Precursor	-	51.7	45.7	60.3	180	71.6	53.8	0.516372	0.337918	-0.953517	Nonsignificant	None	3	Molecular Function:ATP binding (GO:0005524),Cellular Component:cytoplasm (GO:0005737),Biological Process:protein refolding (GO:0042026)	chaperonin GroEL	--	ko03018 RNA degradation	Chaperonin GroEL (HSP60 family)	O	Posttranslational modification, protein turnover, chaperones ;
TRINITY_DN198683_c2_g2	CYSKP_SOLTU, RecName: Full=Cysteine synthase, chloroplastic/chromoplastic EC=2.5.1.47 AltName: Full=CSase B Short=CS-B AltName: Full=O-acetylserine (thiol)-lyase AltName: Full=O-acetylserine sulfhydrylase AltName: Full=OAS-TL B Flags: Precursor	-	271.3	260.9	252.5	238.2	251.2	258.8	1.04878	0.208555	0.0687172	Nonsignificant	None	--	--	cysteine synthase A	2.5.1.47	ko00270 Cysteine and methionine metabolism ko00920 Sulfur metabolism ko01100 Metabolic pathways ko01110 Biosynthesis of secondary metabolites ko01200 Carbon metabolism ko01230 Biosynthesis of amino acids	Cysteine synthase	E	Amino acid transport and metabolism ;
TRINITY_DN199426_c0_g1	SYGM1_ARATH, RecName: Full=Glycine--tRNA ligase, mitochondrial 1 {ECO:0000305} EC=6.1.1.14 {ECO:0000269|PubMed:11278923} AltName: Full=Diadenosine tetraphosphate synthetase {ECO:0000305} Short=AP-4-A synthetase {ECO:0000305} AltName: Full=Glycyl-tRNA synthetase 1 {ECO:0000303|PubMed:11278923} Short=GlyRS-1 {ECO:0000303|PubMed:11278923} Flags: Precursor	-	22.2	28.9	29.6	31.2	24.1	30.7	0.938372	0.619371	-0.091768	Nonsignificant	None	7	Molecular Function:nucleotide binding (GO:0000166),Molecular Function:aminoacyl-tRNA ligase activity (GO:0004812),Molecular Function:glycine-tRNA ligase activity (GO:0004820),Molecular Function:ATP binding (GO:0005524),Cellular Component:cytoplasm (GO:0005737),Biological Process:tRNA aminoacylation for protein translation (GO:0006418),Biological Process:glycyl-tRNA aminoacylation (GO:0006426)	glycyl-tRNA synthetase	6.1.1.14	ko00970 Aminoacyl-tRNA biosynthesis	Glycyl-tRNA synthetase (class II)	J	Translation, ribosomal structure and biogenesis ;
TRINITY_DN197019_c1_g2	SYGM1_ARATH, RecName: Full=Glycine--tRNA ligase, mitochondrial 1 {ECO:0000305} EC=6.1.1.14 {ECO:0000269|PubMed:11278923} AltName: Full=Diadenosine tetraphosphate synthetase {ECO:0000305} Short=AP-4-A synthetase {ECO:0000305} AltName: Full=Glycyl-tRNA synthetase 1 {ECO:0000303|PubMed:11278923} Short=GlyRS-1 {ECO:0000303|PubMed:11278923} Flags: Precursor	-	2636.6	2539	2550.4	2456	2464.6	2543.4	1.0351	0.10389	0.0497727	Nonsignificant	None	7	Molecular Function:nucleotide binding (GO:0000166),Molecular Function:aminoacyl-tRNA ligase activity (GO:0004812),Molecular Function:glycine-tRNA ligase activity (GO:0004820),Molecular Function:ATP binding (GO:0005524),Cellular Component:cytoplasm (GO:0005737),Biological Process:tRNA aminoacylation for protein translation (GO:0006418),Biological Process:glycyl-tRNA aminoacylation (GO:0006426)	glycyl-tRNA synthetase	6.1.1.14	ko00970 Aminoacyl-tRNA biosynthesis	Glycyl-tRNA synthetase (class II)	J	Translation, ribosomal structure and biogenesis ;
TRINITY_DN201799_c5_g1	ALFP_ORYSJ, RecName: Full=Fructose-bisphosphate aldolase, chloroplastic {ECO:0000305} EC=4.1.2.13 {ECO:0000305} AltName: Full=Chloroplastic aldolase {ECO:0000303|PubMed:8163192} Short=AldP {ECO:0000303|PubMed:8163192} Flags: Precursor	-	3776.3	4199.1	3965.9	3941.5	3653	4248.5	1.0083	0.884865	0.0119253	Nonsignificant	None	2	Molecular Function:fructose-bisphosphate aldolase activity (GO:0004332),Biological Process:glycolytic process (GO:0006096)	fructose-bisphosphate aldolase, class I	4.1.2.13	ko00010 Glycolysis / Gluconeogenesis ko00030 Pentose phosphate pathway ko00051 Fructose and mannose metabolism ko00710 Carbon fixation in photosynthetic organisms ko01100 Metabolic pathways ko01110 Biosynthesis of secondary metabolites ko01200 Carbon metabolism ko01230 Biosynthesis of amino acids	Fructose-bisphosphate aldolase class 1	G	Carbohydrate transport and metabolism ;
TRINITY_DN194824_c1_g1	CH20_ARATH, RecName: Full=20 kDa chaperonin, chloroplastic AltName: Full=Chaperonin 10 Short=Ch-CPN10 Short=Cpn10 AltName: Full=Chaperonin 20 AltName: Full=Protein Cpn21 Flags: Precursor	-	2197.2	2221.7	2116.8	2310.5	2513.4	2471.2	0.895903	0.0359691	-0.158586	Nonsignificant	None	4	Cellular Component:cytoplasm (GO:0005737),Biological Process:protein folding (GO:0006457),Molecular Function:transition metal ion binding (GO:0046914),Biological Process:positive regulation of superoxide dismutase activity (GO:1901671)	chaperonin GroES	--	--	Co-chaperonin GroES (HSP10)	O	Posttranslational modification, protein turnover, chaperones ;
TRINITY_DN178484_c3_g1	G3PA_SPIOL, RecName: Full=Glyceraldehyde-3-phosphate dehydrogenase A, chloroplastic EC=1.2.1.13 AltName: Full=NADP-dependent glyceraldehydephosphate dehydrogenase subunit A Flags: Precursor	-	4244.5	4995.7	4540.2	4868.2	4622.2	4904.9	0.957285	0.456476	-0.0629801	Nonsignificant	None	1	Biological Process:oxidation-reduction process (GO:0055114)	glyceraldehyde-3-phosphate dehydrogenase (NADP+) (phosphorylating)	1.2.1.13	ko00710 Carbon fixation in photosynthetic organisms ko01100 Metabolic pathways ko01200 Carbon metabolism	Glyceraldehyde-3-phosphate dehydrogenase/erythrose-4-phosphate dehydrogenase	G	Carbohydrate transport and metabolism ;
TRINITY_DN194542_c0_g2	OOPDA_ARATH, RecName: Full=Organellar oligopeptidase A, chloroplastic/mitochondrial EC=3.4.24.70 AltName: Full=Thimet metalloendopeptidase 1 AltName: Full=Zincin-like metalloproteases family protein 1 Flags: Precursor	-	2569.9	2439.9	2505.4	2523.9	2559.3	2497.9	0.991307	0.635209	-0.0125957	Nonsignificant	None	2	Molecular Function:metalloendopeptidase activity (GO:0004222),Biological Process:proteolysis (GO:0006508)	oligopeptidase A	3.4.24.70	--	Zn-dependent oligopeptidase	E	Amino acid transport and metabolism ;
TRINITY_DN201392_c5_g4	HSP7C_PETHY, RecName: Full=Heat shock cognate 70 kDa protein	-	369.7	339.1	263.2	416.1	308.1	238.7	1.00945	0.962911	0.0135703	Nonsignificant	None	--	--	heat shock 70kDa protein 1/2/6/8	--	ko03040 Spliceosome ko04141 Protein processing in endoplasmic reticulum ko04144 Endocytosis	Molecular chaperone DnaK (HSP70)	O	Posttranslational modification, protein turnover, chaperones ;
TRINITY_DN174871_c1_g4	CLPC1_ORYSJ, RecName: Full=Chaperone protein ClpC1, chloroplastic AltName: Full=ATP-dependent Clp protease ATP-binding subunit ClpC homolog 1 AltName: Full=Casein lytic proteinase C1 Flags: Precursor	-	784	785.1	767.7	701.8	623.4	748	1.12715	0.133854	0.172675	Nonsignificant	None	2	Molecular Function:ATP binding (GO:0005524),Biological Process:protein metabolic process (GO:0019538)	ATP-dependent Clp protease ATP-binding subunit ClpC	--	ko01100 Metabolic pathways	ATP-dependent Clp protease ATP-binding subunit ClpA	O	Posttranslational modification, protein turnover, chaperones ;
TRINITY_DN201557_c4_g1	PUR4_ARATH, RecName: Full=Probable phosphoribosylformylglycinamidine synthase, chloroplastic/mitochondrial Short=FGAM synthase Short=FGAMS EC=6.3.5.3 AltName: Full=Formylglycinamide ribonucleotide amidotransferase Short=FGAR amidotransferase Short=FGAR-AT AltName: Full=Formylglycinamide ribotide amidotransferase Flags: Precursor	-	2751.4	2846.5	2836.4	2653.8	2638	2662.6	1.06033	0.0282585	0.0845152	Nonsignificant	None	--	--	phosphoribosylformylglycinamidine synthase	6.3.5.3	ko00230 Purine metabolism ko01100 Metabolic pathways ko01110 Biosynthesis of secondary metabolites	Phosphoribosylformylglycinamidine (FGAM) synthase, glutamine amidotransferase domain	F	Nucleotide transport and metabolism ;
TRINITY_DN201916_c4_g1	CLH1_ORYSJ, RecName: Full=Clathrin heavy chain 1	-	36.9	32.9	32.7	35.2	25.3	28.5	1.15169	0.261668	0.203747	Nonsignificant	None	2	Biological Process:intracellular protein transport (GO:0006886),Biological Process:vesicle-mediated transport (GO:0016192)	clathrin heavy chain	--	ko04144 Endocytosis	--	--	--
TRINITY_DN196454_c5_g3	--	-	2887.5	2914.3	2921.3	2872.7	2753.9	2698.6	1.04779	0.11774	0.067356	Nonsignificant	None	5	Molecular Function:oxoglutarate dehydrogenase (succinyl-transferring) activity (GO:0004591),Biological Process:tricarboxylic acid cycle (GO:0006099),Biological Process:metabolic process (GO:0008152),Molecular Function:thiamine pyrophosphate binding (GO:0030976),Biological Process:oxidation-reduction process (GO:0055114)	2-oxoglutarate dehydrogenase E1 component	1.2.4.2	ko00020 Citrate cycle (TCA cycle) ko00310 Lysine degradation ko00380 Tryptophan metabolism ko01100 Metabolic pathways ko01110 Biosynthesis of secondary metabolites ko01200 Carbon metabolism	2-oxoglutarate dehydrogenase complex, dehydrogenase (E1) component, and related enzymes	C	Energy production and conversion ;
TRINITY_DN186071_c3_g4	CD48E_ARATH, RecName: Full=Cell division control protein 48 homolog E Short=AtCDC48e AltName: Full=Transitional endoplasmic reticulum ATPase E	-	487.8	464.4	463.1	441.3	450.4	455.9	1.05024	0.0877568	0.0707156	Nonsignificant	None	1	Molecular Function:ATP binding (GO:0005524)	transitional endoplasmic reticulum ATPase	--	ko04141 Protein processing in endoplasmic reticulum	ATP-dependent 26S proteasome regulatory subunit	O	Posttranslational modification, protein turnover, chaperones ;
TRINITY_DN183685_c0_g1	PGKH_TOBAC, RecName: Full=Phosphoglycerate kinase, chloroplastic EC=2.7.2.3 Flags: Precursor	-	120.4	109.7	130.6	433	119.2	115	0.540618	0.434359	-0.88732	Nonsignificant	None	2	Molecular Function:phosphoglycerate kinase activity (GO:0004618),Biological Process:glycolytic process (GO:0006096)	phosphoglycerate kinase	2.7.2.3	ko00010 Glycolysis / Gluconeogenesis ko00710 Carbon fixation in photosynthetic organisms ko01100 Metabolic pathways ko01110 Biosynthesis of secondary metabolites ko01200 Carbon metabolism ko01230 Biosynthesis of amino acids	3-phosphoglycerate kinase	G	Carbohydrate transport and metabolism ;
TRINITY_DN201747_c0_g1	GCST_ARATH, RecName: Full=Aminomethyltransferase, mitochondrial EC=2.1.2.10 AltName: Full=Glycine cleavage system T protein Short=GCVT Flags: Precursor	-	452	510.1	468.9	419.6	397	470.1	1.11215	0.160432	0.153348	Nonsignificant	None	--	--	aminomethyltransferase	2.1.2.10	ko00260 Glycine, serine and threonine metabolism ko00630 Glyoxylate and dicarboxylate metabolism ko00670 One carbon pool by folate ko01100 Metabolic pathways ko01110 Biosynthesis of secondary metabolites ko01200 Carbon metabolism	Glycine cleavage system T protein (aminomethyltransferase)	E	Amino acid transport and metabolism ;
TRINITY_DN175218_c0_g1	RUBB_PEA, RecName: Full=RuBisCO large subunit-binding protein subunit beta, chloroplastic AltName: Full=60 kDa chaperonin subunit beta AltName: Full=CPN-60 beta Flags: Precursor	-	1694.4	1654.4	1762.8	1805.4	1658.7	1615.8	1.00624	0.88183	0.00897485	Nonsignificant	None	3	Molecular Function:ATP binding (GO:0005524),Cellular Component:cytoplasm (GO:0005737),Biological Process:protein refolding (GO:0042026)	chaperonin GroEL	--	ko03018 RNA degradation	Chaperonin GroEL (HSP60 family)	O	Posttranslational modification, protein turnover, chaperones ;
TRINITY_DN196036_c0_g2	MET1_ARATH, RecName: Full=Protein MET1, chloroplastic {ECO:0000303|PubMed:25587003} AltName: Full=PDZ domain, K-box domain, and TPR region containing protein {ECO:0000303|PubMed:15914918} Flags: Precursor	-	2803.9	3066.1	2872.3	2980.6	2753.1	3100	0.989653	0.824974	-0.015005	Nonsignificant	None	1	Molecular Function:protein binding (GO:0005515)	--	--	--	Tetratricopeptide (TPR) repeat	R	General function prediction only ;
TRINITY_DN199388_c0_g1	SYA_ARATH, RecName: Full=Alanine--tRNA ligase {ECO:0000255|HAMAP-Rule:MF_03133} EC=6.1.1.7 {ECO:0000255|HAMAP-Rule:MF_03133} AltName: Full=Alanyl-tRNA synthetase {ECO:0000255|HAMAP-Rule:MF_03133} Short=AlaRS {ECO:0000255|HAMAP-Rule:MF_03133} Flags: Precursor	-	1989.8	1945.7	2019.9	2002	2095.9	2044.5	0.969556	0.150178	-0.0446041	Nonsignificant	None	7	Molecular Function:nucleotide binding (GO:0000166),Molecular Function:nucleic acid binding (GO:0003676),Molecular Function:alanine-tRNA ligase activity (GO:0004813),Molecular Function:ATP binding (GO:0005524),Cellular Component:cytoplasm (GO:0005737),Biological Process:alanyl-tRNA aminoacylation (GO:0006419),Biological Process:tRNA aminoacylation (GO:0043039)	alanyl-tRNA synthetase	6.1.1.7	ko00970 Aminoacyl-tRNA biosynthesis	Alanyl-tRNA synthetase	J	Translation, ribosomal structure and biogenesis ;
TRINITY_DN197436_c0_g3	PSBB_LOLPR, RecName: Full=Photosystem II CP47 reaction center protein {ECO:0000255|HAMAP-Rule:MF_01495} AltName: Full=PSII 47 kDa protein {ECO:0000255|HAMAP-Rule:MF_01495} AltName: Full=Protein CP-47 {ECO:0000255|HAMAP-Rule:MF_01495}	-	1087.3	1019	1047.2	1023	1031.9	1035.2	1.02052	0.398287	0.0293004	Nonsignificant	None	4	Cellular Component:photosystem (GO:0009521),Biological Process:photosynthetic electron transport chain (GO:0009767),Cellular Component:membrane (GO:0016020),Molecular Function:chlorophyll binding (GO:0016168)	photosystem II CP47 chlorophyll apoprotein	--	ko00195 Photosynthesis ko01100 Metabolic pathways	--	--	--
TRINITY_DN177788_c0_g5	FTSH1_ORYSJ, RecName: Full=ATP-dependent zinc metalloprotease FTSH 1, chloroplastic Short=OsFTSH1 EC=3.4.24.- Flags: Precursor	-	433.7	427.7	439.7	461.4	447.1	442.1	0.96335	0.084792	-0.0538686	Nonsignificant	None	3	Molecular Function:metalloendopeptidase activity (GO:0004222),Molecular Function:ATP binding (GO:0005524),Biological Process:proteolysis (GO:0006508)	cell division protease FtsH	3.4.24.-	--	ATP-dependent Zn proteases	O	Posttranslational modification, protein turnover, chaperones ;
TRINITY_DN201913_c0_g1	PAP13_ARATH, RecName: Full=Probable plastid-lipid-associated protein 13, chloroplastic AltName: Full=Fibrillin-7b Short=AtPGL30 Flags: Precursor	-	2781.7	2997.7	2855.9	2669.1	2671.3	2509	1.10012	0.0356875	0.137664	Nonsignificant	None	--	--	--	--	--	--	--	--
TRINITY_DN194935_c0_g2	ADK2_ARATH, RecName: Full=Adenosine kinase 2 Short=AK 2 EC=2.7.1.20 AltName: Full=Adenosine 5-phosphotransferase 2	-	2051.6	1866	1948.9	2003.9	2029.8	2283.2	0.928699	0.237104	-0.106717	Nonsignificant	None	2	Molecular Function:adenosine kinase activity (GO:0004001),Biological Process:purine ribonucleoside salvage (GO:0006166)	adenosine kinase	2.7.1.20	ko00230 Purine metabolism ko01100 Metabolic pathways	Sugar or nucleoside kinase, ribokinase family	G	Carbohydrate transport and metabolism ;
TRINITY_DN191352_c1_g3	CLPC1_ORYSJ, RecName: Full=Chaperone protein ClpC1, chloroplastic AltName: Full=ATP-dependent Clp protease ATP-binding subunit ClpC homolog 1 AltName: Full=Casein lytic proteinase C1 Flags: Precursor	-	667.5	623.4	680	647.9	644.8	639.1	1.02024	0.52814	0.0289088	Nonsignificant	None	1	Molecular Function:ATP binding (GO:0005524)	ATP-dependent Clp protease ATP-binding subunit ClpC	--	ko01100 Metabolic pathways	ATP-dependent Clp protease ATP-binding subunit ClpA	O	Posttranslational modification, protein turnover, chaperones ;
TRINITY_DN196463_c1_g2	BADH2_ORYSJ, RecName: Full=Betaine aldehyde dehydrogenase 2 Short=OsBADH2 EC=1.2.1.8	-	2251.3	2334.1	2399.8	2465.1	2431.6	2252.1	0.977115	0.533119	-0.0333997	Nonsignificant	None	3	Biological Process:metabolic process (GO:0008152),Molecular Function:oxidoreductase activity (GO:0016491),Biological Process:oxidation-reduction process (GO:0055114)	betaine-aldehyde dehydrogenase	1.2.1.8	ko00260 Glycine, serine and threonine metabolism ko01100 Metabolic pathways	Acyl-CoA reductase or other NAD-dependent aldehyde dehydrogenase	C	Energy production and conversion ;
TRINITY_DN201458_c6_g1	CLPC2_ORYSJ, RecName: Full=Chaperone protein ClpC2, chloroplastic AltName: Full=ATP-dependent Clp protease ATP-binding subunit ClpC homolog 2 AltName: Full=Casein lytic proteinase C2 Flags: Precursor	-	550.8	567	598.8	591.1	546.4	573.6	1.00321	0.928476	0.00462983	Nonsignificant	None	1	Molecular Function:ATP binding (GO:0005524)	ATP-dependent Clp protease ATP-binding subunit ClpC	--	ko01100 Metabolic pathways	ATP-dependent Clp protease ATP-binding subunit ClpA	O	Posttranslational modification, protein turnover, chaperones ;
TRINITY_DN199981_c1_g1	G6PIP_ARATH, RecName: Full=Glucose-6-phosphate isomerase 1, chloroplastic Short=GPI 1 EC=5.3.1.9 AltName: Full=Phosphoglucose isomerase 1 Short=PGI 1 AltName: Full=Phosphohexose isomerase Short=PHI Flags: Precursor	-	2831.5	3038.5	2858.3	2794.4	2910.2	2623	1.04812	0.278981	0.0677999	Nonsignificant	None	3	Molecular Function:glucose-6-phosphate isomerase activity (GO:0004347),Biological Process:gluconeogenesis (GO:0006094),Biological Process:glycolytic process (GO:0006096)	glucose-6-phosphate isomerase	5.3.1.9	ko00010 Glycolysis / Gluconeogenesis ko00030 Pentose phosphate pathway ko00500 Starch and sucrose metabolism ko00520 Amino sugar and nucleotide sugar metabolism ko01100 Metabolic pathways ko01110 Biosynthesis of secondary metabolites ko01200 Carbon metabolism	Glucose-6-phosphate isomerase	G	Carbohydrate transport and metabolism ;
TRINITY_DN201647_c6_g1	PUR4_ARATH, RecName: Full=Probable phosphoribosylformylglycinamidine synthase, chloroplastic/mitochondrial Short=FGAM synthase Short=FGAMS EC=6.3.5.3 AltName: Full=Formylglycinamide ribonucleotide amidotransferase Short=FGAR amidotransferase Short=FGAR-AT AltName: Full=Formylglycinamide ribotide amidotransferase Flags: Precursor	-	233.2	275.3	241.8	247.2	271.7	244.4	0.982969	0.795436	-0.0247826	Nonsignificant	None	--	--	phosphoribosylformylglycinamidine synthase	6.3.5.3	ko00230 Purine metabolism ko01100 Metabolic pathways ko01110 Biosynthesis of secondary metabolites	Phosphoribosylformylglycinamidine (FGAM) synthase, glutamine amidotransferase domain	F	Nucleotide transport and metabolism ;
TRINITY_DN198907_c1_g1	SYA_ARATH, RecName: Full=Alanine--tRNA ligase {ECO:0000255|HAMAP-Rule:MF_03133} EC=6.1.1.7 {ECO:0000255|HAMAP-Rule:MF_03133} AltName: Full=Alanyl-tRNA synthetase {ECO:0000255|HAMAP-Rule:MF_03133} Short=AlaRS {ECO:0000255|HAMAP-Rule:MF_03133} Flags: Precursor	-	350.6	346	354.1	352.4	306.5	329.7	1.06282	0.256678	0.087892	Nonsignificant	None	7	Molecular Function:nucleotide binding (GO:0000166),Molecular Function:nucleic acid binding (GO:0003676),Molecular Function:alanine-tRNA ligase activity (GO:0004813),Molecular Function:ATP binding (GO:0005524),Cellular Component:cytoplasm (GO:0005737),Biological Process:alanyl-tRNA aminoacylation (GO:0006419),Biological Process:tRNA aminoacylation (GO:0043039)	alanyl-tRNA synthetase	6.1.1.7	ko00970 Aminoacyl-tRNA biosynthesis	Alanyl-tRNA synthetase	J	Translation, ribosomal structure and biogenesis ;
TRINITY_DN184420_c2_g3	ATPBM_NICPL, RecName: Full=ATP synthase subunit beta, mitochondrial EC=3.6.3.14 Flags: Precursor	-	1026.4	1067.8	1039.5	1080.3	1084.3	1107.8	0.957615	0.0420603	-0.062482	Nonsignificant	None	1	Molecular Function:ATP binding (GO:0005524)	F-type H+-transporting ATPase subunit beta	3.6.3.14	ko00190 Oxidative phosphorylation ko01100 Metabolic pathways	FoF1-type ATP synthase, beta subunit	C	Energy production and conversion ;
TRINITY_DN185741_c1_g2	CLPB1_ORYSJ, RecName: Full=Chaperone protein ClpB1 AltName: Full=ATP-dependent Clp protease ATP-binding subunit ClpB homolog 1 AltName: Full=Casein lytic proteinase B1 AltName: Full=Heat shock protein 101	-	1513.9	1391.3	1268.7	1465.7	1449.3	1295.7	0.99126	0.8976	-0.0126641	Nonsignificant	None	1	Molecular Function:ATP binding (GO:0005524)	ATP-dependent Clp protease ATP-binding subunit ClpB	--		ATP-dependent Clp protease ATP-binding subunit ClpA	O	Posttranslational modification, protein turnover, chaperones ;
TRINITY_DN184291_c0_g1	SUCB_ORYSJ, RecName: Full=Succinate--CoA ligase [ADP-forming] subunit beta, mitochondrial {ECO:0000255|HAMAP-Rule:MF_03219} EC=6.2.1.5 {ECO:0000255|HAMAP-Rule:MF_03219} AltName: Full=Succinyl-CoA synthetase beta chain {ECO:0000255|HAMAP-Rule:MF_03219} Short=SCS-beta {ECO:0000255|HAMAP-Rule:MF_03219} Flags: Precursor	-	2757.8	2686.9	2705.9	2650.5	2532.7	2572.5	1.05092	0.0413443	0.0716493	Nonsignificant	None	4	Molecular Function:catalytic activity (GO:0003824),Molecular Function:ATP binding (GO:0005524),Biological Process:metabolic process (GO:0008152),Molecular Function:metal ion binding (GO:0046872)	--	--	ko00020 Citrate cycle (TCA cycle) ko00640 Propanoate metabolism ko01100 Metabolic pathways ko01110 Biosynthesis of secondary metabolites ko01200 Carbon metabolism	Succinyl-CoA synthetase, beta subunit	C	Energy production and conversion ;
TRINITY_DN175716_c1_g3	RCAB_HORVU, RecName: Full=Ribulose bisphosphate carboxylase/oxygenase activase B, chloroplastic Short=RA B Short=RuBisCO activase B Flags: Precursor	-	57.3	68	69.9	64.6	63.4	59.3	1.04218	0.583597	0.0596022	Nonsignificant	None	--	--	--	--	--	Ribulose bisphosphate carboxylase small subunit	G	Carbohydrate transport and metabolism ;
TRINITY_DN180151_c0_g2	G3PA_MAIZE, RecName: Full=Glyceraldehyde-3-phosphate dehydrogenase A, chloroplastic EC=1.2.1.13 AltName: Full=NADP-dependent glyceraldehydephosphate dehydrogenase subunit A Flags: Precursor	-	919.9	1018.4	928.5	855.1	1042.2	1012.1	0.985358	0.843102	-0.0212804	Nonsignificant	None	1	Biological Process:oxidation-reduction process (GO:0055114)	glyceraldehyde-3-phosphate dehydrogenase (NADP+) (phosphorylating)	1.2.1.13	ko00710 Carbon fixation in photosynthetic organisms ko01100 Metabolic pathways ko01200 Carbon metabolism	Glyceraldehyde-3-phosphate dehydrogenase/erythrose-4-phosphate dehydrogenase	G	Carbohydrate transport and metabolism ;
TRINITY_DN202013_c3_g2	GCSP_PEA, RecName: Full=Glycine dehydrogenase (decarboxylating), mitochondrial EC=1.4.4.2 AltName: Full=Glycine cleavage system P protein AltName: Full=Glycine decarboxylase AltName: Full=Glycine dehydrogenase (aminomethyl-transferring) Flags: Precursor	-	1450.9	1600.7	1412.4	1514.4	1655.1	1512.7	0.953398	0.385174	-0.0688495	Nonsignificant	None	3	Molecular Function:glycine dehydrogenase (decarboxylating) activity (GO:0004375),Biological Process:glycine catabolic process (GO:0006546),Biological Process:oxidation-reduction process (GO:0055114)	glycine dehydrogenase	1.4.4.2	ko00260 Glycine, serine and threonine metabolism ko00630 Glyoxylate and dicarboxylate metabolism ko01100 Metabolic pathways ko01110 Biosynthesis of secondary metabolites ko01200 Carbon metabolism	Glycine cleavage system protein P (pyridoxal-binding), C-terminal domain	E	Amino acid transport and metabolism ;
TRINITY_DN201806_c3_g2	--	-	1921.5	1746.2	1817.1	1713.6	1670.8	1688.1	1.08128	0.106818	0.112742	Nonsignificant	None	--	--	--	--	--	--	--	--
TRINITY_DN201574_c3_g4	GGT2_ARATH, RecName: Full=Glutamate--glyoxylate aminotransferase 2 Short=AtGGT2 EC=2.6.1.4 AltName: Full=Alanine aminotransferase GGT2 EC=2.6.1.2 AltName: Full=Alanine--glyoxylate aminotransferase GGT2 EC=2.6.1.44 AltName: Full=Alanine-2-oxoglutarate aminotransferase 2 EC=2.6.1.-	-	2980.4	3208	3024.2	3200.8	3190.2	3428.2	0.938223	0.125496	-0.0919971	Nonsignificant	None	--	--	--	--	ko00220 Arginine biosynthesis ko00250 Alanine, aspartate and glutamate metabolism ko00260 Glycine, serine and threonine metabolism ko00630 Glyoxylate and dicarboxylate metabolism ko00710 Carbon fixation in photosynthetic organisms ko01100 Metabolic pathways ko01110 Biosynthesis of secondary metabolites ko01200 Carbon metabolism ko01210 2-Oxocarboxylic acid metabolism ko01230 Biosynthesis of amino…	Aspartate/methionine/tyrosine aminotransferase	E	Amino acid transport and metabolism ;
TRINITY_DN186407_c2_g4	PSBB_AGRST, RecName: Full=Photosystem II CP47 reaction center protein {ECO:0000255|HAMAP-Rule:MF_01495} AltName: Full=PSII 47 kDa protein {ECO:0000255|HAMAP-Rule:MF_01495} AltName: Full=Protein CP-47 {ECO:0000255|HAMAP-Rule:MF_01495}	-	3840	3826.5	3825.2	3734.6	4358.6	3803.2	0.965981	0.56523	-0.0499328	Nonsignificant	None	4	Cellular Component:photosystem (GO:0009521),Biological Process:photosynthetic electron transport chain (GO:0009767),Cellular Component:membrane (GO:0016020),Molecular Function:chlorophyll binding (GO:0016168)	photosystem II CP47 chlorophyll apoprotein	--	ko00195 Photosynthesis ko01100 Metabolic pathways	--	--	--
TRINITY_DN198047_c2_g1	PLDA1_ORYSJ, RecName: Full=Phospholipase D alpha 1 Short=PLD alpha 1 EC=3.1.4.4 AltName: Full=Choline phosphatase 1 AltName: Full=Phosphatidylcholine-hydrolyzing phospholipase D 1 Flags: Precursor	-	1925.4	1718.4	1928.3	1900.8	1792	1682.8	1.03655	0.523601	0.0517954	Nonsignificant	None	2	Molecular Function:catalytic activity (GO:0003824),Molecular Function:protein binding (GO:0005515)	phospholipase D1/2	3.1.4.4	ko00564 Glycerophospholipid metabolism ko00565 Ether lipid metabolism ko01100 Metabolic pathways ko01110 Biosynthesis of secondary metabolites ko04144 Endocytosis	Phosphatidylserine/phosphatidylglycerophosphate/cardiolipin synthase or related enzyme	I	Lipid transport and metabolism ;
TRINITY_DN191683_c0_g1	SERA2_ARATH, RecName: Full=D-3-phosphoglycerate dehydrogenase 2, chloroplastic Short=PGDH EC=1.1.1.95 {ECO:0000269|PubMed:24368794, ECO:0000269|PubMed:9867856} Flags: Precursor	-	2528	2381	2484.2	2202.5	2221.9	2313.1	1.09732	0.0187386	0.133986	Nonsignificant	None	4	Biological Process:metabolic process (GO:0008152),Molecular Function:amino acid binding (GO:0016597),Molecular Function:NAD binding (GO:0051287),Biological Process:oxidation-reduction process (GO:0055114)	--	--	ko00260 Glycine, serine and threonine metabolism ko01100 Metabolic pathways ko01200 Carbon metabolism ko01230 Biosynthesis of amino acids	Phosphoglycerate dehydrogenase or related dehydrogenase	HR	Coenzyme transport and metabolism ; General function prediction only ;
TRINITY_DN201693_c8_g2	PSA_ORYSJ, RecName: Full=Puromycin-sensitive aminopeptidase Short=PSA EC=3.4.11.14 AltName: Full=Cytosol alanyl aminopeptidase Short=AAP-S	-	18.5	25.4	19	23.6	21.3	19	0.984351	0.905042	-0.0227559	Nonsignificant	None	1	Biological Process:proteolysis (GO:0006508)	aminopeptidase N	3.4.11.2	ko00480 Glutathione metabolism ko01100 Metabolic pathways	Aminopeptidase N	E	Amino acid transport and metabolism ;
TRINITY_DN181318_c3_g5	ENO_ORYSJ, RecName: Full=Enolase EC=4.2.1.11 AltName: Full=2-phospho-D-glycerate hydro-lyase AltName: Full=2-phosphoglycerate dehydratase AltName: Full=OSE1	-	521.6	558.8	554.9	658.9	651.3	572.4	0.868639	0.0799078	-0.203171	Nonsignificant	None	4	Cellular Component:phosphopyruvate hydratase complex (GO:0000015),Molecular Function:magnesium ion binding (GO:0000287),Molecular Function:phosphopyruvate hydratase activity (GO:0004634),Biological Process:glycolytic process (GO:0006096)	enolase	4.2.1.11	ko00010 Glycolysis / Gluconeogenesis ko01100 Metabolic pathways ko01110 Biosynthesis of secondary metabolites ko01200 Carbon metabolism ko01230 Biosynthesis of amino acids ko03018 RNA degradation	Enolase	G	Carbohydrate transport and metabolism ;
TRINITY_DN191737_c4_g3	PSAB_AGRST, RecName: Full=Photosystem I P700 chlorophyll a apoprotein A2 {ECO:0000255|HAMAP-Rule:MF_00482} EC=1.97.1.12 {ECO:0000255|HAMAP-Rule:MF_00482} AltName: Full=PSI-B {ECO:0000255|HAMAP-Rule:MF_00482} AltName: Full=PsaB {ECO:0000255|HAMAP-Rule:MF_00482}	-	2955.8	2839.5	2768.1	2857.3	3123.6	2749.4	0.980883	0.684761	-0.0278475	Nonsignificant	None	4	Cellular Component:photosystem I (GO:0009522),Cellular Component:thylakoid (GO:0009579),Biological Process:photosynthesis (GO:0015979),Cellular Component:integral component of membrane (GO:0016021)	photosystem I P700 chlorophyll a apoprotein A2	--	ko00195 Photosynthesis ko01100 Metabolic pathways	Outer membrane protein OmpA and related peptidoglycan-associated (lipo)proteins	M	Cell wall/membrane/envelope biogenesis ;
TRINITY_DN183329_c2_g2	ATP7_ARATH, RecName: Full=Probable ATP synthase 24 kDa subunit, mitochondrial Flags: Precursor	-	3074.4	3034.6	3296.3	2975.1	2933.2	3080.9	1.04629	0.228654	0.0652812	Nonsignificant	None	1	Biological Process:pollen development (GO:0009555)	--	--	--	--	--	--
TRINITY_DN200701_c1_g1	AAE16_ARATH, RecName: Full=Probable acyl-activating enzyme 16, chloroplastic EC=6.2.1.- Flags: Precursor	-	1900.2	2311.4	2813.3	2290.4	1971.6	1465	1.22663	0.292818	0.294698	Nonsignificant	None	2	Molecular Function:catalytic activity (GO:0003824),Biological Process:metabolic process (GO:0008152)	long-chain acyl-CoA synthetase	6.2.1.3	ko00061 Fatty acid biosynthesis ko00071 Fatty acid degradation ko01100 Metabolic pathways ko01212 Fatty acid metabolism ko04146 Peroxisome	Long-chain acyl-CoA synthetase (AMP-forming)	I	Lipid transport and metabolism ;
TRINITY_DN198626_c7_g2	GLYM1_FLAPR, RecName: Full=Serine hydroxymethyltransferase 1, mitochondrial Short=SHMT1 EC=2.1.2.1 AltName: Full=Glycine hydroxymethyltransferase 1 AltName: Full=Serine methylase 1 Flags: Precursor	-	1804	2007.2	1921.6	1746.9	1661.3	2112.7	1.03838	0.673957	0.0543365	Nonsignificant	None	1	Molecular Function:transferase activity (GO:0016740)	glycine hydroxymethyltransferase	2.1.2.1	ko00260 Glycine, serine and threonine metabolism ko00460 Cyanoamino acid metabolism ko00630 Glyoxylate and dicarboxylate metabolism ko00670 One carbon pool by folate ko01100 Metabolic pathways ko01110 Biosynthesis of secondary metabolites ko01200 Carbon metabolism ko01230 Biosynthesis of amino acids	Glycine/serine hydroxymethyltransferase	E	Amino acid transport and metabolism ;
TRINITY_DN197574_c1_g1	HSP7M_PHAVU, RecName: Full=Heat shock 70 kDa protein, mitochondrial Flags: Precursor	-	423.1	448	401.4	431.3	405	352.3	1.07059	0.369587	0.0984024	Nonsignificant	None	--	--	molecular chaperone DnaK	--	ko03018 RNA degradation	Molecular chaperone DnaK (HSP70)	O	Posttranslational modification, protein turnover, chaperones ;
TRINITY_DN195359_c0_g1	TIC40_PEA, RecName: Full=Protein TIC 40, chloroplastic AltName: Full=Translocon at the inner envelope membrane of chloroplasts 40 Short=PsTIC40 Flags: Precursor	-	1722.8	1650.5	1755.7	1735.3	1885.3	1724.2	0.959624	0.313812	-0.0594584	Nonsignificant	None	--	--	--	--	--	--	--	--
TRINITY_DN188684_c0_g1	DHAR2_ORYSJ, RecName: Full=Probable glutathione S-transferase DHAR2, chloroplastic {ECO:0000305} EC=2.5.1.18 {ECO:0000305} AltName: Full=GSH-dependent dehydroascorbate reductase 2 {ECO:0000305} Short=OsDHAR2 {ECO:0000303|PubMed:20109239} EC=1.8.5.1 {ECO:0000305} AltName: Full=Glutathione-dependent dehydroascorbate reductase 2 {ECO:0000305} Flags: Precursor	-	2951.6	3304.8	3181	3183.7	3168.5	2947.6	1.0148	0.740764	0.0211898	Nonsignificant	None	1	Molecular Function:protein binding (GO:0005515)	--	--	ko00053 Ascorbate and aldarate metabolism ko00480 Glutathione metabolism ko01100 Metabolic pathways	Glutathione S-transferase	O	Posttranslational modification, protein turnover, chaperones ;
TRINITY_DN198449_c3_g1	ATP7_ARATH, RecName: Full=Probable ATP synthase 24 kDa subunit, mitochondrial Flags: Precursor	-	10.1	7.6	11.6	9	12.7	10.3	0.915625	0.602284	-0.127171	Nonsignificant	None	1	Biological Process:pollen development (GO:0009555)	--	--	--	--	--	--
TRINITY_DN180447_c0_g1	ALFP_ORYSJ, RecName: Full=Fructose-bisphosphate aldolase, chloroplastic {ECO:0000305} EC=4.1.2.13 {ECO:0000305} AltName: Full=Chloroplastic aldolase {ECO:0000303|PubMed:8163192} Short=AldP {ECO:0000303|PubMed:8163192} Flags: Precursor	-	2625.3	3052.8	2768	2632.4	2850.8	3203.5	0.972302	0.721452	-0.0405229	Nonsignificant	None	2	Molecular Function:fructose-bisphosphate aldolase activity (GO:0004332),Biological Process:glycolytic process (GO:0006096)	--	--	--	Fructose-bisphosphate aldolase class 1	G	Carbohydrate transport and metabolism ;
TRINITY_DN195988_c0_g1	APM1A_ORYSJ, RecName: Full=Aminopeptidase M1-A EC=3.4.11.2 AltName: Full=Alpha-aminoacylpeptide hydrolase	-	2438.5	2373.4	2249.1	2486.6	2394.9	2336.4	0.978262	0.502599	-0.0317066	Nonsignificant	None	3	Biological Process:proteolysis (GO:0006508),Molecular Function:metallopeptidase activity (GO:0008237),Molecular Function:zinc ion binding (GO:0008270)	puromycin-sensitive aminopeptidase	3.4.11.-	--	Aminopeptidase N	E	Amino acid transport and metabolism ;
TRINITY_DN196878_c0_g1	IM30_ORYSJ, RecName: Full=Probable membrane-associated 30 kDa protein, chloroplastic Flags: Precursor	-	2194.2	2290.3	2239.8	2251.2	2258.7	2325.9	0.983689	0.367733	-0.0237261	Nonsignificant	None	--	--	phage shock protein A	--	--	Phage shock protein A	KT	Transcription ; Signal transduction mechanisms ;
TRINITY_DN178163_c6_g2	HSP7C_PETHY, RecName: Full=Heat shock cognate 70 kDa protein	-	386.2	375.9	270.4	377.2	294.2	236.4	1.13737	0.493175	0.185695	Nonsignificant	None	--	--	heat shock 70kDa protein 1/2/6/8	--	ko03040 Spliceosome ko04141 Protein processing in endoplasmic reticulum ko04144 Endocytosis	Molecular chaperone DnaK (HSP70)	O	Posttranslational modification, protein turnover, chaperones ;
TRINITY_DN176732_c3_g2	HSP7C_PETHY, RecName: Full=Heat shock cognate 70 kDa protein	-	1261.9	1287.6	1426.5	1369.8	1358	1358.6	0.972984	0.546681	-0.0395127	Nonsignificant	None	--	--	heat shock 70kDa protein 1/2/6/8	--	ko03040 Spliceosome ko04141 Protein processing in endoplasmic reticulum ko04144 Endocytosis	Molecular chaperone DnaK (HSP70)	O	Posttranslational modification, protein turnover, chaperones ;
TRINITY_DN169300_c2_g1	AOR_ARATH, RecName: Full=NADPH-dependent alkenal/one oxidoreductase, chloroplastic {ECO:0000303|PubMed:21169366} Short=AtAOR {ECO:0000303|PubMed:21169366} EC=1.3.1.- {ECO:0000269|PubMed:21169366} Flags: Precursor	-	746.9	856.5	779.6	741.8	790.7	773.2	1.03353	0.524779	0.0475741	Nonsignificant	None	1	Biological Process:oxidation-reduction process (GO:0055114)	2-methylene-furan-3-one reductase	1.3.1.105	--	NADPH:quinone reductase or related Zn-dependent oxidoreductase	CR	Energy production and conversion ; General function prediction only ;
TRINITY_DN201152_c2_g2	RCAB_HORVU, RecName: Full=Ribulose bisphosphate carboxylase/oxygenase activase B, chloroplastic Short=RA B Short=RuBisCO activase B Flags: Precursor	-	343.7	398.9	329.7	483	342.7	267.7	0.980702	0.923879	-0.0281127	Nonsignificant	None	--	--	--	--	--	Ribulose bisphosphate carboxylase small subunit	G	Carbohydrate transport and metabolism ;
TRINITY_DN200719_c3_g2	TPPII_ORYSJ, RecName: Full=Tripeptidyl-peptidase 2 EC=3.4.14.10 AltName: Full=Tripeptidyl-peptidase II Short=TPPII	-	375.2	359.8	481.8	466.8	417.8	386	0.957658	0.714452	-0.0624179	Nonsignificant	None	2	Molecular Function:serine-type endopeptidase activity (GO:0004252),Biological Process:proteolysis (GO:0006508)	tripeptidyl-peptidase II	3.4.14.10	--	Serine protease, subtilisin family	O	Posttranslational modification, protein turnover, chaperones ;
TRINITY_DN197273_c1_g1	APM1A_ORYSJ, RecName: Full=Aminopeptidase M1-A EC=3.4.11.2 AltName: Full=Alpha-aminoacylpeptide hydrolase	-	210.8	207.7	169.2	202.5	194.7	196.1	0.990561	0.902677	-0.0136819	Nonsignificant	None	3	Biological Process:proteolysis (GO:0006508),Molecular Function:metallopeptidase activity (GO:0008237),Molecular Function:zinc ion binding (GO:0008270)	puromycin-sensitive aminopeptidase	3.4.11.-	--	Aminopeptidase N	E	Amino acid transport and metabolism ;
TRINITY_DN176475_c2_g1	BXL4_ARATH, RecName: Full=Beta-D-xylosidase 4 Short=AtBXL4 EC=3.2.1.37 Flags: Precursor	-	2237.2	2507.8	2257.7	2191.3	2567.6	2728.9	0.935215	0.436719	-0.0966306	Nonsignificant	None	1	Biological Process:carbohydrate metabolic process (GO:0005975)	xylan 1,4-beta-xylosidase	3.2.1.37	ko00520 Amino sugar and nucleotide sugar metabolism ko01100 Metabolic pathways	Periplasmic beta-glucosidase and related glycosidases	G	Carbohydrate transport and metabolism ;
TRINITY_DN173135_c0_g3	GLYM_SOLTU, RecName: Full=Serine hydroxymethyltransferase, mitochondrial Short=SHMT EC=2.1.2.1 AltName: Full=Glycine hydroxymethyltransferase AltName: Full=Serine methylase Flags: Precursor	-	2170.1	2314.3	2161.3	2319.5	2528.7	2485.2	0.906224	0.0502555	-0.142061	Nonsignificant	None	1	Molecular Function:transferase activity (GO:0016740)	glycine hydroxymethyltransferase	2.1.2.1	ko00260 Glycine, serine and threonine metabolism ko00460 Cyanoamino acid metabolism ko00630 Glyoxylate and dicarboxylate metabolism ko00670 One carbon pool by folate ko01100 Metabolic pathways ko01110 Biosynthesis of secondary metabolites ko01200 Carbon metabolism ko01230 Biosynthesis of amino acids	Glycine/serine hydroxymethyltransferase	E	Amino acid transport and metabolism ;
TRINITY_DN197725_c2_g4	GLGS_HORVU, RecName: Full=Glucose-1-phosphate adenylyltransferase small subunit, chloroplastic/amyloplastic EC=2.7.7.27 AltName: Full=ADP-glucose pyrophosphorylase AltName: Full=ADP-glucose synthase AltName: Full=AGPase B AltName: Full=Alpha-D-glucose-1-phosphate adenyl transferase Flags: Precursor	-	2282	2665.3	2399.2	2492.2	2294.1	2266.6	1.04163	0.512274	0.0588405	Nonsignificant	None	2	Biological Process:biosynthetic process (GO:0009058),Molecular Function:nucleotidyltransferase activity (GO:0016779)	glucose-1-phosphate adenylyltransferase	2.7.7.27	ko00500 Starch and sucrose metabolism ko00520 Amino sugar and nucleotide sugar metabolism ko01100 Metabolic pathways ko01110 Biosynthesis of secondary metabolites	ADP-glucose pyrophosphorylase	G	Carbohydrate transport and metabolism ;
TRINITY_DN201168_c5_g1	UBE12_WHEAT, RecName: Full=Ubiquitin-activating enzyme E1 2 EC=6.2.1.45 {ECO:0000250|UniProtKB:P20973}	-	2281.9	2199.8	2253.9	2415.6	2301.7	2272.1	0.963688	0.185557	-0.0533621	Nonsignificant	None	2	Biological Process:cellular protein modification process (GO:0006464),Molecular Function:small protein activating enzyme activity (GO:0008641)	ubiquitin-activating enzyme E1	6.2.1.45	ko04120 Ubiquitin mediated proteolysis	Ubiquitin	O	Posttranslational modification, protein turnover, chaperones ;
TRINITY_DN181893_c4_g3	DTC_ARATH, RecName: Full=Mitochondrial dicarboxylate/tricarboxylate transporter DTC AltName: Full=Dicarboxylate/tricarboxylate carrier	-	1940.9	2116.7	2117.3	2087.9	2202.5	2144.8	0.959551	0.284195	-0.0595692	Nonsignificant	None	--	--	solute carrier family 25 (mitochondrial oxoglutarate transporter), member 11	--	--	--	--	--
TRINITY_DN173688_c2_g1	PER1_HORVU, RecName: Full=Peroxidase 1 EC=1.11.1.7 Flags: Precursor	-	3505	2988.7	3086.7	2296.9	2641.6	1836.7	1.41404	0.0356179	0.499822	Significant	up	4	Molecular Function:peroxidase activity (GO:0004601),Biological Process:response to oxidative stress (GO:0006979),Molecular Function:heme binding (GO:0020037),Biological Process:oxidation-reduction process (GO:0055114)	peroxidase	1.11.1.7	ko00940 Phenylpropanoid biosynthesis ko01100 Metabolic pathways ko01110 Biosynthesis of secondary metabolites	--	--	--
TRINITY_DN181593_c1_g3	RCAA_HORVU, RecName: Full=Ribulose bisphosphate carboxylase/oxygenase activase A, chloroplastic Short=RA A Short=RuBisCO activase A Flags: Precursor	-	620.8	712.8	750.6	782	521.7	769.2	1.00545	0.970434	0.00784321	Nonsignificant	None	1	Molecular Function:ATP binding (GO:0005524)	--	--	--	Ribulose bisphosphate carboxylase small subunit	G	Carbohydrate transport and metabolism ;
TRINITY_DN196717_c0_g1	SERA2_ARATH, RecName: Full=D-3-phosphoglycerate dehydrogenase 2, chloroplastic Short=PGDH EC=1.1.1.95 {ECO:0000269|PubMed:24368794, ECO:0000269|PubMed:9867856} Flags: Precursor	-	39.9	32.1	33.8	26.6	34.2	31.6	1.14502	0.24189	0.195375	Nonsignificant	None	4	Biological Process:metabolic process (GO:0008152),Molecular Function:amino acid binding (GO:0016597),Molecular Function:NAD binding (GO:0051287),Biological Process:oxidation-reduction process (GO:0055114)	--	--	ko00260 Glycine, serine and threonine metabolism ko01100 Metabolic pathways ko01200 Carbon metabolism ko01230 Biosynthesis of amino acids	Phosphoglycerate dehydrogenase or related dehydrogenase	HR	Coenzyme transport and metabolism ; General function prediction only ;
TRINITY_DN201900_c0_g1	PSBQ1_MAIZE, RecName: Full=Oxygen-evolving enhancer protein 3-1, chloroplastic Short=OEE3 AltName: Full=16 kDa subunit of oxygen evolving system of photosystem II AltName: Full=OEC 16 kDa subunit Flags: Precursor	-	6941.6	7139.9	7530.7	7068.5	7154	7812.1	0.98083	0.656718	-0.0279248	Nonsignificant	None	5	Molecular Function:calcium ion binding (GO:0005509),Cellular Component:photosystem II (GO:0009523),Cellular Component:photosystem II oxygen evolving complex (GO:0009654),Biological Process:photosynthesis (GO:0015979),Cellular Component:extrinsic component of membrane (GO:0019898)	--	--	--	--	--	--
TRINITY_DN187882_c0_g1	HSOP_WHEAT, RecName: Full=Hsp70-Hsp90 organizing protein Short=TaHop	-	2693.4	2485.6	2508.6	2788.5	2555.1	2508.9	0.979	0.641449	-0.0306188	Nonsignificant	None	1	Molecular Function:protein binding (GO:0005515)	stress-induced-phosphoprotein 1	--		Tetratricopeptide (TPR) repeat	R	General function prediction only ;
TRINITY_DN171047_c2_g6	METE2_ORYSJ, RecName: Full=5-methyltetrahydropteroyltriglutamate--homocysteine methyltransferase 2 EC=2.1.1.14 AltName: Full=Cobalamin-independent methionine synthase 2	-	2875.7	2439.3	2635.7	2543.2	2700.8	3005.8	0.963745	0.619349	-0.0532773	Nonsignificant	None	4	Molecular Function:5-methyltetrahydropteroyltriglutamate-homocysteine S-methyltransferase activity (GO:0003871),Molecular Function:zinc ion binding (GO:0008270),Biological Process:cellular amino acid biosynthetic process (GO:0008652),Biological Process:methionine biosynthetic process (GO:0009086)	5-methyltetrahydropteroyltriglutamate--homocysteine methyltransferase	2.1.1.14	ko00270 Cysteine and methionine metabolism ko00450 Selenocompound metabolism ko01100 Metabolic pathways ko01110 Biosynthesis of secondary metabolites ko01230 Biosynthesis of amino acids	Methionine synthase II (cobalamin-independent)	E	Amino acid transport and metabolism ;
TRINITY_DN185450_c0_g2	RUBA_PEA, RecName: Full=RuBisCO large subunit-binding protein subunit alpha, chloroplastic AltName: Full=60 kDa chaperonin subunit alpha AltName: Full=CPN-60 alpha Flags: Precursor	-	1103.3	1102	1096.8	1165.8	1074.8	1215.3	0.955496	0.338857	-0.0656777	Nonsignificant	None	3	Molecular Function:ATP binding (GO:0005524),Cellular Component:cytoplasm (GO:0005737),Biological Process:protein refolding (GO:0042026)	--	--	--	Chaperonin GroEL (HSP60 family)	O	Posttranslational modification, protein turnover, chaperones ;
TRINITY_DN179801_c0_g6	CYF_AGRST, RecName: Full=Cytochrome f {ECO:0000255|HAMAP-Rule:MF_00610} Flags: Precursor	-	3445.3	3572.1	3412.1	3493.8	2974.7	3582.2	1.03769	0.578023	0.053374	Nonsignificant	None	5	Molecular Function:iron ion binding (GO:0005506),Molecular Function:electron carrier activity (GO:0009055),Biological Process:photosynthesis (GO:0015979),Molecular Function:heme binding (GO:0020037),Cellular Component:integral component of thylakoid membrane (GO:0031361)	apocytochrome f	--	ko00195 Photosynthesis ko01100 Metabolic pathways	Murein DD-endopeptidase MepM and murein hydrolase activator NlpD, contain LysM domain	M	Cell wall/membrane/envelope biogenesis ;
TRINITY_DN190740_c0_g1	6PGD1_ORYSJ, RecName: Full=6-phosphogluconate dehydrogenase, decarboxylating 1 Short=OsG6PGH1 EC=1.1.1.44	-	2667.1	2564.1	2672.8	2729	2524.2	2608.6	1.00537	0.850819	0.00772328	Nonsignificant	None	3	Molecular Function:phosphogluconate dehydrogenase (decarboxylating) activity (GO:0004616),Biological Process:pentose-phosphate shunt (GO:0006098),Biological Process:oxidation-reduction process (GO:0055114)	--	--	ko00030 Pentose phosphate pathway ko00480 Glutathione metabolism ko01100 Metabolic pathways ko01110 Biosynthesis of secondary metabolites ko01200 Carbon metabolism	6-phosphogluconate dehydrogenase	G	Carbohydrate transport and metabolism ;
TRINITY_DN200258_c1_g3	AVP_VIGRR, RecName: Full=Pyrophosphate-energized vacuolar membrane proton pump EC=3.6.1.1 AltName: Full=Pyrophosphate-energized inorganic pyrophosphatase Short=H(+)-PPase AltName: Full=Vacuolar H(+)-pyrophosphatase	-	1998.8	1968	2131.6	2245.6	1875.2	2145.6	0.97319	0.678366	-0.0392061	Nonsignificant	None	4	Molecular Function:inorganic diphosphatase activity (GO:0004427),Molecular Function:hydrogen-translocating pyrophosphatase activity (GO:0009678),Biological Process:proton transport (GO:0015992),Cellular Component:membrane (GO:0016020)	inorganic pyrophosphatase	3.6.1.1	ko00190 Oxidative phosphorylation	Na+ or H+-translocating membrane pyrophosphatase	C	Energy production and conversion ;
TRINITY_DN193344_c2_g2	ATPA_AGRST, RecName: Full=ATP synthase subunit alpha, chloroplastic {ECO:0000255|HAMAP-Rule:MF_01346} EC=3.6.3.14 {ECO:0000255|HAMAP-Rule:MF_01346} AltName: Full=ATP synthase F1 sector subunit alpha {ECO:0000255|HAMAP-Rule:MF_01346} AltName: Full=F-ATPase subunit alpha {ECO:0000255|HAMAP-Rule:MF_01346}	-	5052.2	5617	5396	5310	5075.4	5404.3	1.01745	0.661458	0.0249552	Nonsignificant	None	2	Molecular Function:ATP binding (GO:0005524),Biological Process:ATP synthesis coupled proton transport (GO:0015986)	F-type H+-transporting ATPase subunit alpha	3.6.3.14	ko00190 Oxidative phosphorylation ko00195 Photosynthesis ko01100 Metabolic pathways	FoF1-type ATP synthase, alpha subunit	C	Energy production and conversion ;
TRINITY_DN196282_c2_g1	OOPDA_ARATH, RecName: Full=Organellar oligopeptidase A, chloroplastic/mitochondrial EC=3.4.24.70 AltName: Full=Thimet metalloendopeptidase 1 AltName: Full=Zincin-like metalloproteases family protein 1 Flags: Precursor	-	83.3	77.8	80.2	92.4	83.4	80.4	0.941842	0.303908	-0.0864426	Nonsignificant	None	2	Molecular Function:metalloendopeptidase activity (GO:0004222),Biological Process:proteolysis (GO:0006508)	oligopeptidase A	3.4.24.70	--	Zn-dependent oligopeptidase	E	Amino acid transport and metabolism ;
TRINITY_DN188858_c0_g1	TL29_SOLLC, RecName: Full=Thylakoid lumenal 29 kDa protein, chloroplastic Short=TL29 EC=1.-.-.- AltName: Full=LeAPx09 AltName: Full=P29 Flags: Precursor	-	2509.4	2733	2560	2696	2455.7	2414.8	1.03118	0.519432	0.0442918	Nonsignificant	None	4	Molecular Function:peroxidase activity (GO:0004601),Biological Process:response to oxidative stress (GO:0006979),Molecular Function:heme binding (GO:0020037),Biological Process:oxidation-reduction process (GO:0055114)	L-ascorbate peroxidase	1.11.1.11	ko00053 Ascorbate and aldarate metabolism ko00480 Glutathione metabolism	--	--	--
TRINITY_DN201637_c1_g1	IN21B_ORYSJ, RecName: Full=Protein IN2-1 homolog B AltName: Full=Glutathione S-transferase GSTZ5	-	3486.3	3208.3	2883.3	3460.5	3435.5	2769.5	0.990937	0.92379	-0.013135	Nonsignificant	None	1	Molecular Function:protein binding (GO:0005515)	glutathione S-transferase	2.5.1.18	ko00480 Glutathione metabolism	Glutathione S-transferase	O	Posttranslational modification, protein turnover, chaperones ;
TRINITY_DN195910_c1_g1	KPPR_WHEAT, RecName: Full=Phosphoribulokinase, chloroplastic Short=PRK Short=PRKase EC=2.7.1.19 AltName: Full=Phosphopentokinase Flags: Precursor	-	1120.4	1173.1	1105.8	1138.9	1365.8	1200.8	0.917366	0.267495	-0.124431	Nonsignificant	None	5	Molecular Function:ATP binding (GO:0005524),Biological Process:carbohydrate metabolic process (GO:0005975),Biological Process:metabolic process (GO:0008152),Molecular Function:phosphoribulokinase activity (GO:0008974),Molecular Function:kinase activity (GO:0016301)	phosphoribulokinase	2.7.1.19	ko00710 Carbon fixation in photosynthetic organisms ko01100 Metabolic pathways ko01200 Carbon metabolism	Uridine kinase	F	Nucleotide transport and metabolism ;
TRINITY_DN192176_c1_g2	6PGD1_ORYSJ, RecName: Full=6-phosphogluconate dehydrogenase, decarboxylating 1 Short=OsG6PGH1 EC=1.1.1.44	-	244.8	242.2	234.4	248.8	231.1	204.8	1.0536	0.441573	0.0753274	Nonsignificant	None	3	Molecular Function:phosphogluconate dehydrogenase (decarboxylating) activity (GO:0004616),Biological Process:pentose-phosphate shunt (GO:0006098),Biological Process:oxidation-reduction process (GO:0055114)	--	--	ko00030 Pentose phosphate pathway ko00480 Glutathione metabolism ko01100 Metabolic pathways ko01110 Biosynthesis of secondary metabolites ko01200 Carbon metabolism	6-phosphogluconate dehydrogenase	G	Carbohydrate transport and metabolism ;
TRINITY_DN195348_c2_g1	DHAR1_ORYSJ, RecName: Full=Probable glutathione S-transferase DHAR1, cytosolic {ECO:0000305} EC=2.5.1.18 {ECO:0000305} AltName: Full=GSH-dependent dehydroascorbate reductase 1 {ECO:0000303|PubMed:10648822} Short=OsDHAR1 {ECO:0000303|PubMed:20109239} EC=1.8.5.1 {ECO:0000269|PubMed:19011360} AltName: Full=Glutathione-dependent dehydroascorbate reductase 1 {ECO:0000305}	-	1863.2	1772.6	1749.2	1741.2	1876.2	1712.1	1.01041	0.779845	0.0149462	Nonsignificant	None	1	Molecular Function:protein binding (GO:0005515)	--	--	ko00053 Ascorbate and aldarate metabolism ko00480 Glutathione metabolism ko01100 Metabolic pathways	Glutathione S-transferase	O	Posttranslational modification, protein turnover, chaperones ;
TRINITY_DN185546_c0_g2	IPYR6_ARATH, RecName: Full=Soluble inorganic pyrophosphatase 6, chloroplastic {ECO:0000303|PubMed:15135060} EC=3.6.1.1 {ECO:0000269|PubMed:15135060} AltName: Full=Inorganic pyrophosphatase 6 AltName: Full=Pyrophosphate phospho-hydrolase 6 {ECO:0000303|PubMed:15135060} Short=PPase 6 {ECO:0000303|PubMed:15135060} Flags: Precursor	-	2546.8	2750.5	2697.1	2668	2609.5	2772.6	0.993081	0.822916	-0.0100169	Nonsignificant	None	4	Molecular Function:magnesium ion binding (GO:0000287),Molecular Function:inorganic diphosphatase activity (GO:0004427),Cellular Component:cytoplasm (GO:0005737),Biological Process:phosphate-containing compound metabolic process (GO:0006796)	inorganic pyrophosphatase	3.6.1.1	ko00190 Oxidative phosphorylation	Inorganic pyrophosphatase	CP	Energy production and conversion ; Inorganic ion transport and metabolism ;
TRINITY_DN201923_c2_g1	FTSH2_ORYSJ, RecName: Full=ATP-dependent zinc metalloprotease FTSH 2, chloroplastic Short=OsFTSH2 EC=3.4.24.- Flags: Precursor	-	2102.4	2161.3	2168.4	2196.3	2246.9	2197.6	0.968573	0.0629505	-0.0460672	Nonsignificant	None	3	Molecular Function:metalloendopeptidase activity (GO:0004222),Molecular Function:ATP binding (GO:0005524),Biological Process:proteolysis (GO:0006508)	cell division protease FtsH	3.4.24.-	--	ATP-dependent Zn proteases	O	Posttranslational modification, protein turnover, chaperones ;
TRINITY_DN187928_c0_g1	NDUV1_ARATH, RecName: Full=NADH dehydrogenase [ubiquinone] flavoprotein 1, mitochondrial EC=1.6.5.3 EC=1.6.99.3 Flags: Precursor	-	1837.1	1879.2	1881	1826.1	1930.5	1812	1.00515	0.828831	0.00741641	Nonsignificant	None	--	--	--	--	ko00190 Oxidative phosphorylation ko01100 Metabolic pathways	NADH:ubiquinone oxidoreductase, NADH-binding 51 kD subunit (chain F)	C	Energy production and conversion ;
TRINITY_DN185322_c0_g2	AMPL2_ORYSJ, RecName: Full=Leucine aminopeptidase 2, chloroplastic EC=3.4.11.1 AltName: Full=Leucyl aminopeptidase 2 Short=LAP 2 AltName: Full=Proline aminopeptidase 2 EC=3.4.11.5 AltName: Full=Prolyl aminopeptidase 2 Flags: Precursor	-	1937.7	1853.3	1943.6	1909	1753.6	1802.2	1.04937	0.186213	0.0695242	Nonsignificant	None	7	Molecular Function:aminopeptidase activity (GO:0004177),Cellular Component:intracellular (GO:0005622),Cellular Component:cytoplasm (GO:0005737),Biological Process:proteolysis (GO:0006508),Molecular Function:metalloexopeptidase activity (GO:0008235),Biological Process:protein metabolic process (GO:0019538),Molecular Function:manganese ion binding (GO:0030145)	leucyl aminopeptidase	3.4.11.1	ko00480 Glutathione metabolism ko01100 Metabolic pathways	Leucyl aminopeptidase	E	Amino acid transport and metabolism ;
TRINITY_DN201908_c1_g2	AMPL2_ORYSJ, RecName: Full=Leucine aminopeptidase 2, chloroplastic EC=3.4.11.1 AltName: Full=Leucyl aminopeptidase 2 Short=LAP 2 AltName: Full=Proline aminopeptidase 2 EC=3.4.11.5 AltName: Full=Prolyl aminopeptidase 2 Flags: Precursor	-	277.6	305.4	303.9	262.4	237	253.3	1.17829	0.0199755	0.236696	Nonsignificant	None	7	Molecular Function:aminopeptidase activity (GO:0004177),Cellular Component:intracellular (GO:0005622),Cellular Component:cytoplasm (GO:0005737),Biological Process:proteolysis (GO:0006508),Molecular Function:metalloexopeptidase activity (GO:0008235),Biological Process:protein metabolic process (GO:0019538),Molecular Function:manganese ion binding (GO:0030145)	--	--	--	Leucyl aminopeptidase	E	Amino acid transport and metabolism ;
TRINITY_DN200386_c2_g1	PSBP_SPIOL, RecName: Full=Oxygen-evolving enhancer protein 2, chloroplastic Short=OEE2 AltName: Full=23 kDa subunit of oxygen evolving system of photosystem II AltName: Full=23 kDa thylakoid membrane protein AltName: Full=OEC 23 kDa subunit Flags: Precursor	-	3026	2953.9	2980.6	3143.7	3421	3123.3	0.924907	0.121494	-0.11262	Nonsignificant	None	5	Molecular Function:calcium ion binding (GO:0005509),Cellular Component:photosystem II (GO:0009523),Cellular Component:photosystem II oxygen evolving complex (GO:0009654),Biological Process:photosynthesis (GO:0015979),Cellular Component:extrinsic component of membrane (GO:0019898)	photosystem II oxygen-evolving enhancer protein 2	--	ko00195 Photosynthesis ko01100 Metabolic pathways	--	--	--
TRINITY_DN175031_c2_g1	DHGY_CUCSA, RecName: Full=Glycerate dehydrogenase Short=GDH EC=1.1.1.29 AltName: Full=NADH-dependent hydroxypyruvate reductase Short=HPR	-	465	501	447.9	485.5	637.6	549.8	0.845179	0.180392	-0.242671	Nonsignificant	None	3	Biological Process:metabolic process (GO:0008152),Molecular Function:NAD binding (GO:0051287),Biological Process:oxidation-reduction process (GO:0055114)	hydroxypyruvate reductase 1	--	ko00260 Glycine, serine and threonine metabolism ko00630 Glyoxylate and dicarboxylate metabolism ko01100 Metabolic pathways ko01110 Biosynthesis of secondary metabolites ko01200 Carbon metabolism	Lactate dehydrogenase or related 2-hydroxyacid dehydrogenase	CHR	Energy production and conversion ; Coenzyme transport and metabolism ; General function prediction only ;
TRINITY_DN186711_c0_g1	DAPAT_ORYSJ, RecName: Full=Probable LL-diaminopimelate aminotransferase, chloroplastic Short=DAP-AT Short=DAP-aminotransferase Short=LL-DAP-aminotransferase EC=2.6.1.83 Flags: Precursor	-	2072.6	2154.1	2005.9	1947.2	2767.2	1962.9	0.933401	0.640566	-0.0994307	Nonsignificant	None	4	Biological Process:biosynthetic process (GO:0009058),Biological Process:lysine biosynthetic process via diaminopimelate (GO:0009089),Molecular Function:L,L-diaminopimelate aminotransferase activity (GO:0010285),Molecular Function:pyridoxal phosphate binding (GO:0030170)	LL-diaminopimelate aminotransferase	2.6.1.83	ko00300 Lysine biosynthesis ko01100 Metabolic pathways ko01110 Biosynthesis of secondary metabolites ko01230 Biosynthesis of amino acids	Aspartate/methionine/tyrosine aminotransferase	E	Amino acid transport and metabolism ;
TRINITY_DN179222_c3_g1	HSP81_ORYSJ, RecName: Full=Heat shock protein 81-1 Short=HSP81-1 AltName: Full=Heat shock protein 82	-	454.6	485.1	511.8	538.9	534.3	559	0.889291	0.0499006	-0.169273	Nonsignificant	None	4	Molecular Function:ATP binding (GO:0005524),Biological Process:protein folding (GO:0006457),Biological Process:response to stress (GO:0006950),Molecular Function:unfolded protein binding (GO:0051082)	molecular chaperone HtpG	--	ko04141 Protein processing in endoplasmic reticulum ko04626 Plant-pathogen interaction	Molecular chaperone, HSP90 family	O	Posttranslational modification, protein turnover, chaperones ;
TRINITY_DN175109_c0_g1	ALFP_ORYSJ, RecName: Full=Fructose-bisphosphate aldolase, chloroplastic {ECO:0000305} EC=4.1.2.13 {ECO:0000305} AltName: Full=Chloroplastic aldolase {ECO:0000303|PubMed:8163192} Short=AldP {ECO:0000303|PubMed:8163192} Flags: Precursor	-	647.2	703	598.9	649.4	665.5	757.4	0.940549	0.41486	-0.0884248	Nonsignificant	None	2	Molecular Function:fructose-bisphosphate aldolase activity (GO:0004332),Biological Process:glycolytic process (GO:0006096)	fructose-bisphosphate aldolase, class I	4.1.2.13	ko00010 Glycolysis / Gluconeogenesis ko00030 Pentose phosphate pathway ko00051 Fructose and mannose metabolism ko00710 Carbon fixation in photosynthetic organisms ko01100 Metabolic pathways ko01110 Biosynthesis of secondary metabolites ko01200 Carbon metabolism ko01230 Biosynthesis of amino acids	Fructose-bisphosphate aldolase class 1	G	Carbohydrate transport and metabolism ;
TRINITY_DN195008_c2_g1	G6PIP_ARATH, RecName: Full=Glucose-6-phosphate isomerase 1, chloroplastic Short=GPI 1 EC=5.3.1.9 AltName: Full=Phosphoglucose isomerase 1 Short=PGI 1 AltName: Full=Phosphohexose isomerase Short=PHI Flags: Precursor	-	56.1	59.2	57.1	52	58.1	47	1.09739	0.249035	0.134077	Nonsignificant	None	3	Molecular Function:glucose-6-phosphate isomerase activity (GO:0004347),Biological Process:gluconeogenesis (GO:0006094),Biological Process:glycolytic process (GO:0006096)	glucose-6-phosphate isomerase	5.3.1.9	ko00010 Glycolysis / Gluconeogenesis ko00030 Pentose phosphate pathway ko00500 Starch and sucrose metabolism ko00520 Amino sugar and nucleotide sugar metabolism ko01100 Metabolic pathways ko01110 Biosynthesis of secondary metabolites ko01200 Carbon metabolism	Glucose-6-phosphate isomerase	G	Carbohydrate transport and metabolism ;
TRINITY_DN200168_c3_g1	UGDH4_ORYSJ, RecName: Full=UDP-glucose 6-dehydrogenase 4 Short=UDP-Glc dehydrogenase 4 Short=UDP-GlcDH 4 Short=UDPGDH 4 EC=1.1.1.22 AltName: Full=Os-UGD4	-	2636.5	2031.7	2169.5	2073.2	2177.6	2415.3	1.02574	0.801583	0.0366682	Nonsignificant	None	2	Molecular Function:NAD binding (GO:0051287),Biological Process:oxidation-reduction process (GO:0055114)	UDPglucose 6-dehydrogenase	1.1.1.22	ko00040 Pentose and glucuronate interconversions ko00053 Ascorbate and aldarate metabolism ko00520 Amino sugar and nucleotide sugar metabolism ko01100 Metabolic pathways	UDP-glucose 6-dehydrogenase	M	Cell wall/membrane/envelope biogenesis ;
TRINITY_DN201536_c2_g1	SC31B_ARATH, RecName: Full=Protein transport protein SEC31 homolog B {ECO:0000305} AltName: Full=SEC31-like protein B {ECO:0000305}	-	2094.1	1883.7	2017.3	1909.1	2028.8	1947.4	1.01866	0.639291	0.0266679	Nonsignificant	None	1	Molecular Function:protein binding (GO:0005515)	protein transport protein SEC31	--	ko04141 Protein processing in endoplasmic reticulum	Predicted NTPase, NACHT family domain	T	Signal transduction mechanisms ;
TRINITY_DN201928_c2_g1	TPR1_ORYSJ, RecName: Full=Protein TPR1 {ECO:0000303|PubMed:24336200} AltName: Full=Aberrant spikelet and panicle1-related 2 {ECO:0000303|PubMed:22136599} AltName: Full=Protein ASP1-RELATED 2 {ECO:0000303|PubMed:22136599} Short=OsASPR2 {ECO:0000303|PubMed:22136599} AltName: Full=Topless-related protein 1 {ECO:0000303|PubMed:24336200} AltName: Full=Topless-related protein 2 {ECO:0000303|PubMed:2660…	-	1965.9	1869.5	1937.5	1869.3	1951	1778.5	1.0311	0.382777	0.0441786	Nonsignificant	None	1	Molecular Function:protein binding (GO:0005515)	--	--	--	WD40 repeat	R	General function prediction only ;
TRINITY_DN185500_c0_g1	CAPP1_SORBI, RecName: Full=Phosphoenolpyruvate carboxylase 1 Short=PEPC 1 Short=PEPCase 1 EC=4.1.1.31 AltName: Full=CP21	-	661.1	661.1	676.7	669.3	592.8	728.7	1.00407	0.951751	0.00585801	Nonsignificant	None	3	Biological Process:tricarboxylic acid cycle (GO:0006099),Molecular Function:phosphoenolpyruvate carboxylase activity (GO:0008964),Biological Process:carbon fixation (GO:0015977)	phosphoenolpyruvate carboxylase	4.1.1.31	ko00620 Pyruvate metabolism ko00710 Carbon fixation in photosynthetic organisms ko01100 Metabolic pathways ko01200 Carbon metabolism	Phosphoenolpyruvate carboxylase	C	Energy production and conversion ;
TRINITY_DN185546_c0_g1	IPYR6_ARATH, RecName: Full=Soluble inorganic pyrophosphatase 6, chloroplastic {ECO:0000303|PubMed:15135060} EC=3.6.1.1 {ECO:0000269|PubMed:15135060} AltName: Full=Inorganic pyrophosphatase 6 AltName: Full=Pyrophosphate phospho-hydrolase 6 {ECO:0000303|PubMed:15135060} Short=PPase 6 {ECO:0000303|PubMed:15135060} Flags: Precursor	-	204.9	217.9	211.4	204.6	211.7	231.7	0.978704	0.644451	-0.0310559	Nonsignificant	None	4	Molecular Function:magnesium ion binding (GO:0000287),Molecular Function:inorganic diphosphatase activity (GO:0004427),Cellular Component:cytoplasm (GO:0005737),Biological Process:phosphate-containing compound metabolic process (GO:0006796)	inorganic pyrophosphatase	3.6.1.1	ko00190 Oxidative phosphorylation	Inorganic pyrophosphatase	CP	Energy production and conversion ; Inorganic ion transport and metabolism ;
TRINITY_DN200154_c2_g1	DPE2_ORYSJ, RecName: Full=4-alpha-glucanotransferase DPE2 EC=2.4.1.25 AltName: Full=Amylomaltase AltName: Full=Disproportionating enzyme Short=D-enzyme AltName: Full=Protein DISPROPORTIONATING ENZYME 2	-	2169.2	2196.8	2192.8	2166	2208	1940.8	1.03864	0.430458	0.0546948	Nonsignificant	None	2	Molecular Function:4-alpha-glucanotransferase activity (GO:0004134),Biological Process:carbohydrate metabolic process (GO:0005975)	4-alpha-glucanotransferase	2.4.1.25	ko00500 Starch and sucrose metabolism ko01100 Metabolic pathways	4-alpha-glucanotransferase	G	Carbohydrate transport and metabolism ;
TRINITY_DN200701_c0_g1	AAE16_ARATH, RecName: Full=Probable acyl-activating enzyme 16, chloroplastic EC=6.2.1.- Flags: Precursor	-	414.6	452.6	517.7	440.2	378.1	354.7	1.18065	0.149867	0.239579	Nonsignificant	None	2	Molecular Function:catalytic activity (GO:0003824),Biological Process:metabolic process (GO:0008152)	long-chain acyl-CoA synthetase	6.2.1.3	ko00061 Fatty acid biosynthesis ko00071 Fatty acid degradation ko01100 Metabolic pathways ko01212 Fatty acid metabolism ko04146 Peroxisome	Long-chain acyl-CoA synthetase (AMP-forming)	I	Lipid transport and metabolism ;
TRINITY_DN196357_c4_g1	C74B2_ARATH, RecName: Full=Linolenate hydroperoxide lyase, chloroplastic {ECO:0000305|PubMed:9701595} EC=4.2.99.- {ECO:0000305|PubMed:9701595} AltName: Full=Cytochrome P450 74B2 {ECO:0000305} AltName: Full=Hydroperoxide lyase 1 {ECO:0000303|PubMed:9701595} Flags: Precursor	-	2064.6	2121.6	2144.2	2056.1	2099.2	1974.7	1.03269	0.211016	0.0464096	Nonsignificant	None	4	Molecular Function:monooxygenase activity (GO:0004497),Molecular Function:iron ion binding (GO:0005506),Molecular Function:heme binding (GO:0020037),Biological Process:oxidation-reduction process (GO:0055114)	hydroperoxide lyase	4.1.2.-	ko00592 alpha-Linolenic acid metabolism ko01110 Biosynthesis of secondary metabolites	Cytochrome P450	QV	Secondary metabolites biosynthesis, transport and catabolism ; Defense mechanisms ;
TRINITY_DN189168_c0_g1	HSOP_WHEAT, RecName: Full=Hsp70-Hsp90 organizing protein Short=TaHop	-	315.1	259.4	277.9	267.3	225.5	210.4	1.21217	0.103096	0.277596	Nonsignificant	None	1	Molecular Function:protein binding (GO:0005515)	stress-induced-phosphoprotein 1	--		Tetratricopeptide (TPR) repeat	R	General function prediction only ;
TRINITY_DN191573_c1_g2	IF4A_WHEAT, RecName: Full=Eukaryotic initiation factor 4A Short=eIF-4A EC=3.6.4.13 AltName: Full=ATP-dependent RNA helicase eIF4A	-	3025.7	2927.7	2865.3	2955.4	2869	2860.2	1.01544	0.474015	0.0221066	Nonsignificant	None	2	Molecular Function:nucleic acid binding (GO:0003676),Molecular Function:ATP binding (GO:0005524)	translation initiation factor 4A	--	ko03013 RNA transport	Superfamily II DNA and RNA helicase	L	Replication, recombination and repair ;
TRINITY_DN200987_c2_g2	FENR1_ORYSI, RecName: Full=Ferredoxin--NADP reductase, leaf isozyme 1, chloroplastic Short=FNR EC=1.18.1.2 {ECO:0000250|UniProtKB:Q9FKW6} AltName: Full=Leaf FNR 1 {ECO:0000305} Short=FNR-1 {ECO:0000305} Short=Os-LFNR1 {ECO:0000305} Flags: Precursor	-	2232	2591.3	2318.7	2326.4	2272.7	2687.6	0.980142	0.79041	-0.0289375	Nonsignificant	None	2	Molecular Function:oxidoreductase activity (GO:0016491),Biological Process:oxidation-reduction process (GO:0055114)	ferredoxin--NADP+ reductase	1.18.1.2	ko00195 Photosynthesis ko01100 Metabolic pathways	Sulfite reductase, alpha subunit (flavoprotein)	P	Inorganic ion transport and metabolism ;
TRINITY_DN201536_c1_g1	SC31B_ARATH, RecName: Full=Protein transport protein SEC31 homolog B {ECO:0000305} AltName: Full=SEC31-like protein B {ECO:0000305}	-	43.2	39.9	45.6	37.8	33.4	27.4	1.30527	0.0590694	0.384353	Nonsignificant	None	1	Molecular Function:protein binding (GO:0005515)	protein transport protein SEC31	--	ko04141 Protein processing in endoplasmic reticulum	Predicted NTPase, NACHT family domain	T	Signal transduction mechanisms ;
TRINITY_DN176393_c2_g3	G3PB_ARATH, RecName: Full=Glyceraldehyde-3-phosphate dehydrogenase GAPB, chloroplastic EC=1.2.1.13 AltName: Full=NADP-dependent glyceraldehydephosphate dehydrogenase B Flags: Precursor	-	2152.1	3231.9	2910.7	2716.5	2762	2964.7	0.982412	0.892977	-0.0256001	Nonsignificant	None	1	Biological Process:oxidation-reduction process (GO:0055114)	glyceraldehyde-3-phosphate dehydrogenase (NADP+) (phosphorylating)	1.2.1.13	ko00710 Carbon fixation in photosynthetic organisms ko01100 Metabolic pathways ko01200 Carbon metabolism	Glyceraldehyde-3-phosphate dehydrogenase/erythrose-4-phosphate dehydrogenase	G	Carbohydrate transport and metabolism ;
TRINITY_DN200288_c6_g1	SAHH_WHEAT, RecName: Full=Adenosylhomocysteinase Short=AdoHcyase EC=3.3.1.1 AltName: Full=S-adenosyl-L-homocysteine hydrolase	-	1579	1505.1	1665.5	1619.1	1366.8	1891.9	0.973718	0.809216	-0.0384246	Nonsignificant	None	3	Molecular Function:adenosylhomocysteinase activity (GO:0004013),Biological Process:S-adenosylhomocysteine catabolic process (GO:0019510),Molecular Function:NAD binding (GO:0051287)	adenosylhomocysteinase	3.3.1.1	ko00270 Cysteine and methionine metabolism ko01100 Metabolic pathways	S-adenosylhomocysteine hydrolase	H	Coenzyme transport and metabolism ;
TRINITY_DN193538_c0_g3	FOMT2_WHEAT, RecName: Full=Tricetin 3,4,5-O-trimethyltransferase Short=TaOMT2 EC=2.1.1.169 AltName: Full=Caffeic acid 3-O-methyltransferase Short=TaCM AltName: Full=Flavone O-methyltransferase 2	-	2618.7	1786.8	2110.2	2152.5	2554.5	2435.9	0.912193	0.49649	-0.13259	Nonsignificant	None	3	Molecular Function:methyltransferase activity (GO:0008168),Molecular Function:O-methyltransferase activity (GO:0008171),Molecular Function:protein dimerization activity (GO:0046983)				Ubiquinone/menaquinone biosynthesis C-methylase UbiE	H	Coenzyme transport and metabolism ;
TRINITY_DN199759_c2_g3	SUS1_HORVU, RecName: Full=Sucrose synthase 1 EC=2.4.1.13 AltName: Full=Sucrose-UDP glucosyltransferase 1	-	217.1	204.7	197.9	189	210.7	206.2	1.02278	0.624816	0.0324903	Nonsignificant	None	2	Biological Process:sucrose metabolic process (GO:0005985),Molecular Function:sucrose synthase activity (GO:0016157)	sucrose synthase	2.4.1.13	ko00500 Starch and sucrose metabolism ko01100 Metabolic pathways	Glycosyltransferase involved in cell wall bisynthesis	M	Cell wall/membrane/envelope biogenesis ;
TRINITY_DN192349_c0_g1	RAF1_ORYSJ, RecName: Full=Rubisco accumulation factor 1, chloroplastic Flags: Precursor	-	1583	1584	1588.4	1580.1	1507.3	1785	0.975987	0.685173	-0.0350659	Nonsignificant	None	--	--	--	--	--	--	--	--
TRINITY_DN195910_c0_g1	KPPR_WHEAT, RecName: Full=Phosphoribulokinase, chloroplastic Short=PRK Short=PRKase EC=2.7.1.19 AltName: Full=Phosphopentokinase Flags: Precursor	-	575.1	667.6	595.7	606.5	785.6	661.7	0.895121	0.315827	-0.159845	Nonsignificant	None	--	--	phosphoribulokinase	2.7.1.19	ko00710 Carbon fixation in photosynthetic organisms ko01100 Metabolic pathways ko01200 Carbon metabolism	Uridine kinase	F	Nucleotide transport and metabolism ;
TRINITY_DN195625_c0_g1	MTHR_ORYSJ, RecName: Full=Probable methylenetetrahydrofolate reductase EC=1.5.1.20	-	2121.4	1916.8	1949.3	1876	1860.9	2078	1.02968	0.575768	0.0421994	Nonsignificant	None	3	Molecular Function:methylenetetrahydrofolate reductase (NAD(P)H) activity (GO:0004489),Biological Process:methionine metabolic process (GO:0006555),Biological Process:oxidation-reduction process (GO:0055114)	methylenetetrahydrofolate reductase (NADPH)	1.5.1.20	ko00670 One carbon pool by folate ko01100 Metabolic pathways ko01200 Carbon metabolism	5,10-methylenetetrahydrofolate reductase	E	Amino acid transport and metabolism ;
TRINITY_DN177459_c0_g1	FTSH2_ORYSJ, RecName: Full=ATP-dependent zinc metalloprotease FTSH 2, chloroplastic Short=OsFTSH2 EC=3.4.24.- Flags: Precursor	-	770.5	789.3	836.6	795.5	721.5	789	1.0392	0.384499	0.0554762	Nonsignificant	None	3	Molecular Function:metalloendopeptidase activity (GO:0004222),Molecular Function:ATP binding (GO:0005524),Biological Process:proteolysis (GO:0006508)	cell division protease FtsH	3.4.24.-	--	ATP-dependent Zn proteases	O	Posttranslational modification, protein turnover, chaperones ;
TRINITY_DN198335_c1_g1	TOC75_ORYSJ, RecName: Full=Protein TOC75, chloroplastic AltName: Full=75 kDa translocon at the outer-envelope-membrane of chloroplasts Flags: Precursor	-	1965.4	1938.8	2066.8	1997.2	1962.2	1905.9	1.01802	0.502028	0.0257677	Nonsignificant	None	3	Biological Process:intracellular protein transport (GO:0006886),Molecular Function:P-P-bond-hydrolysis-driven protein transmembrane transporter activity (GO:0015450),Cellular Component:outer membrane (GO:0019867)	--	--	--	Outer membrane protein assembly factor BamA	M	Cell wall/membrane/envelope biogenesis ;
TRINITY_DN197240_c0_g1	--	-	1522.6	1684.9	1557.2	1593.1	1571.5	1669.2	0.985705	0.713747	-0.0207724	Nonsignificant	None	--	--	--	--	--	Uncharacterized conserved protein YbjT, contains NAD(P)-binding and DUF2867 domains	R	General function prediction only ;
TRINITY_DN189390_c2_g1	DAPAT_ORYSJ, RecName: Full=Probable LL-diaminopimelate aminotransferase, chloroplastic Short=DAP-AT Short=DAP-aminotransferase Short=LL-DAP-aminotransferase EC=2.6.1.83 Flags: Precursor	-	66.4	67.1	54.9	68.8	72.7	59.8	0.935917	0.477947	-0.0955482	Nonsignificant	None	4	Biological Process:biosynthetic process (GO:0009058),Biological Process:lysine biosynthetic process via diaminopimelate (GO:0009089),Molecular Function:L,L-diaminopimelate aminotransferase activity (GO:0010285),Molecular Function:pyridoxal phosphate binding (GO:0030170)	LL-diaminopimelate aminotransferase	2.6.1.83	ko00300 Lysine biosynthesis ko01100 Metabolic pathways ko01110 Biosynthesis of secondary metabolites ko01230 Biosynthesis of amino acids	Aspartate/methionine/tyrosine aminotransferase	E	Amino acid transport and metabolism ;
TRINITY_DN172905_c0_g2	KPPR_WHEAT, RecName: Full=Phosphoribulokinase, chloroplastic Short=PRK Short=PRKase EC=2.7.1.19 AltName: Full=Phosphopentokinase Flags: Precursor	-	3896.2	4251	3797.5	3942.9	4033.4	4438.3	0.962149	0.488458	-0.0556672	Nonsignificant	None	5	Molecular Function:ATP binding (GO:0005524),Biological Process:carbohydrate metabolic process (GO:0005975),Biological Process:metabolic process (GO:0008152),Molecular Function:phosphoribulokinase activity (GO:0008974),Molecular Function:kinase activity (GO:0016301)	phosphoribulokinase	2.7.1.19	ko00710 Carbon fixation in photosynthetic organisms ko01100 Metabolic pathways ko01200 Carbon metabolism	Uridine kinase	F	Nucleotide transport and metabolism ;
TRINITY_DN170319_c0_g1	PSBO_TOBAC, RecName: Full=Oxygen-evolving enhancer protein 1, chloroplastic Short=OEE1 AltName: Full=33 kDa subunit of oxygen evolving system of photosystem II AltName: Full=33 kDa thylakoid membrane protein AltName: Full=OEC 33 kDa subunit Flags: Precursor	-	1438.9	1520.1	1485.8	2007.8	1568.4	1522.7	0.871717	0.292933	-0.198068	Nonsignificant	None	6	Molecular Function:calcium ion binding (GO:0005509),Cellular Component:photosystem II (GO:0009523),Cellular Component:photosystem II oxygen evolving complex (GO:0009654),Biological Process:photosynthesis (GO:0015979),Cellular Component:extrinsic component of membrane (GO:0019898),Biological Process:photosystem II stabilization (GO:0042549)	--	--	--	--	--	--
TRINITY_DN190963_c0_g1	SCRK1_ORYSJ, RecName: Full=Fructokinase-1 {ECO:0000305} EC=2.7.1.4 {ECO:0000269|PubMed:12475618} AltName: Full=Fructokinase I {ECO:0000303|PubMed:12475618} AltName: Full=OsFKI {ECO:0000303|PubMed:12475618}	-	1978.7	1845	1941.9	1641.9	1969.7	1727.7	1.07984	0.283409	0.11082	Nonsignificant	None	2	Molecular Function:ribokinase activity (GO:0004747),Biological Process:D-ribose metabolic process (GO:0006014)	fructokinase	2.7.1.4	ko00051 Fructose and mannose metabolism ko00500 Starch and sucrose metabolism ko00520 Amino sugar and nucleotide sugar metabolism ko01100 Metabolic pathways	Sugar or nucleoside kinase, ribokinase family	G	Carbohydrate transport and metabolism ;
TRINITY_DN188389_c1_g1	--	-	270.8	273.5	235.6	209.5	237.4	237.4	1.1397	0.111358	0.18866	Nonsignificant	None	4	Molecular Function:sedoheptulose-7-phosphate:D-glyceraldehyde-3-phosphate glyceronetransferase activity (GO:0004801),Cellular Component:cytoplasm (GO:0005737),Biological Process:carbohydrate metabolic process (GO:0005975),Biological Process:pentose-phosphate shunt (GO:0006098)	transaldolase	2.2.1.2	ko00030 Pentose phosphate pathway ko01100 Metabolic pathways ko01110 Biosynthesis of secondary metabolites ko01200 Carbon metabolism ko01230 Biosynthesis of amino acids	Transaldolase	G	Carbohydrate transport and metabolism ;
TRINITY_DN196842_c3_g2	APX1_ORYSJ, RecName: Full=L-ascorbate peroxidase 1, cytosolic {ECO:0000305} Short=APXa {ECO:0000303|Ref.1} EC=1.11.1.11 {ECO:0000269|PubMed:15685422} AltName: Full=OsAPx1 {ECO:0000303|PubMed:15599508}	-	2737.6	2516	2623.7	2614	2751.2	2818.7	0.962536	0.309641	-0.0550873	Nonsignificant	None	4	Molecular Function:peroxidase activity (GO:0004601),Biological Process:response to oxidative stress (GO:0006979),Molecular Function:heme binding (GO:0020037),Biological Process:oxidation-reduction process (GO:0055114)	L-ascorbate peroxidase	1.11.1.11	ko00053 Ascorbate and aldarate metabolism ko00480 Glutathione metabolism	Catalase (peroxidase I)	P	Inorganic ion transport and metabolism ;
TRINITY_DN194680_c0_g1	CATA2_ORYSI, RecName: Full=Catalase isozyme B Short=CAT-B EC=1.11.1.6	-	1428.3	1422.4	1470.7	1285.2	1159.3	1096.7	1.22032	0.0348703	0.28726	Significant	up	4	Molecular Function:catalase activity (GO:0004096),Biological Process:response to oxidative stress (GO:0006979),Molecular Function:heme binding (GO:0020037),Biological Process:oxidation-reduction process (GO:0055114)	catalase	1.11.1.6	ko00380 Tryptophan metabolism ko00630 Glyoxylate and dicarboxylate metabolism ko01110 Biosynthesis of secondary metabolites ko01200 Carbon metabolism ko04016 MAPK signaling pathway - plant ko04146 Peroxisome	Catalase	P	Inorganic ion transport and metabolism ;
TRINITY_DN180151_c1_g1	G3PA_SPIOL, RecName: Full=Glyceraldehyde-3-phosphate dehydrogenase A, chloroplastic EC=1.2.1.13 AltName: Full=NADP-dependent glyceraldehydephosphate dehydrogenase subunit A Flags: Precursor	-	335	400.1	375.3	352.4	352.5	390.6	1.0136	0.839928	0.01949	Nonsignificant	None	1	Biological Process:oxidation-reduction process (GO:0055114)	--	--	--	Glyceraldehyde-3-phosphate dehydrogenase/erythrose-4-phosphate dehydrogenase	G	Carbohydrate transport and metabolism ;
TRINITY_DN175784_c0_g3	THI42_VITVI, RecName: Full=Thiamine thiazole synthase 2, chloroplastic {ECO:0000255|HAMAP-Rule:MF_03158} AltName: Full=Thiazole biosynthetic enzyme 2 {ECO:0000255|HAMAP-Rule:MF_03158} Flags: Precursor	-	2173.7	2222.1	2092.1	2159	2413.8	2588.7	0.905941	0.207446	-0.14251	Nonsignificant	None	--	--	thiamine thiazole synthase	--	ko00730 Thiamine metabolism ko01100 Metabolic pathways	Archaeal ribulose 1,5-bisphosphate synthetase/yeast thiazole synthase	H	Coenzyme transport and metabolism ;
TRINITY_DN200411_c1_g2	CHLH_ORYSI, RecName: Full=Magnesium-chelatase subunit ChlH, chloroplastic Short=Mg-chelatase subunit H EC=6.6.1.1 AltName: Full=Mg-protoporphyrin IX chelatase subunit ChlH Flags: Precursor	-	1600.5	1539.6	1543.9	1592.3	1552.9	1627.4	0.981436	0.368328	-0.0270344	Nonsignificant	None	2	Biological Process:biosynthetic process (GO:0009058),Molecular Function:magnesium chelatase activity (GO:0016851)	magnesium chelatase subunit H	6.6.1.1	ko00860 Porphyrin and chlorophyll metabolism ko01100 Metabolic pathways ko01110 Biosynthesis of secondary metabolites	Cobalamin biosynthesis protein CobN, Mg-chelatase	H	Coenzyme transport and metabolism ;
TRINITY_DN182346_c0_g1	LOXC2_ORYSJ, RecName: Full=Probable lipoxygenase 8, chloroplastic EC=1.13.11.12 Flags: Precursor	-	1844.2	1410.3	1873.2	1534.3	1800.6	1319.3	1.10174	0.483351	0.139779	Nonsignificant	None	3	Molecular Function:oxidoreductase activity (GO:0016491),Molecular Function:metal ion binding (GO:0046872),Biological Process:oxidation-reduction process (GO:0055114)	lipoxygenase	1.13.11.12	ko00591 Linoleic acid metabolism ko00592 alpha-Linolenic acid metabolism ko01100 Metabolic pathways ko01110 Biosynthesis of secondary metabolites	Catalase	P	Inorganic ion transport and metabolism ;
TRINITY_DN194124_c0_g1	CATA2_ORYSJ, RecName: Full=Catalase isozyme B Short=CAT-B EC=1.11.1.6	-	39	40.4	39	35.3	38.2	30.8	1.13519	0.155451	0.18293	Nonsignificant	None	4	Molecular Function:catalase activity (GO:0004096),Biological Process:response to oxidative stress (GO:0006979),Molecular Function:heme binding (GO:0020037),Biological Process:oxidation-reduction process (GO:0055114)	catalase	1.11.1.6	ko00380 Tryptophan metabolism ko00630 Glyoxylate and dicarboxylate metabolism ko01110 Biosynthesis of secondary metabolites ko01200 Carbon metabolism ko04016 MAPK signaling pathway - plant ko04146 Peroxisome	Catalase	P	Inorganic ion transport and metabolism ;
TRINITY_DN177451_c1_g2	CATA1_WHEAT, RecName: Full=Catalase-1 EC=1.11.1.6	-	544.6	572.9	579.7	603.7	561.4	642.9	0.938717	0.254822	-0.0912381	Nonsignificant	None	4	Molecular Function:catalase activity (GO:0004096),Biological Process:response to oxidative stress (GO:0006979),Molecular Function:heme binding (GO:0020037),Biological Process:oxidation-reduction process (GO:0055114)	catalase	1.11.1.6	ko00380 Tryptophan metabolism ko00630 Glyoxylate and dicarboxylate metabolism ko01110 Biosynthesis of secondary metabolites ko01200 Carbon metabolism ko04016 MAPK signaling pathway - plant ko04146 Peroxisome	Catalase	P	Inorganic ion transport and metabolism ;
TRINITY_DN191886_c1_g2	IF4A1_ORYSJ, RecName: Full=Eukaryotic initiation factor 4A-1 Short=eIF-4A-1 EC=3.6.4.13 AltName: Full=ATP-dependent RNA helicase eIF4A-1 AltName: Full=DEAD-box ATP-dependent RNA helicase 4	-	133	115.7	118.4	119.5	130.9	100.8	1.04527	0.638862	0.0638803	Nonsignificant	None	2	Molecular Function:nucleic acid binding (GO:0003676),Molecular Function:ATP binding (GO:0005524)	translation initiation factor 4A	--	ko03013 RNA transport	Superfamily II DNA and RNA helicase	L	Replication, recombination and repair ;
TRINITY_DN176061_c0_g1	FUM2_ARATH, RecName: Full=Fumarate hydratase 2, chloroplastic Short=Fumarase 2 EC=4.2.1.2 Flags: Precursor	-	1920	1942.8	1951.1	1850.4	1963.3	1717.4	1.05113	0.315277	0.0719398	Nonsignificant	None	5	Molecular Function:fumarate hydratase activity (GO:0004333),Biological Process:tricarboxylic acid cycle (GO:0006099),Biological Process:fumarate metabolic process (GO:0006106),Molecular Function:lyase activity (GO:0016829),Cellular Component:tricarboxylic acid cycle enzyme complex (GO:0045239)	fumarate hydratase, class II	4.2.1.2	ko00020 Citrate cycle (TCA cycle) ko00620 Pyruvate metabolism ko01100 Metabolic pathways ko01110 Biosynthesis of secondary metabolites ko01200 Carbon metabolism	Fumarate hydratase class II	C	Energy production and conversion ;
TRINITY_DN200873_c1_g3	TSN1_ARATH, RecName: Full=Ribonuclease TUDOR 1 {ECO:0000303|PubMed:20396901} Short=AtTudor1 {ECO:0000303|PubMed:20396901} Short=TUDOR-SN protein 1 {ECO:0000303|PubMed:20396901} EC=3.1.-.- {ECO:0000269|PubMed:25736060}	-	1676.2	1498.6	1640.1	1523.5	1592.7	1544.4	1.03311	0.450117	0.0469901	Nonsignificant	None	--	--	staphylococcal nuclease domain-containing protein 1	--		--	--	--
TRINITY_DN200493_c1_g1	TSN1_ARATH, RecName: Full=Ribonuclease TUDOR 1 {ECO:0000303|PubMed:20396901} Short=AtTudor1 {ECO:0000303|PubMed:20396901} Short=TUDOR-SN protein 1 {ECO:0000303|PubMed:20396901} EC=3.1.-.- {ECO:0000269|PubMed:25736060}	-	757.7	761.2	795.9	764.2	759.2	708.6	1.0371	0.277531	0.0525505	Nonsignificant	None	--	--	staphylococcal nuclease domain-containing protein 1	--		--	--	--
TRINITY_DN176108_c2_g1	EF2_BETVU, RecName: Full=Elongation factor 2 Short=EF-2	-	1959.7	1860.3	1954.3	2039.8	1943.7	1960.8	0.971401	0.265774	-0.0418609	Nonsignificant	None	1	Molecular Function:GTP binding (GO:0005525)	elongation factor 2	--		Translation elongation factor EF-G, a GTPase	J	Translation, ribosomal structure and biogenesis ;
TRINITY_DN188390_c0_g1	--	-	2665.9	2784.9	2693.3	2729.1	2613.8	2481.7	1.04083	0.276652	0.0577383	Nonsignificant	None	4	Molecular Function:sedoheptulose-7-phosphate:D-glyceraldehyde-3-phosphate glyceronetransferase activity (GO:0004801),Cellular Component:cytoplasm (GO:0005737),Biological Process:carbohydrate metabolic process (GO:0005975),Biological Process:pentose-phosphate shunt (GO:0006098)	transaldolase	2.2.1.2	ko00030 Pentose phosphate pathway ko01100 Metabolic pathways ko01110 Biosynthesis of secondary metabolites ko01200 Carbon metabolism ko01230 Biosynthesis of amino acids	Transaldolase	G	Carbohydrate transport and metabolism ;
TRINITY_DN195816_c1_g1	PAP6_ARATH, RecName: Full=Plastid-lipid-associated protein 6, chloroplastic {ECO:0000303|PubMed:16850419} AltName: Full=Fibrillin-4 {ECO:0000303|PubMed:16461379} AltName: Full=Fibrillin-6 {ECO:0000303|PubMed:18455927} AltName: Full=Harpin-binding protein 1 {ECO:0000303|Ref.1} Short=HrBP1 {ECO:0000303|Ref.1} AltName: Full=Plastoglobulin 30.4 {ECO:0000303|PubMed:16414959} Short=AtPGL30.4 {ECO:00003…	-	1882.2	2171.8	2059.8	1851.5	1767.1	1493.5	1.19595	0.0752503	0.258153	Nonsignificant	None	--	--	--	--	--	--	--	--
TRINITY_DN194992_c4_g1	RBL_HYOLA, RecName: Full=Ribulose bisphosphate carboxylase large chain {ECO:0000255|HAMAP-Rule:MF_01338} Short=RuBisCO large subunit {ECO:0000255|HAMAP-Rule:MF_01338} EC=4.1.1.39 {ECO:0000255|HAMAP-Rule:MF_01338} Flags: Precursor	-	214.6	241.3	289.2	2953.3	382.9	235.1	0.208636	0.397519	-2.26094	Nonsignificant	None	1	Molecular Function:magnesium ion binding (GO:0000287)	ribulose-bisphosphate carboxylase large chain	4.1.1.39	ko00630 Glyoxylate and dicarboxylate metabolism ko00710 Carbon fixation in photosynthetic organisms ko01100 Metabolic pathways ko01200 Carbon metabolism	Ribulose 1,5-bisphosphate carboxylase, large subunit, or a RuBisCO-like protein	G	Carbohydrate transport and metabolism ;
TRINITY_DN175791_c2_g4	RCAB_HORVU, RecName: Full=Ribulose bisphosphate carboxylase/oxygenase activase B, chloroplastic Short=RA B Short=RuBisCO activase B Flags: Precursor	-	87.3	112.1	100.2	114.9	85.1	81.7	1.06354	0.667214	0.0888781	Nonsignificant	None	--	--	--	--	--	ATP-dependent 26S proteasome regulatory subunit	O	Posttranslational modification, protein turnover, chaperones ;
TRINITY_DN193057_c2_g2	LGUL_ORYSJ, RecName: Full=Lactoylglutathione lyase EC=4.4.1.5 {ECO:0000269|PubMed:11139585} AltName: Full=Aldoketomutase AltName: Full=Allergen Glb33 AltName: Full=Glyoxalase I Short=Glx I AltName: Full=Glyoxylase I 11 {ECO:0000305} Short=OsGLYI-11 {ECO:0000303|PubMed:24661284} Short=OsGLYI11 {ECO:0000303|PubMed:21213008} AltName: Full=Ketone-aldehyde mutase AltName: Full=Methylglyoxalase AltName…	-	2781.4	2806.7	2850.8	2969.3	2770.3	2646.6	1.00628	0.870606	0.00903772	Nonsignificant	None	--	--	lactoylglutathione lyase	4.4.1.5	ko00620 Pyruvate metabolism	Catechol 2,3-dioxygenase or other lactoylglutathione lyase family enzyme	Q	Secondary metabolites biosynthesis, transport and catabolism ;
TRINITY_DN200635_c1_g1	CHLH_ORYSI, RecName: Full=Magnesium-chelatase subunit ChlH, chloroplastic Short=Mg-chelatase subunit H EC=6.6.1.1 AltName: Full=Mg-protoporphyrin IX chelatase subunit ChlH Flags: Precursor	-	27.8	22.9	26.1	28.9	27.8	32.9	0.857143	0.113988	-0.222392	Nonsignificant	None	2	Biological Process:biosynthetic process (GO:0009058),Molecular Function:magnesium chelatase activity (GO:0016851)	magnesium chelatase subunit H	6.6.1.1	ko00860 Porphyrin and chlorophyll metabolism ko01100 Metabolic pathways ko01110 Biosynthesis of secondary metabolites	Cobalamin biosynthesis protein CobN, Mg-chelatase	H	Coenzyme transport and metabolism ;
TRINITY_DN197429_c3_g1	MD37C_ARATH, RecName: Full=Probable mediator of RNA polymerase II transcription subunit 37c AltName: Full=Heat shock 70 kDa protein 4 AltName: Full=Heat shock cognate 70 kDa protein 4 AltName: Full=Heat shock cognate protein 70-4 Short=AtHsc70-4 AltName: Full=Heat shock protein 70-4 Short=AtHsp70-4	-	1267.6	1199	1106.7	1258.2	1157.4	1018.3	1.0406	0.612469	0.057409	Nonsignificant	None	--	--	heat shock 70kDa protein 1/2/6/8	--	ko03040 Spliceosome ko04141 Protein processing in endoplasmic reticulum ko04144 Endocytosis	Molecular chaperone DnaK (HSP70)	O	Posttranslational modification, protein turnover, chaperones ;
TRINITY_DN194762_c1_g2	EF1G2_ORYSJ, RecName: Full=Elongation factor 1-gamma 2 Short=EF-1-gamma 2 AltName: Full=eEF-1B gamma 2	-	2520.6	2436.4	2428.1	2470.4	2360.2	2341.6	1.02968	0.233939	0.0422017	Nonsignificant	None	2	Molecular Function:translation elongation factor activity (GO:0003746),Biological Process:translational elongation (GO:0006414)	elongation factor 1-gamma	--		--	--	--
TRINITY_DN172836_c2_g2	EFTU_ARATH, RecName: Full=Elongation factor Tu, chloroplastic Short=EF-Tu AltName: Full=Ras-related protein RABE1b Short=AtRABE1b AltName: Full=Ras-related protein Rab8D Short=AtRab8D Flags: Precursor	-	1071.9	1116.6	1092	1208	1249.9	1215.1	0.893139	0.00202284	-0.163043	Nonsignificant	None	1	Molecular Function:GTP binding (GO:0005525)	elongation factor Tu	--	--	Translation elongation factor EF-Tu, a GTPase	J	Translation, ribosomal structure and biogenesis ;
TRINITY_DN190032_c1_g1	AATC_ORYSJ, RecName: Full=Aspartate aminotransferase, cytoplasmic EC=2.6.1.1 AltName: Full=Transaminase A	-	2179.6	2080.1	2128.1	2022.5	2152.5	2085.3	1.02037	0.422634	0.0290873	Nonsignificant	None	4	Biological Process:cellular amino acid metabolic process (GO:0006520),Molecular Function:transaminase activity (GO:0008483),Biological Process:biosynthetic process (GO:0009058),Molecular Function:pyridoxal phosphate binding (GO:0030170)	aspartate aminotransferase, cytoplasmic	2.6.1.1	ko00220 Arginine biosynthesis ko00250 Alanine, aspartate and glutamate metabolism ko00270 Cysteine and methionine metabolism ko00330 Arginine and proline metabolism ko00350 Tyrosine metabolism ko00360 Phenylalanine metabolism ko00400 Phenylalanine, tyrosine and tryptophan biosynthesis ko00710 Carbon fixation in photosynthetic organisms ko00950 Isoquinoline alkaloid biosynthesis ko00960 Tropane, p…	Aspartate/tyrosine/aromatic aminotransferase	E	Amino acid transport and metabolism ;
TRINITY_DN188297_c2_g1	ADT_ORYSJ, RecName: Full=ADP,ATP carrier protein, mitochondrial AltName: Full=ADP/ATP translocase AltName: Full=Adenine nucleotide translocator Short=ANT Flags: Precursor	-	3286.8	3108.4	3324.4	3103.7	3235.8	2836.1	1.05929	0.267813	0.0830944	Nonsignificant	None	4	Molecular Function:transporter activity (GO:0005215),Cellular Component:mitochondrial inner membrane (GO:0005743),Biological Process:transport (GO:0006810),Biological Process:transmembrane transport (GO:0055085)	solute carrier family 25 (mitochondrial adenine nucleotide translocator), member 4/5/6/31	--		--	--	--
TRINITY_DN198364_c0_g1	CCD_CROSA, RecName: Full=Carotenoid 9,10(9,10)-cleavage dioxygenase EC=1.14.99.n4 AltName: Full=CsCCD	-	1636.3	1590.3	1813.6	1635.1	1693.5	1878.6	0.967929	0.607951	-0.0470268	Nonsignificant	None	1	Biological Process:oxidation-reduction process (GO:0055114)				Carotenoid cleavage dioxygenase or a related enzyme	Q	Secondary metabolites biosynthesis, transport and catabolism ;
TRINITY_DN201369_c1_g4	TI110_ARATH, RecName: Full=Protein TIC110, chloroplastic AltName: Full=Translocon at the inner envelope membrane of chloroplasts 110 Short=AtTIC110 Flags: Precursor	-	2402.4	2425	2321.2	2287.1	2364.2	2892.2	0.94765	0.561929	-0.0775733	Nonsignificant	None	1	Cellular Component:chloroplast (GO:0009507)	--	--	--	--	--	--
TRINITY_DN181318_c3_g4	ENO2_MAIZE, RecName: Full=Enolase 2 EC=4.2.1.11 AltName: Full=2-phospho-D-glycerate hydro-lyase 2 AltName: Full=2-phosphoglycerate dehydratase 2	-	542.2	603.8	596.3	623.9	559.9	553.7	1.00276	0.959624	0.00398008	Nonsignificant	None	4	Cellular Component:phosphopyruvate hydratase complex (GO:0000015),Molecular Function:magnesium ion binding (GO:0000287),Molecular Function:phosphopyruvate hydratase activity (GO:0004634),Biological Process:glycolytic process (GO:0006096)	enolase	4.2.1.11	ko00010 Glycolysis / Gluconeogenesis ko01100 Metabolic pathways ko01110 Biosynthesis of secondary metabolites ko01200 Carbon metabolism ko01230 Biosynthesis of amino acids ko03018 RNA degradation	Enolase	G	Carbohydrate transport and metabolism ;
TRINITY_DN186294_c2_g3	EBP1_SOLTU, RecName: Full=ERBB-3 BINDING PROTEIN 1 {ECO:0000303|PubMed:17024182} Short=StEBP1 {ECO:0000303|PubMed:17024182}	-	2131.9	2009.5	2061.1	1996.3	1973	1972.6	1.04386	0.12812	0.0619255	Nonsignificant	None	--	--	--	--	--	Methionine aminopeptidase	J	Translation, ribosomal structure and biogenesis ;
TRINITY_DN200453_c0_g1	CP41A_ARATH, RecName: Full=Chloroplast stem-loop binding protein of 41 kDa a, chloroplastic Short=CSP41-a Flags: Precursor	-	1547.1	1652.6	1211	1497.9	1566.9	1727.1	0.920449	0.45818	-0.11959	Nonsignificant	None	--	--	--	--	--	Nucleoside-diphosphate-sugar epimerase	M	Cell wall/membrane/envelope biogenesis ;
TRINITY_DN197100_c5_g1	PTA16_ARATH, RecName: Full=Protein plastid transcriptionally active 16, chloroplastic {ECO:0000303|PubMed:16326926} Short=pTAC16 {ECO:0000303|PubMed:16326926} Flags: Precursor	-	287.2	268.6	272.7	261.4	256.7	287.1	1.02894	0.527374	0.0411545	Nonsignificant	None	--	--	--	--	--	Nucleoside-diphosphate-sugar epimerase	M	Cell wall/membrane/envelope biogenesis ;
TRINITY_DN201910_c2_g2	F26_ARATH, RecName: Full=6-phosphofructo-2-kinase/fructose-2,6-bisphosphatase Short=6PF-2-K/Fru-2,6-P2ase Short=AtF2KP Short=PFK/FBPase Includes: RecName: Full=6-phosphofructo-2-kinase EC=2.7.1.105 Includes: RecName: Full=Fructose-2,6-bisphosphatase EC=3.1.3.46	-	1355.3	1263.7	1233	1201.9	1368.5	1458.2	0.956163	0.533558	-0.0646709	Nonsignificant	None	6	Molecular Function:catalytic activity (GO:0003824),Molecular Function:6-phosphofructo-2-kinase activity (GO:0003873),Molecular Function:ATP binding (GO:0005524),Biological Process:fructose metabolic process (GO:0006000),Biological Process:fructose 2,6-bisphosphate metabolic process (GO:0006003),Molecular Function:starch binding (GO:2001070)	--	--	ko00051 Fructose and mannose metabolism	Shikimate kinase	E	Amino acid transport and metabolism ;
TRINITY_DN192820_c1_g2	CH61_MAIZE, RecName: Full=Chaperonin CPN60-1, mitochondrial AltName: Full=HSP60-1 Flags: Precursor	-	1055.8	1022.1	951.1	944.2	907.3	945.6	1.08291	0.114806	0.11491	Nonsignificant	None	3	Molecular Function:ATP binding (GO:0005524),Cellular Component:cytoplasm (GO:0005737),Biological Process:protein refolding (GO:0042026)	chaperonin GroEL	--	ko03018 RNA degradation	Chaperonin GroEL (HSP60 family)	O	Posttranslational modification, protein turnover, chaperones ;
TRINITY_DN201939_c2_g2	PSBQ1_MAIZE, RecName: Full=Oxygen-evolving enhancer protein 3-1, chloroplastic Short=OEE3 AltName: Full=16 kDa subunit of oxygen evolving system of photosystem II AltName: Full=OEC 16 kDa subunit Flags: Precursor	-	1783.9	1847.5	1907.7	1813.1	1890.5	1889.3	0.990381	0.706281	-0.013945	Nonsignificant	None	5	Molecular Function:calcium ion binding (GO:0005509),Cellular Component:photosystem II (GO:0009523),Cellular Component:photosystem II oxygen evolving complex (GO:0009654),Biological Process:photosynthesis (GO:0015979),Cellular Component:extrinsic component of membrane (GO:0019898)	photosystem II oxygen-evolving enhancer protein 3	--	ko00195 Photosynthesis ko01100 Metabolic pathways	--	--	--
TRINITY_DN200246_c1_g1	CHLI_ORYSJ, RecName: Full=Magnesium-chelatase subunit ChlI, chloroplastic Short=Mg-chelatase subunit I EC=6.6.1.1 AltName: Full=Mg-protoporphyrin IX chelatase subunit ChlI AltName: Full=Protein CHLORINA 9 Flags: Precursor	-	1646.8	1577.1	1614.2	1673.5	1555	1811.9	0.959864	0.462747	-0.0590976	Nonsignificant	None	--	--	magnesium chelatase subunit I	6.6.1.1	ko00860 Porphyrin and chlorophyll metabolism ko01100 Metabolic pathways ko01110 Biosynthesis of secondary metabolites	Mg-chelatase subunit ChlI	H	Coenzyme transport and metabolism ;
TRINITY_DN201264_c1_g1	NPP_HORVU, RecName: Full=Nucleotide pyrophosphatase/phosphodiesterase EC=3.-.-.- Flags: Fragments	-	2426.9	2334.3	2377.4	2080.5	2288	2100.8	1.10346	0.0617899	0.142032	Nonsignificant	None	1	Molecular Function:hydrolase activity (GO:0016787)				3',5'-cyclic AMP phosphodiesterase CpdA	T	Signal transduction mechanisms ;
TRINITY_DN201318_c2_g1	CYSK1_ORYSJ, RecName: Full=Cysteine synthase Short=CSase EC=2.5.1.47 AltName: Full=O-acetylserine (thiol)-lyase Short=OAS-TL AltName: Full=O-acetylserine sulfhydrylase	-	702.3	659.4	669.4	679.6	613.9	691.8	1.02307	0.616099	0.0329042	Nonsignificant	None	--	--	cysteine synthase A	2.5.1.47	ko00270 Cysteine and methionine metabolism ko00920 Sulfur metabolism ko01100 Metabolic pathways ko01110 Biosynthesis of secondary metabolites ko01200 Carbon metabolism ko01230 Biosynthesis of amino acids	Cysteine synthase	E	Amino acid transport and metabolism ;
TRINITY_DN201196_c2_g5	ENO_ORYSJ, RecName: Full=Enolase EC=4.2.1.11 AltName: Full=2-phospho-D-glycerate hydro-lyase AltName: Full=2-phosphoglycerate dehydratase AltName: Full=OSE1	-	332.8	329.3	304.3	357.9	351.3	326.6	0.932999	0.152108	-0.100053	Nonsignificant	None	4	Cellular Component:phosphopyruvate hydratase complex (GO:0000015),Molecular Function:magnesium ion binding (GO:0000287),Molecular Function:phosphopyruvate hydratase activity (GO:0004634),Biological Process:glycolytic process (GO:0006096)	enolase	4.2.1.11	ko00010 Glycolysis / Gluconeogenesis ko01100 Metabolic pathways ko01110 Biosynthesis of secondary metabolites ko01200 Carbon metabolism ko01230 Biosynthesis of amino acids ko03018 RNA degradation	Enolase	G	Carbohydrate transport and metabolism ;
TRINITY_DN176294_c0_g1	FENR1_ORYSI, RecName: Full=Ferredoxin--NADP reductase, leaf isozyme 1, chloroplastic Short=FNR EC=1.18.1.2 {ECO:0000250|UniProtKB:Q9FKW6} AltName: Full=Leaf FNR 1 {ECO:0000305} Short=FNR-1 {ECO:0000305} Short=Os-LFNR1 {ECO:0000305} Flags: Precursor	-	344.2	389.2	371	360.3	409.1	370.2	0.969112	0.586104	-0.0452647	Nonsignificant	None	2	Molecular Function:oxidoreductase activity (GO:0016491),Biological Process:oxidation-reduction process (GO:0055114)	ferredoxin--NADP+ reductase	1.18.1.2	ko00195 Photosynthesis ko01100 Metabolic pathways	Sulfite reductase, alpha subunit (flavoprotein)	P	Inorganic ion transport and metabolism ;
TRINITY_DN201759_c1_g1	METE2_ORYSJ, RecName: Full=5-methyltetrahydropteroyltriglutamate--homocysteine methyltransferase 2 EC=2.1.1.14 AltName: Full=Cobalamin-independent methionine synthase 2	-	563.6	483.3	510.9	457.6	486.7	527.2	1.05865	0.407355	0.0822225	Nonsignificant	None	3	Molecular Function:5-methyltetrahydropteroyltriglutamate-homocysteine S-methyltransferase activity (GO:0003871),Molecular Function:zinc ion binding (GO:0008270),Biological Process:cellular amino acid biosynthetic process (GO:0008652)	5-methyltetrahydropteroyltriglutamate--homocysteine methyltransferase	2.1.1.14	ko00270 Cysteine and methionine metabolism ko00450 Selenocompound metabolism ko01100 Metabolic pathways ko01110 Biosynthesis of secondary metabolites ko01230 Biosynthesis of amino acids	Methionine synthase II (cobalamin-independent)	E	Amino acid transport and metabolism ;
TRINITY_DN194854_c0_g2	ILV5_ORYSJ, RecName: Full=Ketol-acid reductoisomerase, chloroplastic EC=1.1.1.86 AltName: Full=Acetohydroxy-acid reductoisomerase AltName: Full=Alpha-keto-beta-hydroxylacyl reductoisomerase AltName: Full=Protein KARI Flags: Precursor	-	2975.7	2983.5	2799	2852.9	2875.7	2924.5	1.01215	0.628542	0.0174173	Nonsignificant	None	4	Molecular Function:ketol-acid reductoisomerase activity (GO:0004455),Biological Process:branched-chain amino acid biosynthetic process (GO:0009082),Molecular Function:oxidoreductase activity (GO:0016491),Biological Process:oxidation-reduction process (GO:0055114)	ketol-acid reductoisomerase	1.1.1.86	ko00290 Valine, leucine and isoleucine biosynthesis ko00770 Pantothenate and CoA biosynthesis ko01100 Metabolic pathways ko01110 Biosynthesis of secondary metabolites ko01210 2-Oxocarboxylic acid metabolism ko01230 Biosynthesis of amino acids	Ketol-acid reductoisomerase	EH	Amino acid transport and metabolism ; Coenzyme transport and metabolism ;
TRINITY_DN180392_c3_g4	BAS1_ORYSJ, RecName: Full=2-Cys peroxiredoxin BAS1, chloroplastic EC=1.11.1.15 AltName: Full=Thiol-specific antioxidant protein Flags: Precursor	-	247.2	231.4	206.9	225.8	205	326	0.905788	0.596508	-0.142755	Nonsignificant	None	5	Molecular Function:antioxidant activity (GO:0016209),Molecular Function:oxidoreductase activity (GO:0016491),Biological Process:cell redox homeostasis (GO:0045454),Molecular Function:peroxiredoxin activity (GO:0051920),Biological Process:oxidation-reduction process (GO:0055114)	peroxiredoxin (alkyl hydroperoxide reductase subunit C)	1.11.1.15		Alkyl hydroperoxide reductase subunit AhpC (peroxiredoxin)	V	Defense mechanisms ;
TRINITY_DN180329_c0_g2	VATA_DAUCA, RecName: Full=V-type proton ATPase catalytic subunit A Short=V-ATPase subunit A EC=3.6.3.14 AltName: Full=V-ATPase 69 kDa subunit AltName: Full=Vacuolar proton pump subunit alpha	-	25.5	24.4	27.6	24.3	23.5	26.2	1.0473	0.399133	0.066671	Nonsignificant	None	3	Molecular Function:ATP binding (GO:0005524),Biological Process:proton transport (GO:0015992),Biological Process:ATP metabolic process (GO:0046034)	V-type H+-transporting ATPase subunit A	3.6.3.14	ko00190 Oxidative phosphorylation ko01100 Metabolic pathways ko04145 Phagosome	Archaeal/vacuolar-type H+-ATPase catalytic subunit A/Vma1	C	Energy production and conversion ;
TRINITY_DN173419_c1_g2	G3PB_ARATH, RecName: Full=Glyceraldehyde-3-phosphate dehydrogenase GAPB, chloroplastic EC=1.2.1.13 AltName: Full=NADP-dependent glyceraldehydephosphate dehydrogenase B Flags: Precursor	-	1113.2	1421.4	1336.5	1537.5	1410.8	1392.3	0.891835	0.226769	-0.165151	Nonsignificant	None	1	Biological Process:oxidation-reduction process (GO:0055114)	glyceraldehyde-3-phosphate dehydrogenase (NADP+) (phosphorylating)	1.2.1.13	ko00710 Carbon fixation in photosynthetic organisms ko01100 Metabolic pathways ko01200 Carbon metabolism	Glyceraldehyde-3-phosphate dehydrogenase/erythrose-4-phosphate dehydrogenase	G	Carbohydrate transport and metabolism ;
TRINITY_DN197873_c1_g2	DTC_ARATH, RecName: Full=Mitochondrial dicarboxylate/tricarboxylate transporter DTC AltName: Full=Dicarboxylate/tricarboxylate carrier	-	355.7	360	373.3	376.8	376.7	417.1	0.930292	0.170195	-0.104244	Nonsignificant	None	1	Biological Process:transmembrane transport (GO:0055085)	solute carrier family 25 (mitochondrial oxoglutarate transporter), member 11	--	--	--	--	--
TRINITY_DN201390_c1_g1	PMA2_SOLLC, RecName: Full=Plasma membrane ATPase 2 EC=3.6.3.6 AltName: Full=Proton pump 2 Flags: Fragment	-	1164	1189	1098.8	1218.5	1154.1	1129.2	0.985722	0.682257	-0.0207478	Nonsignificant	None	1	Cellular Component:integral component of membrane (GO:0016021)	H+-transporting ATPase	3.6.3.6	ko00190 Oxidative phosphorylation	Magnesium-transporting ATPase (P-type)	P	Inorganic ion transport and metabolism ;
TRINITY_DN201672_c0_g1	BAS1_ORYSJ, RecName: Full=2-Cys peroxiredoxin BAS1, chloroplastic EC=1.11.1.15 AltName: Full=Thiol-specific antioxidant protein Flags: Precursor	-	4511.5	4927.8	4577	4437.2	4495.9	4512.6	1.04244	0.277361	0.0599607	Nonsignificant	None	4	Molecular Function:antioxidant activity (GO:0016209),Molecular Function:oxidoreductase activity (GO:0016491),Biological Process:cell redox homeostasis (GO:0045454),Biological Process:oxidation-reduction process (GO:0055114)	peroxiredoxin (alkyl hydroperoxide reductase subunit C)	1.11.1.15		Alkyl hydroperoxide reductase subunit AhpC (peroxiredoxin)	V	Defense mechanisms ;
TRINITY_DN196816_c0_g1	ODP23_ARATH, RecName: Full=Dihydrolipoyllysine-residue acetyltransferase component 3 of pyruvate dehydrogenase complex, mitochondrial EC=2.3.1.12 AltName: Full=Dihydrolipoamide S-acetyltransferase component 3 of pyruvate dehydrogenase complex AltName: Full=Pyruvate dehydrogenase complex component E2 3 Short=PDC-E2 3 Short=PDCE2 3 Flags: Precursor	-	1616.3	1607.3	1575.9	1502.3	1559.2	1419	1.0712	0.1105	0.0992244	Nonsignificant	None	1	Biological Process:metabolic process (GO:0008152)	pyruvate dehydrogenase E2 component (dihydrolipoamide acetyltransferase)	2.3.1.12	ko00010 Glycolysis / Gluconeogenesis ko00020 Citrate cycle (TCA cycle) ko00620 Pyruvate metabolism ko01100 Metabolic pathways ko01110 Biosynthesis of secondary metabolites ko01200 Carbon metabolism	Pyruvate/2-oxoglutarate dehydrogenase complex, dihydrolipoamide acyltransferase (E2) component	C	Energy production and conversion ;
TRINITY_DN179154_c1_g2	PER12_ARATH, RecName: Full=Peroxidase 12 Short=Atperox P12 EC=1.11.1.7 AltName: Full=ATP4a AltName: Full=PRXR6 Flags: Precursor	-	1640.8	1551.7	1405	1870.6	2192.1	1702.7	0.797429	0.0958738	-0.326571	Nonsignificant	None	4	Molecular Function:peroxidase activity (GO:0004601),Biological Process:response to oxidative stress (GO:0006979),Molecular Function:heme binding (GO:0020037),Biological Process:oxidation-reduction process (GO:0055114)	peroxidase	1.11.1.7	ko00940 Phenylpropanoid biosynthesis ko01100 Metabolic pathways ko01110 Biosynthesis of secondary metabolites	--	--	--
TRINITY_DN167696_c0_g3	ENOX_SOLLC, RecName: Full=2-methylene-furan-3-one reductase EC=1.3.1.105 {ECO:0000269|PubMed:16517758} AltName: Full=Enone oxidoreductase Short=SlEO Flags: Precursor	-	878	933.3	903.2	909.4	890.2	974.7	0.978445	0.551228	-0.0314373	Nonsignificant	None	--	--	2-methylene-furan-3-one reductase	1.3.1.105	--	NADPH:quinone reductase or related Zn-dependent oxidoreductase	CR	Energy production and conversion ; General function prediction only ;
TRINITY_DN193312_c0_g1	NRX11_ORYSJ, RecName: Full=Probable nucleoredoxin 1-1 Short=OsNrx1-1 EC=1.8.1.8	-	1922.2	2067.5	2010.8	2204.6	2120.5	1986.7	0.95068	0.254879	-0.0729688	Nonsignificant	None	2	Biological Process:intracellular signal transduction (GO:0035556),Biological Process:cell redox homeostasis (GO:0045454)	nucleoredoxin	1.8.1.8	--	Thiol-disulfide isomerase or thioredoxin	O	Posttranslational modification, protein turnover, chaperones ;
TRINITY_DN191567_c1_g3	ATP5H_ARATH, RecName: Full=ATP synthase subunit d, mitochondrial Short=ATPase subunit d	-	1165.1	1189.8	1192.9	1211.8	1313	1234.2	0.943815	0.140171	-0.0834242	Nonsignificant	None	2	Molecular Function:hydrogen ion transmembrane transporter activity (GO:0015078),Biological Process:ATP synthesis coupled proton transport (GO:0015986)	F-type H+-transporting ATPase subunit d	--	ko00190 Oxidative phosphorylation ko01100 Metabolic pathways	--	--	--
TRINITY_DN178674_c0_g1	G3PC3_ORYSJ, RecName: Full=Glyceraldehyde-3-phosphate dehydrogenase 3, cytosolic EC=1.2.1.12	-	1223.6	1220.2	1231.4	1293.6	1375.7	1400.7	0.902998	0.0540602	-0.147206	Nonsignificant	None	1	Biological Process:oxidation-reduction process (GO:0055114)	glyceraldehyde 3-phosphate dehydrogenase	1.2.1.12	ko00010 Glycolysis / Gluconeogenesis ko00710 Carbon fixation in photosynthetic organisms ko01100 Metabolic pathways ko01110 Biosynthesis of secondary metabolites ko01200 Carbon metabolism ko01230 Biosynthesis of amino acids	Glyceraldehyde-3-phosphate dehydrogenase/erythrose-4-phosphate dehydrogenase	G	Carbohydrate transport and metabolism ;
TRINITY_DN199266_c1_g1	AB1K3_ARATH, RecName: Full=Protein ACTIVITY OF BC1 COMPLEX KINASE 3, chloroplastic {ECO:0000303|PubMed:23673981} Short=ABC1-LIKE KINASE 3 {ECO:0000303|PubMed:23673981} EC=2.7.-.- {ECO:0000255|PROSITE-ProRule:PRU00159} EC=2.7.11.1 {ECO:0000269|PubMed:23632854} AltName: Full=Protein REPRESSOR OF BDR1 {ECO:0000303|PubMed:25882344} Flags: Precursor	-	1827	1791.2	1930	1844.3	1788.2	1723.5	1.03588	0.305294	0.0508638	Nonsignificant	None	3	Molecular Function:protein kinase activity (GO:0004672),Molecular Function:ATP binding (GO:0005524),Biological Process:protein phosphorylation (GO:0006468)	aarF domain-containing kinase	--	--	Predicted unusual protein kinase regulating ubiquinone biosynthesis, AarF/ABC1/UbiB family	HT	Coenzyme transport and metabolism ; Signal transduction mechanisms ;
TRINITY_DN199576_c1_g1	SCP50_ARATH, RecName: Full=Serine carboxypeptidase-like 50 EC=3.4.16.- Flags: Precursor	-	1638.2	1616.9	1719.8	1747.2	1641.5	1355	1.04874	0.582942	0.0686548	Nonsignificant	None	2	Molecular Function:serine-type carboxypeptidase activity (GO:0004185),Biological Process:proteolysis (GO:0006508)	vitellogenic carboxypeptidase-like protein	3.4.16.-	--	Carboxypeptidase C (cathepsin A)	E	Amino acid transport and metabolism ;
TRINITY_DN197639_c0_g1	CAS_MAIZE, RecName: Full=Calcium sensing receptor, chloroplastic AltName: Full=Sulfurtransferase 3 Flags: Precursor	-	1878.6	1952.6	1930.3	1906.2	1885.9	1821.3	1.02638	0.218415	0.0375696	Nonsignificant	None	--	--	--	--	--	--	--	--
TRINITY_DN197162_c0_g1	HS905_ARATH, RecName: Full=Heat shock protein 90-5, chloroplastic {ECO:0000305} Short=AtHSP90.5 {ECO:0000305} Short=AtHsp90-5 {ECO:0000303|PubMed:11599565} AltName: Full=Heat shock protein 88-1 {ECO:0000305} Short=Hsp88-1 {ECO:0000303|PubMed:11599565} AltName: Full=Hsp90C {ECO:0000303|PubMed:23382192} AltName: Full=Protein EMBRYO DEFECTIVE 1956 {ECO:0000303|PubMed:23382192} AltName: Full=Protein …	-	939.6	895.9	778.2	927.6	756.5	686.5	1.10255	0.407947	0.140841	Nonsignificant	None	4	Molecular Function:ATP binding (GO:0005524),Biological Process:protein folding (GO:0006457),Biological Process:response to stress (GO:0006950),Molecular Function:unfolded protein binding (GO:0051082)	heat shock protein 90kDa beta	--	ko04141 Protein processing in endoplasmic reticulum ko04626 Plant-pathogen interaction	Molecular chaperone, HSP90 family	O	Posttranslational modification, protein turnover, chaperones ;
TRINITY_DN196674_c0_g2	DCE_PETHY, RecName: Full=Glutamate decarboxylase Short=GAD EC=4.1.1.15	-	501.4	501.6	532.2	544.5	532.2	522.2	0.96016	0.16724	-0.0586531	Nonsignificant	None	5	Molecular Function:glutamate decarboxylase activity (GO:0004351),Biological Process:glutamate metabolic process (GO:0006536),Molecular Function:carboxy-lyase activity (GO:0016831),Biological Process:carboxylic acid metabolic process (GO:0019752),Molecular Function:pyridoxal phosphate binding (GO:0030170)	glutamate decarboxylase	4.1.1.15	ko00250 Alanine, aspartate and glutamate metabolism ko00410 beta-Alanine metabolism ko00430 Taurine and hypotaurine metabolism ko00650 Butanoate metabolism ko01100 Metabolic pathways ko01110 Biosynthesis of secondary metabolites	Glutamate or tyrosine decarboxylase or a related PLP-dependent protein	E	Amino acid transport and metabolism ;
TRINITY_DN199208_c0_g1	TC159_ARATH, RecName: Full=Translocase of chloroplast 159, chloroplastic Short=AtToc159 EC=3.6.5.- AltName: Full=159 kDa chloroplast outer envelope protein AltName: Full=Plastid protein import 2 AltName: Full=Translocase of chloroplast 160, chloroplastic Short=AtToc160 AltName: Full=Translocase of chloroplast 86, chloroplastic Short=AtToc86	-	142.4	157.4	171.3	161.9	190.4	150.9	0.936208	0.503701	-0.0950986	Nonsignificant	None	1	Molecular Function:GTP binding (GO:0005525)	--	--	--	Predicted GTPase	R	General function prediction only ;
TRINITY_DN201848_c2_g2	AL2B7_ARATH, RecName: Full=Aldehyde dehydrogenase family 2 member B7, mitochondrial Short=ALDH2b EC=1.2.1.3 Flags: Precursor	-	1964.1	2015.6	2048	1770	1754.8	1620.6	1.17147	0.011882	0.228324	Nonsignificant	None	3	Biological Process:metabolic process (GO:0008152),Molecular Function:oxidoreductase activity (GO:0016491),Biological Process:oxidation-reduction process (GO:0055114)	aldehyde dehydrogenase (NAD+)	1.2.1.3	ko00010 Glycolysis / Gluconeogenesis ko00053 Ascorbate and aldarate metabolism ko00071 Fatty acid degradation ko00280 Valine, leucine and isoleucine degradation ko00310 Lysine degradation ko00330 Arginine and proline metabolism ko00340 Histidine metabolism ko00380 Tryptophan metabolism ko00410 beta-Alanine metabolism ko00561 Glycerolipid metabolism ko00620 Pyruvate metabolism ko01100 Metabolic pa…	Acyl-CoA reductase or other NAD-dependent aldehyde dehydrogenase	C	Energy production and conversion ;
TRINITY_DN189303_c1_g1	CB5_ARATH, RecName: Full=Chlorophyll a-b binding protein CP26, chloroplastic AltName: Full=LHCB5 AltName: Full=LHCIIc AltName: Full=Light-harvesting complex II protein 5 Flags: Precursor	-	6000.3	5756.7	5626.5	5523.3	4950	5317.9	1.10083	0.0666072	0.138598	Nonsignificant	None	1	Cellular Component:membrane (GO:0016020)	light-harvesting complex II chlorophyll a/b binding protein 5	--	ko00196 Photosynthesis - antenna proteins ko01100 Metabolic pathways	--	--	--
TRINITY_DN185040_c0_g4	--	-	1547.7	1593.4	1666.4	1546.8	1571.7	1409.4	1.06175	0.211294	0.0864448	Nonsignificant	None	1	Molecular Function:catalytic activity (GO:0003824)	--	--	--	Pimeloyl-ACP methyl ester carboxylesterase	HR	Coenzyme transport and metabolism ; General function prediction only ;
TRINITY_DN184431_c0_g2	PMA1_NICPL, RecName: Full=Plasma membrane ATPase 1 EC=3.6.3.6 AltName: Full=Proton pump 1	-	456.2	466.3	548.8	511.4	524.9	455.7	0.986126	0.858892	-0.0201561	Nonsignificant	None	3	Molecular Function:nucleotide binding (GO:0000166),Cellular Component:integral component of membrane (GO:0016021),Molecular Function:metal ion binding (GO:0046872)	H+-transporting ATPase	3.6.3.6	ko00190 Oxidative phosphorylation	Magnesium-transporting ATPase (P-type)	P	Inorganic ion transport and metabolism ;
TRINITY_DN199989_c2_g5	XYLA_HORVU, RecName: Full=Xylose isomerase EC=5.3.1.5	-	596.2	597.1	592.7	618.8	665.3	562.7	0.967078	0.565079	-0.0482956	Nonsignificant	None	2	Biological Process:carbohydrate metabolic process (GO:0005975),Molecular Function:xylose isomerase activity (GO:0009045)	xylose isomerase	5.3.1.5	ko00040 Pentose and glucuronate interconversions ko00051 Fructose and mannose metabolism ko01100 Metabolic pathways	Xylose isomerase	G	Carbohydrate transport and metabolism ;
TRINITY_DN189402_c0_g3	G3PC1_HORVU, RecName: Full=Glyceraldehyde-3-phosphate dehydrogenase 1, cytosolic EC=1.2.1.12	-	1771.3	1883.2	1923.7	1868.3	1699.7	1771.9	1.04463	0.300444	0.0629869	Nonsignificant	None	1	Biological Process:oxidation-reduction process (GO:0055114)	glyceraldehyde 3-phosphate dehydrogenase	1.2.1.12	ko00010 Glycolysis / Gluconeogenesis ko00710 Carbon fixation in photosynthetic organisms ko01100 Metabolic pathways ko01110 Biosynthesis of secondary metabolites ko01200 Carbon metabolism ko01230 Biosynthesis of amino acids	Glyceraldehyde-3-phosphate dehydrogenase/erythrose-4-phosphate dehydrogenase	G	Carbohydrate transport and metabolism ;
TRINITY_DN201475_c1_g1	SAHH_WHEAT, RecName: Full=Adenosylhomocysteinase Short=AdoHcyase EC=3.3.1.1 AltName: Full=S-adenosyl-L-homocysteine hydrolase	-	286.7	243.7	263.7	209	197.4	289.1	1.14177	0.379149	0.19127	Nonsignificant	None	3	Molecular Function:adenosylhomocysteinase activity (GO:0004013),Biological Process:S-adenosylhomocysteine catabolic process (GO:0019510),Molecular Function:NAD binding (GO:0051287)	adenosylhomocysteinase	3.3.1.1	ko00270 Cysteine and methionine metabolism ko01100 Metabolic pathways	S-adenosylhomocysteine hydrolase	H	Coenzyme transport and metabolism ;
TRINITY_DN199622_c1_g1	PSAD_HORVU, RecName: Full=Photosystem I reaction center subunit II, chloroplastic AltName: Full=Photosystem I 20 kDa subunit Short=PSI-D Flags: Precursor	-	2600.1	2642	2683.5	2774.9	2618.7	2803.6	0.966867	0.25227	-0.048611	Nonsignificant	None	3	Cellular Component:photosystem I (GO:0009522),Cellular Component:photosystem I reaction center (GO:0009538),Biological Process:photosynthesis (GO:0015979)	photosystem I subunit II	--	ko00195 Photosynthesis ko01100 Metabolic pathways	--	--	--
TRINITY_DN190533_c0_g1	KPYC1_ORYSJ, RecName: Full=Pyruvate kinase 1, cytosolic {ECO:0000305} Short=OsPK1 {ECO:0000303|PubMed:21805151} EC=2.7.1.40 {ECO:0000269|PubMed:21805151}	-	1939.1	1929.4	1957.3	1963	1909.3	2014.6	0.989621	0.576567	-0.0150519	Nonsignificant	None	4	Molecular Function:magnesium ion binding (GO:0000287),Molecular Function:pyruvate kinase activity (GO:0004743),Biological Process:glycolytic process (GO:0006096),Molecular Function:potassium ion binding (GO:0030955)	pyruvate kinase	2.7.1.40	ko00010 Glycolysis / Gluconeogenesis ko00230 Purine metabolism ko00620 Pyruvate metabolism ko01100 Metabolic pathways ko01110 Biosynthesis of secondary metabolites ko01200 Carbon metabolism ko01230 Biosynthesis of amino acids	Pyruvate kinase	G	Carbohydrate transport and metabolism ;
TRINITY_DN192442_c1_g1	PRS6A_ORYSJ, RecName: Full=26S proteasome regulatory subunit 6A homolog AltName: Full=Tat-binding protein homolog 1 Short=TBP-1	-	1395.8	1337.8	1363.3	1350.5	1288.2	1363	1.02379	0.334623	0.0339197	Nonsignificant	None	1	Molecular Function:ATP binding (GO:0005524)	26S proteasome regulatory subunit T5	--	ko03050 Proteasome	ATP-dependent 26S proteasome regulatory subunit	O	Posttranslational modification, protein turnover, chaperones ;
TRINITY_DN201719_c1_g1	DEXHC_ARATH, RecName: Full=DExH-box ATP-dependent RNA helicase DExH12 {ECO:0000305} EC=3.6.4.13 {ECO:0000305} AltName: Full=BRR2 homolog A {ECO:0000305} Short=AtBRR2A {ECO:0000303|PubMed:19261069} AltName: Full=Pre-mRNA-splicing helicase BRR2A {ECO:0000305} AltName: Full=Protein EMBRYO DEFECTIVE 1507 {ECO:0000303|PubMed:15266054}	-	1446.4	1377.6	1363.5	1376.4	1396.7	1284.4	1.03204	0.375104	0.0454981	Nonsignificant	None	2	Molecular Function:nucleic acid binding (GO:0003676),Molecular Function:ATP binding (GO:0005524)	pre-mRNA-splicing helicase BRR2	3.6.4.13	ko03040 Spliceosome	Replicative superfamily II helicase	L	Replication, recombination and repair ;
TRINITY_DN175791_c2_g1	RCAB_HORVU, RecName: Full=Ribulose bisphosphate carboxylase/oxygenase activase B, chloroplastic Short=RA B Short=RuBisCO activase B Flags: Precursor	-	4521	5017.6	4778.2	4963.9	5165.4	5208.8	0.933414	0.125574	-0.0994107	Nonsignificant	None	--	--	--	--	--	Ribulose bisphosphate carboxylase small subunit	G	Carbohydrate transport and metabolism ;
TRINITY_DN173334_c2_g1	CH62_MAIZE, RecName: Full=Chaperonin CPN60-2, mitochondrial AltName: Full=HSP60-2 Flags: Precursor	-	693.2	669.2	643	626.7	659.8	607.8	1.05865	0.152779	0.0822252	Nonsignificant	None	3	Molecular Function:ATP binding (GO:0005524),Cellular Component:cytoplasm (GO:0005737),Biological Process:protein refolding (GO:0042026)	chaperonin GroEL	--	ko03018 RNA degradation	Chaperonin GroEL (HSP60 family)	O	Posttranslational modification, protein turnover, chaperones ;
TRINITY_DN200806_c4_g2	DHGY_CUCSA, RecName: Full=Glycerate dehydrogenase Short=GDH EC=1.1.1.29 AltName: Full=NADH-dependent hydroxypyruvate reductase Short=HPR	-	162.8	183	154.7	158.4	149.7	205.3	0.974873	0.837706	-0.0367132	Nonsignificant	None	3	Biological Process:metabolic process (GO:0008152),Molecular Function:NAD binding (GO:0051287),Biological Process:oxidation-reduction process (GO:0055114)	hydroxypyruvate reductase 1	--	ko00260 Glycine, serine and threonine metabolism ko00630 Glyoxylate and dicarboxylate metabolism ko01100 Metabolic pathways ko01110 Biosynthesis of secondary metabolites ko01200 Carbon metabolism	Lactate dehydrogenase or related 2-hydroxyacid dehydrogenase	CHR	Energy production and conversion ; Coenzyme transport and metabolism ; General function prediction only ;
TRINITY_DN195104_c1_g2	MFPA_CUCSA, RecName: Full=Glyoxysomal fatty acid beta-oxidation multifunctional protein MFP-a Includes: RecName: Full=Enoyl-CoA hydratase/3-2-trans-enoyl-CoA isomerase/3-hydroxybutyryl-CoA epimerase EC=4.2.1.17 EC=5.1.2.3 EC=5.3.3.8 Includes: RecName: Full=3-hydroxyacyl-CoA dehydrogenase EC=1.1.1.35	-	1934.5	1813.5	1902.1	1835.1	1840.8	1748.3	1.04165	0.186428	0.058866	Nonsignificant	None	6	Molecular Function:catalytic activity (GO:0003824),Molecular Function:3-hydroxyacyl-CoA dehydrogenase activity (GO:0003857),Biological Process:fatty acid metabolic process (GO:0006631),Biological Process:metabolic process (GO:0008152),Molecular Function:oxidoreductase activity (GO:0016491),Biological Process:oxidation-reduction process (GO:0055114)	--	--	ko00071 Fatty acid degradation ko00592 alpha-Linolenic acid metabolism ko01100 Metabolic pathways ko01110 Biosynthesis of secondary metabolites ko01212 Fatty acid metabolism	3-hydroxyacyl-CoA dehydrogenase	I	Lipid transport and metabolism ;
TRINITY_DN198909_c1_g2	PRXQ_WHEAT, RecName: Full=Peroxiredoxin Q, chloroplastic EC=1.11.1.15 AltName: Full=Thioredoxin peroxidase Flags: Precursor	-	1907.4	2103.8	1888.2	2183.4	2012.5	2121.4	0.933848	0.183795	-0.0987399	Nonsignificant	None	4	Molecular Function:antioxidant activity (GO:0016209),Molecular Function:oxidoreductase activity (GO:0016491),Biological Process:cell redox homeostasis (GO:0045454),Biological Process:oxidation-reduction process (GO:0055114)	peroxiredoxin Q/BCP	1.11.1.15	--	Peroxiredoxin	O	Posttranslational modification, protein turnover, chaperones ;
TRINITY_DN183738_c1_g1	THI42_SORBI, RecName: Full=Thiamine thiazole synthase 2, chloroplastic {ECO:0000255|HAMAP-Rule:MF_03158} AltName: Full=Thiazole biosynthetic enzyme 2 {ECO:0000255|HAMAP-Rule:MF_03158} Flags: Precursor	-	405	355.9	348.7	343.5	472.1	414.8	0.901821	0.403529	-0.149088	Nonsignificant	None	--	--	thiamine thiazole synthase	--	ko00730 Thiamine metabolism ko01100 Metabolic pathways	Archaeal ribulose 1,5-bisphosphate synthetase/yeast thiazole synthase	H	Coenzyme transport and metabolism ;
TRINITY_DN187466_c0_g4	CLPB3_ORYSJ, RecName: Full=Chaperone protein ClpB3, mitochondrial AltName: Full=ATP-dependent Clp protease ATP-binding subunit ClpB homolog 3 AltName: Full=Casein lytic proteinase B3 Flags: Precursor	-	504.6	478.6	459.9	467.5	474.7	460.2	1.02902	0.408395	0.0412734	Nonsignificant	None	2	Molecular Function:ATP binding (GO:0005524),Biological Process:protein metabolic process (GO:0019538)	ATP-dependent Clp protease ATP-binding subunit ClpB	--		ATP-dependent Clp protease ATP-binding subunit ClpA	O	Posttranslational modification, protein turnover, chaperones ;
TRINITY_DN201521_c3_g1	ACC2_ORYSJ, RecName: Full=Acetyl-CoA carboxylase 2 EC=6.4.1.2 Includes: RecName: Full=Biotin carboxylase EC=6.3.4.14	-	1632.8	1512.9	1503.7	1509.1	1504.4	1608.7	1.00588	0.874473	0.00846486	Nonsignificant	None	5	Molecular Function:acetyl-CoA carboxylase activity (GO:0003989),Molecular Function:biotin carboxylase activity (GO:0004075),Molecular Function:ATP binding (GO:0005524),Biological Process:fatty acid biosynthetic process (GO:0006633),Molecular Function:metal ion binding (GO:0046872)	--	--	ko00061 Fatty acid biosynthesis ko00620 Pyruvate metabolism ko00640 Propanoate metabolism ko01100 Metabolic pathways ko01110 Biosynthesis of secondary metabolites ko01212 Fatty acid metabolism	Biotin carboxylase	I	Lipid transport and metabolism ;
TRINITY_DN180650_c0_g4	PR2E2_ORYSJ, RecName: Full=Peroxiredoxin-2E-2, chloroplastic EC=1.11.1.15 AltName: Full=Peroxiredoxin IIE-2 AltName: Full=Thioredoxin peroxidase 2E-2 Flags: Precursor	-	1490.5	1613	1587.9	1566.9	1568.1	1795.4	0.951525	0.417955	-0.0716862	Nonsignificant	None	2	Molecular Function:oxidoreductase activity (GO:0016491),Biological Process:cell redox homeostasis (GO:0045454)	--	--	--	Peroxiredoxin	O	Posttranslational modification, protein turnover, chaperones ;
TRINITY_DN187798_c0_g2	CH20_ARATH, RecName: Full=20 kDa chaperonin, chloroplastic AltName: Full=Chaperonin 10 Short=Ch-CPN10 Short=Cpn10 AltName: Full=Chaperonin 20 AltName: Full=Protein Cpn21 Flags: Precursor	-	1287.6	1284.2	1174	1457.1	1338.1	1371.7	0.898942	0.0526876	-0.153701	Nonsignificant	None	4	Cellular Component:cytoplasm (GO:0005737),Biological Process:protein folding (GO:0006457),Molecular Function:transition metal ion binding (GO:0046914),Biological Process:positive regulation of superoxide dismutase activity (GO:1901671)	chaperonin GroES	--	--	Co-chaperonin GroES (HSP10)	O	Posttranslational modification, protein turnover, chaperones ;
TRINITY_DN179055_c0_g5	ALFP_ORYSJ, RecName: Full=Fructose-bisphosphate aldolase, chloroplastic {ECO:0000305} EC=4.1.2.13 {ECO:0000305} AltName: Full=Chloroplastic aldolase {ECO:0000303|PubMed:8163192} Short=AldP {ECO:0000303|PubMed:8163192} Flags: Precursor	-	2600.9	2970.8	2768.1	3494.4	2619.2	2952.7	0.919868	0.45251	-0.120501	Nonsignificant	None	2	Molecular Function:fructose-bisphosphate aldolase activity (GO:0004332),Biological Process:glycolytic process (GO:0006096)	fructose-bisphosphate aldolase, class I	4.1.2.13	ko00010 Glycolysis / Gluconeogenesis ko00030 Pentose phosphate pathway ko00051 Fructose and mannose metabolism ko00710 Carbon fixation in photosynthetic organisms ko01100 Metabolic pathways ko01110 Biosynthesis of secondary metabolites ko01200 Carbon metabolism ko01230 Biosynthesis of amino acids	Fructose-bisphosphate aldolase class 1	G	Carbohydrate transport and metabolism ;
TRINITY_DN187718_c0_g1	CATA1_GOSHI, RecName: Full=Catalase isozyme 1 EC=1.11.1.6	-	2974.5	2917.2	3036.5	2991.8	2861.3	2922	1.01745	0.374635	0.0249538	Nonsignificant	None	4	Molecular Function:catalase activity (GO:0004096),Biological Process:response to oxidative stress (GO:0006979),Molecular Function:heme binding (GO:0020037),Biological Process:oxidation-reduction process (GO:0055114)	catalase	1.11.1.6	ko00380 Tryptophan metabolism ko00630 Glyoxylate and dicarboxylate metabolism ko01110 Biosynthesis of secondary metabolites ko01200 Carbon metabolism ko04016 MAPK signaling pathway - plant ko04146 Peroxisome	Catalase	P	Inorganic ion transport and metabolism ;
TRINITY_DN199925_c2_g1	KEA2_ARATH, RecName: Full=K(+) efflux antiporter 2, chloroplastic {ECO:0000303|PubMed:11500563} Short=AtKEA2 {ECO:0000303|PubMed:11500563} Flags: Precursor	-	1277.8	1233.1	1259.3	1225.6	1216.4	1266.9	1.01653	0.371316	0.0236497	Nonsignificant	None	5	Biological Process:cation transport (GO:0006812),Biological Process:potassium ion transport (GO:0006813),Molecular Function:solute:proton antiporter activity (GO:0015299),Cellular Component:integral component of membrane (GO:0016021),Biological Process:transmembrane transport (GO:0055085)	--	--	--	Voltage-gated potassium channel Kch	P	Inorganic ion transport and metabolism ;
TRINITY_DN175109_c0_g3	ALFP_ORYSJ, RecName: Full=Fructose-bisphosphate aldolase, chloroplastic {ECO:0000305} EC=4.1.2.13 {ECO:0000305} AltName: Full=Chloroplastic aldolase {ECO:0000303|PubMed:8163192} Short=AldP {ECO:0000303|PubMed:8163192} Flags: Precursor	-	248.3	276.1	223.9	244.5	220.7	282.1	1.00134	0.989328	0.00192925	Nonsignificant	None	2	Molecular Function:fructose-bisphosphate aldolase activity (GO:0004332),Biological Process:glycolytic process (GO:0006096)	fructose-bisphosphate aldolase, class I	4.1.2.13	ko00010 Glycolysis / Gluconeogenesis ko00030 Pentose phosphate pathway ko00051 Fructose and mannose metabolism ko00710 Carbon fixation in photosynthetic organisms ko01100 Metabolic pathways ko01110 Biosynthesis of secondary metabolites ko01200 Carbon metabolism ko01230 Biosynthesis of amino acids	Fructose-bisphosphate aldolase class 1	G	Carbohydrate transport and metabolism ;
TRINITY_DN180306_c1_g1	CYSK_MAIZE, RecName: Full=Cysteine synthase Short=CSase EC=2.5.1.47 AltName: Full=O-acetylserine (thiol)-lyase Short=OAS-TL AltName: Full=O-acetylserine sulfhydrylase	-	2742.9	2364.2	2586.3	2421.9	2128	2426	1.10285	0.181424	0.141242	Nonsignificant	None	--	--	cysteine synthase A	2.5.1.47	ko00270 Cysteine and methionine metabolism ko00920 Sulfur metabolism ko01100 Metabolic pathways ko01110 Biosynthesis of secondary metabolites ko01200 Carbon metabolism ko01230 Biosynthesis of amino acids	Cysteine synthase	E	Amino acid transport and metabolism ;
TRINITY_DN169313_c1_g4	GLTB_MAIZE, RecName: Full=Ferredoxin-dependent glutamate synthase, chloroplastic EC=1.4.7.1 AltName: Full=Fd-GOGAT Flags: Precursor	-	179.5	218	193.9	202.3	168.5	229.7	0.984846	0.893134	-0.02203	Nonsignificant	None	5	Biological Process:glutamate biosynthetic process (GO:0006537),Biological Process:metabolic process (GO:0008152),Molecular Function:glutamate synthase activity (GO:0015930),Molecular Function:oxidoreductase activity (GO:0016491),Biological Process:oxidation-reduction process (GO:0055114)	glutamate synthase (ferredoxin)	1.4.7.1	ko00630 Glyoxylate and dicarboxylate metabolism ko00910 Nitrogen metabolism	Glutamate synthase domain 3	E	Amino acid transport and metabolism ;
TRINITY_DN197349_c0_g1	UGPA_HORVU, RecName: Full=UTP--glucose-1-phosphate uridylyltransferase EC=2.7.7.9 AltName: Full=UDP-glucose pyrophosphorylase Short=UDPGP Short=UGPase	-	488.5	497.9	514.3	493.8	463.5	537.3	1.00408	0.935348	0.00587617	Nonsignificant	None	2	Biological Process:metabolic process (GO:0008152),Molecular Function:uridylyltransferase activity (GO:0070569)	UTP--glucose-1-phosphate uridylyltransferase	2.7.7.9	ko00040 Pentose and glucuronate interconversions ko00052 Galactose metabolism ko00500 Starch and sucrose metabolism ko00520 Amino sugar and nucleotide sugar metabolism ko01100 Metabolic pathways	UDP-N-acetylglucosamine pyrophosphorylase	G	Carbohydrate transport and metabolism ;
TRINITY_DN189474_c1_g3	SCRK6_ARATH, RecName: Full=Probable fructokinase-6, chloroplastic EC=2.7.1.4 Flags: Precursor	-	1713.8	1906.2	1858.3	1848.4	1876	1844.7	0.983696	0.654772	-0.0237159	Nonsignificant	None	2	Molecular Function:ribokinase activity (GO:0004747),Biological Process:D-ribose metabolic process (GO:0006014)	fructokinase	2.7.1.4	ko00051 Fructose and mannose metabolism ko00500 Starch and sucrose metabolism ko00520 Amino sugar and nucleotide sugar metabolism ko01100 Metabolic pathways	Sugar or nucleoside kinase, ribokinase family	G	Carbohydrate transport and metabolism ;
TRINITY_DN191426_c2_g3	LEC_PARPC, RecName: Full=Mannose/glucose-specific lectin Flags: Fragment	-	795.8	933.6	4629.3	881.5	724	773.9	2.6724	0.401514	1.41813	Nonsignificant	None	--	--	--	--	--	--	--	--
TRINITY_DN200111_c1_g2	HSP7P_ARATH, RecName: Full=Heat shock 70 kDa protein 15 AltName: Full=Heat shock protein 70-15 Short=AtHsp70-15	-	1907	1720.9	1672.4	1836	1757.9	1812.4	0.980393	0.677353	-0.0285676	Nonsignificant	None	--	--	heat shock 70kDa protein 4	--		Molecular chaperone DnaK (HSP70)	O	Posttranslational modification, protein turnover, chaperones ;
TRINITY_DN187661_c1_g2	SERB1_ARATH, RecName: Full=Phosphoserine aminotransferase 1, chloroplastic Short=AtPSAT1 EC=2.6.1.52 AltName: Full=Phosphohydroxythreonine aminotransferase Flags: Precursor	-	2228	2184.6	2251.2	2190.4	2214.5	2126	1.02035	0.254377	0.0290633	Nonsignificant	None	--	--	phosphoserine aminotransferase	2.6.1.52	ko00260 Glycine, serine and threonine metabolism ko00750 Vitamin B6 metabolism ko01100 Metabolic pathways ko01200 Carbon metabolism ko01230 Biosynthesis of amino acids	Phosphoserine aminotransferase	HE	Coenzyme transport and metabolism ; Amino acid transport and metabolism ;
TRINITY_DN182128_c5_g1	ATP5H_ARATH, RecName: Full=ATP synthase subunit d, mitochondrial Short=ATPase subunit d	-	2529.4	2609.5	2607.1	2537.4	2546.5	2476.3	1.02458	0.147668	0.0350271	Nonsignificant	None	2	Molecular Function:hydrogen ion transmembrane transporter activity (GO:0015078),Biological Process:ATP synthesis coupled proton transport (GO:0015986)	F-type H+-transporting ATPase subunit d	--	ko00190 Oxidative phosphorylation ko01100 Metabolic pathways	--	--	--
TRINITY_DN201459_c1_g1	F16P1_ORYSJ, RecName: Full=Fructose-1,6-bisphosphatase, chloroplastic {ECO:0000305} Short=FBPase {ECO:0000305} EC=3.1.3.11 {ECO:0000305} AltName: Full=D-fructose-1,6-bisphosphate 1-phosphohydrolase {ECO:0000305} Flags: Precursor	-	2376.6	2458.6	2223.9	2519.2	2374.4	2502	0.9545	0.255679	-0.0671829	Nonsignificant	None	3	Biological Process:carbohydrate metabolic process (GO:0005975),Molecular Function:phosphatase activity (GO:0016791),Molecular Function:fructose 1,6-bisphosphate 1-phosphatase activity (GO:0042132)	fructose-1,6-bisphosphatase I	3.1.3.11	ko00010 Glycolysis / Gluconeogenesis ko00030 Pentose phosphate pathway ko00051 Fructose and mannose metabolism ko00710 Carbon fixation in photosynthetic organisms ko01100 Metabolic pathways ko01110 Biosynthesis of secondary metabolites ko01200 Carbon metabolism	Fructose-1,6-bisphosphatase	G	Carbohydrate transport and metabolism ;
TRINITY_DN196594_c3_g2	PDX11_ORYSJ, RecName: Full=Probable pyridoxal 5-phosphate synthase subunit PDX1.1 Short=PLP synthase subunit PDX1.1 EC=4.3.3.6	-	2773.6	2600	2698.3	2692.5	2750.7	2718.9	0.988949	0.618387	-0.0160321	Nonsignificant	None	2	Biological Process:vitamin B6 biosynthetic process (GO:0042819),Biological Process:pyridoxal phosphate biosynthetic process (GO:0042823)	pyridoxal 5'-phosphate synthase pdxS subunit	4.3.3.6	ko00750 Vitamin B6 metabolism	Pyridoxal biosynthesis lyase PdxS	H	Coenzyme transport and metabolism ;
TRINITY_DN190434_c0_g2	SQD1_SPIOL, RecName: Full=UDP-sulfoquinovose synthase, chloroplastic EC=3.13.1.1 AltName: Full=SoSQD1 AltName: Full=Sulfite:UDP-glucose sulfotransferase AltName: Full=Sulfolipid biosynthesis protein Flags: Precursor	-	1834	2074.5	1927.5	1956.5	2010.1	2083.4	0.964628	0.432954	-0.0519553	Nonsignificant	None	2	Molecular Function:catalytic activity (GO:0003824),Molecular Function:coenzyme binding (GO:0050662)	UDP-sulfoquinovose synthase	3.13.1.1	ko00520 Amino sugar and nucleotide sugar metabolism ko00561 Glycerolipid metabolism	Nucleoside-diphosphate-sugar epimerase	M	Cell wall/membrane/envelope biogenesis ;
TRINITY_DN194199_c0_g1	SCRK6_ARATH, RecName: Full=Probable fructokinase-6, chloroplastic EC=2.7.1.4 Flags: Precursor	-	122	117	117.1	125.9	140.7	144.7	0.865791	0.0746245	-0.207909	Nonsignificant	None	--	--	fructokinase	2.7.1.4	ko00051 Fructose and mannose metabolism ko00500 Starch and sucrose metabolism ko00520 Amino sugar and nucleotide sugar metabolism ko01100 Metabolic pathways	Sugar or nucleoside kinase, ribokinase family	G	Carbohydrate transport and metabolism ;
TRINITY_DN192124_c0_g1	CGEP_ORYSJ, RecName: Full=Probable glutamyl endopeptidase, chloroplastic EC=3.4.21.- Flags: Precursor	-	1589.1	1612.8	1674.1	1828.8	1639	1713.6	0.941058	0.198576	-0.0876438	Nonsignificant	None	--	--	--	--	--	Dipeptidyl aminopeptidase/acylaminoacyl peptidase	E	Amino acid transport and metabolism ;
TRINITY_DN200540_c1_g3	EFTM_ARATH, RecName: Full=Elongation factor Tu, mitochondrial Flags: Precursor	-	1532.5	1575.7	1558.9	1531.1	1568.8	1421.5	1.03222	0.387805	0.0457568	Nonsignificant	None	2	Molecular Function:GTPase activity (GO:0003924),Molecular Function:GTP binding (GO:0005525)	elongation factor Tu	--	--	Translation elongation factor EF-Tu, a GTPase	J	Translation, ribosomal structure and biogenesis ;
TRINITY_DN190557_c0_g1	AVP_HORVU, RecName: Full=Pyrophosphate-energized vacuolar membrane proton pump EC=3.6.1.1 AltName: Full=Pyrophosphate-energized inorganic pyrophosphatase Short=H(+)-PPase	-	675.6	601.6	646.2	644.7	612.5	704.2	0.980626	0.732302	-0.028225	Nonsignificant	None	4	Molecular Function:inorganic diphosphatase activity (GO:0004427),Molecular Function:hydrogen-translocating pyrophosphatase activity (GO:0009678),Biological Process:proton transport (GO:0015992),Cellular Component:membrane (GO:0016020)	inorganic pyrophosphatase	3.6.1.1	ko00190 Oxidative phosphorylation	Na+ or H+-translocating membrane pyrophosphatase	C	Energy production and conversion ;
TRINITY_DN199907_c1_g2	CRWN1_ARATH, RecName: Full=Protein CROWDED NUCLEI 1 {ECO:0000303|PubMed:24308514} AltName: Full=Protein KAKU2 {ECO:0000303|PubMed:24824484} AltName: Full=Protein LITTLE NUCLEI 1 {ECO:0000303|PubMed:17873096}	-	404.9	344.4	459.1	364.7	517.6	394.5	0.946429	0.713308	-0.0794345	Nonsignificant	None	--	--	--	--	--	--	--	--
TRINITY_DN193119_c0_g2	TCPQ_ARATH, RecName: Full=T-complex protein 1 subunit theta {ECO:0000303|PubMed:11599560} Short=TCP-1-theta {ECO:0000303|PubMed:11599560} AltName: Full=CCT-theta {ECO:0000303|PubMed:11599560} AltName: Full=Chaperonin CCT8 {ECO:0000303|PubMed:21868675} AltName: Full=Chaperonin containing TCP1 8 {ECO:0000303|PubMed:21868675} AltName: Full=TCP1-ring complex {ECO:0000303|PubMed:21868675}	-	523.1	444.3	463.5	435.6	425.8	449.7	1.09137	0.229373	0.126145	Nonsignificant	None	1	Molecular Function:ATP binding (GO:0005524)	T-complex protein 1 subunit theta	--	--	Chaperonin GroEL (HSP60 family)	O	Posttranslational modification, protein turnover, chaperones ;
TRINITY_DN182924_c0_g7	PER52_ARATH, RecName: Full=Peroxidase 52 Short=Atperox P52 EC=1.11.1.7 AltName: Full=ATP49 Flags: Precursor	-	979.9	911.6	979.4	848.5	965	739.7	1.12443	0.24012	0.169197	Nonsignificant	None	4	Molecular Function:peroxidase activity (GO:0004601),Biological Process:response to oxidative stress (GO:0006979),Molecular Function:heme binding (GO:0020037),Biological Process:oxidation-reduction process (GO:0055114)	peroxidase	1.11.1.7	ko00940 Phenylpropanoid biosynthesis ko01100 Metabolic pathways ko01110 Biosynthesis of secondary metabolites	--	--	--
TRINITY_DN195259_c0_g3	ISPH_ORYSJ, RecName: Full=4-hydroxy-3-methylbut-2-enyl diphosphate reductase, chloroplastic EC=1.17.7.4 Flags: Precursor	-	2057.8	2167	2128	2006.5	1979.7	2143	1.03648	0.292145	0.0516938	Nonsignificant	None	3	Molecular Function:metal ion binding (GO:0046872),Biological Process:dimethylallyl diphosphate biosynthetic process (GO:0050992),Molecular Function:4-hydroxy-3-methylbut-2-en-1-yl diphosphate reductase activity (GO:0051745)	4-hydroxy-3-methylbut-2-en-1-yl diphosphate reductase	1.17.7.4	ko00900 Terpenoid backbone biosynthesis ko01100 Metabolic pathways ko01110 Biosynthesis of secondary metabolites	4-Hydroxy-3-methylbut-2-enyl diphosphate reductase IspH	I	Lipid transport and metabolism ;
TRINITY_DN181586_c0_g1	--	-	2148.8	2167.8	2200.5	2071	2233.6	1962.7	1.03986	0.401573	0.0563861	Nonsignificant	None	2	Molecular Function:DNA binding (GO:0003677),Cellular Component:nucleus (GO:0005634)	--	--	--	--	--	--
TRINITY_DN201603_c5_g2	PRP8A_ARATH, RecName: Full=Pre-mRNA-processing-splicing factor 8A {ECO:0000305} AltName: Full=PRP8 homolog A {ECO:0000305} Short=AtPRP8A {ECO:0000303|PubMed:19261069} AltName: Full=Protein ABNORMAL SUSPENSOR 2 {ECO:0000303|Ref.3} AltName: Full=Protein EMBRYO DEFECTIVE 14 {ECO:0000303|Ref.3} AltName: Full=Protein EMBRYO DEFECTIVE 177 {ECO:0000303|Ref.3} AltName: Full=Protein EMBRYO DEFECTIVE 33 {E…	-	1836.6	1841.4	2020.6	1790.7	1889.5	1668.6	1.0654	0.256076	0.0913923	Nonsignificant	None	5	Molecular Function:RNA binding (GO:0003723),Molecular Function:protein binding (GO:0005515),Cellular Component:spliceosomal complex (GO:0005681),Molecular Function:U6 snRNA binding (GO:0017070),Molecular Function:U5 snRNA binding (GO:0030623)	pre-mRNA-processing factor 8	--	ko03040 Spliceosome	--	--	--
TRINITY_DN191607_c2_g1	CH20_ARATH, RecName: Full=20 kDa chaperonin, chloroplastic AltName: Full=Chaperonin 10 Short=Ch-CPN10 Short=Cpn10 AltName: Full=Chaperonin 20 AltName: Full=Protein Cpn21 Flags: Precursor	-	170.9	179.3	162.6	168.8	180.9	181.2	0.965907	0.395067	-0.0500439	Nonsignificant	None	4	Cellular Component:cytoplasm (GO:0005737),Biological Process:protein folding (GO:0006457),Molecular Function:transition metal ion binding (GO:0046914),Biological Process:positive regulation of superoxide dismutase activity (GO:1901671)	chaperonin GroES	--	--	Co-chaperonin GroES (HSP10)	O	Posttranslational modification, protein turnover, chaperones ;
TRINITY_DN196731_c1_g2	ASPRX_ORYSJ, RecName: Full=Aspartic proteinase EC=3.4.23.- Flags: Precursor	-	1940.8	1957.5	1955.6	1821.3	1751.4	1430.9	1.16994	0.142127	0.226432	Nonsignificant	None	3	Molecular Function:aspartic-type endopeptidase activity (GO:0004190),Biological Process:proteolysis (GO:0006508),Biological Process:lipid metabolic process (GO:0006629)	phytepsin	3.4.23.40	--	--	--	--
TRINITY_DN195876_c0_g1	ODP23_ARATH, RecName: Full=Dihydrolipoyllysine-residue acetyltransferase component 3 of pyruvate dehydrogenase complex, mitochondrial EC=2.3.1.12 AltName: Full=Dihydrolipoamide S-acetyltransferase component 3 of pyruvate dehydrogenase complex AltName: Full=Pyruvate dehydrogenase complex component E2 3 Short=PDC-E2 3 Short=PDCE2 3 Flags: Precursor	-	20	24.1	19	23.2	19.5	20.2	1.00318	0.974239	0.00457999	Nonsignificant	None	1	Biological Process:metabolic process (GO:0008152)	pyruvate dehydrogenase E2 component (dihydrolipoamide acetyltransferase)	2.3.1.12	ko00010 Glycolysis / Gluconeogenesis ko00020 Citrate cycle (TCA cycle) ko00620 Pyruvate metabolism ko01100 Metabolic pathways ko01110 Biosynthesis of secondary metabolites ko01200 Carbon metabolism	Pyruvate/2-oxoglutarate dehydrogenase complex, dihydrolipoamide acyltransferase (E2) component	C	Energy production and conversion ;
TRINITY_DN202049_c4_g3	--	-	1325.4	1150.9	1054.9	956.9	1078.3	889.1	1.20754	0.112504	0.272067	Nonsignificant	None	--	--	--	--	--	Periplasmic component of the Tol biopolymer transport system	U	Intracellular trafficking, secretion, and vesicular transport ;
TRINITY_DN202054_c2_g1	CATA2_HORVU, RecName: Full=Catalase isozyme 2 EC=1.11.1.6	-	1150.5	1055	1226.6	950.1	827.3	640.2	1.41963	0.0437876	0.505516	Significant	up	4	Molecular Function:catalase activity (GO:0004096),Biological Process:response to oxidative stress (GO:0006979),Molecular Function:heme binding (GO:0020037),Biological Process:oxidation-reduction process (GO:0055114)	catalase	1.11.1.6	ko00380 Tryptophan metabolism ko00630 Glyoxylate and dicarboxylate metabolism ko01110 Biosynthesis of secondary metabolites ko01200 Carbon metabolism ko04016 MAPK signaling pathway - plant ko04146 Peroxisome	Catalase	P	Inorganic ion transport and metabolism ;
TRINITY_DN201412_c1_g2	UBE12_WHEAT, RecName: Full=Ubiquitin-activating enzyme E1 2 EC=6.2.1.45 {ECO:0000250|UniProtKB:P20973}	-	246.5	251	248.4	248.7	239.6	242.6	1.02052	0.194929	0.0293082	Nonsignificant	None	1	Molecular Function:small protein activating enzyme activity (GO:0008641)	ubiquitin-activating enzyme E1	6.2.1.45	ko04120 Ubiquitin mediated proteolysis	Ubiquitin	O	Posttranslational modification, protein turnover, chaperones ;
TRINITY_DN199429_c1_g1	APS2_ARATH, RecName: Full=ATP sulfurylase 2 EC=2.7.7.4 Flags: Precursor	-	1401.5	1503	1413.8	1364.7	1324.5	1753.3	0.972043	0.793458	-0.0409083	Nonsignificant	None	1	Molecular Function:sulfate adenylyltransferase (ATP) activity (GO:0004781)	--	--	ko00230 Purine metabolism ko00261 Monobactam biosynthesis ko00450 Selenocompound metabolism ko00920 Sulfur metabolism ko01100 Metabolic pathways	ATP sulfurylase (sulfate adenylyltransferase)	P	Inorganic ion transport and metabolism ;
TRINITY_DN195483_c0_g2	SQD1_SPIOL, RecName: Full=UDP-sulfoquinovose synthase, chloroplastic EC=3.13.1.1 AltName: Full=SoSQD1 AltName: Full=Sulfite:UDP-glucose sulfotransferase AltName: Full=Sulfolipid biosynthesis protein Flags: Precursor	-	43.4	63.6	56.2	55.4	48.8	63.1	0.975493	0.859782	-0.0357964	Nonsignificant	None	2	Molecular Function:catalytic activity (GO:0003824),Molecular Function:coenzyme binding (GO:0050662)	UDP-sulfoquinovose synthase	3.13.1.1	ko00520 Amino sugar and nucleotide sugar metabolism ko00561 Glycerolipid metabolism	Nucleoside-diphosphate-sugar epimerase	M	Cell wall/membrane/envelope biogenesis ;
TRINITY_DN199218_c0_g1	ISPH_ORYSJ, RecName: Full=4-hydroxy-3-methylbut-2-enyl diphosphate reductase, chloroplastic EC=1.17.7.4 Flags: Precursor	-	231.3	236.4	216.6	231.5	284	240.6	0.905039	0.274995	-0.143948	Nonsignificant	None	3	Molecular Function:metal ion binding (GO:0046872),Biological Process:dimethylallyl diphosphate biosynthetic process (GO:0050992),Molecular Function:4-hydroxy-3-methylbut-2-en-1-yl diphosphate reductase activity (GO:0051745)	4-hydroxy-3-methylbut-2-en-1-yl diphosphate reductase	1.17.7.4	ko00900 Terpenoid backbone biosynthesis ko01100 Metabolic pathways ko01110 Biosynthesis of secondary metabolites	4-Hydroxy-3-methylbut-2-enyl diphosphate reductase IspH	I	Lipid transport and metabolism ;
TRINITY_DN167968_c2_g2	GLNA2_ORYSJ, RecName: Full=Glutamine synthetase, chloroplastic EC=6.3.1.2 AltName: Full=Glutamate--ammonia ligase AltName: Full=OsGS2 Short=GS2 Flags: Precursor	-	3285.1	3653	3548.3	3343.2	3346.7	3655.3	1.01365	0.7703	0.0195579	Nonsignificant	None	3	Molecular Function:glutamate-ammonia ligase activity (GO:0004356),Biological Process:glutamine biosynthetic process (GO:0006542),Biological Process:nitrogen compound metabolic process (GO:0006807)	glutamine synthetase	6.3.1.2	ko00220 Arginine biosynthesis ko00250 Alanine, aspartate and glutamate metabolism ko00630 Glyoxylate and dicarboxylate metabolism ko00910 Nitrogen metabolism ko01100 Metabolic pathways ko01230 Biosynthesis of amino acids	Glutamine synthetase	E	Amino acid transport and metabolism ;
TRINITY_DN175273_c0_g1	HSP7C_PETHY, RecName: Full=Heat shock cognate 70 kDa protein	-	902.6	880.1	728.2	886.7	756.1	635.1	1.10229	0.444788	0.1405	Nonsignificant	None	--	--	heat shock 70kDa protein 1/2/6/8	--	ko03040 Spliceosome ko04141 Protein processing in endoplasmic reticulum ko04144 Endocytosis	Molecular chaperone DnaK (HSP70)	O	Posttranslational modification, protein turnover, chaperones ;
TRINITY_DN189701_c1_g1	ODPA1_ORYSJ, RecName: Full=Pyruvate dehydrogenase E1 component subunit alpha-1, mitochondrial Short=PDHE1-A EC=1.2.4.1 Flags: Precursor	-	1782.3	1681.8	1755.7	1582.2	1669.2	1664.7	1.06178	0.0704776	0.0864803	Nonsignificant	None	1	Biological Process:metabolic process (GO:0008152)	pyruvate dehydrogenase E1 component alpha subunit	1.2.4.1	ko00010 Glycolysis / Gluconeogenesis ko00020 Citrate cycle (TCA cycle) ko00620 Pyruvate metabolism ko01100 Metabolic pathways ko01110 Biosynthesis of secondary metabolites ko01200 Carbon metabolism	TPP-dependent pyruvate or acetoin dehydrogenase subunit alpha	C	Energy production and conversion ;
TRINITY_DN192818_c0_g1	PMI1_ARATH, RecName: Full=Protein PLASTID MOVEMENT IMPAIRED 1 {ECO:0000303|PubMed:16113226}	-	1148.7	1187.4	1176.9	1217.6	1227.6	1233.1	0.955061	0.0284705	-0.0663356	Nonsignificant	None	1	Biological Process:chloroplast relocation (GO:0009902)	--	--	--	--	--	--
TRINITY_DN191519_c0_g2	FKB70_WHEAT, RecName: Full=70 kDa peptidyl-prolyl isomerase EC=5.2.1.8 AltName: Full=Peptidyl-prolyl cis-trans isomerase Short=PPIase AltName: Full=Rotamase	-	393.7	416.3	368.8	401.2	359.6	355.9	1.05561	0.358817	0.0780773	Nonsignificant	None	1	Molecular Function:protein binding (GO:0005515)	FK506-binding protein 4/5	5.2.1.8		FKBP-type peptidyl-prolyl cis-trans isomerase	O	Posttranslational modification, protein turnover, chaperones ;
TRINITY_DN186369_c0_g2	DCE1_ARATH, RecName: Full=Glutamate decarboxylase 1 Short=GAD 1 EC=4.1.1.15	-	1200.6	1129.7	1211.7	1229.3	1240.1	1152.6	0.977913	0.518155	-0.0322223	Nonsignificant	None	5	Molecular Function:glutamate decarboxylase activity (GO:0004351),Biological Process:glutamate metabolic process (GO:0006536),Molecular Function:carboxy-lyase activity (GO:0016831),Biological Process:carboxylic acid metabolic process (GO:0019752),Molecular Function:pyridoxal phosphate binding (GO:0030170)	glutamate decarboxylase	4.1.1.15	ko00250 Alanine, aspartate and glutamate metabolism ko00410 beta-Alanine metabolism ko00430 Taurine and hypotaurine metabolism ko00650 Butanoate metabolism ko01100 Metabolic pathways ko01110 Biosynthesis of secondary metabolites	Glutamate or tyrosine decarboxylase or a related PLP-dependent protein	E	Amino acid transport and metabolism ;
TRINITY_DN200474_c3_g1	EF1A_ORYSJ, RecName: Full=Elongation factor 1-alpha Short=EF-1-alpha	-	2695.2	2484	2657.5	2675.1	2397.1	2480.8	1.03756	0.420948	0.0531965	Nonsignificant	None	2	Molecular Function:GTPase activity (GO:0003924),Molecular Function:GTP binding (GO:0005525)	elongation factor 1-alpha	--	ko03013 RNA transport	Translation elongation factor EF-1alpha (GTPase)	J	Translation, ribosomal structure and biogenesis ;
TRINITY_DN201682_c1_g4	LGUC_ARATH, RecName: Full=Probable lactoylglutathione lyase, chloroplastic EC=4.4.1.5 AltName: Full=Glyoxalase I Flags: Precursor	-	1324.4	1480.1	1394.2	1411.5	1584.6	1569.4	0.919658	0.164681	-0.12083	Nonsignificant	None	--	--	lactoylglutathione lyase	4.4.1.5	ko00620 Pyruvate metabolism	Catechol 2,3-dioxygenase or other lactoylglutathione lyase family enzyme	Q	Secondary metabolites biosynthesis, transport and catabolism ;
TRINITY_DN201996_c1_g1	ALFC5_ARATH, RecName: Full=Fructose-bisphosphate aldolase 5, cytosolic {ECO:0000305} Short=AtFBA5 {ECO:0000303|PubMed:22561114} EC=4.1.2.13 {ECO:0000250|UniProtKB:Q9SJQ9}	-	1577	1747.8	1665.6	1701.4	1771.4	2101.2	0.8953	0.2514	-0.159558	Nonsignificant	None	2	Molecular Function:fructose-bisphosphate aldolase activity (GO:0004332),Biological Process:glycolytic process (GO:0006096)	fructose-bisphosphate aldolase, class I	4.1.2.13	ko00010 Glycolysis / Gluconeogenesis ko00030 Pentose phosphate pathway ko00051 Fructose and mannose metabolism ko00710 Carbon fixation in photosynthetic organisms ko01100 Metabolic pathways ko01110 Biosynthesis of secondary metabolites ko01200 Carbon metabolism ko01230 Biosynthesis of amino acids	Fructose-bisphosphate aldolase class 1	G	Carbohydrate transport and metabolism ;
TRINITY_DN192099_c0_g1	DXR_ORYSJ, RecName: Full=1-deoxy-D-xylulose 5-phosphate reductoisomerase, chloroplastic Short=1-deoxyxylulose-5-phosphate reductoisomerase Short=DXP reductoisomerase EC=1.1.1.267 AltName: Full=2-C-methyl-D-erythritol 4-phosphate synthase Flags: Precursor	-	1539.6	1614.3	1638.5	1421.4	1585	1802.6	0.996548	0.965304	-0.0049886	Nonsignificant	None	6	Molecular Function:protein binding (GO:0005515),Biological Process:isoprenoid biosynthetic process (GO:0008299),Molecular Function:1-deoxy-D-xylulose-5-phosphate reductoisomerase activity (GO:0030604),Molecular Function:metal ion binding (GO:0046872),Biological Process:oxidation-reduction process (GO:0055114),Molecular Function:NADPH binding (GO:0070402)	1-deoxy-D-xylulose-5-phosphate reductoisomerase	1.1.1.267	ko00900 Terpenoid backbone biosynthesis ko01100 Metabolic pathways ko01110 Biosynthesis of secondary metabolites	1-deoxy-D-xylulose 5-phosphate reductoisomerase	I	Lipid transport and metabolism ;
TRINITY_DN186078_c3_g1	SCRK2_ORYSJ, RecName: Full=Fructokinase-2 EC=2.7.1.4 AltName: Full=Fructokinase II AltName: Full=OsFKII	-	2228.7	1708.6	1957	1796.8	1809.7	1892.6	1.07187	0.474538	0.100125	Nonsignificant	None	--	--	fructokinase	2.7.1.4	ko00051 Fructose and mannose metabolism ko00500 Starch and sucrose metabolism ko00520 Amino sugar and nucleotide sugar metabolism ko01100 Metabolic pathways	Sugar or nucleoside kinase, ribokinase family	G	Carbohydrate transport and metabolism ;
TRINITY_DN194663_c0_g5	TI110_ARATH, RecName: Full=Protein TIC110, chloroplastic AltName: Full=Translocon at the inner envelope membrane of chloroplasts 110 Short=AtTIC110 Flags: Precursor	-	1198.7	1229.6	1112.1	1145.2	1003.5	1296.2	1.02772	0.753567	0.0394503	Nonsignificant	None	1	Cellular Component:chloroplast (GO:0009507)	--	--	--	--	--	--
TRINITY_DN195276_c2_g1	ACLB1_ORYSJ, RecName: Full=ATP-citrate synthase beta chain protein 1 Short=ATP-citrate synthase B-1 EC=2.3.3.8 AltName: Full=ATP-citrate lyase B-1 AltName: Full=Citrate cleavage enzyme B-1	-	1955.2	1848	1805.6	1840.5	1922.5	1952.5	0.981331	0.560337	-0.0271876	Nonsignificant	None	2	Molecular Function:catalytic activity (GO:0003824),Biological Process:metabolic process (GO:0008152)	ATP citrate (pro-S)-lyase	2.3.3.8	ko00020 Citrate cycle (TCA cycle) ko01100 Metabolic pathways ko01110 Biosynthesis of secondary metabolites	Citrate synthase	C	Energy production and conversion ;
TRINITY_DN174994_c0_g1	CATA2_HORVU, RecName: Full=Catalase isozyme 2 EC=1.11.1.6	-	66	68	72.4	54	48.5	41.2	1.43633	0.0155228	0.522383	Significant	up	4	Molecular Function:catalase activity (GO:0004096),Biological Process:response to oxidative stress (GO:0006979),Molecular Function:heme binding (GO:0020037),Biological Process:oxidation-reduction process (GO:0055114)	catalase	1.11.1.6	ko00380 Tryptophan metabolism ko00630 Glyoxylate and dicarboxylate metabolism ko01110 Biosynthesis of secondary metabolites ko01200 Carbon metabolism ko04016 MAPK signaling pathway - plant ko04146 Peroxisome	Catalase	P	Inorganic ion transport and metabolism ;
TRINITY_DN180747_c3_g1	GLO5_ORYSJ, RecName: Full=Peroxisomal (S)-2-hydroxy-acid oxidase GLO5 EC=1.1.3.15 AltName: Full=Glycolate oxidase 5 Short=GOX 5 Short=OsGLO5 AltName: Full=Short chain alpha-hydroxy acid oxidase GLO5	-	2264.6	2264.6	2212.7	2486.7	2352.5	2718.8	0.892022	0.122615	-0.164849	Nonsignificant	None	3	Molecular Function:FMN binding (GO:0010181),Molecular Function:oxidoreductase activity (GO:0016491),Biological Process:oxidation-reduction process (GO:0055114)	(S)-2-hydroxy-acid oxidase	1.1.3.15	ko00630 Glyoxylate and dicarboxylate metabolism ko01100 Metabolic pathways ko01110 Biosynthesis of secondary metabolites ko01200 Carbon metabolism ko04146 Peroxisome	FMN-dependent dehydrogenase, includes L-lactate dehydrogenase and type II isopentenyl diphosphate isomerase	CIR	Energy production and conversion ; Lipid transport and metabolism ; General function prediction only ;
TRINITY_DN202019_c2_g1	ALFC5_ARATH, RecName: Full=Fructose-bisphosphate aldolase 5, cytosolic {ECO:0000305} Short=AtFBA5 {ECO:0000303|PubMed:22561114} EC=4.1.2.13 {ECO:0000250|UniProtKB:Q9SJQ9}	-	199.1	161.5	202.8	186.7	190.8	249.2	0.898995	0.438309	-0.153615	Nonsignificant	None	2	Molecular Function:fructose-bisphosphate aldolase activity (GO:0004332),Biological Process:glycolytic process (GO:0006096)	fructose-bisphosphate aldolase, class I	4.1.2.13	ko00010 Glycolysis / Gluconeogenesis ko00030 Pentose phosphate pathway ko00051 Fructose and mannose metabolism ko00710 Carbon fixation in photosynthetic organisms ko01100 Metabolic pathways ko01110 Biosynthesis of secondary metabolites ko01200 Carbon metabolism ko01230 Biosynthesis of amino acids	Fructose-bisphosphate aldolase class 1	G	Carbohydrate transport and metabolism ;
TRINITY_DN196749_c0_g1	PNSL5_ARATH, RecName: Full=Photosynthetic NDH subunit of lumenal location 5, chloroplastic {ECO:0000303|PubMed:21785130} AltName: Full=Cyclophilin of 20 kDa 2 AltName: Full=Peptidyl-prolyl cis-trans isomerase CYP20-2 Short=PPIase CYP20-2 EC=5.2.1.8 AltName: Full=Rotamase CYP20-2 AltName: Full=Thylakoid lumen PPIase of 20 kDa Short=TLP20 Flags: Precursor	-	1767.7	1685.9	1913	1956	1546.9	1805.1	1.01104	0.895057	0.01584	Nonsignificant	None	3	Biological Process:protein peptidyl-prolyl isomerization (GO:0000413),Molecular Function:peptidyl-prolyl cis-trans isomerase activity (GO:0003755),Biological Process:protein folding (GO:0006457)	peptidyl-prolyl cis-trans isomerase B (cyclophilin B)	5.2.1.8	--	Peptidyl-prolyl cis-trans isomerase (rotamase) - cyclophilin family	O	Posttranslational modification, protein turnover, chaperones ;
TRINITY_DN183780_c3_g1	VHAA3_ARATH, RecName: Full=V-type proton ATPase subunit a3 Short=V-ATPase subunit a3 AltName: Full=V-type proton ATPase 95 kDa subunit a isoform 3 Short=V-ATPase 95 kDa isoform a3 AltName: Full=Vacuolar H(+)-ATPase subunit a isoform 3 AltName: Full=Vacuolar proton pump subunit a3 AltName: Full=Vacuolar proton translocating ATPase 95 kDa subunit a isoform 3	-	1919.8	1872.7	1867	1851.1	1910.5	1780.4	1.0212	0.416931	0.0302679	Nonsignificant	None	2	Molecular Function:hydrogen ion transmembrane transporter activity (GO:0015078),Biological Process:ATP hydrolysis coupled proton transport (GO:0015991)	V-type H+-transporting ATPase subunit a	--	ko00190 Oxidative phosphorylation ko01100 Metabolic pathways ko04145 Phagosome	Archaeal/vacuolar-type H+-ATPase subunit I/STV1	C	Energy production and conversion ;
TRINITY_DN193618_c1_g1	MDAR5_ORYSJ, RecName: Full=Monodehydroascorbate reductase 5, chlorplastic {ECO:0000305} Short=OsMADR5 {ECO:0000303|PubMed:25546583} Short=OsMDHAR5 {ECO:0000303|PubMed:25546583} EC=1.6.5.4 {ECO:0000250|UniProtKB:Q652L6} Flags: Precursor	-	1875.8	2125.9	2007.4	2046.9	1656.5	1743.5	1.10321	0.261442	0.141714	Nonsignificant	None	2	Molecular Function:oxidoreductase activity (GO:0016491),Biological Process:oxidation-reduction process (GO:0055114)	monodehydroascorbate reductase (NADH)	1.6.5.4	ko00053 Ascorbate and aldarate metabolism ko01100 Metabolic pathways	NADPH-dependent 2,4-dienoyl-CoA reductase, sulfur reductase, or a related oxidoreductase	I	Lipid transport and metabolism ;
TRINITY_DN173394_c1_g2	PRS7B_ORYSJ, RecName: Full=26S proteasome regulatory subunit 7B AltName: Full=26S proteasome AAA-ATPase subunit RPT1B AltName: Full=26S proteasome subunit 7B AltName: Full=Regulatory particle triple-A ATPase subunit 1B	-	1867.6	1822.3	1824.9	1809	1896.2	1797	1.00229	0.911294	0.00329999	Nonsignificant	None	1	Molecular Function:ATP binding (GO:0005524)	26S proteasome regulatory subunit T1	--	ko03050 Proteasome	ATP-dependent 26S proteasome regulatory subunit	O	Posttranslational modification, protein turnover, chaperones ;
TRINITY_DN185741_c1_g1	CLPB1_ORYSJ, RecName: Full=Chaperone protein ClpB1 AltName: Full=ATP-dependent Clp protease ATP-binding subunit ClpB homolog 1 AltName: Full=Casein lytic proteinase B1 AltName: Full=Heat shock protein 101	-	22.3	21.3	22.2	17.2	18.5	13.9	1.32661	0.0522081	0.407747	Nonsignificant	None	1	Molecular Function:ATP binding (GO:0005524)	ATP-dependent Clp protease ATP-binding subunit ClpB	--		ATP-dependent Clp protease ATP-binding subunit ClpA	O	Posttranslational modification, protein turnover, chaperones ;
TRINITY_DN195415_c2_g2	PR2E1_ORYSJ, RecName: Full=Peroxiredoxin-2E-1, chloroplastic EC=1.11.1.15 AltName: Full=Peroxiredoxin IIE-1 AltName: Full=Thioredoxin peroxidase 2E-1 Flags: Precursor	-	1283.9	1423.7	1318.2	1621.9	1405.9	1219.1	0.947938	0.600756	-0.0771346	Nonsignificant	None	2	Molecular Function:oxidoreductase activity (GO:0016491),Biological Process:cell redox homeostasis (GO:0045454)	--	--	--	Peroxiredoxin	O	Posttranslational modification, protein turnover, chaperones ;
TRINITY_DN199781_c0_g1	TC159_ARATH, RecName: Full=Translocase of chloroplast 159, chloroplastic Short=AtToc159 EC=3.6.5.- AltName: Full=159 kDa chloroplast outer envelope protein AltName: Full=Plastid protein import 2 AltName: Full=Translocase of chloroplast 160, chloroplastic Short=AtToc160 AltName: Full=Translocase of chloroplast 86, chloroplastic Short=AtToc86	-	1891.7	1847.6	1807.4	1959.8	1813.2	1959.7	0.967555	0.340139	-0.0475851	Nonsignificant	None	1	Molecular Function:GTP binding (GO:0005525)	--	--	--	Predicted GTPase	R	General function prediction only ;
TRINITY_DN167772_c0_g2	GLO1_ARATH, RecName: Full=(S)-2-hydroxy-acid oxidase GLO1 EC=1.1.3.15 AltName: Full=Glycolate oxidase 1 Short=AtGLO1 Short=GOX 1 AltName: Full=Short chain alpha-hydroxy acid oxidase GLO1	-	1029.9	1037	1023.2	1124.9	1128.8	1177.8	0.90051	0.0174375	-0.151186	Nonsignificant	None	3	Molecular Function:FMN binding (GO:0010181),Molecular Function:oxidoreductase activity (GO:0016491),Biological Process:oxidation-reduction process (GO:0055114)	(S)-2-hydroxy-acid oxidase	1.1.3.15	ko00630 Glyoxylate and dicarboxylate metabolism ko01100 Metabolic pathways ko01110 Biosynthesis of secondary metabolites ko01200 Carbon metabolism ko04146 Peroxisome	FMN-dependent dehydrogenase, includes L-lactate dehydrogenase and type II isopentenyl diphosphate isomerase	CIR	Energy production and conversion ; Lipid transport and metabolism ; General function prediction only ;
TRINITY_DN195484_c1_g2	RGP1_ORYSJ, RecName: Full=UDP-arabinopyranose mutase 1 {ECO:0000303|PubMed:17182701} Short=OsUAM1 {ECO:0000303|PubMed:17182701} EC=5.4.99.30 {ECO:0000269|PubMed:17182701, ECO:0000269|PubMed:20057139, ECO:0000269|PubMed:20149347} AltName: Full=Reversibly glycosylated polypeptide 1 {ECO:0000303|PubMed:17182701} AltName: Full=UDP-L-arabinose mutase 1 {ECO:0000305}	-	2056.5	1922.7	1901.1	1882.3	1849.8	1893.3	1.04531	0.217517	0.0639341	Nonsignificant	None	2	Molecular Function:intramolecular transferase activity (GO:0016866),Biological Process:cellulose biosynthetic process (GO:0030244)	--	--	ko00520 Amino sugar and nucleotide sugar metabolism	Glycosyltransferase involved in cell wall bisynthesis	M	Cell wall/membrane/envelope biogenesis ;
TRINITY_DN201548_c4_g2	TSS_ARATH, RecName: Full=Protein TSS {ECO:0000303|PubMed:21185286} AltName: Full=TPR-domain suppressor of STIMPY {ECO:0000303|PubMed:21185286}	-	1117.5	1145.4	1107.7	1117.2	1153.7	1115	0.995481	0.777802	-0.00653394	Nonsignificant	None	1	Molecular Function:protein binding (GO:0005515)	protein TIF31	--	--	Putative Zn-dependent protease, contains TPR repeats	R	General function prediction only ;
TRINITY_DN191698_c1_g1	GLYC4_ARATH, RecName: Full=Serine hydroxymethyltransferase 4 Short=AtSHMT4 EC=2.1.2.1 AltName: Full=Glycine hydroxymethyltransferase 4 AltName: Full=Serine methylase 4	-	1729.8	1576.4	1520.5	1605.1	1740.6	1684.9	0.959468	0.418754	-0.0596933	Nonsignificant	None	1	Molecular Function:transferase activity (GO:0016740)	glycine hydroxymethyltransferase	2.1.2.1	ko00260 Glycine, serine and threonine metabolism ko00460 Cyanoamino acid metabolism ko00630 Glyoxylate and dicarboxylate metabolism ko00670 One carbon pool by folate ko01100 Metabolic pathways ko01110 Biosynthesis of secondary metabolites ko01200 Carbon metabolism ko01230 Biosynthesis of amino acids	Glycine/serine hydroxymethyltransferase	E	Amino acid transport and metabolism ;
TRINITY_DN198463_c3_g1	SEBP1_ARATH, RecName: Full=Selenium-binding protein 1	-	1488.3	1432.8	1475.9	1350.6	1458.1	1354	1.05629	0.143883	0.0789999	Nonsignificant	None	1	Molecular Function:selenium binding (GO:0008430)	selenium-binding protein 1	--	--	DNA-binding beta-propeller fold protein YncE	R	General function prediction only ;
TRINITY_DN185836_c0_g1	XYLA_HORVU, RecName: Full=Xylose isomerase EC=5.3.1.5	-	1389.3	1347.4	1389.9	1395.4	1289.3	1193.5	1.06405	0.289431	0.0895664	Nonsignificant	None	2	Biological Process:carbohydrate metabolic process (GO:0005975),Molecular Function:xylose isomerase activity (GO:0009045)	xylose isomerase	5.3.1.5	ko00040 Pentose and glucuronate interconversions ko00051 Fructose and mannose metabolism ko01100 Metabolic pathways	Xylose isomerase	G	Carbohydrate transport and metabolism ;
TRINITY_DN191138_c0_g1	NRX11_ORYSJ, RecName: Full=Probable nucleoredoxin 1-1 Short=OsNrx1-1 EC=1.8.1.8	-	394.3	332.1	335.8	338.1	339.7	354.5	1.02896	0.674255	0.0411931	Nonsignificant	None	1	Biological Process:cell redox homeostasis (GO:0045454)	nucleoredoxin	1.8.1.8	--	Thiol-disulfide isomerase or thioredoxin	O	Posttranslational modification, protein turnover, chaperones ;
TRINITY_DN192149_c1_g1	LGUL_ORYSJ, RecName: Full=Lactoylglutathione lyase EC=4.4.1.5 {ECO:0000269|PubMed:11139585} AltName: Full=Aldoketomutase AltName: Full=Allergen Glb33 AltName: Full=Glyoxalase I Short=Glx I AltName: Full=Glyoxylase I 11 {ECO:0000305} Short=OsGLYI-11 {ECO:0000303|PubMed:24661284} Short=OsGLYI11 {ECO:0000303|PubMed:21213008} AltName: Full=Ketone-aldehyde mutase AltName: Full=Methylglyoxalase AltName…	-	118.5	144.5	160.6	148.4	168.4	154.7	0.898409	0.328625	-0.154555	Nonsignificant	None	--	--	lactoylglutathione lyase	4.4.1.5	ko00620 Pyruvate metabolism	Catechol 2,3-dioxygenase or other lactoylglutathione lyase family enzyme	Q	Secondary metabolites biosynthesis, transport and catabolism ;
TRINITY_DN185540_c0_g1	K502_ACTDE, RecName: Full=Fruit protein pKIWI502	-	1452.6	1491.3	1498.5	1470.1	1489.3	1572	0.980359	0.455555	-0.0286175	Nonsignificant	None	2	Molecular Function:oxidoreductase activity (GO:0016491),Biological Process:oxidation-reduction process (GO:0055114)	--	--	--	NAD(P)H-flavin reductase	HC	Coenzyme transport and metabolism ; Energy production and conversion ;
TRINITY_DN198018_c2_g1	AGLU_ORYSJ, RecName: Full=Probable alpha-glucosidase Os06g0675700 EC=3.2.1.20 AltName: Full=Maltase Flags: Precursor	-	155.8	156.3	157.6	154.3	162	148.3	1.01098	0.710974	0.0157504	Nonsignificant	None	1	Biological Process:carbohydrate metabolic process (GO:0005975)	alpha-glucosidase	3.2.1.20	ko00052 Galactose metabolism ko00500 Starch and sucrose metabolism ko01100 Metabolic pathways	Alpha-glucosidase, glycosyl hydrolase family GH31	G	Carbohydrate transport and metabolism ;
TRINITY_DN187760_c0_g1	SERA2_ARATH, RecName: Full=D-3-phosphoglycerate dehydrogenase 2, chloroplastic Short=PGDH EC=1.1.1.95 {ECO:0000269|PubMed:24368794, ECO:0000269|PubMed:9867856} Flags: Precursor	-	1719.3	1788	1810.7	1732.7	1656	1563.1	1.07395	0.114162	0.102931	Nonsignificant	None	4	Biological Process:metabolic process (GO:0008152),Molecular Function:amino acid binding (GO:0016597),Molecular Function:NAD binding (GO:0051287),Biological Process:oxidation-reduction process (GO:0055114)	--	--	ko00260 Glycine, serine and threonine metabolism ko01100 Metabolic pathways ko01200 Carbon metabolism ko01230 Biosynthesis of amino acids	Predicted regulator of amino acid metabolism, contains ACT domain	R	General function prediction only ;
TRINITY_DN194807_c0_g3	TCPQ_ARATH, RecName: Full=T-complex protein 1 subunit theta {ECO:0000303|PubMed:11599560} Short=TCP-1-theta {ECO:0000303|PubMed:11599560} AltName: Full=CCT-theta {ECO:0000303|PubMed:11599560} AltName: Full=Chaperonin CCT8 {ECO:0000303|PubMed:21868675} AltName: Full=Chaperonin containing TCP1 8 {ECO:0000303|PubMed:21868675} AltName: Full=TCP1-ring complex {ECO:0000303|PubMed:21868675}	-	1402.8	1411	1388	1475.7	1417.6	1309.4	0.999786	0.995669	-0.000308983	Nonsignificant	None	1	Molecular Function:ATP binding (GO:0005524)	T-complex protein 1 subunit theta	--	--	Chaperonin GroEL (HSP60 family)	O	Posttranslational modification, protein turnover, chaperones ;
TRINITY_DN197087_c1_g1	NIR_ORYSJ, RecName: Full=Ferredoxin--nitrite reductase, chloroplastic EC=1.7.7.1 Flags: Precursor	-	1895.7	2128.1	2107.5	1916.1	2033.2	3312.1	0.844369	0.489336	-0.244055	Nonsignificant	None	4	Molecular Function:oxidoreductase activity (GO:0016491),Molecular Function:heme binding (GO:0020037),Molecular Function:iron-sulfur cluster binding (GO:0051536),Biological Process:oxidation-reduction process (GO:0055114)	ferredoxin-nitrite reductase	1.7.7.1	ko00910 Nitrogen metabolism	Ferredoxin-NADP reductase	C	Energy production and conversion ;
TRINITY_DN201196_c2_g1	ENO1_MAIZE, RecName: Full=Enolase 1 EC=4.2.1.11 AltName: Full=2-phospho-D-glycerate hydro-lyase 1 AltName: Full=2-phosphoglycerate dehydratase 1	-	133.5	130.9	148.3	155.4	164.8	134.4	0.907831	0.268049	-0.139504	Nonsignificant	None	4	Cellular Component:phosphopyruvate hydratase complex (GO:0000015),Molecular Function:magnesium ion binding (GO:0000287),Molecular Function:phosphopyruvate hydratase activity (GO:0004634),Biological Process:glycolytic process (GO:0006096)	enolase	4.2.1.11	ko00010 Glycolysis / Gluconeogenesis ko01100 Metabolic pathways ko01110 Biosynthesis of secondary metabolites ko01200 Carbon metabolism ko01230 Biosynthesis of amino acids ko03018 RNA degradation	Enolase	G	Carbohydrate transport and metabolism ;
TRINITY_DN198729_c1_g1	BADH2_ORYSJ, RecName: Full=Betaine aldehyde dehydrogenase 2 Short=OsBADH2 EC=1.2.1.8	-	22.7	25.4	20.1	21.7	24.9	20.5	1.01639	0.864738	0.023459	Nonsignificant	None	3	Biological Process:metabolic process (GO:0008152),Molecular Function:oxidoreductase activity (GO:0016491),Biological Process:oxidation-reduction process (GO:0055114)	betaine-aldehyde dehydrogenase	1.2.1.8	ko00260 Glycine, serine and threonine metabolism ko01100 Metabolic pathways	Acyl-CoA reductase or other NAD-dependent aldehyde dehydrogenase	C	Energy production and conversion ;
TRINITY_DN194459_c0_g1	AL121_ARATH, RecName: Full=Delta-1-pyrroline-5-carboxylate dehydrogenase 12A1, mitochondrial Short=AtP5CDH Short=P5C dehydrogenase EC=1.2.1.88 AltName: Full=Aldehyde dehydrogenase family 12 member A1 AltName: Full=L-glutamate gamma-semialdehyde dehydrogenase Flags: Precursor	-	2078	2095.3	1807	2106.7	1891.3	1728.8	1.04427	0.589221	0.0624886	Nonsignificant	None	3	Biological Process:metabolic process (GO:0008152),Molecular Function:oxidoreductase activity (GO:0016491),Biological Process:oxidation-reduction process (GO:0055114)	1-pyrroline-5-carboxylate dehydrogenase	1.2.1.88	ko00250 Alanine, aspartate and glutamate metabolism ko00330 Arginine and proline metabolism ko01100 Metabolic pathways	Acyl-CoA reductase or other NAD-dependent aldehyde dehydrogenase	C	Energy production and conversion ;
TRINITY_DN199477_c1_g4	AMY3_ARATH, RecName: Full=Alpha-amylase 3, chloroplastic {ECO:0000303|PubMed:15637061} Short=AtAMY3 {ECO:0000303|PubMed:15637061} EC=3.2.1.1 {ECO:0000269|PubMed:24089528} AltName: Full=1,4-alpha-D-glucan glucanohydrolase Flags: Precursor	-	1795.3	1706	2003.3	1968.2	2047.6	2259.3	0.877213	0.106511	-0.189001	Nonsignificant	None	4	Molecular Function:catalytic activity (GO:0003824),Molecular Function:alpha-amylase activity (GO:0004556),Molecular Function:calcium ion binding (GO:0005509),Biological Process:carbohydrate metabolic process (GO:0005975)	--	--	--	Glycosidase	G	Carbohydrate transport and metabolism ;
TRINITY_DN193073_c0_g3	PSAE_HORVU, RecName: Full=Photosystem I reaction center subunit IV, chloroplastic Short=PSI-E AltName: Full=Photosystem I 10.8 kDa polypeptide Flags: Precursor	-	1425.5	1632.4	1808.8	1685.6	1078.4	1855	1.05363	0.77311	0.0753633	Nonsignificant	None	3	Cellular Component:photosystem I (GO:0009522),Cellular Component:photosystem I reaction center (GO:0009538),Biological Process:photosynthesis (GO:0015979)	photosystem I subunit IV	--	ko00195 Photosynthesis ko01100 Metabolic pathways	--	--	--
TRINITY_DN188614_c2_g5	TBB4_WHEAT, RecName: Full=Tubulin beta-4 chain AltName: Full=Beta-4-tubulin	-	2118.8	1847.5	1866.4	2025.8	2150.1	2082.5	0.931979	0.241621	-0.10163	Nonsignificant	None	5	Molecular Function:GTPase activity (GO:0003924),Molecular Function:structural constituent of cytoskeleton (GO:0005200),Molecular Function:GTP binding (GO:0005525),Cellular Component:microtubule (GO:0005874),Biological Process:microtubule-based process (GO:0007017)	tubulin beta	--	ko04145 Phagosome	--	--	--
TRINITY_DN188449_c0_g1	GATB_ORYSJ, RecName: Full=Glutamyl-tRNA(Gln) amidotransferase subunit B, chloroplastic/mitochondrial {ECO:0000255|HAMAP-Rule:MF_03147} Short=Glu-AdT subunit B {ECO:0000255|HAMAP-Rule:MF_03147} EC=6.3.5.- {ECO:0000255|HAMAP-Rule:MF_03147}	-	1885.9	1853.5	1744.6	1646.5	1735.6	2046.6	1.01019	0.896803	0.0146218	Nonsignificant	None	1	Molecular Function:ligase activity (GO:0016874)	--	--	ko00970 Aminoacyl-tRNA biosynthesis ko01100 Metabolic pathways	Asp-tRNAAsn/Glu-tRNAGln amidotransferase B subunit	J	Translation, ribosomal structure and biogenesis ;
TRINITY_DN188199_c0_g1	PSBS_SPIOL, RecName: Full=Photosystem II 22 kDa protein, chloroplastic AltName: Full=CP22 Flags: Precursor	-	3712.1	4157.9	3826.5	4164.3	3967.8	4146.4	0.9526	0.284959	-0.0700574	Nonsignificant	None	--	--	photosystem II 22kDa protein	--	ko00195 Photosynthesis ko01100 Metabolic pathways	--	--	--
TRINITY_DN193469_c3_g3	FKB70_WHEAT, RecName: Full=70 kDa peptidyl-prolyl isomerase EC=5.2.1.8 AltName: Full=Peptidyl-prolyl cis-trans isomerase Short=PPIase AltName: Full=Rotamase	-	2491	2452.9	2495	2532.7	2396.5	2317.4	1.02654	0.416219	0.037785	Nonsignificant	None	1	Molecular Function:protein binding (GO:0005515)	FK506-binding protein 4/5	5.2.1.8		FKBP-type peptidyl-prolyl cis-trans isomerase	O	Posttranslational modification, protein turnover, chaperones ;
TRINITY_DN177224_c0_g1	--	-	1804	1552.7	1246.9	1923.1	1789.3	1184.8	0.940047	0.744782	-0.0891946	Nonsignificant	None	2	Molecular Function:aspartic-type endopeptidase activity (GO:0004190),Biological Process:proteolysis (GO:0006508)	--	--	--	--	--	--
TRINITY_DN176030_c0_g2	METK1_TRIMO, RecName: Full=S-adenosylmethionine synthase 1 Short=AdoMet synthase 1 EC=2.5.1.6 {ECO:0000250|UniProtKB:Q96551} AltName: Full=Methionine adenosyltransferase 1 Short=MAT 1	-	1125.4	948.1	984.6	911.8	922.6	1244.9	0.993115	0.957511	-0.00996685	Nonsignificant	None	3	Molecular Function:methionine adenosyltransferase activity (GO:0004478),Molecular Function:ATP binding (GO:0005524),Biological Process:S-adenosylmethionine biosynthetic process (GO:0006556)	S-adenosylmethionine synthetase	2.5.1.6	ko00270 Cysteine and methionine metabolism ko01100 Metabolic pathways ko01110 Biosynthesis of secondary metabolites ko01230 Biosynthesis of amino acids	S-adenosylmethionine synthetase	H	Coenzyme transport and metabolism ;
TRINITY_DN199996_c4_g1	HEM2_ORYSJ, RecName: Full=Delta-aminolevulinic acid dehydratase, chloroplastic Short=ALADH EC=4.2.1.24 AltName: Full=Porphobilinogen synthase Flags: Precursor	-	1187.3	1101.2	1124.3	1081.6	1236.9	1250.8	0.956154	0.451654	-0.0646853	Nonsignificant	None	3	Molecular Function:porphobilinogen synthase activity (GO:0004655),Biological Process:tetrapyrrole biosynthetic process (GO:0033014),Molecular Function:metal ion binding (GO:0046872)	porphobilinogen synthase	4.2.1.24	ko00860 Porphyrin and chlorophyll metabolism ko01100 Metabolic pathways ko01110 Biosynthesis of secondary metabolites	Delta-aminolevulinic acid dehydratase, porphobilinogen synthase	H	Coenzyme transport and metabolism ;
TRINITY_DN186860_c1_g2	EF1D_PIMBR, RecName: Full=Elongation factor 1-delta Short=EF-1-delta AltName: Full=Elongation factor 1B-beta AltName: Full=eEF-1B beta	-	1172.5	1111.9	1163.9	1208.3	1205.3	1113.7	0.977603	0.516818	-0.032679	Nonsignificant	None	2	Molecular Function:translation elongation factor activity (GO:0003746),Biological Process:translational elongation (GO:0006414)	elongation factor 1-beta	--	--	--	--	--
TRINITY_DN184324_c0_g2	VDAC5_ORYSJ, RecName: Full=Mitochondrial outer membrane protein porin 5 AltName: Full=Voltage-dependent anion-selective channel protein 5 Short=OsVDAC5	-	1555.8	1557.1	1595.6	1583.4	1511.5	1547.7	1.01419	0.429713	0.0203345	Nonsignificant	None	2	Cellular Component:mitochondrial outer membrane (GO:0005741),Biological Process:transmembrane transport (GO:0055085)	voltage-dependent anion channel protein 2	--		--	--	--
TRINITY_DN183048_c1_g1	DJ1B_ARATH, RecName: Full=Protein DJ-1 homolog B Short=AtDJ1B Flags: Precursor	-	1833.9	1724.4	1641.5	1672	1677.9	1702.7	1.02913	0.472469	0.0414302	Nonsignificant	None	--	--	protein deglycase	3.5.1.124	--	Putative intracellular protease/amidase	R	General function prediction only ;
TRINITY_DN178585_c2_g2	GAPN_WHEAT, RecName: Full=NADP-dependent glyceraldehyde-3-phosphate dehydrogenase EC=1.2.1.9 AltName: Full=Glyceraldehyde-3-phosphate dehydrogenase [NADP(+)] AltName: Full=Non-phosphorylating glyceraldehyde 3-phosphate dehydrogenase AltName: Full=Triosephosphate dehydrogenase	-	198.7	206.5	200.1	190.5	190.5	207.1	1.02925	0.418262	0.0415889	Nonsignificant	None	3	Biological Process:metabolic process (GO:0008152),Molecular Function:oxidoreductase activity (GO:0016491),Biological Process:oxidation-reduction process (GO:0055114)	glyceraldehyde-3-phosphate dehydrogenase (NADP+)	1.2.1.9	ko00010 Glycolysis / Gluconeogenesis ko00030 Pentose phosphate pathway ko01100 Metabolic pathways ko01200 Carbon metabolism	Acyl-CoA reductase or other NAD-dependent aldehyde dehydrogenase	C	Energy production and conversion ;
TRINITY_DN201037_c1_g1	LGUC_ARATH, RecName: Full=Probable lactoylglutathione lyase, chloroplastic EC=4.4.1.5 AltName: Full=Glyoxalase I Flags: Precursor	-	1691.2	1766.7	1724.7	1750.7	1932.2	1810	0.943509	0.183065	-0.083892	Nonsignificant	None	--	--	lactoylglutathione lyase	4.4.1.5	ko00620 Pyruvate metabolism	Catechol 2,3-dioxygenase or other lactoylglutathione lyase family enzyme	Q	Secondary metabolites biosynthesis, transport and catabolism ;
TRINITY_DN201974_c1_g1	PSBA_AGRST, RecName: Full=Photosystem II protein D1 {ECO:0000255|HAMAP-Rule:MF_01379} Short=PSII D1 protein {ECO:0000255|HAMAP-Rule:MF_01379} EC=1.10.3.9 {ECO:0000255|HAMAP-Rule:MF_01379} AltName: Full=Photosystem II Q(B) protein {ECO:0000255|HAMAP-Rule:MF_01379} Flags: Precursor	-	3223.9	3249.7	3313.6	3123.5	3196.6	3103.1	1.03863	0.0358633	0.0546791	Nonsignificant	None	1	Biological Process:photosynthetic electron transport in photosystem II (GO:0009772)	photosystem II P680 reaction center D1 protein	1.10.3.9	ko00195 Photosynthesis ko01100 Metabolic pathways	--	--	--
TRINITY_DN187129_c2_g1	ALFP_ORYSJ, RecName: Full=Fructose-bisphosphate aldolase, chloroplastic {ECO:0000305} EC=4.1.2.13 {ECO:0000305} AltName: Full=Chloroplastic aldolase {ECO:0000303|PubMed:8163192} Short=AldP {ECO:0000303|PubMed:8163192} Flags: Precursor	-	1054.5	1304.1	1183.3	1227.1	1184.1	1422.2	0.923958	0.397939	-0.114101	Nonsignificant	None	2	Molecular Function:fructose-bisphosphate aldolase activity (GO:0004332),Biological Process:glycolytic process (GO:0006096)	fructose-bisphosphate aldolase, class I	4.1.2.13	ko00010 Glycolysis / Gluconeogenesis ko00030 Pentose phosphate pathway ko00051 Fructose and mannose metabolism ko00710 Carbon fixation in photosynthetic organisms ko01100 Metabolic pathways ko01110 Biosynthesis of secondary metabolites ko01200 Carbon metabolism ko01230 Biosynthesis of amino acids	Fructose-bisphosphate aldolase class 1	G	Carbohydrate transport and metabolism ;
TRINITY_DN201934_c0_g1	ALDO2_MAIZE, RecName: Full=Indole-3-acetaldehyde oxidase Short=IAA oxidase EC=1.2.3.7 AltName: Full=Aldehyde oxidase-2 Short=ZmAO-2	-	1631.3	1624.1	1660.8	1485.2	1500.9	1400.7	1.12068	0.0199317	0.164375	Nonsignificant	None	7	Molecular Function:catalytic activity (GO:0003824),Molecular Function:electron carrier activity (GO:0009055),Molecular Function:oxidoreductase activity (GO:0016491),Molecular Function:metal ion binding (GO:0046872),Molecular Function:flavin adenine dinucleotide binding (GO:0050660),Molecular Function:iron-sulfur cluster binding (GO:0051536),Biological Process:oxidation-reduction process (GO:00551…	indole-3-acetaldehyde oxidase	1.2.3.7	ko00380 Tryptophan metabolism	Xanthine dehydrogenase, molybdopterin-binding subunit B	F	Nucleotide transport and metabolism ;
TRINITY_DN201862_c0_g3	S17P_WHEAT, RecName: Full=Sedoheptulose-1,7-bisphosphatase, chloroplastic EC=3.1.3.37 AltName: Full=SED(1,7)P2ase AltName: Full=Sedoheptulose bisphosphatase Short=SBPase Flags: Precursor	-	400.4	519.8	427.3	431.2	402.4	509.5	1.00328	0.977244	0.00471855	Nonsignificant	None	2	Biological Process:carbohydrate metabolic process (GO:0005975),Molecular Function:phosphatase activity (GO:0016791)	sedoheptulose-bisphosphatase	3.1.3.37	ko00710 Carbon fixation in photosynthetic organisms ko01100 Metabolic pathways ko01200 Carbon metabolism	Fructose-1,6-bisphosphatase	G	Carbohydrate transport and metabolism ;
TRINITY_DN195459_c0_g1	RR1_SPIOL, RecName: Full=30S ribosomal protein S1, chloroplastic {ECO:0000303|PubMed:10874039} AltName: Full=CS1 AltName: Full=Chloroplastic small ribosomal subunit protein bS1c {ECO:0000303|PubMed:28007896} Flags: Precursor	-	2158.8	1980.1	2050.4	2222.8	2273.4	2290.4	0.911988	0.0473201	-0.132913	Nonsignificant	None	1	Molecular Function:nucleic acid binding (GO:0003676)	small subunit ribosomal protein S1	--	ko03010 Ribosome	Ribosomal protein S1	J	Translation, ribosomal structure and biogenesis ;
TRINITY_DN181089_c0_g1	RBS2_WHEAT, RecName: Full=Ribulose bisphosphate carboxylase small chain PW9, chloroplastic Short=RuBisCO small subunit PW9 EC=4.1.1.39 Flags: Precursor	-	14384.2	16679	16616.9	15124.8	16038.1	20107.8	0.929968	0.535128	-0.104747	Nonsignificant	None	--	--	ribulose-bisphosphate carboxylase small chain	4.1.1.39	ko00630 Glyoxylate and dicarboxylate metabolism ko00710 Carbon fixation in photosynthetic organisms ko01100 Metabolic pathways ko01200 Carbon metabolism	Ribulose bisphosphate carboxylase small subunit	G	Carbohydrate transport and metabolism ;
TRINITY_DN176455_c1_g1	ENO2_MAIZE, RecName: Full=Enolase 2 EC=4.2.1.11 AltName: Full=2-phospho-D-glycerate hydro-lyase 2 AltName: Full=2-phosphoglycerate dehydratase 2	-	368.3	402.3	398.7	396.5	407.5	345.9	1.01687	0.785302	0.0241367	Nonsignificant	None	4	Cellular Component:phosphopyruvate hydratase complex (GO:0000015),Molecular Function:magnesium ion binding (GO:0000287),Molecular Function:phosphopyruvate hydratase activity (GO:0004634),Biological Process:glycolytic process (GO:0006096)	enolase	4.2.1.11	ko00010 Glycolysis / Gluconeogenesis ko01100 Metabolic pathways ko01110 Biosynthesis of secondary metabolites ko01200 Carbon metabolism ko01230 Biosynthesis of amino acids ko03018 RNA degradation	Enolase	G	Carbohydrate transport and metabolism ;
TRINITY_DN192289_c1_g1	AL2C4_ARATH, RecName: Full=Aldehyde dehydrogenase family 2 member C4 EC=1.2.1.3 AltName: Full=ALDH1a AltName: Full=Protein REDUCED EPIDERMAL FLUORESCENCE 1	-	1535.3	1603.3	1719.8	2045.2	1398.5	1228.5	1.03985	0.828355	0.0563792	Nonsignificant	None	3	Biological Process:metabolic process (GO:0008152),Molecular Function:oxidoreductase activity (GO:0016491),Biological Process:oxidation-reduction process (GO:0055114)	coniferyl-aldehyde dehydrogenase	1.2.1.68	ko00940 Phenylpropanoid biosynthesis	Acyl-CoA reductase or other NAD-dependent aldehyde dehydrogenase	C	Energy production and conversion ;
TRINITY_DN200620_c0_g1	IF2C_ARATH, RecName: Full=Translation initiation factor IF-2, chloroplastic Flags: Precursor	-	1751.4	1666.4	1714.5	1815.8	1731.2	1882.9	0.945192	0.139014	-0.0813201	Nonsignificant	None	2	Molecular Function:GTPase activity (GO:0003924),Molecular Function:GTP binding (GO:0005525)	translation initiation factor IF-2	--	--	Cell division protein DamX, binds to the septal ring, contains C-terminal SPOR domain	D	Cell cycle control, cell division, chromosome partitioning ;
TRINITY_DN188167_c0_g1	MDHP_ARATH, RecName: Full=Malate dehydrogenase, chloroplastic {ECO:0000305} EC=1.1.1.37 AltName: Full=Chloroplastic malate dehydrogenase {ECO:0000303|PubMed:20876337} Short=Chloroplastic MDH {ECO:0000305} Short=cpNAD-MDH {ECO:0000303|PubMed:20876337} AltName: Full=Plastidic NAD-dependent malate dehydrogenase {ECO:0000305} Short=pNAD-MDH {ECO:0000305} Flags: Precursor	-	1552.8	1661	1615.5	1735.1	1606.1	1517.7	0.993908	0.897738	-0.00881565	Nonsignificant	None	2	Molecular Function:oxidoreductase activity (GO:0016491),Biological Process:oxidation-reduction process (GO:0055114)	malate dehydrogenase	1.1.1.37	ko00020 Citrate cycle (TCA cycle) ko00270 Cysteine and methionine metabolism ko00620 Pyruvate metabolism ko00630 Glyoxylate and dicarboxylate metabolism ko00710 Carbon fixation in photosynthetic organisms ko01100 Metabolic pathways ko01110 Biosynthesis of secondary metabolites ko01200 Carbon metabolism	Malate/lactate dehydrogenase	C	Energy production and conversion ;
TRINITY_DN190047_c0_g3	EF1D_PIMBR, RecName: Full=Elongation factor 1-delta Short=EF-1-delta AltName: Full=Elongation factor 1B-beta AltName: Full=eEF-1B beta	-	168.7	171.3	184.1	192.5	156.2	168.6	1.01315	0.859337	0.0188409	Nonsignificant	None	2	Molecular Function:translation elongation factor activity (GO:0003746),Biological Process:translational elongation (GO:0006414)	elongation factor 1-beta	--	--	--	--	--
TRINITY_DN200283_c1_g2	MDAR3_ORYSJ, RecName: Full=Monodehydroascorbate reductase 3, cytosolic {ECO:0000305} Short=OsMDAR3 {ECO:0000303|PubMed:25546583} Short=OsMDHAR3 {ECO:0000303|PubMed:25546583} EC=1.6.5.4 {ECO:0000269|PubMed:24376554, ECO:0000269|PubMed:27652777}	-	1449.3	1577.3	1519.7	1543	1538.1	1425.2	1.00888	0.815105	0.0127495	Nonsignificant	None	2	Molecular Function:oxidoreductase activity (GO:0016491),Biological Process:oxidation-reduction process (GO:0055114)	monodehydroascorbate reductase (NADH)	1.6.5.4	ko00053 Ascorbate and aldarate metabolism ko01100 Metabolic pathways	NADPH-dependent 2,4-dienoyl-CoA reductase, sulfur reductase, or a related oxidoreductase	I	Lipid transport and metabolism ;
TRINITY_DN196981_c4_g2	RL4A_ARATH, RecName: Full=60S ribosomal protein L4-1 Short=L1	-	473.3	440.1	463.1	454.6	485.4	444.2	0.994437	0.879161	-0.0080478	Nonsignificant	None	3	Molecular Function:structural constituent of ribosome (GO:0003735),Cellular Component:ribosome (GO:0005840),Biological Process:translation (GO:0006412)	large subunit ribosomal protein L4e	--	ko03010 Ribosome	Ribosomal protein L4	J	Translation, ribosomal structure and biogenesis ;
TRINITY_DN185162_c1_g1	CP41B_ARATH, RecName: Full=Chloroplast stem-loop binding protein of 41 kDa b, chloroplastic Short=CSP41-b AltName: Full=Heteroglycan-interacting protein 1.3 AltName: Full=Protein CHLOROPLAST RNA BINDING AltName: Full=Protein Gb5f Flags: Precursor	-	2992.4	3106.4	2839.1	2929.9	2881.6	3562.1	0.953518	0.584652	-0.0686673	Nonsignificant	None	--	--	--	--	--	Nucleoside-diphosphate-sugar epimerase	M	Cell wall/membrane/envelope biogenesis ;
TRINITY_DN173843_c1_g1	H4_SOYBN, RecName: Full=Histone H4	-	3598.1	3498.1	3563.8	3715.9	3687.3	3081.8	1.01669	0.805327	0.0238806	Nonsignificant	None	3	Cellular Component:nucleosome (GO:0000786),Molecular Function:DNA binding (GO:0003677),Cellular Component:nucleus (GO:0005634)	histone H4	--		--	--	--
TRINITY_DN193964_c0_g2	PGMP_PEA, RecName: Full=Phosphoglucomutase, chloroplastic Short=PGM EC=5.4.2.2 AltName: Full=Glucose phosphomutase Flags: Precursor	-	910.2	1257.5	1076.7	1331.7	1389	1109.4	0.84708	0.213973	-0.23943	Nonsignificant	None	2	Biological Process:carbohydrate metabolic process (GO:0005975),Biological Process:organic substance metabolic process (GO:0071704)	phosphoglucomutase	5.4.2.2	ko00010 Glycolysis / Gluconeogenesis ko00030 Pentose phosphate pathway ko00052 Galactose metabolism ko00230 Purine metabolism ko00500 Starch and sucrose metabolism ko00520 Amino sugar and nucleotide sugar metabolism ko01100 Metabolic pathways ko01110 Biosynthesis of secondary metabolites	Phosphoglucomutase	G	Carbohydrate transport and metabolism ;
TRINITY_DN197381_c1_g2	CISY4_ARATH, RecName: Full=Citrate synthase 4, mitochondrial EC=2.3.3.16 Flags: Precursor	-	313.9	328.2	314	330.9	393.9	290.4	0.941785	0.581624	-0.0865305	Nonsignificant	None	--	--	citrate synthase	2.3.3.1	ko00020 Citrate cycle (TCA cycle) ko00630 Glyoxylate and dicarboxylate metabolism ko01100 Metabolic pathways ko01110 Biosynthesis of secondary metabolites ko01200 Carbon metabolism ko01210 2-Oxocarboxylic acid metabolism ko01230 Biosynthesis of amino acids	Citrate synthase	C	Energy production and conversion ;
TRINITY_DN196035_c4_g2	ASPR1_ORYSJ, RecName: Full=Aspartic proteinase oryzasin-1 EC=3.4.23.- Flags: Precursor	-	990.2	841.2	845.2	873.1	855.9	771.9	1.07025	0.38002	0.0979542	Nonsignificant	None	3	Molecular Function:aspartic-type endopeptidase activity (GO:0004190),Biological Process:proteolysis (GO:0006508),Biological Process:lipid metabolic process (GO:0006629)	phytepsin	3.4.23.40	--	--	--	--
TRINITY_DN174159_c1_g3	GRP1_SINAL, RecName: Full=Glycine-rich RNA-binding protein GRP1A	-	851.1	749.6	825.3	830.6	857.5	819.3	0.967536	0.474873	-0.0476126	Nonsignificant	None	1	Molecular Function:nucleic acid binding (GO:0003676)	--	--	--	RNA recognition motif (RRM) domain	J	Translation, ribosomal structure and biogenesis ;
TRINITY_DN198056_c2_g1	IM30_ORYSJ, RecName: Full=Probable membrane-associated 30 kDa protein, chloroplastic Flags: Precursor	-	544.1	551.1	563	556.4	567.1	595.8	0.964462	0.220006	-0.0522033	Nonsignificant	None	--	--	phage shock protein A	--	--	Phage shock protein A	KT	Transcription ; Signal transduction mechanisms ;
TRINITY_DN194342_c2_g1	CRD1_HORVU, RecName: Full=Magnesium-protoporphyrin IX monomethyl ester [oxidative] cyclase, chloroplastic Short=Mg-protoporphyrin IX monomethyl ester oxidative cyclase EC=1.14.13.81 AltName: Full=Protein Xantha-l Flags: Precursor	-	330.5	338.5	299.6	347.8	302.7	323.7	0.994252	0.920769	-0.00831698	Nonsignificant	None	6	Biological Process:photosynthesis (GO:0015979),Biological Process:chlorophyll biosynthetic process (GO:0015995),Molecular Function:oxidoreductase activity (GO:0016491),Molecular Function:metal ion binding (GO:0046872),Molecular Function:magnesium-protoporphyrin IX monomethyl ester (oxidative) cyclase activity (GO:0048529),Biological Process:oxidation-reduction process (GO:0055114)	magnesium-protoporphyrin IX monomethyl ester (oxidative) cyclase	1.14.13.81	ko00860 Porphyrin and chlorophyll metabolism ko01100 Metabolic pathways ko01110 Biosynthesis of secondary metabolites	Ribonucleotide reductase beta subunit, ferritin-like domain	F	Nucleotide transport and metabolism ;
TRINITY_DN179580_c0_g2	CLPC2_ORYSJ, RecName: Full=Chaperone protein ClpC2, chloroplastic AltName: Full=ATP-dependent Clp protease ATP-binding subunit ClpC homolog 2 AltName: Full=Casein lytic proteinase C2 Flags: Precursor	-	611.1	626.6	634.7	636.4	607.4	622.2	1.00343	0.854217	0.00493968	Nonsignificant	None	1	Biological Process:protein metabolic process (GO:0019538)	ATP-dependent Clp protease ATP-binding subunit ClpC	--	ko01100 Metabolic pathways	ATP-dependent Clp protease ATP-binding subunit ClpA	O	Posttranslational modification, protein turnover, chaperones ;
TRINITY_DN198420_c0_g1	RUBA_WHEAT, RecName: Full=RuBisCO large subunit-binding protein subunit alpha, chloroplastic AltName: Full=60 kDa chaperonin subunit alpha AltName: Full=CPN-60 alpha Flags: Precursor Fragment	-	51.2	57	54.3	59.3	62.6	63.8	0.875067	0.0246119	-0.192534	Nonsignificant	None	1	Molecular Function:ATP binding (GO:0005524)	--	--	--	Chaperonin GroEL (HSP60 family)	O	Posttranslational modification, protein turnover, chaperones ;
TRINITY_DN182581_c0_g2	LEA19_ORYSI, RecName: Full=Late embryogenesis abundant protein 19 {ECO:0000305} Short=OsLEA19 {ECO:0000305} AltName: Full=Late embryogenesis abundant protein, group 3 {ECO:0000305} Short=LEA-3 {ECO:0000305} AltName: Full=OsLEA3-1 {ECO:0000303|PubMed:17426956}	-	1031.4	1514	1299.9	1686.8	1336.9	1192.1	0.912116	0.575179	-0.13271	Nonsignificant	None	--	--	--	--	--	--	--	--
TRINITY_DN191480_c1_g1	CLPB1_ORYSJ, RecName: Full=Chaperone protein ClpB1 AltName: Full=ATP-dependent Clp protease ATP-binding subunit ClpB homolog 1 AltName: Full=Casein lytic proteinase B1 AltName: Full=Heat shock protein 101	-	1696.6	1548.1	1486.3	1684.8	1588.6	1400.7	1.01217	0.865064	0.0174566	Nonsignificant	None	2	Molecular Function:ATP binding (GO:0005524),Biological Process:protein metabolic process (GO:0019538)	ATP-dependent Clp protease ATP-binding subunit ClpB	--		ATP-dependent Clp protease ATP-binding subunit ClpA	O	Posttranslational modification, protein turnover, chaperones ;
TRINITY_DN201897_c0_g3	S17P_WHEAT, RecName: Full=Sedoheptulose-1,7-bisphosphatase, chloroplastic EC=3.1.3.37 AltName: Full=SED(1,7)P2ase AltName: Full=Sedoheptulose bisphosphatase Short=SBPase Flags: Precursor	-	2556	2886.2	2534.8	2840.3	2818.5	3016.5	0.919507	0.167729	-0.121067	Nonsignificant	None	2	Biological Process:carbohydrate metabolic process (GO:0005975),Molecular Function:phosphatase activity (GO:0016791)	sedoheptulose-bisphosphatase	3.1.3.37	ko00710 Carbon fixation in photosynthetic organisms ko01100 Metabolic pathways ko01200 Carbon metabolism	Fructose-1,6-bisphosphatase	G	Carbohydrate transport and metabolism ;
TRINITY_DN200039_c1_g3	CATA2_HORVU, RecName: Full=Catalase isozyme 2 EC=1.11.1.6	-	2912.8	2666.3	2961.2	2666.1	2570.1	2302	1.13294	0.080524	0.180067	Nonsignificant	None	4	Molecular Function:catalase activity (GO:0004096),Biological Process:response to oxidative stress (GO:0006979),Molecular Function:heme binding (GO:0020037),Biological Process:oxidation-reduction process (GO:0055114)	catalase	1.11.1.6	ko00380 Tryptophan metabolism ko00630 Glyoxylate and dicarboxylate metabolism ko01110 Biosynthesis of secondary metabolites ko01200 Carbon metabolism ko04016 MAPK signaling pathway - plant ko04146 Peroxisome	Catalase	P	Inorganic ion transport and metabolism ;
TRINITY_DN186247_c1_g1	MAOX_VITVI, RecName: Full=NADP-dependent malic enzyme Short=NADP-ME EC=1.1.1.40	-	2024	1837.7	2032.7	1883.3	1891.7	1855.2	1.04693	0.299211	0.0661588	Nonsignificant	None	5	Molecular Function:malic enzyme activity (GO:0004470),Molecular Function:malate dehydrogenase (decarboxylating) (NAD+) activity (GO:0004471),Biological Process:malate metabolic process (GO:0006108),Molecular Function:NAD binding (GO:0051287),Biological Process:oxidation-reduction process (GO:0055114)	malate dehydrogenase (oxaloacetate-decarboxylating)(NADP+)	1.1.1.40	ko00620 Pyruvate metabolism ko00710 Carbon fixation in photosynthetic organisms ko01100 Metabolic pathways ko01200 Carbon metabolism	Malic enzyme	C	Energy production and conversion ;
TRINITY_DN201672_c1_g2	BAS1_ORYSJ, RecName: Full=2-Cys peroxiredoxin BAS1, chloroplastic EC=1.11.1.15 AltName: Full=Thiol-specific antioxidant protein Flags: Precursor	-	370.1	426.6	413.9	424.8	461.7	433	0.917469	0.16192	-0.124269	Nonsignificant	None	4	Molecular Function:antioxidant activity (GO:0016209),Molecular Function:oxidoreductase activity (GO:0016491),Biological Process:cell redox homeostasis (GO:0045454),Biological Process:oxidation-reduction process (GO:0055114)	peroxiredoxin (alkyl hydroperoxide reductase subunit C)	1.11.1.15		Alkyl hydroperoxide reductase subunit AhpC (peroxiredoxin)	V	Defense mechanisms ;
TRINITY_DN198639_c0_g1	HSP7R_ARATH, RecName: Full=Heat shock 70 kDa protein 17 AltName: Full=Heat shock protein 70-17 Short=AtHsp70-17 Flags: Precursor	-	1437.8	1321.3	1338	1393.1	1354.6	1292.1	1.01418	0.704866	0.0203192	Nonsignificant	None	--	--	hypoxia up-regulated 1	--	ko04141 Protein processing in endoplasmic reticulum	Molecular chaperone DnaK (HSP70)	O	Posttranslational modification, protein turnover, chaperones ;
TRINITY_DN186425_c3_g2	14333_ORYSJ, RecName: Full=14-3-3-like protein GF14-C AltName: Full=G-box factor 14-3-3 homolog C	-	2504.1	2422.6	2444.2	2423.9	2548.9	2444.2	0.993785	0.756868	-0.00899498	Nonsignificant	None	1	Molecular Function:protein domain specific binding (GO:0019904)	14-3-3 protein epsilon	--		--	--	--
TRINITY_DN199143_c1_g2	MFP_ORYSJ, RecName: Full=Peroxisomal fatty acid beta-oxidation multifunctional protein Short=MFP Includes: RecName: Full=Enoyl-CoA hydratase/3-2-trans-enoyl-CoA isomerase/3-hydroxybutyryl-CoA epimerase EC=4.2.1.17 EC=5.1.2.3 EC=5.3.3.8 Includes: RecName: Full=3-hydroxyacyl-CoA dehydrogenase EC=1.1.1.35	-	1570	1434.1	1551.1	1480.8	1418.8	1341.9	1.07396	0.148528	0.10294	Nonsignificant	None	8	Molecular Function:catalytic activity (GO:0003824),Molecular Function:3-hydroxyacyl-CoA dehydrogenase activity (GO:0003857),Cellular Component:peroxisome (GO:0005777),Biological Process:fatty acid metabolic process (GO:0006631),Biological Process:fatty acid beta-oxidation (GO:0006635),Biological Process:metabolic process (GO:0008152),Molecular Function:oxidoreductase activity (GO:0016491),Biologi…	--	--	ko00071 Fatty acid degradation ko00592 alpha-Linolenic acid metabolism ko01100 Metabolic pathways ko01110 Biosynthesis of secondary metabolites ko01212 Fatty acid metabolism	3-hydroxyacyl-CoA dehydrogenase	I	Lipid transport and metabolism ;
TRINITY_DN192923_c0_g1	SUCA_ORYSJ, RecName: Full=Succinate--CoA ligase [ADP-forming] subunit alpha, mitochondrial {ECO:0000255|HAMAP-Rule:MF_03222} EC=6.2.1.5 {ECO:0000255|HAMAP-Rule:MF_03222} AltName: Full=Succinyl-CoA synthetase subunit alpha {ECO:0000255|HAMAP-Rule:MF_03222} Short=SCS-alpha {ECO:0000255|HAMAP-Rule:MF_03222} Flags: Precursor	-	1796.2	1871.4	1946.8	1864.4	1716.3	1859.9	1.03195	0.425248	0.0453661	Nonsignificant	None	3	Molecular Function:catalytic activity (GO:0003824),Biological Process:metabolic process (GO:0008152),Molecular Function:cofactor binding (GO:0048037)	--	--	ko00020 Citrate cycle (TCA cycle) ko00640 Propanoate metabolism ko01100 Metabolic pathways ko01110 Biosynthesis of secondary metabolites ko01200 Carbon metabolism	Succinyl-CoA synthetase, alpha subunit	C	Energy production and conversion ;
TRINITY_DN189523_c1_g3	TRPA_MAIZE, RecName: Full=Indole-3-glycerol phosphate lyase, chloroplastic EC=4.1.2.8 AltName: Full=Benzoxazineless 1 AltName: Full=Indole synthase AltName: Full=Tryptophan synthase alpha chain EC=4.2.1.20 Flags: Precursor	-	723.7	735.9	774.5	714.1	836.4	779.9	0.958677	0.471289	-0.0608838	Nonsignificant	None	2	Molecular Function:tryptophan synthase activity (GO:0004834),Biological Process:tryptophan metabolic process (GO:0006568)	indole-3-glycerol-phosphate lyase	4.1.2.8	ko00402 Benzoxazinoid biosynthesis ko01100 Metabolic pathways	Tryptophan synthase alpha chain	E	Amino acid transport and metabolism ;
TRINITY_DN182088_c0_g3	--	-	1203.6	1340.8	1265.4	1231.1	1148.4	1488.5	0.984953	0.872683	-0.0218725	Nonsignificant	None	--	--	--	--	--	--	--	--
TRINITY_DN190399_c1_g4	KPYC_SOYBN, RecName: Full=Pyruvate kinase, cytosolic isozyme Short=PK EC=2.7.1.40	-	1823.7	1864.2	1790.9	1786.9	1784.8	1890.8	1.00298	0.902046	0.00429856	Nonsignificant	None	4	Molecular Function:magnesium ion binding (GO:0000287),Molecular Function:pyruvate kinase activity (GO:0004743),Biological Process:glycolytic process (GO:0006096),Molecular Function:potassium ion binding (GO:0030955)	pyruvate kinase	2.7.1.40	ko00010 Glycolysis / Gluconeogenesis ko00230 Purine metabolism ko00620 Pyruvate metabolism ko01100 Metabolic pathways ko01110 Biosynthesis of secondary metabolites ko01200 Carbon metabolism ko01230 Biosynthesis of amino acids	Phosphohistidine swiveling domain of PEP-utilizing enzymes	T	Signal transduction mechanisms ;
TRINITY_DN200048_c1_g1	APM1B_ORYSJ, RecName: Full=Aminopeptidase M1-B EC=3.4.11.2 AltName: Full=Alpha-aminoacylpeptide hydrolase	-	1448.6	1447	1416.1	1421.7	1440.3	1389.7	1.01411	0.338762	0.020217	Nonsignificant	None	3	Biological Process:proteolysis (GO:0006508),Molecular Function:metallopeptidase activity (GO:0008237),Molecular Function:zinc ion binding (GO:0008270)	puromycin-sensitive aminopeptidase	3.4.11.-	--	Aminopeptidase N	E	Amino acid transport and metabolism ;
TRINITY_DN200619_c0_g1	PNP1_ORYSJ, RecName: Full=Probable polyribonucleotide nucleotidyltransferase 1, chloroplastic EC=2.7.7.8 AltName: Full=Polynucleotide phosphorylase 1 Short=PNPase 1 Flags: Precursor	-	1370.3	1390.4	1434.1	1307.9	1368.6	1394.1	1.03051	0.267939	0.0433606	Nonsignificant	None	4	Molecular Function:nucleic acid binding (GO:0003676),Molecular Function:RNA binding (GO:0003723),Molecular Function:polyribonucleotide nucleotidyltransferase activity (GO:0004654),Biological Process:mRNA catabolic process (GO:0006402)	polyribonucleotide nucleotidyltransferase	2.7.7.8	ko00230 Purine metabolism ko00240 Pyrimidine metabolism ko03018 RNA degradation	Polyribonucleotide nucleotidyltransferase (polynucleotide phosphorylase)	J	Translation, ribosomal structure and biogenesis ;
TRINITY_DN198891_c1_g1	CALX_SOYBN, RecName: Full=Calnexin homolog Flags: Precursor	-	2240.5	2020.3	2213.1	2133.4	1979.1	1948.1	1.06819	0.202687	0.0951745	Nonsignificant	None	4	Molecular Function:calcium ion binding (GO:0005509),Cellular Component:endoplasmic reticulum (GO:0005783),Biological Process:protein folding (GO:0006457),Molecular Function:unfolded protein binding (GO:0051082)	calnexin	--	ko04141 Protein processing in endoplasmic reticulum ko04145 Phagosome	--	--	--
TRINITY_DN171506_c2_g3	HSP81_ORYSJ, RecName: Full=Heat shock protein 81-1 Short=HSP81-1 AltName: Full=Heat shock protein 82	-	294	271.7	285.6	290.3	279	271.3	1.01273	0.697791	0.0182482	Nonsignificant	None	4	Molecular Function:ATP binding (GO:0005524),Biological Process:protein folding (GO:0006457),Biological Process:response to stress (GO:0006950),Molecular Function:unfolded protein binding (GO:0051082)	molecular chaperone HtpG	--	ko04141 Protein processing in endoplasmic reticulum ko04626 Plant-pathogen interaction	Molecular chaperone, HSP90 family	O	Posttranslational modification, protein turnover, chaperones ;
TRINITY_DN201310_c1_g1	G6PI_MAIZE, RecName: Full=Glucose-6-phosphate isomerase, cytosolic Short=GPI EC=5.3.1.9 AltName: Full=Phosphoglucose isomerase Short=PGI AltName: Full=Phosphohexose isomerase Short=PHI	-	1303.8	1285.3	1326	1389.8	1312.7	1386	0.957588	0.133436	-0.0625225	Nonsignificant	None	3	Molecular Function:glucose-6-phosphate isomerase activity (GO:0004347),Biological Process:gluconeogenesis (GO:0006094),Biological Process:glycolytic process (GO:0006096)	glucose-6-phosphate isomerase	5.3.1.9	ko00010 Glycolysis / Gluconeogenesis ko00030 Pentose phosphate pathway ko00500 Starch and sucrose metabolism ko00520 Amino sugar and nucleotide sugar metabolism ko01100 Metabolic pathways ko01110 Biosynthesis of secondary metabolites ko01200 Carbon metabolism	Glucose-6-phosphate isomerase	G	Carbohydrate transport and metabolism ;
TRINITY_DN200910_c2_g2	SPP_ORYSI, RecName: Full=Stromal processing peptidase, chloroplastic {ECO:0000305} EC=3.4.24.- {ECO:0000250|UniProtKB:Q40983} Flags: Precursor	-	1594.6	1557.6	1535.6	1606.8	1683.7	1632	0.952321	0.0553781	-0.0704802	Nonsignificant	None	--	--	--	--	--	Predicted Zn-dependent peptidase	R	General function prediction only ;
TRINITY_DN192442_c0_g2	PRS6A_ORYSJ, RecName: Full=26S proteasome regulatory subunit 6A homolog AltName: Full=Tat-binding protein homolog 1 Short=TBP-1	-	112.4	111.7	108	101.9	106.7	98.1	1.08282	0.0559861	0.11479	Nonsignificant	None	1	Molecular Function:ATP binding (GO:0005524)	26S proteasome regulatory subunit T5	--	ko03050 Proteasome	ATP-dependent 26S proteasome regulatory subunit	O	Posttranslational modification, protein turnover, chaperones ;
TRINITY_DN195831_c1_g1	AGLU_ORYSJ, RecName: Full=Probable alpha-glucosidase Os06g0675700 EC=3.2.1.20 AltName: Full=Maltase Flags: Precursor	-	1234.8	920.2	1155	1090	1142.9	956.8	1.03772	0.736793	0.0534105	Nonsignificant	None	1	Biological Process:carbohydrate metabolic process (GO:0005975)	alpha-glucosidase	3.2.1.20	ko00052 Galactose metabolism ko00500 Starch and sucrose metabolism ko01100 Metabolic pathways	Alpha-glucosidase, glycosyl hydrolase family GH31	G	Carbohydrate transport and metabolism ;
TRINITY_DN188322_c1_g2	RL4A_ARATH, RecName: Full=60S ribosomal protein L4-1 Short=L1	-	1770.7	1539.2	1639.9	1717.8	1701.4	1558.1	0.994475	0.918769	-0.00799311	Nonsignificant	None	3	Molecular Function:structural constituent of ribosome (GO:0003735),Cellular Component:ribosome (GO:0005840),Biological Process:translation (GO:0006412)	large subunit ribosomal protein L4e	--	ko03010 Ribosome	Ribosomal protein L4	J	Translation, ribosomal structure and biogenesis ;
TRINITY_DN195520_c1_g3	PNSL5_ARATH, RecName: Full=Photosynthetic NDH subunit of lumenal location 5, chloroplastic {ECO:0000303|PubMed:21785130} AltName: Full=Cyclophilin of 20 kDa 2 AltName: Full=Peptidyl-prolyl cis-trans isomerase CYP20-2 Short=PPIase CYP20-2 EC=5.2.1.8 AltName: Full=Rotamase CYP20-2 AltName: Full=Thylakoid lumen PPIase of 20 kDa Short=TLP20 Flags: Precursor	-	172.4	185.4	181.7	203	197.7	192.5	0.909474	0.0241004	-0.136896	Nonsignificant	None	3	Biological Process:protein peptidyl-prolyl isomerization (GO:0000413),Molecular Function:peptidyl-prolyl cis-trans isomerase activity (GO:0003755),Biological Process:protein folding (GO:0006457)	peptidyl-prolyl cis-trans isomerase B (cyclophilin B)	5.2.1.8	--	Peptidyl-prolyl cis-trans isomerase (rotamase) - cyclophilin family	O	Posttranslational modification, protein turnover, chaperones ;
TRINITY_DN190961_c0_g1	VATH_ORYSJ, RecName: Full=Probable V-type proton ATPase subunit H Short=V-ATPase subunit H AltName: Full=Vacuolar proton pump subunit H	-	1847.8	1751.1	1847.1	2022.3	1848.3	1816.9	0.957538	0.343389	-0.0625977	Nonsignificant	None	1	Biological Process:ATP hydrolysis coupled proton transport (GO:0015991)	V-type H+-transporting ATPase subunit H	--	ko00190 Oxidative phosphorylation ko01100 Metabolic pathways ko04145 Phagosome	--	--	--
TRINITY_DN198425_c0_g1	CRWN1_ARATH, RecName: Full=Protein CROWDED NUCLEI 1 {ECO:0000303|PubMed:24308514} AltName: Full=Protein KAKU2 {ECO:0000303|PubMed:24824484} AltName: Full=Protein LITTLE NUCLEI 1 {ECO:0000303|PubMed:17873096}	-	1857.3	1868.3	1891.4	1833.8	2051.8	1667.3	1.01154	0.865803	0.0165584	Nonsignificant	None	--	--	--	--	--	--	--	--
TRINITY_DN200413_c1_g2	COPA3_ORYSJ, RecName: Full=Coatomer subunit alpha-3 AltName: Full=Alpha-coat protein 3 Short=Alpha-COP 3	-	1792.5	1670.4	1693.3	1630.1	1592	1622.4	1.06434	0.0983064	0.0899605	Nonsignificant	None	6	Molecular Function:structural molecule activity (GO:0005198),Molecular Function:protein binding (GO:0005515),Biological Process:intracellular protein transport (GO:0006886),Biological Process:vesicle-mediated transport (GO:0016192),Cellular Component:membrane coat (GO:0030117),Cellular Component:COPI vesicle coat (GO:0030126)	coatomer subunit alpha	--	--	--	--	--
TRINITY_DN170213_c0_g1	CATA_SOLAP, RecName: Full=Catalase EC=1.11.1.6	-	8.8	11.4	30.1	36.6	33.9	6.6	0.652399	0.492223	-0.616172	Nonsignificant	None	4	Molecular Function:catalase activity (GO:0004096),Biological Process:response to oxidative stress (GO:0006979),Molecular Function:heme binding (GO:0020037),Biological Process:oxidation-reduction process (GO:0055114)	catalase	1.11.1.6	ko00380 Tryptophan metabolism ko00630 Glyoxylate and dicarboxylate metabolism ko01110 Biosynthesis of secondary metabolites ko01200 Carbon metabolism ko04016 MAPK signaling pathway - plant ko04146 Peroxisome	Catalase	P	Inorganic ion transport and metabolism ;
TRINITY_DN193278_c0_g4	HSP7M_PHAVU, RecName: Full=Heat shock 70 kDa protein, mitochondrial Flags: Precursor	-	191.7	197.2	193.9	206.5	165.8	191.3	1.03407	0.644994	0.0483293	Nonsignificant	None	--	--	molecular chaperone DnaK	--	ko03018 RNA degradation	Molecular chaperone DnaK (HSP70)	O	Posttranslational modification, protein turnover, chaperones ;
TRINITY_DN195049_c0_g1	SYNC1_ARATH, RecName: Full=Asparagine--tRNA ligase, cytoplasmic 1 {ECO:0000305} EC=6.1.1.22 {ECO:0000305} AltName: Full=Asparaginyl-tRNA synthetase 1 {ECO:0000305} Short=AsnRS 1 {ECO:0000305} AltName: Full=Protein EMBRYO DEFECTIVE 2755 {ECO:0000303|PubMed:16297076}	-	1490.2	1461.4	1467.9	1459.4	1551.7	1497.3	0.980281	0.386404	-0.0287324	Nonsignificant	None	4	Molecular Function:nucleotide binding (GO:0000166),Molecular Function:aminoacyl-tRNA ligase activity (GO:0004812),Molecular Function:ATP binding (GO:0005524),Biological Process:tRNA aminoacylation for protein translation (GO:0006418)	asparaginyl-tRNA synthetase	6.1.1.22	ko00970 Aminoacyl-tRNA biosynthesis	Aspartyl/asparaginyl-tRNA synthetase	J	Translation, ribosomal structure and biogenesis ;
TRINITY_DN150064_c0_g1	PRS6A_ORYSJ, RecName: Full=26S proteasome regulatory subunit 6A homolog AltName: Full=Tat-binding protein homolog 1 Short=TBP-1	-	69.9	61.7	55	57.6	65.7	59.7	1.01967	0.823199	0.0281053	Nonsignificant	None	1	Molecular Function:ATP binding (GO:0005524)	26S proteasome regulatory subunit T5	--	ko03050 Proteasome	ATP-dependent 26S proteasome regulatory subunit	O	Posttranslational modification, protein turnover, chaperones ;
TRINITY_DN196601_c0_g1	CISY4_ARATH, RecName: Full=Citrate synthase 4, mitochondrial EC=2.3.3.16 Flags: Precursor	-	1569.3	1539.9	1595.9	1459.4	1482.6	1360	1.0937	0.0534446	0.129218	Nonsignificant	None	--	--	citrate synthase	2.3.3.1	ko00020 Citrate cycle (TCA cycle) ko00630 Glyoxylate and dicarboxylate metabolism ko01100 Metabolic pathways ko01110 Biosynthesis of secondary metabolites ko01200 Carbon metabolism ko01210 2-Oxocarboxylic acid metabolism ko01230 Biosynthesis of amino acids	Citrate synthase	C	Energy production and conversion ;
TRINITY_DN194528_c0_g2	MDHC_MAIZE, RecName: Full=Malate dehydrogenase, cytoplasmic {ECO:0000303|Ref.1} EC=1.1.1.37 {ECO:0000269|PubMed:23313174}	-	155.8	137.9	151.2	146.3	150.5	127.3	1.04905	0.483966	0.0690766	Nonsignificant	None	4	Biological Process:malate metabolic process (GO:0006108),Molecular Function:oxidoreductase activity (GO:0016491),Molecular Function:malate dehydrogenase activity (GO:0016615),Biological Process:oxidation-reduction process (GO:0055114)	malate dehydrogenase	1.1.1.37	ko00020 Citrate cycle (TCA cycle) ko00270 Cysteine and methionine metabolism ko00620 Pyruvate metabolism ko00630 Glyoxylate and dicarboxylate metabolism ko00710 Carbon fixation in photosynthetic organisms ko01100 Metabolic pathways ko01110 Biosynthesis of secondary metabolites ko01200 Carbon metabolism	Malate/lactate dehydrogenase	C	Energy production and conversion ;
TRINITY_DN184326_c0_g1	PRXQ_WHEAT, RecName: Full=Peroxiredoxin Q, chloroplastic EC=1.11.1.15 AltName: Full=Thioredoxin peroxidase Flags: Precursor	-	685.5	773.6	802.2	973.6	744.8	963.6	0.843139	0.192731	-0.246157	Nonsignificant	None	4	Molecular Function:antioxidant activity (GO:0016209),Molecular Function:oxidoreductase activity (GO:0016491),Biological Process:cell redox homeostasis (GO:0045454),Biological Process:oxidation-reduction process (GO:0055114)	peroxiredoxin Q/BCP	1.11.1.15	--	Peroxiredoxin	O	Posttranslational modification, protein turnover, chaperones ;
TRINITY_DN196347_c1_g2	GSHRP_TOBAC, RecName: Full=Glutathione reductase, chloroplastic Short=GR Short=GRase EC=1.8.1.7 Flags: Precursor Fragment	-	1655	1553.3	1528.7	1537.8	1594	1677.2	0.985028	0.690261	-0.0217633	Nonsignificant	None	2	Molecular Function:oxidoreductase activity (GO:0016491),Biological Process:oxidation-reduction process (GO:0055114)	glutathione reductase (NADPH)	1.8.1.7	ko00480 Glutathione metabolism	Pyruvate/2-oxoglutarate dehydrogenase complex, dihydrolipoamide dehydrogenase (E3) component or related enzyme	C	Energy production and conversion ;
TRINITY_DN200906_c1_g1	TSS_ARATH, RecName: Full=Protein TSS {ECO:0000303|PubMed:21185286} AltName: Full=TPR-domain suppressor of STIMPY {ECO:0000303|PubMed:21185286}	-	48.3	44.9	49.5	48.6	46.5	43.8	1.02736	0.552642	0.0389387	Nonsignificant	None	1	Molecular Function:protein binding (GO:0005515)	protein TIF31	--	--	Putative Zn-dependent protease, contains TPR repeats	R	General function prediction only ;
TRINITY_DN195618_c0_g1	RR5_SPIOL, RecName: Full=30S ribosomal protein S5, chloroplastic {ECO:0000303|PubMed:10874039} AltName: Full=Chloroplastic small ribosomal subunit protein uS5c {ECO:0000303|PubMed:28007896} Flags: Precursor	-	1872	1779.3	1822.6	2001.4	2111.3	2150.1	0.874034	0.0119694	-0.194239	Nonsignificant	None	4	Molecular Function:RNA binding (GO:0003723),Molecular Function:structural constituent of ribosome (GO:0003735),Cellular Component:ribosome (GO:0005840),Biological Process:translation (GO:0006412)	--	--	--	Ribosomal protein S5	J	Translation, ribosomal structure and biogenesis ;
TRINITY_DN195143_c2_g1	ALFP3_ARATH, RecName: Full=Fructose-bisphosphate aldolase 3, chloroplastic {ECO:0000305} Short=AtFBA3 {ECO:0000303|PubMed:22561114} EC=4.1.2.13 {ECO:0000305} AltName: Full=Protein PIGMENT DEFECTIVE 345 Flags: Precursor	-	1324.1	1261.4	1304.2	1242	1267.3	1204.3	1.04742	0.0871014	0.0668405	Nonsignificant	None	2	Molecular Function:fructose-bisphosphate aldolase activity (GO:0004332),Biological Process:glycolytic process (GO:0006096)	fructose-bisphosphate aldolase, class I	4.1.2.13	ko00010 Glycolysis / Gluconeogenesis ko00030 Pentose phosphate pathway ko00051 Fructose and mannose metabolism ko00710 Carbon fixation in photosynthetic organisms ko01100 Metabolic pathways ko01110 Biosynthesis of secondary metabolites ko01200 Carbon metabolism ko01230 Biosynthesis of amino acids	Fructose-bisphosphate aldolase class 1	G	Carbohydrate transport and metabolism ;
TRINITY_DN201738_c0_g1	RK15_PEA, RecName: Full=50S ribosomal protein L15, chloroplastic AltName: Full=CL15 Flags: Precursor Fragment	-	1257.4	1244.1	1255.7	1348.7	1288.2	1460.5	0.916972	0.152782	-0.125051	Nonsignificant	None	3	Molecular Function:structural constituent of ribosome (GO:0003735),Biological Process:translation (GO:0006412),Cellular Component:large ribosomal subunit (GO:0015934)	large subunit ribosomal protein L15	--	ko03010 Ribosome	Ribosomal protein L15	J	Translation, ribosomal structure and biogenesis ;
TRINITY_DN188105_c0_g2	NAP1B_ORYSJ, RecName: Full=Nucleosome assembly protein 12 Short=OsNAP12 AltName: Full=Nucleosome assembly protein 1-like 2 Short=OsNAP1_L2 Flags: Precursor	-	1256.5	1262.8	1307.3	1299.5	1527.3	1264.7	0.935256	0.396258	-0.0965668	Nonsignificant	None	2	Cellular Component:nucleus (GO:0005634),Biological Process:nucleosome assembly (GO:0006334)	nucleosome assembly protein 1-like 1	--	--	--	--	--
TRINITY_DN188543_c0_g2	RS3A_ORYSJ, RecName: Full=40S ribosomal protein S3a {ECO:0000255|HAMAP-Rule:MF_03122} AltName: Full=CYC07 protein	-	1331	1236.2	1254.9	1304.2	1347.7	1182.5	0.996792	0.947171	-0.00463532	Nonsignificant	None	3	Molecular Function:structural constituent of ribosome (GO:0003735),Cellular Component:ribosome (GO:0005840),Biological Process:translation (GO:0006412)	small subunit ribosomal protein S3Ae	--	ko03010 Ribosome	Ribosomal protein S3AE	J	Translation, ribosomal structure and biogenesis ;
TRINITY_DN195374_c1_g1	MDHC_MAIZE, RecName: Full=Malate dehydrogenase, cytoplasmic {ECO:0000303|Ref.1} EC=1.1.1.37 {ECO:0000269|PubMed:23313174}	-	2047.4	2106.9	2043.6	2030.2	1898.9	1986.4	1.04774	0.118921	0.0672794	Nonsignificant	None	4	Biological Process:malate metabolic process (GO:0006108),Molecular Function:oxidoreductase activity (GO:0016491),Molecular Function:malate dehydrogenase activity (GO:0016615),Biological Process:oxidation-reduction process (GO:0055114)	malate dehydrogenase	1.1.1.37	ko00020 Citrate cycle (TCA cycle) ko00270 Cysteine and methionine metabolism ko00620 Pyruvate metabolism ko00630 Glyoxylate and dicarboxylate metabolism ko00710 Carbon fixation in photosynthetic organisms ko01100 Metabolic pathways ko01110 Biosynthesis of secondary metabolites ko01200 Carbon metabolism	Malate/lactate dehydrogenase	C	Energy production and conversion ;
TRINITY_DN182948_c0_g2	GATP1_ORYSI, RecName: Full=Gamma-aminobutyrate transaminase 1, mitochondrial EC=2.6.1.96 Flags: Precursor	-	827.9	799.9	747.8	798.6	887.1	751	0.974925	0.68756	-0.0366367	Nonsignificant	None	2	Molecular Function:transaminase activity (GO:0008483),Molecular Function:pyridoxal phosphate binding (GO:0030170)	4-aminobutyrate---pyruvate transaminase	2.6.1.96	ko00250 Alanine, aspartate and glutamate metabolism ko00650 Butanoate metabolism ko01100 Metabolic pathways	Adenosylmethionine-8-amino-7-oxononanoate aminotransferase	H	Coenzyme transport and metabolism ;
TRINITY_DN187715_c0_g1	GRS11_ORYSJ, RecName: Full=Monothiol glutaredoxin-S11	-	248.1	266.5	258.3	245.9	236.5	251.6	1.053	0.136197	0.0745017	Nonsignificant	None	3	Molecular Function:electron carrier activity (GO:0009055),Molecular Function:protein disulfide oxidoreductase activity (GO:0015035),Biological Process:cell redox homeostasis (GO:0045454)	--	--	--	Glutaredoxin-related protein	O	Posttranslational modification, protein turnover, chaperones ;
TRINITY_DN173541_c6_g4	H4_SOYBN, RecName: Full=Histone H4	-	48.3	43.1	61.3	101.9	75.1	64.4	0.63256	0.10039	-0.660726	Nonsignificant	None	3	Cellular Component:nucleosome (GO:0000786),Molecular Function:DNA binding (GO:0003677),Cellular Component:nucleus (GO:0005634)	histone H4	--		--	--	--
TRINITY_DN193066_c1_g1	SIR_MAIZE, RecName: Full=Sulfite reductase [ferredoxin], chloroplastic Short=ZmSiR EC=1.8.7.1 {ECO:0000269|PubMed:10506201, ECO:0000269|PubMed:10712553} Flags: Precursor	-	1429.8	1368.3	1431.1	1353.4	1338.1	1514.2	1.00559	0.905811	0.00803884	Nonsignificant	None	4	Molecular Function:oxidoreductase activity (GO:0016491),Molecular Function:heme binding (GO:0020037),Molecular Function:iron-sulfur cluster binding (GO:0051536),Biological Process:oxidation-reduction process (GO:0055114)	sulfite reductase (ferredoxin)	1.8.7.1	ko00920 Sulfur metabolism ko01100 Metabolic pathways	Sulfite reductase, beta subunit (hemoprotein)	P	Inorganic ion transport and metabolism ;
TRINITY_DN191076_c2_g1	DJA8_ORYSJ, RecName: Full=Chaperone protein dnaJ A8, chloroplastic {ECO:0000305} Short=OsDjA8 {ECO:0000303|PubMed:23160806} Flags: Precursor	-	1811.8	1868.8	1833.3	2031.6	1822.4	1836.6	0.968949	0.477578	-0.0455077	Nonsignificant	None	2	Molecular Function:heat shock protein binding (GO:0031072),Molecular Function:unfolded protein binding (GO:0051082)	molecular chaperone DnaJ	--	--	DnaJ-class molecular chaperone with C-terminal Zn finger domain	O	Posttranslational modification, protein turnover, chaperones ;
TRINITY_DN201523_c1_g1	GGT1_ARATH, RecName: Full=Glutamate--glyoxylate aminotransferase 1 Short=AtGGT2 EC=2.6.1.4 {ECO:0000269|PubMed:12529529} AltName: Full=Alanine aminotransferase GGT1 EC=2.6.1.2 {ECO:0000269|PubMed:12529529} AltName: Full=Alanine--glyoxylate aminotransferase GGT1 EC=2.6.1.44 {ECO:0000269|PubMed:12529529} AltName: Full=Alanine-2-oxoglutarate aminotransferase 1 EC=2.6.1.-	-	722.9	737	715	751.9	798.3	829.9	0.913785	0.0847494	-0.130073	Nonsignificant	None	2	Biological Process:biosynthetic process (GO:0009058),Molecular Function:pyridoxal phosphate binding (GO:0030170)	--	--	ko00220 Arginine biosynthesis ko00250 Alanine, aspartate and glutamate metabolism ko00260 Glycine, serine and threonine metabolism ko00630 Glyoxylate and dicarboxylate metabolism ko00710 Carbon fixation in photosynthetic organisms ko01100 Metabolic pathways ko01110 Biosynthesis of secondary metabolites ko01200 Carbon metabolism ko01210 2-Oxocarboxylic acid metabolism ko01230 Biosynthesis of amino…	Aspartate/methionine/tyrosine aminotransferase	E	Amino acid transport and metabolism ;
TRINITY_DN200246_c0_g1	CHLI_ORYSI, RecName: Full=Magnesium-chelatase subunit ChlI, chloroplastic Short=Mg-chelatase subunit I EC=6.6.1.1 AltName: Full=Mg-protoporphyrin IX chelatase subunit ChlI AltName: Full=Protein CHLORINA 9 Flags: Precursor	-	26.3	23.6	24.7	24.8	35.7	23.4	0.889154	0.51088	-0.169495	Nonsignificant	None	--	--	magnesium chelatase subunit I	6.6.1.1	ko00860 Porphyrin and chlorophyll metabolism ko01100 Metabolic pathways ko01110 Biosynthesis of secondary metabolites	Mg-chelatase subunit ChlI	H	Coenzyme transport and metabolism ;
TRINITY_DN184321_c1_g1	HS906_ARATH, RecName: Full=Heat shock protein 90-6, mitochondrial {ECO:0000305} Short=AtHSP90.6 {ECO:0000305} Short=AtHsp90-6 {ECO:0000303|PubMed:11599565} AltName: Full=Heat shock protein 89-1 {ECO:0000305} Short=Hsp89-1 {ECO:0000303|PubMed:11599565} Flags: Precursor	-	1163.4	1099	1085	1109.9	1125.6	1090.6	1.0064	0.805723	0.00920941	Nonsignificant	None	4	Molecular Function:ATP binding (GO:0005524),Biological Process:protein folding (GO:0006457),Biological Process:response to stress (GO:0006950),Molecular Function:unfolded protein binding (GO:0051082)	heat shock protein 90kDa beta	--	ko04141 Protein processing in endoplasmic reticulum ko04626 Plant-pathogen interaction	Molecular chaperone, HSP90 family	O	Posttranslational modification, protein turnover, chaperones ;
TRINITY_DN181451_c0_g3	RAB2B_MAIZE, RecName: Full=Ras-related protein Rab-2-B	-	1455.7	1570.7	1483.9	1502.2	1479.3	1478.9	1.01119	0.681406	0.0160503	Nonsignificant	None	2	Molecular Function:GTP binding (GO:0005525),Biological Process:small GTPase mediated signal transduction (GO:0007264)	Ras-related protein Rab-2A	--		GTPase SAR1 family domain	R	General function prediction only ;
TRINITY_DN198800_c1_g1	E13B_HORVU, RecName: Full=Glucan endo-1,3-beta-glucosidase GII EC=3.2.1.39 {ECO:0000269|PubMed:8514770} AltName: Full=(1->3)-beta-glucan endohydrolase GII AltName: Full=(1->3)-beta-glucanase isoenzyme GII AltName: Full=Beta-1,3-endoglucanase GII Flags: Precursor	-	1129.8	974.4	1158.9	884.7	894.2	819.1	1.256	0.0452174	0.328842	Significant	up	1	Biological Process:carbohydrate metabolic process (GO:0005975)	--	--	--	--	--	--
TRINITY_DN178537_c2_g1	MDHM1_ARATH, RecName: Full=Malate dehydrogenase 1, mitochondrial {ECO:0000305} EC=1.1.1.37 {ECO:0000269|PubMed:26203119} AltName: Full=Mitochondrial MDH1 {ECO:0000303|PubMed:20876337} Short=mMDH1 {ECO:0000303|PubMed:20876337} AltName: Full=Mitochondrial NAD-dependent malate dehydrogenase 1 {ECO:0000305} Short=mNAD-MDH 1 {ECO:0000305} Short=mtNAD-MDH1 {ECO:0000303|PubMed:20876337} Flags: Precursor	-	460.2	491.9	442.7	450.4	433.9	458.3	1.03888	0.360257	0.0550287	Nonsignificant	None	2	Molecular Function:oxidoreductase activity (GO:0016491),Biological Process:oxidation-reduction process (GO:0055114)	malate dehydrogenase	1.1.1.37	ko00020 Citrate cycle (TCA cycle) ko00270 Cysteine and methionine metabolism ko00620 Pyruvate metabolism ko00630 Glyoxylate and dicarboxylate metabolism ko00710 Carbon fixation in photosynthetic organisms ko01100 Metabolic pathways ko01110 Biosynthesis of secondary metabolites ko01200 Carbon metabolism	Malate/lactate dehydrogenase	C	Energy production and conversion ;
TRINITY_DN190019_c1_g4	Y2446_ARATH, RecName: Full=Uncharacterized protein At2g34460, chloroplastic Flags: Precursor	-	1924.5	2054.9	2090.8	2620	1877.6	1835.6	0.958473	0.76575	-0.0611906	Nonsignificant	None	--	--	--	--	--	Uncharacterized conserved protein YbjT, contains NAD(P)-binding and DUF2867 domains	R	General function prediction only ;
TRINITY_DN199299_c3_g1	CRD1_HORVU, RecName: Full=Magnesium-protoporphyrin IX monomethyl ester [oxidative] cyclase, chloroplastic Short=Mg-protoporphyrin IX monomethyl ester oxidative cyclase EC=1.14.13.81 AltName: Full=Protein Xantha-l Flags: Precursor	-	1337.5	1350.5	1276.9	1385.1	1753.1	1334.7	0.886427	0.327066	-0.173926	Nonsignificant	None	6	Biological Process:photosynthesis (GO:0015979),Biological Process:chlorophyll biosynthetic process (GO:0015995),Molecular Function:oxidoreductase activity (GO:0016491),Molecular Function:metal ion binding (GO:0046872),Molecular Function:magnesium-protoporphyrin IX monomethyl ester (oxidative) cyclase activity (GO:0048529),Biological Process:oxidation-reduction process (GO:0055114)	magnesium-protoporphyrin IX monomethyl ester (oxidative) cyclase	1.14.13.81	ko00860 Porphyrin and chlorophyll metabolism ko01100 Metabolic pathways ko01110 Biosynthesis of secondary metabolites	Rubrerythrin	P	Inorganic ion transport and metabolism ;
TRINITY_DN199267_c0_g8	IDHP_MEDSA, RecName: Full=Isocitrate dehydrogenase [NADP], chloroplastic Short=IDH EC=1.1.1.42 AltName: Full=IDP AltName: Full=NADP(+)-specific ICDH AltName: Full=Oxalosuccinate decarboxylase Flags: Precursor Fragment	-	85.2	74.7	71.3	61.6	70.5	68.2	1.15427	0.118843	0.206979	Nonsignificant	None	3	Molecular Function:isocitrate dehydrogenase (NADP+) activity (GO:0004450),Biological Process:isocitrate metabolic process (GO:0006102),Biological Process:oxidation-reduction process (GO:0055114)	isocitrate dehydrogenase	1.1.1.42	ko00020 Citrate cycle (TCA cycle) ko00480 Glutathione metabolism ko01100 Metabolic pathways ko01110 Biosynthesis of secondary metabolites ko01200 Carbon metabolism ko01210 2-Oxocarboxylic acid metabolism ko01230 Biosynthesis of amino acids ko04146 Peroxisome	Isocitrate dehydrogenase	C	Energy production and conversion ;
TRINITY_DN199546_c3_g1	UAH_ORYSJ, RecName: Full=Probable ureidoglycolate hydrolase Short=OsUAH EC=3.5.1.116 Flags: Precursor	-	1403	1379.9	1390.5	1362.3	1535.2	1407	0.969544	0.488464	-0.0446225	Nonsignificant	None	2	Biological Process:metabolic process (GO:0008152),Molecular Function:hydrolase activity (GO:0016787)	ureidoglycolate amidohydrolase	3.5.1.116	ko00230 Purine metabolism ko01100 Metabolic pathways	Acetylornithine deacetylase/Succinyl-diaminopimelate desuccinylase or related deacylase	E	Amino acid transport and metabolism ;
TRINITY_DN196018_c2_g1	MFPA_BRANA, RecName: Full=Glyoxysomal fatty acid beta-oxidation multifunctional protein MFP-a Includes: RecName: Full=Enoyl-CoA hydratase/3-2-trans-enoyl-CoA isomerase/3-hydroxybutyryl-CoA epimerase EC=4.2.1.17 EC=5.1.2.3 EC=5.3.3.8 Includes: RecName: Full=3-hydroxyacyl-CoA dehydrogenase EC=1.1.1.35	-	184.5	178.1	180.2	185.4	192.3	203.4	0.934091	0.122995	-0.0983657	Nonsignificant	None	4	Molecular Function:3-hydroxyacyl-CoA dehydrogenase activity (GO:0003857),Biological Process:fatty acid metabolic process (GO:0006631),Molecular Function:oxidoreductase activity (GO:0016491),Biological Process:oxidation-reduction process (GO:0055114)	--	--	ko00071 Fatty acid degradation ko00592 alpha-Linolenic acid metabolism ko01100 Metabolic pathways ko01110 Biosynthesis of secondary metabolites ko01212 Fatty acid metabolism	3-hydroxyacyl-CoA dehydrogenase	I	Lipid transport and metabolism ;
TRINITY_DN197644_c0_g1	IMB1_ARATH, RecName: Full=Importin subunit beta-1 {ECO:0000305} AltName: Full=Karyopherin subunit beta-1 Short=ATKPNB1 {ECO:0000303|PubMed:23582042}	-	1260.7	1207.8	1205.1	1225.5	1248.3	1206.3	0.998234	0.926241	-0.00255042	Nonsignificant	None	4	Biological Process:intracellular protein transport (GO:0006886),Biological Process:nucleocytoplasmic transport (GO:0006913),Molecular Function:Ran GTPase binding (GO:0008536),Molecular Function:protein transporter activity (GO:0008565)	importin subunit beta-1	--	ko03013 RNA transport	--	--	--
TRINITY_DN191770_c4_g2	14335_ORYSJ, RecName: Full=14-3-3-like protein GF14-E AltName: Full=G-box factor 14-3-3 homolog E	-	1670.3	1577.3	1692.9	1666.2	1575.1	1608.8	1.01864	0.536009	0.0266426	Nonsignificant	None	1	Molecular Function:protein domain specific binding (GO:0019904)	14-3-3 protein epsilon	--		--	--	--
TRINITY_DN200501_c1_g2	GLGB_MAIZE, RecName: Full=1,4-alpha-glucan-branching enzyme 2, chloroplastic/amyloplastic EC=2.4.1.18 AltName: Full=Q-enzyme AltName: Full=Starch-branching enzyme IIB Flags: Precursor	-	1716.9	1881	1791.7	1865.3	1704.2	1750.2	1.01314	0.747055	0.0188333	Nonsignificant	None	3	Molecular Function:catalytic activity (GO:0003824),Biological Process:carbohydrate metabolic process (GO:0005975),Molecular Function:cation binding (GO:0043169)	1,4-alpha-glucan branching enzyme	2.4.1.18	ko00500 Starch and sucrose metabolism ko01100 Metabolic pathways ko01110 Biosynthesis of secondary metabolites	1,4-alpha-glucan branching enzyme	G	Carbohydrate transport and metabolism ;
TRINITY_DN189085_c0_g3	TRPA1_ARATH, RecName: Full=Tryptophan synthase alpha chain EC=4.2.1.20 AltName: Full=Indole synthase AltName: Full=Indole-3-glycerol-phosphate lyase EC=4.1.2.8	-	1515	1286.4	1455.2	1198.6	1258.3	1156.9	1.17787	0.0717951	0.236185	Nonsignificant	None	2	Molecular Function:tryptophan synthase activity (GO:0004834),Biological Process:tryptophan metabolic process (GO:0006568)	tryptophan synthase alpha chain	4.2.1.20	ko00260 Glycine, serine and threonine metabolism ko00400 Phenylalanine, tyrosine and tryptophan biosynthesis ko01100 Metabolic pathways ko01110 Biosynthesis of secondary metabolites ko01230 Biosynthesis of amino acids	Tryptophan synthase alpha chain	E	Amino acid transport and metabolism ;
TRINITY_DN201003_c1_g5	CLPC2_ORYSJ, RecName: Full=Chaperone protein ClpC2, chloroplastic AltName: Full=ATP-dependent Clp protease ATP-binding subunit ClpC homolog 2 AltName: Full=Casein lytic proteinase C2 Flags: Precursor	-	6.2	6.4	9.3	6	4.2	4.1	1.53147	0.111453	0.614916	Nonsignificant	None	2	Molecular Function:protein binding (GO:0005515),Molecular Function:ATP binding (GO:0005524)	ATP-dependent Clp protease ATP-binding subunit ClpC	--	ko01100 Metabolic pathways	ATP-dependent Clp protease ATP-binding subunit ClpA	O	Posttranslational modification, protein turnover, chaperones ;
TRINITY_DN182208_c0_g2	14333_ORYSJ, RecName: Full=14-3-3-like protein GF14-C AltName: Full=G-box factor 14-3-3 homolog C	-	29.4	25.8	31.6	29.2	24.7	34.5	0.9819	0.88104	-0.0263513	Nonsignificant	None	1	Molecular Function:protein domain specific binding (GO:0019904)	14-3-3 protein epsilon	--		--	--	--
TRINITY_DN199927_c1_g1	APX2_ORYSJ, RecName: Full=L-ascorbate peroxidase 2, cytosolic {ECO:0000305} EC=1.11.1.11 {ECO:0000269|PubMed:15685422} AltName: Full=APXb {ECO:0000303|PubMed:15685422} AltName: Full=OsAPx2 {ECO:0000303|PubMed:15599508}	-	1128.4	1219.4	1278.6	1222.1	1255.1	1213	0.982711	0.680283	-0.0251609	Nonsignificant	None	4	Molecular Function:peroxidase activity (GO:0004601),Biological Process:response to oxidative stress (GO:0006979),Molecular Function:heme binding (GO:0020037),Biological Process:oxidation-reduction process (GO:0055114)	L-ascorbate peroxidase	1.11.1.11	ko00053 Ascorbate and aldarate metabolism ko00480 Glutathione metabolism	Catalase (peroxidase I)	P	Inorganic ion transport and metabolism ;
TRINITY_DN178259_c2_g1	--	-	1759.7	1785.1	1883.8	1745.9	1751.4	1670	1.05057	0.140352	0.0711695	Nonsignificant	None	3	Molecular Function:beta-galactosidase activity (GO:0004565),Biological Process:carbohydrate metabolic process (GO:0005975),Cellular Component:beta-galactosidase complex (GO:0009341)	beta-galactosidase	3.2.1.23	ko00052 Galactose metabolism ko00511 Other glycan degradation ko00600 Sphingolipid metabolism ko01100 Metabolic pathways	Beta-galactosidase/beta-glucuronidase	G	Carbohydrate transport and metabolism ;
TRINITY_DN180546_c0_g1	RS141_MAIZE, RecName: Full=40S ribosomal protein S14 AltName: Full=Clone MCH1	-	1246.2	1158.8	1171.6	1189.2	1160.4	1203.1	1.00673	0.80891	0.00967291	Nonsignificant	None	3	Molecular Function:structural constituent of ribosome (GO:0003735),Cellular Component:ribosome (GO:0005840),Biological Process:translation (GO:0006412)	small subunit ribosomal protein S14e	--	ko03010 Ribosome	Ribosomal protein S11	J	Translation, ribosomal structure and biogenesis ;
TRINITY_DN177179_c5_g2	HS21C_WHEAT, RecName: Full=Small heat shock protein, chloroplastic AltName: Full=Heat shock protein 26.6 Flags: Precursor	-	2175	2015.8	1271.7	2130.1	1608.6	1110.5	1.12647	0.640455	0.171815	Nonsignificant	None	--	--	HSP20 family protein	--	ko04141 Protein processing in endoplasmic reticulum	Molecular chaperone IbpA, HSP20 family	O	Posttranslational modification, protein turnover, chaperones ;
TRINITY_DN195069_c1_g1	STR1_ARATH, RecName: Full=Thiosulfate/3-mercaptopyruvate sulfurtransferase 1, mitochondrial EC=2.8.1.1 {ECO:0000269|PubMed:10601861, ECO:0000269|PubMed:10951223, ECO:0000269|PubMed:12437129, ECO:0000269|PubMed:12482606} EC=2.8.1.2 {ECO:0000269|PubMed:10601861, ECO:0000269|PubMed:10951223, ECO:0000269|PubMed:12437129, ECO:0000269|PubMed:12482606} AltName: Full=AtMST1 AltName: Full=Rhodanese homolo…	-	1034.1	1092.9	1052.1	1089.3	1115.2	1096.7	0.963013	0.129894	-0.0543721	Nonsignificant	None	--	--	--	--	ko00270 Cysteine and methionine metabolism ko00920 Sulfur metabolism ko01100 Metabolic pathways ko04122 Sulfur relay system	3-mercaptopyruvate sulfurtransferase SseA, contains two rhodanese domains	P	Inorganic ion transport and metabolism ;
TRINITY_DN199517_c1_g1	TIG_ARATH, RecName: Full=Trigger factor-like protein TIG, Chloroplastic EC=5.2.1.8 AltName: Full=Immunophilin TIG AltName: Full=Peptidyl-prolyl cis-trans isomerase TIG Short=PPIase TIG AltName: Full=Rotamase Flags: Precursor	-	1176.7	1154.3	1124.5	1149.3	1159.6	1208.5	0.982402	0.434822	-0.0256149	Nonsignificant	None	2	Biological Process:protein folding (GO:0006457),Biological Process:protein transport (GO:0015031)	trigger factor	--	--	FKBP-type peptidyl-prolyl cis-trans isomerase (trigger factor)	O	Posttranslational modification, protein turnover, chaperones ;
TRINITY_DN191411_c4_g1	TBA1_HORVU, RecName: Full=Tubulin alpha-1 chain	-	1903.1	1567.9	1690.3	1713.1	1904.9	1992.5	0.919936	0.30893	-0.120395	Nonsignificant	None	5	Molecular Function:GTPase activity (GO:0003924),Molecular Function:structural constituent of cytoskeleton (GO:0005200),Molecular Function:GTP binding (GO:0005525),Cellular Component:microtubule (GO:0005874),Biological Process:microtubule-based process (GO:0007017)	tubulin alpha	--	ko04145 Phagosome	--	--	--
TRINITY_DN182281_c0_g2	PPD6_ARATH, RecName: Full=PsbP domain-containing protein 6, chloroplastic AltName: Full=OEC23-like protein 1 Flags: Precursor	-	243.7	242.4	245.2	235	245.4	261.7	0.985447	0.689333	-0.0211502	Nonsignificant	None	5	Molecular Function:calcium ion binding (GO:0005509),Cellular Component:photosystem II (GO:0009523),Cellular Component:photosystem II oxygen evolving complex (GO:0009654),Biological Process:photosynthesis (GO:0015979),Cellular Component:extrinsic component of membrane (GO:0019898)	--	--	--	--	--	--
TRINITY_DN197244_c3_g1	ARF1_ORYSJ, RecName: Full=ADP-ribosylation factor 1 AltName: Full=13 kDa cold-induced protein	-	1564.6	1475.1	1508.2	1517	1482.7	1515.6	1.00722	0.730243	0.0103787	Nonsignificant	None	3	Molecular Function:GTP binding (GO:0005525),Cellular Component:intracellular (GO:0005622),Biological Process:small GTPase mediated signal transduction (GO:0007264)	ADP-ribosylation factor 1	--	ko04144 Endocytosis	GTPase SAR1 family domain	R	General function prediction only ;
TRINITY_DN195552_c0_g1	--	-	889.5	860.8	868.9	898	896.3	845.3	0.992272	0.74829	-0.0111931	Nonsignificant	None	1	Cellular Component:ER membrane protein complex (GO:0072546)	--	--	--	--	--	--
TRINITY_DN200896_c1_g2	--	-	1637.1	1693.6	1797	1782.9	1719.3	1777.2	0.971266	0.401347	-0.0420621	Nonsignificant	None	--	--	--	--	--	--	--	--
TRINITY_DN191770_c3_g3	1433A_HORVU, RecName: Full=14-3-3-like protein A Short=14-3-3A	-	1053.5	1077.3	1056.2	1066.1	1217.4	967	0.980465	0.799154	-0.0284626	Nonsignificant	None	1	Molecular Function:protein domain specific binding (GO:0019904)	14-3-3 protein epsilon	--		--	--	--
TRINITY_DN196874_c1_g1	SYTM1_ARATH, RecName: Full=Threonine--tRNA ligase, mitochondrial 1 {ECO:0000305} EC=6.1.1.3 {ECO:0000305} AltName: Full=AtSYT1 {ECO:0000303|PubMed:10583378} AltName: Full=Threonyl-tRNA synthetase {ECO:0000305} Short=ThrRS {ECO:0000305} Flags: Precursor	-	1013.7	967.5	1021.7	997.7	1149.2	975.4	0.961759	0.54799	-0.0562527	Nonsignificant	None	8	Molecular Function:nucleotide binding (GO:0000166),Molecular Function:aminoacyl-tRNA ligase activity (GO:0004812),Molecular Function:threonine-tRNA ligase activity (GO:0004829),Molecular Function:ATP binding (GO:0005524),Cellular Component:cytoplasm (GO:0005737),Biological Process:tRNA aminoacylation for protein translation (GO:0006418),Biological Process:threonyl-tRNA aminoacylation (GO:0006435)…	threonyl-tRNA synthetase	6.1.1.3	ko00970 Aminoacyl-tRNA biosynthesis	Threonyl-tRNA synthetase	J	Translation, ribosomal structure and biogenesis ;
TRINITY_DN199047_c0_g4	--	-	1252	1420.1	1477	1312.5	1433.6	1380	1.00557	0.926092	0.00801964	Nonsignificant	None	1	Molecular Function:nutrient reservoir activity (GO:0045735)	--	--	--	--	--	--
TRINITY_DN197433_c1_g1	GSH1A_ORYSJ, RecName: Full=Glutamate--cysteine ligase A, chloroplastic EC=6.3.2.2 AltName: Full=Gamma-ECS A Short=GCS A AltName: Full=Gamma-glutamylcysteine synthetase A Flags: Precursor	-	1412.3	1410.3	1325.6	1278.1	1298.2	1282.4	1.07503	0.0716738	0.104371	Nonsignificant	None	3	Molecular Function:glutamate-cysteine ligase activity (GO:0004357),Biological Process:glutathione biosynthetic process (GO:0006750),Biological Process:cellular modified amino acid biosynthetic process (GO:0042398)	glutamate--cysteine ligase	6.3.2.2	ko00270 Cysteine and methionine metabolism ko00480 Glutathione metabolism ko01100 Metabolic pathways	Gamma-glutamylcysteine synthetase	H	Coenzyme transport and metabolism ;
TRINITY_DN184308_c0_g1	PMA11_ARATH, RecName: Full=ATPase 11, plasma membrane-type EC=3.6.3.6 AltName: Full=Proton pump 11	-	99	109.9	101.1	111.9	102.3	84.7	1.03714	0.700373	0.0526053	Nonsignificant	None	1	Cellular Component:integral component of membrane (GO:0016021)	H+-transporting ATPase	3.6.3.6	ko00190 Oxidative phosphorylation	Magnesium-transporting ATPase (P-type)	P	Inorganic ion transport and metabolism ;
TRINITY_DN182093_c0_g1	ZRP4_MAIZE, RecName: Full=O-methyltransferase ZRP4 Short=OMT EC=2.1.1.-	-	704.5	834.3	948.9	865.4	899.6	965.2	0.911179	0.376452	-0.134194	Nonsignificant	None	3	Molecular Function:methyltransferase activity (GO:0008168),Molecular Function:O-methyltransferase activity (GO:0008171),Molecular Function:protein dimerization activity (GO:0046983)	--	--	--	Ubiquinone/menaquinone biosynthesis C-methylase UbiE	H	Coenzyme transport and metabolism ;
TRINITY_DN187906_c1_g1	TCPZA_ARATH, RecName: Full=T-complex protein 1 subunit zeta 1 {ECO:0000303|PubMed:11599560} Short=TCP-1-zeta 1 {ECO:0000303|PubMed:11599560} AltName: Full=CCT-zeta 1 {ECO:0000303|PubMed:11599560} AltName: Full=Chaperonin CCT6A {ECO:0000305}	-	1919.1	1839.8	1788.4	1862.2	1882.6	1679	1.02277	0.619059	0.0324818	Nonsignificant	None	1	Molecular Function:ATP binding (GO:0005524)	T-complex protein 1 subunit zeta	--	--	Chaperonin GroEL (HSP60 family)	O	Posttranslational modification, protein turnover, chaperones ;
TRINITY_DN176307_c0_g1	PGKY_WHEAT, RecName: Full=Phosphoglycerate kinase, cytosolic EC=2.7.2.3	-	140.7	149.6	130.4	228.5	145.1	185.4	0.752594	0.190805	-0.410056	Nonsignificant	None	2	Molecular Function:phosphoglycerate kinase activity (GO:0004618),Biological Process:glycolytic process (GO:0006096)	phosphoglycerate kinase	2.7.2.3	ko00010 Glycolysis / Gluconeogenesis ko00710 Carbon fixation in photosynthetic organisms ko01100 Metabolic pathways ko01110 Biosynthesis of secondary metabolites ko01200 Carbon metabolism ko01230 Biosynthesis of amino acids	3-phosphoglycerate kinase	G	Carbohydrate transport and metabolism ;
TRINITY_DN200288_c6_g2	SAHH_WHEAT, RecName: Full=Adenosylhomocysteinase Short=AdoHcyase EC=3.3.1.1 AltName: Full=S-adenosyl-L-homocysteine hydrolase	-	1964.5	1691.4	1826.4	1844.4	1697	2014.8	0.9867	0.848863	-0.0193173	Nonsignificant	None	3	Molecular Function:adenosylhomocysteinase activity (GO:0004013),Biological Process:S-adenosylhomocysteine catabolic process (GO:0019510),Molecular Function:NAD binding (GO:0051287)	adenosylhomocysteinase	3.3.1.1	ko00270 Cysteine and methionine metabolism ko01100 Metabolic pathways	S-adenosylhomocysteine hydrolase	H	Coenzyme transport and metabolism ;
TRINITY_DN187091_c9_g1	ACT7_ORYSJ, RecName: Full=Actin-7	-	449.8	454.5	454.7	473.9	414	388.5	1.06471	0.390302	0.0904649	Nonsignificant	None	--	--	actin, other eukaryote	--	--	Actin-related protein	Z	Cytoskeleton ;
TRINITY_DN190181_c0_g1	AROA_ARATH, RecName: Full=3-phosphoshikimate 1-carboxyvinyltransferase, chloroplastic EC=2.5.1.19 AltName: Full=5-enolpyruvylshikimate-3-phosphate synthase Short=EPSP synthase Flags: Precursor	-	1756.9	1718.8	1691.1	1591.3	1576.7	1538.8	1.09773	0.00385908	0.134524	Nonsignificant	None	--	--	3-phosphoshikimate 1-carboxyvinyltransferase	2.5.1.19	ko00400 Phenylalanine, tyrosine and tryptophan biosynthesis ko01100 Metabolic pathways ko01110 Biosynthesis of secondary metabolites ko01230 Biosynthesis of amino acids	5-enolpyruvylshikimate-3-phosphate synthase	E	Amino acid transport and metabolism ;
TRINITY_DN186850_c1_g1	KAD4_ORYSJ, RecName: Full=Adenylate kinase 4 EC=2.7.4.3 AltName: Full=ATP-AMP transphosphorylase 4 AltName: Full=ATP:AMP phosphotransferase AltName: Full=Adenylate kinase B Short=AK B AltName: Full=Adenylate monophosphate kinase 4	-	1501.9	1473.4	1532.5	1414.4	1564.2	1641.9	0.975609	0.634701	-0.0356255	Nonsignificant	None	4	Molecular Function:adenylate kinase activity (GO:0004017),Molecular Function:ATP binding (GO:0005524),Biological Process:nucleobase-containing compound metabolic process (GO:0006139),Molecular Function:nucleobase-containing compound kinase activity (GO:0019205)	adenylate kinase	2.7.4.3	ko00230 Purine metabolism ko00730 Thiamine metabolism ko01100 Metabolic pathways ko01110 Biosynthesis of secondary metabolites	Adenylate kinase or related kinase	F	Nucleotide transport and metabolism ;
TRINITY_DN195388_c0_g2	MET1_ARATH, RecName: Full=Protein MET1, chloroplastic {ECO:0000303|PubMed:25587003} AltName: Full=PDZ domain, K-box domain, and TPR region containing protein {ECO:0000303|PubMed:15914918} Flags: Precursor	-	69.1	83.6	80.6	89.4	78.9	96.8	0.880045	0.196824	-0.18435	Nonsignificant	None	1	Molecular Function:protein binding (GO:0005515)	--	--	--	Tetratricopeptide (TPR) repeat	R	General function prediction only ;
TRINITY_DN187715_c0_g2	GRS11_ORYSJ, RecName: Full=Monothiol glutaredoxin-S11	-	933.8	889.1	863.5	828.9	809	825.4	1.09057	0.0583903	0.125082	Nonsignificant	None	3	Molecular Function:electron carrier activity (GO:0009055),Molecular Function:protein disulfide oxidoreductase activity (GO:0015035),Biological Process:cell redox homeostasis (GO:0045454)	--	--	--	Glutaredoxin-related protein	O	Posttranslational modification, protein turnover, chaperones ;
TRINITY_DN182568_c0_g3	RBS1_ORYSJ, RecName: Full=Ribulose bisphosphate carboxylase small chain, chloroplastic Short=Ribulose bisphosphate carboxylase small chain C Short=RuBisCO small subunit Short=RuBisCO small subunit C EC=4.1.1.39 Flags: Precursor	-	11772.2	12734.6	11866.8	11622.8	13091.4	14085	0.937483	0.382396	-0.0931352	Nonsignificant	None	--	--	ribulose-bisphosphate carboxylase small chain	4.1.1.39	ko00630 Glyoxylate and dicarboxylate metabolism ko00710 Carbon fixation in photosynthetic organisms ko01100 Metabolic pathways ko01200 Carbon metabolism	Ribulose bisphosphate carboxylase small subunit	G	Carbohydrate transport and metabolism ;
TRINITY_DN187579_c0_g1	TL19_ARATH, RecName: Full=Thylakoid lumenal 19 kDa protein, chloroplastic AltName: Full=P19 Flags: Precursor	-	1088.6	1128.4	1212.1	1158.8	1204.9	1187.8	0.965536	0.382746	-0.0505985	Nonsignificant	None	5	Molecular Function:calcium ion binding (GO:0005509),Cellular Component:photosystem II (GO:0009523),Cellular Component:photosystem II oxygen evolving complex (GO:0009654),Biological Process:photosynthesis (GO:0015979),Cellular Component:extrinsic component of membrane (GO:0019898)	--	--	--	--	--	--
TRINITY_DN200733_c2_g1	VLN2_ORYSJ, RecName: Full=Villin-2 {ECO:0000303|PubMed:20807878}	-	1331.3	1268.3	1273.7	1267.4	1302.2	1236.6	1.01763	0.464356	0.0252119	Nonsignificant	None	4	Molecular Function:actin binding (GO:0003779),Biological Process:cytoskeleton organization (GO:0007010),Molecular Function:actin filament binding (GO:0051015),Biological Process:actin filament bundle assembly (GO:0051017)	--	--	--	--	--	--
TRINITY_DN196160_c0_g2	AB7G_ARATH, RecName: Full=ABC transporter G family member 7 Short=ABC transporter ABCG.7 Short=AtABCG7 AltName: Full=White-brown complex homolog protein 7 Short=AtWBC7	-	1698	1651.5	1614.5	1499.2	1554.8	1679.8	1.04863	0.287996	0.0685044	Nonsignificant	None	3	Molecular Function:ATP binding (GO:0005524),Cellular Component:membrane (GO:0016020),Molecular Function:ATPase activity (GO:0016887)	--	--	--	ABC-type multidrug transport system, ATPase component	V	Defense mechanisms ;
TRINITY_DN192513_c3_g1	PPD6_ARATH, RecName: Full=PsbP domain-containing protein 6, chloroplastic AltName: Full=OEC23-like protein 1 Flags: Precursor	-	876.1	932	969.7	941.4	934.9	1121.5	0.926613	0.35942	-0.109961	Nonsignificant	None	5	Molecular Function:calcium ion binding (GO:0005509),Cellular Component:photosystem II (GO:0009523),Cellular Component:photosystem II oxygen evolving complex (GO:0009654),Biological Process:photosynthesis (GO:0015979),Cellular Component:extrinsic component of membrane (GO:0019898)	--	--	--	--	--	--
TRINITY_DN172960_c0_g1	RUBA_PEA, RecName: Full=RuBisCO large subunit-binding protein subunit alpha, chloroplastic AltName: Full=60 kDa chaperonin subunit alpha AltName: Full=CPN-60 alpha Flags: Precursor	-	162.3	124.9	122.9	159.3	119.3	153.6	0.948866	0.701702	-0.0757233	Nonsignificant	None	3	Molecular Function:ATP binding (GO:0005524),Cellular Component:cytoplasm (GO:0005737),Biological Process:protein refolding (GO:0042026)	--	--	--	Chaperonin GroEL (HSP60 family)	O	Posttranslational modification, protein turnover, chaperones ;
TRINITY_DN193956_c1_g1	LACS8_ARATH, RecName: Full=Long chain acyl-CoA synthetase 8 EC=6.2.1.3	-	1430.6	1392.4	1458.5	1373.4	1395.9	1238.7	1.06824	0.196073	0.0952338	Nonsignificant	None	2	Molecular Function:catalytic activity (GO:0003824),Biological Process:metabolic process (GO:0008152)	long-chain acyl-CoA synthetase	6.2.1.3	ko00061 Fatty acid biosynthesis ko00071 Fatty acid degradation ko01100 Metabolic pathways ko01212 Fatty acid metabolism ko04146 Peroxisome	Long-chain acyl-CoA synthetase (AMP-forming)	I	Lipid transport and metabolism ;
TRINITY_DN196060_c0_g1	DHAR1_ORYSJ, RecName: Full=Probable glutathione S-transferase DHAR1, cytosolic {ECO:0000305} EC=2.5.1.18 {ECO:0000305} AltName: Full=GSH-dependent dehydroascorbate reductase 1 {ECO:0000303|PubMed:10648822} Short=OsDHAR1 {ECO:0000303|PubMed:20109239} EC=1.8.5.1 {ECO:0000269|PubMed:19011360} AltName: Full=Glutathione-dependent dehydroascorbate reductase 1 {ECO:0000305}	-	36.8	45.2	45.8	37	40	34.9	1.14209	0.203347	0.191678	Nonsignificant	None	--	--	--	--	ko00053 Ascorbate and aldarate metabolism ko00480 Glutathione metabolism ko01100 Metabolic pathways	--	--	--
TRINITY_DN195542_c1_g1	ERD7_ARATH, RecName: Full=Protein EARLY-RESPONSIVE TO DEHYDRATION 7, chloroplastic {ECO:0000303|PubMed:8075396} Flags: Precursor	-	1041.7	1002.6	1002.8	988.8	990.3	983.1	1.02866	0.158051	0.0407678	Nonsignificant	None	--	--	spartin	--	ko04144 Endocytosis	--	--	--
TRINITY_DN201072_c3_g2	SPSA5_ORYSJ, RecName: Full=Probable sucrose-phosphate synthase 5 EC=2.4.1.14 AltName: Full=Sucrose phosphate synthase 5F Short=OsSPS5F AltName: Full=UDP-glucose-fructose-phosphate glucosyltransferase	-	1104.3	1135.8	1142	1205.1	1105.7	1201.3	0.962985	0.313987	-0.0544146	Nonsignificant	None	--	--	sucrose-phosphate synthase	2.4.1.14	ko00500 Starch and sucrose metabolism ko01100 Metabolic pathways	Hydroxymethylpyrimidine pyrophosphatase and other HAD family phosphatases	HR	Coenzyme transport and metabolism ; General function prediction only ;
TRINITY_DN186509_c0_g1	6PGD2_ORYSJ, RecName: Full=6-phosphogluconate dehydrogenase, decarboxylating 2, chloroplastic Short=OsG6PGH2 EC=1.1.1.44 Flags: Precursor	-	1311.5	1259.5	1293.1	1244.6	1175.3	1284.4	1.04314	0.232758	0.0609315	Nonsignificant	None	3	Molecular Function:phosphogluconate dehydrogenase (decarboxylating) activity (GO:0004616),Biological Process:pentose-phosphate shunt (GO:0006098),Biological Process:oxidation-reduction process (GO:0055114)	--	--	ko00030 Pentose phosphate pathway ko00480 Glutathione metabolism ko01100 Metabolic pathways ko01110 Biosynthesis of secondary metabolites ko01200 Carbon metabolism	6-phosphogluconate dehydrogenase	G	Carbohydrate transport and metabolism ;
TRINITY_DN199750_c0_g3	ALFP_ORYSJ, RecName: Full=Fructose-bisphosphate aldolase, chloroplastic {ECO:0000305} EC=4.1.2.13 {ECO:0000305} AltName: Full=Chloroplastic aldolase {ECO:0000303|PubMed:8163192} Short=AldP {ECO:0000303|PubMed:8163192} Flags: Precursor	-	206.3	263.2	227.2	216.8	248.2	256.1	0.966163	0.713677	-0.0496618	Nonsignificant	None	2	Molecular Function:fructose-bisphosphate aldolase activity (GO:0004332),Biological Process:glycolytic process (GO:0006096)	fructose-bisphosphate aldolase, class I	4.1.2.13	ko00010 Glycolysis / Gluconeogenesis ko00030 Pentose phosphate pathway ko00051 Fructose and mannose metabolism ko00710 Carbon fixation in photosynthetic organisms ko01100 Metabolic pathways ko01110 Biosynthesis of secondary metabolites ko01200 Carbon metabolism ko01230 Biosynthesis of amino acids	Fructose-bisphosphate aldolase class 1	G	Carbohydrate transport and metabolism ;
TRINITY_DN194678_c1_g1	TKTC_MAIZE, RecName: Full=Transketolase, chloroplastic Short=TK EC=2.2.1.1	-	410.7	418.5	468.3	805	380.5	430.4	0.802958	0.512082	-0.316603	Nonsignificant	None	--	--	transketolase	2.2.1.1	ko00030 Pentose phosphate pathway ko00710 Carbon fixation in photosynthetic organisms ko01100 Metabolic pathways ko01110 Biosynthesis of secondary metabolites ko01200 Carbon metabolism ko01230 Biosynthesis of amino acids	Transketolase	G	Carbohydrate transport and metabolism ;
TRINITY_DN192871_c0_g1	CBSX1_ARATH, RecName: Full=CBS domain-containing protein CBSX1, chloroplastic AltName: Full=CBS domain-containing protein 2 Short=AtCDCP2 AltName: Full=Protein LOSS OF THE TIMING OF ET AND JA BIOSYNTHESIS 2 Short=AtLEJ2 Flags: Precursor	-	1062.7	1084.4	1034.2	1162.5	1226.9	1239.8	0.876584	0.0100413	-0.190035	Nonsignificant	None	--	--	--	--	--	CBS domain	T	Signal transduction mechanisms ;
TRINITY_DN190022_c2_g1	RAH1B_ARATH, RecName: Full=Ras-related protein RABH1b Short=AtRABH1b AltName: Full=Ras-related protein Rab6A Short=AtRab6A	-	1887.5	1716.1	1829.7	1845.4	1788.2	1823.3	0.995675	0.893481	-0.0062529	Nonsignificant	None	2	Molecular Function:GTP binding (GO:0005525),Biological Process:small GTPase mediated signal transduction (GO:0007264)	Ras-related protein Rab-6A	--	--	GTPase SAR1 family domain	R	General function prediction only ;
TRINITY_DN177352_c3_g1	METK4_HORVU, RecName: Full=S-adenosylmethionine synthase 4 Short=AdoMet synthase 4 EC=2.5.1.6 {ECO:0000250|UniProtKB:Q96551} AltName: Full=Methionine adenosyltransferase 4 Short=MAT 4	-	1296.2	1111.8	1164.1	1063.2	1175	1202.6	1.03816	0.56488	0.0540284	Nonsignificant	None	3	Molecular Function:methionine adenosyltransferase activity (GO:0004478),Molecular Function:ATP binding (GO:0005524),Biological Process:S-adenosylmethionine biosynthetic process (GO:0006556)	S-adenosylmethionine synthetase	2.5.1.6	ko00270 Cysteine and methionine metabolism ko01100 Metabolic pathways ko01110 Biosynthesis of secondary metabolites ko01230 Biosynthesis of amino acids	S-adenosylmethionine synthetase	H	Coenzyme transport and metabolism ;
TRINITY_DN201521_c2_g1	ACC2_ORYSJ, RecName: Full=Acetyl-CoA carboxylase 2 EC=6.4.1.2 Includes: RecName: Full=Biotin carboxylase EC=6.3.4.14	-	1360.1	1335.2	1300.8	1288	1361.2	1326.4	1.00516	0.814821	0.00742008	Nonsignificant	None	4	Molecular Function:acetyl-CoA carboxylase activity (GO:0003989),Molecular Function:ATP binding (GO:0005524),Biological Process:fatty acid biosynthetic process (GO:0006633),Molecular Function:ligase activity (GO:0016874)	--	--	ko00061 Fatty acid biosynthesis ko00620 Pyruvate metabolism ko00640 Propanoate metabolism ko01100 Metabolic pathways ko01110 Biosynthesis of secondary metabolites ko01212 Fatty acid metabolism	Acetyl-CoA carboxylase, carboxyltransferase component	I	Lipid transport and metabolism ;
TRINITY_DN200074_c1_g2	HSP81_ORYSJ, RecName: Full=Heat shock protein 81-1 Short=HSP81-1 AltName: Full=Heat shock protein 82	-	193.9	174.8	187.2	196.7	211.9	178.5	0.946857	0.416028	-0.0787809	Nonsignificant	None	4	Molecular Function:ATP binding (GO:0005524),Biological Process:protein folding (GO:0006457),Biological Process:response to stress (GO:0006950),Molecular Function:unfolded protein binding (GO:0051082)	molecular chaperone HtpG	--	ko04141 Protein processing in endoplasmic reticulum ko04626 Plant-pathogen interaction	Molecular chaperone, HSP90 family	O	Posttranslational modification, protein turnover, chaperones ;
TRINITY_DN166880_c1_g1	TKTC_MAIZE, RecName: Full=Transketolase, chloroplastic Short=TK EC=2.2.1.1	-	346.1	450.6	398.5	420.5	330.4	448.7	0.996332	0.976499	-0.00530137	Nonsignificant	None	--	--	transketolase	2.2.1.1	ko00030 Pentose phosphate pathway ko00710 Carbon fixation in photosynthetic organisms ko01100 Metabolic pathways ko01110 Biosynthesis of secondary metabolites ko01200 Carbon metabolism ko01230 Biosynthesis of amino acids	Transketolase	G	Carbohydrate transport and metabolism ;
TRINITY_DN176282_c2_g2	U71K2_PYRCO, RecName: Full=UDP-glycosyltransferase 71K2 {ECO:0000303|Ref.1} EC=2.4.1.- {ECO:0000305} AltName: Full=UDP-glucose:chalcone 2-O-glucosyltransferase {ECO:0000305} AltName: Full=UDP-glucose:flavonol 2-O-glucosyltransferase {ECO:0000305}	-	1102.4	1041.2	1094.9	997.6	1020.2	934.7	1.09687	0.0448337	0.133389	Nonsignificant	None	1	Biological Process:metabolic process (GO:0008152)	--	--	--	UDP:flavonoid glycosyltransferase YjiC, YdhE family	G	Carbohydrate transport and metabolism ;
TRINITY_DN198871_c1_g1	VHAA3_ARATH, RecName: Full=V-type proton ATPase subunit a3 Short=V-ATPase subunit a3 AltName: Full=V-type proton ATPase 95 kDa subunit a isoform 3 Short=V-ATPase 95 kDa isoform a3 AltName: Full=Vacuolar H(+)-ATPase subunit a isoform 3 AltName: Full=Vacuolar proton pump subunit a3 AltName: Full=Vacuolar proton translocating ATPase 95 kDa subunit a isoform 3	-	317.6	320	322.9	344.7	374.8	303.7	0.938722	0.417244	-0.0912306	Nonsignificant	None	2	Molecular Function:hydrogen ion transmembrane transporter activity (GO:0015078),Biological Process:ATP hydrolysis coupled proton transport (GO:0015991)	V-type H+-transporting ATPase subunit a	--	ko00190 Oxidative phosphorylation ko01100 Metabolic pathways ko04145 Phagosome	Archaeal/vacuolar-type H+-ATPase subunit I/STV1	C	Energy production and conversion ;
TRINITY_DN198283_c1_g1	ACOC_ORYSJ, RecName: Full=Putative aconitate hydratase, cytoplasmic Short=Aconitase EC=4.2.1.3 AltName: Full=Citrate hydro-lyase	-	204	195.2	213.2	208.1	193.6	193	1.02976	0.456772	0.0423122	Nonsignificant	None	1	Biological Process:metabolic process (GO:0008152)	aconitate hydratase	4.2.1.3	ko00020 Citrate cycle (TCA cycle) ko00630 Glyoxylate and dicarboxylate metabolism ko01100 Metabolic pathways ko01110 Biosynthesis of secondary metabolites ko01200 Carbon metabolism ko01210 2-Oxocarboxylic acid metabolism ko01230 Biosynthesis of amino acids	Aconitase A	C	Energy production and conversion ;
TRINITY_DN193124_c2_g2	PPL1_ARATH, RecName: Full=PsbP-like protein 1, chloroplastic AltName: Full=OEC23-like protein 4 AltName: Full=PsbP-related thylakoid lumenal protein 2 Flags: Precursor	-	1083.9	1078.9	1133.3	1136.5	1134.3	1171.4	0.957556	0.0905317	-0.0625709	Nonsignificant	None	5	Molecular Function:calcium ion binding (GO:0005509),Cellular Component:photosystem II (GO:0009523),Cellular Component:photosystem II oxygen evolving complex (GO:0009654),Biological Process:photosynthesis (GO:0015979),Cellular Component:extrinsic component of membrane (GO:0019898)	photosystem II oxygen-evolving enhancer protein 2	--	ko00195 Photosynthesis ko01100 Metabolic pathways	--	--	--
TRINITY_DN197574_c1_g2	HSP7M_PHAVU, RecName: Full=Heat shock 70 kDa protein, mitochondrial Flags: Precursor	-	451.2	484.1	444.6	479.5	451.7	379.7	1.05264	0.532047	0.0740061	Nonsignificant	None	--	--	molecular chaperone DnaK	--	ko03018 RNA degradation	Membrane protein involved in colicin uptake	M	Cell wall/membrane/envelope biogenesis ;
TRINITY_DN188267_c0_g1	OLA1_ORYSJ, RecName: Full=Obg-like ATPase 1 {ECO:0000255|HAMAP-Rule:MF_03167} EC=3.6.5.- {ECO:0000269|PubMed:19086295} AltName: Full=Ribosome-binding ATPase YchF {ECO:0000303|PubMed:23550829} Short=OsYchF1 {ECO:0000303|PubMed:23550829}	-	1013.6	997.6	993.9	1016	1021.2	984.3	0.994572	0.702646	-0.00785194	Nonsignificant	None	1	Molecular Function:GTP binding (GO:0005525)	obg-like ATPase 1	--	--	Ribosome-binding ATPase YchF, GTP1/OBG family	J	Translation, ribosomal structure and biogenesis ;
TRINITY_DN194040_c0_g1	4CLL1_ORYSJ, RecName: Full=4-coumarate--CoA ligase-like 1 EC=6.2.1.-	-	869.5	781.8	831.8	759.6	752.8	748.8	1.09813	0.0982791	0.135054	Nonsignificant	None	2	Molecular Function:catalytic activity (GO:0003824),Biological Process:metabolic process (GO:0008152)	4-coumarate--CoA ligase	6.2.1.12	ko00130 Ubiquinone and other terpenoid-quinone biosynthesis ko00360 Phenylalanine metabolism ko00940 Phenylpropanoid biosynthesis ko01100 Metabolic pathways ko01110 Biosynthesis of secondary metabolites	Acyl-CoA synthetase (AMP-forming)/AMP-acid ligase II	IQ	Lipid transport and metabolism ; Secondary metabolites biosynthesis, transport and catabolism ;
TRINITY_DN199125_c0_g1	DCYD1_ORYSJ, RecName: Full=Putative D-cysteine desulfhydrase 1, mitochondrial EC=4.4.1.15 AltName: Full=OsD-CDes1 Short=D-CDes1 Flags: Precursor	-	1409.5	1431.6	1495.9	1411.7	1320.9	1523.2	1.01908	0.703093	0.0272671	Nonsignificant	None	--	--	D-cysteine desulfhydrase	4.4.1.15	ko00270 Cysteine and methionine metabolism	1-aminocyclopropane-1-carboxylate deaminase/D-cysteine desulfhydrase, PLP-dependent ACC family	E	Amino acid transport and metabolism ;
TRINITY_DN198121_c0_g2	SYLC_ARATH, RecName: Full=Leucine--tRNA ligase, cytoplasmic {ECO:0000305} EC=6.1.1.4 {ECO:0000305} AltName: Full=Leucyl-tRNA synthetase {ECO:0000305} Short=LeuRS {ECO:0000305}	-	1362.6	1275.5	1331.1	1248.6	1337	1301.6	1.02109	0.49188	0.0301169	Nonsignificant	None	7	Molecular Function:nucleotide binding (GO:0000166),Molecular Function:aminoacyl-tRNA ligase activity (GO:0004812),Molecular Function:leucine-tRNA ligase activity (GO:0004823),Molecular Function:ATP binding (GO:0005524),Cellular Component:cytoplasm (GO:0005737),Biological Process:tRNA aminoacylation for protein translation (GO:0006418),Biological Process:leucyl-tRNA aminoacylation (GO:0006429)	leucyl-tRNA synthetase	6.1.1.4	ko00970 Aminoacyl-tRNA biosynthesis	Leucyl-tRNA synthetase	J	Translation, ribosomal structure and biogenesis ;
TRINITY_DN190961_c0_g2	VATH_ORYSJ, RecName: Full=Probable V-type proton ATPase subunit H Short=V-ATPase subunit H AltName: Full=Vacuolar proton pump subunit H	-	93.7	105	94.4	97.4	104.9	99.4	0.971495	0.547424	-0.0417217	Nonsignificant	None	1	Biological Process:ATP hydrolysis coupled proton transport (GO:0015991)	V-type H+-transporting ATPase subunit H	--	ko00190 Oxidative phosphorylation ko01100 Metabolic pathways ko04145 Phagosome	--	--	--
TRINITY_DN192720_c0_g2	PSA3_ORYSJ, RecName: Full=Proteasome subunit alpha type-3 EC=3.4.25.1 AltName: Full=20S proteasome alpha subunit G AltName: Full=20S proteasome subunit alpha-7	-	2010	1960.6	2105.9	1976.2	1902.1	1846	1.06153	0.109237	0.0861413	Nonsignificant	None	5	Molecular Function:endopeptidase activity (GO:0004175),Molecular Function:threonine-type endopeptidase activity (GO:0004298),Cellular Component:proteasome core complex (GO:0005839),Biological Process:ubiquitin-dependent protein catabolic process (GO:0006511),Biological Process:proteolysis involved in cellular protein catabolic process (GO:0051603)	20S proteasome subunit alpha 7	3.4.25.1	ko03050 Proteasome	20S proteasome, alpha and beta subunits	O	Posttranslational modification, protein turnover, chaperones ;
TRINITY_DN200911_c3_g1	CHLP_ORYSJ, RecName: Full=Geranylgeranyl diphosphate reductase, chloroplastic EC=1.3.1.83 AltName: Full=Geranylgeranyl reductase Flags: Precursor	-	876.9	842.6	836.3	840.7	839.5	866.1	1.00373	0.847455	0.00537254	Nonsignificant	None	2	Molecular Function:oxidoreductase activity (GO:0016491),Biological Process:oxidation-reduction process (GO:0055114)	--	--	ko00860 Porphyrin and chlorophyll metabolism ko00900 Terpenoid backbone biosynthesis ko01100 Metabolic pathways ko01110 Biosynthesis of secondary metabolites	Dehydrogenase (flavoprotein)	C	Energy production and conversion ;
TRINITY_DN199178_c1_g1	YCF39_CYAPA, RecName: Full=Uncharacterized protein ycf39 EC=1.-.-.-	-	1412.7	1417.9	1373.6	1483.9	1526.9	1537.5	0.924345	0.00641268	-0.113496	Nonsignificant	None	--	--	--	--	--	Uncharacterized conserved protein YbjT, contains NAD(P)-binding and DUF2867 domains	R	General function prediction only ;
TRINITY_DN184013_c0_g4	FDH1_ORYSJ, RecName: Full=Formate dehydrogenase 1, mitochondrial {ECO:0000255|HAMAP-Rule:MF_03210} Short=FDH 1 {ECO:0000255|HAMAP-Rule:MF_03210} EC=1.17.1.9 {ECO:0000255|HAMAP-Rule:MF_03210} AltName: Full=NAD-dependent formate dehydrogenase 1 {ECO:0000255|HAMAP-Rule:MF_03210, ECO:0000303|Ref.1} Flags: Precursor	-	2004.1	2044.1	2083.4	2009	1887.1	1743.9	1.08716	0.157414	0.120568	Nonsignificant	None	3	Biological Process:metabolic process (GO:0008152),Molecular Function:NAD binding (GO:0051287),Biological Process:oxidation-reduction process (GO:0055114)	formate dehydrogenase	1.17.1.9	ko00630 Glyoxylate and dicarboxylate metabolism ko01100 Metabolic pathways ko01200 Carbon metabolism	Lactate dehydrogenase or related 2-hydroxyacid dehydrogenase	CHR	Energy production and conversion ; Coenzyme transport and metabolism ; General function prediction only ;
TRINITY_DN197162_c1_g1	HS905_ARATH, RecName: Full=Heat shock protein 90-5, chloroplastic {ECO:0000305} Short=AtHSP90.5 {ECO:0000305} Short=AtHsp90-5 {ECO:0000303|PubMed:11599565} AltName: Full=Heat shock protein 88-1 {ECO:0000305} Short=Hsp88-1 {ECO:0000303|PubMed:11599565} AltName: Full=Hsp90C {ECO:0000303|PubMed:23382192} AltName: Full=Protein EMBRYO DEFECTIVE 1956 {ECO:0000303|PubMed:23382192} AltName: Full=Protein …	-	227.9	243	247.8	249.4	246.1	251.9	0.9616	0.247668	-0.0564909	Nonsignificant	None	4	Molecular Function:ATP binding (GO:0005524),Biological Process:protein folding (GO:0006457),Biological Process:response to stress (GO:0006950),Molecular Function:unfolded protein binding (GO:0051082)	heat shock protein 90kDa beta	--	ko04141 Protein processing in endoplasmic reticulum ko04626 Plant-pathogen interaction	Molecular chaperone, HSP90 family	O	Posttranslational modification, protein turnover, chaperones ;
TRINITY_DN195235_c0_g1	CAS2_MALDO, RecName: Full=L-3-cyanoalanine synthase 2, mitochondrial Short=MdCAS2 EC=4.4.1.9 Flags: Precursor	-	1279	1242.6	1293.9	1172	1193.5	1357.4	1.02487	0.655242	0.0354453	Nonsignificant	None	4	Molecular Function:cysteine synthase activity (GO:0004124),Cellular Component:mitochondrion (GO:0005739),Biological Process:cyanide metabolic process (GO:0019499),Molecular Function:L-3-cyanoalanine synthase activity (GO:0050017)	--	--	ko00270 Cysteine and methionine metabolism ko00460 Cyanoamino acid metabolism ko00920 Sulfur metabolism ko01100 Metabolic pathways ko01110 Biosynthesis of secondary metabolites ko01200 Carbon metabolism ko01230 Biosynthesis of amino acids	Cysteine synthase	E	Amino acid transport and metabolism ;
TRINITY_DN199926_c3_g2	NDC1_ARATH, RecName: Full=Alternative NAD(P)H-ubiquinone oxidoreductase C1, chloroplastic/mitochondrial {ECO:0000303|PubMed:15333756} EC=1.6.5.9 {ECO:0000269|PubMed:21844348} AltName: Full=Alternative NADH dehydrogenase NDC1 {ECO:0000303|PubMed:15333756} AltName: Full=Demethylphylloquinone reductase NDC1 {ECO:0000303|PubMed:26023160} EC=1.6.5.12 {ECO:0000269|PubMed:21844348, ECO:0000269|PubMed:26…	-	342.1	353.1	353.8	477.9	370.8	332.6	0.888005	0.417365	-0.171361	Nonsignificant	None	2	Molecular Function:oxidoreductase activity (GO:0016491),Biological Process:oxidation-reduction process (GO:0055114)	NADH:ubiquinone reductase (non-electrogenic)	1.6.5.9	--	NADH dehydrogenase, FAD-containing subunit	C	Energy production and conversion ;
TRINITY_DN167438_c0_g1	IFRH_MAIZE, RecName: Full=Isoflavone reductase homolog IRL EC=1.3.1.-	-	1387.6	963.8	985.8	1028.6	1344.9	1571.4	0.845953	0.388559	-0.241351	Nonsignificant	None	--	--	--	--	--	Uncharacterized conserved protein YbjT, contains NAD(P)-binding and DUF2867 domains	R	General function prediction only ;
TRINITY_DN190695_c2_g1	SUCB_ORYSJ, RecName: Full=Succinate--CoA ligase [ADP-forming] subunit beta, mitochondrial {ECO:0000255|HAMAP-Rule:MF_03219} EC=6.2.1.5 {ECO:0000255|HAMAP-Rule:MF_03219} AltName: Full=Succinyl-CoA synthetase beta chain {ECO:0000255|HAMAP-Rule:MF_03219} Short=SCS-beta {ECO:0000255|HAMAP-Rule:MF_03219} Flags: Precursor	-	267.4	265.8	273.8	262.6	284.7	252.3	1.00925	0.823479	0.0132902	Nonsignificant	None	2	Molecular Function:catalytic activity (GO:0003824),Biological Process:metabolic process (GO:0008152)	--	--	ko00020 Citrate cycle (TCA cycle) ko00640 Propanoate metabolism ko01100 Metabolic pathways ko01110 Biosynthesis of secondary metabolites ko01200 Carbon metabolism	Succinyl-CoA synthetase, beta subunit	C	Energy production and conversion ;
TRINITY_DN187338_c0_g1	TOCC_ORYSJ, RecName: Full=Probable tocopherol cyclase, chloroplastic AltName: Full=Vitamin E pathway gene 1 protein Flags: Precursor	-	1160.2	1238.8	1291.4	1194.6	1149.6	987.3	1.10773	0.194414	0.147605	Nonsignificant	None	1	Molecular Function:tocopherol cyclase activity (GO:0009976)	tocopherol cyclase	5.5.1.24	ko00130 Ubiquinone and other terpenoid-quinone biosynthesis ko01100 Metabolic pathways ko01110 Biosynthesis of secondary metabolites	--	--	--
TRINITY_DN199340_c0_g1	KEA2_ARATH, RecName: Full=K(+) efflux antiporter 2, chloroplastic {ECO:0000303|PubMed:11500563} Short=AtKEA2 {ECO:0000303|PubMed:11500563} Flags: Precursor	-	69.5	73.9	63.2	71.1	81.5	68.9	0.932731	0.377066	-0.100466	Nonsignificant	None	5	Biological Process:cation transport (GO:0006812),Biological Process:potassium ion transport (GO:0006813),Molecular Function:solute:proton antiporter activity (GO:0015299),Cellular Component:integral component of membrane (GO:0016021),Biological Process:transmembrane transport (GO:0055085)	--	--	--	Voltage-gated potassium channel Kch	P	Inorganic ion transport and metabolism ;
TRINITY_DN199970_c0_g1	NDHN_ARATH, RecName: Full=NAD(P)H-quinone oxidoreductase subunit N, chloroplastic {ECO:0000305} EC=1.6.5.- {ECO:0000305} AltName: Full=NAD(P)H dehydrogenase subunit N {ECO:0000303|PubMed:21785130} Short=NDH subunit N {ECO:0000305} Short=NDH-N {ECO:0000303|PubMed:15608332} AltName: Full=NADH-plastoquinone oxidoreductase subunit N {ECO:0000305} Flags: Precursor	-	1500.2	1771.2	1815.9	1665.1	1720.2	1845.2	0.972622	0.698297	-0.0400487	Nonsignificant	None	2	Cellular Component:membrane (GO:0016020),Biological Process:oxidation-reduction process (GO:0055114)	--	--	--	--	--	--
TRINITY_DN199665_c0_g1	TPR3_ORYSJ, RecName: Full=Protein TPR3 {ECO:0000303|PubMed:24336200} AltName: Full=Aberrant spikelet and panicle1-related 1 {ECO:0000303|PubMed:22136599} AltName: Full=Protein ASP1-RELATED 1 {ECO:0000303|PubMed:22136599} Short=OsASPR1 {ECO:0000303|PubMed:22136599} AltName: Full=Topless-related protein 1 {ECO:0000303|PubMed:26601214} Short=OsTPR1 {ECO:0000303|PubMed:26601214} AltName: Full=Topless…	-	1401.9	1400.4	1460.4	1512.7	1460.9	1320.1	0.99278	0.878083	-0.0104539	Nonsignificant	None	1	Molecular Function:protein binding (GO:0005515)	--	--	--	Predicted ATPase	R	General function prediction only ;
TRINITY_DN199826_c1_g1	NDC1_ARATH, RecName: Full=Alternative NAD(P)H-ubiquinone oxidoreductase C1, chloroplastic/mitochondrial {ECO:0000303|PubMed:15333756} EC=1.6.5.9 {ECO:0000269|PubMed:21844348} AltName: Full=Alternative NADH dehydrogenase NDC1 {ECO:0000303|PubMed:15333756} AltName: Full=Demethylphylloquinone reductase NDC1 {ECO:0000303|PubMed:26023160} EC=1.6.5.12 {ECO:0000269|PubMed:21844348, ECO:0000269|PubMed:26…	-	1291.2	1379.6	1413.9	1759.1	1338.5	1201.6	0.950107	0.714371	-0.0738381	Nonsignificant	None	4	Biological Process:metabolic process (GO:0008152),Molecular Function:oxidoreductase activity (GO:0016491),Molecular Function:hydrolase activity (GO:0016787),Biological Process:oxidation-reduction process (GO:0055114)	NADH:ubiquinone reductase (non-electrogenic)	1.6.5.9	--	NADH dehydrogenase, FAD-containing subunit	C	Energy production and conversion ;
TRINITY_DN190275_c0_g1	ATPG3_IPOBA, RecName: Full=ATP synthase subunit gamma, mitochondrial AltName: Full=F-ATPase gamma subunit Flags: Precursor	-	1171.7	1174.7	1224.5	1114.1	1184.5	1128.6	1.04193	0.159512	0.0592573	Nonsignificant	None	1	Biological Process:ATP synthesis coupled proton transport (GO:0015986)	F-type H+-transporting ATPase subunit gamma	--	ko00190 Oxidative phosphorylation ko01100 Metabolic pathways	FoF1-type ATP synthase, gamma subunit	C	Energy production and conversion ;
TRINITY_DN200444_c2_g4	RRFC_ORYSJ, RecName: Full=Ribosome-recycling factor, chloroplastic Short=RRF AltName: Full=Protein OsL8 AltName: Full=Ribosome-releasing factor, chloroplastic Flags: Precursor	-	1359.2	1329.2	1325.5	1346.4	1423.4	1637.9	0.910656	0.270306	-0.135021	Nonsignificant	None	1	Biological Process:translation (GO:0006412)	ribosome recycling factor	--	--	Ribosome recycling factor	J	Translation, ribosomal structure and biogenesis ;
TRINITY_DN183594_c0_g1	Y4967_ARATH, RecName: Full=Uncharacterized oxidoreductase At4g09670 EC=1.-.-.-	-	1097.6	1041.2	1080.9	1040.3	1127.7	1275.3	0.935062	0.391548	-0.0968656	Nonsignificant	None	1	Molecular Function:oxidoreductase activity (GO:0016491)	--	--	--	Predicted dehydrogenase	R	General function prediction only ;
TRINITY_DN177913_c2_g1	IN21B_ORYSJ, RecName: Full=Protein IN2-1 homolog B AltName: Full=Glutathione S-transferase GSTZ5	-	605.4	581.8	557.9	648.5	663.3	713.8	0.861523	0.0220459	-0.21504	Nonsignificant	None	1	Molecular Function:protein binding (GO:0005515)	glutathione S-transferase	2.5.1.18	ko00480 Glutathione metabolism	Glutathione S-transferase	O	Posttranslational modification, protein turnover, chaperones ;
TRINITY_DN200435_c2_g1	LPA3_ARATH, RecName: Full=Protein LOW PSII ACCUMULATION 3, chloroplastic Flags: Precursor	-	1522	1603.2	1457.7	1522.3	1665.1	1517	0.974173	0.563188	-0.0377499	Nonsignificant	None	--	--	--	--	--	--	--	--
TRINITY_DN201909_c2_g1	SGAT_ARATH, RecName: Full=Serine--glyoxylate aminotransferase EC=2.6.1.45 {ECO:0000269|PubMed:18235971, ECO:0000269|PubMed:23098902} AltName: Full=Alanine--glyoxylate aminotransferase Short=AGT EC=2.6.1.44 {ECO:0000269|PubMed:18235971, ECO:0000269|PubMed:23098902} AltName: Full=Asparagine aminotransferase EC=2.6.1.- AltName: Full=Serine--pyruvate aminotransferase EC=2.6.1.51 {ECO:0000269|PubMed:2…	-	797.6	872.3	779.9	895.1	857.6	862.8	0.936647	0.180676	-0.0944228	Nonsignificant	None	--	--	--	--	ko00250 Alanine, aspartate and glutamate metabolism ko00260 Glycine, serine and threonine metabolism ko00630 Glyoxylate and dicarboxylate metabolism ko01100 Metabolic pathways ko01110 Biosynthesis of secondary metabolites ko01200 Carbon metabolism ko04146 Peroxisome	Archaeal aspartate aminotransferase or a related aminotransferase, includes purine catabolism protein PucG	EF	Amino acid transport and metabolism ; Nucleotide transport and metabolism ;
TRINITY_DN185865_c4_g1	--	-	1180.3	1189	1162.4	1201.4	1141.5	1097.3	1.0266	0.420302	0.0378704	Nonsignificant	None	1	Biological Process:response to desiccation (GO:0009269)	--	--	--	LEA14-like dessication related protein	V	Defense mechanisms ;
TRINITY_DN199649_c1_g1	AB1K1_ARATH, RecName: Full=Protein ACTIVITY OF BC1 COMPLEX KINASE 1, chloroplastic {ECO:0000303|PubMed:23673981} Short=ABC1-LIKE KINASE 1 {ECO:0000303|PubMed:23673981} EC=2.7.-.- {ECO:0000255|PROSITE-ProRule:PRU00159} EC=2.7.11.1 {ECO:0000269|PubMed:24267661} AltName: Full=Protein ABC1-LIKE KINASE RELATED TO CHLOROPHYLL DEGRADATION AND OXIDATIVE STRESS 1 {ECO:0000303|PubMed:22447966} Short=AtACDO…	-	1135.7	1106.6	1165.3	1083.4	1093.7	1081.6	1.04569	0.0930653	0.0644595	Nonsignificant	None	3	Molecular Function:protein kinase activity (GO:0004672),Molecular Function:ATP binding (GO:0005524),Biological Process:protein phosphorylation (GO:0006468)	--	--	--	Predicted unusual protein kinase regulating ubiquinone biosynthesis, AarF/ABC1/UbiB family	HT	Coenzyme transport and metabolism ; Signal transduction mechanisms ;
TRINITY_DN186232_c1_g3	CDSP_ORYSJ, RecName: Full=Thioredoxin-like protein CDSP32, chloroplastic AltName: Full=Chloroplastic drought-induced stress protein of 32 KDa Short=OsCDSP32 Flags: Precursor	-	1487.5	1592.4	1540.7	1622.7	1586.5	1602.6	0.960264	0.160122	-0.0584965	Nonsignificant	None	3	Biological Process:glycerol ether metabolic process (GO:0006662),Molecular Function:protein disulfide oxidoreductase activity (GO:0015035),Biological Process:cell redox homeostasis (GO:0045454)	--	--	--	Negative regulator of GroEL, contains thioredoxin-like and TPR-like domains	O	Posttranslational modification, protein turnover, chaperones ;
TRINITY_DN160689_c1_g1	CPNB3_ARATH, RecName: Full=Chaperonin 60 subunit beta 3, chloroplastic Short=CPN-60 beta 3 Flags: Precursor	-	512.7	364.4	409.7	522.9	336.7	350.1	1.06373	0.748348	0.0891385	Nonsignificant	None	1	Molecular Function:ATP binding (GO:0005524)	chaperonin GroEL	--	ko03018 RNA degradation	Chaperonin GroEL (HSP60 family)	O	Posttranslational modification, protein turnover, chaperones ;
TRINITY_DN199726_c1_g1	SYVM2_ARATH, RecName: Full=Valine--tRNA ligase, chloroplastic/mitochondrial 2 {ECO:0000305} EC=6.1.1.9 {ECO:0000305} AltName: Full=Protein EMBRYO DEFECTIVE 2247 {ECO:0000303|PubMed:16297076} AltName: Full=Valyl-tRNA synthetase {ECO:0000305} Short=ValRS {ECO:0000305} Flags: Precursor	-	1485	1560.1	1612.6	1540.1	1622.7	1446.3	1.01054	0.810865	0.0151326	Nonsignificant	None	6	Molecular Function:nucleotide binding (GO:0000166),Molecular Function:aminoacyl-tRNA ligase activity (GO:0004812),Molecular Function:valine-tRNA ligase activity (GO:0004832),Molecular Function:ATP binding (GO:0005524),Biological Process:tRNA aminoacylation for protein translation (GO:0006418),Biological Process:valyl-tRNA aminoacylation (GO:0006438)	valyl-tRNA synthetase	6.1.1.9	ko00970 Aminoacyl-tRNA biosynthesis	Valyl-tRNA synthetase	J	Translation, ribosomal structure and biogenesis ;
TRINITY_DN179028_c0_g2	EF2_ARATH, RecName: Full=Elongation factor 2 {ECO:0000305} Short=EF-2 {ECO:0000305} AltName: Full=Protein LOW EXPRESSION OF OSMOTICALLY RESPONSIVE GENES 1 {ECO:0000303|PubMed:9401119}	-	1784.2	1777	1794.8	1845.2	1656.5	1775.5	1.01493	0.68106	0.0213833	Nonsignificant	None	1	Molecular Function:GTP binding (GO:0005525)	elongation factor 2	--		Translation elongation factor EF-G, a GTPase	J	Translation, ribosomal structure and biogenesis ;
TRINITY_DN199888_c2_g1	KN14L_ORYSJ, RecName: Full=Kinesin-like protein KIN-14L {ECO:0000305}	-	1028.9	1047.1	1006.1	1059	1088.9	951.1	0.994547	0.907335	-0.00788908	Nonsignificant	None	5	Molecular Function:microtubule motor activity (GO:0003777),Molecular Function:ATP binding (GO:0005524),Biological Process:microtubule-based movement (GO:0007018),Molecular Function:microtubule binding (GO:0008017),Biological Process:chloroplast accumulation movement (GO:0009904)	--	--	--	--	--	--
TRINITY_DN183515_c1_g2	GLO1_ORYSJ, RecName: Full=Peroxisomal (S)-2-hydroxy-acid oxidase GLO1 EC=1.1.3.15 AltName: Full=Glycolate oxidase 1 Short=GOX 1 Short=OsGLO1 AltName: Full=Short chain alpha-hydroxy acid oxidase GLO1	-	38.9	45.4	53.4	63	27.4	68.5	0.866583	0.645819	-0.206591	Nonsignificant	None	3	Molecular Function:FMN binding (GO:0010181),Molecular Function:oxidoreductase activity (GO:0016491),Biological Process:oxidation-reduction process (GO:0055114)	(S)-2-hydroxy-acid oxidase	1.1.3.15	ko00630 Glyoxylate and dicarboxylate metabolism ko01100 Metabolic pathways ko01110 Biosynthesis of secondary metabolites ko01200 Carbon metabolism ko04146 Peroxisome	FMN-dependent dehydrogenase, includes L-lactate dehydrogenase and type II isopentenyl diphosphate isomerase	CIR	Energy production and conversion ; Lipid transport and metabolism ; General function prediction only ;
TRINITY_DN192795_c0_g1	Y5520_ARATH, RecName: Full=Uncharacterized aarF domain-containing protein kinase At5g05200, chloroplastic EC=2.7.-.- Flags: Precursor	-	1401.2	1403.6	1520.1	1415.2	1345.9	1296.7	1.06582	0.164294	0.091969	Nonsignificant	None	--	--	aarF domain-containing kinase	--	--	Predicted unusual protein kinase regulating ubiquinone biosynthesis, AarF/ABC1/UbiB family	HT	Coenzyme transport and metabolism ; Signal transduction mechanisms ;
TRINITY_DN315511_c0_g1	CB4A_ARATH, RecName: Full=Chlorophyll a-b binding protein CP29.1, chloroplastic AltName: Full=LHCB4.1 AltName: Full=LHCII protein 4.1 Flags: Precursor	-	1290.7	1318.6	1356.5	1424.2	1286.5	1318.5	0.984265	0.67769	-0.0228815	Nonsignificant	None	1	Cellular Component:membrane (GO:0016020)	light-harvesting complex II chlorophyll a/b binding protein 4	--	ko00196 Photosynthesis - antenna proteins ko01100 Metabolic pathways	--	--	--
TRINITY_DN201975_c2_g2	THIC_ARATH, RecName: Full=Phosphomethylpyrimidine synthase, chloroplastic EC=4.1.99.17 AltName: Full=Hydroxymethylpyrimidine phosphate synthase Short=HMP-P synthase Short=HMP-phosphate synthase Short=HMPP synthase AltName: Full=Protein PYRIMIDINE REQUIRING AltName: Full=Thiamine biosynthesis protein ThiC Short=Protein THIAMINE C Flags: Precursor	-	928.9	914.1	858.9	878.7	884.4	962.9	0.991159	0.828026	-0.0128113	Nonsignificant	None	2	Biological Process:thiamine biosynthetic process (GO:0009228),Molecular Function:iron-sulfur cluster binding (GO:0051536)	phosphomethylpyrimidine synthase	4.1.99.17	ko00730 Thiamine metabolism ko01100 Metabolic pathways	Thiamine biosynthesis protein ThiC	H	Coenzyme transport and metabolism ;
TRINITY_DN184078_c0_g1	PRS4_ORYSJ, RecName: Full=26S proteasome regulatory subunit 4 homolog AltName: Full=Tat-binding protein homolog 2	-	949.1	910.1	897.6	914.8	878.4	854.6	1.04117	0.196265	0.0582005	Nonsignificant	None	1	Molecular Function:ATP binding (GO:0005524)	26S proteasome regulatory subunit T2	--	ko03050 Proteasome	ATP-dependent 26S proteasome regulatory subunit	O	Posttranslational modification, protein turnover, chaperones ;
TRINITY_DN199494_c2_g4	CD48E_ARATH, RecName: Full=Cell division control protein 48 homolog E Short=AtCDC48e AltName: Full=Transitional endoplasmic reticulum ATPase E	-	256.9	245.9	245.4	242.6	260.6	244.5	1.00067	0.981881	0.000964433	Nonsignificant	None	1	Molecular Function:ATP binding (GO:0005524)	transitional endoplasmic reticulum ATPase	--	ko04141 Protein processing in endoplasmic reticulum	ATP-dependent 26S proteasome regulatory subunit	O	Posttranslational modification, protein turnover, chaperones ;
TRINITY_DN179890_c0_g1	GGT2_ARATH, RecName: Full=Glutamate--glyoxylate aminotransferase 2 Short=AtGGT2 EC=2.6.1.4 AltName: Full=Alanine aminotransferase GGT2 EC=2.6.1.2 AltName: Full=Alanine--glyoxylate aminotransferase GGT2 EC=2.6.1.44 AltName: Full=Alanine-2-oxoglutarate aminotransferase 2 EC=2.6.1.-	-	792.5	842.6	816.1	856.4	1031.1	838	0.899358	0.273148	-0.153033	Nonsignificant	None	2	Biological Process:biosynthetic process (GO:0009058),Molecular Function:pyridoxal phosphate binding (GO:0030170)	--	--	ko00220 Arginine biosynthesis ko00250 Alanine, aspartate and glutamate metabolism ko00260 Glycine, serine and threonine metabolism ko00630 Glyoxylate and dicarboxylate metabolism ko00710 Carbon fixation in photosynthetic organisms ko01100 Metabolic pathways ko01110 Biosynthesis of secondary metabolites ko01200 Carbon metabolism ko01210 2-Oxocarboxylic acid metabolism ko01230 Biosynthesis of amino…	Aspartate/methionine/tyrosine aminotransferase	E	Amino acid transport and metabolism ;
TRINITY_DN201864_c1_g1	XYLA_HORVU, RecName: Full=Xylose isomerase EC=5.3.1.5	-	858.9	806.6	815.7	817.8	839.6	726.9	1.04064	0.462106	0.0574723	Nonsignificant	None	2	Biological Process:carbohydrate metabolic process (GO:0005975),Molecular Function:xylose isomerase activity (GO:0009045)	xylose isomerase	5.3.1.5	ko00040 Pentose and glucuronate interconversions ko00051 Fructose and mannose metabolism ko01100 Metabolic pathways	Xylose isomerase	G	Carbohydrate transport and metabolism ;
TRINITY_DN185749_c0_g1	PSA6_ORYSJ, RecName: Full=Proteasome subunit alpha type-6 EC=3.4.25.1 AltName: Full=20S proteasome alpha subunit A AltName: Full=20S proteasome subunit alpha-1	-	1363.8	1401.6	1415.2	1484.4	1489.2	1396.5	0.956637	0.15944	-0.0639563	Nonsignificant	None	5	Molecular Function:endopeptidase activity (GO:0004175),Molecular Function:threonine-type endopeptidase activity (GO:0004298),Cellular Component:proteasome core complex (GO:0005839),Biological Process:ubiquitin-dependent protein catabolic process (GO:0006511),Biological Process:proteolysis involved in cellular protein catabolic process (GO:0051603)	20S proteasome subunit alpha 1	3.4.25.1	ko03050 Proteasome	20S proteasome, alpha and beta subunits	O	Posttranslational modification, protein turnover, chaperones ;
TRINITY_DN184932_c0_g1	OTC_PEA, RecName: Full=Ornithine carbamoyltransferase, chloroplastic EC=2.1.3.3 AltName: Full=Ornithine transcarbamylase Short=OTCase Flags: Precursor	-	737	722.8	680.2	724.6	688.2	734.6	0.996554	0.916825	-0.00498015	Nonsignificant	None	3	Biological Process:cellular amino acid metabolic process (GO:0006520),Molecular Function:amino acid binding (GO:0016597),Molecular Function:carboxyl- or carbamoyltransferase activity (GO:0016743)	ornithine carbamoyltransferase	2.1.3.3	ko00220 Arginine biosynthesis ko01100 Metabolic pathways ko01110 Biosynthesis of secondary metabolites ko01230 Biosynthesis of amino acids	Ornithine carbamoyltransferase	E	Amino acid transport and metabolism ;
TRINITY_DN185215_c0_g3	LOX23_HORVU, RecName: Full=Lipoxygenase 2.3, chloroplastic EC=1.13.11.12 AltName: Full=LOX2:Hv:3 Flags: Precursor	-	647	1084.4	807.9	903.5	776.9	859.8	0.999646	0.998379	-0.000511241	Nonsignificant	None	4	Molecular Function:protein binding (GO:0005515),Molecular Function:oxidoreductase activity (GO:0016491),Molecular Function:metal ion binding (GO:0046872),Biological Process:oxidation-reduction process (GO:0055114)	lipoxygenase	1.13.11.12	ko00591 Linoleic acid metabolism ko00592 alpha-Linolenic acid metabolism ko01100 Metabolic pathways ko01110 Biosynthesis of secondary metabolites	--	--	--
TRINITY_DN187131_c0_g2	ISPD_ORYSJ, RecName: Full=2-C-methyl-D-erythritol 4-phosphate cytidylyltransferase, chloroplastic EC=2.7.7.60 AltName: Full=4-diphosphocytidyl-2C-methyl-D-erythritol synthase Short=OsCMS AltName: Full=MEP cytidylyltransferase Flags: Precursor	-	1179.4	1270.9	1222.9	1096.8	1153.9	1126.7	1.08758	0.0434579	0.121124	Nonsignificant	None	2	Biological Process:isoprenoid biosynthetic process (GO:0008299),Molecular Function:2-C-methyl-D-erythritol 4-phosphate cytidylyltransferase activity (GO:0050518)	2-C-methyl-D-erythritol 4-phosphate cytidylyltransferase	2.7.7.60	ko00900 Terpenoid backbone biosynthesis ko01100 Metabolic pathways ko01110 Biosynthesis of secondary metabolites	2-C-methyl-D-erythritol 4-phosphate cytidylyltransferase	I	Lipid transport and metabolism ;
TRINITY_DN182381_c7_g1	1433A_HORVU, RecName: Full=14-3-3-like protein A Short=14-3-3A	-	481.6	456.7	488.5	495.6	443.5	436.6	1.03714	0.476214	0.0526172	Nonsignificant	None	1	Molecular Function:protein domain specific binding (GO:0019904)	14-3-3 protein epsilon	--		--	--	--
TRINITY_DN194055_c1_g1	SYGM1_ARATH, RecName: Full=Glycine--tRNA ligase, mitochondrial 1 {ECO:0000305} EC=6.1.1.14 {ECO:0000269|PubMed:11278923} AltName: Full=Diadenosine tetraphosphate synthetase {ECO:0000305} Short=AP-4-A synthetase {ECO:0000305} AltName: Full=Glycyl-tRNA synthetase 1 {ECO:0000303|PubMed:11278923} Short=GlyRS-1 {ECO:0000303|PubMed:11278923} Flags: Precursor	-	695	666.6	681.5	669.8	705.3	713.2	0.978356	0.400805	-0.0315692	Nonsignificant	None	7	Molecular Function:nucleotide binding (GO:0000166),Molecular Function:aminoacyl-tRNA ligase activity (GO:0004812),Molecular Function:glycine-tRNA ligase activity (GO:0004820),Molecular Function:ATP binding (GO:0005524),Cellular Component:cytoplasm (GO:0005737),Biological Process:tRNA aminoacylation for protein translation (GO:0006418),Biological Process:glycyl-tRNA aminoacylation (GO:0006426)	glycyl-tRNA synthetase	6.1.1.14	ko00970 Aminoacyl-tRNA biosynthesis	Glycyl-tRNA synthetase (class II)	J	Translation, ribosomal structure and biogenesis ;
TRINITY_DN197104_c0_g2	DHQS_ACTCH, RecName: Full=3-dehydroquinate synthase, chloroplastic EC=4.2.3.4 Flags: Precursor	-	1541.7	1453.3	1594.8	1479.7	1513	1603.4	0.998629	0.971598	-0.0019789	Nonsignificant	None	--	--	3-dehydroquinate synthase	4.2.3.4	ko00400 Phenylalanine, tyrosine and tryptophan biosynthesis ko01100 Metabolic pathways ko01110 Biosynthesis of secondary metabolites ko01230 Biosynthesis of amino acids	3-dehydroquinate synthetase	E	Amino acid transport and metabolism ;
TRINITY_DN183127_c0_g1	HS906_ARATH, RecName: Full=Heat shock protein 90-6, mitochondrial {ECO:0000305} Short=AtHSP90.6 {ECO:0000305} Short=AtHsp90-6 {ECO:0000303|PubMed:11599565} AltName: Full=Heat shock protein 89-1 {ECO:0000305} Short=Hsp89-1 {ECO:0000303|PubMed:11599565} Flags: Precursor	-	1349.1	1253	1351.6	1304	1298.9	1311.8	1.00996	0.728291	0.0143017	Nonsignificant	None	4	Molecular Function:ATP binding (GO:0005524),Biological Process:protein folding (GO:0006457),Biological Process:response to stress (GO:0006950),Molecular Function:unfolded protein binding (GO:0051082)	heat shock protein 90kDa beta	--	ko04141 Protein processing in endoplasmic reticulum ko04626 Plant-pathogen interaction	Molecular chaperone, HSP90 family	O	Posttranslational modification, protein turnover, chaperones ;
TRINITY_DN198446_c1_g1	PATL5_ARATH, RecName: Full=Patellin-5	-	771.2	689.5	702.2	764.5	779	772.8	0.933774	0.178567	-0.0988552	Nonsignificant	None	2	Biological Process:transport (GO:0006810),Cellular Component:integral component of membrane (GO:0016021)	--	--	--	--	--	--
TRINITY_DN161963_c1_g1	CLH1_ORYSJ, RecName: Full=Clathrin heavy chain 1	-	443	428.9	424.9	404	394.6	386.8	1.09398	0.00760993	0.129582	Nonsignificant	None	5	Molecular Function:structural molecule activity (GO:0005198),Biological Process:intracellular protein transport (GO:0006886),Biological Process:vesicle-mediated transport (GO:0016192),Cellular Component:clathrin coat of trans-Golgi network vesicle (GO:0030130),Cellular Component:clathrin coat of coated pit (GO:0030132)	clathrin heavy chain	--	ko04144 Endocytosis	--	--	--
TRINITY_DN195394_c1_g2	IMA1B_ORYSJ, RecName: Full=Importin subunit alpha-1b	-	891.7	874.3	902.7	921.2	910	867.6	0.988847	0.62207	-0.0161809	Nonsignificant	None	1	Molecular Function:protein binding (GO:0005515)	--	--	--	--	--	--
TRINITY_DN193339_c1_g4	CP41B_ARATH, RecName: Full=Chloroplast stem-loop binding protein of 41 kDa b, chloroplastic Short=CSP41-b AltName: Full=Heteroglycan-interacting protein 1.3 AltName: Full=Protein CHLOROPLAST RNA BINDING AltName: Full=Protein Gb5f Flags: Precursor	-	2369.9	2577.3	2315.8	2395.9	2543.7	2780.9	0.940742	0.335974	-0.0881287	Nonsignificant	None	--	--	--	--	--	Nucleoside-diphosphate-sugar epimerase	M	Cell wall/membrane/envelope biogenesis ;
TRINITY_DN195658_c1_g2	AGAL_ORYSJ, RecName: Full=Alpha-galactosidase EC=3.2.1.22 AltName: Full=Alpha-D-galactoside galactohydrolase AltName: Full=Melibiase Flags: Precursor	-	1088.8	1045.6	1040.4	957.7	962.2	1038.6	1.07311	0.092354	0.1018	Nonsignificant	None	1	Biological Process:carbohydrate metabolic process (GO:0005975)	alpha-galactosidase	3.2.1.22	ko00052 Galactose metabolism ko00561 Glycerolipid metabolism ko00600 Sphingolipid metabolism ko00603 Glycosphingolipid biosynthesis - globo and isoglobo series	Alpha-galactosidase	G	Carbohydrate transport and metabolism ;
TRINITY_DN199609_c0_g1	SVR3_ARATH, RecName: Full=Putative elongation factor TypA-like SVR3, chloroplastic AltName: Full=Protein HAPPY ON NORFLURAZON 23 {ECO:0000303|PubMed:21208309} AltName: Full=Protein SUPPRESSOR OF VARIEGATION 3 {ECO:0000303|PubMed:21187014} Flags: Precursor	-	1024.6	1001.1	1011.6	1078.7	1127.7	1108.7	0.916202	0.0112628	-0.126263	Nonsignificant	None	2	Molecular Function:GTPase activity (GO:0003924),Molecular Function:GTP binding (GO:0005525)	GTP-binding protein	--	--	Predicted membrane GTPase involved in stress response	T	Signal transduction mechanisms ;
TRINITY_DN166855_c2_g2	CLH2_ORYSJ, RecName: Full=Clathrin heavy chain 2	-	141.4	138.4	143.9	144.6	125.7	131.6	1.05424	0.321931	0.0762066	Nonsignificant	None	2	Biological Process:intracellular protein transport (GO:0006886),Biological Process:vesicle-mediated transport (GO:0016192)	clathrin heavy chain	--	ko04144 Endocytosis	--	--	--
TRINITY_DN201850_c0_g2	RK15_PEA, RecName: Full=50S ribosomal protein L15, chloroplastic AltName: Full=CL15 Flags: Precursor Fragment	-	16.2	16	17.6	16.7	18	16.2	0.978389	0.644425	-0.0315199	Nonsignificant	None	3	Molecular Function:structural constituent of ribosome (GO:0003735),Biological Process:translation (GO:0006412),Cellular Component:large ribosomal subunit (GO:0015934)	large subunit ribosomal protein L15	--	ko03010 Ribosome	Ribosomal protein L15	J	Translation, ribosomal structure and biogenesis ;
TRINITY_DN192820_c0_g1	CH62_MAIZE, RecName: Full=Chaperonin CPN60-2, mitochondrial AltName: Full=HSP60-2 Flags: Precursor	-	91.5	82.7	71	63.6	73.2	79.6	1.13309	0.275635	0.180258	Nonsignificant	None	1	Molecular Function:ATP binding (GO:0005524)	chaperonin GroEL	--	ko03018 RNA degradation	Chaperonin GroEL (HSP60 family)	O	Posttranslational modification, protein turnover, chaperones ;
TRINITY_DN179287_c1_g5	GBLPA_ORYSJ, RecName: Full=Guanine nucleotide-binding protein subunit beta-like protein A Short=GPB-LR AltName: Full=RWD AltName: Full=Receptor for activated C kinase 1A	-	1293.6	1286.6	1280.5	1303.5	1264.2	1312.9	0.994872	0.704157	-0.00741728	Nonsignificant	None	1	Molecular Function:protein binding (GO:0005515)	guanine nucleotide-binding protein subunit beta-2-like 1 protein	--		Uncharacterized protein, contains caspase domain	R	General function prediction only ;
TRINITY_DN199030_c2_g1	ILV5_ORYSJ, RecName: Full=Ketol-acid reductoisomerase, chloroplastic EC=1.1.1.86 AltName: Full=Acetohydroxy-acid reductoisomerase AltName: Full=Alpha-keto-beta-hydroxylacyl reductoisomerase AltName: Full=Protein KARI Flags: Precursor	-	1043.9	1091.7	1025.3	1058	1035	1065	1.00092	0.967528	0.00132422	Nonsignificant	None	4	Molecular Function:ketol-acid reductoisomerase activity (GO:0004455),Biological Process:branched-chain amino acid biosynthetic process (GO:0009082),Molecular Function:oxidoreductase activity (GO:0016491),Biological Process:oxidation-reduction process (GO:0055114)	ketol-acid reductoisomerase	1.1.1.86	ko00290 Valine, leucine and isoleucine biosynthesis ko00770 Pantothenate and CoA biosynthesis ko01100 Metabolic pathways ko01110 Biosynthesis of secondary metabolites ko01210 2-Oxocarboxylic acid metabolism ko01230 Biosynthesis of amino acids	Ketol-acid reductoisomerase	EH	Amino acid transport and metabolism ; Coenzyme transport and metabolism ;
TRINITY_DN199800_c1_g1	GLYM2_FLAPR, RecName: Full=Serine hydroxymethyltransferase 2, mitochondrial Short=SHMT2 EC=2.1.2.1 AltName: Full=Glycine hydroxymethyltransferase 2 AltName: Full=Serine methylase 2 Flags: Precursor	-	598.7	651	608.2	596.4	551.4	723	0.993105	0.942534	-0.00998248	Nonsignificant	None	1	Molecular Function:transferase activity (GO:0016740)	glycine hydroxymethyltransferase	2.1.2.1	ko00260 Glycine, serine and threonine metabolism ko00460 Cyanoamino acid metabolism ko00630 Glyoxylate and dicarboxylate metabolism ko00670 One carbon pool by folate ko01100 Metabolic pathways ko01110 Biosynthesis of secondary metabolites ko01200 Carbon metabolism ko01230 Biosynthesis of amino acids	Glycine/serine hydroxymethyltransferase	E	Amino acid transport and metabolism ;
TRINITY_DN190242_c1_g1	PCKA_MAIZE, RecName: Full=Phosphoenolpyruvate carboxykinase (ATP) Short=PEP carboxykinase Short=PEPCK EC=4.1.1.49	-	914.9	914.9	821.5	930.1	902.5	874.3	0.97946	0.633633	-0.0299417	Nonsignificant	None	3	Molecular Function:phosphoenolpyruvate carboxykinase (ATP) activity (GO:0004612),Molecular Function:ATP binding (GO:0005524),Biological Process:gluconeogenesis (GO:0006094)	phosphoenolpyruvate carboxykinase (ATP)	4.1.1.49	ko00010 Glycolysis / Gluconeogenesis ko00020 Citrate cycle (TCA cycle) ko00620 Pyruvate metabolism ko00710 Carbon fixation in photosynthetic organisms ko01100 Metabolic pathways ko01110 Biosynthesis of secondary metabolites ko01200 Carbon metabolism	Phosphoenolpyruvate carboxykinase, ATP-dependent	C	Energy production and conversion ;
TRINITY_DN196375_c1_g1	MTHR1_MAIZE, RecName: Full=Methylenetetrahydrofolate reductase 1 EC=1.5.1.20 AltName: Full=ZmMTHFR1	-	935.8	837.3	838.3	827.4	869.2	976.7	0.976845	0.729028	-0.0337983	Nonsignificant	None	--	--	methylenetetrahydrofolate reductase (NADPH)	1.5.1.20	ko00670 One carbon pool by folate ko01100 Metabolic pathways ko01200 Carbon metabolism	--	--	--
TRINITY_DN195608_c0_g2	NAA15_ARATH, RecName: Full=N-terminal acetyltransferase A complex auxiliary subunit NAA15 {ECO:0000303|PubMed:25966763} Short=AtNAA15 {ECO:0000303|PubMed:25966763} AltName: Full=Protein OMISHA {ECO:0000303|PubMed:17915010}	-	1404.8	1287.9	1310.5	1311.3	1321.2	1325.7	1.01137	0.716771	0.0163092	Nonsignificant	None	1	Molecular Function:protein binding (GO:0005515)	N-alpha-acetyltransferase 15/16, NatA auxiliary subunit	--	--	Predicted methyltransferase, contains TPR repeat	R	General function prediction only ;
TRINITY_DN186324_c2_g2	E1311_ARATH, RecName: Full=Glucan endo-1,3-beta-glucosidase 11 EC=3.2.1.39 AltName: Full=(1->3)-beta-glucan endohydrolase 11 Short=(1->3)-beta-glucanase 11 AltName: Full=Beta-1,3-endoglucanase 11 Short=Beta-1,3-glucanase 11 Flags: Precursor	-	1110.1	991.8	1161.6	657.5	739.1	731.4	1.5336	0.00682317	0.616922	Significant	up	1	Biological Process:carbohydrate metabolic process (GO:0005975)	--	--	--	--	--	--
TRINITY_DN199289_c1_g1	AKR1_SOYBN, RecName: Full=Probable aldo-keto reductase 1 Short=GmAKR1 EC=1.1.1.-	-	1214.1	1227.1	1158.8	1295.2	1277.8	1152.4	0.966339	0.464798	-0.0493984	Nonsignificant	None	--	--	--	--	--	Predicted oxidoreductase (related to aryl-alcohol dehydrogenase)	R	General function prediction only ;
TRINITY_DN199180_c0_g1	CAPP1_SORBI, RecName: Full=Phosphoenolpyruvate carboxylase 1 Short=PEPC 1 Short=PEPCase 1 EC=4.1.1.31 AltName: Full=CP21	-	33.5	31.7	32.5	30.1	38.8	33.4	0.955034	0.609548	-0.0663757	Nonsignificant	None	3	Biological Process:tricarboxylic acid cycle (GO:0006099),Molecular Function:phosphoenolpyruvate carboxylase activity (GO:0008964),Biological Process:carbon fixation (GO:0015977)	phosphoenolpyruvate carboxylase	4.1.1.31	ko00620 Pyruvate metabolism ko00710 Carbon fixation in photosynthetic organisms ko01100 Metabolic pathways ko01200 Carbon metabolism	Phosphoenolpyruvate carboxylase	C	Energy production and conversion ;
TRINITY_DN176404_c4_g3	CB23_TOBAC, RecName: Full=Chlorophyll a-b binding protein 36, chloroplastic AltName: Full=LHCII type I CAB-36 Short=LHCP Flags: Precursor	-	7592.1	7736.9	7660.1	8289.9	8130.8	7187	0.973797	0.610839	-0.0383075	Nonsignificant	None	1	Cellular Component:membrane (GO:0016020)	light-harvesting complex II chlorophyll a/b binding protein 2	--	ko00196 Photosynthesis - antenna proteins ko01100 Metabolic pathways	--	--	--
TRINITY_DN192900_c0_g4	RD21A_ARATH, RecName: Full=Cysteine proteinase RD21A {ECO:0000305} EC=3.4.22.- {ECO:0000305} AltName: Full=Protein RESPONSIVE TO DEHYDRATION 21 {ECO:0000303|PubMed:8325504} Short=RD21 {ECO:0000303|PubMed:8325504} Flags: Precursor	-	1061.5	1212	1047.5	1093.3	1044.1	852.8	1.11063	0.295384	0.151376	Nonsignificant	None	2	Biological Process:proteolysis (GO:0006508),Molecular Function:cysteine-type peptidase activity (GO:0008234)	--	--	--	Cysteine protease, C1A family	O	Posttranslational modification, protein turnover, chaperones ;
TRINITY_DN170753_c0_g2	ALFC1_ORYSJ, RecName: Full=Fructose-bisphosphate aldolase 1, cytoplasmic {ECO:0000305} EC=4.1.2.13 {ECO:0000250|UniProtKB:Q9SJQ9} AltName: Full=Cytoplasmic aldolase {ECO:0000303|PubMed:2374721} Short=cALD {ECO:0000303|PubMed:2374721} AltName: Full=Gravity-specific protein GSC 233 {ECO:0000303|PubMed:1363521}	-	757.6	758	765.2	949.9	761.5	758.2	0.92355	0.425254	-0.114737	Nonsignificant	None	2	Molecular Function:fructose-bisphosphate aldolase activity (GO:0004332),Biological Process:glycolytic process (GO:0006096)	fructose-bisphosphate aldolase, class I	4.1.2.13	ko00010 Glycolysis / Gluconeogenesis ko00030 Pentose phosphate pathway ko00051 Fructose and mannose metabolism ko00710 Carbon fixation in photosynthetic organisms ko01100 Metabolic pathways ko01110 Biosynthesis of secondary metabolites ko01200 Carbon metabolism ko01230 Biosynthesis of amino acids	Fructose-bisphosphate aldolase class 1	G	Carbohydrate transport and metabolism ;
TRINITY_DN198891_c1_g2	CALX1_ARATH, RecName: Full=Calnexin homolog 1 Flags: Precursor	-	1375.2	1248.3	1284.6	1357.5	1408.4	1184	0.989417	0.868683	-0.0153487	Nonsignificant	None	4	Molecular Function:calcium ion binding (GO:0005509),Cellular Component:endoplasmic reticulum (GO:0005783),Biological Process:protein folding (GO:0006457),Molecular Function:unfolded protein binding (GO:0051082)	calnexin	--	ko04141 Protein processing in endoplasmic reticulum ko04145 Phagosome	--	--	--
TRINITY_DN200296_c1_g1	SYDC2_ARATH, RecName: Full=Aspartate--tRNA ligase 2, cytoplasmic {ECO:0000305} EC=6.1.1.12 {ECO:0000305} AltName: Full=Aspartyl-tRNA synthetase {ECO:0000305} Short=AspRS {ECO:0000305} AltName: Full=Protein IMPAIRED IN BABA-INDUCED DISEASE IMMUNITY 1 {ECO:0000303|PubMed:24776930}	-	1121.5	1073.4	1137.2	1100	1102.6	1025.2	1.03231	0.340133	0.0458805	Nonsignificant	None	4	Molecular Function:nucleotide binding (GO:0000166),Molecular Function:aminoacyl-tRNA ligase activity (GO:0004812),Molecular Function:ATP binding (GO:0005524),Biological Process:tRNA aminoacylation for protein translation (GO:0006418)				Aspartyl/asparaginyl-tRNA synthetase	J	Translation, ribosomal structure and biogenesis ;
TRINITY_DN181895_c0_g1	Y2766_ARATH, RecName: Full=Uncharacterized protein At2g37660, chloroplastic Flags: Precursor	-	1116.5	1039.8	934.7	997.9	959.4	1024.1	1.03676	0.568718	0.0520837	Nonsignificant	None	--	--	--	--	--	Uncharacterized conserved protein YbjT, contains NAD(P)-binding and DUF2867 domains	R	General function prediction only ;
TRINITY_DN164793_c0_g1	PSAD_CUCSA, RecName: Full=Photosystem I reaction center subunit II, chloroplastic AltName: Full=PS I subunit 5 AltName: Full=Photosystem I 20 kDa subunit Short=PSI-D Flags: Precursor	-	181.6	208.3	220.2	199.5	182.3	205.1	1.03953	0.598932	0.055931	Nonsignificant	None	3	Cellular Component:photosystem I (GO:0009522),Cellular Component:photosystem I reaction center (GO:0009538),Biological Process:photosynthesis (GO:0015979)	photosystem I subunit II	--	ko00195 Photosynthesis ko01100 Metabolic pathways	--	--	--
TRINITY_DN185399_c0_g1	DMS1D_WHEAT, RecName: Full=Deoxymugineic acid synthase 1-D {ECO:0000303|PubMed:28475636} EC=1.1.1.285 {ECO:0000250|UniProtKB:W5DYE3}	-	961.1	898.8	904.8	932.1	947.6	714	1.06593	0.532711	0.0921113	Nonsignificant	None	2	Molecular Function:oxidoreductase activity (GO:0016491),Biological Process:oxidation-reduction process (GO:0055114)				Aldo/keto reductase, related to diketogulonate reductase	Q	Secondary metabolites biosynthesis, transport and catabolism ;
TRINITY_DN187101_c1_g2	MPCP3_ARATH, RecName: Full=Mitochondrial phosphate carrier protein 3, mitochondrial AltName: Full=Mitochondrial phosphate transporter 3 Short=MPT3 AltName: Full=Phosphate transporter 31 Flags: Precursor	-	1622.8	1628.1	1656.9	1678.5	1679.6	1523.2	1.00543	0.881952	0.00781104	Nonsignificant	None	--	--	solute carrier family 25 (mitochondrial phosphate transporter), member 3	--	--	--	--	--
TRINITY_DN196943_c0_g1	PTC52_ARATH, RecName: Full=Protochlorophyllide-dependent translocon component 52, chloroplastic AltName: Full=ACD1-like protein AltName: Full=Protein TIC 55-IV AltName: Full=Translocon at the inner envelope membrane of chloroplasts 55-IV Flags: Precursor	-	1232	1225.3	1176	1062.5	1227.4	1244.9	1.02787	0.635373	0.0396519	Nonsignificant	None	3	Molecular Function:chlorophyllide a oxygenase [overall] activity (GO:0010277),Molecular Function:oxidoreductase activity (GO:0016491),Biological Process:oxidation-reduction process (GO:0055114)	--	--	--	Phenylpropionate dioxygenase or related ring-hydroxylating dioxygenase, large terminal subunit	PR	Inorganic ion transport and metabolism ; General function prediction only ;
TRINITY_DN194865_c1_g1	IPYR_ORYSJ, RecName: Full=Soluble inorganic pyrophosphatase EC=3.6.1.1 AltName: Full=Pyrophosphate phospho-hydrolase Short=PPase	-	1249.5	1569.9	1329.3	1389.7	1552.9	1354.6	0.965443	0.690449	-0.0507376	Nonsignificant	None	4	Molecular Function:magnesium ion binding (GO:0000287),Molecular Function:inorganic diphosphatase activity (GO:0004427),Cellular Component:cytoplasm (GO:0005737),Biological Process:phosphate-containing compound metabolic process (GO:0006796)	inorganic pyrophosphatase	3.6.1.1	ko00190 Oxidative phosphorylation	Inorganic pyrophosphatase	CP	Energy production and conversion ; Inorganic ion transport and metabolism ;
TRINITY_DN199157_c0_g1	SERA1_ARATH, RecName: Full=D-3-phosphoglycerate dehydrogenase 1, chloroplastic EC=1.1.1.95 {ECO:0000269|PubMed:24368794} AltName: Full=Protein EMBRYO SAC DEVELOPMENT ARREST 9 Flags: Precursor	-	989	1052.8	1062.5	985.1	949.1	889.9	1.09922	0.0627923	0.136477	Nonsignificant	None	4	Biological Process:metabolic process (GO:0008152),Molecular Function:amino acid binding (GO:0016597),Molecular Function:NAD binding (GO:0051287),Biological Process:oxidation-reduction process (GO:0055114)	--	--	ko00260 Glycine, serine and threonine metabolism ko01100 Metabolic pathways ko01200 Carbon metabolism ko01230 Biosynthesis of amino acids	Lactate dehydrogenase or related 2-hydroxyacid dehydrogenase	CHR	Energy production and conversion ; Coenzyme transport and metabolism ; General function prediction only ;
TRINITY_DN195557_c0_g1	NTRC_ORYSJ, RecName: Full=Thioredoxin reductase NTRC EC=1.8.1.9 AltName: Full=NADPH-dependent thioredoxin reductase C Short=OsNTRC Flags: Precursor	-	1397.1	1341.3	1380.8	1301.6	1337.3	1378.9	1.02524	0.296209	0.0359584	Nonsignificant	None	2	Molecular Function:oxidoreductase activity (GO:0016491),Biological Process:oxidation-reduction process (GO:0055114)	thioredoxin reductase (NADPH)	1.8.1.9	ko00450 Selenocompound metabolism	Negative regulator of GroEL, contains thioredoxin-like and TPR-like domains	O	Posttranslational modification, protein turnover, chaperones ;
TRINITY_DN197084_c0_g1	GSHRC_ORYSJ, RecName: Full=Glutathione reductase, cytosolic Short=GR Short=GRase EC=1.8.1.7	-	1068.4	1009.3	1032.4	1049	1002.9	964.9	1.03093	0.361333	0.0439419	Nonsignificant	None	2	Molecular Function:oxidoreductase activity (GO:0016491),Biological Process:oxidation-reduction process (GO:0055114)	glutathione reductase (NADPH)	1.8.1.7	ko00480 Glutathione metabolism	Pyruvate/2-oxoglutarate dehydrogenase complex, dihydrolipoamide dehydrogenase (E3) component or related enzyme	C	Energy production and conversion ;
TRINITY_DN193208_c0_g1	ICDHP_ARATH, RecName: Full=Isocitrate dehydrogenase [NADP], chloroplastic/mitochondrial EC=1.1.1.42 Flags: Precursor	-	629.3	629.1	630.2	667	648.7	617.5	0.976929	0.411721	-0.0336737	Nonsignificant	None	3	Molecular Function:isocitrate dehydrogenase (NADP+) activity (GO:0004450),Biological Process:isocitrate metabolic process (GO:0006102),Biological Process:oxidation-reduction process (GO:0055114)	isocitrate dehydrogenase	1.1.1.42	ko00020 Citrate cycle (TCA cycle) ko00480 Glutathione metabolism ko01100 Metabolic pathways ko01110 Biosynthesis of secondary metabolites ko01200 Carbon metabolism ko01210 2-Oxocarboxylic acid metabolism ko01230 Biosynthesis of amino acids ko04146 Peroxisome	Isocitrate dehydrogenase	C	Energy production and conversion ;
TRINITY_DN196271_c0_g1	ASPRX_ORYSJ, RecName: Full=Aspartic proteinase EC=3.4.23.- Flags: Precursor	-	666	715.4	705.2	682.1	730.7	550	1.06307	0.529122	0.0882409	Nonsignificant	None	3	Molecular Function:aspartic-type endopeptidase activity (GO:0004190),Biological Process:proteolysis (GO:0006508),Biological Process:lipid metabolic process (GO:0006629)	phytepsin	3.4.23.40	--	--	--	--
TRINITY_DN196413_c1_g1	IMA1B_ORYSJ, RecName: Full=Importin subunit alpha-1b	-	139	120.3	119.1	125.9	124.3	123.1	1.01366	0.817303	0.0195766	Nonsignificant	None	1	Molecular Function:protein binding (GO:0005515)	--	--	--	--	--	--
TRINITY_DN187843_c0_g3	RS8_MAIZE, RecName: Full=40S ribosomal protein S8	-	1549.9	1468.3	1463.2	1408.3	1539.8	1435.3	1.02236	0.54512	0.0318992	Nonsignificant	None	4	Molecular Function:structural constituent of ribosome (GO:0003735),Cellular Component:intracellular (GO:0005622),Cellular Component:ribosome (GO:0005840),Biological Process:translation (GO:0006412)	small subunit ribosomal protein S8e	--	ko03010 Ribosome	Ribosomal protein S8E	J	Translation, ribosomal structure and biogenesis ;
TRINITY_DN187126_c1_g1	BXL7_ARATH, RecName: Full=Probable beta-D-xylosidase 7 Short=AtBXL7 EC=3.2.1.- Flags: Precursor	-	951.9	897.9	942.4	831.3	943.3	942.5	1.02764	0.585794	0.0393346	Nonsignificant	None	1	Biological Process:carbohydrate metabolic process (GO:0005975)	--	--	--	Periplasmic beta-glucosidase and related glycosidases	G	Carbohydrate transport and metabolism ;
TRINITY_DN179703_c2_g1	PCKA_MAIZE, RecName: Full=Phosphoenolpyruvate carboxykinase (ATP) Short=PEP carboxykinase Short=PEPCK EC=4.1.1.49	-	85.3	81.5	79.2	82.1	87.4	80.3	0.984788	0.672539	-0.0221152	Nonsignificant	None	3	Molecular Function:phosphoenolpyruvate carboxykinase (ATP) activity (GO:0004612),Molecular Function:ATP binding (GO:0005524),Biological Process:gluconeogenesis (GO:0006094)	phosphoenolpyruvate carboxykinase (ATP)	4.1.1.49	ko00010 Glycolysis / Gluconeogenesis ko00020 Citrate cycle (TCA cycle) ko00620 Pyruvate metabolism ko00710 Carbon fixation in photosynthetic organisms ko01100 Metabolic pathways ko01110 Biosynthesis of secondary metabolites ko01200 Carbon metabolism	Phosphoenolpyruvate carboxykinase, ATP-dependent	C	Energy production and conversion ;
TRINITY_DN200462_c1_g2	S130B_ARATH, RecName: Full=Spliceosome-associated protein 130 B {ECO:0000303|PubMed:21680607} Short=AtSAP130b {ECO:0000303|PubMed:21680607} Short=SAP 130 B {ECO:0000303|PubMed:21680607} AltName: Full=Pre-mRNA-splicing factor SF3b 130 kDa subunit B {ECO:0000303|PubMed:15987817} Short=SF3b130 B {ECO:0000303|PubMed:15987817}	-	1225.5	1185.4	1153.9	1119.8	1185.6	1110.4	1.04362	0.190616	0.0615976	Nonsignificant	None	2	Molecular Function:nucleic acid binding (GO:0003676),Cellular Component:nucleus (GO:0005634)	splicing factor 3B subunit 3	--	ko03040 Spliceosome	--	--	--
TRINITY_DN179035_c1_g2	RBS2_ORYSJ, RecName: Full=Ribulose bisphosphate carboxylase small chain A, chloroplastic Short=RuBisCO small subunit A EC=4.1.1.39 Flags: Precursor	-	204.8	226.7	225.5	196	209.8	267.6	0.975646	0.831201	-0.0355704	Nonsignificant	None	--	--	ribulose-bisphosphate carboxylase small chain	4.1.1.39	ko00630 Glyoxylate and dicarboxylate metabolism ko00710 Carbon fixation in photosynthetic organisms ko01100 Metabolic pathways ko01200 Carbon metabolism	Ribulose bisphosphate carboxylase small subunit	G	Carbohydrate transport and metabolism ;
TRINITY_DN192519_c2_g2	CH20_ARATH, RecName: Full=20 kDa chaperonin, chloroplastic AltName: Full=Chaperonin 10 Short=Ch-CPN10 Short=Cpn10 AltName: Full=Chaperonin 20 AltName: Full=Protein Cpn21 Flags: Precursor	-	297.7	295.2	280.4	337.1	350.9	386.1	0.813053	0.0321587	-0.298579	Significant	down	4	Cellular Component:cytoplasm (GO:0005737),Biological Process:protein folding (GO:0006457),Molecular Function:transition metal ion binding (GO:0046914),Biological Process:positive regulation of superoxide dismutase activity (GO:1901671)	chaperonin GroES	--	--	Co-chaperonin GroES (HSP10)	O	Posttranslational modification, protein turnover, chaperones ;
TRINITY_DN184932_c0_g2	OTC_PEA, RecName: Full=Ornithine carbamoyltransferase, chloroplastic EC=2.1.3.3 AltName: Full=Ornithine transcarbamylase Short=OTCase Flags: Precursor	-	57.3	68.7	70.8	62.4	63.5	78.9	0.960938	0.715164	-0.0574855	Nonsignificant	None	3	Biological Process:cellular amino acid metabolic process (GO:0006520),Molecular Function:amino acid binding (GO:0016597),Molecular Function:carboxyl- or carbamoyltransferase activity (GO:0016743)	ornithine carbamoyltransferase	2.1.3.3	ko00220 Arginine biosynthesis ko01100 Metabolic pathways ko01110 Biosynthesis of secondary metabolites ko01230 Biosynthesis of amino acids	Ornithine carbamoyltransferase	E	Amino acid transport and metabolism ;
TRINITY_DN194728_c0_g2	RPN2_ORYSJ, RecName: Full=Dolichyl-diphosphooligosaccharide--protein glycosyltransferase subunit 2 EC=2.4.99.18 AltName: Full=Ribophorin II Short=RPN-II AltName: Full=Ribophorin-2 Flags: Precursor	-	1188.6	1159.5	1122.4	1115.5	1204.5	1155.8	0.998475	0.958927	-0.00220154	Nonsignificant	None	3	Biological Process:protein N-linked glycosylation (GO:0006487),Cellular Component:oligosaccharyltransferase complex (GO:0008250),Cellular Component:integral component of membrane (GO:0016021)	oligosaccharyltransferase complex subunit delta (ribophorin II)	--	ko00510 N-Glycan biosynthesis ko01100 Metabolic pathways ko04141 Protein processing in endoplasmic reticulum	--	--	--
TRINITY_DN195679_c1_g1	IMA1A_ORYSJ, RecName: Full=Importin subunit alpha-1a	-	626.8	648.3	662.8	677	696	655.9	0.955148	0.124549	-0.0662036	Nonsignificant	None	5	Molecular Function:protein binding (GO:0005515),Cellular Component:nucleus (GO:0005634),Cellular Component:cytoplasm (GO:0005737),Biological Process:protein import into nucleus (GO:0006606),Molecular Function:protein transporter activity (GO:0008565)	--	--	--	--	--	--
TRINITY_DN186676_c1_g1	RSSA_VITVI, RecName: Full=40S ribosomal protein SA {ECO:0000255|HAMAP-Rule:MF_03015}	-	1095.7	1088.5	1053.1	1093.1	1149.2	987.8	1.00223	0.964927	0.00321224	Nonsignificant	None	5	Molecular Function:structural constituent of ribosome (GO:0003735),Cellular Component:intracellular (GO:0005622),Cellular Component:ribosome (GO:0005840),Biological Process:translation (GO:0006412),Cellular Component:small ribosomal subunit (GO:0015935)	small subunit ribosomal protein SAe	--	ko03010 Ribosome	Ribosomal protein S2	J	Translation, ribosomal structure and biogenesis ;
TRINITY_DN200844_c2_g1	BIG5_ARATH, RecName: Full=Brefeldin A-inhibited guanine nucleotide-exchange protein 5 Short=BIG5 AltName: Full=ARF guanine-nucleotide exchange factor BIG5 AltName: Full=Protein BFA-VISUALIZED ENDOCYTIC TRAFFICKING DEFECTIVE 1 Short=Protein BEN1 AltName: Full=Protein HOPM INTERACTOR 7	-	1253.6	1124	1164.5	1177.2	1158.3	1157.2	1.01414	0.710749	0.0202622	Nonsignificant	None	2	Molecular Function:ARF guanyl-nucleotide exchange factor activity (GO:0005086),Biological Process:regulation of ARF protein signal transduction (GO:0032012)	guanine nucleotide-exchange factor	--	--	Guanine-nucleotide exchange factor, contains Sec7 domain	R	General function prediction only ;
TRINITY_DN201884_c2_g1	MTBC1_VITVI, RecName: Full=Probable bifunctional methylthioribulose-1-phosphate dehydratase/enolase-phosphatase E1 1 {ECO:0000255|HAMAP-Rule:MF_03118} Includes: RecName: Full=Methylthioribulose-1-phosphate dehydratase {ECO:0000255|HAMAP-Rule:MF_03118} Short=MTRu-1-P dehydratase {ECO:0000255|HAMAP-Rule:MF_03118} EC=4.2.1.109 {ECO:0000255|HAMAP-Rule:MF_03118} Includes: RecName: Full=Enolase-phospha…	-	1027.2	1166.4	1311.5	1057.7	1123.4	1065.4	1.07966	0.405183	0.11057	Nonsignificant	None	--	--	--	--	--	Enolase-phosphatase E1 involved in merthionine salvage	E	Amino acid transport and metabolism ;
TRINITY_DN177341_c3_g2	RS173_ARATH, RecName: Full=40S ribosomal protein S17-3	-	1192	1080	1121.1	1140.8	1197.3	1097.6	0.987601	0.761363	-0.0180001	Nonsignificant	None	4	Molecular Function:structural constituent of ribosome (GO:0003735),Cellular Component:intracellular (GO:0005622),Cellular Component:ribosome (GO:0005840),Biological Process:translation (GO:0006412)	small subunit ribosomal protein S17e	--	ko03010 Ribosome	Ribosomal protein S17E	J	Translation, ribosomal structure and biogenesis ;
TRINITY_DN180806_c3_g8	MO3_ARATH, RecName: Full=Monooxygenase 3 {ECO:0000303|PubMed:10216258} Short=AtMO3 {ECO:0000303|PubMed:10216258} EC=1.14.13.-	-	821.9	733.6	699.3	736	736.5	794.5	0.994618	0.927786	-0.00778492	Nonsignificant	None	1	Molecular Function:FAD binding (GO:0071949)	--	--	--	2-polyprenyl-6-methoxyphenol hydroxylase and related FAD-dependent oxidoreductases	HC	Coenzyme transport and metabolism ; Energy production and conversion ;
TRINITY_DN183921_c0_g1	E13B_HORVU, RecName: Full=Glucan endo-1,3-beta-glucosidase GII EC=3.2.1.39 {ECO:0000269|PubMed:8514770} AltName: Full=(1->3)-beta-glucan endohydrolase GII AltName: Full=(1->3)-beta-glucanase isoenzyme GII AltName: Full=Beta-1,3-endoglucanase GII Flags: Precursor	-	710.2	573.7	596.7	401.6	474.4	405.5	1.4675	0.0235335	0.55336	Significant	up	1	Biological Process:carbohydrate metabolic process (GO:0005975)	--	--	--	--	--	--
TRINITY_DN200860_c5_g4	PAL2_ORYSI, RecName: Full=Phenylalanine ammonia-lyase EC=4.3.1.24	-	934	495.8	555.9	555.1	811.7	747.2	0.939309	0.802601	-0.0903277	Nonsignificant	None	--	--	phenylalanine ammonia-lyase	4.3.1.24	ko00360 Phenylalanine metabolism ko00940 Phenylpropanoid biosynthesis ko01100 Metabolic pathways ko01110 Biosynthesis of secondary metabolites	Histidine ammonia-lyase	E	Amino acid transport and metabolism ;
TRINITY_DN183425_c0_g4	PSBP_WHEAT, RecName: Full=Oxygen-evolving enhancer protein 2, chloroplastic Short=OEE2 AltName: Full=23 kDa subunit of oxygen evolving system of photosystem II AltName: Full=23 kDa thylakoid membrane protein AltName: Full=OEC 23 kDa subunit Flags: Precursor	-	563.8	491.8	535	513.6	571.6	703.2	0.889398	0.363869	-0.169098	Nonsignificant	None	5	Molecular Function:calcium ion binding (GO:0005509),Cellular Component:photosystem II (GO:0009523),Cellular Component:photosystem II oxygen evolving complex (GO:0009654),Biological Process:photosynthesis (GO:0015979),Cellular Component:extrinsic component of membrane (GO:0019898)	photosystem II oxygen-evolving enhancer protein 2	--	ko00195 Photosynthesis ko01100 Metabolic pathways	--	--	--
TRINITY_DN192121_c0_g1	NSF_ARATH, RecName: Full=Vesicle-fusing ATPase EC=3.6.4.6 AltName: Full=N-ethylmaleimide-sensitive fusion protein AltName: Full=Vesicular-fusion protein NSF	-	801.9	732.4	722.9	715.3	897.9	774.9	0.945187	0.517909	-0.081329	Nonsignificant	None	1	Molecular Function:ATP binding (GO:0005524)	vesicle-fusing ATPase	3.6.4.6		ATP-dependent 26S proteasome regulatory subunit	O	Posttranslational modification, protein turnover, chaperones ;
TRINITY_DN197139_c1_g1	2AAB_ARATH, RecName: Full=Serine/threonine-protein phosphatase 2A 65 kDa regulatory subunit A beta isoform Short=AtA beta Short=PP2A, subunit A, beta isoform	-	1151	1147.6	1168.6	1073.1	1084.2	1081	1.07069	0.00196746	0.0985344	Nonsignificant	None	1	Molecular Function:protein binding (GO:0005515)	serine/threonine-protein phosphatase 2A regulatory subunit A	--	ko03015 mRNA surveillance pathway	Predicted NTPase, NACHT family domain	T	Signal transduction mechanisms ;
TRINITY_DN197105_c0_g7	PGMC_BROIN, RecName: Full=Phosphoglucomutase, cytoplasmic Short=PGM EC=5.4.2.2 AltName: Full=Glucose phosphomutase	-	147.7	144.1	141.2	158.7	165.8	140.2	0.931784	0.298611	-0.101933	Nonsignificant	None	1	Biological Process:organic substance metabolic process (GO:0071704)	phosphoglucomutase	5.4.2.2	ko00010 Glycolysis / Gluconeogenesis ko00030 Pentose phosphate pathway ko00052 Galactose metabolism ko00230 Purine metabolism ko00500 Starch and sucrose metabolism ko00520 Amino sugar and nucleotide sugar metabolism ko01100 Metabolic pathways ko01110 Biosynthesis of secondary metabolites	Phosphoglucomutase	G	Carbohydrate transport and metabolism ;
TRINITY_DN192276_c1_g2	CY11_SOLTU, RecName: Full=Cytochrome c1-1, heme protein, mitochondrial AltName: Full=Complex III subunit 4-1 AltName: Full=Complex III subunit IV-1 AltName: Full=Cytochrome b-c1 complex subunit 4-1 AltName: Full=Ubiquinol-cytochrome-c reductase complex cytochrome c1 subunit 1 Short=Cytochrome c-1-1 Flags: Precursor	-	391.4	376.8	397.1	373	342.9	347.6	1.09572	0.0467254	0.131881	Nonsignificant	None	2	Molecular Function:electron carrier activity (GO:0009055),Molecular Function:heme binding (GO:0020037)	ubiquinol-cytochrome c reductase cytochrome c1 subunit	--	ko00190 Oxidative phosphorylation ko01100 Metabolic pathways	Cytochrome c1	C	Energy production and conversion ;
TRINITY_DN187631_c1_g3	HXK5_ORYSJ, RecName: Full=Hexokinase-5 EC=2.7.1.1 AltName: Full=Hexokinase I	-	1312.1	1281.6	1314.8	1262.7	1455.5	1270.8	0.97982	0.713199	-0.0294121	Nonsignificant	None	6	Biological Process:cellular glucose homeostasis (GO:0001678),Molecular Function:hexokinase activity (GO:0004396),Molecular Function:ATP binding (GO:0005524),Molecular Function:glucose binding (GO:0005536),Biological Process:carbohydrate metabolic process (GO:0005975),Biological Process:carbohydrate phosphorylation (GO:0046835)	hexokinase	2.7.1.1	ko00010 Glycolysis / Gluconeogenesis ko00051 Fructose and mannose metabolism ko00052 Galactose metabolism ko00500 Starch and sucrose metabolism ko00520 Amino sugar and nucleotide sugar metabolism ko01100 Metabolic pathways ko01110 Biosynthesis of secondary metabolites ko01200 Carbon metabolism	Hexokinase	G	Carbohydrate transport and metabolism ;
TRINITY_DN189589_c1_g1	HSP7M_PHAVU, RecName: Full=Heat shock 70 kDa protein, mitochondrial Flags: Precursor	-	366.7	352.7	352.3	334.8	328.1	346	1.06225	0.0416402	0.0871179	Nonsignificant	None	--	--	molecular chaperone DnaK	--	ko03018 RNA degradation	Molecular chaperone DnaK (HSP70)	O	Posttranslational modification, protein turnover, chaperones ;
TRINITY_DN192538_c0_g1	TRPC_ARATH, RecName: Full=Indole-3-glycerol phosphate synthase, chloroplastic {ECO:0000303|PubMed:7610197} Short=IGPS {ECO:0000303|PubMed:7610197} EC=4.1.1.48 {ECO:0000269|PubMed:7610197} Flags: Precursor	-	1362.3	1290.5	1315.9	1164	1105.6	1049.2	1.19582	0.00845519	0.258005	Nonsignificant	None	1	Molecular Function:indole-3-glycerol-phosphate synthase activity (GO:0004425)	indole-3-glycerol phosphate synthase	4.1.1.48	ko00400 Phenylalanine, tyrosine and tryptophan biosynthesis ko01100 Metabolic pathways ko01110 Biosynthesis of secondary metabolites ko01230 Biosynthesis of amino acids	Indole-3-glycerol phosphate synthase	E	Amino acid transport and metabolism ;
TRINITY_DN196717_c0_g2	SERA1_ARATH, RecName: Full=D-3-phosphoglycerate dehydrogenase 1, chloroplastic EC=1.1.1.95 {ECO:0000269|PubMed:24368794} AltName: Full=Protein EMBRYO SAC DEVELOPMENT ARREST 9 Flags: Precursor	-	58.5	59.9	63.2	62.5	50.3	61.9	1.0395	0.629827	0.0558846	Nonsignificant	None	3	Biological Process:metabolic process (GO:0008152),Molecular Function:NAD binding (GO:0051287),Biological Process:oxidation-reduction process (GO:0055114)	--	--	ko00260 Glycine, serine and threonine metabolism ko01100 Metabolic pathways ko01200 Carbon metabolism ko01230 Biosynthesis of amino acids	Predicted regulator of amino acid metabolism, contains ACT domain	R	General function prediction only ;
TRINITY_DN191597_c0_g3	RK6_ARATH, RecName: Full=50S ribosomal protein L6, chloroplastic AltName: Full=Protein EMBRYO DEFECTIVE 2394 Flags: Precursor	-	1673.7	1555.8	1656.1	1680.4	1625	1797.9	0.957341	0.318282	-0.0628947	Nonsignificant	None	4	Molecular Function:structural constituent of ribosome (GO:0003735),Cellular Component:ribosome (GO:0005840),Biological Process:translation (GO:0006412),Molecular Function:rRNA binding (GO:0019843)	large subunit ribosomal protein L6	--	ko03010 Ribosome	Ribosomal protein L6P/L9E	J	Translation, ribosomal structure and biogenesis ;
TRINITY_DN201019_c3_g1	APX8_ORYSJ, RecName: Full=Probable L-ascorbate peroxidase 8, chloroplastic {ECO:0000305} EC=1.11.1.11 {ECO:0000305} AltName: Full=OsAPx8 {ECO:0000303|PubMed:15599508} Flags: Precursor	-	783.1	1038.4	1052	970	830.3	969.5	1.03744	0.749811	0.0530272	Nonsignificant	None	4	Molecular Function:peroxidase activity (GO:0004601),Biological Process:response to oxidative stress (GO:0006979),Molecular Function:heme binding (GO:0020037),Biological Process:oxidation-reduction process (GO:0055114)	L-ascorbate peroxidase	1.11.1.11	ko00053 Ascorbate and aldarate metabolism ko00480 Glutathione metabolism	--	--	--
TRINITY_DN197848_c0_g1	HHL1_ARATH, RecName: Full=Protein HHL1, chloroplastic {ECO:0000305} AltName: Full=Hypersensitive to high light 1 {ECO:0000303|PubMed:24632535} Flags: Precursor	-	1291.4	1299.8	1276.4	1306.6	1265.1	1347.7	0.986784	0.549418	-0.0191942	Nonsignificant	None	--	--	--	--	--	--	--	--
TRINITY_DN187913_c0_g1	C89A9_ARATH, RecName: Full=Cytochrome P450 89A9 EC=1.14.-.-	-	1298.9	1180.4	1271.8	1300.5	1295.9	1214.2	0.984386	0.686678	-0.0227045	Nonsignificant	None	3	Molecular Function:iron ion binding (GO:0005506),Molecular Function:heme binding (GO:0020037),Biological Process:oxidation-reduction process (GO:0055114)	--	--	ko01100 Metabolic pathways	Cytochrome P450	QV	Secondary metabolites biosynthesis, transport and catabolism ; Defense mechanisms ;
TRINITY_DN171047_c2_g3	METE2_ORYSJ, RecName: Full=5-methyltetrahydropteroyltriglutamate--homocysteine methyltransferase 2 EC=2.1.1.14 AltName: Full=Cobalamin-independent methionine synthase 2	-	803.9	566.9	632.1	551.7	634.1	653.3	1.08907	0.534873	0.12309	Nonsignificant	None	4	Molecular Function:5-methyltetrahydropteroyltriglutamate-homocysteine S-methyltransferase activity (GO:0003871),Molecular Function:zinc ion binding (GO:0008270),Biological Process:cellular amino acid biosynthetic process (GO:0008652),Biological Process:methionine biosynthetic process (GO:0009086)	5-methyltetrahydropteroyltriglutamate--homocysteine methyltransferase	2.1.1.14	ko00270 Cysteine and methionine metabolism ko00450 Selenocompound metabolism ko01100 Metabolic pathways ko01110 Biosynthesis of secondary metabolites ko01230 Biosynthesis of amino acids	Methionine synthase II (cobalamin-independent)	E	Amino acid transport and metabolism ;
TRINITY_DN188367_c0_g1	FQR1_ARATH, RecName: Full=NAD(P)H dehydrogenase (quinone) FQR1 {ECO:0000305} EC=1.6.5.2 {ECO:0000269|PubMed:11842161} AltName: Full=Flavodoxin-like quinone reductase 1 {ECO:0000303|PubMed:11842161}	-	985.6	920.7	1032.1	1023.9	996.9	898.2	1.00665	0.903559	0.00955659	Nonsignificant	None	2	Molecular Function:FMN binding (GO:0010181),Molecular Function:oxidoreductase activity (GO:0016491)	NAD(P)H dehydrogenase (quinone)	1.6.5.2	ko00130 Ubiquinone and other terpenoid-quinone biosynthesis ko01110 Biosynthesis of secondary metabolites	Multimeric flavodoxin WrbA	C	Energy production and conversion ;
TRINITY_DN186270_c0_g1	RIN1_ARATH, RecName: Full=RuvB-like protein 1 EC=3.6.4.12 AltName: Full=49 kDa TATA box-binding protein-interacting protein homolog Short=AtTIP49a AltName: Full=Ruv DNA-helicase-like protein	-	944.4	894.3	907.3	1075.4	915.9	868.7	0.96014	0.609004	-0.0586835	Nonsignificant	None	3	Molecular Function:DNA helicase activity (GO:0003678),Molecular Function:ATP binding (GO:0005524),Molecular Function:ATP-dependent 5'-3' DNA helicase activity (GO:0043141)	RuvB-like protein 1 (pontin 52)	--		DNA helicase TIP49, TBP-interacting protein	K	Transcription ;
TRINITY_DN198754_c0_g1	RK122_SECCE, RecName: Full=50S ribosomal protein L12-2, chloroplastic AltName: Full=CL12-2 Flags: Precursor	-	569.7	636.1	636.4	611.5	607.1	732.8	0.94404	0.492048	-0.0830798	Nonsignificant	None	4	Molecular Function:structural constituent of ribosome (GO:0003735),Cellular Component:intracellular (GO:0005622),Cellular Component:ribosome (GO:0005840),Biological Process:translation (GO:0006412)	large subunit ribosomal protein L7/L12	--	ko03010 Ribosome	Ribosomal protein L7/L12	J	Translation, ribosomal structure and biogenesis ;
TRINITY_DN178795_c1_g1	SODM1_MAIZE, RecName: Full=Superoxide dismutase [Mn] 3.1, mitochondrial EC=1.15.1.1 Flags: Precursor	-	1509.6	1674.7	1600.2	1541	1578.6	1426.4	1.05246	0.295733	0.0737705	Nonsignificant	None	4	Molecular Function:superoxide dismutase activity (GO:0004784),Biological Process:superoxide metabolic process (GO:0006801),Molecular Function:metal ion binding (GO:0046872),Biological Process:oxidation-reduction process (GO:0055114)	superoxide dismutase, Fe-Mn family	1.15.1.1	ko04146 Peroxisome	Superoxide dismutase	P	Inorganic ion transport and metabolism ;
TRINITY_DN192211_c5_g1	GRS12_ORYSJ, RecName: Full=Monothiol glutaredoxin-S12, chloroplastic Flags: Precursor	-	1050.6	1115	999.6	947.8	1014.5	1028.1	1.05845	0.239483	0.0819582	Nonsignificant	None	3	Molecular Function:electron carrier activity (GO:0009055),Molecular Function:protein disulfide oxidoreductase activity (GO:0015035),Biological Process:cell redox homeostasis (GO:0045454)	--	--	--	Glutaredoxin-related protein	O	Posttranslational modification, protein turnover, chaperones ;
TRINITY_DN200063_c1_g1	ASPRX_ORYSJ, RecName: Full=Aspartic proteinase EC=3.4.23.- Flags: Precursor	-	33.8	39.6	32.2	37.8	29.2	33.1	1.05495	0.613758	0.0771679	Nonsignificant	None	3	Molecular Function:aspartic-type endopeptidase activity (GO:0004190),Biological Process:proteolysis (GO:0006508),Biological Process:lipid metabolic process (GO:0006629)	phytepsin	3.4.23.40	--	--	--	--
TRINITY_DN195822_c1_g2	ODPB1_ORYSJ, RecName: Full=Pyruvate dehydrogenase E1 component subunit beta-1, mitochondrial Short=PDHE1-B EC=1.2.4.1 Flags: Precursor	-	1194.3	1119.7	1130.9	1021.3	1070.6	1058.5	1.09348	0.0308306	0.128927	Nonsignificant	None	2	Molecular Function:pyruvate dehydrogenase (acetyl-transferring) activity (GO:0004739),Biological Process:acetyl-CoA biosynthetic process from pyruvate (GO:0006086)	pyruvate dehydrogenase E1 component beta subunit	1.2.4.1	ko00010 Glycolysis / Gluconeogenesis ko00020 Citrate cycle (TCA cycle) ko00620 Pyruvate metabolism ko01100 Metabolic pathways ko01110 Biosynthesis of secondary metabolites ko01200 Carbon metabolism	Pyruvate/2-oxoglutarate dehydrogenase complex, dihydrolipoamide acyltransferase (E2) component	C	Energy production and conversion ;
TRINITY_DN197923_c3_g1	SYFM_ARATH, RecName: Full=Phenylalanine--tRNA ligase, chloroplastic/mitochondrial {ECO:0000305} EC=6.1.1.20 {ECO:0000305} AltName: Full=Phenylalanyl-tRNA synthetase {ECO:0000305} Short=PheRS {ECO:0000305} Flags: Precursor	-	1418.2	1388.2	1241.3	1350.7	1279.3	1277	1.03601	0.494534	0.0510411	Nonsignificant	None	10	Molecular Function:tRNA binding (GO:0000049),Molecular Function:nucleotide binding (GO:0000166),Molecular Function:magnesium ion binding (GO:0000287),Molecular Function:aminoacyl-tRNA ligase activity (GO:0004812),Molecular Function:phenylalanine-tRNA ligase activity (GO:0004826),Molecular Function:ATP binding (GO:0005524),Cellular Component:cytoplasm (GO:0005737),Biological Process:phenylalanyl-t…	phenylalanyl-tRNA synthetase alpha chain	6.1.1.20	ko00970 Aminoacyl-tRNA biosynthesis	Phenylalanyl-tRNA synthetase alpha subunit	J	Translation, ribosomal structure and biogenesis ;
TRINITY_DN191854_c2_g1	XK2_ARATH, RecName: Full=Xylulose kinase 2 {ECO:0000303|PubMed:16920870} Short=Atxk-2 {ECO:0000303|PubMed:16920870} Short=Xylulokinase 2 {ECO:0000305} EC=2.7.1.17 {ECO:0000269|PubMed:16920870} AltName: Full=1-Deoxy-D-Xylulokinase {ECO:0000303|PubMed:16920870} Short=DXK {ECO:0000303|PubMed:16920870}	-	723	725.3	725.2	677.5	707.9	675.5	1.05464	0.0691943	0.0767456	Nonsignificant	None	1	Biological Process:carbohydrate metabolic process (GO:0005975)	xylulokinase	2.7.1.17	ko00040 Pentose and glucuronate interconversions ko01100 Metabolic pathways	Sugar (pentulose or hexulose) kinase	G	Carbohydrate transport and metabolism ;
TRINITY_DN188141_c0_g2	SERA2_ARATH, RecName: Full=D-3-phosphoglycerate dehydrogenase 2, chloroplastic Short=PGDH EC=1.1.1.95 {ECO:0000269|PubMed:24368794, ECO:0000269|PubMed:9867856} Flags: Precursor	-	71.6	62	79.2	179.2	113.4	77.2	0.575446	0.219321	-0.797247	Nonsignificant	None	4	Biological Process:metabolic process (GO:0008152),Molecular Function:amino acid binding (GO:0016597),Molecular Function:NAD binding (GO:0051287),Biological Process:oxidation-reduction process (GO:0055114)	--	--	ko00260 Glycine, serine and threonine metabolism ko01100 Metabolic pathways ko01200 Carbon metabolism ko01230 Biosynthesis of amino acids	Phosphoglycerate dehydrogenase or related dehydrogenase	HR	Coenzyme transport and metabolism ; General function prediction only ;
TRINITY_DN189023_c0_g1	DXR_ORYSJ, RecName: Full=1-deoxy-D-xylulose 5-phosphate reductoisomerase, chloroplastic Short=1-deoxyxylulose-5-phosphate reductoisomerase Short=DXP reductoisomerase EC=1.1.1.267 AltName: Full=2-C-methyl-D-erythritol 4-phosphate synthase Flags: Precursor	-	55.9	49.4	46	39.7	34.9	42.9	1.28766	0.0412651	0.364751	Significant	up	6	Molecular Function:protein binding (GO:0005515),Biological Process:isoprenoid biosynthetic process (GO:0008299),Molecular Function:1-deoxy-D-xylulose-5-phosphate reductoisomerase activity (GO:0030604),Molecular Function:metal ion binding (GO:0046872),Biological Process:oxidation-reduction process (GO:0055114),Molecular Function:NADPH binding (GO:0070402)	1-deoxy-D-xylulose-5-phosphate reductoisomerase	1.1.1.267	ko00900 Terpenoid backbone biosynthesis ko01100 Metabolic pathways ko01110 Biosynthesis of secondary metabolites	1-deoxy-D-xylulose 5-phosphate reductoisomerase	I	Lipid transport and metabolism ;
TRINITY_DN189238_c3_g3	TL15A_ARATH, RecName: Full=Thylakoid lumenal 15 kDa protein 1, chloroplastic AltName: Full=p15 Flags: Precursor	-	1177.8	1157.4	1196.1	1292.5	1245.7	1295.8	0.921049	0.00933686	-0.118651	Nonsignificant	None	--	--	--	--	--	Uncharacterized protein YjbI, contains pentapeptide repeats	S	Function unknown ;
TRINITY_DN199585_c1_g1	PWD_ORYSJ, RecName: Full=Phosphoglucan, water dikinase, chloroplastic EC=2.7.9.5 Flags: Precursor	-	1019.7	1018	1034.2	996.9	1003	1074.6	0.999154	0.97573	-0.00122055	Nonsignificant	None	1	Molecular Function:starch binding (GO:2001070)	phosphoglucan, water dikinase	2.7.9.5	--	--	--	--
TRINITY_DN197039_c0_g1	GSHRC_ORYSJ, RecName: Full=Glutathione reductase, cytosolic Short=GR Short=GRase EC=1.8.1.7	-	185	189.8	211.1	215.6	170	179.4	1.03699	0.691846	0.0524036	Nonsignificant	None	3	Molecular Function:oxidoreductase activity (GO:0016491),Biological Process:cell redox homeostasis (GO:0045454),Biological Process:oxidation-reduction process (GO:0055114)	glutathione reductase (NADPH)	1.8.1.7	ko00480 Glutathione metabolism	Pyruvate/2-oxoglutarate dehydrogenase complex, dihydrolipoamide dehydrogenase (E3) component or related enzyme	C	Energy production and conversion ;
TRINITY_DN193484_c2_g1	RL6_MESCR, RecName: Full=60S ribosomal protein L6 AltName: Full=YL16-like	-	1769.4	1530.2	1609.7	1672.9	1674.8	1462.3	1.02064	0.75632	0.0294804	Nonsignificant	None	4	Molecular Function:structural constituent of ribosome (GO:0003735),Cellular Component:intracellular (GO:0005622),Cellular Component:ribosome (GO:0005840),Biological Process:translation (GO:0006412)	large subunit ribosomal protein L6e	--	ko03010 Ribosome	--	--	--
TRINITY_DN193102_c0_g1	YCF54_PORPU, RecName: Full=Uncharacterized protein ycf54 AltName: Full=ORF108	-	997.4	956.3	950.7	1060	1043.5	1034.1	0.925676	0.0184257	-0.111421	Nonsignificant	None	--	--	--	--	--	--	--	--
[truncated: 6,765 more rows]
