# Supplementary material for: Multi-omics analysis reveals the molecular changes accompanying heavy-grazing-induced dwarfing of Stipa grandis
Source: Front Plant Sci. 2022 Oct 4;13:995074. doi: 10.3389/fpls.2022.995074 (PMC9673880; doi:10.3389/fpls.2022.995074)
Supplement: Supplementary file 4 [file Table_4.xlsx]

## Sheet: GO significantly enrichment
Supplementary Table S4. GO enrichment analysis of significantly differentially expressed proteins (DEPs)
GO_Class		GO_Term	GO_ID	Pvalue	AdjustedPv	x1	Up	Up_Prot_names	Down	Down_Prot_names
MF	Molecular Function	catalase activity	GO:0004096	4.23e-06	0.00217862	5	5	TRINITY_DN194680_c0_g1 TRINITY_DN202054_c2_g1 TRINITY_DN174994_c0_g1 TRINITY_DN187718_c1_g1 TRINITY_DN200039_c1_g4	0
MF		peroxidase activity	GO:0004601	7.65e-05	0.0131385	8	8	TRINITY_DN173688_c2_g1 TRINITY_DN194680_c0_g1 TRINITY_DN202054_c2_g1 TRINITY_DN174994_c0_g1 TRINITY_DN187718_c1_g1 TRINITY_DN200039_c1_g4 TRINITY_DN182924_c0_g4 TRINITY_DN190379_c2_g1	0
MF		heme binding	GO:0020037	0.000214229	0.0171047	10	10	TRINITY_DN173688_c2_g1 TRINITY_DN194680_c0_g1 TRINITY_DN202054_c2_g1 TRINITY_DN174994_c0_g1 TRINITY_DN187718_c1_g1 TRINITY_DN200039_c1_g4 TRINITY_DN198797_c0_g2 TRINITY_DN178619_c1_g1 TRINITY_DN182924_c0_g4 TRINITY_DN197040_c0_g1	0
MF		oxidoreductase activity	GO:0016491	0.0119679	0.350135	20	18	TRINITY_DN173688_c2_g1 TRINITY_DN194680_c0_g1 TRINITY_DN202054_c2_g1 TRINITY_DN174994_c0_g1 TRINITY_DN189023_c0_g1 TRINITY_DN187718_c1_g1 TRINITY_DN200039_c1_g4 TRINITY_DN178413_c1_g4 TRINITY_DN178413_c1_g8 TRINITY_DN198797_c0_g2 TRINITY_DN199941_c2_g4 TRINITY_DN182339_c1_g1 TRINITY_DN182924_c0_g4 TRINITY_DN179052_c2_g1 TRINITY_DN190379_c2_g1 TRINITY_DN195263_c1_g1 TRINITY_DN186637_c2_g1 TRINITY_…	2	TRINITY_DN184364_c0_g2 TRINITY_DN177722_c0_g1
MF		D-aminoacyl-tRNA deacylase activity	GO:0051499	0.0210591	0.350135	1	1	TRINITY_DN176032_c0_g2	0
MF		cutinase activity	GO:0050525	0.0210591	0.350135	1	1	TRINITY_DN166473_c0_g2	0
MF		coenzyme binding	GO:0050662	0.0264639	0.350135	7	7	TRINITY_DN189023_c0_g1 TRINITY_DN192657_c7_g1 TRINITY_DN198083_c8_g1 TRINITY_DN200655_c4_g1 TRINITY_DN185756_c1_g1 TRINITY_DN178969_c1_g1 TRINITY_DN195263_c1_g1	0
MF		flavin adenine dinucleotide binding	GO:0050660	0.0289124	0.350135	3	3	TRINITY_DN192657_c7_g1 TRINITY_DN185756_c1_g1 TRINITY_DN195263_c1_g1	0
MF		carboxylic ester hydrolase activity	GO:0052689	0.0338956	0.350135	2	2	TRINITY_DN176032_c0_g2 TRINITY_DN166473_c0_g2	0
MF		1-deoxy-D-xylulose-5-phosphate reductoisomerase activity	GO:0030604	0.0416789	0.350135	1	1	TRINITY_DN189023_c0_g1	0
MF		NADPH binding	GO:0070402	0.0416789	0.350135	1	1	TRINITY_DN189023_c0_g1	0
MF		cellulose synthase (UDP-forming) activity	GO:0016760	0.0416789	0.350135	1	1	TRINITY_DN201044_c0_g1	0
MF		4-alpha-hydroxytetrahydrobiopterin dehydratase activity	GO:0008124	0.0416789	0.350135	1	1	TRINITY_DN178870_c0_g2	0
MF		organic cyclic compound binding	GO:0097159	0.048302	0.350135	40	32	TRINITY_DN173688_c2_g1 TRINITY_DN194680_c0_g1 TRINITY_DN202054_c2_g1 TRINITY_DN174994_c0_g1 TRINITY_DN189023_c0_g1 TRINITY_DN187718_c1_g1 TRINITY_DN200039_c1_g4 TRINITY_DN192657_c7_g1 TRINITY_DN198083_c8_g1 TRINITY_DN196770_c2_g1 TRINITY_DN198797_c0_g2 TRINITY_DN200655_c4_g1 TRINITY_DN178619_c1_g1 TRINITY_DN199905_c3_g1 TRINITY_DN175860_c2_g4 TRINITY_DN201773_c1_g1 TRINITY_DN182924_c0_g4 TRINITY_…	8	TRINITY_DN200443_c1_g4 TRINITY_DN165493_c0_g2 TRINITY_DN190386_c0_g1 TRINITY_DN200685_c2_g1 TRINITY_DN199888_c2_g4 TRINITY_DN200066_c1_g1 TRINITY_DN189278_c0_g2 TRINITY_DN161109_c0_g1
MF		heterocyclic compound binding	GO:1901363	0.048302	0.350135	40	32	TRINITY_DN173688_c2_g1 TRINITY_DN194680_c0_g1 TRINITY_DN202054_c2_g1 TRINITY_DN174994_c0_g1 TRINITY_DN189023_c0_g1 TRINITY_DN187718_c1_g1 TRINITY_DN200039_c1_g4 TRINITY_DN192657_c7_g1 TRINITY_DN198083_c8_g1 TRINITY_DN196770_c2_g1 TRINITY_DN198797_c0_g2 TRINITY_DN200655_c4_g1 TRINITY_DN178619_c1_g1 TRINITY_DN199905_c3_g1 TRINITY_DN175860_c2_g4 TRINITY_DN201773_c1_g1 TRINITY_DN182924_c0_g4 TRINITY_…	8	TRINITY_DN200443_c1_g4 TRINITY_DN165493_c0_g2 TRINITY_DN190386_c0_g1 TRINITY_DN200685_c2_g1 TRINITY_DN199888_c2_g4 TRINITY_DN200066_c1_g1 TRINITY_DN189278_c0_g2 TRINITY_DN161109_c0_g1
CC	Cellular Component	extracellular region	GO:0005576	0.0113213	0.350135	2	1	TRINITY_DN166473_c0_g2	1	TRINITY_DN172326_c0_g1
BP	Biological Process	oxidation-reduction process	GO:0055114	1.71e-05	0.00439077	29	27	TRINITY_DN173688_c2_g1 TRINITY_DN194680_c0_g1 TRINITY_DN202054_c2_g1 TRINITY_DN174994_c0_g1 TRINITY_DN189023_c0_g1 TRINITY_DN187718_c1_g1 TRINITY_DN200039_c1_g4 TRINITY_DN178413_c1_g4 TRINITY_DN184937_c0_g4 TRINITY_DN192657_c7_g1 TRINITY_DN198083_c8_g1 TRINITY_DN178413_c1_g8 TRINITY_DN198797_c0_g2 TRINITY_DN200655_c4_g1 TRINITY_DN199941_c2_g4 TRINITY_DN178619_c1_g1 TRINITY_DN182339_c1_g1 TRINITY_…	2	TRINITY_DN184364_c0_g2 TRINITY_DN177722_c0_g1
BP		response to oxidative stress	GO:0006979	0.000204047	0.0171047	8	7	TRINITY_DN173688_c2_g1 TRINITY_DN194680_c0_g1 TRINITY_DN202054_c2_g1 TRINITY_DN174994_c0_g1 TRINITY_DN187718_c1_g1 TRINITY_DN200039_c1_g4 TRINITY_DN182924_c0_g4	1	TRINITY_DN192519_c2_g2
BP		metabolic process	GO:0008152	0.00190982	0.109284	72	64	TRINITY_DN173688_c2_g1 TRINITY_DN194680_c0_g1 TRINITY_DN202054_c2_g1 TRINITY_DN174994_c0_g1 TRINITY_DN198800_c1_g1 TRINITY_DN186324_c2_g2 TRINITY_DN183921_c0_g1 TRINITY_DN189023_c0_g1 TRINITY_DN194537_c0_g6 TRINITY_DN187718_c1_g1 TRINITY_DN200039_c1_g4 TRINITY_DN192296_c0_g2 TRINITY_DN201006_c1_g2 TRINITY_DN186379_c4_g1 TRINITY_DN192296_c0_g1 TRINITY_DN201044_c0_g1 TRINITY_DN178413_c1_g4 TRINITY_…	8	TRINITY_DN192519_c2_g2 TRINITY_DN184364_c0_g2 TRINITY_DN200443_c1_g4 TRINITY_DN185077_c1_g1 TRINITY_DN177722_c0_g1 TRINITY_DN171336_c0_g1 TRINITY_DN189278_c0_g2 TRINITY_DN174448_c0_g1
BP		response to stress	GO:0006950	0.0026749	0.137757	9	8	TRINITY_DN173688_c2_g1 TRINITY_DN194680_c0_g1 TRINITY_DN202054_c2_g1 TRINITY_DN174994_c0_g1 TRINITY_DN187718_c1_g1 TRINITY_DN200039_c1_g4 TRINITY_DN194355_c0_g1 TRINITY_DN182924_c0_g4	1	TRINITY_DN192519_c2_g2
BP		regulation of translation	GO:0006417	0.0113213	0.350135	2	1	TRINITY_DN193805_c4_g2	1	TRINITY_DN171336_c0_g1
BP		positive regulation of catalytic activity	GO:0043085	0.0143575	0.350135	2	1	TRINITY_DN187287_c3_g1	1	TRINITY_DN192519_c2_g2
BP		response to stimulus	GO:0050896	0.014412	0.350135	10	8	TRINITY_DN173688_c2_g1 TRINITY_DN194680_c0_g1 TRINITY_DN202054_c2_g1 TRINITY_DN174994_c0_g1 TRINITY_DN187718_c1_g1 TRINITY_DN200039_c1_g4 TRINITY_DN194355_c0_g1 TRINITY_DN182924_c0_g4	2	TRINITY_DN192519_c2_g2 TRINITY_DN165493_c0_g2
BP		regulation of cellular metabolic process	GO:0031323	0.018386	0.350135	3	1	TRINITY_DN193805_c4_g2	2	TRINITY_DN192519_c2_g2 TRINITY_DN171336_c0_g1
BP		positive regulation of cellular metabolic process	GO:0031325	0.025263	0.350135	2	1	TRINITY_DN193805_c4_g2	1	TRINITY_DN192519_c2_g2
BP		superoxide metabolic process	GO:0006801	0.0385822	0.350135	2	1	TRINITY_DN179637_c0_g3	1	TRINITY_DN192519_c2_g2
BP		deadenylation-dependent decapping of nuclear-transcribed mRNA	GO:0000290	0.0416789	0.350135	1	1	TRINITY_DN187287_c3_g1	0
BP		tetrahydrobiopterin biosynthetic process	GO:0006729	0.0416789	0.350135	1	1	TRINITY_DN178870_c0_g2	0

## Sheet: KEGG enrichment
Supplementary Table S4. KEGG enrichment analysis of significantly differentially expressed proteins (DEPs)
MapID	MapTitle	Pvalue	AdjustedPv	x1	x2	n	N	EnrichDirect	ProtID	Description
map00630	Glyoxylate and dicarboxylate metabolism	2.08123e-06	9.49033e-05	13	141	63	3207	Over	TRINITY_DN194680_c0_g1 TRINITY_DN202054_c2_g1 TRINITY_DN174994_c0_g1 TRINITY_DN187718_c1_g1 TRINITY_DN200039_c1_g4 TRINITY_DN184937_c0_g4 TRINITY_DN198083_c8_g1 TRINITY_DN190367_c0_g2 TRINITY_DN200655_c4_g1 TRINITY_DN197566_c2_g2 TRINITY_DN177722_c0_g1 TRINITY_DN179052_c2_g1 TRINITY_DN178969_c1_g1	,,,,,,,,,,,,
map00380	Tryptophan metabolism	3.9543e-06	9.49033e-05	8	50	63	3207	Over	TRINITY_DN194680_c0_g1 TRINITY_DN202054_c2_g1 TRINITY_DN174994_c0_g1 TRINITY_DN187718_c1_g1 TRINITY_DN200039_c1_g4 TRINITY_DN199941_c2_g4 TRINITY_DN182339_c1_g1 TRINITY_DN201492_c5_g2	,,,,,,,
map04016	MAPK signaling pathway - plant	3.1456e-05	0.000503296	7	48	63	3207	Over	TRINITY_DN194680_c0_g1 TRINITY_DN202054_c2_g1 TRINITY_DN174994_c0_g1 TRINITY_DN187718_c1_g1 TRINITY_DN200039_c1_g4 TRINITY_DN189278_c0_g2 TRINITY_DN161109_c0_g1	,,,,,,
map04146	Peroxisome	0.010551	0.126612	6	96	63	3207	Over	TRINITY_DN194680_c0_g1 TRINITY_DN202054_c2_g1 TRINITY_DN174994_c0_g1 TRINITY_DN187718_c1_g1 TRINITY_DN200039_c1_g4 TRINITY_DN179637_c0_g3	,,,,,
map00514	Other types of O-glycan biosynthesis	0.0389092	0.309021	1	2	63	3207	Over	TRINITY_DN183855_c2_g3
map03010	Ribosome	0.0430774	0.309021	9	231	63	3207	Over	TRINITY_DN185482_c3_g1 TRINITY_DN199905_c3_g1 TRINITY_DN195980_c1_g1 TRINITY_DN192771_c7_g5 TRINITY_DN178016_c0_g1 TRINITY_DN199113_c1_g3 TRINITY_DN186992_c4_g1 TRINITY_DN196873_c2_g1 TRINITY_DN172018_c2_g1	,,,,,,,,
map00330	Arginine and proline metabolism	0.0511023	0.309021	3	43	63	3207	Over	TRINITY_DN199941_c2_g4 TRINITY_DN182339_c1_g1 TRINITY_DN201492_c5_g2	,,
map00053	Ascorbate and aldarate metabolism	0.0515034	0.309021	4	72	63	3207	Over	TRINITY_DN199941_c2_g4 TRINITY_DN196355_c1_g6 TRINITY_DN182339_c1_g1 TRINITY_DN186637_c2_g1	,,,
map00410	beta-Alanine metabolism	0.0603295	0.321757	3	46	63	3207	Over	TRINITY_DN199941_c2_g4 TRINITY_DN182339_c1_g1 TRINITY_DN195263_c1_g1	,,
map01200	Carbon metabolism	0.0710664	0.325336	14	439	63	3207	Over	TRINITY_DN194680_c0_g1 TRINITY_DN202054_c2_g1 TRINITY_DN174994_c0_g1 TRINITY_DN187718_c1_g1 TRINITY_DN200039_c1_g4 TRINITY_DN184937_c0_g4 TRINITY_DN198083_c8_g1 TRINITY_DN190367_c0_g2 TRINITY_DN200655_c4_g1 TRINITY_DN197566_c2_g2 TRINITY_DN179052_c2_g1 TRINITY_DN178969_c1_g1 TRINITY_DN201343_c3_g1 TRINITY_DN195263_c1_g1	,,,,,,,,,,,,,
map00940	Phenylpropanoid biosynthesis	0.0813341	0.325336	4	84	63	3207	Over	TRINITY_DN173688_c2_g1 TRINITY_DN182924_c0_g4 TRINITY_DN198216_c0_g1 TRINITY_DN189320_c3_g2	,,,
map00340	Histidine metabolism	0.0974327	0.331661	2	27	63	3207	Over	TRINITY_DN199941_c2_g4 TRINITY_DN182339_c1_g1	,
map00910	Nitrogen metabolism	0.0974327	0.331661	2	27	63	3207	Over	TRINITY_DN190367_c0_g2 TRINITY_DN177722_c0_g1	,
map00310	Lysine degradation	0.103644	0.331661	2	28	63	3207	Over	TRINITY_DN199941_c2_g4 TRINITY_DN182339_c1_g1	,
map00280	Valine, leucine and isoleucine degradation	0.12098	0.346988	3	62	63	3207	Over	TRINITY_DN199941_c2_g4 TRINITY_DN182339_c1_g1 TRINITY_DN195263_c1_g1	,,
map00460	Cyanoamino acid metabolism	0.122892	0.346988	2	31	63	3207	Over	TRINITY_DN190367_c0_g2 TRINITY_DN198216_c0_g1	,
map00071	Fatty acid degradation	0.147911	0.394428	3	68	63	3207	Over	TRINITY_DN199941_c2_g4 TRINITY_DN182339_c1_g1 TRINITY_DN195263_c1_g1	,,
map04712	Circadian rhythm - plant	0.18019	0.455216	1	10	63	3207	Over	TRINITY_DN97666_c0_g2
map00400	Phenylalanine, tyrosine and tryptophan biosynthesis	0.213597	0.512634	2	44	63	3207	Over	TRINITY_DN177759_c0_g1 TRINITY_DN176909_c2_g4	,
map04120	Ubiquitin mediated proteolysis	0.294276	0.629456	2	55	63	3207	Over	TRINITY_DN199662_c1_g2 TRINITY_DN97666_c0_g2	,
map00561	Glycerolipid metabolism	0.301614	0.629456	2	56	63	3207	Over	TRINITY_DN199941_c2_g4 TRINITY_DN182339_c1_g1	,
map00510	N-Glycan biosynthesis	0.35463	0.704273	1	22	63	3207	Over	TRINITY_DN202023_c2_g1
map00620	Pyruvate metabolism	0.366809	0.704273	4	144	63	3207	Over	TRINITY_DN184937_c0_g4 TRINITY_DN199941_c2_g4 TRINITY_DN182339_c1_g1 TRINITY_DN179052_c2_g1	,,,
map03018	RNA degradation	0.42474	0.732697	3	91	63	3207	Over	TRINITY_DN178387_c0_g1 TRINITY_DN200685_c2_g1 TRINITY_DN187287_c3_g1	,,
map00020	Citrate cycle (TCA cycle)	0.436181	0.732697	3	96	63	3207	Over	TRINITY_DN184937_c0_g4 TRINITY_DN179052_c2_g1 TRINITY_DN176570_c1_g2	,,
map04144	Endocytosis	0.441252	0.732697	3	98	63	3207	Over	TRINITY_DN181494_c6_g2 TRINITY_DN175962_c2_g1 TRINITY_DN180984_c0_g1	,,
map03008	Ribosome biogenesis in eukaryotes	0.471653	0.732697	1	32	63	3207	Over	TRINITY_DN174448_c0_g1
map00270	Cysteine and methionine metabolism	0.4732	0.732697	3	109	63	3207	Over	TRINITY_DN184937_c0_g4 TRINITY_DN179052_c2_g1 TRINITY_DN197619_c1_g2	,,
map00480	Glutathione metabolism	0.4732	0.732697	3	109	63	3207	Over	TRINITY_DN197215_c0_g1 TRINITY_DN180515_c0_g2 TRINITY_DN197619_c1_g2	,,
map03060	Protein export	0.522062	0.741769	1	37	63	3207	Over	TRINITY_DN180516_c4_g3
map00360	Phenylalanine metabolism	0.531561	0.741769	1	38	63	3207	Over	TRINITY_DN201492_c5_g2
map00900	Terpenoid backbone biosynthesis	0.540874	0.741769	1	39	63	3207	Over	TRINITY_DN189023_c0_g1
map00640	Propanoate metabolism	0.616893	0.800294	1	48	63	3207	Over	TRINITY_DN195263_c1_g1
map01110	Biosynthesis of secondary metabolites	0.652409	0.824095	21	961	63	3207	Over	TRINITY_DN173688_c2_g1 TRINITY_DN194680_c0_g1 TRINITY_DN202054_c2_g1 TRINITY_DN174994_c0_g1 TRINITY_DN189023_c0_g1 TRINITY_DN187718_c1_g1 TRINITY_DN200039_c1_g4 TRINITY_DN184937_c0_g4 TRINITY_DN177759_c0_g1 TRINITY_DN199941_c2_g4 TRINITY_DN197566_c2_g2 TRINITY_DN182339_c1_g1 TRINITY_DN182924_c0_g4 TRINITY_DN179052_c2_g1 TRINITY_DN198216_c0_g1 TRINITY_DN194614_c1_g3 TRINITY_DN201343_c3_g1 TRINITY_…	,,,,,,,,,,,,,,,,,,,,
map00520	Amino sugar and nucleotide sugar metabolism	0.718734	0.849654	2	98	63	3207	Over	TRINITY_DN196838_c0_g1 TRINITY_DN155347_c0_g1	,
map04141	Protein processing in endoplasmic reticulum	1	1	4	202	63	3207	Over	TRINITY_DN181494_c6_g2 TRINITY_DN175962_c2_g1 TRINITY_DN180516_c4_g3 TRINITY_DN176456_c2_g2	,,,
