# Supplementary material for: Multi-omics analysis reveals the molecular changes accompanying heavy-grazing-induced dwarfing of Stipa grandis
Source: Front Plant Sci. 2022 Oct 4;13:995074. doi: 10.3389/fpls.2022.995074 (PMC9673880; doi:10.3389/fpls.2022.995074)
Supplement: Supplementary file 5 [file Table_5.xlsx]

## Sheet: Sheet1
Supplementary Table S5. Overview of metabolites identification
Index	Q1(Da)	Q3(Da)	Rt (min)	monoisotopic mass (Da)	Formula	Ionization model	KEGG ID	Compounds	Class	mix01	mix02	mix03	NG1	NG2	NG3	HG1	HG2	HG3
pmb2383	534.1	338	8.99	533.1	C27H46O14	[M+H]+	-	MGMG (18:2) isomer2	Lipids_Glycerolipids	908000	1070000	1270000	1440000	1350000	1450000	779000	1380000	1070000
pmb1626	534.4	262.9	9.15	533.4	C27H46O14	[M+H]+	-	MGMG (18:2) isomer1	Lipids_Glycerolipids	1040000	1520000	1800000	1160000	867000	1710000	588000	907000	840000
pmb2251	694.1	335.8	7.53	693.1	C33H60O14	[M+H]+	-	DGMG (18:1)	Lipids_Glycerolipids	44100000	37800000	45800000	39100000	40800000	35100000	47300000	46400000	43700000
pmb0159	696.4	696.2	7.53	695.4	C33H56O14	[M+H]+	-	DGMG (18:2) isomer2	Lipids_Glycerolipids	5980000	5030000	6630000	5460000	6640000	5180000	6160000	6180000	6110000
pmb0161	696.4	337.8	8.05	695.4	C33H56O14	[M+H]+	-	DGMG (18:2) isomer1	Lipids_Glycerolipids	14000000	15600000	19200000	19500000	17400000	15700000	15200000	21500000	15500000
pmb0163	696.4	696.3	8.24	695.4	C33H56O14	[M+H]+	-	DGMG (18:2) isomer3	Lipids_Glycerolipids	3420000	3030000	3760000	2370000	1860000	2440000	1550000	2540000	1940000
pme3069	556.3	371.2	10.22	555.284	C26H45NO7S	[M+H]+	C05122	Taurocholic acid	Organic acids	343000	350000	381000	374000	379000	366000	370000	363000	350000
pmb0322	653.3	345.9	4.7	652.13	C28H28O18	[M+H]+	-	3’,4’,5’-Tricetin O-rutinoside	Flavone	351000	303000	329000	1020000	169000	40000	135000	203000	320000
pmb3073	709.1	401.3	3.43	710.1	C28H38O17	[M-H]-	-	O-p-Coumaroyl quinic acid O-rutinoside derivative	Quinate and its derivatives	9090	6860	7570	4010	4270	7620	9250	10800	4860
pma6373	671.1	356	3.81	670.14	C28H30O19	[M+H]+	-	3',4',5'-Dihydrotricetin O-hexosyl-O-hexoside	Flavone	1270000	1200000	1220000	621000	916000	818000	1380000	3010000	1900000
pme3982	267.1	135.1	1.43	268.08	C10H12N4O6	[M-H]-	-	Hypoxanthine-9-β-D-arabinofuranoside	Nucleotide and its derivates	565000	553000	567000	631000	556000	583000	685000	530000	494000
pme1683	477.2	258.1	2.25	476.17	C18H32CaN2O10	[M+H]+	C12276	D-Pantothenic dcid	Organic acids	51900	48500	40400	38500	56500	94900	47300	34600	74500
pma1087	565.2	499.3	3.67	564.15	C26H28O14	[M+H]+	-	C-pentosyl-C-hexosyl-apigenin	Flavone C-glycosides	3960000	3710000	4530000	3250000	3830000	3970000	4130000	4690000	4070000
pmc1990	299.1	74.8	6.74	300.1	C17H16O5	[M-H]-	-	4'-Hydroxy-5,7-dimethoxyflavanone	Flavanone	917000	1010000	1040000	89500	70900	133000	41300	45700	61900
pmb1754	184	83.2	0.78	184.07	C5H15NO4P+	[M]+	C00588	O-Phosphocholine	Cholines	1720000	1600000	1710000	1880000	2390000	1340000	1660000	1180000	1430000
pme1419	164	61	1.77	163.07	C6H13NO2S	[M+H]+	-	L-Methionine methyl ester	Amino acid derivatives	2150000	2240000	2150000	1620000	2100000	1880000	2280000	1990000	2600000
pme0094	447.3	284.1	2.55	448.1	C21H20O11	[M-H]-	C08604	Cyanidin 3-O-glucoside (Kuromanin)	Anthocyanins	251000	265000	225000	204000	228000	124000	272000	222000	315000
pme1008	216	170.1	1.92	215.035	C9H10ClNO3	[M+H]+	-	3-Chloro-L-tyrosine	Amino acid derivatives	267000	299000	239000	289000	184000	222000	284000	281000	183000
pma0584	308.2	220.5	1.28	307.19	C16H25N3O3	[M+H]+	-	N-Caffeoylspermidine	Phenolamides	137000	136000	106000	131000	104000	98200	130000	93500	182000
pma0787	551.1	347.4	4.47	550.1	C24H22O15	[M+H]+	-	Quercetin-3-(6''-malonyl)-Glucoside	Flavonol	75700	51900	40800	30200	57500	20400	57100	47200	48200
pme3835	344.2	344	1.37	344.04	C10H12N5O7P	[M-H]-	C00942	Guanosine 3',5'-cyclic monophosphate	Nucleotide and its derivates	326000	336000	330000	421000	357000	328000	663000	94100	42700
pmb2556	345.1	167.2	2.35	344.11	C15H20O9	[M-H]-	-	Syringaldehyde O-glucoside	Others	450000	415000	353000	443000	540000	356000	467000	308000	343000
pmb2961	547.1	503.4	2.87	549.12	C25H24O14	[M-H]-	-	Peonidin O-malonylhexoside	Anthocyanins	33200	40400	33100	21000	62000	19700	9	9	52100
pmb2648	263.1	147.2	0.71	265.11	C12H16N4OS	[M-H]-	C00378	Thiamine	Vitamins	63500	74100	87100	65000	74400	55800	90000	74100	56200
pmb2957	465.1	285.3	2.5	467.1	C24H18O10	[M-H]-	-	Cyanidin O-syringic acid	Anthocyanins	492000	453000	516000	382000	9	266000	807000	694000	473000
pmb2165	412.3	184.7	5.64	412.25	C18H39NO7P+	[M]+	-	LysoPC 10:0	Lipids_Glycerophospholipids	10300	7410	8370	18800	9	9	9	9	9
pmb0563	301.1	273.6	3.98	301.07	C16H13O6	[M]+	C08726	Peonidin	Anthocyanins	119000	127000	138000	97300	95200	22500	172000	169000	134000
pme0444	493.2	331.6	2.87	493.13	C23H25O12	[M]+	C12140	Malvidin 3-O-glucoside (Oenin)	Anthocyanins	407000	381000	490000	368000	426000	499000	405000	339000	347000
pmb0558	637.1	303.5	3.24	636.1	C27H24O18	[M+H]+	-	Delphinidin O-malonyl-malonylhexoside	Anthocyanins	16400	22200	24600	30300	29400	21500	18700	48200	30800
pma6270	258.2	125.2	0.8	257.1	C8H20NO6P	[M+H]+	C00670	sn-Glycero-3-phosphocholine	Cholines	195000	153000	146000	202000	549000	66200	167000	90000	97000
pmb0168	700.1	184.4	9.28	699.48	C38H70NO8P	[M+H]+	-	PC 16:1/14:1	Lipids_Glycerophospholipids	83900	76300	84800	103000	95700	56800	98800	141000	92900
pmb0873	520	125	8.19	519.33	C26H50NO7P	[M+H]+	-	LysoPC 18:2 (2n isomer)	Lipids_Glycerophospholipids	9090000	8790000	8830000	12100000	7760000	8360000	10500000	13300000	6120000
pme2661	383	281.1	5.61	384.34	C27H44O	[M-H]-	C05443	Vitamin D3	Vitamins	22100	19900	18000	18600	20300	19500	14800	20600	19100
pmb3117	452	255.3	8.69	453.29	C21H44NO7P	[M-H]-	-	LysoPE 16:0	Lipids_Glycerophospholipids	860000	874000	873000	2030000	3320000	2940000	4760000	2690000	4060000
pmb2388	524.1	507.4	8.84	523.36	C26H54NO7P	[M+H]+	-	LysoPC 18:0 (2n isomer)	Lipids_Glycerophospholipids	56600	68300	61900	127000	52700	64200	86000	78000	45800
pmb2406	510.1	510.4	9.29	509.35	C25H52NO7P	[M+H]+	-	LysoPC 17:0	Lipids_Glycerophospholipids	319000	327000	328000	775000	1220000	478000	2080000	2640000	1950000
pmb0882	522.1	125.5	9.04	521.35	C26H52NO7P	[M+H]+	-	LysoPC 18:1	Lipids_Glycerophospholipids	154000	102000	138000	158000	61300	124000	145000	144000	97000
pmb0292	387.1	331.8	7.59	386.35	C27H46O	[M+H]+	C00187	Cholesterol	Others	1300000	1200000	1250000	1180000	1020000	1980000	1260000	887000	707000
pmb0149	351	259.8	6.62	350.25	C21H34O4	[M+H]+	-	MAG (18:4) isomer1	Lipids_Glycerolipids	692000	693000	738000	458000	548000	762000	662000	1290000	608000
pmb1562	351	259.9	7.75	350.25	C21H34O4	[M+H]+	-	MAG (18:4) isomer3	Lipids_Glycerolipids	133000	126000	122000	47300	71100	9	236000	164000	121000
pme2827	239	223	6.74	240.25	C16H32O	[M-H]-	C00517	Palmitaldehyde	Lipids_Fatty acids	48200000	51600000	54700000	5330000	3670000	7230000	2160000	2820000	3580000
pmb0677	831	831	4.05	830.23	C39H42O20	[M+H]+	-	C-hexosyl-chrysoeriol O-sinapoylhexoside	Flavone C-glycosides	130000	126000	146000	66000	68900	45200	204000	120000	155000
pmb2778	295	183.3	8.92	296.24	C18H32O3	[M-H]-	-	9,10-EODE	Lipids_Fatty acids	601000	621000	609000	539000	529000	234000	960000	766000	537000
pmb2799	295	277.5	9.7	296.24	C18H32O3	[M-H]-	-	12,13-EODE	Lipids_Fatty acids	11600	13100	15500	14800	11400	10500	13200	15500	12700
pmb0676	801	801	4.14	800.22	C38H40O19	[M+H]+	-	8-C-hexosyl-chrysoeriol O-feruloylhexoside	Flavone C-glycosides	32600	23700	17500	64500	21800	30700	30800	16200	31600
pmb0682	801	783.1	4.26	800.22	C38H40O19	[M+H]+	-	8-C-hexosyl-apigenin O-sinapoylhexoside	Flavone C-glycosides	589000	537000	575000	510000	404000	268000	712000	501000	773000
pmd0017	203	112	0.6	202.22	C10H26N4	[M+H]+	C00750	Spermine	Phenolamides	8050000	7150000	7230000	6750000	6490000	6930000	7730000	7420000	8340000
pmb0883	482.1	341.9	9.8	481.32	C23H48NO7P	[M+H]+	-	LysoPE 18:0	Lipids_Glycerophospholipids	4730	3200	4330	12600	9780	14000	13700	14200	10400
pmb0866	468.1	450.5	7.68	467.3	C22H46NO7P	[M+H]+	-	LysoPC 14:0	Lipids_Glycerophospholipids	316000	284000	327000	184000	277000	322000	479000	386000	325000
pmb2260	480.1	184.5	7.66	479.3	C23H46NO7P	[M+H]+	-	LysoPC 15:1	Lipids_Glycerophospholipids	105000	99900	101000	71100	91000	80900	145000	90900	86100
pmb0877	480.1	339.9	8.8	479.3	C23H46NO7P	[M+H]+	-	LysoPE 18:1	Lipids_Glycerophospholipids	46000	48500	46600	164000	51200	53600	42700	53600	32400
pmb2786	293	275.4	8.37	294.22	C18H30O3	[M-H]-	-	9-HOTrE	Lipids_Fatty acids	104000	128000	127000	103000	88800	55600	161000	146000	98300
pmb2792	293	193.2	7.77	294.22	C18H30O3	[M-H]-	-	13-HOTrE(r)	Lipids_Fatty acids	72800	70600	74700	90600	69100	107000	102000	84400	78900
pmb2789	309	291.5	7.8	310.21	C18H30O4	[M-H]-	-	13-HpOTrE(r)	Lipids_Fatty acids	5810	6490	6960	3860	4700	7620	9	23800	4140
pmb0885	291	273.9	6.65	290.19	C18H26O3	[M+H]+	-	4-oxo-9Z,11Z,13E,15E-octadecatetraenoic acid	Lipids_Fatty acids	250000	246000	248000	164000	173000	215000	236000	194000	157000
pmb2211	343.1	240.9	6.53	342.29	C19H38N2O3	[M+H]+	-	Cocamidopropyl betaine	Others	792000	702000	702000	641000	769000	411000	577000	716000	784000
pmb2643	225	207.2	10	226.19	C14H26O2	[M-H]-	C08322	Myristoleic acid (C14:1)	Lipids_Fatty acids	16600	18400	19200	16600	13900	15900	26100	27300	20800
pmb0164	355.1	263.8	8.38	354.28	C21H38O4	[M+H]+	-	MAG (18:2) isomer1	Lipids_Glycerolipids	548000	469000	490000	417000	567000	527000	475000	510000	522000
pmb0890	355.1	337.9	10.45	354.28	C21H38O4	[M+H]+	-	MAG (18:2)	Lipids_Glycerolipids	7670000	7280000	7000000	7370000	8280000	3090000	7930000	9540000	8210000
pmb0862	440.1	422.7	6.71	439.27	C20H42NO7P	[M+H]+	-	LysoPC 12:1	Lipids_Glycerophospholipids	12300	9950	12000	7280	11400	7090	23400	7260	10200
pmb2640	199	181.3	9.62	200.18	C12H24O2	[M-H]-	C02679	Lauric acid (C12:0)	Lipids_Fatty acids	74200	81600	79200	99900	48900	112000	54700	58000	55600
pmb1656	353.1	173.7	9.85	352.26	C21H36O4	[M+H]+	-	MAG (18:3) isomer4	Lipids_Glycerolipids	1700000	1660000	1730000	1480000	1960000	711000	2050000	2150000	2350000
pmb2325	353.1	261.8	8.33	352.26	C21H36O4	[M+H]+	-	MAG (18:3) isomer2	Lipids_Glycerolipids	21500000	19800000	19100000	21000000	20600000	21000000	18500000	19900000	19800000
pmb0578	655	287.7	4.59	654.16	C32H30O15	[M+H]+	-	Luteolin O-sinapoylhexoside	Flavone	124000	122000	113000	117000	89200	69000	173000	133000	121000
pmb3649	706.1	558.5	3.88	707.27	C26H45N9O10S2	[M-H]-	-	L-Cysteinyl-L-leucylglycyl-L-alanylglycylglycyl-L-alanylglycyl-L-cysteine	Amino acid derivatives	24200	24700	24100	18200	16200	17500	24100	36400	43100
pmb2833	529	329.3	2.23	530.16	C23H30O14	[M-H]-	-	3-O-Feruloyl quinic acid glucoside	Quinate and its derivatives	79300	68800	64700	60900	60500	82400	66800	80300	60900
pme1952	377	243.2	3.21	376.14	C17H20N4O6	[M+H]+	C00255	Riboflavin	Vitamins	20200000	19800000	18800000	13800000	15000000	28100000	18200000	18700000	19700000
pme1715	277	84	0.77	276.13	C11H20N2O6	[M+H]+	C00449	L-Saccharopine	Amino acid derivatives	2090000	1880000	1890000	1680000	1980000	1920000	1380000	1490000	1350000
pmb0771	314	177.5	4.87	313.13	C18H19NO4	[M+H]+	C02717	N-Feruloyl tyramine	Phenolamides	151000	142000	140000	71700	134000	61900	213000	207000	170000
pmb0615	789.1	789.1	2.63	788.24	C34H44O21	[M+H]+	-	Hesperetin C-hexosyl-O-hexosyl-O-hexoside	Flavone C-glycosides	112000	135000	143000	131000	190000	201000	107000	85300	135000
pme3967	312	180.1	2.23	311.12	C12H17N5O5	[M+H]+	-	2-(dimethylamino)guanosine	Nucleotide and its derivates	394000	426000	426000	632000	393000	510000	283000	388000	252000
pma0110	399	207.5	3.04	398.12	C18H22O10	[M+H]+	-	O-Sinapoyl quinic acid	Quinate and its derivatives	53200	72300	60100	49900	78100	50100	88000	42900	64900
pma0791	521	317.6	4.46	520.12	C24H24O13	[M+H]+	-	Naringenin O-malonylhexoside	Flavanone	106000	81600	103000	72200	81200	99500	105000	99900	110000
pmb0619	775.1	774.9	2.58	774.22	C33H42O21	[M+H]+	-	Eriodictiol 6-C-hexoside 8-C-hexoside-O-hexoside	Flavone C-glycosides	62200	61700	70900	65900	105000	54100	64300	52700	52000
pmb0592	771.1	463.2	3.76	770.23	C34H42O20	[M+H]+	-	Chrysoeriol O-hexosyl-O-rutinoside	Flavone	71400	54300	49700	24500	23100	9	98300	88600	98800
pmb0721	831.1	331.7	4.65	830.23	C39H42O20	[M+H]+	-	Tricin O-feruloylhexoside O-hexoside	Flavone	192000	177000	199000	200000	115000	176000	190000	128000	300000
pme3388	189	144.2	0.68	188.13	C7H16N4O2	[M+H]+	C01924	H-HomoArg-OH	Amino acid derivatives	952000	1000000	858000	827000	607000	929000	924000	1020000	1140000
pmb0130	203	133.3	4.66	202.11	C12H14N2O	[M+H]+	-	N-Acetyl tryptamine	Phenolamides	1200000	1160000	1220000	591000	717000	445000	1050000	2930000	1360000
pme2812	249	190.2	3.38	248.12	C13H16N2O3	[M+H]+	C05643	6-Hydroxymelatonin	Tryptamine derivatives	27000	23400	24400	31300	30500	38100	9	30800	17000
pme3337	384	252.1	2.17	383.11	C14H17N5O8	[M+H]+	-	N6-Succinyl Adenosine	Nucleotide and its derivates	6660000	7260000	6650000	5820000	6270000	9210000	9250000	6760000	4940000
pma0214	479	317.3	3.84	478.11	C22H22O12	[M+H]+	-	methylQuercetin O-hexoside	Flavonol	467000	618000	573000	342000	436000	217000	831000	796000	516000
pma0825	503	255.6	5.23	502.11	C24H22O12	[M+H]+	-	Chrysin O-malonylhexoside	Flavone	26800	25400	32800	11100	28900	7950	78600	22900	26900
pma0760	565	317.8	4.32	564.11	C25H24O15	[M+H]+	-	Selgin O-malonylhexoside	Flavone	616000	549000	542000	368000	565000	705000	455000	627000	464000
pmb0865	518.2	500.3	7.67	517.32	C26H48NO7P	[M+H]+	-	LysoPC 18:3 (2n isomer)	Lipids_Glycerophospholipids	552000	557000	566000	666000	447000	405000	695000	852000	507000
pmb0626	757.1	757	2.94	756.21	C33H40O20	[M+H]+	-	6-C-hexosyl-apigenin O-hexosyl-O-hexoside	Flavone C-glycosides	116000	89400	109000	9	9	783000	9	9	9
pmb0666	801.1	681.7	3.8	800.22	C38H40O19	[M+H]+	-	6-C-hexosyl-apigenin O-sinapoylhexoside	Flavone C-glycosides	278000	286000	297000	112000	152000	72600	434000	437000	433000
pme1841	103	86.1	0.62	102.12	C5H14N2	[M+H]+	C01672	1,5-Diaminopentane	Phenolamides	171000	161000	197000	165000	150000	85000	252000	194000	141000
pme2693	131	71.9	0.72	130.11	C6H14N2O	[M+H]+	C02714	N-Acetylputrescine	Phenolamides	872000	895000	771000	1050000	564000	507000	887000	965000	1140000
pme0043	175	69.9	0.73	174.11	C6H14N4O2	[M+H]+	C00062	L-(+)-Arginine	Amino acids	2870000	2960000	3040000	2180000	1960000	3640000	2380000	3820000	3040000
pme3246	341	179.1	2.72	342.13	C16H22O8	[M-H]-	C00761	Coniferin	Hydroxycinnamoyl derivatives	119000	81300	85000	83900	80200	9	93500	119000	89800
pmb5304	277.1	233.7	10.56	278.22	C18H30O2	[M-H]-	C06427	α-Linolenic acid	Lipids_Fatty acids	51900	48800	45100	40000	45500	33000	57900	61200	49100
pmb2804	311.1	293.4	7.82	312.23	C18H32O4	[M-H]-	C04717	13-HPODE	Lipids_Fatty acids	73700	75300	77300	58600	57800	34600	158000	79200	67500
pmb2653	649.1	503.3	0.74	650.23	C24H42O20	[M-H]-	-	D(+)-Melezitose O-rhamnoside	Carbohydrates	44400	41900	39700	19700	14700	39000	68600	39100	34500
pmb3028	535	329.4	3.68	536.13	C28H24O11	[M-H]-	-	Tricin O-sinapic acid	Flavone	86000	114000	102000	169000	111000	78000	107000	72700	89200
pme3961	252	136.1	1.96	251.1	C10H13N5O3	[M+H]+	C00559	Deoxyadenosine	Nucleotide and its derivates	3180000	3370000	3290000	2570000	5330000	1560000	6100000	1290000	2660000
pme3255	179	138	7.3	178.1	C11H14O2	[M+H]+	C10454	Methyleugenol	Hydroxycinnamoyl derivatives	59400	70000	51100	79700	66500	63600	50500	59000	56900
pme2786	219	160.1	3.23	218.11	C12H14N2O2	[M+H]+	C00978	N-Acetyl-5-hydroxytryptamine	Tryptamine derivatives	553000	588000	560000	408000	646000	156000	934000	829000	479000
pmb0801	346	184.5	1.57	345.11	C14H19NO9	[M+H]+	-	4-Pyridoxic acid O-hexoside	Vitamins	62900000	64800000	59800000	50200000	51700000	41300000	84900000	71800000	68300000
pme3210	433	270.9	3.93	432.11	C21H20O10	[M+H]+	C09126	Genistein 7-O-Glucoside (Genistin)	Isoflavone	2110000	1900000	1990000	1500000	1820000	384000	2480000	3150000	1150000
pme3268	449	286.9	3.93	448.1	C21H20O11	[M+H]+	C12626	Kaempferol 3-O-galactoside (Trifolin)	Flavonol	1610000	1680000	1790000	1200000	1350000	1430000	2100000	3840000	1120000
pmb0576	519	271.7	4.45	518.11	C24H22O13	[M+H]+	-	Apigenin O-malonylhexoside	Flavone	703000	563000	628000	262000	458000	231000	1080000	1040000	528000
pmb0672	771.1	367.9	3.9	770.21	C37H38O18	[M+H]+	-	6-C-hexosyl-apigenin O-feruloylhexoside	Flavone C-glycosides	138000	113000	107000	38800	57700	9	196000	158000	180000
pme2831	130	88.9	0.86	129.1	C4H11N5	[M+H]+	C07151	1,1-Dimethylbiguanide	Others	109000	115000	134000	111000	84200	99700	114000	91800	96400
pme0026	147	83.2	0.68	146.11	C6H14N2O2	[M+H]+	C00047	L-(+)-Lysine	Amino acids	10100000	10600000	10400000	10300000	8740000	12800000	10200000	11900000	7750000
pmb2855	307	145.2	0.73	308.12	C11H20N2O8	[M-H]-	-	L-Glutamine O-hexside	Amino acid derivatives	21500	24500	34400	65600	48200	19000	47100	34700	32600
pme0519	341	58.8	0.78	342.12	C12H22O11	[M-H]-	-	D-(+)-Sucrose	Carbohydrates	23400000	22700000	16900000	21900000	21100000	21700000	21300000	25900000	25800000
pme1450	231	144.1	4.61	232.12	C13H16N2O2	[M-H]-	C01598	Melatonin	Tryptamine derivatives	24900	28500	25800	27800	24500	31900	23400	21800	22800
pme1283	383	134	1.29	384.12	C14H20N6O5S	[M-H]-	C00021	S-(5'-Adenosy)-L-homocysteine	Amino acid derivatives	71400	77400	78700	67800	68500	136000	67500	92100	55500
pme3208	445	282.1	3.51	446.12	C22H22O10	[M-H]-	C16195	Glycitin	Isoflavone	61000	64900	64100	63500	84900	71500	64900	71200	63100
pmb2983	723.1	311.3	4.63	724.22	C33H40O18	[M-H]-	-	Chrysoeriol C-pentosyl-O-rhamnosyl-rhamnoside	Flavone C-glycosides	13400	11800	8990	15100	15900	11900	10500	16700	10400
pmb2991	739.1	269.3	3.72	740.22	C33H40O19	[M-H]-	-	Apigenin O-hexosyl-O-rutinoside	Flavone	15600	8250	11100	7280	12200	4030	14300	14400	8650
pme2292	89	71.9	0.64	88.1	C4H12N2	[M+H]+	C00134	Putrescine	Phenolamides	1630000	1540000	1600000	3150000	1460000	1190000	1410000	1790000	1240000
pmb1530	317.1	299.9	7.28	316.2	C20H28O3	[M+H]+	-	Phytocassane D	Terpenoids	335000	310000	323000	205000	203000	255000	330000	226000	200000
pmb2791	309.1	291.4	7.5	310.21	C18H30O4	[M-H]-	-	9-HpOTrE	Lipids_Fatty acids	70000	76700	70100	121000	68200	48900	76100	83000	52900
pme1474	298	135.1	2.85	297.09	C11H15N5O3S	[M+H]+	C00170	5'-Deoxy-5'-(methylthio)adenosine	Nucleotide and its derivates	25500000	26700000	26800000	36700000	28400000	15400000	25400000	22000000	22500000
pme3212	465	302.8	3.81	464.1	C21H20O12	[M+H]+	C05623	Quercetin 3-O-glucoside (Isotrifoliin)	Flavonol	462000	415000	421000	596000	655000	152000	318000	427000	217000
pmb0296	357.2	339.9	8.8	356.29	C21H40O4	[M+H]+	-	MAG (18:1) isomer2	Lipids_Glycerolipids	1290000	1220000	1290000	1310000	1140000	1150000	769000	1330000	1080000
pmb2363	357.2	339.9	8.69	356.29	C21H40O4	[M+H]+	-	MAG (18:1) isomer1	Lipids_Glycerolipids	4350000	4380000	4530000	7220000	4510000	4280000	4300000	5720000	5300000
pme1564	443	139.1	3.82	442.09	C22H18O10	[M+H]+	-	Epicatechin gallate (ECG)	Catechin derivatives	59900	73400	72200	86500	55000	32500	61200	67400	55800
pma0795	551	347.4	4.52	550.1	C24H22O15	[M+H]+	-	Tricetin O-malonylhexoside	Flavone	147000	133000	134000	61600	88900	49300	193000	195000	284000
pme1806	367	179.1	3.67	368.11	C17H20O9	[M-H]-	-	Chlorogenic acid methyl ester	Quinate and its derivatives	53200	66700	71300	106000	76100	34000	112000	44300	41300
pme3296	431	285.1	4.45	432.11	C21H20O10	[M-H]-	C16911	Kaempferol 3-O-rhamnoside (Kaempferin)	Flavonol	20600	23500	22500	55700	94500	9	2500	2250	9
pme2024	177	160.2	1.58	176.09	C10H12N2O	[M+H]+	C00780	serotonin	Tryptamine derivatives	15600000	15500000	17100000	10700000	11000000	3210000	27300000	16900000	25200000
pme2527	133	70	0.65	132.09	C5H12N2O2	[M+H]+	C00077	L(+)-Ornithine	Amino acids	171000	189000	177000	116000	176000	229000	127000	237000	207000
pme0041	132	85.9	1.23	131.09	C6H13NO2	[M+H]+	C00407	L-Isoleucine	Amino acids	1240000	1260000	1410000	983000	1000000	1380000	1710000	1420000	1460000
pme2569	219	156.1	1.13	218.09	C8H14N2O5	[M+H]+	C03740	(5-L-Glutamyl)-L-amino acid	Amino acid derivatives	101000	88100	91700	61400	54400	63000	84400	99300	90900
pme2755	222	138.1	0.6	221.09	C8H15NO6	[M+H]+	C00140	N-Acetyl-D-glucosamine	Carbohydrates	2160000	2480000	2370000	2730000	2510000	2190000	2390000	2270000	2550000
pme1194	228	112	1.13	227.09	C9H13N3O4	[M+H]+	C00881	Deoxycytidine	Nucleotide and its derivates	389000	284000	338000	447000	385000	204000	377000	304000	222000
pmb0325	321.1	177.5	2.82	320.2	C17H26N3O3	[M+H]+	-	N-Feruloyl spermidine	Phenolamides	1150000	1220000	1270000	1180000	1230000	818000	1620000	754000	1980000
pmb0489	397.1	147.4	1.69	396.19	C19H28N2O7	[M+H]+	-	N-hexosyl-p-coumaroyl putrescine	Phenolamides	428000	488000	442000	385000	395000	316000	802000	505000	350000
pme3221	165	137.1	6.54	164.08	C10H12O2	[M+H]+	C10469	Isoeugenol	Others	46900	34700	37200	60300	37200	31600	47300	9	9
pme2433	106	88.1	0.68	105.08	C4H11NO2	[M+H]+	C06772	Diethanolamine	Others	26500	24900	19300	36400	45500	28600	34500	46800	26400
pme2634	118	88	0.84	117.08	C5H11NO2	[M+H]+	C01826	Dl-Norvaline	Amino acids	11800000	11400000	11000000	9220000	8730000	10300000	15900000	11800000	12100000
pmb0786	180	84.2	0.61	179.08	C6H13NO5	[M+H]+	C00329	Glucosamine	Carbohydrates	319000	179000	324000	120000	205000	311000	247000	278000	264000
pme2046	170	96	0.67	169.09	C7H11N3O2	[M+H]+	-	3-N-Methyl-L-histidine	Amino acid derivatives	64800	48200	47700	67000	60800	31000	52500	52300	39900
pme0021	166	120.1	1.99	165.08	C9H11NO2	[M+H]+	C00079	L-Phenylalanine	Amino acids	17200000	17200000	16900000	14300000	11800000	12700000	25200000	18200000	17100000
pmb2591	245	203.2	3.83	246.1	C13H14N2O3	[M-H]-	C03137	Acetyl tryptophan	Amino acid derivatives	131000	131000	110000	124000	90700	9	167000	150000	153000
pme1090	308	162	1.13	307.08	C10H17N3O6S	[M+H]+	C00051	Glutathione reduced form	Amino acid derivatives	709000	617000	557000	17200000	12400000	13700000	569000	16600000	7940000
pma1751	286	124.3	2.03	285.08	C12H15NO7	[M+H]+	-	Nicotinic acid-hexoside	Nicotinic acid derivatives	328000	375000	320000	425000	333000	178000	381000	294000	459000
pme0460	291	139.1	3.27	290.08	C15H14O6	[M+H]+	C09727	L-Epicatechin	Catechin derivatives	65200	72100	50300	71400	61300	47700	55500	45800	46400
pme3431	341	179.1	2.69	340.08	C15H16O9	[M+H]+	C09264	Esculin (6,7-Dihydroxycoumarin-6-glucoside)	Coumarins	445000	455000	408000	361000	340000	390000	386000	499000	413000
pmb0500	411.1	177.5	4.74	410.18	C23H26N2O5	[M+H]+	-	N',N""-p-coumaroyl-feruloyl putrescine	Phenolamides	23700000	22700000	24200000	6250000	14200000	4540000	24200000	59300000	21700000
pmb0769	485.1	147.5	3.78	484.18	C25H28N2O8	[M+H]+	-	N-hexosyl-p-coumaroyl serotonin	Tryptamine derivatives	393000	356000	278000	381000	428000	284000	263000	426000	238000
pmd0023	266	134.2	1.88	267.1	C10H13N5O4	[M-H]-	C00212	Adenosine	Nucleotide and its derivates	2240000	2250000	2230000	474000	2300000	308000	4420000	363000	5360000
pma6561	341	179.2	3.01	342.1	C15H18O9	[M-H]-	-	Caffeic acid O-glucoside	Hydroxycinnamoyl derivatives	244000	191000	200000	190000	188000	319000	187000	219000	185000
pme1816	353	191.1	2.58	354.1	C16H18O9	[M-H]-	C17147	Neochlorogenic acid (5-O-Caffeoylquinic acid)	Quinate and its derivatives	2830000	2770000	2470000	14000000	627000	9	9	9	9
pme3129	463	301	3.8	464.1	C21H20O12	[M-H]-	-	Quercetin 4'-O-glucoside (Spiraeoside)	Flavonol	83100	81800	58300	124000	128000	22300	73000	77300	48000
pmb0819	157	130.4	2.45	156.07	C10H8N2	[M+H]+	C02938	3-Indoleacetonitrile	Indole derivatives	94800	112000	115000	9	81100	9	138000	123000	128000
pme3384	162	74	1.21	161.07	C6H11NO4	[M+H]+	-	N-Acetylthreonine	Amino acid derivatives	823000	847000	872000	619000	934000	815000	972000	789000	832000
pme3104	150	133.1	1.03	149.07	C6H7N5	[M+H]+	C02216	1-Methyladenine	Nucleotide and its derivates	2250000	2460000	2190000	1800000	2380000	9	3180000	2230000	4590000
pme3971	245	163.1	1.2	244.07	C9H12N2O6	[M+H]+	C02067	β-Pseudouridine	Nucleotide and its derivates	58300	69700	62400	32400	30100	50800	48200	53200	64900
pme3123	209	179.1	3.83	210.09	C11H14O4	[M-H]-	C02325	Sinapyl alcohol	Hydroxycinnamoyl derivatives	233000	214000	238000	388000	442000	249000	299000	194000	138000
pmb0829	98.9	81.1	0.89	97.98	H3O4P	[M+H]+	C00009	Phosphoric acid	Organic acids	4840000	4350000	4560000	5450000	7470000	4050000	3490000	3250000	3830000
pme3184	332	136.1	1.14	331.07	C10H14N5O6P	[M+H]+	C00360	2'-Deoxyadenosine-5'-monophosphate	Nucleotide and its derivates	3250000	3210000	3210000	3300000	3550000	2560000	1920000	4070000	4330000
pme3217	257	137.1	6.05	256.07	C15H12O4	[M+H]+	C08650	Isoliquiritigenin	Flavanone	16900	12900	10300	10000	14800	13200	11600	14000	19300
pme1516	307	139.1	2.73	306.07	C15H14O7	[M+H]+	C12136	Epigallocatechin (EGC)	Catechin derivatives	147000	143000	128000	130000	175000	72800	112000	278000	182000
pme1537	307	248.1	2.34	306.07	C15H14O7	[M+H]+	C12127	(+)-Gallocatechin (GC)	Catechin derivatives	65300	65000	46900	86100	76900	9	43800	87400	50800
pme3250	285	270.2	7	284.07	C16H12O5	[M+H]+	C00814	Biochanin A	Isoflavone	9600	6360	6140	6260	9	8070	7140	15700	9
pmb0803	508.1	152.5	3.15	507.17	C24H29NO11	[M+H]+	-	Pyridoxine O-feruloyl hexoside	Vitamins	26500	33600	31700	31000	36800	15900	9690	16300	39700
pme3282	273	97	3.29	274.08	C15H14O5	[M-H]-	C09320	Afzelechin (3,5,7,4'-Tetrahydroxyflavan)	Flavanone	105000	122000	107000	227000	126000	56100	107000	76100	93900
pmb0628	613.1	300.3	3.04	612.17	C27H32O16	[M+H]+	-	Eriodictiol C-hexosyl-O-hexoside	Flavone C-glycosides	329000	325000	270000	259000	96300	184000	278000	459000	539000
pmb0661	609.1	463.4	3.78	608.17	C28H32O15	[M+H]+	-	Chrysoeriol C-hexosyl-O-rhamnoside	Flavone C-glycosides	4680000	4100000	3750000	1080000	2580000	753000	6340000	5450000	5160000
pmb0725	669.1	669	5.04	668.17	C33H32O15	[M+H]+	-	Tricin 7-O-feruloylhexoside	Flavone	674000	603000	609000	280000	372000	82400	573000	606000	479000
pmb0732	669.1	669	3.71	668.17	C33H32O15	[M+H]+	-	Tricin 5-O-feruloylhexoside	Flavone	162000	138000	124000	718000	9	9	9	9	9
pmb0492	584.2	325.8	2.49	583.27	C34H37N3O6	[M+H]+	-	N',N"",N""'-p-coumaroyl-cinnamoyl-caffeoyl spermidine	Phenolamides	697000	749000	662000	377000	374000	576000	1630000	374000	549000
pmb3043	637.1	269.3	3.98	638.18	C29H34O16	[M-H]-	-	Tricin 5-O-rutinoside	Flavone	4800000	4740000	5620000	1640000	3990000	2610000	5710000	6370000	6130000
pmb3049	657.1	329.1	4.65	658.19	C32H34O15	[M-H]-	-	Tricin 4'-O-(syringyl alcohol) ether 7-O-hexoside	Flavonolignan	224000	242000	190000	214000	228000	153000	224000	303000	188000
pmb0962	235.1	118.4	0.77	234.16	C10H22N2O4	[M+H]+	-	Lysine butyrate	Amino acid derivatives	2470000	2460000	2570000	3060000	2470000	2180000	2360000	2600000	2220000
pmb2444	353.2	261.8	10	352.26	C21H36O4	[M+H]+	-	MAG (18:3) isomer1	Lipids_Glycerolipids	3430000	3820000	3850000	1930000	3550000	1040000	2280000	4860000	5910000
pme3200	74	56.9	0.71	73.06	C2H7N3	[M+H]+	-	1-methylguanidine	Nucleotide and its derivates	23900	25200	14300	25900	28200	9	26200	17200	13600
pme3017	104	85.9	0.74	103.06	C4H9NO2	[M+H]+	C03665	2-Aminoisobutyric acid	Amino acid derivatives	30900000	30400000	30800000	28100000	32200000	29000000	33100000	27600000	31900000
pme3033	104	58	0.75	103.06	C4H9NO2	[M+H]+	C01026	N,N-Dimethylglycine	Amino acid derivatives	1890000	1970000	1870000	1780000	1720000	1870000	2360000	1530000	1730000
pme2773	223	88	0.77	222.07	C7H14N2O4S	[M+H]+	C02291	L-Cystathionine	Amino acid derivatives	84600	80800	78800	51500	60100	49500	119000	98700	96600
pme2155	181	67	2.38	180.06	C7H8N4O2	[M+H]+	C07480	Theobromine	Alkaloids	343000	433000	385000	309000	392000	313000	325000	432000	306000
pmb1096	118	58.2	2.47	117.06	C8H7N	[M+H]+	C00463	Indole	Indole derivatives	3450000	3650000	3710000	3730000	3460000	2180000	3980000	3900000	5070000
pme1294	283	151.1	1.77	284.08	C10H12N4O6	[M-H]-	C01762	Xanthosine	Nucleotide and its derivates	1220000	1180000	1220000	1470000	1080000	903000	942000	1340000	1150000
pmb2928	331	313.7	2.09	332.07	C13H16O10	[M-H]-	-	Gallic acid O-Hexoside	Benzoic acid derivatives	10900000	9980000	9800000	9830000	11900000	13100000	11900000	7210000	7940000
pmb2850	329	314.2	5.68	330.07	C17H14O7	[M-H]-	-	Tricin	Flavone	16200000	16900000	16100000	15600000	13700000	14700000	13800000	18200000	7630000
pme1368	128	126	1.15	129.08	C6H11NO2	[M-H]-	C00408	L-Pipecolic acid	Amino acid derivatives	44900	39300	46000	38500	26700	44100	39400	32200	23100
pme0499	181	70.9	0.74	182.08	C6H14O6	[M-H]-	C00794	D-Sorbitol	Alcohols and polyols	792000	831000	788000	320000	359000	277000	1550000	1420000	1170000
pmb0601	595.1	301.8	4.05	594.16	C27H30O15	[M+H]+	-	Chrysoeriol O-hexosyl-O-pentoside	Flavone	52400	43100	43200	25200	68000	9	61300	105000	38100
pmb0653	595.1	415.4	3.64	594.16	C27H30O15	[M+H]+	-	di-C,C-hexosyl-apigenin	Flavone C-glycosides	100000	119000	97800	78300	29200	12800	91900	178000	202000
pmb0358	641.1	479.5	4.23	640.16	C28H32O17	[M+H]+	-	Selgin O-hexosyl-O-hexoside	Flavone	966000	855000	578000	780000	617000	636000	1240000	918000	806000
pmb0621	641.1	623	2.9	640.16	C28H32O17	[M+H]+	-	C-hexosyl-isorhamnetin O-hexoside	Flavone C-glycosides	150000	183000	153000	89400	119000	126000	162000	193000	170000
pma6372	643.1	332	4.83	642.16	C31H30O15	[M+H]+	-	Tricin O-vanilloylhexoside	Flavone	58700	62700	68400	59500	54000	9	79800	68700	90000
pmb2936	591.1	367.4	4.88	592.18	C28H32O14	[M-H]-	-	Disinapoyl hexoside	Hydroxycinnamoyl derivatives	32400	35400	34400	23400	30600	16700	27400	40600	67000
pmb3002	607.1	299.1	3.99	608.17	C28H32O15	[M-H]-	-	Chrysoeriol 7-O-rutinoside	Flavone	563000	611000	554000	165000	421000	156000	753000	771000	740000
pme3367	161	105.1	6.02	160.05	C10H8O2	[M+H]+	-	6-MethylCoumarin	Coumarins	4300000	3890000	3810000	2170000	3550000	4370000	3910000	4680000	5180000
pme3279	287	217.1	4.79	286.05	C15H10O6	[M+H]+	C12134	2'-Hydroxygenistein	Isoflavone	26000	27800	25500	37500	9	9	20500	32700	14800
pme0200	287	287	5.69	286.05	C15H10O6	[M+H]+	C05903	Kaempferol	Flavonol	30400	30600	33900	19500	24100	30200	25500	33000	43700
pme1210	150	72.8	1.18	149.05	C5H11NO2S	[M+H]+	C00073	L-Methionine	Amino acids	2590000	2610000	2550000	2110000	2400000	4010000	2490000	2580000	3240000
pme1109	152	135.1	1.15	151.05	C5H5N5O	[M+H]+	C00242	Guanine	Nucleotide and its derivates	33500000	31700000	31900000	73100000	35200000	30900000	26000000	18800000	8670000
pme2560	176	88	1.24	175.05	C6H9NO5	[M+H]+	C01042	N-Acetylaspartate	Amino acid derivatives	3090000	2750000	3090000	2930000	2650000	1880000	2600000	3360000	3650000
pmb0069	122	105.3	2.31	121.05	C7H7NO	[M+H]+	C09815	Benzamide	Others	357000	361000	393000	348000	312000	172000	459000	406000	635000
pme2268	138	137.9	0.79	137.05	C7H7NO2	[M+H]+	C01004	Trigonelline	Alkaloids	24700000	24400000	23700000	18900000	29800000	2010000	34200000	22200000	40600000
pme2890	269	134	0.81	268.06	C8H16N2O4S2	[M+H]+	C01817	L-Homocystine	Amino acids	102000	108000	81900	99800	87700	82100	164000	82700	97300
pme1376	308	112	1.25	307.06	C9H14N3O7P	[M+H]+	C00239	2'-Deoxycytidine-5'-monophosphate	Nucleotide and its derivates	61900	64800	73400	80900	86100	99000	83900	89700	73200
pme3174	324	112	0.78	323.05	C9H14N3O8P	[M+H]+	C00055	Cytidine 5'-monophosphate (Cytidylic acid)	Nucleotide and its derivates	69100	72700	67600	87900	102000	91500	86400	99200	67800
pmb2795	177	145.2	5.43	178.06	C10H10O3	[M-H]-	-	4-Methoxycinnamic acid	Hydroxycinnamoyl derivatives	484000	497000	487000	502000	525000	494000	631000	429000	296000
pme3292	283	268.1	6.95	284.07	C16H12O5	[M-H]-	C10521	Prunetin	Isoflavone	7620	9660	10900	7780	10500	4430	10200	10000	6270
pme3401	345	330.2	5.59	346.07	C17H14O8	[M-H]-	C11620	Syringetin	Flavonol	14500	13400	15000	15100	14500	18400	14300	17000	9510
pmb3116	474.2	277.4	7.66	475.27	C23H42NO7P	[M-H]-	-	LysoPE 18:3	Lipids_Glycerophospholipids	24200	27800	31900	25000	41000	30100	38300	31600	38800
pme0513	151	70.8	0.77	152.07	C5H12O5	[M-H]-	C00379	Xylitol	Alcohols and polyols	154000	143000	129000	86000	103000	100000	222000	196000	174000
pme2435	163	70.8	0.82	164.07	C6H12O5	[M-H]-	C01019	L-Fucose	Carbohydrates	14600	22900	16400	19700	16300	21500	34600	24000	23400
pme1846	179	70.9	0.76	180.06	C6H12O6	[M-H]-	C00031	D(+)-Glucose	Carbohydrates	1170000	1200000	1230000	896000	972000	737000	1820000	1700000	1440000
pme2036	191	85	1.13	192.06	C7H12O6	[M-H]-	C00296	Quinic acid	Quinate and its derivatives	6700000	4830000	4100000	3810000	4240000	5690000	6320000	4410000	5990000
pme3305	149	130.1	3.5	150.07	C9H10O2	[M-H]-	C02646	p-Coumaryl alcohol	Hydroxycinnamoyl derivatives	194000	251000	242000	318000	523000	281000	256000	111000	50800
pmb0652	565.1	397.8	3.55	564.15	C26H28O14	[M+H]+	-	C-hexosyl-apigenin O-pentoside	Flavone C-glycosides	173000	174000	176000	193000	68800	65300	178000	232000	319000
pmb0693	565.1	481.7	3.35	564.15	C26H28O14	[M+H]+	-	C-hexosyl-apigenin C-pentoside	Flavone C-glycosides	3730000	4090000	4290000	3940000	3170000	3520000	4990000	4280000	3610000
pmb0588	611.1	449.4	3.38	610.15	C27H30O16	[M+H]+	-	"Luteolin 3',7-di-O-glucoside"	Flavone	185000	210000	197000	145000	75900	114000	239000	357000	393000
pmb0624	611.1	329	3.05	610.15	C27H30O16	[M+H]+	-	6-C-hexosyl-luteolin O-hexoside	Flavone C-glycosides	435000	372000	392000	487000	147000	180000	466000	559000	495000
pma2088	627.1	465.2	4.77	626.15	C27H30O17	[M+H]+	-	Quercetin-3,4'-O-di-beta-glucopyranoside	Flavonol	152000	183000	190000	143000	111000	145000	226000	190000	152000
pmb0706	713.1	713.1	2.93	712.15	C30H32O20	[M+H]+	-	Quercetin 5-O-malonylhexosyl-hexoside	Flavonol	42000	39800	22400	43100	42100	45400	62900	53100	79000
pmb2554	529.1	355.9	2.23	530.16	C23H30O14	[M-H]-	-	5-O-Feruloyl quinic acid glucoside	Quinate and its derivatives	116000	84000	93400	103000	91600	100000	94600	127000	93600
pme0234	190	144	2.7	189.04	C10H7NO3	[M+H]+	C01717	Kynurenic acid	Organic acids	1500000	1620000	1710000	1320000	1310000	1470000	2010000	1870000	1680000
pme3143	177	121	4.31	176.05	C10H8O3	[M+H]+	-	6-Hydroxy-4-methylcoumarin	Coumarins	616000	541000	565000	264000	472000	415000	642000	742000	735000
pme0391	177	121	4.58	176.05	C10H8O3	[M+H]+	C03081	4-Methylumbelliferone	Coumarins	451000	347000	428000	243000	333000	254000	266000	364000	524000
pmb0426	219.1	189.5	3.78	218.14	C13H18N2O	[M+H]+	C08309	5-Methoxy-N,N-dimethyltryptamine	Tryptamine derivatives	325000	340000	268000	219000	305000	234000	212000	394000	191000
pme3179	179	75.9	0.78	178.04	C5H10N2O3S	[M+H]+	C01419	CYS-GLY	Amino acid derivatives	39900	39000	45500	256000	226000	283000	31400	258000	171000
pme2617	166	149.1	0.65	165.05	C5H11NO3S	[M+H]+	-	Methionine sulfoxide	Amino acid derivatives	15800000	16100000	14900000	14100000	13500000	16700000	15500000	15200000	16100000
pme0033	137	110	1.13	136.04	C5H4N4O	[M+H]+	C00262	Hypoxanthine	Nucleotide and its derivates	3250000	3260000	3180000	4050000	2790000	4750000	2640000	3910000	828000
pme3038	130	83.9	1.04	129.04	C5H7NO3	[M+H]+	C01879	5-oxoproline	Amino acid derivatives	2510000	2430000	2060000	3220000	1440000	1540000	1710000	2960000	3470000
pmb0468	178	161.5	1.55	177.05	C6H11NO3S	[M+H]+	C03145	N-formylmethionine	Amino acid derivatives	16700000	18600000	20600000	13300000	14000000	4170000	33800000	20700000	33200000
pme0395	153	135.1	4.2	152.05	C8H8O3	[M+H]+	-	2-Methoxybenzoic acid	Hydroxycinnamoyl derivatives	32900	24800	27700	21500	37800	25200	47500	16800	19400
pme1439	165	147.1	3.79	164.05	C9H8O3	[M+H]+	C00811	p-Coumaric acid	Hydroxycinnamoyl derivatives	863000	831000	819000	830000	1100000	1020000	1020000	514000	360000
pme2278	362	78.9	1.15	363.06	C10H14N5O8P	[M-H]-	-	Guanosine monophosphate	Nucleotide and its derivates	12000	9930	15200	13900	12500	7360	9640	8500	8170
pmd0158	424.2	285.8	7.37	425.25	C19H40NO7P	[M-H]-	-	LysoPE 14:0 (2n isomer)	Lipids_Glycerophospholipids	3060	3540	2600	3670	2570	3890	2210	2730	2070
pme2019	149	58.9	0.77	150.05	C5H10O5	[M-H]-	-	DL-Arabinose	Carbohydrates	1640000	1880000	1730000	1270000	1170000	799000	2620000	2750000	2380000
pme2914	161	56.8	1.4	162.05	C6H10O5	[M-H]-	C03761	3-Hydroxy-3-methylpentane-1,5-dioic acid	Amino acid derivatives	2320000	2270000	2280000	2170000	2310000	1280000	2480000	2230000	2970000
pmb2497	197	135.1	0.7	198.05	C9H10O5	[M-H]-	C05584	4-Hydroxy-3-methoxymandelate	Organic acids	45700	52100	56300	56300	56300	32800	45100	56400	36400
pme0038	112	95	0.75	111.04	C4H5N3O	[M+H]+	C00380	Cytosine	Nucleotide and its derivates	2270000	2130000	1900000	2330000	2050000	1980000	2550000	1680000	1740000
pma0134	121	77.1	1.14	120.04	C4H8O4	[M+H]+	-	D(-)-Threose	Carbohydrates	235000	212000	243000	675000	241000	154000	149000	108000	147000
pme0005	121	121	1.42	120.04	C5H4N4	[M+H]+	C15587	Purine	Nucleotide and its derivates	480000	488000	494000	402000	352000	805000	408000	416000	482000
pme0031	127	110	1.56	126.04	C5H6N2O2	[M+H]+	C00178	Thymine	Nucleotide and its derivates	1420000	1480000	1420000	2010000	1740000	1420000	2580000	555000	285000
pme0022	118	100.9	0.74	119.06	C4H9NO3	[M-H]-	C00188	L-Threonine	Amino acids	2130000	2110000	2140000	1160000	1730000	2730000	2960000	1880000	2020000
pmb0896	265.1	177.5	2.44	264.15	C14H20N2O3	[M+H]+	-	N'-Feruloyl putrescine	Phenolamides	14500000	16000000	14400000	10800000	15100000	10100000	17100000	16700000	20600000
pmb0907	265.1	177.5	2.44	264.15	C14H20N2O3	[M+H]+	C10497	N-Feruloyl putrescine	Phenolamides	781000	733000	713000	584000	813000	559000	779000	860000	919000
pmb0464	458.1	116.4	0.79	457.14	C16H27NO14	[M+H]+	-	Aspartic acid di-O-glucoside	Amino acid derivatives	1710000	1930000	1620000	2150000	1360000	1490000	1970000	2060000	1540000
pmb0776	337.1	177.5	2.73	336.15	C20H20N2O3	[M+H]+	-	N-Feruloyl tryptamine	Tryptamine derivatives	235000	228000	248000	240000	237000	111000	280000	87900	419000
pmb0770	353.1	177.5	4.73	352.14	C20H20N2O4	[M+H]+	-	N-Feruloyl serotonin	Tryptamine derivatives	1830000	1590000	1670000	1300000	1210000	588000	1450000	2400000	2380000
pmb0631	581.1	467.9	3.14	580.14	C26H28O15	[M+H]+	-	C-hexosyl-luteolin C-pentoside	Flavone C-glycosides	4750000	4830000	4590000	4720000	1360000	2850000	4560000	6960000	5790000
pmb0636	581.1	335.9	3.25	580.14	C26H28O15	[M+H]+	-	6-C-hexosyl luteolin O-pentoside	Flavone C-glycosides	64200	68800	98900	67700	15900	45900	105000	81000	90200
pmb0647	581.1	449.2	3.38	580.14	C26H28O15	[M+H]+	-	8-C-hexosyl-luteolin O-pentoside	Flavone C-glycosides	195000	273000	242000	179000	251000	185000	239000	224000	281000
pmb0746	527.1	331.7	5.79	526.15	C27H26O11	[M+H]+	-	Tricin 4'-O-β-guaiacylglycerol	Flavonolignan	1260000	1280000	1250000	1090000	1110000	1540000	1040000	1150000	929000
pmb2654	460.1	118.2	0.74	461.15	C19H27NO12	[M-H]-	-	Anthranilate O-hexosyl-O-hexoside	Benzoic acid derivatives	6910000	6530000	5410000	1520000	2790000	10100000	7090000	6850000	7440000
pmb3061	499.1	163.2	2.18	500.15	C22H28O13	[M-H]-	-	5-O-p-coumaroyl quinic acid O-hexoside	Quinate and its derivatives	16400	19700	19500	26200	5600	36400	16900	15800	15700
pmb3005	621.1	299.4	4.08	622.15	C28H30O16	[M-H]-	-	Chrysoeriol O-rhamnosyl-O-glucuronic acid	Flavone	31800	41600	36900	28300	38800	31000	18000	53000	47200
pmb0852	520.3	502.3	8.36	519.33	C26H50NO7P	[M+H]+	-	LysoPC 18:2	Lipids_Glycerophospholipids	17500000	16400000	15800000	12900000	13200000	15900000	21500000	18200000	12100000
pme2289	287.2	143.4	10.93	286.23	C20H30O	[M+H]+	C00473	Vitamin A	Vitamins	34500	38800	30800	35000	34400	41600	31100	44600	42900
pme1692	347	78.8	1.18	348.05	C10H13N4O8P	[M-H]-	C00130	Inosine 5'-monophosphate	Nucleotide and its derivates	25200	25200	24000	9	67100	8390	15600	12300	79400
pme0088	285	133.1	5.04	286.05	C15H10O6	[M-H]-	C01514	Luteolin	Flavone	15600	14600	14700	17200	3930	3900	7690	14400	13100
pme1568	285	257.1	5.05	286.05	C15H10O6	[M-H]-	C10510	Orobol (5,7,3',4'-tetrahydroxyisoflavone)	Isoflavone	11300	14200	11800	13300	12800	10600	13600	13700	13600
pme3514	301	151.1	5.08	302.04	C15H10O7	[M-H]-	C10105	Morin	Flavonol	16800	12900	14300	13000	9020	4990	11900	23800	18800
pme0199	301	151.1	5.08	302.04	C15H10O7	[M-H]-	C00389	Quercetin	Flavonol	20300	22300	16900	14600	11500	5760	13200	26100	20600
pma6298	96	80.2	1.07	95.04	C5H5NO	[M+H]+	-	3-Hydroxypyridine	Others	206000	194000	188000	203000	236000	218000	205000	94500	46000
pme1218	124	77.8	1.21	123.03	C6H5NO2	[M+H]+	C10164	2-Picolinic acid	Organic acids	666000	704000	682000	434000	525000	676000	914000	681000	742000
pme2671	123	76.9	3.68	122.04	C7H6O2	[M+H]+	C00633	4-Hydroxybenzaldehyde	Benzoic acid derivatives	2010000	2030000	1920000	2100000	2620000	2490000	2320000	1430000	1060000
pme1987	88	88.2	0.75	89.05	C3H7NO2	[M-H]-	C00041	L-Alanine	Amino acids	4970	5910	6280	9	2430	7640	8040	5940	5730
pme0009	104	73.9	0.72	105.04	C3H7NO3	[M-H]-	C00065	L-Serine	Amino acids	1650000	1700000	1720000	1760000	1670000	2270000	1610000	1700000	1530000
pme3193	116	73.9	1.2	117.04	C4H7NO3	[M-H]-	-	N-acetylglycine	Amino acid derivatives	38900	28600	40800	30600	33300	49200	41600	32000	37300
pme0207	103	103	1.39	104.05	C4H8O3	[M-H]-	-	3-Hydroxybutyrate	Organic acids	1210000	1380000	1920000	3060000	919000	1490000	1470000	1340000	1510000
pme2049	103	56.8	1.57	104.05	C4H8O3	[M-H]-	C05984	2-Hydroxybutanoic acid	Organic acids	241000	264000	242000	332000	278000	248000	250000	210000	161000
pme2541	103	56.8	1.55	104.05	C4H8O3	[M-H]-	-	α-Hydroxyisobutyric acid	Organic acids	41300	39200	44300	55900	48500	44000	48400	48100	31400
pme2935	115	97.9	2.15	116.05	C5H8O3	[M-H]-	C06255	2-Oxovaleric acid	Organic acids	17700	20100	16700	18900	17700	17000	13900	11700	21400
pmb0490	235.1	147.5	2.27	234.14	C13H18N2O2	[M+H]+	C18326	N-p-Coumaroyl putrescine	Phenolamides	14600000	15500000	14300000	9650000	11800000	9380000	28400000	14400000	13300000
pmb0505	235.1	147.4	2.27	234.14	C13H18N2O2	[M+H]+	-	N'-p-Coumaroyl putrescine	Phenolamides	17600000	18100000	18400000	10700000	14300000	11600000	36500000	16200000	15200000
pmb0323	251.1	233.5	1.89	250.13	C13H18N2O3	[M+H]+	C03002	N-Caffeoyl putrescine	Phenolamides	3640000	3670000	3730000	2070000	3630000	2420000	7390000	4670000	2950000
pme0057	136	89.9	0.81	135.04	C4H9NO2S	[M+H]+	C00155	DL-homocysteine	Amino acids	285000	287000	338000	322000	318000	365000	231000	216000	288000
pmb0202	153	136.4	1.16	152.03	C5H4N4O2	[M+H]+	C00385	Xanthine	Nucleotide and its derivates	741000	668000	632000	1180000	628000	610000	657000	595000	435000
pme3030	164	76	1.65	163.03	C5H9NO3S	[M+H]+	C06809	N-Acetylcysteine	Amino acid derivatives	491000	502000	550000	565000	508000	200000	645000	532000	558000
pme1261	206.1	188.2	2.29	205.13	C9H19NO4	[M+H]+	C05944	Pantothenol	Alcohols and polyols	50700	52300	52500	45700	60500	34300	30400	30300	19300
pme2997	163	121	4.46	162.03	C9H6O3	[M+H]+	C20414	4-Hydroxycoumarin	Coumarins	198000	195000	208000	198000	167000	107000	235000	268000	225000
pme2758	162	144.1	0.78	163.05	C5H9NO5	[M-H]-	C03079	4-Hydroxy-L-glutamic acid	Amino acid derivatives	20200	22300	21900	22800	22900	19700	22200	18000	15000
pme2798	165	150.1	1.69	166.05	C6H6N4O2	[M-H]-	C16353	7-Methylxanthine	Nucleotide and its derivates	93700	78200	95200	96400	122000	70500	67800	90700	57900
pme2277	152	108.1	1.34	153.04	C7H7NO3	[M-H]-	-	3-Aminosalicylic acid	Organic acids	122000	117000	110000	49000	93400	122000	243000	9	208000
pme2603	152	108.1	2.67	153.04	C7H7NO3	[M-H]-	C00632	3-Hydroxyanthranilic acid	Organic acids	48600	43800	40700	36100	47800	18200	89500	25500	24100
pme3083	164	92	3.84	165.04	C8H7NO3	[M-H]-	-	2-(Formylamino)benzoic acid	Organic acids	470000	562000	570000	728000	776000	758000	657000	266000	234000
pme0413	151	136.1	3.97	152.05	C8H8O3	[M-H]-	C00755	Vanillin	Benzoic acid derivatives	2310000	2690000	2580000	2970000	3560000	3220000	3120000	1660000	1280000
pmb0772	307.1	131.4	5.89	306.14	C19H18N2O2	[M+H]+	-	N-Cinnamoyl serotonin	Tryptamine derivatives	14100	17100	15100	9940	11800	9	12800	28800	21200
pme1518	403.1	373.1	7.02	402.13	C21H22O8	[M+H]+	C10112	Nobiletin	Flavone	89300	88600	89200	62300	52200	62700	46500	62100	64500
pma0253	477.1	315.5	5.27	476.13	C23H24O11	[M+H]+	-	O-methylChrysoeriol 5-O-hexoside	Flavone	345000	356000	314000	256000	274000	111000	433000	544000	343000
pmb0724	477.1	331.8	4.94	476.13	C23H24O11	[M+H]+	-	Tricin O-rhamnoside	Flavone	259000	253000	257000	112000	228000	89200	420000	436000	294000
pmb0855	496.3	478.3	8.74	495.33	C24H50NO7P	[M+H]+	-	LysoPC 16:0	Lipids_Glycerophospholipids	567000	558000	586000	825000	1390000	874000	1910000	2280000	1970000
pmd0132	496.3	478.3	8.57	495.33	C24H50NO7P	[M+H]+	-	LysoPC 16:0 (2n isomer)	Lipids_Glycerophospholipids	2970000	3000000	3370000	2240000	2880000	2130000	4820000	6300000	4550000
pma0359	535.1	287.8	4.5	534.14	C25H26O13	[M+H]+	-	Tricin 5-O-acetylglucoside	Flavone	46300	37700	27300	25400	29300	26600	64900	52700	32600
pmb0745	497.1	331.8	5.56	496.14	C26H24O10	[M+H]+	-	Tricin 4'-O-syringyl alcohol	Flavonolignan	3040000	3130000	3120000	2730000	3100000	4310000	2400000	2210000	1800000
pmb3066	481.1	445.4	2.52	482.14	C22H26O12	[M-H]-	-	5-O-p-coumaroyl shikimic acid O-hexoside	Quinate and its derivatives	407000	389000	376000	449000	530000	348000	366000	367000	291000
pmb3072	481.1	319.3	3.13	482.14	C22H26O12	[M-H]-	-	3-O-p-coumaroyl shikimic acid O-hexoside	Quinate and its derivatives	48800	58600	45000	74500	54300	62900	39200	51500	48700
pmb2978	563.1	269.3	3.93	564.15	C26H28O14	[M-H]-	-	Apigenin O-hexosyl-O-pentoside	Flavone	31500	25300	20100	16800	44600	9	9	42800	23800
pme0436	577.1	407.3	2.87	578.14	C30H26O12	[M-H]-	-	Procyanidin B3	Proanthocyanidins	6380	5310	5460	7420	9230	1870	9	4770	2680
pmb1650	279.2	149.4	9.64	278.22	C18H30O2	[M+H]+	-	Octadeca-11E,13E,15Z-trienoic acid	Lipids_Fatty acids	3680000	3870000	3890000	3930000	3370000	5350000	4280000	4280000	4490000
pma3606	295.2	179.5	9.18	294.22	C18H30O3	[M+H]+	-	9-Hydroxy-(10E,12Z,15Z)-octadecatrienoic acid	Lipids_Fatty acids	534000	621000	676000	478000	450000	397000	764000	789000	478000
pme0246	122	80.1	0.78	121.02	C3H7NO2S	[M+H]+	C00097	L-Cysteine	Amino acids	94000	66400	85100	108000	76000	70900	79600	113000	76600
pmb0501	131.1	72.1	0.64	130.12	C5H14N4	[M+H]+	C00179	Agmatine	Phenolamides	679000	761000	671000	950000	470000	376000	689000	681000	852000
pme0016	241	119.9	0.77	240.02	C6H12N2O4S2	[M+H]+	C00491	L-(-)-Cystine	Amino acids	110000	135000	111000	131000	127000	104000	132000	155000	158000
pme2828	140	98.9	0.59	139.03	C6H5NO3	[M+H]+	C00870	4-Nitrophenol	Others	7120000	6790000	6520000	7470000	6700000	6780000	6810000	6960000	5690000
pme1691	147.1	88	0.77	146.12	C7H16NO2	[M+H]+	C08201	Acetylcholine	Cholines	535000	757000	562000	605000	507000	596000	851000	616000	688000
pme2486	155	137	2.3	154.03	C7H6O4	[M+H]+	C00230	Protocatechuic acid	Catechin derivatives	1240000	1170000	1060000	1270000	1470000	1720000	840000	742000	1100000
pme0170	217.1	158.1	1.12	216.12	C8H16N4O3	[M+H]+	-	Nα-Acetyl-L-arginine	Amino acid derivatives	2600000	2620000	2530000	2080000	1690000	2800000	3600000	2570000	2400000
pme0283	167	149.1	2.89	166.03	C8H6O4	[M+H]+	C01606	Phthalic acid	Organic acids	2080000	2190000	2160000	3130000	3080000	3140000	1370000	1590000	1200000
pme3564	179	179	3.31	178.03	C9H6O4	[M+H]+	C03093	Daphnetin	Coumarins	261000	331000	289000	260000	239000	270000	339000	343000	243000
pme2884	166	124.1	0.77	167.04	C3H9N3O3S	[M-H]-	-	Guanidinoethyl sulfonate	Organic acids	50800	60900	59700	9	41400	9	61000	107000	78100
pmb3099	153	78.9	1.61	154.04	C4H11O4P	[M-H]-	C06608	Diethyl phosphate	Organic acids	1170000	1130000	1100000	845000	1010000	2280000	2090000	1800000	1860000
pme0243	131	86.9	1.9	132.04	C5H8O4	[M-H]-	C00489	Glutaric acid	Organic acids	757000	753000	684000	670000	881000	357000	876000	820000	729000
pme0267	131	86.9	2.08	132.04	C5H8O4	[M-H]-	-	2-Methylsuccinic acid	Organic acids	927000	858000	830000	828000	921000	487000	1050000	1180000	818000
pme3034	131	86.9	1.89	132.04	C5H8O4	[M-H]-	-	ethylmalonate	Organic acids	46700	67800	51900	52500	53400	24700	57700	64000	52300
pmb2826	147	85	0.92	148.04	C5H8O5	[M-H]-	C00815	Citramalate	Organic acids	239000	304000	171000	221000	223000	179000	320000	212000	299000
pme0240	121	77	4.53	122.04	C7H6O2	[M-H]-	C00180	Benzoic acid	Benzoic acid derivatives	369000	443000	471000	354000	124000	210000	167000	126000	101000
pmb3110	167	152.1	3.29	168.04	C8H8O4	[M-H]-	C06672	Vanillic acid	Hydroxycinnamoyl derivatives	62200	62700	64600	104000	79300	69200	47300	50300	37000
pme0309	183	124.1	3.11	184.04	C8H8O5	[M-H]-	-	Methyl gallate	Benzoic acid derivatives	100000	97100	69400	28200	9	9	9	40500	25300
pme0303	179	135.1	3.16	180.04	C9H8O4	[M-H]-	C01197	Caffeic acid	Hydroxycinnamoyl derivatives	451000	443000	442000	908000	453000	426000	579000	288000	229000
pmb0789	332.1	314.7	1.14	331.13	C14H21NO8	[M+H]+	-	Pyridoxine O-glucoside	Vitamins	10600000	10700000	10200000	10900000	11400000	7740000	6400000	14300000	13700000
pme1550	373.1	373.1	7.5	372.12	C20H20O7	[M+H]+	C10190	Tangeretin	Flavone	48500	41600	41000	26900	28700	27800	26900	27500	24700
pme0372	435.1	273.1	4.17	434.12	C21H22O10	[M+H]+	C09099	Naringenin 7-O-glucoside (Prunin)	Flavanone	515000	522000	520000	318000	373000	314000	518000	510000	389000
pma0724	435.1	339.7	3.74	434.12	C21H22O10	[M+H]+	-	Naringenin C-hexoside	Flavone C-glycosides	158000	174000	146000	121000	67900	79500	227000	227000	214000
pma6218	419.1	383.9	3.81	418.13	C21H22O9	[M+H]+	-	O-methylnaringenin C-pentoside	Flavone C-glycosides	346000	314000	314000	331000	292000	250000	242000	284000	252000
pmb0736	493.1	331.8	4.24	492.13	C23H24O12	[M+H]+	-	Tricin 7-O-hexoside	Flavone	1750000	1770000	1750000	1100000	1220000	587000	2350000	2520000	1920000
pmb0565	509.1	347.7	3.36	508.12	C23H24O13	[M+H]+	-	Syringetin 3-O-hexoside	Flavonol	5240000	5510000	6090000	3680000	5500000	7660000	6850000	4910000	5090000
pmb0720	579.1	331.7	4.5	578.13	C26H26O15	[M+H]+	-	Tricin O-malonylhexoside	Flavone	32300000	29200000	29700000	18600000	18500000	15400000	50300000	44100000	31800000
pme1434	371.1	209.2	2.76	372.14	C17H24O9	[M-H]-	C01533	Syringin	Hydroxycinnamoyl derivatives	51100	45600	49100	39100	47800	36100	70000	54500	62200
pme1646	357.1	136.1	5.36	358.14	C20H22O6	[M-H]-	-	Pinoresinol	Hydroxycinnamoyl derivatives	163000	196000	187000	208000	451000	138000	126000	133000	101000
pmb2723	485.1	323.3	3.33	486.14	C21H26O13	[M-H]-	-	4-hydroxycoumarin di-glucoside	Coumarins	39000	37700	30400	32800	9	28600	41600	23000	39000
pmb2586	593.1	549.4	3.49	594.14	C30H26O13	[M-H]-	-	Gallocatechin-catechin	Catechin derivatives	35200	31100	21700	7990	15400	8290	47500	45400	39900
pmb3039	703.1	329.2	5.94	704.14	C35H28O16	[M-H]-	-	Tricin O-oxalic acid O-coumaroyl shikimic acid	Flavone	2590000	2710000	2540000	2420000	2320000	3260000	2450000	2520000	2030000
pme3163	289	78.9	1.08	290.04	C7H15O10P	[M-H]-	-	D-Sedoheptuiose 7-phosphate	Carbohydrates	3030000	3030000	3300000	5010000	4230000	4330000	3080000	4920000	3030000
pme3188	323	78.8	1.23	324.04	C9H13N2O9P	[M-H]-	C00105	Uridine 5'-monophosphate	Nucleotide and its derivates	76500	77500	95600	85300	79500	69400	103000	43200	61400
pmb0854	518.3	459.6	8.74	517.32	C26H48NO7P	[M+H]+	-	LysoPC 18:3	Lipids_Glycerophospholipids	2840000	2900000	2810000	3830000	6170000	4360000	8440000	9460000	9340000
pmb1574	277.2	137.5	8.04	276.21	C18H28O2	[M+H]+	-	Octadecadien-6-ynoic acid	Lipids_Fatty acids	49000	62300	60600	24900	75500	11300	75000	67800	73700
pma0461	277.2	157.4	8.47	276.21	C18H28O2	[M+H]+	-	14,15-Dehydrocrepenynic acid	Lipids_Fatty acids	1350000	1420000	1540000	731000	917000	689000	2430000	2280000	1170000
pmb0037	166.1	121.4	1.45	165.12	C10H15NO	[M+H]+	C06199	Hordenine	Alkaloids	135000	142000	101000	69600	9	89600	85300	77900	58900
pme3009	175	98.9	0.59	174.02	C6H6O6	[M+H]+	-	trans-Citridic acid	Organic acids	431000	396000	438000	474000	420000	367000	426000	405000	337000
pme0004	190.1	84	0.83	189.11	C7H15N3O3	[M+H]+	C02427	L-Homocitrulline	Amino acids	823000	742000	722000	620000	608000	849000	745000	741000	854000
pmb1652	149	121.3	9.64	148.02	C8H4O3	[M+H]+	-	Phthalic anhydride	Others	29700000	27900000	28100000	28600000	24900000	37800000	33700000	32600000	33500000
pme3151	213	78.9	1.23	214.02	C5H11O7P	[M-H]-	-	Deoxyribose 5-phosphate	Nucleotide and its derivates	85500	90000	71700	132000	122000	75300	29100	58900	81800
pme2241	129	84.9	1.65	130.03	C5H6O4	[M-H]-	C02226	Citraconic acid	Organic acids	704000	747000	808000	804000	725000	872000	1350000	451000	316000
pme0491	138	94	1.42	139.03	C6H5NO3	[M-H]-	C01020	6-hydroxynicotinic acid	Nicotinic acid derivatives	226000	186000	201000	173000	170000	118000	329000	154000	217000
pme3207	141	58.7	0.69	142.03	C6H6O4	[M-H]-	-	trans,trans-Muconic acid	Organic acids	92400	98600	97000	147000	101000	75600	75300	133000	49600
pme2111	175	87	0.99	176.03	C6H8O6	[M-H]-	C00072	L-ascorbate	Vitamins	878000	939000	963000	1220000	1210000	935000	1010000	1260000	955000
pme2050	191	131	0.84	192.03	C6H8O7	[M-H]-	C00158	Citric acid	Organic acids	43400000	40800000	40500000	25500000	34700000	35800000	40000000	44400000	44500000
pme2903	137	92.5	3.05	138.03	C7H6O3	[M-H]-	C00156	4-Hydroxybenzoic acid	Organic acids	433000	383000	364000	433000	478000	488000	412000	353000	280000
pme1814	153	108.1	2.57	154.03	C7H6O4	[M-H]-	C00628	2,5-dihydroxybenzoic acid (Gentisic acid)	Benzoic acid derivatives	300000	259000	253000	286000	321000	253000	411000	151000	209000
pme0281	165	121.1	3	166.03	C8H6O4	[M-H]-	C06337	Terephthalic acid	Organic acids	139000	143000	122000	150000	185000	322000	181000	202000	215000
pme3416	177	133.1	3.19	178.03	C9H6O4	[M-H]-	C09263	Esculetin (6,7-dihydroxycoumarin)	Coumarins	199000	211000	189000	229000	193000	130000	239000	289000	187000
pme0270	117	98.9	1.26	116.01	C4H4O4	[M+H]+	C01384	Maleic acid	Organic acids	313000	251000	254000	292000	264000	412000	315000	339000	178000
pme0238	113	94.9	2.24	112.02	C5H4O3	[M+H]+	-	2–furanoic acid	Organic acids	312000	324000	328000	517000	696000	428000	269000	209000	9
pme2601	89	68.9	1.19	90.03	C3H6O3	[M-H]-	C01013	3-Hydroxypropanoic acid	Organic acids	41800	32900	35700	51600	41400	41100	28200	44100	28700
pme2021	105	87.8	1.24	106.03	C3H6O4	[M-H]-	-	DL-Glyceric acid	Organic acids	23600	28900	31900	32700	19500	32300	25500	26300	28600
pme0257	111	111	1	112.03	C4H4N2O2	[M-H]-	C00106	Uracil	Nucleotide and its derivates	303000	406000	367000	417000	386000	265000	368000	250000	242000
pme1730	117	99.8	0.73	118.03	C4H6O4	[M-H]-	-	D-Erythronolactone	Organic acids	36500	39500	53600	38800	35700	28800	23100	59200	26100
pme1830	117	99.9	1.31	118.03	C4H6O4	[M-H]-	C00042	Succinic acid	Organic acids	5720000	5810000	5770000	4910000	5440000	6900000	5350000	5950000	5300000
pme2923	117	99.8	1.37	118.03	C4H6O4	[M-H]-	-	Acetoxyacetic acid	Organic acids	72000	71200	77000	80700	69600	71900	91300	33200	43200
pme0486	117	100	1.32	118.03	C4H6O4	[M-H]-	C02170	Methylmalonic acid	Organic acids	5530000	5550000	5590000	4640000	5090000	6550000	5060000	5540000	5050000
pme0496	122	77.9	1.14	123.03	C6H5NO2	[M-H]-	C00253	Nicotinic acid	Nicotinic acid derivatives	366000	371000	365000	252000	239000	398000	476000	378000	378000
pme1378	282.1	150.1	2.31	281.11	C11H15N5O4	[M+H]+	C02494	1-Methyladenosine	Nucleotide and its derivates	74000	70100	79100	86200	70500	81100	112000	65300	48200
pmc0304	384.1	252.2	2.19	383.11	C14H17N5O8	[M+H]+	-	Succinyladenosine	Nucleotide and its derivates	7380000	7470000	7440000	6370000	6480000	9750000	9990000	7480000	5400000
pma3724	369.1	207.5	3.43	368.11	C17H20O9	[M+H]+	-	1-O-Feruloyl quinic acid	Quinate and its derivatives	579000	595000	615000	603000	759000	343000	749000	360000	324000
pmb0752	369.1	177.5	2.99	368.11	C17H20O9	[M+H]+	C02572	3-O-Feruloyl quinic acid	Quinate and its derivatives	4120000	3620000	3500000	2810000	3750000	2370000	4690000	3930000	3590000
pma6229	451.1	302	3.42	450.12	C21H22O11	[M+H]+	-	Eriodictyol C-hexoside	Flavone C-glycosides	2370000	2440000	2260000	1820000	749000	1310000	3210000	3130000	2690000
pma0294	463.1	313.9	3.98	462.12	C22H22O11	[M+H]+	-	Chrysoeriol 5-O-hexoside	Flavone	1170000	1170000	1110000	2210000	581000	266000	1800000	844000	622000
pmb0689	463.1	301.8	4.69	462.12	C22H22O11	[M+H]+	-	Chrysoeriol C-hexoside	Flavone C-glycosides	4510000	4470000	4410000	3160000	2460000	3500000	4570000	6280000	3640000
pmb0701	463.1	367.8	3.85	462.12	C22H22O11	[M+H]+	-	Chrysoeriol 8-C-hexoside	Flavone C-glycosides	15800000	15600000	16000000	7820000	3430000	3020000	28100000	25500000	26000000
pma0249	479.1	302.8	3.54	478.11	C22H22O12	[M+H]+	-	Selgin 5-O-hexoside	Flavone	237000	165000	222000	558000	146000	9	347000	9	9
pmb2319	482.3	184.5	8.2	481.32	C23H48NO7P	[M+H]+	-	LysoPC 15:0	Lipids_Glycerophospholipids	609000	623000	585000	688000	788000	645000	1290000	1050000	844000
pmb0165	494.3	476.6	8.48	493.32	C24H48NO7P	[M+H]+	-	LysoPC 16:1	Lipids_Glycerophospholipids	212000	237000	199000	103000	124000	161000	193000	206000	153000
pmb0848	494.3	184.6	7.82	493.32	C24H48NO7P	[M+H]+	-	LysoPC 16:1 (2n isomer)	Lipids_Glycerophospholipids	631000	625000	598000	1500000	556000	356000	398000	668000	283000
pmb0608	549.1	301.7	4.52	548.12	C25H24O14	[M+H]+	-	Chrysoeriol O-malonylhexoside	Flavone	1500000	1360000	1500000	482000	731000	497000	3270000	2340000	1480000
pmb0639	757.2	757	3.05	756.21	C33H40O20	[M+H]+	-	8-C-hexosyl-apigenin O-hexosyl-O-hexoside	Flavone C-glycosides	263000	225000	241000	9	9	1330000	9	9	9
pmb2657	289.1	191.2	0.69	290.12	C10H18N4O6	[M-H]-	C03406	Argininosuccinate	Organic acids	98000	106000	102000	107000	111000	135000	82600	88100	61300
pme3478	277.1	146.2	2.75	278.13	C11H22N2O4S	[M-H]-	C00831	Pantetheine	Vitamins	17800	14900	14100	19600	10300	16300	19800	16800	20300
pma6625	405.1	242.2	4.48	406.13	C20H22O9	[M-H]-	-	E-3,4,5'-Trihydroxy-3'-glucopyranosylstilbene	Others	28700	29300	22000	12900	25400	36900	50900	30900	38100
pme3502	429.1	267.1	4.54	430.13	C22H22O9	[M-H]-	C10509	Formononetin 7-O-glucoside (Ononin)	Isoflavone	15100	12200	9250	5490	11800	9	13200	21500	7330
pme1598	463.1	301.1	3.81	464.13	C22H24O11	[M-H]-	-	Hesperetin 5-O-glucoside	Flavanone	110000	132000	113000	161000	153000	57300	65300	118000	63700
pmb3042	491.1	329.3	3.94	492.13	C23H24O12	[M-H]-	-	Tricin 5-O-hexoside	Flavone	197000	238000	240000	319000	248000	157000	184000	198000	129000
pmb2987	487.1	283.2	2.57	488.13	C24H24O11	[M-H]-	-	Acacetin O-acetyl hexoside	Flavone	73900	70400	70900	130000	54400	132000	92100	71900	77200
pmb3000	503.1	341.3	3.94	504.13	C24H24O12	[M-H]-	-	Chrysoeriol O-acetylhexoside	Flavone	26100	21400	28500	9	26200	23500	31800	30300	13600
pmb3032	561.1	329.3	5.63	562.13	C26H26O14	[M-H]-	-	Tricin O-malonyl rhamnoside	Flavone	522000	545000	519000	541000	542000	726000	556000	429000	395000
pmb3053	523.1	329.3	5.95	524.13	C27H24O11	[M-H]-	-	Tricin O-eudesmic acid	Flavone	1620000	1530000	1470000	1610000	1540000	2790000	1040000	1080000	980000
pme3313	259	78.8	0.97	260.03	C6H13O9P	[M-H]-	C00085	D-Fructose 6-phosphate	Carbohydrates	307000	381000	318000	313000	484000	295000	367000	242000	234000
pme3160	259	96.9	0.69	260.03	C6H13O9P	[M-H]-	C00092	D-Glucose 6-phosphate	Carbohydrates	1150000	1200000	1050000	1040000	1610000	974000	1270000	847000	876000
pme1417	161.1	144.2	2.72	160.1	C10H12N2	[M+H]+	C00398	L-Tryptamine	Tryptamine derivatives	50700000	49600000	49200000	30600000	34100000	26200000	62000000	58000000	85000000
pme0249	189.1	97	4.43	188.1	C9H16O4	[M+H]+	C08261	Azelaic Acid	Organic acids	152000	154000	147000	112000	100000	97100	139000	138000	109000
pme0190	187.1	130.1	1.93	188.12	C8H16N2O3	[M-H]-	C02155	N-Glycyl-L-leucine	Amino acid derivatives	16900	17800	18700	21100	16800	18700	25400	16900	20900
pmb0484	104.1	60.2	0.74	103.1	C5H13NO	[M+H]+	C00114	Choline	Cholines	5670000	5940000	5300000	4690000	5660000	5080000	5740000	4890000	5760000
pme0048	108	63.7	0.76	109.02	C2H7NO2S	[M-H]-	C00519	2-Aminoethanesulfinic acid	Organic acids	3100	4690	1690	5890	3070	4420	10700	11300	3360
pme0024	124	79.7	0.75	125.01	C2H7NO3S	[M-H]-	C00245	2-Aminoethanesulfonic acid	Organic acids	153000	159000	170000	9	119000	100000	247000	234000	178000
pme3096	118	73.9	1.32	119.02	C3H5NO4	[M-H]-	C00872	Aminomalonic acid	Organic acids	2720000	2920000	2810000	2400000	2640000	3420000	2550000	2830000	2630000
pmb0197	298.1	166.5	1.14	297.11	C11H15N5O5	[M+H]+	-	N2-methylguanosine	Nucleotide and its derivates	96400	106000	145000	85300	84700	80600	155000	122000	111000
pmb0064	374.1	198.6	2.18	373.1	C15H19NO10	[M+H]+	C04831	DIMBOA glucoside	Others	1800000	1920000	1850000	5330000	766000	428000	1930000	1100000	1600000
pme1640	371.1	267.1	11.63	370.11	C20H18O7	[M+H]+	-	sesamolin	Others	21300000	35900000	33700000	9	1130000	2110000	4520000	1470000	1490000
pme3459	317.2	281.3	7.53	316.2	C20H28O3	[M+H]+	C09066	Caffeyl alcohol	Hydroxycinnamoyl derivatives	127000	126000	130000	97200	81300	99100	118000	100000	93800
pma1108	433.1	271.7	3.73	432.11	C21H20O10	[M+H]+	-	Apigenin C-glucoside	Flavone C-glycosides	4530000	4450000	4180000	3200000	1650000	1990000	6550000	6310000	5940000
pmb0605	433.1	271.7	4.15	432.11	C21H20O10	[M+H]+	C04608	Apigenin 7-O-glucoside (Cosmosiin)	Flavone	1780000	1830000	1870000	1450000	1700000	369000	2280000	2620000	1010000
pme0359	433.1	313.1	3.75	432.11	C21H20O10	[M+H]+	-	Apigenin 5-O-glucoside	Flavone	358000	330000	420000	349000	141000	252000	540000	479000	458000
pme1506	433.1	287	4.9	432.11	C21H20O10	[M+H]+	-	Kaempferol 7-O-rhamnoside	Flavonol	33400	33500	38400	20400	36700	18800	38000	53300	47700
pme1624	433.1	313.1	3.74	432.11	C21H20O10	[M+H]+	C01714	Isovitexin	Flavone C-glycosides	4990000	4670000	4890000	3800000	1780000	2220000	6590000	6450000	6230000
pme2459	449.1	287.1	3.77	448.1	C21H20O11	[M+H]+	C03951	Luteolin 7-O-glucoside (Cynaroside)	Flavone	2080000	2140000	2300000	1380000	1460000	1180000	2890000	4460000	1370000
pma6496	449.1	300	3.47	448.1	C21H20O11	[M+H]+	-	Luteolin 6-C-glucoside	Flavone C-glycosides	685000	761000	651000	553000	257000	389000	945000	978000	816000
pmb0604	449.1	287.6	4.05	448.1	C21H20O11	[M+H]+	C12249	Kaempferol 3-O-glucoside (Astragalin)	Flavonol	96800	90500	67900	59900	49300	57200	59600	115000	57500
pmb0590	461.1	257.4	3.75	460.1	C22H20O11	[M+H]+	-	Acacetin O-glucuronic acid	Flavone	32500	17300	22100	24600	24400	12700	25000	24300	34900
pmd0130	468.3	450.5	7.5	467.3	C22H46NO7P	[M+H]+	-	LysoPC 14:0 (2n isomer)	Lipids_Glycerophospholipids	71400	73300	68000	55600	46500	59700	82000	80900	52200
pmb0735	507.1	331.8	4.17	506.11	C23H22O13	[M+H]+	-	Tricin O-glucuronic acid	Flavone	2020000	1970000	2230000	10900000	9	9	9	9	9
pmb0863	492.3	184.5	7.29	491.3	C24H46NO7P	[M+H]+	-	LysoPC 16:2 (2n isomer)	Lipids_Glycerophospholipids	147000	148000	142000	153000	150000	129000	164000	217000	104000
pme1014	445.3	281	10.71	444.3	C31H40O2	[M+H]+	C00828	Menaquinone (K2)	Vitamins	31800000	60200000	61900000	992000	906000	1650000	1110000	1040000	1200000
pmb0714	689.2	689	3.98	688.2	C33H36O16	[M+H]+	-	Tricin 4'-O-(β-guaiacylglyceryl) ether 5-O-hexoside	Flavonolignan	3010000	3060000	2430000	2820000	2390000	4250000	2090000	3020000	2650000
pmb0723	689.2	329.8	4.92	688.2	C33H36O16	[M+H]+	-	Tricin 4'-O-(β-guaiacylglyceryl) ether O-hexoside	Flavonolignan	9370000	8730000	8970000	8050000	6700000	6860000	9860000	10800000	8830000
pma6518	771.2	177.5	4.26	770.21	C37H38O18	[M+H]+	-	C-pentosyl-chrysoeriol 7-O-feruloylhexoside	Flavone C-glycosides	133000	95800	117000	181000	80000	80700	129000	97800	92100
pmb0678	771.2	753	4.2	770.21	C37H38O18	[M+H]+	-	8-C-hexosyl-apigenin O-feruloylhexoside	Flavone C-glycosides	139000	117000	98200	192000	52900	108000	129000	111000	91000
pmb0662	787.2	733.2	3.67	786.2	C37H38O19	[M+H]+	-	C-hexosyl-luteolin O-feruloylhexoside	Flavone C-glycosides	231000	193000	230000	148000	156000	119000	240000	247000	179000
pmb1312	689.2	688.9	4.38	688.2	C33H36O16	[M+H]+	-	Tricin 4'-O-(β-guaiacylglyceryl) ether 7-O-hexoside	Flavonolignan	1060000	1040000	1010000	820000	754000	521000	1540000	1120000	989000
pmb2940	385.1	223.2	3.15	386.12	C17H22O10	[M-H]-	-	1-O-beta-D-Glucopyranosyl sinapate	Hydroxycinnamoyl derivatives	741000	812000	699000	939000	968000	680000	517000	559000	1180000
pmb3062	385.1	152.2	2.19	386.12	C17H22O10	[M-H]-	-	Eudesmoyl quinic acid	Quinate and its derivatives	43400	45600	36700	41600	42600	36500	36000	42600	38600
pmb2787	293.2	249.9	9.12	294.22	C18H30O3	[M-H]-	-	9-KODE	Lipids_Fatty acids	32800	44100	44400	23300	39200	11100	46600	39500	31300
pme1611	433.1	433	3.72	434.12	C21H22O10	[M-H]-	-	Isohemiphloin	Flavone	22100	24500	23400	25900	19700	21600	29200	29700	27700
pmb3013	519.1	315.3	4.28	520.12	C24H24O13	[M-H]-	-	Isorhamnetin O-acetyl-hexoside	Flavonol	166000	209000	206000	140000	165000	223000	162000	234000	154000
pmb3037	571.1	329.5	5.67	572.12	C27H24O14	[M-H]-	-	Tricin O-malonyl shikimic acid	Flavone	16200	22700	26900	24300	36600	45400	17900	23500	16600
pme2830	140	78.5	0.71	141.02	C2H8NO4P	[M-H]-	-	O-Phosphorylethanolamine	Others	25700	30800	23400	33400	53500	19200	25200	19300	22600
pme2033	133	70.8	0.97	134.02	C4H6O5	[M-H]-	C00497	L(-)-Malic acid	Organic acids	4880000	5300000	5500000	4010000	4380000	5950000	5380000	4540000	6180000
pme2009	149	72.8	1.08	150.02	C4H6O6	[M-H]-	-	L-(+)-Tartaric acid	Organic acids	1300000	1460000	1370000	967000	775000	9	2040000	2430000	1990000
pme2165	155	111	1.08	156.02	C5H4N2O4	[M-H]-	C00295	Orotic acid	Vitamins	363000	294000	335000	439000	377000	479000	406000	425000	544000
pme2380	145	80.8	1.13	146.02	C5H6O5	[M-H]-	-	A-Ketoglutaric acid	Organic acids	968000	855000	919000	1070000	923000	1250000	813000	827000	753000
pme2550	173	137	0.75	174.02	C6H6O6	[M-H]-	C00417	Cis-Aconitic acid	Organic acids	28400	28300	23100	37100	22200	37400	56400	26800	60200
pme1162	169	122.8	1.75	170.02	C7H6O5	[M-H]-	C01424	Gallic acid	Benzoic acid derivatives	223000	193000	176000	249000	184000	103000	231000	144000	80500
pme1184	268.1	151.7	1.68	267.1	C10H13N5O4	[M+H]+	C00330	Deoxyguanosine	Nucleotide and its derivates	622000	588000	606000	901000	662000	494000	773000	571000	327000
pme0264	243.1	127.1	2.08	242.09	C10H14N2O5	[M+H]+	C00214	Thymidine	Nucleotide and its derivates	132000	138000	147000	188000	146000	110000	182000	105000	76800
pme2266	245.1	227.1	3.32	244.09	C10H16N2O3S	[M+H]+	C00120	Biotin	Vitamins	270000	328000	342000	215000	253000	585000	277000	317000	282000
pmb0034	277.1	259.7	1.29	276.1	C10H16N2O7	[M+H]+	C01425	Glu-Glu	Amino acid derivatives	379000	400000	321000	333000	401000	379000	372000	379000	298000
pme2054	205.1	146.1	2.47	204.09	C11H12N2O2	[M+H]+	C00078	L-Tryptophan	Amino acids	9040000	8730000	8520000	8370000	7660000	4700000	9360000	9000000	12300000
pmb0751	321.1	147.5	3.78	320.09	C16H16O7	[M+H]+	-	5-O-p-Coumaroyl shikimic acid	Quinate and its derivatives	42500	37500	34700	34200	29100	9	34700	55000	41200
pme0399	355.1	355.1	2.8	354.1	C16H18O9	[M+H]+	C00852	Chlorogenic acid (3-O-Caffeoylquinic acid)	Quinate and its derivatives	4470000	4480000	4660000	29400000	1210000	9	9	9	9
pma0104	369.1	207.5	3.72	368.09	C20H16O7	[M+H]+	-	N-sinapoyl hydroxycoumarin	Coumarins	5710000	4370000	4820000	3520000	5580000	2160000	4790000	4250000	5090000
pmb0673	403.1	367.7	3.99	402.1	C20H18O9	[M+H]+	-	Apigenin 6-C-pentoside	Flavone C-glycosides	107000	55900	57600	9	64300	9	227000	63900	9
pmb0681	403.1	367.6	4.25	402.1	C20H18O9	[M+H]+	-	Apigenin 8-C-pentoside	Flavone C-glycosides	68300	52900	44100	31800	19800	9	81000	20700	28600
pme0002	611.2	303.1	4.04	610.19	C28H34O15	[M+H]+	C09806	Hesperetin 7-O-neohesperidoside (Neohesperidin)	Flavanone	140000	117000	137000	36000	111000	32000	232000	178000	194000
pme2950	611.2	303	4	610.19	C28H34O15	[M+H]+	C09755	Hesperetin 7-rutinoside (Hesperidin)	Flavanone	115000	99400	105000	29600	52700	18800	152000	110000	126000
pmb1318	457.2	191.5	4.51	456.19	C29H28O5	[M+H]+	-	8-Methyl-2-oxo-4-phenyl-2H-chromen-7-yl 4-(hexyloxy)benzoate	Benzoic acid derivatives	4660000	4840000	5250000	1960000	3980000	2490000	5290000	7070000	5630000
pmb0719	659.2	659	4.45	658.19	C32H34O15	[M+H]+	-	Tricin 4'-O-(syringyl alcohol) ether 5-O-hexoside	Flavonolignan	6070000	5030000	5080000	5270000	5630000	3250000	6600000	5490000	3900000
pmb0680	741.2	740.9	3.94	740.2	C36H36O17	[M+H]+	-	C-hexosyl-apigenin O-p-coumaroylhexoside	Flavone C-glycosides	28400	30900	36900	17200	35200	40000	61000	45300	34300
pmb0782	86.1	56	1.16	85.09	C5H11N	[M+H]+	C01746	Piperidine	Alkaloids	4300000	3830000	3930000	3150000	3060000	3810000	4990000	4080000	4430000
pma2987	142.1	82.9	0.58	141.09	C6H11N3O	[M+H]+	C00860	Histidinol	Others	14300000	14000000	14600000	12400000	13300000	13600000	14800000	13800000	16500000
pme0019	132.1	86	1.2	131.09	C6H13NO2	[M+H]+	C00123	L-Leucine	Amino acids	1220000	1120000	1120000	966000	864000	1320000	1390000	1200000	1280000
pme0274	132.1	76.9	1	131.09	C6H13NO2	[M+H]+	C02378	6-Aminocaproic acid	Organic acids	3460000	3680000	3600000	2990000	2640000	3810000	4210000	3620000	3970000
pme2366	122.1	105	2.39	121.09	C8H11N	[M+H]+	C05332	Phenethylamine	Others	2670000	2780000	2830000	2420000	2140000	1150000	3820000	2980000	4240000
pme3081	169.1	134.1	0.66	168.09	C8H12N2O2	[M+H]+	C00534	4-(Aminomethyl)-5-(hydroxymethyl)-2-methylpyridin-3-ol	Others	8800	7880	7300	16800	7360	6240	9400	11600	6440
pmb2857	308.1	128.2	0.72	309.11	C11H19NO9	[M-H]-	-	L-Glutamic acid O-glucoside	Amino acid derivatives	41200	44100	60500	83700	41800	9	43500	53800	41400
pmb3107	359.1	197.1	2.34	360.11	C15H20O10	[M-H]-	-	Syringic acid O-glucoside	Benzoic acid derivatives	1690000	1580000	1550000	1740000	2290000	2520000	1040000	1120000	1010000
pmb3317	371.1	179.2	1.9	372.11	C16H20O10	[M-H]-	-	Quinacyl syringic acid	Quinate and its derivatives	30300	23200	25700	27200	25900	23700	37400	35700	20500
pmb3031	403.1	328.2	5.16	404.11	C20H20O9	[M-H]-	-	Tricin O-glycerol	Flavone	1410000	1520000	1500000	1530000	1570000	2540000	1020000	1260000	876000
pme1363	662.1	540.1	1.13	663.11	C21H27N7O14P2	[M-H]-	C00003	Nicotinic acid adenine dinucleotide	Nucleotide and its derivates	125000	137000	130000	149000	178000	193000	34700	207000	50300
pmb3026	505.1	301.2	3.91	506.11	C23H22O13	[M-H]-	-	Quercetin O-acetylhexoside	Flavonol	13500	15600	15200	9370	8210	5170	12900	45600	9
pme0062	515.3	497.5	5.77	516.31	C30H44O7	[M-H]-	C08796	Cucurbitacin D	Terpenoids	53200	62200	47900	32000	45000	28500	29600	85500	65400
pme2169	115	97.9	1.11	116.01	C4H4O4	[M-H]-	C00122	Fumaric acid	Organic acids	777000	810000	721000	845000	727000	1030000	1220000	9	9
pme0252	172.1	130	3.41	173.11	C8H15NO3	[M-H]-	C02710	N-Acetyl-l-leucine	Amino acid derivatives	1950000	2070000	1880000	1950000	3000000	2130000	1810000	2030000	1640000
pme2836	178.1	160.1	2.86	177.08	C10H11NO2	[M+H]+	-	5-Hydroxytryptophol	Indole derivatives	321000	302000	272000	299000	155000	292000	345000	288000	343000
pmb0115	225.1	151.4	3.6	224.08	C10H12N2O4	[M+H]+	C02794	3-Hydroxykynurenine	Amino acid derivatives	358000	465000	459000	392000	409000	362000	595000	534000	484000
pme2776	253.1	137.1	1.68	252.09	C10H12N4O4	[M+H]+	C05512	2'-Deoxyinosine	Nucleotide and its derivates	45800	40300	26100	30000	32300	82600	72300	80400	61100
pme2244	190.1	130.1	5.27	189.08	C11H11NO2	[M+H]+	-	3-Indolepropionic acid	Indole derivatives	61900	62400	57500	30800	73300	43500	62300	113000	92100
pme1228	221.1	114.8	1.58	220.08	C11H12N2O3	[M+H]+	C00643	5-Hydroxy-L-tryptophan	Amino acid derivatives	1070000	1060000	1120000	1210000	672000	573000	1350000	1320000	1200000
pme1313	237.1	146.1	2.05	236.08	C11H12N2O4	[M+H]+	C02700	N'-Formylkynurenine	Amino acid derivatives	169000	152000	174000	159000	151000	89000	248000	208000	119000
pme2430	224.1	136.1	2.63	223.08	C11H13NO4	[M+H]+	-	N-Acetyl-L-tyrosine	Amino acid derivatives	170000	187000	182000	177000	177000	265000	199000	193000	141000
pmb1240	503.2	311.8	3.74	502.18	C26H30O10	[M+H]+	-	Phellodensin F	Others	21700000	22700000	21900000	28100000	32200000	18500000	14000000	24200000	16600000
pmd0145	550.4	245.1	9.9	549.38	C28H56NO7P	[M+H]+	-	LysoPC 20:1	Lipids_Glycerophospholipids	33700	32300	27100	48300	32300	32700	48500	63900	28700
pmd0144	550.4	245.1	9.81	549.38	C28H56NO7P	[M+H]+	-	LysoPC 20:1 (2n isomer)	Lipids_Glycerophospholipids	38100	36600	33300	61400	37700	41100	52800	73500	39600
pmb0712	655.2	331.7	3.21	654.18	C29H34O17	[M+H]+	-	Tricin 5-O-hexosyl-O-hexoside	Flavone	7140000	6460000	6260000	4870000	7100000	5870000	7410000	6860000	5230000
pmb0713	655.2	331.7	3.45	654.18	C29H34O17	[M+H]+	-	Tricin 7-O-hexosyl-O-hexoside	Flavone	1960000	1250000	1280000	1540000	1610000	3960000	1840000	1410000	1020000
pmb0716	655.2	331.7	4.11	654.18	C29H34O17	[M+H]+	-	Tricin di-O-hexoside	Flavone	2590000	2620000	2350000	2280000	2100000	2230000	2490000	2470000	1990000
pma0779	725.2	331.7	4.38	724.19	C32H36O19	[M+H]+	-	Tricin O-rhamnosyl-O-malonylhexoside	Flavone	86200	79400	69800	9	9	9	116000	118000	69400
pmb0738	699.2	331.6	4.83	698.18	C34H34O16	[M+H]+	-	Tricin O-sinapoylhexoside	Flavone	1340000	1260000	1310000	506000	844000	144000	1770000	895000	1400000
pme0285	146.1	85.9	0.77	145.09	C5H11N3O2	[M+H]+	C01035	4-Guanidinobutyric acid	Organic acids	17400000	18300000	16900000	16500000	14100000	12000000	29600000	22700000	12100000
pme1828	118.1	118.1	0.78	117.08	C5H11NO2	[M+H]+	C00719	Betaine	Alkaloids	18500000	18100000	18300000	20200000	18800000	18300000	18200000	19600000	17300000
pme0039	118.1	71.8	0.84	117.08	C5H11NO2	[M+H]+	C00183	L-Valine	Amino acids	14800000	14700000	14400000	12500000	10600000	13400000	20400000	14900000	15500000
pme2122	112.1	94.6	0.63	111.08	C5H9N3	[M+H]+	C00388	Histamine	Amino acid derivatives	1870000	1820000	1650000	1860000	1910000	1680000	2290000	1470000	1460000
pme1944	183.1	111	0.79	182.08	C6H14O6	[M+H]+	C00392	D-Mannitol	Alcohols and polyols	687000	682000	676000	430000	403000	513000	657000	655000	841000
pme0181	170.1	124.1	0.72	169.09	C7H11N3O2	[M+H]+	C01152	1-Methylhistidine	Amino acid derivatives	360000	317000	370000	327000	309000	317000	392000	344000	401000
pma0948	138.1	77.2	1.18	137.08	C8H11NO	[M+H]+	-	Hydroxyphenethylamine	Others	721000	689000	739000	992000	621000	1320000	578000	937000	72700
pme1002	138.1	103	1.2	137.08	C8H11NO	[M+H]+	C00483	L-Tyramine	Amino acids	2070000	2090000	2030000	1700000	1580000	3360000	1650000	1770000	2220000
pme3732	244.1	111.4	0.82	243.09	C9H13N3O5	[M+H]+	C00475	Cytidine	Nucleotide and its derivates	5240000	5530000	5200000	4940000	5030000	5620000	6450000	4080000	5150000
pmb2873	214.1	134.2	3.69	215.09	C13H13NO2	[M-H]-	-	3-(2-Naphthyl)-D-alanine	Amino acid derivatives	62500	52400	65200	103000	73800	64300	125000	61400	51900
pmb3041	521.1	329.3	3.74	522.1	C23H22O14	[M-H]-	-	Tricin O-saccharic acid	Flavone	1960000	2070000	1960000	1610000	2300000	1550000	1060000	3410000	1490000
pme0007	174.1	131.1	0.72	175.1	C6H13N3O3	[M-H]-	C00327	L-Citrulline	Amino acids	327000	300000	342000	296000	447000	490000	392000	225000	251000
pme2142	173.1	83.9	0.99	174.1	C7H14N2O3	[M-H]-	C01047	L-Theanine	Amino acids	38700	39200	40900	28100	37400	65200	32800	24000	31000
pme0279	189.1	128.1	0.77	190.1	C7H14N2O4	[M-H]-	C00666	2,6-Diaminooimelic acid	Amino acid derivatives	79300	67700	61800	45500	68400	37100	145000	98300	89500
pme3007	403	159	0.68	404	C9H14N2O12P2	[M-H]-	C00015	Uridine 5’-diphosphate	Nucleotide and its derivates	22200	25200	27000	23000	21600	22800	23700	25900	25100
pme1119	269.1	137	0.8	268.08	C10H12N4O5	[M+H]+	C00294	Inosine	Nucleotide and its derivates	411000	397000	368000	381000	390000	347000	468000	308000	333000
pme1346	300.1	168.1	1.48	299.09	C10H13N5O6	[M+H]+	-	8-Hydroxyguanosine	Nucleotide and its derivates	128000	119000	109000	107000	97000	79600	143000	109000	69700
pme0421	275.1	107	5.34	274.08	C15H14O5	[M+H]+	C00774	Phloretin	Flavanone	13300	17400	15400	12600	10800	9	25500	20800	11700
pme0201	291.1	139.1	2.97	290.08	C15H14O6	[M+H]+	C06562	Catechin	Catechin derivatives	71800	56300	69900	253000	51300	20200	22300	14800	25900
pma0149	341.1	179.4	2.47	340.08	C15H16O9	[M+H]+	C02887	Sinapoyl malate	Organic acids	1750000	1770000	1870000	3720000	1920000	1390000	566000	1260000	2460000
pme1662	287.1	287.1	6.92	286.08	C16H14O5	[M+H]+	C09833	sakuranetin	Flavone	14100	9630	12100	8660	10900	8810	9920	18400	15100
pme2321	303.1	303.1	5.72	302.08	C16H14O6	[M+H]+	C01709	Hesperetin	Flavanone	12700	16100	13300	9	9	23400	8740	14300	11200
pmb0808	353.1	272.8	2.81	352.08	C16H16O9	[M+H]+	-	6,7-dihydroxycoumarin 6-O-quinic acid	Coumarins	222000	215000	207000	175000	289000	224000	203000	182000	172000
pme1502	315.1	300	7.17	314.08	C17H14O6	[M+H]+	-	Kumatakenin	Flavonol	57300	53300	51600	29500	39200	27600	51300	77700	70500
pmb0382	339.1	177.5	3.84	338.08	C19H14O6	[M+H]+	-	O-Feruloyl 4-hydroxylcoumarin	Coumarins	5170000	3810000	4010000	4240000	5490000	3270000	3950000	4520000	4370000
pmb1178	339.1	177.5	3.21	338.08	C19H14O6	[M+H]+	-	O-Feruloyl 2-hydroxylcoumarin	Coumarins	2790000	2520000	2250000	2770000	2500000	2260000	2530000	3000000	2180000
pmb2867	350.1	144.2	1.78	351.1	C16H17NO8	[M-H]-	-	Kynurenic acid O-hexside	Organic acids	236000	219000	211000	379000	126000	97500	296000	162000	235000
pmb3074	337.1	190.9	3.46	338.1	C16H18O8	[M-H]-	-	3-O-p-Coumaroyl quinic acid	Quinate and its derivatives	208000	210000	198000	888000	203000	133000	78700	41000	52700
pmb2938	353.1	191.2	2.91	354.1	C16H18O9	[M-H]-	-	4-O-Caffeoyl quinic acid (criptochlorogenic acid)	Quinate and its derivatives	22600	20000	13000	19200	20800	12100	18400	16800	15300
pme2901	353.1	191.1	2.38	354.1	C16H18O9	[M-H]-	-	1-O-Caffeoyl quinic acid	Quinate and its derivatives	704000	651000	599000	2610000	211000	507000	175000	121000	242000
pmb3024	447.1	327.3	3.37	448.1	C21H20O11	[M-H]-	-	Luteolin C-hexoside	Flavone C-glycosides	17700000	18900000	18000000	17000000	7610000	11400000	24300000	23900000	25100000
pmb3007	475.1	284.5	4.15	476.1	C22H20O12	[M-H]-	-	Chrysoeriol O-glucuronic acid	Flavone	87600	85800	91300	529000	9	9	9	9	9
pme2743	194.1	135.1	3.38	193.07	C10H11NO3	[M+H]+	C05598	N-Phenylacetylglycine	Amino acid derivatives	693000	730000	477000	294000	435000	376000	860000	591000	1330000
pme3437	213.1	154.1	4.44	212.07	C10H12O5	[M+H]+	-	Eudesmic acid (3,4,5-trimethoxybenzoic acid)	Benzoic acid derivatives	53700	43100	34700	9	9	9	103000	48600	9
pmb0818	206.1	147.5	2.48	205.07	C11H11NO3	[M+H]+	C05660	Methoxyindoleacetic acid	Indole derivatives	2560000	2830000	2680000	2560000	2360000	1510000	3150000	2790000	3920000
pme3446	209.1	149.1	4.43	208.07	C11H12O4	[M+H]+	-	Sinapinaldehyde	Hydroxycinnamoyl derivatives	2320000	2090000	2120000	2590000	3260000	1630000	2460000	1250000	1060000
pmb0496	307.2	177.5	2.71	306.17	C15H22N4O3	[M+H]+	C18325	N-Feruloyl agmatine	Phenolamides	442000	497000	426000	536000	359000	308000	654000	283000	533000
pmb0964	366.2	203.5	0.81	365.17	C16H23N5O5	[M+H]+	-	iP7G	Nucleotide and its derivates	511000	575000	592000	835000	614000	443000	509000	475000	553000
pme0524	505.2	127	0.77	504.17	C18H32O16	[M+H]+	-	D(+)-Melezitose	Carbohydrates	85400	91000	86100	131000	132000	84000	49300	101000	80300
pma0702	558.3	264.8	3.59	557.27	C29H39N3O8	[M+H]+	-	"N', N''-disinapoylspermidine"	Phenolamides	517000	588000	499000	571000	814000	486000	507000	465000	588000
pmb0449	162.1	98.3	0.8	161.07	C6H11NO4	[M+H]+	C00956	2-Aminoadipic acid (L-Homoglutamic acid)	Amino acids	772000	604000	702000	577000	544000	566000	602000	698000	768000
pme0037	156.1	110	0.68	155.07	C6H9N3O2	[M+H]+	C00135	L-Histidine	Amino acids	2890000	2740000	2990000	3320000	2350000	2120000	2880000	3300000	3230000
pme1383	170.1	134.1	1.11	169.07	C8H11NO3	[M+H]+	C00314	Pyridoxine	Vitamins	1010000	1020000	980000	1070000	1180000	726000	922000	1160000	1070000
pmc0682	133.1	105	4.16	132.07	C8H8N2	[M+H]+	-	4-Aminoindole	Indole derivatives	2800000	2270000	2580000	3330000	1360000	2110000	2210000	2830000	2540000
pme0289	151.1	78.8	5.92	150.07	C9H10O2	[M+H]+	-	4-Ethylbenzoic acid	Organic acids	32700	20400	20800	22900	19500	36000	36300	16000	30000
pme0030	182.1	136.1	1.13	181.07	C9H11NO3	[M+H]+	C00082	L-(-)-Tyrosine	Amino acids	5440000	5230000	5680000	5890000	5210000	5900000	5090000	5200000	6100000
pme0028	245.1	113	1.19	244.07	C9H12N2O6	[M+H]+	C00299	Uridine	Nucleotide and its derivates	19200000	17400000	20100000	16300000	17700000	18500000	25400000	15500000	21400000
pme1055	207.1	144.1	1.95	208.08	C10H12N2O3	[M-H]-	C00328	L-Kynurenine	Amino acid derivatives	24100	21400	19600	13800	7930	13800	40000	21400	13300
pme0428	237.1	103.1	5	238.08	C12H14O5	[M-H]-	-	3,4,5-Trimethoxycinnamic acid	Hydroxycinnamoyl derivatives	11000	11900	10200	4460	11500	3470	26700	13000	5180
pme1977	173.1	83	3.82	174.09	C8H14O4	[M-H]-	C08278	Suberic acid	Organic acids	62800	61100	55700	56400	9	9	81400	9	42100
pme3440	273.1	137.1	5.3	272.07	C15H12O5	[M+H]+	C08578	Butein	Flavanone	57900	57100	51200	44900	56600	87300	63000	49400	35100
pme1175	282.1	150.1	1.47	283.09	C10H13N5O5	[M-H]-	C00387	Guanosine	Nucleotide and its derivates	7020000	7210000	6680000	6170000	5520000	8050000	8910000	6020000	7020000
pmb3088	421.1	241.2	0.69	422.08	C12H23O14P	[M-H]-	C00689	Trehalose 6-phosphate	Carbohydrates	89800	83900	82400	111000	120000	71900	54000	60100	54900
pme3464	285.1	164	6.81	286.08	C16H14O5	[M-H]-	C05334	Isosakuranetin (4'-Methylnaringenin)	Flavanone	1800	1540	1670	1490	1290	1250	1190	2880	1830
pmd0160	452.3	255.3	8.55	453.29	C21H44NO7P	[M-H]-	-	LysoPE 16:0 (2n isomer)	Lipids_Glycerophospholipids	1740000	1700000	1680000	3700000	6130000	5830000	8590000	4720000	7530000
pma6647	625.2	463.6	3.49	624.17	C28H32O16	[M+H]+	-	C-hexosyl-chrysoeriol O-hexoside	Flavone C-glycosides	81600	138000	90600	109000	42000	87900	123000	154000	158000
pmb0623	625.2	398.1	2.95	624.17	C28H32O16	[M+H]+	-	6-C-hexosyl chrysoeriol O-hexoside	Flavone C-glycosides	397000	453000	352000	335000	156000	161000	428000	468000	640000
pmb0475	671.2	671	2.83	670.17	C29H34O18	[M+H]+	-	Gallic acid O-feruloyl-O-hexosyl-O-hexoside	Hydroxycinnamoyl derivatives	339000	295000	210000	221000	245000	327000	244000	268000	239000
pmb2970	625.2	463.3	2.29	626.18	C28H34O16	[M-H]-	-	Hesperetin O-hexosyl-O-hexoside	Flavanone	25600	32400	18700	17700	28100	31900	36800	34200	31200
pmb0493	277.2	260.8	2.55	276.16	C14H20N4O2	[M+H]+	-	N'-p-Coumaroyl agmatine	Phenolamides	91900	99100	81300	63500	86200	9	124000	141000	53500
pmb1912	474.2	327.8	2.42	473.17	C20H23N7O7	[M+H]+	C00234	10-Formyl-THF	Others	1500000	1750000	1740000	1290000	1630000	963000	858000	1410000	3540000
pmd0136	524.4	507.4	9.69	523.36	C26H54NO7P	[M+H]+	-	LysoPC 18:0	Lipids_Glycerophospholipids	84100	87000	90900	140000	287000	137000	432000	508000	349000
pme2651	742.1	620.2	1.22	743.08	C21H28N7O17P3	[M-H]-	C00006	NADP	Others	331000	281000	347000	411000	336000	531000	106000	342000	212000
pmb0423	195.1	177.5	3.19	194.06	C10H10O4	[M+H]+	-	Hydroxy-methoxycinnamate	Hydroxycinnamoyl derivatives	2020000	2080000	2200000	3300000	2400000	1810000	1550000	1710000	2200000
pmb0813	176.1	133.5	4.34	175.06	C10H9NO2	[M+H]+	-	1-Methoxyindole-3-carbaldehyde	Indole derivatives	398000	384000	401000	205000	315000	273000	644000	298000	327000
pme2607	192.1	114.9	3.04	191.06	C10H9NO3	[M+H]+	C05635	5-Hydroxyindole-3-acetic acid	Indole derivatives	108000	82400	78900	53300	9	69200	89600	86900	137000
pma6599	207.1	147.4	3.21	206.06	C11H10O4	[M+H]+	-	6-Hydroxymethylherniarin	Hydroxycinnamoyl derivatives	3240000	3060000	2960000	2560000	1940000	2720000	4900000	2620000	2130000
pme0355	255.1	199.1	4.89	254.06	C15H10O4	[M+H]+	C10208	Daidzein	Isoflavone	82500	80400	79300	74900	57500	81700	77000	96700	66300
pme2136	123.1	123	0.88	122.06	C4H10O4	[M+H]+	-	DL-threitol	Alcohols and polyols	207000	193000	217000	198000	137000	199000	206000	290000	226000
pme1936	114.1	114	0.57	113.06	C4H7N3O	[M+H]+	C00791	Creatinine	Organic acids	567000	519000	496000	476000	480000	492000	554000	520000	546000
pme3011	104.1	87	0.77	103.06	C4H9NO2	[M+H]+	C00334	γ-aminobutyric acid	Organic acids	789000	897000	742000	595000	595000	763000	1340000	604000	634000
pme0108	126.1	126.1	1.13	125.06	C5H7N3O	[M+H]+	C02376	5-Methylcytosine	Nucleotide and its derivates	122000	158000	139000	169000	145000	111000	193000	95100	63300
pme0006	116.1	70	0.79	115.06	C5H9NO2	[M+H]+	C00148	L-Proline	Amino acids	1690000	1710000	1640000	1530000	1080000	1380000	2250000	2100000	1560000
pma3649	132.1	86.2	0.99	131.06	C5H9NO3	[M+H]+	C00430	5-Aminolevulinate	Organic acids	3400000	3960000	4190000	3330000	2890000	3890000	4650000	3750000	4290000
pme0174	132.1	72.8	1.29	131.06	C5H9NO3	[M+H]+	-	N-Propionylglycine	Amino acid derivatives	709000	698000	693000	716000	593000	754000	895000	771000	884000
pme3333	153.1	136.1	1.48	152.06	C7H8N2O2	[M+H]+	-	1,4-dihydro-1-Methyl-4-oxo-3-pyridinecarboxamide	Pyridine derivatives	1130000	948000	962000	765000	926000	1130000	1330000	916000	876000
pme0388	183.1	137.1	3.25	182.06	C9H10O4	[M+H]+	C05582	Homovanillic acid	Hydroxycinnamoyl derivatives	266000	249000	282000	226000	284000	291000	226000	265000	327000
pme0237	183.1	137.1	4.63	182.06	C9H10O4	[M+H]+	-	Ethyl 3,4-Dihydroxybenzoate (Ethyl protocatechuate)	Organic acids	85000	86300	92400	89400	85600	91600	96500	114000	85800
pme1637	179.1	146.1	3.86	180.08	C10H12O3	[M-H]-	C00590	Coniferyl alcohol	Hydroxycinnamoyl derivatives	1530000	1670000	1670000	2440000	2450000	1980000	2060000	773000	342000
pmb2620	207.1	192.1	5.49	208.07	C11H12O4	[M-H]-	-	3,4-Dimethoxycinnamic acid	Hydroxycinnamoyl derivatives	402000	417000	420000	297000	267000	221000	473000	387000	291000
pme2702	144.1	102	1.62	145.07	C6H11NO3	[M-H]-	C02946	4-Acetamidobutyric acid	Organic acids	451000	400000	419000	424000	342000	243000	475000	627000	533000
pme3351	144.1	126.1	0.82	145.07	C6H11NO3	[M-H]-	C04076	Allysine(6-Oxo DL-Norleucine)	Amino acid derivatives	62700	82100	80900	83100	95100	85100	114000	84300	57600
pme2129	131.1	68.9	3.51	132.08	C6H12O3	[M-H]-	-	(S)-(-)-2-Hydroxyisocaproic acid	Organic acids	237000	316000	322000	451000	670000	353000	190000	200000	171000
pme3346	131.1	70.8	2.63	132.08	C6H12O3	[M-H]-	-	5-hydroxyhexanoic acid	Organic acids	40800	43300	42800	29400	47500	81200	43900	31000	33600
pme0286	131.1	85	3.48	132.08	C6H12O3	[M-H]-	-	2-Hydroxyisocaproic acid	Organic acids	24600	30000	25600	43100	49100	39300	17000	19600	18200
pme3154	147.1	58.8	1.3	148.07	C6H12O4	[M-H]-	-	(Rs)-Mevalonic acid	Organic acids	281000	353000	279000	258000	333000	9	237000	9	522000
pme2237	181.1	70.8	0.75	182.08	C6H14O6	[M-H]-	C01697	Dulcitol	Alcohols and polyols	1280000	1330000	1260000	591000	608000	526000	2280000	2450000	1790000
pmb0514	348.1	136.4	0.85	347.06	C10H14N5O7P	[M+H]+	C01367	Adenosine 3'-monophosphate	Nucleotide and its derivates	2200000	2090000	2300000	2590000	2350000	2140000	2480000	1550000	1620000
pmb0998	364.1	152.5	1.15	363.06	C10H14N5O8P	[M+H]+	C00144	Guanosine 5'-monophosphate	Nucleotide and its derivates	74900	67700	56600	63700	53600	58500	47300	56500	53700
pma1116	301.1	259.1	3.98	300.06	C16H12O6	[M+H]+	C10098	Kaempferide	Flavonol	133000	105000	138000	84500	130000	22500	205000	168000	146000
pme0364	301.1	286.1	5.73	300.06	C16H12O6	[M+H]+	C04293	Chrysoeriol	Flavone	754000	734000	734000	385000	463000	608000	742000	765000	325000
pmb0160	353.3	261.8	7.53	352.26	C21H36O4	[M+H]+	-	MAG (18:3) isomer5	Lipids_Glycerolipids	3860000	3770000	3720000	3790000	3310000	3370000	4210000	4220000	4200000
pmb1605	353.3	335.8	8.55	352.26	C21H36O4	[M+H]+	-	MAG (18:3) isomer3	Lipids_Glycerolipids	49500000	44800000	47800000	32900000	27000000	36800000	25700000	32600000	30600000
pmb2831	315.1	153.2	2.53	316.08	C13H16O9	[M-H]-	-	Protocatechuic acid O-glucoside	Catechin derivatives	1850000	1560000	1640000	1790000	2090000	2130000	1300000	1130000	1550000
pmb2871	315.1	152.1	1.9	316.08	C13H16O9	[M-H]-	-	2,5-dihydroxy benzoic acid O-hexside	Benzoic acid derivatives	80200000	72400000	76600000	72300000	71200000	68300000	96000000	58200000	79500000
pme1496	267.1	252.1	6.27	268.07	C16H12O4	[M-H]-	C00858	Formononetin (4'-O-methyldaidzein)	Isoflavone	10100	10000	9610	8610	9070	9270	8220	10300	4770
pme3461	301.1	151	5.71	302.08	C16H14O6	[M-H]-	C09756	Homoeriodictyol	Flavanone	17900	16200	14900	16100	18700	11300	16900	14000	10300
pma6558	313.1	298.3	7.23	314.08	C17H14O6	[M-H]-	-	Velutin	Flavone	94400	97300	97000	90300	81700	78300	73500	103000	34600
pmb3894	329.1	314.3	5.86	330.07	C17H14O7	[M-H]-	-	Di-O-methylquercetin	Flavonol	376000	413000	403000	429000	541000	173000	664000	382000	227000
pme3442	477.1	301.1	3.67	478.07	C21H18O13	[M-H]-	-	Quercetin 7-O-β-D-Glucuronide	Flavonol	107000	103000	94000	94000	194000	11900	72100	32200	57900
pme0368	579.2	271.1	3.96	578.16	C27H30O14	[M+H]+	-	Apigenin 7-rutinoside (Isorhoifolin)	Flavone	2310000	2220000	2320000	856000	1890000	658000	3080000	3550000	2430000
pme0333	579.2	271.1	4.02	578.16	C27H30O14	[M+H]+	C12627	Apigenin 7-O-neohesperidoside (Rhoifolin)	Flavone	2350000	2220000	2330000	899000	1780000	576000	3190000	3830000	2430000
pme0370	595.2	287.1	3.83	594.16	C27H30O15	[M+H]+	-	Kaempferol 3-O-rutinoside (Nicotiflorin)	Flavonol	2510000	2530000	2510000	1920000	1650000	2160000	1620000	4620000	1610000
pme1606	595.2	287	3.83	594.16	C27H30O15	[M+H]+	-	Kaempferol 3-O-robinobioside (Biorobin)	Flavonol	2460000	2550000	2360000	1980000	1760000	2110000	1490000	4460000	1480000
pmb0684	655.2	655	4.37	654.16	C32H30O15	[M+H]+	-	C-hexosyl-luteolin O-sinapic acid	Flavone C-glycosides	40200	41800	50300	25600	15900	27600	54500	52700	68100
pme0330	579.2	135	3.97	580.18	C27H32O14	[M-H]-	C09789	Naringenin 7-O-neohesperidoside (Naringin)	Flavanone	21600	21400	22600	8200	24200	15700	20000	17500	17800
pmb0859	522.4	184.5	8.86	521.35	C26H52NO7P	[M+H]+	-	LysoPC 18:1 (2n isomer)	Lipids_Glycerophospholipids	9150000	8730000	9520000	20100000	7300000	8600000	10200000	10700000	6050000
pmb0374	136.1	119.3	1.89	135.05	C5H5N5	[M+H]+	-	Aminopurine	Others	9550000	9630000	9200000	2160000	10600000	1340000	16700000	1570000	19300000
pme0183	152.1	135.1	0.85	151.05	C5H5N5O	[M+H]+	-	2-Hydroxy-6-aminopurine	Nucleotide and its derivates	4320000	4300000	3910000	7360000	4390000	4480000	4110000	2550000	2540000
pmb0800	123.1	80.3	1.49	122.05	C6H6N2O	[M+H]+	C00153	Niacinamide	Vitamins	24500000	24400000	24700000	24400000	23000000	25600000	37200000	15500000	10700000
pme0166	167.1	110	1.98	166.05	C6H6N4O2	[M+H]+	C16358	1-Methylxanthine	Nucleotide and its derivates	106000	78400	104000	110000	123000	76300	73500	112000	53400
pme1266	167.1	124	1.86	166.05	C6H6N4O2	[M+H]+	C16357	3-Methylxanthine	Nucleotide and its derivates	938000	922000	818000	1260000	1270000	693000	765000	1240000	506000
pme1709	138.1	78	3.69	137.05	C7H7NO2	[M+H]+	-	Nicotinic Acid Methyl Ester (Methyl Nicotinate)	Vitamins	372000	334000	369000	165000	166000	246000	297000	296000	293000
pme3576	138.1	91.9	4.01	137.05	C7H7NO2	[M+H]+	C00108	Anthranilic acid	Benzoic acid derivatives	60500	53000	61700	56100	45400	36200	72200	60300	56900
pme1724	137.1	77	6.2	136.05	C8H8O2	[M+H]+	C20645	Methyl benzoate	Benzoic acid derivatives	66300	78100	80600	67100	63900	84200	79100	82700	96200
pme2596	184.1	148.1	1.67	183.05	C8H9NO4	[M+H]+	C00847	4-Pyridoxic acid	Pyridine derivatives	2310000	2140000	2200000	1890000	1610000	1190000	3080000	2460000	2330000
pme0409	199.1	140.1	3.35	198.05	C9H10O5	[M+H]+	C10833	Syringic acid	Hydroxycinnamoyl derivatives	758000	936000	833000	880000	1170000	684000	1010000	738000	597000
pme2723	146.1	118.1	4.49	145.05	C9H7NO	[M+H]+	C08493	Indole-3-carboxaldehyde	Indole derivatives	570000	545000	578000	465000	455000	585000	860000	361000	373000
pme0424	133.1	115	5.83	132.06	C9H8O	[M+H]+	C00903	trans-cinnamaldehyde	Hydroxycinnamoyl derivatives	68600	62700	66800	42500	72000	73100	57100	81900	102000
pme0300	149.1	103	5.22	148.05	C9H8O2	[M+H]+	C00423	Cinnamic acid	Hydroxycinnamoyl derivatives	272000	236000	238000	309000	201000	306000	288000	232000	208000
pme3456	149.1	131	4.12	148.05	C9H8O2	[M+H]+	-	p-Coumaraldehyde	Hydroxycinnamoyl derivatives	606000	558000	623000	652000	956000	453000	644000	276000	200000
pme1424	177.1	177.1	4.59	178.06	C10H10O3	[M-H]-	C02666	Coniferylaldehyde	Hydroxycinnamoyl derivatives	6240000	6540000	6410000	10000000	10300000	6960000	7470000	3150000	1720000
pme1695	223.1	149.1	4.01	224.07	C11H12O5	[M-H]-	C00482	Sinapic acid	Hydroxycinnamoyl derivatives	216000	218000	219000	192000	206000	174000	296000	161000	194000
pme1851	130.1	88	0.93	131.07	C4H9N3O2	[M-H]-	C00300	Creatine	Organic acids	1630000	1810000	1640000	1110000	1870000	939000	1880000	2280000	1710000
pme1408	145.1	127.1	0.74	146.07	C5H10N2O3	[M-H]-	C00064	L-Glutamine	Amino acids	1270000	1310000	1340000	616000	653000	1500000	2020000	1400000	1100000
pme3146	145.1	102	1.38	146.07	C5H10N2O3	[M-H]-	-	Ureidoisobutyric acid	Organic acids	10100	5630	11700	9920	6460	9	8670	11800	7950
pme1711	117.1	99.9	2.09	118.06	C5H10O3	[M-H]-	-	3-Hydroxy-3-methyl butyric acid	Organic acids	294000	286000	303000	341000	240000	254000	336000	311000	264000
pme2256	151.1	70.8	0.73	152.07	C5H12O5	[M-H]-	C01904	D-Arabitol	Alcohols and polyols	79800	90400	79800	62000	58900	42600	110000	118000	84000
pme0075	188.1	102	1.16	189.06	C7H11NO5	[M-H]-	C00624	N-Acetyl-L-glutamic acid	Amino acid derivatives	1080000	1030000	1090000	1120000	1130000	1280000	1190000	1010000	926000
pmb3101	175.1	131.3	2.74	176.07	C7H12O5	[M-H]-	C02504	2-Isopropylmalate	Organic acids	601000	607000	588000	999000	701000	687000	669000	469000	420000
pme0418	165.1	92.9	3.84	166.06	C9H10O3	[M-H]-	C01744	3-(4-Hydroxyphenyl)propionic acid	Hydroxycinnamoyl derivatives	8730000	9870000	10100000	14400000	2010000	2210000	1590000	22200000	14400000
pmc0066	333.1	137	0.67	332.05	C10H13N4O7P	[M+H]+	C06196	2'-Deoxyinosine-5'-monophosphate	Nucleotide and its derivates	2520000	2270000	2560000	5840000	5550000	3080000	2160000	2370000	1370000
pme0163	335.1	122.8	0.79	334.06	C11H15N2O8P	[M+H]+	C00455	β-Nicotinamide mononucleotide	Nucleotide and its derivates	2240000	2240000	2410000	2930000	2890000	1960000	1840000	1570000	1790000
pme0379	271.1	215.1	5.62	270.05	C15H10O5	[M+H]+	C01477	Apigenin	Flavone	214000	207000	198000	162000	130000	136000	148000	212000	136000
pme2898	321.1	153.1	3.53	320.05	C15H12O8	[M+H]+	C02906	Dihydromyricetin	Flavonol	324000	409000	311000	244000	344000	380000	331000	374000	391000
pmb0864	426.3	285.8	7.63	425.25	C19H40NO7P	[M+H]+	-	LysoPE 14:0	Lipids_Glycerophospholipids	83800	81300	79600	66900	113000	163000	176000	137000	128000
pme0376	271.1	151	5.54	272.07	C15H12O5	[M-H]-	C00509	Naringenin	Flavanone	98900	93300	93400	73700	63100	43900	129000	123000	61600
pme2957	271.1	151.1	5.45	272.07	C15H12O5	[M-H]-	C06561	Naringenin chalcone	Flavanone	115000	114000	105000	200000	88300	9	121000	169000	63100
pme3473	271.1	151	5.59	272.07	C15H12O5	[M-H]-	C09614	Butin	Flavone	108000	114000	104000	82100	73100	58800	158000	147000	78900
pme1580	287.1	135.1	5.03	288.06	C15H12O6	[M-H]-	C05631	Eriodictyol	Flavanone	43100	45100	39600	65600	40800	31200	29300	46100	22800
pme1541	283.1	268	6.98	284.07	C16H12O5	[M-H]-	C01470	Acacetin	Flavone	10800	11200	11600	6360	13600	6860	12700	12800	6850
pme1018	613.2	355.5	1.14	612.15	C20H32N6O12S2	[M+H]+	C00127	Glutathione oxidized	Amino acid derivatives	5630000	5120000	5060000	3930000	5660000	5370000	7580000	4910000	2990000
pmb0622	611.2	412.3	2.89	610.15	C27H30O16	[M+H]+	-	C-hexosyl-luteolin O-hexoside	Flavone C-glycosides	1900000	1850000	2010000	2170000	569000	1330000	1870000	2910000	2320000
pme0202	611.2	303	3.56	610.15	C27H30O16	[M+H]+	C05625	Quercetin 3-O-rutinoside (Rutin)	Flavonol	195000	196000	192000	197000	120000	116000	210000	294000	194000
pmb0711	611.2	303.7	3.64	610.15	C27H30O16	[M+H]+	-	Quercetin 7-O-rutinoside	Flavonol	612000	585000	548000	1490000	162000	169000	294000	1050000	301000
pme1539	623.2	314	3.75	624.17	C28H32O16	[M-H]-	-	Isorhamnetin 3-O-neohesperidoside	Flavonol	107000	104000	109000	88800	45800	60400	114000	148000	80600
pme2993	193.1	178.1	4	192.04	C10H8O4	[M+H]+	C01752	Scopoletin (7-Hydroxy-5-methoxycoumarin)	Coumarins	306000	446000	470000	9	283000	452000	459000	417000	255000
pmb0764	144.1	142.9	2.62	143.04	C6H9NOS	[M+H]+	C04294	4-Methyl-5-thiazoleethanol	Others	889000	1040000	979000	1250000	1450000	1300000	1240000	459000	241000
pmb0142	165.1	95.5	5.99	164.05	C9H8O3	[M+H]+	C10945	Caffeic aldehyde	Hydroxycinnamoyl derivatives	2180000	2230000	2150000	1950000	1810000	1990000	2810000	2210000	2170000
pme0422	193.1	134.1	4.03	194.06	C10H10O4	[M-H]-	-	3-Hydroxy-4-methoxycinnamic acid	Hydroxycinnamoyl derivatives	2290000	2410000	2400000	2990000	2810000	2070000	3240000	1560000	1140000
pme0305	193.1	134.1	4.03	194.06	C10H10O4	[M-H]-	C01494	Ferulic acid	Hydroxycinnamoyl derivatives	2160000	2310000	2400000	2840000	2840000	2000000	3100000	1550000	1110000
pme0226	131.1	71.8	0.73	132.05	C4H8N2O3	[M-H]-	C00152	L-Asparagine	Amino acids	579000	661000	614000	378000	1640000	507000	632000	365000	261000
pme1097	134.1	134.1	1.13	135.05	C5H5N5	[M-H]-	C00147	Adenine	Nucleotide and its derivates	3330000	3290000	3230000	4830000	2450000	5210000	2250000	4260000	259000
pme0013	146.1	102.1	0.72	147.05	C5H9NO4	[M-H]-	C00025	L-Glutamic acid	Amino acids	16500000	16400000	16900000	16400000	16800000	20900000	16700000	14900000	15000000
pma6281	145.1	74	0.73	146.06	C6H10O4	[M-H]-	-	Methylglutaric acid	Organic acids	14800	18800	16300	6490	10300	18300	21600	17000	14100
pme3309	145.1	101.1	2.63	146.06	C6H10O4	[M-H]-	-	2-Methylglutaric acid	Organic acids	94100	93300	86000	111000	93700	83300	135000	89300	93700
pme0056	145.1	101	2.63	146.06	C6H10O4	[M-H]-	-	2,3-dimethylsuccinic acid	Amino acid derivatives	107000	108000	101000	122000	107000	69700	142000	112000	113000
pme0245	145.1	80.9	2.63	146.06	C6H10O4	[M-H]-	C06104	Adipic acid	Organic acids	121000	108000	103000	131000	108000	95700	134000	126000	109000
pme0397	173.1	92.9	0.94	174.05	C7H10O5	[M-H]-	C00493	Shikimic acid	Organic acids	525000	358000	288000	314000	372000	485000	421000	268000	295000
pmb2561	190.1	84	2.43	191.06	C7H13NO3S	[M-H]-	C02712	N-Acetylmethionine	Amino acid derivatives	60000	62900	62100	67300	82500	33400	39700	68700	97800
pmb2835	181.1	151.1	4.02	182.06	C9H10O4	[M-H]-	-	Syringaldehyde	Hydroxycinnamoyl derivatives	277000	328000	328000	394000	456000	281000	363000	217000	136000
pme0066	116.1	73.9	0.69	117.05	C3H7N3O2	[M-H]-	C00581	Guanidineacetic acid	Amino acid derivatives	3560	5850	2060	1870	4580	4070	11700	12700	8660
pme0161	118.1	101	0.74	119.06	C4H9NO3	[M-H]-	C00263	L-Homoserine	Amino acids	321000	326000	380000	177000	254000	476000	454000	302000	309000
pmc0281	400.2	136.1	2.05	399.14	C15H21N5O8	[M+H]+	-	Adenosine O-ribose	Nucleotide and its derivates	4360000	4440000	4360000	3460000	4370000	2740000	4170000	3530000	8010000
pme1399	355.2	178.9	8.24	354.15	C21H22O5	[M+H]+	C16417	Xanthohumol	Flavanone	99200	103000	110000	106000	113000	113000	91400	106000	105000
pme3511	287.1	153.1	1.19	288.06	C10H12N2O8	[M-H]-	-	Orotidine	Others	63800	53500	85900	83600	85100	49800	89200	76400	92100
pmb2684	328.1	134.2	1.84	329.05	C10H12N5O6P	[M-H]-	C00575	Cyclic AMP	Nucleotide and its derivates	164000	141000	150000	26200	161000	25200	295000	23200	354000
pme1588	315.1	300.1	5.81	316.06	C16H12O7	[M-H]-	C10084	Isorhamnetin	Flavonol	15600	15200	16000	11300	7390	7410	16000	22000	8070
pmb3064	499.2	173.2	2.45	500.15	C22H28O13	[M-H]-	-	3-O-p-coumaroyl quinic acid O-hexoside	Quinate and its derivatives	19400	20400	21500	25300	5860	44900	14100	15200	17500
pmb3079	300.1	79	1.16	301.06	C8H16NO9P	[M-H]-	C04256	N-Acetylglucosamine 1-phosphate	Others	8650	8590	12000	11700	5960	8790	9	12200	9320
pmb0717	527.2	331.6	4.03	526.15	C27H26O11	[M+H]+	-	Tricin 5-O-β-guaiacylglycerol	Flavonolignan	396000	274000	348000	302000	272000	192000	376000	347000	288000
pmb2922	565.1	323.3	1.12	566.06	C15H24N2O17P2	[M-H]-	C00029	Uridine 5'-diphospho-D-glucose	Nucleotide and its derivates	927000	873000	988000	1100000	1330000	1210000	552000	803000	675000
pme1665	593.2	431.1	3.19	594.16	C27H30O15	[M-H]-	C08064	Isovitexin 7-O-glucoside (Saponarin)	Others	43300	34500	29400	40100	34600	51300	36100	34200	31700
pme2746	784.2	437.2	2.78	785.16	C27H33N9O15P2	[M-H]-	C00016	Flavin adenine dinucleotide (FAD)	Nucleotide and its derivates	326000	343000	297000	335000	380000	441000	268000	303000	213000
pmc0960	544.4	544.4	8.89	543.33	C28H50NO7P	[M+H]+	-	LysoPC 20:4	Lipids_Glycerophospholipids	152000	174000	171000	347000	133000	151000	176000	176000	106000
pma2681	206.1	132.4	2.2	205.04	C10H7NO4	[M+H]+	C02470	Xanthurenic acid	Organic acids	980000	901000	957000	801000	720000	731000	1210000	1140000	952000
pmb1587	207.2	165.5	8.33	206.13	C13H18O2	[M+H]+	-	4-Hydroxy-3,5-diisopropylbenzaldehyde	Benzoic acid derivatives	51700	71200	62000	44500	37700	51100	44800	38200	40900
pme2735	399.2	250.1	0.76	398.14	C15H22N6O5S	[M+H]+	C00019	S-(5'-Adenosyl)-L-methionine	Amino acid derivatives	4500000	4400000	4530000	4780000	4560000	6120000	4000000	5010000	5100000
pma6638	477.2	328	5.27	476.13	C23H24O11	[M+H]+	-	O-methylChrysoeriol 7-O-hexoside	Flavone	377000	342000	358000	248000	239000	108000	423000	571000	393000
pme0012	134.1	74	0.74	133.04	C4H7NO4	[M+H]+	C00049	L-Aspartic acid	Amino acids	356000	329000	338000	142000	159000	587000	449000	309000	360000
pmc0274	167.1	121	1.96	166.03	C6H6N4S	[M+H]+	C16614	6-Methylmercaptopurine	Nucleotide and its derivates	22900000	22600000	23400000	18300000	16300000	16100000	34300000	24200000	23300000
pme3413	147.1	91	5.1	146.04	C9H6O2	[M+H]+	C05851	Coumarin	Coumarins	42600	37400	44700	53400	49900	49000	27500	54000	40900
pme0269	229.2	167.2	6.12	230.15	C12H22O4	[M-H]-	C02678	Dodecanedioic aicd	Organic acids	5020	5300	5160	3900	4910	6250	5830	7190	4570
pmb2933	311.1	149.2	2.19	312.05	C13H12O9	[M-H]-	-	Caftaric acid	Hydroxycinnamoyl derivatives	50200	37800	42200	46700	67400	69400	34900	38100	49300
pme3719	165.1	74.9	0.95	166.05	C5H10O6	[M-H]-	-	D-Xylonic acid	Organic acids	18300000	18700000	18500000	22800000	18300000	12400000	19800000	23200000	17800000
pme1021	177.1	70.8	0.78	178.05	C6H10O6	[M-H]-	C00198	D-(+)-Glucono-1,5-lactone	Carbohydrates	35500	34500	37000	32000	33700	29700	59700	48000	33100
pme2253	177.1	74.8	0.81	178.05	C6H10O6	[M-H]-	C01040	L-Gulonic-γ-lactone	Carbohydrates	466000	497000	465000	292000	330000	371000	635000	523000	658000
pme3705	193.1	72.9	0.72	194.04	C6H10O7	[M-H]-	C00191	D-glucoronic acid	Carbohydrates	740000	651000	675000	622000	688000	550000	567000	864000	683000
pme0543	160.1	116	4.32	161.05	C9H7NO2	[M-H]-	-	Indole-5-carboxylic acid	Indole derivatives	65100	74500	72700	75500	63700	46000	130000	53800	26400
pmb2673	210.1	135.2	1.39	211.05	C9H9NO5	[M-H]-	-	3-(6-Hydroxy-3,4-dioxo-1,5-cyclohexadien-1-yl)-L-alanine	Amino acid derivatives	6930	10200	7420	3610	6010	5870	18100	7050	6460
pmb0889	279.3	201.5	8.91	278.22	C18H30O2	[M+H]+	C08364	Punicic acid	Lipids_Fatty acids	1280000	1450000	1440000	1150000	1170000	601000	2060000	1560000	1150000
pmb0569	509.2	347.6	4.01	508.12	C23H24O13	[M+H]+	-	Syringetin 5-O-hexoside	Flavone	3940000	3670000	3840000	2590000	2270000	2390000	5080000	5540000	4230000
pmb0302	126.1	97.3	3.66	125.02	C2H8NO3P	[M+H]+	C03557	2-Aminoethylphosphonate	Others	366000	383000	385000	379000	362000	432000	491000	359000	266000
pme3422	207.1	192	3.45	208.04	C10H8O5	[M-H]-	C09265	6-Methoxy-7,8-DihydroxyCoumarin	Coumarins	29900	32600	18400	15300	23700	22700	28300	17000	9
pme2589	159.1	58.8	1.17	160.04	C6H8O5	[M-H]-	C00322	Oxoadipic acid	Organic acids	121000	111000	134000	160000	73000	67900	104000	150000	113000
pme2598	167.1	139	2.43	168.04	C8H8O4	[M-H]-	-	3,4-Dihydroxybenzeneacetic acid	Organic acids	83900	84300	85200	114000	116000	139000	110000	68300	93600
pma6516	757.3	450.1	3.47	756.21	C33H40O20	[M+H]+	-	C-hexosyl-apigenin O-hexosyl-O-hexoside	Flavone C-glycosides	4090000	3990000	4460000	2640000	2500000	5160000	2730000	8180000	4460000
pmb0607	463.2	287.7	4.25	462.12	C22H22O11	[M+H]+	-	Chrysoeriol 7-O-hexoside	Flavone	5090000	5210000	5060000	2040000	3030000	1400000	8070000	7450000	4100000
pma6639	479.2	318	4.11	478.11	C22H22O12	[M+H]+	-	Isorhamnetin O-hexoside	Flavonol	1530000	1700000	1590000	947000	810000	1180000	1340000	2910000	1480000
pmb0595	479.2	317.8	4	478.11	C22H22O12	[M+H]+	-	Isorhamnetin 5-O-hexoside	Flavonol	1800000	1740000	1720000	992000	867000	1130000	1530000	3110000	1570000
pmb1466	511.2	331.8	6.28	510.12	C26H22O11	[M+H]+	-	Tricin 4'-O-syringic acid	Flavonolignan	1750000	1740000	1710000	1160000	1460000	2330000	1570000	1020000	787000
pme0122	189.2	84	1.02	188.12	C8H16N2O3	[M+H]+	C02727	N6-Acetyl-L-lysine	Amino acid derivatives	874000	868000	776000	399000	695000	467000	1550000	948000	777000
pmb0802	220.2	202.7	2.28	219.11	C9H17NO5	[M+H]+	C00864	D-Pantothenic acid	Vitamins	20000000	22700000	22000000	17100000	18800000	24100000	23800000	21300000	25200000
pmb2507	213.1	78.9	0.97	214.02	C5H11O7P	[M-H]-	C00672	2-Deoxyribose 1-phosphate	Carbohydrates	282000	314000	296000	498000	588000	265000	9	260000	9
pmb2685	213.1	154.9	1.85	214.02	C5H11O7P	[M-H]-	C00673	2-Deoxyribose 5'-phosphate	Carbohydrates	67300	68700	55200	50500	42000	48600	96800	66900	90900
pme2478	137.1	137	3.05	138.03	C7H6O3	[M-H]-	C16700	Protocatechuic aldehyde	Catechin derivatives	67400	63900	61900	89400	88100	62900	78100	44400	26800
pme0118	110.1	65.9	2.88	111.03	C5H5NO2	[M-H]-	C05942	Pyrrole-2-carboxylic acid	Amino acid derivatives	7190	5470	9780	12100	8690	11600	9380	9	9
pmb2979	549.2	387.3	3.99	550.13	C25H26O14	[M-H]-	-	Hesperetin O-malonylhexoside	Flavanone	69800	65500	65000	56400	93200	61100	39000	78300	40200
pmb0767	302.4	284.9	7.3	301.3	C18H39NO2	[M+H]+	-	D-erythro-Dihydrosphingosine	Others	8290	9180	7980	10400	17200	15400	25200	15300	15800
pmb0108	375.2	137.6	3.43	374.1	C19H18O8	[M+H]+	-	Feruloyl syringic acid	Hydroxycinnamoyl derivatives	51100	68500	70000	93800	59600	59400	63000	84700	61200
pmb0739	659.3	331.9	4.87	658.19	C32H34O15	[M+H]+	-	Tricin O-hexosyl-O-syringin alcohol	Flavone	1830000	1660000	1840000	1560000	1190000	1160000	1530000	3040000	1270000
pma6389	345.2	177.5	6.15	344.09	C18H16O7	[M+H]+	C04444	Ayanin	Flavonol	336000	260000	285000	286000	190000	151000	337000	403000	553000
pmb0774	177.2	160.5	1.55	176.09	C10H12N2O	[M+H]+	C17203	N-hydroxy tryptamine	Tryptamine derivatives	12700000	13400000	13200000	8540000	9570000	2590000	22000000	12900000	21400000
pmb3081	289.1	97	1.09	290	C6H11PO11	[M-H]-	-	Glucarate O-Phosphoric acid	Carbohydrates	3230000	3390000	3920000	5790000	4300000	3760000	2970000	5170000	4060000
pme0109	212.2	166.1	1.22	211.08	C10H13NO4	[M+H]+	C07194	(-)-3-(3,4-Dihydroxyphenyl)-2-methylalanine	Amino acid derivatives	138000	143000	157000	139000	111000	102000	195000	135000	146000
pme0124	173.2	116.1	0.79	172.08	C7H12N2O3	[M+H]+	-	Glycyl-L-proline	Amino acid derivatives	104000	117000	101000	73200	93600	110000	69700	69700	121000
pme0120	118.2	101	0.8	117.08	C5H11NO2	[M+H]+	C00431	5-Aminovaleric acid	Amino acid derivatives	63700	58900	58700	49100	9	39800	74500	50100	57500
pmb0128	213.3	97.3	4.63	212.18	C13H24O2	[M+H]+	-	delta-Tridecalactone	Lipids_Fatty acids	127000	128000	140000	52400	77300	137000	120000	252000	181000
pme3827	198.2	114.9	1.15	197.07	C9H11NO4	[M+H]+	C00355	3,4-Dihydroxy-DL-phenylalanine	Amino acid derivatives	279000	159000	210000	215000	206000	142000	185000	142000	187000
pme0128	159.2	88	0.75	160.08	C6H12N2O3	[M-H]-	C00993	D-Alanyl-D-Alanine	Amino acid derivatives	122000	138000	138000	101000	136000	108000	170000	80700	175000
pma3101	256.2	124	0.8	255.07	C11H13NO6	[M+H]+	C05841	Nicotinate ribonucleoside	Nicotinic acid derivatives	10500000	12600000	10300000	10700000	10900000	6910000	12000000	12300000	12600000
pme1486	457.2	169.1	3.28	458.08	C22H18O11	[M-H]-	C09731	Epigallate catechin gallate (EGCG)	Catechin derivatives	3360000	2410000	1550000	2210000	2070000	1850000	2680000	2770000	1940000
pmb0981	348.2	136.4	1.14	347.06	C10H14N5O7P	[M+H]+	C00020	Adenosine 5'-monophosphate	Nucleotide and its derivates	2700000	3050000	2460000	3190000	3010000	2510000	2150000	3480000	2480000
pma6586	567.3	406	3.99	566.16	C26H30O14	[M+H]+	-	Tricin O-glycerylhexoside	Flavone	2930000	2640000	2650000	2240000	2620000	1530000	3460000	3400000	2680000
pme0137	187.2	127.1	1.17	188.08	C7H12N2O4	[M-H]-	-	Nα-Acetyl-L-glutamine	Amino acid derivatives	511000	496000	515000	573000	504000	327000	515000	603000	538000
pme2988	149.2	107	5.6	148.05	C9H8O2	[M+H]+	C02274	3,4-Dihydrocoumarin	Coumarins	174000	183000	183000	126000	133000	115000	239000	209000	134000
pme2529	163.2	162.9	0.83	164.07	C6H12O5	[M-H]-	C07326	1,5-Anhydro-D-glucitol	Alcohols and polyols	61800	89500	104000	88400	93400	9	81200	121000	85700
pme0516	179.2	87	0.74	180.06	C6H12O6	[M-H]-	C00137	Inositol	Others	725000	673000	676000	619000	609000	562000	861000	1020000	730000
pme0534	195.2	75.1	0.7	196.06	C6H12O7	[M-H]-	C00257	Gluconic acid	Carbohydrates	4150000	3970000	4180000	4870000	4110000	2840000	4530000	4960000	3300000
pma6499	509.3	347.9	3.46	508.12	C23H24O13	[M+H]+	-	Limocitrin O-hexoside	Flavone	7260000	7300000	7080000	4300000	6850000	9190000	8880000	7310000	6070000
pmb0602	509.3	283.6	4.1	508.12	C23H24O13	[M+H]+	-	Syringetin 7-O-hexoside	Flavone	3240000	2920000	3470000	2700000	2170000	2370000	4220000	5160000	3710000
pme2706	153.2	109	2.64	154.03	C7H6O4	[M-H]-	C00196	"2,3-Dihydroxybenzoic acid"	Organic acids	1030000	971000	891000	1110000	1030000	996000	1070000	659000	1030000
pme0133	281.3	120	2.49	280.11	C13H16N2O5	[M+H]+	-	Asp-phe	Amino acid derivatives	55700	69500	75000	67000	51400	49100	65400	56500	51700
pmb0856	480.5	339.9	8.8	479.3	C23H46NO7P	[M+H]+	-	LysoPE 18:1 (2n isomer)	Lipids_Glycerophospholipids	2040000	2090000	2090000	7490000	2500000	2190000	2010000	2340000	1550000
pmb0744	435.3	331.8	5.44	434.1	C24H18O8	[M+H]+	-	Tricin O-phenylformic acid	Flavone	3790000	3850000	3830000	3330000	3180000	5350000	3340000	3430000	2340000
pma6520	835.5	332.2	4.24	834.26	C39H46O20	[M+H]+	-	Tricin 4'-O-(β-guaiacylglyceryl) ether-O-rutinoside	Flavonolignan	94600	75000	61600	110000	51100	69600	59100	97700	63600
pme0113	251.3	84	1.12	250.06	C8H14N2O5S	[M+H]+	C00669	γ-Glu-Cys	Amino acid derivatives	47700	79500	81600	287000	205000	255000	58700	266000	150000
pme2695	311.4	147.1	3.56	312.15	C18H20N2O3	[M-H]-	-	Phe-Phe	Amino acid derivatives	13200	11400	7820	9870	8540	12200	7860	12200	12900
pmb0766	390.4	284.9	6.91	389.1	C21H15N3O5	[M+H]+	-	Azoxystrobin acid	Others	4370	4550	4460	8490	6600	6660	7920	5190	7040
pmb0874	478.6	337.9	8.32	477.29	C23H44NO7P	[M+H]+	-	LysoPE 18:2 (2n isomer)	Lipids_Glycerophospholipids	4400000	4090000	4400000	3850000	2990000	4980000	4200000	4200000	2740000
pme1239	320.4	128.1	1.24	321.1	C11H19N3O6S	[M-H]-	C11347	S-(methyl)glutathione	Amino acid derivatives	51100	56100	54300	73400	51100	51500	47500	68800	46200
pmb1270	851.6	331.9	3.99	850.25	C39H46O21	[M+H]+	-	Tricin 4'-O-(β-guaiacylglyceryl) ether 5-O-hexosyl-O-hexoside	Flavonolignan	356000	359000	386000	371000	359000	455000	418000	365000	365000
pme2447	717.6	520.1	4.32	718.15	C36H30O16	[M-H]-	-	lithospermic acid B	Others	14800	14000	12800	14300	22800	13800	23600	14500	19200
pma2405	280	178.4	2.77	280.15	C15H22NO4+	[M]+	-	Feruloylcholine	Cholines	1410000	1600000	1510000	922000	1790000	812000	2020000	2120000	1850000
pme1777	611	287.7	2.15	611.16	C27H31O16+	[M]+	C08639	Cyanidin 3,5-O-diglucoside (Cyanin)	Anthocyanins	72400	82200	77800	9	9	46800	9	9	307000
pma1840	250	191.3	2.87	250.14	C14H20NO3+	[M]+	-	Coumaroyl choline	Cholines	89600	89000	91300	139000	83400	124000	92300	129000	93100
pme0443	493	331.7	2.87	493.13	C23H25O12	[M]+	-	Malvidin 3-O-galactoside	Anthocyanins	307000	195000	392000	260000	256000	233000	330000	222000	167000
pme0275	115	97.9	1.97	115.04	C5H7O3-	[M-H]-	-	4-Oxopentanoate	Organic acids	57300	76600	81500	73600	79800	56900	57900	68900	66300
pmb0545	477.1	315.6	3.31	477.14	C23H25O11+	[M]+	-	Rosinidin O-hexoside	Anthocyanins	458000	552000	457000	397000	546000	252000	391000	1070000	477000
pma1590	463.1	301.4	3	463.12	C22H23O11+	[M]+	-	Peonidin O-hexoside	Anthocyanins	79300	143000	142000	125000	110000	157000	168000	134000	116000
