# Supplementary material for: Multi-omics analysis reveals the molecular changes accompanying heavy-grazing-induced dwarfing of Stipa grandis
Source: Front Plant Sci. 2022 Oct 4;13:995074. doi: 10.3389/fpls.2022.995074 (PMC9673880; doi:10.3389/fpls.2022.995074)
Supplement: Supplementary file 6 [file Table_6.xls]

## Sheet: NG_vs_HG_KEGG_stat
Supplementary Table S6. KEGG classification of the differentially accumulated metabolites (DAMs)
#Kegg_pathway	ko_id	Cluter_frequency	Genome_frequency	P-value	Corrected_P-value
Flavone and flavonol biosynthesis	ko00944	5 out of 38 13.1578947368421%	18 out of 351 5.12820512820513%	0.0340285	1
Tryptophan metabolism	ko00380	5 out of 38 13.1578947368421%	20 out of 351 5.6980056980057%	0.0522334	1
Phenylpropanoid biosynthesis	ko00940	5 out of 38 13.1578947368421%	21 out of 351 5.98290598290598%	0.0631507	1
Stilbenoid, diarylheptanoid and gingerol biosynthesis	ko00945	1 out of 38 2.63157894736842%	1 out of 351 0.284900284900285%	0.108262	1
Styrene degradation	ko00643	1 out of 38 2.63157894736842%	1 out of 351 0.284900284900285%	0.108262	1
Linoleic acid metabolism	ko00591	1 out of 38 2.63157894736842%	1 out of 351 0.284900284900285%	0.108262	1
Renal cell carcinoma	ko05211	1 out of 38 2.63157894736842%	1 out of 351 0.284900284900285%	0.108262	1
Serotonin receptor agonists/antagonists	ko07211	1 out of 38 2.63157894736842%	1 out of 351 0.284900284900285%	0.108262	1
Galactose metabolism	ko00052	2 out of 38 5.26315789473684%	6 out of 351 1.70940170940171%	0.12952	1
African trypanosomiasis	ko05143	1 out of 38 2.63157894736842%	2 out of 351 0.56980056980057%	0.205079	1
Phosphotransferase system (PTS)	ko02060	2 out of 38 5.26315789473684%	9 out of 351 2.56410256410256%	0.253143	1
Fructose and mannose metabolism	ko00051	1 out of 38 2.63157894736842%	3 out of 351 0.854700854700855%	0.291632	1
Indole alkaloid biosynthesis	ko00901	1 out of 38 2.63157894736842%	3 out of 351 0.854700854700855%	0.291632	1
Pyruvate metabolism	ko00620	1 out of 38 2.63157894736842%	3 out of 351 0.854700854700855%	0.291632	1
Pathways in cancer	ko05200	1 out of 38 2.63157894736842%	3 out of 351 0.854700854700855%	0.291632	1
Biosynthesis of phenylpropanoids	ko01061	5 out of 38 13.1578947368421%	34 out of 351 9.68660968660969%	0.300574	1
Biosynthesis of alkaloids derived from shikimate pathway	ko01063	3 out of 38 7.89473684210526%	18 out of 351 5.12820512820513%	0.307056	1
Neuroactive ligand-receptor interaction	ko04080	2 out of 38 5.26315789473684%	11 out of 351 3.13390313390313%	0.3383	1
Phenylalanine metabolism	ko00360	2 out of 38 5.26315789473684%	11 out of 351 3.13390313390313%	0.3383	1
Inflammatory mediator regulation of TRP channels	ko04750	1 out of 38 2.63157894736842%	4 out of 351 1.13960113960114%	0.368983	1
Citrate cycle (TCA cycle)	ko00020	1 out of 38 2.63157894736842%	4 out of 351 1.13960113960114%	0.368983	1
Pentose and glucuronate interconversions	ko00040	1 out of 38 2.63157894736842%	4 out of 351 1.13960113960114%	0.368983	1
Gap junction	ko04540	1 out of 38 2.63157894736842%	4 out of 351 1.13960113960114%	0.368983	1
Synaptic vesicle cycle	ko04721	1 out of 38 2.63157894736842%	4 out of 351 1.13960113960114%	0.368983	1
Oxidative phosphorylation	ko00190	1 out of 38 2.63157894736842%	4 out of 351 1.13960113960114%	0.368983	1
Polycyclic aromatic hydrocarbon degradation	ko00624	1 out of 38 2.63157894736842%	4 out of 351 1.13960113960114%	0.368983	1
Degradation of aromatic compounds	ko01220	2 out of 38 5.26315789473684%	12 out of 351 3.41880341880342%	0.380047	1
Serotonergic synapse	ko04726	1 out of 38 2.63157894736842%	5 out of 351 1.42450142450142%	0.438086	1
Biosynthesis of terpenoids and steroids	ko01062	1 out of 38 2.63157894736842%	5 out of 351 1.42450142450142%	0.438086	1
Pentose phosphate pathway	ko00030	1 out of 38 2.63157894736842%	5 out of 351 1.42450142450142%	0.438086	1
Biosynthesis of alkaloids derived from terpenoid and polyketide	ko01066	1 out of 38 2.63157894736842%	5 out of 351 1.42450142450142%	0.438086	1
Thiamine metabolism	ko00730	1 out of 38 2.63157894736842%	5 out of 351 1.42450142450142%	0.438086	1
Flavonoid biosynthesis	ko00941	3 out of 38 7.89473684210526%	24 out of 351 6.83760683760684%	0.494373	1
Carbon fixation pathways in prokaryotes	ko00720	1 out of 38 2.63157894736842%	6 out of 351 1.70940170940171%	0.499799	1
cAMP signaling pathway	ko04024	1 out of 38 2.63157894736842%	6 out of 351 1.70940170940171%	0.499799	1
Glucagon signaling pathway	ko04922	1 out of 38 2.63157894736842%	6 out of 351 1.70940170940171%	0.499799	1
Butanoate metabolism	ko00650	1 out of 38 2.63157894736842%	6 out of 351 1.70940170940171%	0.499799	1
Biosynthesis of secondary metabolites - unclassified	ko00999	1 out of 38 2.63157894736842%	7 out of 351 1.99430199430199%	0.554893	1
Lysine biosynthesis	ko00300	1 out of 38 2.63157894736842%	8 out of 351 2.27920227920228%	0.604062	1
Arginine biosynthesis	ko00220	1 out of 38 2.63157894736842%	9 out of 351 2.56410256410256%	0.647927	1
Taste transduction	ko04742	1 out of 38 2.63157894736842%	9 out of 351 2.56410256410256%	0.647927	1
Purine metabolism	ko00230	2 out of 38 5.26315789473684%	20 out of 351 5.6980056980057%	0.661528	1
Arginine and proline metabolism	ko00330	2 out of 38 5.26315789473684%	20 out of 351 5.6980056980057%	0.661528	1
Bile secretion	ko04976	1 out of 38 2.63157894736842%	10 out of 351 2.84900284900285%	0.687046	1
Lysine degradation	ko00310	1 out of 38 2.63157894736842%	10 out of 351 2.84900284900285%	0.687046	1
Two-component system	ko02020	1 out of 38 2.63157894736842%	11 out of 351 3.13390313390313%	0.721921	1
Tyrosine metabolism	ko00350	1 out of 38 2.63157894736842%	11 out of 351 3.13390313390313%	0.721921	1
Alanine, aspartate and glutamate metabolism	ko00250	1 out of 38 2.63157894736842%	11 out of 351 3.13390313390313%	0.721921	1
ABC transporters	ko02010	3 out of 38 7.89473684210526%	33 out of 351 9.4017094017094%	0.72198	1
Biosynthesis of alkaloids derived from histidine and purine	ko01065	1 out of 38 2.63157894736842%	13 out of 351 3.7037037037037%	0.780688	1
Nicotinate and nicotinamide metabolism	ko00760	1 out of 38 2.63157894736842%	13 out of 351 3.7037037037037%	0.780688	1
Carbon metabolism	ko01200	1 out of 38 2.63157894736842%	13 out of 351 3.7037037037037%	0.780688	1
Glycine, serine and threonine metabolism	ko00260	1 out of 38 2.63157894736842%	13 out of 351 3.7037037037037%	0.780688	1
Biosynthesis of plant hormones	ko01070	1 out of 38 2.63157894736842%	15 out of 351 4.27350427350427%	0.827293	1
Cysteine and methionine metabolism	ko00270	1 out of 38 2.63157894736842%	15 out of 351 4.27350427350427%	0.827293	1
Biosynthesis of alkaloids derived from ornithine, lysine and nicotinic acid	ko01064	1 out of 38 2.63157894736842%	16 out of 351 4.55840455840456%	0.846826	1
Pyrimidine metabolism	ko00240	1 out of 38 2.63157894736842%	19 out of 351 5.41310541310541%	0.893384	1
Biosynthesis of secondary metabolites	ko01110	8 out of 38 21.0526315789474%	104 out of 351 29.6296296296296%	0.925065	1
Central carbon metabolism in cancer	ko05230	1 out of 38 2.63157894736842%	23 out of 351 6.55270655270655%	0.934591	1
Metabolic pathways	ko01100	16 out of 38 42.1052631578947%	189 out of 351 53.8461538461538%	0.95625	1
Biosynthesis of antibiotics	ko01130	2 out of 38 5.26315789473684%	44 out of 351 12.5356125356125%	0.967537	1
Microbial metabolism in diverse environments	ko01120	3 out of 38 7.89473684210526%	58 out of 351 16.5242165242165%	0.969458	1
Biosynthesis of plant secondary metabolites	ko01060	2 out of 38 5.26315789473684%	45 out of 351 12.8205128205128%	0.970905	1
Biosynthesis of amino acids	ko01230	1 out of 38 2.63157894736842%	38 out of 351 10.8262108262108%	0.990122	1
