# Supplementary material for: Multi-omics analysis reveals the molecular changes accompanying heavy-grazing-induced dwarfing of Stipa grandis
Source: Frontiers journal article supplement (doi:10.3389/fpls.2022.995074), 2022-10-04
Supplement: Table_1.xlsx [file Table_1.xlsx]

## Sheet: Sheet1
Table S1. Overview of transcriptome profiling
ID	NG_1	NG_2	NG_3	HG_1	HG_2	HG_3	GO	KEGG	KOG	NR	SwissProt	TrEMBL
TRINITY_DN100000_c0_g1	0.487	0.893	0	0	0.455	0	--	--	--	--	--	--
TRINITY_DN100001_c0_g1	0	0	0	0	0	0.423	--	--	--	--	--	--
TRINITY_DN100002_c0_g1	0	0	0	0	0.114	0.24	--	K14513: EIN2; ethylene-insensitive protein 2	At2g10780	gb|AAX95246.1|	--	Q53JQ8_ORYSJ, SubName: Full=Retrotransposon protein, putative, Ty3-gypsy sub-class {ECO:0000313|EMBL:AAX95246.1}; SubName: Full=Retrotransposon protein, putative, Ty3-gypsy subclass {ECO:0000313|EMBL:ABA93480.1};
TRINITY_DN100002_c1_g1	0	0	0	0	0.383	0	--	--	--	--	--	--
TRINITY_DN100003_c0_g1	1.631	0	0	0	0	0	--	--	--	--	--	--
TRINITY_DN100004_c0_g1	0	0	0	0	0.548	0.653	--	--	--	--	--	--
TRINITY_DN100005_c0_g1	0	0	0	0	0	1.671	--	--	--	--	--	--
TRINITY_DN100005_c0_g2	0	0.15	0	0.32	0.176	0	--	--	--	--	--	--
TRINITY_DN100006_c0_g1	0	0	0	0	0	0	--	--	--	--	--	--
TRINITY_DN100007_c0_g1	0	0	0	0	0	1.518	--	--	--	--	--	--
TRINITY_DN100008_c0_g1	0	0.04	0.064	0	0.041	0.096	--	--	--	--	--	--
TRINITY_DN100009_c0_g1	1.263	0	0	0	0	0	--	--	--	--	--	--
TRINITY_DN10000_c0_g1	0	0	0	0	0	0	--	--	--	--	--	--
TRINITY_DN100010_c0_g1	0	0	0.171	0	0	0	GO:0046872,metal ion binding; GO:0070300,phosphatidic acid binding; GO:0035091,phosphatidylinositol binding; GO:0017112,Rab guanyl-nucleotide exchange factor activity	K20523: SH3YL1; SH3 domain-containing YSC84-like protein 1	At3g23270	gb|EMS68323.1|	PRAF1_ARATH, RecName: Full=PH, RCC1 and FYVE domains-containing protein 1 {ECO:0000303|PubMed:11563980}; AltName: Full=Protein Praf4 {ECO:0000303|PubMed:15358268};	A0A1D6RD68_WHEAT, SubName: Full=Uncharacterized protein {ECO:0000313|EnsemblPlants:TRIAE_CS42_1AL_TGACv1_001173_AA0026500.2};
TRINITY_DN100011_c0_g1	1.154	0	0	0	0	0	--	--	--	--	--	--
TRINITY_DN100011_c1_g1	0	0	0	0	0	0	--	--	--	--	--	--
TRINITY_DN100012_c0_g1	0.577	0	0	0	0	0	GO:0000785,chromatin; GO:0000775,chromosome, centromeric region; GO:0008278,cohesin complex; GO:0005737,cytoplasm; GO:0016363,nuclear matrix; GO:0005634,nucleus; GO:0009506,plasmodesma; GO:0005819,spindle; GO:0005524,ATP binding; GO:0003682,chromatin binding; GO:0051301,cell division; GO:0007059,chromosome segregation; GO:0006281,DNA repair; GO:0051321,meiotic cell cycle; GO:0007062,sister chroma…	K06669: SMC3, CSPG6; structural maintenance of chromosome 3 (chondroitin sulfate proteoglycan 6)	At2g27170	ref|XP_020105876.1|	SMC3_ARATH, RecName: Full=Structural maintenance of chromosomes protein 3; Short=SMC protein 3; Short=SMC-3; AltName: Full=Chromosome segregation protein SMC-3; AltName: Full=Cohesin complex subunit SMC-3; AltName: Full=Protein TITAN7;	A0A2H3Z7P7_PHODC, SubName: Full=structural maintenance of chromosomes protein 3 isoform X2 {ECO:0000313|RefSeq:XP_008809407.1};
TRINITY_DN100012_c1_g1	1.015	0	0	0	0	0	--	--	--	--	--	--
TRINITY_DN100013_c0_g1	0	1.003	0	0	0	0	--	--	--	--	--	--
TRINITY_DN100014_c0_g1	0	3.059	0	0	0	0	--	--	--	--	--	--
TRINITY_DN10001_c0_g1	0.915	0	0	0	0	0	--	--	--	--	--	--
TRINITY_DN100020_c0_g1	0.06	0.04	0	0.066	0	0.548	--	--	--	ref|XP_020103071.1|	--	A0A0P0WZW8_ORYSJ, SubName: Full=Os06g0658400 protein {ECO:0000313|EMBL:BAS98958.1}; Flags: Fragment;
TRINITY_DN100020_c1_g1	0	0	0	0	0	0.106	--	--	--	--	--	--
TRINITY_DN100021_c1_g1	3.044	0	0	0	0	0	--	--	--	--	--	--
TRINITY_DN100022_c0_g1	1.363	0	0	0	0	0	--	--	--	--	--	--
TRINITY_DN100024_c1_g1	0.766	0	0	0	0	0	--	--	--	--	--	--
TRINITY_DN100026_c0_g1	0	0.451	0.203	0.179	0.3	0.058	--	--	--	--	--	--
TRINITY_DN100027_c0_g1	2.487	0	0	0	0	0	--	--	--	--	--	--
TRINITY_DN10002_c0_g1	0.169	0	0	0	0	0.183	GO:0005795,Golgi stack; GO:0005871,kinesin complex; GO:0005874,microtubule; GO:0005886,plasma membrane; GO:0009531,secondary cell wall; GO:0005524,ATP binding; GO:0016887,ATPase activity; GO:0008017,microtubule binding; GO:0003777,microtubule motor activity; GO:0090058,metaxylem development; GO:0007019,microtubule depolymerization; GO:0007018,microtubule-based movement; GO:0009834,plant-type seco…	K10393: KIF2_24, MCAK; kinesin family member 2/24	At3g16630	ref|XP_021764069.1|	KN13A_ARATH, RecName: Full=Kinesin-like protein KIN-13A {ECO:0000305}; AltName: Full=AtKINESIN-13A {ECO:0000303|PubMed:15574882, ECO:0000303|PubMed:25232944}; Short=AtKIN13A {ECO:0000303|PubMed:25232944};	A0A0K9RID8_SPIOL, RecName: Full=Kinesin-like protein {ECO:0000256|RuleBase:RU000394};
TRINITY_DN100030_c0_g1	0.229	0	0	0	0	0	--	--	--	--	--	--
TRINITY_DN100030_c0_g2	0	0.14	0	0.302	0	0	--	--	--	gb|POE49457.1|	--	--
TRINITY_DN100031_c0_g1	0	0	0	0	1.84	0	--	--	--	--	--	--
TRINITY_DN100032_c0_g1	0.537	0	0	0	0	0	--	--	--	--	--	--
TRINITY_DN100032_c0_g2	0	0	0	0	0	0	--	--	--	--	--	--
TRINITY_DN100033_c0_g1	0	1.354	0	0	0	0	--	--	--	--	--	--
TRINITY_DN100036_c0_g1	0	0	0	0	0	0	--	--	--	--	--	--
TRINITY_DN100037_c0_g1	0	0.181	0	0	0	0	--	--	--	--	--	--
TRINITY_DN100037_c1_g1	0.249	0.231	0.032	0	0	0.115	--	--	--	--	--	--
TRINITY_DN100038_c0_g1	0.726	0	0	0.094	0	0	--	--	--	--	--	--
TRINITY_DN100038_c0_g2	0	0	0	0	0	0	--	--	--	--	--	--
TRINITY_DN100039_c0_g1	0.527	0	0	0	0	0	--	K13168: SFRS16; splicing factor, arginine/serine-rich 16	At5g55100	gb|OEL36108.1|	--	A0A1E5WFM6_9POAL, SubName: Full=Uncharacterized protein {ECO:0000313|EMBL:OEL36108.1};
TRINITY_DN100040_c0_g1	0.885	1.635	0	0	0	0	--	--	--	--	--	--
TRINITY_DN100040_c1_g1	0.119	0	0.075	0.066	0	0.173	--	--	--	--	--	--
TRINITY_DN100042_c0_g1	0	0	0	0.876	0	0.413	--	--	--	--	--	--
TRINITY_DN100043_c0_g1	0	0	0	0	1.706	0	--	--	--	--	--	--
TRINITY_DN100044_c0_g1	0	0	0	0	0.703	0	--	--	--	--	--	--
TRINITY_DN100045_c0_g1	0	1.424	0.546	0	0	0	--	--	--	--	--	--
TRINITY_DN100048_c0_g1	0	0	0	0	0.052	0.259	--	--	--	--	--	--
TRINITY_DN100049_c0_g1	0.229	0.251	0	0	0	0	GO:0009507,chloroplast; GO:0005829,cytosol; GO:0046872,metal ion binding; GO:0000210,NAD+ diphosphatase activity	K03426: E3.6.1.22, NUDT12, nudC; NAD+ diphosphatase [EC:3.6.1.22]	SPBC1778.03c	gb|POE65615.1|	NUD19_ARATH, RecName: Full=Nudix hydrolase 19, chloroplastic; Short=AtNUDT19; EC=3.6.1.22; AltName: Full=NADH pyrophosphatase NUDT19; Flags: Precursor;	R7QLS5_CHOCR, SubName: Full=Uncharacterized protein {ECO:0000313|EMBL:CDF39452.1};
TRINITY_DN10004_c0_g1	0	0.481	0	0.622	0	0	--	--	--	--	--	--
TRINITY_DN100051_c0_g1	0.657	0	0	0	0	0	GO:0005524,ATP binding; GO:0004674,protein serine/threonine kinase activity; GO:0004842,ubiquitin-protein transferase activity	K04733: IRAK4; interleukin-1 receptor-associated kinase 4 [EC:2.7.11.1]	At2g45910	ref|XP_018684787.1|	PUB33_ARATH, RecName: Full=U-box domain-containing protein 33; AltName: Full=Plant U-box protein 33; Includes: RecName: Full=E3 ubiquitin ligase; EC=2.3.2.27; AltName: Full=RING-type E3 ubiquitin transferase {ECO:0000305}; Includes: RecName: Full=Serine/threonine-protein kinase; EC=2.7.11.-;	A0A2H3YUJ2_PHODC, SubName: Full=U-box domain-containing protein 33-like {ECO:0000313|RefSeq:XP_008804030.1};
TRINITY_DN100054_c0_g1	0	0	0	0.433	0	0	--	--	--	--	--	--
TRINITY_DN100057_c0_g1	0	0	0	0	0	0.432	--	--	--	--	--	--
TRINITY_DN100058_c0_g1	0	0	0	1.055	0	0	--	--	--	--	--	--
TRINITY_DN100059_c0_g1	0	0	0	0	0	1.162	--	--	--	--	--	--
TRINITY_DN10005_c0_g1	0.517	0	0	0	0	0	GO:0005886,plasma membrane; GO:0046872,metal ion binding; GO:0004722,protein serine/threonine phosphatase activity	K17499: PPM1G, PP2CG; protein phosphatase 1G [EC:3.1.3.16]	CE24009	gb|OMO61549.1|	P2C60_ARATH, RecName: Full=Probable protein phosphatase 2C 60; Short=AtPP2C60; EC=3.1.3.16;	A0A1R3GTZ0_COCAP, SubName: Full=Phosphatase 2C (PP2C)-like protein {ECO:0000313|EMBL:OMO61549.1};
TRINITY_DN100060_c0_g1	0	0.17	0	0	0	0	--	--	--	--	--	--
TRINITY_DN100062_c0_g1	0	0.201	0	0.188	0.806	1.364	--	K17866: DPH2; diphthamide biosynthesis protein 2	SPBC17D1.02	ref|XP_017221407.1|	--	A0A1E7EP01_9STRA, SubName: Full=Diphthamide_syn-domain-containing protein {ECO:0000313|EMBL:OEU07661.1};
TRINITY_DN100063_c0_g1	0.458	0	0	0	0	0	GO:0016021,integral component of membrane; GO:0009506,plasmodesma; GO:0022857,transmembrane transporter activity	K14611: SLC23A1_2, SVCT1_2; solute carrier family 23 (nucleobase transporter), member 1/2	At2g05760	gb|ONM01635.1|	NAT1_ARATH, RecName: Full=Nucleobase-ascorbate transporter 1; Short=AtNAT1;	A0A1D6KES3_MAIZE, SubName: Full=Nucleobase-ascorbate transporter 3 {ECO:0000313|EMBL:ONM01635.1};
TRINITY_DN100063_c1_g1	1.373	0	0	0	0	0	--	--	--	--	--	--
TRINITY_DN100064_c0_g1	0	0.16	0	0	0.352	0.231	GO:0005840,ribosome; GO:0003735,structural constituent of ribosome; GO:0006412,translation	K02901: RP-L27e, RPL27; large subunit ribosomal protein L27e	Hs4506623	gb|PKA54431.1|	RL27_PYRST, RecName: Full=60S ribosomal protein L27;	A0A2I0AFW9_9ASPA, SubName: Full=60S ribosomal protein L27-3 {ECO:0000313|EMBL:PKA54431.1};
TRINITY_DN100065_c0_g1	0.04	0.07	0	0.047	0.083	0.154	GO:0005634,nucleus; GO:0047627,adenylylsulfatase activity; GO:0005524,ATP binding; GO:0003677,DNA binding; GO:0046872,metal ion binding; GO:0046983,protein dimerization activity; GO:0006260,DNA replication; GO:0009150,purine ribonucleotide metabolic process; GO:0006355,regulation of transcription, DNA-templated; GO:0006790,sulfur compound metabolic process; GO:0006351,transcription, DNA-templated	--	SPCC18.09c	gb|POE85071.1|	BH140_ARATH, RecName: Full=Transcription factor bHLH140; AltName: Full=Basic helix-loop-helix protein 140; Short=AtbHLH140; Short=bHLH 140; AltName: Full=Transcription factor EN 122; AltName: Full=bHLH transcription factor bHLH140;	--
TRINITY_DN100066_c0_g1	0.418	0.09	0	0	0.196	0.106	GO:0016021,integral component of membrane; GO:0003876,AMP deaminase activity; GO:0046872,metal ion binding; GO:0032264,IMP salvage	K01490: AMPD; AMP deaminase [EC:3.5.4.6]	SPBC106.04	gb|POF12704.1|	AMPD_ORYSJ, RecName: Full=Probable AMP deaminase; EC=3.5.4.6;	A0A061RT29_9CHLO, SubName: Full=Amp deaminase {ECO:0000313|EMBL:JAC73870.1}; Flags: Fragment;
TRINITY_DN100067_c0_g1	0.07	0.03	0.043	0.038	0.041	0.038	--	--	--	--	--	--
TRINITY_DN100068_c0_g1	0	0	0	0	0.651	0	--	--	--	--	--	--
TRINITY_DN100068_c0_g2	0.308	0	0	0	0.889	0	--	--	--	--	--	--
TRINITY_DN100069_c0_g1	0.209	0	0	0	0	0	GO:0005730,nucleolus; GO:0005654,nucleoplasm; GO:0003729,mRNA binding; GO:0051028,mRNA transport	K12881: THOC4, ALY; THO complex subunit 4	SPBC1D7.04c	gb|ONM20553.1|	THO4C_ARATH, RecName: Full=THO complex subunit 4C; AltName: Full=ALYREF homolog 3 {ECO:0000303|PubMed:15299117}; Short=AtALY3 {ECO:0000303|PubMed:15299117};	A0A1D1ZIU6_9ARAE, SubName: Full=mRNA export protein mlo3 {ECO:0000313|EMBL:JAT66848.1};
TRINITY_DN100070_c0_g1	1.781	0	0	0	0	0	--	--	--	--	--	--
TRINITY_DN100071_c0_g1	0	0	0	3.016	0	0	--	--	--	--	--	--
TRINITY_DN100073_c1_g1	0	0	0	0	0	0	--	--	--	--	--	--
TRINITY_DN100074_c0_g1	0	0	4.808	0	0	0	--	--	--	--	--	--
TRINITY_DN100075_c0_g1	0.448	0	0	0.085	0	0	--	--	--	--	--	--
TRINITY_DN100076_c0_g1	0.657	0	0	0	0	0	--	--	--	--	--	--
TRINITY_DN100079_c0_g1	0.388	0	0	0	0	0	--	--	--	--	--	--
TRINITY_DN10007_c0_g1	1.751	0	0	0	0	0	GO:0005777,peroxisome; GO:0016874,ligase activity; GO:0006631,fatty acid metabolic process	--	--	ref|XP_020090054.1|	AAE17_ARATH, RecName: Full=Probable acyl-activating enzyme 17, peroxisomal; EC=6.2.1.-;	A0A2H3XD51_PHODC, SubName: Full=probable acyl-activating enzyme 17, peroxisomal {ECO:0000313|RefSeq:XP_008782050.1};
TRINITY_DN100080_c0_g1	0.06	0.05	0.161	0.433	0.124	0.134	--	--	--	--	--	--
TRINITY_DN100082_c0_g1	0	0	0	0	0	0	--	--	--	--	--	--
TRINITY_DN100085_c0_g1	0	0	4.744	0	1.344	0	--	--	--	--	--	--
TRINITY_DN100087_c0_g1	0	0	0	1.583	0	0	--	--	--	--	--	--
TRINITY_DN100089_c0_g1	0	0.07	0	0.132	0.165	0	--	--	--	--	--	--
TRINITY_DN100089_c0_g2	0.487	0.14	0.118	0	0.165	0.048	--	--	--	--	--	--
TRINITY_DN100090_c0_g1	0	0.431	0	0	0.227	0	--	--	--	--	--	--
TRINITY_DN100091_c0_g1	0	0.552	0	0	0	0.692	--	--	--	--	--	--
TRINITY_DN100091_c1_g1	0.06	0.07	0	0.019	0.124	0.096	--	--	--	--	--	--
TRINITY_DN100092_c0_g1	0.657	0	0	0	0	0	GO:0061630,ubiquitin protein ligase activity	K10592: HUWE1, MULE, ARF-BP1; E3 ubiquitin-protein ligase HUWE1 [EC:2.3.2.26]	At1g55860	gb|PON94002.1|	UPL1_ARATH, RecName: Full=E3 ubiquitin-protein ligase UPL1; Short=Ubiquitin-protein ligase 1; EC=2.3.2.26; AltName: Full=HECT-type E3 ubiquitin transferase UPL1;	A0A0D9XBN6_9ORYZ, SubName: Full=Uncharacterized protein {ECO:0000313|EnsemblPlants:LPERR09G01520.1};
TRINITY_DN100093_c0_g1	0.647	0	0	0	0	0	--	--	--	--	--	--
TRINITY_DN100095_c0_g1	0.05	0.612	0.3	0.641	1.189	0.893	--	--	--	--	--	H3GHN3_PHYRM, SubName: Full=Uncharacterized protein {ECO:0000313|EnsemblProtists:Phyra75459};
TRINITY_DN100099_c0_g1	0	0	2.806	0	0	0	--	--	--	--	--	--
TRINITY_DN10009_c0_g1	4.695	0	0	0	0	0	--	--	--	--	--	--
TRINITY_DN100101_c0_g1	0.109	0	0	0.047	0.186	0.346	--	--	--	ref|XP_005845904.1|	--	E1ZKG5_CHLVA, SubName: Full=Uncharacterized protein {ECO:0000313|EMBL:EFN53802.1};
TRINITY_DN100105_c0_g1	0	1.203	0	0.518	0	0	--	--	--	--	--	--
TRINITY_DN100106_c0_g1	1.731	0	0	0	0	0	--	--	--	--	--	--
TRINITY_DN100107_c0_g1	1.592	0	0	0	0	0	--	--	--	--	--	--
TRINITY_DN100108_c0_g1	0	0	0	0	0	0	--	--	--	--	--	--
TRINITY_DN100109_c0_g1	0	0	0	0.839	0	0	--	--	--	--	--	--
TRINITY_DN10010_c0_g1	0.199	0	0.171	0.16	0.196	0	--	--	--	gb|POF22288.1|	--	A0A0D6RA89_ARACU, SubName: Full=Uncharacterized protein {ECO:0000313|EMBL:JAG98890.1};
TRINITY_DN100110_c0_g1	0	0	0	0	0	0.989	--	--	--	--	--	--
TRINITY_DN100112_c0_g1	0	0	0	0	0	0	--	--	--	--	--	--
TRINITY_DN100113_c0_g1	0	0	0	0.613	0	0	--	--	--	--	--	--
TRINITY_DN100113_c0_g2	0	0.421	0	0	0	0	--	--	--	--	--	--
TRINITY_DN100118_c0_g1	0.338	0	0	0	0	0	--	--	--	--	--	--
TRINITY_DN100118_c1_g1	0.617	0	0	0	0	0	--	--	--	--	--	--
TRINITY_DN100119_c0_g1	0	0	0	0	0	0	--	--	--	--	--	--
TRINITY_DN10011_c0_g1	0	0	0	0	0	0	--	--	--	--	--	--
TRINITY_DN10011_c1_g1	0	0.411	0	0	0	0	--	--	--	--	--	--
TRINITY_DN100120_c0_g1	0	0	1.028	0	0.445	0	--	--	--	--	--	--
TRINITY_DN100121_c0_g1	0	0	0	0	0.217	0	--	--	--	--	--	--
TRINITY_DN100122_c0_g1	0	0	0	0	0.331	0	--	--	--	--	--	--
TRINITY_DN100123_c0_g1	0	0	1.424	0	0	0	--	--	--	--	--	--
TRINITY_DN100123_c0_g2	0	0	0	0	0.672	0	--	--	--	--	--	--
TRINITY_DN100124_c0_g1	0.487	0	0	0	0	0	GO:0005829,cytosol; GO:0005634,nucleus; GO:0005524,ATP binding; GO:0003682,chromatin binding; GO:0003677,DNA binding; GO:0008094,DNA-dependent ATPase activity; GO:0004386,helicase activity; GO:0043044,ATP-dependent chromatin remodeling; GO:0016569,covalent chromatin modification; GO:0007275,multicellular organism development; GO:0010199,organ boundary specification between lateral organs and the …	K11647: SMARCA2_4; SWI/SNF-related matrix-associated actin-dependent regulator of chromatin subfamily A member 2/4 [EC:3.6.4.-]	At2g46020	ref|XP_006648224.1|	BRM_ARATH, RecName: Full=ATP-dependent helicase BRM {ECO:0000303|PubMed:15371304}; EC=3.6.4.12; AltName: Full=Protein BRAHMA {ECO:0000303|PubMed:15371304}; Short=AtBRM {ECO:0000303|PubMed:15371304}; AltName: Full=Protein CHROMATIN REMODELING 2 {ECO:0000303|PubMed:16547115}; Short=AtCHR2 {ECO:0000303|PubMed:16547115};	A0A0E0JUL6_ORYPU, SubName: Full=Uncharacterized protein {ECO:0000313|EnsemblPlants:OPUNC02G00510.1};
TRINITY_DN100125_c0_g1	1.681	0.261	0	0	0	0	--	--	--	--	--	--
TRINITY_DN100128_c0_g1	0.726	0	0	0	0	0	--	--	--	--	--	--
TRINITY_DN10012_c0_g1	0	0	0	0	0.476	0	--	--	--	--	--	--
TRINITY_DN10012_c0_g2	0	0	0	0	0	0	--	--	--	--	--	--
TRINITY_DN100130_c0_g1	0	0	0.535	0	0	0	--	--	--	--	--	--
TRINITY_DN100130_c0_g2	0.189	0.17	0.246	0	0.186	0	--	K14411: MSI; RNA-binding protein Musashi	At2g26180	emb|CDM81614.1|	--	M8BWR4_AEGTA, SubName: Full=Uncharacterized protein {ECO:0000313|EMBL:EMT26248.1, ECO:0000313|EnsemblPlants:EMT26248};
TRINITY_DN100131_c0_g1	0.587	0	0	0.141	0	0	--	--	--	--	--	--
TRINITY_DN100131_c0_g2	0	0	0	0	0	0	--	--	--	--	--	--
TRINITY_DN100132_c0_g1	1.84	1.133	0	0	1.737	0	--	--	--	--	--	--
TRINITY_DN100134_c0_g1	0	0	0	0.066	0.155	0.221	--	K00667: FAS2; fatty acid synthase subunit alpha, fungi type [EC:2.3.1.86]	SPAC4A8.11c	ref|XP_009350202.1|	--	A0A067BPP7_SAPPC, SubName: Full=Uncharacterized protein {ECO:0000313|EMBL:KDO20489.1};
TRINITY_DN100135_c0_g1	0	1.404	0	0	0	0	--	--	--	--	--	--
TRINITY_DN100136_c0_g1	0	0	0	0.641	0	0	--	--	--	--	--	--
TRINITY_DN100136_c1_g1	0	0.431	0	0	0	0	--	--	--	--	--	--
TRINITY_DN100138_c0_g1	0.597	0	0	0	0	0	--	--	--	--	--	--
TRINITY_DN100139_c0_g1	0	0.481	0	1.244	0	0	--	--	--	--	--	--
TRINITY_DN100139_c0_g2	0	0.371	0	0	0	0.231	--	--	--	--	--	--
TRINITY_DN10013_c0_g1	0	0.07	0.043	0.349	0.165	0.048	--	--	--	--	--	--
TRINITY_DN100140_c0_g1	0	0	0	0	1.448	0.893	--	--	--	--	--	--
TRINITY_DN100141_c0_g1	0	0.191	0	0	0.114	0	--	--	--	gb|POE69005.1|	--	--
TRINITY_DN100141_c0_g2	0.497	0.15	0	0	0.093	0	--	--	--	--	--	--
TRINITY_DN100143_c0_g1	0.109	0	0	0	0.724	0	--	--	Hs4557225	--	--	--
TRINITY_DN100144_c0_g1	0	0	0	0	0.703	0	--	--	--	--	--	--
TRINITY_DN100149_c0_g1	0.786	0	0	0	0.186	0	--	--	--	dbj|BAT10368.1|	--	T1LFN5_TRIUA, SubName: Full=Uncharacterized protein {ECO:0000313|EnsemblPlants:TRIUR3_03458-P1};
TRINITY_DN10014_c0_g1	0	1.264	0	0	0	0	--	--	--	--	--	--
TRINITY_DN100151_c0_g1	0	0	0	0	0.124	0.548	--	--	--	--	--	--
TRINITY_DN100152_c0_g1	1.751	0	0	0	0	0	--	--	--	--	--	--
TRINITY_DN100154_c0_g1	0	0	0	0	0.227	0	--	--	SPBC609.04	gb|POE58710.1|	--	A0A150GE32_GONPE, SubName: Full=Uncharacterized protein {ECO:0000313|EMBL:KXZ48094.1};
TRINITY_DN100154_c0_g2	0	0	0	0	1.158	0	--	--	--	--	--	--
TRINITY_DN100154_c0_g3	0	0	0	2.12	0	0	--	--	--	--	--	--
TRINITY_DN100156_c0_g1	0	0	0	0	0	0	--	--	--	--	--	--
TRINITY_DN100157_c0_g1	0	0	0	0	0	0.49	--	--	--	--	--	--
TRINITY_DN100158_c0_g1	0.139	0	1.082	0	0.155	0	--	--	--	--	--	--
TRINITY_DN100158_c0_g2	0.338	0.14	0.257	0.377	0.279	0	--	--	--	--	--	--
TRINITY_DN100159_c0_g1	0.458	0	0	0	0	0	--	--	--	--	--	--
TRINITY_DN100160_c0_g1	0	0	0	0	0	0	--	--	--	--	--	--
TRINITY_DN100161_c0_g1	1.522	0	0	0	0	0	--	--	--	--	--	--
TRINITY_DN100162_c0_g1	0	0	0	0	0	0.845	--	--	--	--	--	--
TRINITY_DN100163_c0_g1	0	0	0	0	0	0	--	--	--	--	--	--
TRINITY_DN100164_c0_g1	0	0	0	0	0	0	--	--	--	--	--	--
TRINITY_DN100167_c0_g1	0	0	0	0	0	0.884	--	--	--	--	--	--
TRINITY_DN100169_c0_g1	0	0.261	0	0.179	0.145	0	GO:0005634,nucleus; GO:0003682,chromatin binding; GO:0042393,histone binding; GO:0003755,peptidyl-prolyl cis-trans isomerase activity; GO:0048440,carpel development; GO:0010338,leaf formation; GO:0010358,leaf shaping; GO:0010305,leaf vascular tissue pattern formation; GO:0009933,meristem structural organization; GO:0009909,regulation of flower development; GO:0031060,regulation of histone methyla…	K12736: PPWD1; peptidylprolyl isomerase domain and WD repeat-containing protein 1 [EC:5.2.1.8]	Hs14727498	gb|ADI87904.1|	CPY71_ARATH, RecName: Full=Peptidyl-prolyl cis-trans isomerase CYP71; Short=PPIase CYP71; EC=5.2.1.8; AltName: Full=Cyclophilin of 71 kDa; AltName: Full=Cyclophilin-71;	E2FRP3_SILLA, SubName: Full=CypX protein {ECO:0000313|EMBL:ADI87904.1}; Flags: Fragment;
TRINITY_DN100170_c0_g1	0	0	0	1.3	0	0	--	--	--	--	--	--
TRINITY_DN100171_c0_g1	0	0	0	0	0	0	--	--	--	--	--	--
TRINITY_DN100173_c0_g1	0	0.391	0	0	0.393	0	--	--	--	--	--	--
TRINITY_DN100175_c0_g1	0	0	0	0	0	0	--	--	--	--	--	--
TRINITY_DN100176_c0_g1	0	0	0	0.113	0	0.298	--	--	--	--	--	--
TRINITY_DN100178_c0_g1	0.567	0	0	0	0	0	GO:0016021,integral component of membrane; GO:0005743,mitochondrial inner membrane; GO:0005739,mitochondrion; GO:0015181,arginine transmembrane transporter activity; GO:0005290,L-histidine transmembrane transporter activity; GO:0015189,L-lysine transmembrane transporter activity; GO:0000064,L-ornithine transmembrane transporter activity; GO:0006844,acyl carnitine transport; GO:0006972,hyperosmoti…	K15109: SLC25A20_29, CACT, CACL, CRC1; solute carrier family 25 (mitochondrial carnitine/acylcarnitine transporter), member 20/29	Hs7657585	ref|XP_004304506.1|	BAC2_ARATH, RecName: Full=Mitochondrial arginine transporter BAC2; AltName: Full=Mitochondrial basic amino acid carrier 2; Short=AtMBAC2;	B9GX17_POPTR, SubName: Full=Mitochondrial substrate carrier family protein {ECO:0000313|EMBL:EEE78265.2};
TRINITY_DN100178_c1_g1	3.462	0	0	0	0	0	--	--	--	--	--	--
TRINITY_DN100179_c0_g1	0	0	0.193	0.094	0	0.24	--	--	--	--	--	--
TRINITY_DN100179_c1_g1	0	0.401	0	0.179	0	0.327	--	--	--	--	--	--
TRINITY_DN100179_c2_g1	0	0	0.664	0	0.465	0	--	--	--	--	--	--
TRINITY_DN100180_c0_g1	0	0	0	0	0	0	--	--	--	--	--	--
TRINITY_DN100182_c0_g1	0	0.572	0	0.886	0	0.279	--	--	YAL034c	--	--	--
TRINITY_DN100183_c0_g1	0.358	0	0.064	0	0.021	0	--	--	--	--	--	--
TRINITY_DN100184_c1_g1	0	0	0.9	0	0	0	--	--	--	--	--	--
TRINITY_DN100185_c0_g1	0	0.481	0	1.244	0	0.596	--	--	--	--	--	--
TRINITY_DN100186_c0_g1	0.418	0	0	0	0	0	GO:0046872,metal ion binding; GO:0004842,ubiquitin-protein transferase activity	K01931: NEUR; protein neuralized [EC:2.3.2.27]	At5g04460	dbj|BAG91347.1|	LUL3_ARATH, RecName: Full=Probable E3 ubiquitin-protein ligase LUL3; EC=2.3.2.27; AltName: Full=Probable RING-type E3 ubiquitin transferase LUL3 {ECO:0000305}; AltName: Full=Protein LOG2-LIKE UBIQUITIN LIGASE 3; AltName: Full=RING finger protein 398;	B7EG50_ORYSJ, SubName: Full=cDNA clone:J023011H14, full insert sequence {ECO:0000313|EMBL:BAG91347.1};
TRINITY_DN100187_c0_g1	0	0	1.971	0	0	0	--	--	--	--	--	--
TRINITY_DN100188_c1_g1	0	0	0	0	0.765	0	--	--	--	--	--	--
TRINITY_DN100189_c0_g1	0	0	0	0	0	0	--	--	--	--	--	--
TRINITY_DN100190_c0_g1	0	0	0	0	0	0	--	--	--	--	--	--
TRINITY_DN100191_c0_g1	0.08	0.14	0	0	0	0	--	--	--	--	--	--
TRINITY_DN100193_c0_g1	0	0.271	0	0.179	0	0	--	--	--	--	--	--
TRINITY_DN100194_c0_g1	0	0	0	0	0	0	--	--	--	gb|POE77724.1|	--	Q6W7J3_ORYSI, SubName: Full=Putative opsin {ECO:0000313|EMBL:AAQ75384.1};
TRINITY_DN100194_c1_g1	0.766	0	0	0	0	0	--	--	--	gb|POE77724.1|	--	Q6W7J3_ORYSI, SubName: Full=Putative opsin {ECO:0000313|EMBL:AAQ75384.1};
TRINITY_DN100195_c0_g1	0	0.361	0	0	0.196	0	--	--	--	--	--	--
TRINITY_DN100196_c0_g1	0	0	0	0.858	0	0	--	--	--	--	--	--
TRINITY_DN100197_c0_g1	0	0.421	0.61	0	0	0	--	--	--	--	--	--
TRINITY_DN100199_c0_g1	0.04	0.03	0.043	0	0.041	0.231	--	--	--	--	--	--
TRINITY_DN100199_c1_g1	0	0.181	0	0	0	0	--	--	--	--	--	--
TRINITY_DN10019_c0_g1	1.731	0	0	0	0	0	--	--	--	--	--	--
TRINITY_DN1001_c0_g1	0.139	0.241	0	0	0	0	--	--	--	gb|POE78605.1|	--	--
TRINITY_DN100200_c0_g1	0	0	0	0.047	0.041	0.125	--	--	--	--	--	--
TRINITY_DN100200_c0_g2	0	0	0	0	0	0.548	--	--	--	--	--	--
TRINITY_DN100201_c0_g1	0	0	0	0	0	0	--	--	--	--	--	--
TRINITY_DN100202_c0_g1	0	0	0	0.292	0	0	--	--	--	--	--	--
TRINITY_DN100202_c0_g2	0	0	1.135	0	0	0.48	--	--	--	--	--	--
TRINITY_DN100204_c0_g1	0	0	0	0.33	0	0	--	--	--	gb|POE48672.1|	--	--
TRINITY_DN100204_c1_g1	0	0	0	2.761	0	0	--	--	--	--	--	--
TRINITY_DN100205_c0_g1	0	0	0	0	0.641	0.375	--	--	--	--	--	--
TRINITY_DN100206_c0_g1	0	0	0	1.875	0	0	--	--	--	--	--	--
TRINITY_DN100207_c0_g1	0	0	0	0	1.003	3.823	--	--	--	--	--	--
TRINITY_DN100208_c0_g1	0	0	0	0.33	0	0.154	--	K01081: E3.1.3.5; 5'-nucleotidase [EC:3.1.3.5]	7303718	gb|POF15375.1|	--	A0A150H410_GONPE, SubName: Full=Uncharacterized protein {ECO:0000313|EMBL:KXZ56803.1};
TRINITY_DN100209_c0_g1	0	0	0	0	0	0	--	--	--	--	--	--
TRINITY_DN100210_c0_g1	0.766	0	0	0	0	0	--	--	--	--	--	--
TRINITY_DN100212_c0_g1	0	0.11	0.086	0	0.072	0	--	--	--	--	--	--
TRINITY_DN100213_c0_g1	0	0	0	0.358	0	0	--	--	--	--	--	--
TRINITY_DN100214_c0_g1	0.637	0	0	0	0	0	--	--	--	--	--	--
TRINITY_DN100215_c0_g1	0	0	0	0.132	0	0.403	--	--	--	--	--	M0UB42_MUSAM, SubName: Full=Uncharacterized protein {ECO:0000313|EnsemblPlants:GSMUA_AchrUn_randomP21340_001};
TRINITY_DN100216_c0_g1	0	0	0	0	1.934	0	--	--	--	--	--	--
TRINITY_DN100217_c0_g1	0	0.301	0	0.792	0	0	--	--	--	--	--	--
TRINITY_DN100218_c0_g1	0	1.424	0	0	0	0	--	--	--	--	--	--
TRINITY_DN10021_c0_g1	0.597	0	0	0	0	0	--	K17569: GPATCH2; G patch domain-containing protein 2	At3g09850	gb|OAY62639.1|	--	A0A199UD20_ANACO, SubName: Full=Zinc finger CCCH-type with G patch domain-containing protein {ECO:0000313|EMBL:OAY62639.1};
TRINITY_DN100220_c0_g1	0.676	0	0	0	0	0	--	--	--	--	--	--
TRINITY_DN100221_c0_g1	0	0	0	0.952	0	0	--	--	--	--	--	--
TRINITY_DN100223_c0_g1	0	0	0	0.283	0	0.259	--	--	--	--	--	--
TRINITY_DN100225_c0_g1	0	0	0	0	0	0	--	--	--	--	--	--
TRINITY_DN100226_c0_g1	0	0.08	0.246	0.17	0.031	0.058	--	--	--	--	--	--
TRINITY_DN100227_c0_g1	0	0	0	0	0	0	--	--	--	--	--	--
TRINITY_DN100227_c0_g2	0	0.471	0	0	0.476	0	--	--	--	--	--	--
TRINITY_DN100228_c0_g1	0	0.16	0	0	0.093	0	--	--	--	--	--	--
TRINITY_DN100228_c0_g2	0	0	0	0	0	0	--	--	--	--	--	--
TRINITY_DN100229_c0_g1	0.099	0	0	0.198	0	0.106	--	--	--	--	--	--
TRINITY_DN10022_c0_g1	0.04	0.13	0.054	0.085	0	0	--	--	--	--	--	--
TRINITY_DN100231_c0_g1	0	1.314	0	0	0	0	--	--	--	--	--	--
TRINITY_DN100232_c1_g1	0	0	0	0	0	0	--	--	--	--	--	--
TRINITY_DN100237_c0_g1	0.06	0.03	0	0.104	0.258	0.096	--	--	--	--	--	--
TRINITY_DN100238_c0_g1	0	0	0	0.302	0	0.173	--	--	--	--	--	--
TRINITY_DN100238_c0_g2	0	0	0.386	0	0.279	0	--	--	--	--	--	--
TRINITY_DN10023_c0_g1	0	0.09	0	0.123	0	0	--	--	--	--	--	--
TRINITY_DN100240_c0_g1	0	0.762	0	0	0	0	--	--	--	--	--	--
TRINITY_DN100241_c0_g1	0.368	0	0	0	0	0	--	--	--	--	--	--
TRINITY_DN100242_c0_g1	0	0	0	0	0.724	0.893	--	--	--	--	--	--
TRINITY_DN100243_c0_g1	0	0.652	0	0	0	0	--	--	--	--	--	--
TRINITY_DN100243_c0_g2	0	0	0	0	0.703	0	--	--	--	--	--	--
TRINITY_DN100244_c0_g1	0	0	0	1.065	0	2.065	--	--	--	--	--	--
TRINITY_DN100247_c0_g1	0	0	0	0.311	0.155	0	--	--	--	--	--	--
TRINITY_DN10024_c0_g1	0	0.441	0.825	0	0	0	--	--	--	--	--	--
TRINITY_DN100250_c0_g1	0.259	0	0	0	0	0	--	--	--	--	--	--
TRINITY_DN100254_c0_g1	0	0.13	0	0	0	0	--	--	--	--	--	--
TRINITY_DN100254_c1_g1	1.194	1.324	0	0	0	0	--	--	--	--	--	--
TRINITY_DN100255_c0_g1	0.905	0	0	0	0	0	--	--	--	--	--	--
TRINITY_DN100255_c0_g2	0	0	0	0	0	0	--	--	--	--	--	--
TRINITY_DN100255_c0_g3	0.517	0	0	0	0	0	GO:0005737,cytoplasm; GO:0005634,nucleus; GO:0019005,SCF ubiquitin ligase complex; GO:0031625,ubiquitin protein ligase binding; GO:0043161,proteasome-mediated ubiquitin-dependent protein catabolic process; GO:0042787,NA; GO:0030162,regulation of proteolysis	K04733: IRAK4; interleukin-1 receptor-associated kinase 4 [EC:2.7.11.1]	At1g14330	ref|XP_020702817.1|	SKI11_ARATH, RecName: Full=F-box/kelch-repeat protein SKIP11; AltName: Full=SKP1-interacting partner 11;	A0A2I0W9R5_9ASPA, SubName: Full=F-box/kelch-repeat protein SKIP11 {ECO:0000313|EMBL:PKU72402.1};
TRINITY_DN100257_c0_g1	0	0	0.535	0	0	0	--	--	--	--	--	--
TRINITY_DN100258_c0_g1	0	0	0	0	0	0.817	--	--	--	--	--	--
TRINITY_DN100259_c0_g1	1.93	0	0	0	0	0	--	--	--	--	--	--
TRINITY_DN10025_c0_g1	0.388	0	0	0	0	0	--	K01184: E3.2.1.15; polygalacturonase [EC:3.2.1.15]	At3g57790_1	gb|OAY80519.1|	--	A0A199VTZ7_ANACO, SubName: Full=Putative polygalacturonase {ECO:0000313|EMBL:OAY80519.1};
TRINITY_DN10025_c0_g2	0.05	0	0	0	0	0	--	--	At3g57790_1	ref|XP_020692109.1|	--	A0A2I0VN90_9ASPA, SubName: Full=Putative polygalacturonase {ECO:0000313|EMBL:PKU64867.1};
TRINITY_DN100261_c0_g1	0.458	0	0	0	0	0	--	--	--	--	--	--
TRINITY_DN100264_c0_g1	0.279	0	0.086	0	0	0	--	--	--	--	--	--
TRINITY_DN100265_c0_g1	3.452	0	0	0	0	0	--	--	--	--	--	--
TRINITY_DN100266_c0_g1	0	0	0	0.302	0.496	0.288	--	--	--	--	--	--
TRINITY_DN100267_c0_g1	0.358	0	0	0	0	0	--	--	--	--	--	--
TRINITY_DN100267_c1_g1	0.836	0	0	0	0	0	--	--	--	--	--	--
TRINITY_DN100268_c1_g1	0	0	0	0	0	0	--	--	--	--	--	--
TRINITY_DN100269_c0_g1	0	0.371	0.268	0.245	0.196	0	--	--	--	--	--	--
TRINITY_DN100270_c0_g1	0	0.13	0.193	0	0	0	--	--	--	--	--	--
TRINITY_DN100271_c0_g1	0	0.882	0	0	0	0	--	--	--	--	--	--
TRINITY_DN100272_c0_g1	0.448	0	0	0	0	0	--	--	--	--	--	--
TRINITY_DN100273_c0_g1	0	0	0	0	0.258	0.144	--	--	--	gb|PAN12677.1|	--	A0A0Q3LD16_BRADI, SubName: Full=Uncharacterized protein {ECO:0000313|EMBL:KQJ90445.1};
TRINITY_DN100277_c0_g1	0	0	0	0	1.406	0	--	--	--	--	--	--
TRINITY_DN100278_c0_g1	0.129	0	0.171	0.914	0	0	--	--	--	--	--	--
TRINITY_DN100283_c0_g1	0	0.521	0	0	0	0	GO:0005576,extracellular region; GO:0005507,copper ion binding; GO:0008447,L-ascorbate oxidase activity	K00423: E1.10.3.3; L-ascorbate oxidase [EC:1.10.3.3]	At4g39830	ref|XP_003560646.1|	ASO_TOBAC, RecName: Full=L-ascorbate oxidase; Short=ASO; Short=Ascorbase; EC=1.10.3.3; Flags: Precursor;	I1GXW0_BRADI, SubName: Full=Uncharacterized protein {ECO:0000313|EMBL:KQK17923.1, ECO:0000313|EnsemblPlants:BRADI1G37620.1};
TRINITY_DN100284_c0_g1	0	0	0.064	0.113	0.052	0.394	--	--	SPAC955.02c	--	--	--
TRINITY_DN100285_c0_g1	0	0.251	0	0	0.29	0	--	--	--	--	--	--
TRINITY_DN100286_c0_g1	0	0.12	0	0	0	0.154	--	--	--	--	--	--
TRINITY_DN100288_c1_g1	1.343	0	0	0	0	0	--	--	--	--	--	--
TRINITY_DN100291_c0_g1	0.517	0	0	0	0	0	--	--	--	ref|XP_015872498.1|	--	R1C7F0_EMIHU, SubName: Full=Uncharacterized protein {ECO:0000313|EMBL:EOD18543.1, ECO:0000313|EnsemblProtists:EOD18543};
TRINITY_DN100291_c0_g2	0.209	0	0	0	0	0	--	--	--	gb|POF14366.1|	--	R1DNF4_EMIHU, SubName: Full=Uncharacterized protein {ECO:0000313|EMBL:EOD16000.1, ECO:0000313|EnsemblProtists:EOD16000};
TRINITY_DN100293_c0_g1	0	0	0	0	0	0	--	--	--	--	--	--
TRINITY_DN100294_c0_g1	0	0.271	0	0	0	1.326	--	--	--	--	--	--
TRINITY_DN100295_c0_g1	0	0	0	0	0.321	0	--	--	--	--	--	--
TRINITY_DN100295_c0_g2	0	0	0	0.283	0	0.125	--	--	--	--	--	--
TRINITY_DN100296_c0_g1	0.408	0	0	0	0	0	--	--	--	--	--	--
TRINITY_DN100297_c0_g1	0.07	0.231	0	0.17	0	0	--	--	SPBC839.09c	gb|POE87880.1|	--	--
TRINITY_DN100298_c0_g1	0.647	0	0	0	0	0	--	--	--	--	--	--
TRINITY_DN1002_c0_g1	0	0	0	0.226	0.052	0	--	--	--	--	--	--
TRINITY_DN100301_c0_g1	0.935	0	0	0	0	0	--	--	--	--	--	--
TRINITY_DN100302_c0_g1	0	0	0	0	0.724	0	--	--	--	--	--	--
TRINITY_DN100303_c0_g1	0.458	0.201	0	0.801	0	0	--	--	--	--	--	--
TRINITY_DN100304_c0_g1	0.288	0	0	0	0	0	--	--	--	--	--	--
TRINITY_DN100307_c0_g1	0.925	0	0	0	0	0	--	--	--	--	--	--
TRINITY_DN100309_c0_g1	0	0	0	0	0	0	--	--	--	--	--	--
TRINITY_DN10030_c0_g1	0	0	0	0.688	0	0	--	--	--	--	--	--
TRINITY_DN100311_c0_g1	0	0	0	0	1.127	1.326	--	--	--	--	--	--
TRINITY_DN100313_c0_g1	0	0.511	0	0	0.269	0	--	--	SPBC1718.06	gb|POE89233.1|	--	--
TRINITY_DN100314_c0_g1	0.607	0	0	0	0	0	--	--	--	--	--	--
TRINITY_DN100315_c0_g1	0.925	0	0	0	0	0	--	--	--	ref|XP_020082787.1|	--	A0A2I0WGN1_9ASPA, SubName: Full=Disease resistance RPP13-like protein 1 {ECO:0000313|EMBL:PKU74802.1};
TRINITY_DN100317_c0_g1	0.756	0	0	0	0.703	0	--	--	--	--	--	--
TRINITY_DN100318_c0_g1	0	0	0	0	0	0	--	--	--	--	--	--
TRINITY_DN10031_c0_g1	0	0	0	0	0.724	0	--	--	--	--	--	--
TRINITY_DN100320_c0_g1	0.597	0	0	0	0	0	--	--	--	--	--	--
TRINITY_DN100320_c1_g1	0.388	0	0	0	0	0	--	--	--	--	--	--
TRINITY_DN100321_c0_g1	0.816	0	0	0	0	0	--	--	--	--	--	--
TRINITY_DN100321_c0_g2	0.477	0	0	0	0	0	--	--	--	gb|EMS56308.1|	--	M7YZN0_TRIUA, SubName: Full=Uncharacterized protein {ECO:0000313|EMBL:EMS56308.1, ECO:0000313|EnsemblPlants:TRIUR3_18934-P1};
TRINITY_DN100323_c0_g1	0	0	0	0	0	0	--	--	--	--	--	--
TRINITY_DN100324_c0_g1	0.02	0.01	0	0.028	1.282	0.298	GO:0005829,cytosol; GO:0005634,nucleus; GO:0000502,proteasome complex; GO:0008540,proteasome regulatory particle, base subcomplex; GO:0034515,proteasome storage granule; GO:0030234,enzyme regulator activity; GO:0043161,proteasome-mediated ubiquitin-dependent protein catabolic process; GO:0042176,regulation of protein catabolic process	--	SPBC17D11.07c	ref|XP_001769422.1|	PSD1A_ARATH, RecName: Full=26S proteasome non-ATPase regulatory subunit 1 homolog A; AltName: Full=26S proteasome regulatory subunit RPN2a; Short=AtRPN2a; AltName: Full=26S proteasome regulatory subunit S1 homolog A;	L1JT31_GUITH, SubName: Full=26S proteasome regulatory complex, subunit RPN2 {ECO:0000313|EMBL:EKX51464.1};
TRINITY_DN100325_c0_g1	0	0	3.695	0	0	0	--	--	--	--	--	--
TRINITY_DN100326_c0_g1	0	0	0	0	1.406	0	--	--	--	--	--	--
TRINITY_DN100327_c0_g1	0	0.17	0	0	0	0	--	--	--	--	--	--
TRINITY_DN100327_c1_g1	0	0	0	0.405	0	0	--	--	--	--	--	--
TRINITY_DN100328_c0_g1	0.587	0	0	0	0	0	--	--	--	--	--	--
TRINITY_DN100328_c0_g2	0	0	0	0	1.623	0	--	--	--	--	--	--
TRINITY_DN100329_c0_g1	0.856	0	0	0	0	0	--	--	--	--	--	--
TRINITY_DN100329_c0_g2	0	0	1.842	0	0	0	--	--	--	--	--	--
TRINITY_DN100330_c0_g1	0.607	0	0	0	0	0	--	--	--	--	--	--
TRINITY_DN100331_c0_g1	0.099	0.07	0	0	0	0.125	--	--	--	--	--	--
TRINITY_DN100331_c0_g2	0	0.351	0	0.32	0	0.144	--	--	--	ref|XP_002994600.1|	--	D8TG80_SELML, SubName: Full=Uncharacterized protein {ECO:0000313|EMBL:EFJ04336.1}; Flags: Fragment;
TRINITY_DN100332_c0_g1	0	0	0.161	0	0.124	0	--	--	--	--	--	--
TRINITY_DN100332_c1_g1	0	0.08	0	0.113	0.465	0.106	--	--	--	--	--	--
TRINITY_DN100333_c0_g1	0	0	0	0	0	0.624	--	--	--	--	--	--
TRINITY_DN100335_c0_g1	1.771	0	0	0	0	0	--	--	--	--	--	--
TRINITY_DN100336_c0_g1	0.607	0.05	0.075	0.151	0.434	0.25	--	--	--	--	--	--
TRINITY_DN100337_c0_g1	0.706	0	0	0	0	0	--	--	--	--	--	--
TRINITY_DN100338_c0_g1	0	0	0	0	0	0	--	--	--	--	--	--
TRINITY_DN10033_c0_g1	0.09	0.16	0	0.047	0.031	0.134	--	--	--	--	--	--
TRINITY_DN100340_c0_g1	0	0	0	0	0	0	--	--	--	--	--	--
TRINITY_DN100341_c0_g1	0	1.173	0	0	0	1.518	--	--	--	--	--	--
TRINITY_DN100342_c0_g1	0.458	0	0	0	0	0.25	--	--	--	--	--	--
TRINITY_DN100343_c0_g1	0	0.14	0	0	0.682	0	--	--	--	--	--	--
TRINITY_DN100344_c0_g1	0	0	0.718	0	0	0	--	--	--	--	--	--
TRINITY_DN100345_c0_g1	0.099	0.16	0	0	0.093	0	--	--	--	--	--	--
TRINITY_DN100347_c0_g1	1.104	0	0.268	0	0	0	GO:0005829,cytosol; GO:0005634,nucleus; GO:0005524,ATP binding; GO:0016301,kinase activity; GO:0004674,protein serine/threonine kinase activity; GO:0046777,protein autophosphorylation; GO:0009741,response to brassinosteroid	K03083: GSK3B; glycogen synthase kinase 3 beta [EC:2.7.11.26]	Hs21361340	gb|POE56813.1|	KSG8_ARATH, RecName: Full=Shaggy-related protein kinase theta; EC=2.7.11.1; AltName: Full=ASK-theta; AltName: Full=Shaggy-related protein kinase 32; Short=AtSK32;	A0A1D1YSM9_9ARAE, SubName: Full=Glycogen synthase kinase-3 beta {ECO:0000313|EMBL:JAT57673.1};
TRINITY_DN100348_c0_g1	0.179	0.05	0	0.066	0	0.144	--	--	SPAC25B8.18	gb|POE59040.1|	--	--
TRINITY_DN100349_c0_g1	0	0	0	0	0.869	0	--	--	--	--	--	--
TRINITY_DN10034_c0_g1	0.945	0	0	0	0	0	--	--	--	--	--	--
TRINITY_DN100351_c0_g1	0	0	0	0	0	0.576	--	--	--	--	--	--
TRINITY_DN100352_c0_g1	0.279	0.241	0	0	0.3	0	GO:0102198,L-idonate 5-dehydrogenase activity (NAD-dependent); GO:0008270,zinc ion binding; GO:0046183,L-idonate catabolic process	K00008: SORD, gutB; L-iditol 2-dehydrogenase [EC:1.1.1.14]	YJR159w	gb|POE52279.1|	IDND_VITVI, RecName: Full=L-idonate 5-dehydrogenase; EC=1.1.1.366;	F2EAZ4_HORVV, SubName: Full=Predicted protein {ECO:0000313|EMBL:BAK04516.1};
TRINITY_DN100354_c0_g1	0	0	0.557	0	0	0	--	--	--	--	--	--
TRINITY_DN100358_c0_g1	0.965	0	0	0	0	0	--	--	--	--	--	--
TRINITY_DN100358_c0_g2	0	0	0	0	0	0	--	--	--	--	--	--
TRINITY_DN100359_c0_g1	0.308	0	0	0	0	0	--	--	--	--	--	--
TRINITY_DN10035_c0_g1	0	0	0	0.518	0	0	--	--	--	--	--	--
TRINITY_DN100362_c0_g1	0	0	0	0	0	0	--	--	--	--	--	--
TRINITY_DN100364_c0_g1	0	0.421	0	1.621	0	1.028	--	--	--	--	--	--
TRINITY_DN100365_c0_g1	0.159	0	0	0	0.155	0	--	--	--	--	--	--
TRINITY_DN100366_c0_g1	0	0	0	0	0	0	--	--	--	--	--	--
TRINITY_DN100367_c0_g1	0.607	0	0	0	0	0	--	--	--	--	--	--
TRINITY_DN100367_c0_g2	2.646	0	0	0	0	0	--	--	--	--	--	--
TRINITY_DN100369_c0_g1	0.398	0	0.535	0	0	0	--	--	--	--	--	--
TRINITY_DN10036_c0_g1	0.527	0	0	0	0	0	GO:0005736,DNA-directed RNA polymerase I complex; GO:0005665,DNA-directed RNA polymerase II, core complex; GO:0005666,DNA-directed RNA polymerase III complex; GO:0000418,DNA-directed RNA polymerase IV complex; GO:0003677,DNA binding; GO:0003899,DNA-directed 5'-3' RNA polymerase activity; GO:0006360,transcription by RNA polymerase I; GO:0006366,transcription by RNA polymerase II; GO:0006383,transc…	K03013: RPB5, POLR2E; DNA-directed RNA polymerases I, II, and III subunit RPABC1	At3g22320	ref|XP_020590710.1|	RPB5A_ARATH, RecName: Full=DNA-directed RNA polymerases II and IV subunit 5A; Short=RPB5a; AltName: Full=DNA-directed RNA polymerase II subunit E; AltName: Full=RNA polymerase I, II and III 24.3 kDa subunit; Short=AtRPB24.3;	M0S433_MUSAM, SubName: Full=Uncharacterized protein {ECO:0000313|EnsemblPlants:GSMUA_Achr2P00920_001};
TRINITY_DN100370_c0_g1	0.239	0	0	0	0	0	--	--	--	--	--	--
TRINITY_DN100371_c0_g1	1.492	0	0.568	1.762	2.409	2.085	--	--	--	--	--	--
TRINITY_DN100372_c0_g1	0	0	0	0	0	0	--	--	--	--	--	--
TRINITY_DN100374_c0_g1	0	1.424	0	0	0	0	--	--	--	--	--	--
TRINITY_DN100375_c0_g1	0.527	0	0	0	0	0	--	--	--	--	--	--
TRINITY_DN100377_c0_g1	0	0.1	0	0	0	0	--	--	SPAC328.05	gb|POE48141.1|	--	A0A225W7L9_9STRA, SubName: Full=RNA binding protein {ECO:0000313|EMBL:OWZ13208.1};
TRINITY_DN100378_c0_g1	1.323	0	0	0	0	0	--	--	--	--	--	--
TRINITY_DN100378_c1_g1	0.577	0	0	0	0	0	GO:0005887,integral component of plasma membrane; GO:0009705,plant-type vacuole membrane; GO:0046872,metal ion binding; GO:0022841,potassium ion leak channel activity; GO:0071805,potassium ion transmembrane transport; GO:0030322,stabilization of membrane potential	K05389: KCNKF; potassium channel subfamily K, other eukaryote	At4g18160	ref|XP_010924086.1|	KCO3_ORYSJ, RecName: Full=Two pore potassium channel c; Short=Two K(+) channel c; AltName: Full=Calcium-activated outward-rectifying potassium channel 3; Short=OsKCO3;	A0A2H3YIR1_PHODC, SubName: Full=two pore potassium channel c-like {ECO:0000313|RefSeq:XP_008799231.1};
TRINITY_DN100379_c0_g1	0.557	0	0	0	0	0	--	--	--	--	--	--
TRINITY_DN100379_c0_g2	1.054	0	0	0	0	0	--	--	--	--	--	--
TRINITY_DN10037_c0_g1	0	0	0	0	0.755	0	--	--	--	--	--	--
TRINITY_DN10037_c1_g1	0	0	0	0	0.786	0	--	--	--	--	--	--
TRINITY_DN100380_c0_g1	1.721	0	0	0	0	0	--	--	--	--	--	--
TRINITY_DN100381_c0_g1	0.298	0	0	0	0.29	0	--	--	--	--	--	--
TRINITY_DN100383_c0_g1	0	0	0	0	0.414	1.479	--	--	--	--	--	--
TRINITY_DN100385_c0_g1	0	0	0	0	0	0.865	--	--	--	--	--	--
TRINITY_DN100385_c0_g2	0	0	0	0.236	0	0.221	--	--	--	--	--	--
TRINITY_DN100386_c0_g1	0	0.963	0	0	0	0	--	--	--	--	--	--
TRINITY_DN100387_c0_g1	0	0.11	0	0	0	0	--	--	--	--	--	--
TRINITY_DN100387_c0_g2	0	0.181	0.3	0	0.434	0.25	--	--	--	--	--	--
TRINITY_DN100389_c0_g1	0.537	0	0.107	0	0	0.134	GO:0005618,cell wall; GO:0000790,nuclear chromatin; GO:0005730,nucleolus; GO:0000786,nucleosome; GO:0003677,DNA binding; GO:0046982,protein heterodimerization activity; GO:0006342,chromatin silencing	K11251: H2A; histone H2A	SPCC622.08c	gb|POF02274.1|	H2A1_ARATH, RecName: Full=Probable histone H2A.1; AltName: Full=HTA10;	F2DGG6_HORVV, RecName: Full=Histone H2A {ECO:0000256|RuleBase:RU003767};
TRINITY_DN100389_c0_g2	0.08	0.261	0	0	0	0	--	--	--	--	--	--
TRINITY_DN100391_c0_g1	0	0	0	0	0	0	--	--	--	--	--	--
TRINITY_DN100392_c0_g1	2.318	0.712	0	0	0	0	--	--	--	--	--	--
TRINITY_DN100393_c0_g1	0	0.421	0	0.123	0	0	--	--	--	--	--	--
TRINITY_DN100395_c0_g1	0	0	0	1.131	0	0	--	--	--	--	--	--
TRINITY_DN100396_c0_g1	0.09	0.15	0	0.113	0.093	0.096	--	K14788: NOL10, ENP2; ribosome biogenesis protein ENP2	YGR145w	gb|POF17854.1|	--	A8J7D8_CHLRE, SubName: Full=Predicted protein {ECO:0000313|EMBL:EDP00090.1}; Flags: Fragment;
TRINITY_DN100397_c0_g1	0	1.835	0	0	0	0	--	--	--	--	--	--
TRINITY_DN100398_c0_g1	0.925	0	0	0	0	0	--	--	CE18517	--	--	--
TRINITY_DN100399_c0_g1	0	2.808	0	0	0	0	--	--	--	--	--	--
TRINITY_DN10039_c0_g1	0.537	0	0	0	0	0	GO:0005737,cytoplasm; GO:0005634,nucleus; GO:0005886,plasma membrane; GO:0005524,ATP binding; GO:0005509,calcium ion binding; GO:0009931,calcium-dependent protein serine/threonine kinase activity; GO:0005516,calmodulin binding; GO:0004683,calmodulin-dependent protein kinase activity; GO:0009738,abscisic acid-activated signaling pathway; GO:0035556,intracellular signal transduction; GO:0018105,pep…	K13412: CPK; calcium-dependent protein kinase [EC:2.7.11.1]	At3g57530	ref|XP_013449632.1|	CDPKK_ORYSJ, RecName: Full=Calcium-dependent protein kinase 20 {ECO:0000305}; Short=OsCDPK20 {ECO:0000305}; Short=OsCPK20 {ECO:0000303|PubMed:15695435}; EC=2.7.11.1 {ECO:0000305};	A0A072UCS7_MEDTR, SubName: Full=Calmodulin-domain kinase CDPK protein {ECO:0000313|EMBL:KEH23660.1};
TRINITY_DN100401_c0_g1	0	0.722	0	0	0	0	--	--	--	--	--	--
TRINITY_DN100401_c1_g1	0	0	0	0	0.641	0	--	--	--	--	--	--
TRINITY_DN100402_c0_g1	0.169	0.14	0	0	0.165	0.192	--	--	--	--	--	--
TRINITY_DN100403_c0_g1	0	0	0	1.508	0	0	--	--	--	--	--	--
TRINITY_DN100404_c0_g1	0	0	0	0	4.715	0	--	--	--	--	--	--
TRINITY_DN100405_c0_g1	0.935	0	0	0	0	0	GO:0005634,nucleus; GO:0005840,ribosome; GO:0008097,5S rRNA binding; GO:0003735,structural constituent of ribosome; GO:0006412,translation	K02932: RP-L5e, RPL5; large subunit ribosomal protein L5e	SPBC11C11.09c	gb|ACG27083.1|	RL5_HELAN, RecName: Full=60S ribosomal protein L5;	B6SQF0_MAIZE, SubName: Full=60S ribosomal protein L5-2 {ECO:0000313|EMBL:ACG27083.1};
TRINITY_DN100407_c0_g1	0.298	0.03	0.043	0.047	0.041	0.077	--	--	--	--	--	--
TRINITY_DN100408_c0_g1	0	0	0	0	0	0.471	--	--	--	--	--	--
TRINITY_DN10040_c0_g1	1.114	0	0	0	0	0	--	--	--	--	--	--
TRINITY_DN100411_c0_g1	0	0	0	0	0	0	--	--	--	--	--	--
TRINITY_DN100412_c0_g1	0.259	0	0	0.603	0	0	--	--	--	--	--	--
TRINITY_DN100413_c0_g1	0	0.05	0.225	0	0.403	0.096	--	--	--	--	--	--
TRINITY_DN100413_c1_g1	0.04	0.06	0.086	0.057	0.176	0	--	--	--	--	--	--
TRINITY_DN100415_c0_g1	0	0	0	0	0	0	--	--	--	--	--	--
TRINITY_DN100419_c0_g1	0.099	2.397	0	0	0	0.259	--	--	--	--	--	--
TRINITY_DN100419_c0_g2	0	0	0.621	0	0	0	--	--	--	--	--	--
TRINITY_DN100419_c0_g3	0.279	0.09	0	0.245	0.01	0	--	--	YKL217w	gb|POE94461.1|	--	A0A225X1L3_9STRA, SubName: Full=Major Facilitator Superfamily (MFS) transporter {ECO:0000313|EMBL:OWZ23781.1};
TRINITY_DN10041_c0_g1	0	0.291	0	0.198	0.155	0	--	--	At5g54630	gb|EEE55508.1|	--	A0A0A9FB50_ARUDO, SubName: Full=Uncharacterized protein {ECO:0000313|EMBL:JAE07376.1};
TRINITY_DN100420_c0_g1	0	0	0	1.338	0	0	--	--	--	--	--	--
TRINITY_DN100421_c0_g1	0.209	0.09	0.032	0.113	0.186	0.202	--	--	SPAC22F3.12c	gb|POF16443.1|	--	--
TRINITY_DN100422_c0_g1	0	0	0.064	0	0	1.499	--	--	--	--	--	--
TRINITY_DN100423_c0_g1	0	0	0	0.207	0.165	0	--	--	--	--	--	--
TRINITY_DN100424_c0_g1	0	1.203	0	0	0	0	--	--	--	--	--	--
TRINITY_DN100424_c0_g2	0	0	0	0	0	0	--	--	--	--	--	--
TRINITY_DN100425_c0_g1	1.263	0	0	0	0	0	--	--	--	--	--	--
TRINITY_DN100426_c0_g1	1.452	0	0	0	0	0	--	K18740: EXD1, EGL; exonuclease 3'-5' domain-containing protein 1	--	ref|XP_020106205.1|	--	A0A1J6ITK6_NICAT, SubName: Full=Uncharacterized protein {ECO:0000313|EMBL:OIT08541.1};
TRINITY_DN100427_c0_g1	0.477	0	0	0	0	0	--	--	--	--	--	--
TRINITY_DN100428_c0_g1	0	0	0	0	0	3.218	--	--	--	--	--	--
TRINITY_DN100429_c0_g1	0.06	0	0	0	0.403	0	--	--	--	gb|POF18690.1|	--	--
TRINITY_DN10042_c0_g1	0	0	0	0	0.682	0	--	--	--	--	--	--
TRINITY_DN100430_c0_g1	0	0	0	0	0	0	--	--	--	--	--	--
TRINITY_DN100430_c0_g2	0	0.301	0	0.207	0	0	--	--	--	gb|POE85072.1|	--	A0A1Y1I090_KLENI, SubName: Full=Uncharacterized protein {ECO:0000313|EMBL:GAQ83863.1};
TRINITY_DN100431_c0_g1	1.184	0	0	0	0	0	--	--	--	--	--	--
TRINITY_DN100431_c1_g1	0	0	0	0	0	0	--	--	--	--	--	--
TRINITY_DN100432_c0_g1	0	0	0	0	0.434	0	--	--	--	--	--	--
TRINITY_DN100433_c0_g1	0	0	0	0	0	0	--	--	--	--	--	--
TRINITY_DN100434_c0_g1	0.119	0	0	0	0	0	--	--	Hs19913416	--	--	--
TRINITY_DN100437_c0_g1	0	0	1.628	0	0	0	--	--	--	--	--	--
TRINITY_DN100437_c0_g2	0	0	0	0	0	0	--	--	--	--	--	--
TRINITY_DN100438_c0_g1	2.716	0	0	0	0	0	--	--	--	--	--	--
TRINITY_DN100438_c1_g1	0	0	0	0	0	0	--	--	--	--	--	--
TRINITY_DN100439_c0_g1	0	0	0	3.421	0	0	--	--	--	--	--	--
TRINITY_DN100439_c1_g1	0	0	0	0	0.558	0	--	--	--	--	--	--
TRINITY_DN100442_c0_g1	0	0	0	0.094	0.3	0	GO:0009507,chloroplast; GO:0010177,2-(2'-methylthio)ethylmalate synthase activity; GO:0003852,2-isopropylmalate synthase activity; GO:0019761,glucosinolate biosynthetic process; GO:0009098,leucine biosynthetic process	K15741: MAM1, IMS3; methylthioalkylmalate synthase 1 [EC:2.3.3.17]	YNL104c	gb|POE85194.1|	MAM3_ARATH, RecName: Full=Methylthioalkylmalate synthase 3, chloroplastic; EC=2.3.3.17 {ECO:0000269|PubMed:17369439}; AltName: Full=2-isopropylmalate synthase 2; AltName: Full=Methylthioalkylmalate synthase-like; Flags: Precursor;	D8UMZ3_VOLCA, SubName: Full=Uncharacterized protein {ECO:0000313|EMBL:EFJ38906.1}; Flags: Fragment;
TRINITY_DN100444_c0_g1	0.577	0.211	0.182	0	0	0	--	K19525: VPS13A_C; vacuolar protein sorting-associated protein 13A/C	At4g17120	ref|XP_020146921.1|	--	M0VDH3_HORVV, SubName: Full=Uncharacterized protein {ECO:0000313|EnsemblPlants:HORVU1Hr1G055000.33};
TRINITY_DN100445_c0_g1	0.259	0	0.086	0.075	0	0.067	--	--	--	--	--	--
TRINITY_DN100447_c0_g1	0	0	0	0	0	0	--	--	--	--	--	--
TRINITY_DN100450_c0_g1	0	0	0	0.179	0	0.423	--	--	--	--	--	--
TRINITY_DN100454_c0_g1	0	0	0	0	0	0	--	--	--	--	--	--
TRINITY_DN100454_c1_g1	0	0.12	0.096	0.17	0.072	0	--	--	--	--	--	--
TRINITY_DN100455_c0_g1	0	0	0	0	0.352	0	--	--	--	--	--	--
TRINITY_DN100456_c0_g1	0	0.211	0	0	0	0.125	--	--	--	--	--	--
TRINITY_DN100457_c0_g1	0	0	0	0	0.527	0.644	--	--	--	--	--	--
TRINITY_DN100457_c1_g1	0	0	0	0	0	1.652	--	--	--	--	--	--
TRINITY_DN100458_c0_g1	0	0	0	0	0	0.317	--	--	--	--	--	--
TRINITY_DN100459_c0_g1	0.816	0	1.114	1.668	2.285	5.687	--	--	--	--	--	--
TRINITY_DN100461_c0_g1	0	0	0	1.555	0	0	--	--	--	--	--	--
TRINITY_DN100462_c0_g1	0	0	0	0	0	0	--	--	--	--	--	--
TRINITY_DN100464_c0_g1	0	0.491	0	0	0	0.106	--	--	--	--	--	--
TRINITY_DN100465_c0_g1	0.647	0	0	0	0	0	--	--	--	--	--	--
TRINITY_DN100466_c0_g1	0	0	0	0.415	0	0	--	--	--	--	--	--
TRINITY_DN100467_c0_g1	0.706	0	0	0	0	0	--	K15407: QTRTD1; queuine tRNA-ribosyltransferase subunit QTRTD1 [EC:2.4.2.29]	At3g15680	gb|AQS22700.1|	--	A0A1S6GLH8_9POAL, SubName: Full=Putative zinc finger protein {ECO:0000313|EMBL:AQS22700.1}; Flags: Fragment;
TRINITY_DN100468_c0_g1	0	0	0	0	0.641	0	--	--	--	--	--	--
TRINITY_DN100469_c0_g1	0.09	0.471	0.064	0.057	0.558	0.077	--	--	--	--	--	--
TRINITY_DN10046_c0_g1	1.313	0	0	0	0	0	GO:0005829,cytosol; GO:0005634,nucleus; GO:0048826,cotyledon morphogenesis; GO:0009908,flower development; GO:0009965,leaf morphogenesis; GO:0051781,positive regulation of cell division; GO:0040008,regulation of growth; GO:0006355,regulation of transcription, DNA-templated; GO:0048316,seed development; GO:0010091,trichome branching	--	At3g23980	ref|XP_009417201.1|	BLI_ARATH, RecName: Full=Protein BLISTER {ECO:0000303|PubMed:20647345}; AltName: Full=Protein KOLD SENSITIV-1 {ECO:0000303|PubMed:20674078};	M0TZF1_MUSAM, SubName: Full=Uncharacterized protein {ECO:0000313|EnsemblPlants:GSMUA_Achr9P11420_001};
TRINITY_DN100470_c0_g1	0.667	0.913	0	0	0.962	0	--	--	--	--	--	--
TRINITY_DN100471_c0_g1	2.298	0	0	0	0	0	--	--	--	--	--	--
TRINITY_DN100473_c0_g1	0	0	0	0	0	0	--	--	--	--	--	--
TRINITY_DN100474_c0_g1	0	0.662	0	0	0	0	--	--	--	--	--	--
TRINITY_DN100475_c0_g1	2.586	0	0	0	0	0	--	--	--	--	--	--
TRINITY_DN100476_c0_g1	0.229	0.411	0.3	0	0.445	0.25	--	--	--	--	--	--
TRINITY_DN100478_c0_g1	0	0	0	0	0	0	--	--	--	--	--	--
TRINITY_DN100480_c0_g1	0	0.04	0.054	0.123	0	0.086	--	--	--	--	--	--
TRINITY_DN100483_c0_g1	0.865	0	0	0	0	0	--	--	--	--	--	--
TRINITY_DN100484_c0_g1	0	0	0	0.858	0.341	0	--	--	--	--	--	--
TRINITY_DN100486_c0_g1	0.249	0	0	0	0	0	--	--	--	--	--	--
TRINITY_DN100487_c0_g1	0	0	0	0	0	0	--	--	--	--	--	--
TRINITY_DN10048_c0_g1	0.179	0.11	0.161	0	0.176	0.24	GO:0005829,cytosol; GO:0005525,GTP binding; GO:0003924,GTPase activity; GO:0042254,ribosome biogenesis	K14539: LSG1; large subunit GTPase 1 [EC:3.6.1.-]	YGL099w	gb|POE76134.1|	LSG11_ARATH, RecName: Full=GTPase LSG1-1 {ECO:0000303|PubMed:25319368}; Short=AtLSG1-1 {ECO:0000303|PubMed:25319368}; AltName: Full=DAR GTPase 6 {ECO:0000303|PubMed:16849600}; AltName: Full=Protein YEAST LSG1 ORTHOLOG 1 {ECO:0000303|PubMed:25319368};	A0A061SGP4_9CHLO, SubName: Full=Large subunit GTPase 1 {ECO:0000313|EMBL:JAC81901.1}; Flags: Fragment;
TRINITY_DN100491_c0_g1	0.07	0	0	1.121	0.072	0	--	--	--	--	--	--
TRINITY_DN100493_c0_g1	0.676	0	0	0	0	0	--	--	7297765	gb|POF02597.1|	--	A0A1D1ZJ02_9ARAE, SubName: Full=Aspartic protease {ECO:0000313|EMBL:JAT66783.1};
TRINITY_DN100494_c0_g1	0.04	0	0	0.075	0.083	0.279	--	K19036: IGHMBP2; ATP-dependent RNA/DNA helicase IGHMBP2 [EC:3.6.4.12 3.6.4.13]	SPCC737.07c	gb|POE49215.1|	--	A0A176VR81_MARPO, SubName: Full=Uncharacterized protein {ECO:0000313|EMBL:OAE22366.1};
TRINITY_DN100495_c0_g1	0	0.15	0	3.016	0.29	0	--	--	--	--	--	--
TRINITY_DN100496_c0_g1	0.567	0	0	0	0	0	--	--	--	--	--	--
TRINITY_DN100497_c0_g1	0	0	0.118	0.113	0	0.106	--	--	--	--	--	--
TRINITY_DN100499_c0_g1	0	0.862	0	0	0	0	--	--	--	--	--	--
TRINITY_DN100499_c0_g2	0.209	0	0	0.744	0	0	--	--	--	--	--	--
TRINITY_DN100500_c0_g1	0	0	0	0	0	0	--	--	--	--	--	--
TRINITY_DN100502_c0_g1	1.174	0	0	0	0	0	--	--	--	--	--	--
TRINITY_DN100503_c0_g1	0.676	0	0.439	0	0	0	--	--	--	--	--	--
TRINITY_DN100504_c0_g1	0.438	0	0	0	0	0	--	--	--	--	--	--
TRINITY_DN100505_c0_g1	0.199	0.531	0.257	0.471	0	1.306	--	--	--	--	--	--
TRINITY_DN100506_c0_g1	0	0	0	0	0	0.893	--	--	--	--	--	--
TRINITY_DN100508_c0_g1	1.045	0	0	0	0	0	--	--	--	--	--	--
TRINITY_DN100509_c0_g1	1.025	0	0	0	0	0	--	--	--	--	--	--
TRINITY_DN100510_c0_g1	0	0	1.135	0.349	0.931	0	--	--	--	--	--	--
TRINITY_DN100514_c0_g1	0	0.501	0	0	0	0	--	--	--	--	--	--
TRINITY_DN100514_c0_g2	0	0.05	0	0.094	0	0	--	--	--	ref|XP_010234978.2|	--	A0A0Q3Q7V4_BRADI, SubName: Full=Uncharacterized protein {ECO:0000313|EMBL:KQJ97697.1};
TRINITY_DN100515_c0_g1	1.253	0	0	0	0	0	--	--	--	--	--	--
TRINITY_DN100516_c0_g1	0.159	0.13	0	0.179	0.072	0.077	--	--	--	--	--	--
TRINITY_DN100518_c0_g1	0	0	0	0	0	0	--	--	--	--	--	--
TRINITY_DN10051_c0_g1	4.417	3.971	0	0	0	0	--	--	--	--	--	--
TRINITY_DN100521_c0_g1	0	0	0	0	0	0	--	--	--	--	--	--
TRINITY_DN100522_c0_g1	0	0	0	0	0.972	0	--	--	--	--	--	--
TRINITY_DN100523_c0_g1	0.468	0	0	0	0	0	--	--	--	gb|POE51538.1|	--	--
TRINITY_DN100524_c0_g1	0	0	0	1.96	0	0	--	--	--	--	--	--
TRINITY_DN100525_c0_g1	0.408	0	0	0	0	0	--	K16860: PLD3_4; phospholipase D3/4 [EC:3.1.4.4]	--	gb|OAY80641.1|	--	A0A199VUN3_ANACO, SubName: Full=Phospholipase D Z {ECO:0000313|EMBL:OAY80641.1};
TRINITY_DN100526_c0_g1	0	0	0.546	0	0.279	0	--	--	--	--	--	--
TRINITY_DN100528_c0_g1	0	0	0	1.338	0	0	--	--	--	--	--	--
TRINITY_DN100528_c1_g1	0.279	0.742	0	0	0	0	--	--	--	--	--	--
TRINITY_DN100529_c0_g1	0	0	0	0	0.093	0.423	--	--	SPCC645.08c	gb|POF22200.1|	--	A0A0C9RQ39_9SPER, SubName: Full=TSA: Wollemia nobilis Ref_Wollemi_Transcript_3794_3551 transcribed RNA sequence {ECO:0000313|EMBL:JAG89121.1};
TRINITY_DN10052_c0_g1	1.423	1.284	0	0	0	0	--	--	--	--	--	--
TRINITY_DN100530_c0_g1	0	0.672	0.332	0	0	0	--	--	--	--	--	--
TRINITY_DN100530_c0_g2	0	2.567	0	0	0	0	--	--	--	--	--	--
TRINITY_DN100532_c0_g1	0	0	0	2.95	0	0	--	--	--	--	--	--
TRINITY_DN100532_c1_g1	0	0.511	0	0	0	0	--	--	--	--	--	--
TRINITY_DN100533_c0_g1	0.05	0.04	0.139	0	0	0	--	--	--	--	--	--
TRINITY_DN100533_c1_g1	0	0.431	0	0	0.445	1.057	--	--	--	--	--	--
TRINITY_DN100534_c0_g1	0	0	0	0	0	0	--	--	--	--	--	--
TRINITY_DN100535_c0_g1	0	0	0	0	0	1.614	--	--	--	--	--	--
TRINITY_DN100536_c0_g1	0.269	0	0	0.151	0.124	0	--	--	--	gb|POE56841.1|	--	--
TRINITY_DN100537_c0_g1	0	0	0	0	0	0	--	--	--	--	--	--
TRINITY_DN100537_c1_g1	0	0.06	0.407	0	0.155	0	--	--	--	--	--	--
TRINITY_DN100538_c0_g1	0	1.133	0	0	0.134	0	GO:0005524,ATP binding; GO:0004371,glycerone kinase activity; GO:0006071,glycerol metabolic process	K00863: DAK, TKFC; triose/dihydroxyacetone kinase / FAD-AMP lyase (cyclizing) [EC:2.7.1.28 2.7.1.29 4.6.1.15]	SPAC22A12.11	gb|POF14102.1|	DHBK_SOLLC, RecName: Full=Putative 3,4-dihydroxy-2-butanone kinase; EC=2.7.1.-;	A0A1V9ZAW7_9STRA, SubName: Full=Dihydroxyacetone kinase {ECO:0000313|EMBL:OQR95144.1};
TRINITY_DN100541_c0_g1	0.627	0	0	0	0	0	--	--	--	--	--	--
TRINITY_DN100542_c0_g1	0.547	0	6.415	0	0	0	--	--	--	--	--	--
TRINITY_DN100543_c0_g1	0	0.582	0	0	0.31	0	--	--	--	--	--	--
TRINITY_DN100544_c0_g1	0	0	0	0	0	0	--	--	--	--	--	--
TRINITY_DN100545_c0_g1	0	0	0	0	0.227	0.086	GO:0016491,oxidoreductase activity	K00059: fabG; 3-oxoacyl-[acyl-carrier protein] reductase [EC:1.1.1.100]	7290108	gb|POF12832.1|	SDR1_PICAB, RecName: Full=Short-chain type dehydrogenase/reductase; EC=1.-.-.-;	A0A199UAU3_MANES, SubName: Full=Uncharacterized protein {ECO:0000313|EMBL:OAY21731.1};
TRINITY_DN100547_c0_g1	0	2.968	0	0	0	0	--	--	--	--	--	--
TRINITY_DN100547_c1_g1	0	0.602	0	0	0	0	--	--	--	--	--	--
TRINITY_DN100548_c0_g1	0	0	1.135	0	0	0	--	--	--	--	--	--
TRINITY_DN10054_c0_g1	0.368	0	0	0	0	0	--	--	--	--	--	--
TRINITY_DN100550_c0_g1	0.288	0	0	0	0	0	--	--	--	--	--	--
TRINITY_DN100551_c0_g1	0.318	0.702	0	0	0	0	--	--	--	--	--	--
TRINITY_DN100553_c0_g1	5.024	0	0	0	0	0	--	--	--	--	--	--
TRINITY_DN100553_c0_g2	0.388	0	0	0	0	0	--	--	--	--	--	--
TRINITY_DN100555_c0_g1	5.153	3.6	0.942	1.677	4.963	7.234	--	--	--	--	--	--
TRINITY_DN100556_c0_g1	0.279	0.391	0	0.085	0.072	0	--	--	--	--	--	--
TRINITY_DN100557_c0_g1	0.905	0	0	0	0	0	--	--	--	--	--	--
TRINITY_DN100558_c0_g1	0.338	0	0	0	0	0	GO:0005829,cytosol; GO:0004130,cytochrome-c peroxidase activity; GO:0020037,heme binding; GO:0016688,L-ascorbate peroxidase activity; GO:0046872,metal ion binding; GO:0004601,peroxidase activity; GO:0034599,cellular response to oxidative stress; GO:0042744,hydrogen peroxide catabolic process; GO:0000302,response to reactive oxygen species; GO:0009845,seed germination; GO:0010431,seed maturation	K00434: E1.11.1.11; L-ascorbate peroxidase [EC:1.11.1.11]	--	ref|XP_017698731.1|	APX6_ARATH, RecName: Full=Putative L-ascorbate peroxidase 6; Short=AtAPx08; EC=1.11.1.11;	A0A2H3ZRG5_PHODC, SubName: Full=putative L-ascorbate peroxidase 6 isoform X2 {ECO:0000313|RefSeq:XP_017698731.1};
TRINITY_DN10055_c0_g1	0	0.17	0.257	0	0	0	GO:0005737,cytoplasm; GO:0005524,ATP binding; GO:0004748,ribonucleoside-diphosphate reductase activity, thioredoxin disulfide as acceptor; GO:0009202,deoxyribonucleoside triphosphate biosynthetic process; GO:0009263,deoxyribonucleotide biosynthetic process; GO:0006260,DNA replication; GO:0046686,response to cadmium ion	K10807: RRM1; ribonucleoside-diphosphate reductase subunit M1 [EC:1.17.4.1]	Hs4506749	ref|XP_020081756.1|	RIR1_ARATH, RecName: Full=Ribonucleoside-diphosphate reductase large subunit {ECO:0000303|PubMed:10542051}; EC=1.17.4.1; AltName: Full=Protein DEFECTIVE IN POLLEN DNA DEGRADATION 2 {ECO:0000303|PubMed:22239102}; AltName: Full=Ribonucleoside-diphosphate reductase R1 subunit {ECO:0000303|PubMed:10542051}; Short=AtRNR1;	R7QKH3_CHOCR, RecName: Full=Ribonucleoside-diphosphate reductase {ECO:0000256|RuleBase:RU003410}; EC=1.17.4.1 {ECO:0000256|RuleBase:RU003410};
TRINITY_DN100560_c0_g1	0	0	0	0	0	0.749	--	--	--	--	--	--
TRINITY_DN100561_c0_g1	0	0.04	0.193	0.179	0	0.058	--	--	--	--	--	--
TRINITY_DN100562_c1_g1	0	1.284	0	0	0	0	--	--	--	--	--	--
TRINITY_DN100564_c0_g1	0	0.933	0	0	0	0.769	--	--	--	--	--	--
TRINITY_DN100564_c0_g2	0	0	0.139	0	0.145	0	--	--	--	--	--	--
TRINITY_DN100564_c1_g1	0	0	0	0	0	0	--	--	--	--	--	--
TRINITY_DN100565_c0_g1	0	0	0.653	0	0.548	0.557	--	--	--	--	--	--
TRINITY_DN100566_c0_g1	0.219	0	0	0.066	0.155	0.058	--	--	--	--	--	--
TRINITY_DN100566_c1_g1	0	0	0	0	0	0	--	--	--	--	--	--
TRINITY_DN100567_c0_g1	0	0	0	0	0	0	--	--	--	--	--	--
TRINITY_DN100568_c0_g1	0	0.211	0	0	0	0	--	--	--	--	--	--
TRINITY_DN100569_c0_g1	0	0	0	4.533	0	0	--	--	--	--	--	--
TRINITY_DN10056_c0_g1	0	0.481	0	0	0	0	--	--	--	--	--	--
TRINITY_DN100570_c0_g1	0	0.872	0	0	0	0	--	--	--	--	--	--
TRINITY_DN100571_c0_g1	0	0	0	0	0.145	0.25	--	--	--	emb|CDM85223.1|	--	A0A1D6C4R2_WHEAT, SubName: Full=Uncharacterized protein {ECO:0000313|EnsemblPlants:TRIAE_CS42_7BL_TGACv1_577314_AA1871970.1};
TRINITY_DN100571_c0_g2	0	0	0	0	0.052	0.451	--	--	--	--	--	A0A1D6C4R2_WHEAT, SubName: Full=Uncharacterized protein {ECO:0000313|EnsemblPlants:TRIAE_CS42_7BL_TGACv1_577314_AA1871970.1};
TRINITY_DN100572_c0_g1	0	0	3.823	0	0	0	--	--	--	--	--	--
TRINITY_DN100573_c0_g1	0.189	0.17	0.246	0	0.186	0.211	GO:0009507,chloroplast; GO:0016021,integral component of membrane; GO:0005778,peroxisomal membrane; GO:0004130,cytochrome-c peroxidase activity; GO:0020037,heme binding; GO:0016688,L-ascorbate peroxidase activity; GO:0046872,metal ion binding; GO:0034599,cellular response to oxidative stress; GO:0042744,hydrogen peroxide catabolic process; GO:0000302,response to reactive oxygen species	K00428: E1.11.1.5; cytochrome c peroxidase [EC:1.11.1.5]	YKR066c	gb|POE74521.1|	APX4_ORYSJ, RecName: Full=Probable L-ascorbate peroxidase 4, peroxisomal {ECO:0000305}; EC=1.11.1.11 {ECO:0000305}; AltName: Full=OsAPx4 {ECO:0000303|PubMed:15599508};	A0A0D2K581_9CHLO, SubName: Full=Cytochrome c peroxidase {ECO:0000313|EMBL:KIZ05573.1}; EC=1.11.1.5 {ECO:0000313|EMBL:KIZ05573.1};
TRINITY_DN100574_c0_g1	0	0.271	0	0	0	0	--	--	--	--	--	--
TRINITY_DN100575_c0_g1	0	0	0	0	0.103	0	GO:0005634,nucleus; GO:0003700,DNA binding transcription factor activity; GO:0043565,sequence-specific DNA binding; GO:0006351,transcription, DNA-templated	K09338: HD-ZIP; homeobox-leucine zipper protein	At5g06710	ref|XP_020180166.1|	HOX18_ORYSI, RecName: Full=Homeobox-leucine zipper protein HOX18; AltName: Full=HD-ZIP protein HOX18; AltName: Full=Homeodomain transcription factor HOX18; AltName: Full=OsHox18;	T1ND42_TRIUA, SubName: Full=Uncharacterized protein {ECO:0000313|EnsemblPlants:TRIUR3_28462-P1};
TRINITY_DN100577_c0_g1	0	1.033	0	0	0.713	0	--	--	--	--	--	--
TRINITY_DN100578_c0_g1	0	0	0	0	1.778	0	--	--	--	--	--	--
TRINITY_DN100578_c0_g2	0	0	0	1.037	0.021	0	--	--	--	--	--	--
TRINITY_DN100579_c0_g1	2.935	0	0	0	0	0	--	--	--	--	--	--
TRINITY_DN10057_c0_g1	0	0	0	0	0	1.066	--	--	--	--	--	--
TRINITY_DN100580_c0_g1	0	0	1.66	0	0	0	--	--	--	--	--	--
TRINITY_DN100583_c0_g1	0	0.05	0	0.141	0.238	0.413	--	--	--	--	--	--
TRINITY_DN100584_c0_g1	1.114	0	0	0	0	0	--	--	--	--	--	--
TRINITY_DN100585_c0_g1	0	3.179	0	0	0	0	--	--	--	--	--	--
TRINITY_DN100585_c0_g2	0	0.692	0	0	0	0	--	--	--	--	--	--
TRINITY_DN100586_c0_g1	1.423	0	0	0	0	0	--	--	--	--	--	--
TRINITY_DN100589_c0_g1	0	0	0	2.262	0	0	--	--	--	--	--	--
TRINITY_DN100590_c0_g1	0.736	1.013	0	0.433	0	0	--	--	--	--	--	--
TRINITY_DN100591_c0_g1	0	0	0	0	1.623	0	--	--	--	--	--	--
TRINITY_DN100592_c0_g1	0	1.424	1.05	0	0	0	--	--	--	--	--	--
TRINITY_DN100594_c0_g1	0.756	0	0	0	0	0	GO:0005789,endoplasmic reticulum membrane; GO:0016021,integral component of membrane; GO:0030674,protein binding, bridging; GO:0006696,ergosterol biosynthetic process	--	At1g10030	ref|XP_015618276.1|	ERG28_ARATH, RecName: Full=Ergosterol biosynthetic protein 28;	A0A0E0LDD5_ORYPU, SubName: Full=Uncharacterized protein {ECO:0000313|EnsemblPlants:OPUNC06G18790.1};
TRINITY_DN100596_c0_g1	0	0	0	0	0.724	0.893	--	--	--	--	--	--
TRINITY_DN100597_c0_g1	0	0	0	0	0	2.546	--	--	--	--	--	--
TRINITY_DN100597_c1_g1	0	0.341	0	0.433	0	0	--	--	--	--	--	--
TRINITY_DN100599_c0_g1	0.318	0.281	0	0	0	0	--	--	Hs4504505	gb|POE66126.1|	--	A0A1D1Z579_9ARAE, SubName: Full=Oleate-induced peroxisomal protein POX18 {ECO:0000313|EMBL:JAT62067.1};
TRINITY_DN10059_c0_g1	0	0	0	1.027	0	0	--	--	--	--	--	--
TRINITY_DN1005_c0_g1	0	0	0	0	0	0	--	--	--	--	--	--
TRINITY_DN100601_c0_g1	0.388	0	1.178	0	0.672	0	--	--	--	--	--	--
TRINITY_DN100602_c0_g1	0.368	0	0.471	0	0	0	--	--	SPAC6F12.07	gb|POE72294.1|	--	A0A1D1YJT5_9ARAE, SubName: Full=Mitochondrial import receptor subunit tom20 {ECO:0000313|EMBL:JAT54908.1};
TRINITY_DN100603_c0_g1	0	1.875	0	0	0	0	--	--	--	--	--	--
TRINITY_DN100604_c0_g1	0	0.752	0	0.98	3.05	0	--	--	--	--	--	--
TRINITY_DN100605_c0_g1	0.368	0	0	0	0	0	--	--	--	--	--	--
TRINITY_DN100606_c0_g1	0	0	1.746	0	0	0	--	--	--	--	--	--
TRINITY_DN100608_c0_g1	0	0.211	0	0	0.114	0	--	--	--	--	--	--
TRINITY_DN100609_c0_g1	0	0	0	0	0	0	--	--	--	--	--	--
TRINITY_DN100609_c1_g1	0	0	0	0	0.641	1.566	--	--	--	--	--	--
TRINITY_DN100610_c0_g1	0	0	0	0.471	0.403	0.307	--	--	--	--	--	--
TRINITY_DN100611_c0_g1	0	0.15	0	0	0	0	--	--	--	--	--	--
TRINITY_DN100611_c1_g1	0	0.14	0	0.188	0	0	GO:0005886,plasma membrane; GO:0005524,ATP binding; GO:0004675,transmembrane receptor protein serine/threonine kinase activity; GO:0007166,cell surface receptor signaling pathway; GO:0006952,defense response; GO:0002221,pattern recognition receptor signaling pathway; GO:0006468,protein phosphorylation; GO:0080142,regulation of salicylic acid biosynthetic process	K04733: IRAK4; interleukin-1 receptor-associated kinase 4 [EC:2.7.11.1]	7295638	gb|POF13673.1|	PCRK2_ARATH, RecName: Full=Serine/threonine-protein kinase PCRK2 {ECO:0000305}; EC=2.7.11.1 {ECO:0000305|PubMed:27208222}; AltName: Full=Protein PTI-COMPROMISED RECEPTOR-LIKE CYTOPLASMIC KINASE 2 {ECO:0000305};	W4H4D2_9STRA, SubName: Full=AGC protein kinase {ECO:0000313|EMBL:ETV86752.1};
TRINITY_DN100611_c2_g1	0	0.451	0	0	0.92	0	--	--	--	--	--	--
TRINITY_DN100612_c0_g1	0.398	0	0	0	0	0	--	--	--	--	--	--
TRINITY_DN100613_c0_g1	0.159	0.05	0	0.113	0.186	0.125	GO:0005737,cytoplasm; GO:0005730,nucleolus; GO:0005634,nucleus; GO:0003723,RNA binding; GO:0000179,rRNA (adenine-N6,N6-)-dimethyltransferase activity; GO:0051301,cell division; GO:0001708,cell fate specification	K14191: DIM1; 18S rRNA (adenine1779-N6/adenine1780-N6)-dimethyltransferase [EC:2.1.1.183]	YPL266w	gb|POE74394.1|	DIM1A_ARATH, RecName: Full=Ribosomal RNA small subunit methyltransferase {ECO:0000305}; EC=2.1.1.- {ECO:0000269|PubMed:22829145}; AltName: Full=18S nuclear rRNA (adenine(1785)-N(6)/adenine(1786)-N(6))-dimethyltransferase {ECO:0000305}; AltName: Full=Adenosine dimethyl transferase 1A {ECO:0000305}; AltName: Full=Dimethyladenosine transferase 1A {ECO:0000303|PubMed:19929881};	B8LLX1_PICSI, RecName: Full=rRNA adenine N(6)-methyltransferase {ECO:0000256|RuleBase:RU362106}; EC=2.1.1.- {ECO:0000256|RuleBase:RU362106};
TRINITY_DN100615_c0_g1	0	0.14	0	0.038	0.062	0.029	GO:0030126,COPI vesicle coat; GO:0000139,Golgi membrane; GO:0005198,structural molecule activity; GO:0006886,intracellular protein transport; GO:0016192,vesicle-mediated transport	K17267: COPG; coatomer subunit gamma	Hs6912320	gb|POE89952.1|	COPG2_ORYSJ, RecName: Full=Coatomer subunit gamma-2; AltName: Full=Gamma-2-coat protein; Short=Gamma-2-COP;	A0A061RA30_9CHLO, RecName: Full=Coatomer subunit gamma {ECO:0000256|PIRNR:PIRNR037093};
TRINITY_DN100616_c0_g1	0	1.875	0	0	0	0	--	--	--	--	--	--
TRINITY_DN100617_c0_g1	3.352	0	0	0	1.52	0	--	--	--	--	--	--
TRINITY_DN100619_c0_g1	0.647	0	0	0	0	0	--	--	--	--	--	--
TRINITY_DN10061_c0_g1	0	0	0	0	0	0	--	--	--	--	--	--
TRINITY_DN100621_c0_g1	0	0	0.214	0.198	0	0.73	--	--	--	--	--	--
TRINITY_DN100623_c0_g1	5.412	0	0	0	0	0	--	--	--	--	--	--
TRINITY_DN100624_c0_g1	0	0	0	0	0	0	--	--	--	--	--	--
TRINITY_DN100625_c0_g1	0	0.181	0	0	0.383	0.221	--	--	--	gb|POE53266.1|	--	--
TRINITY_DN100626_c0_g1	0	0	0	0	0	0	GO:0005829,cytosol; GO:0061630,ubiquitin protein ligase activity; GO:0009737,response to abscisic acid; GO:0009651,response to salt stress; GO:0006511,ubiquitin-dependent protein catabolic process	K22379: RNFT1; E3 ubiquitin-protein ligase RNFT1 [EC:2.3.2.27]	At3g47160	gb|KQJ97312.1|	AIRP2_ARATH, RecName: Full=E3 ubiquitin-protein ligase AIRP2 {ECO:0000305}; EC=2.3.2.27 {ECO:0000269|PubMed:21969385}; AltName: Full=Protein ABA INSENSITIVE RING PROTEIN 2 {ECO:0000303|PubMed:21969385}; Short=AtAIRP2 {ECO:0000303|PubMed:21969385}; AltName: Full=RING-type E3 ubiquitin transferase AIRP2 {ECO:0000305};	A0A0Q3HUV3_BRADI, SubName: Full=Uncharacterized protein {ECO:0000313|EMBL:KQJ97314.1};
TRINITY_DN100627_c0_g1	0.507	0	0	0	0	0	--	K01278: DPP4, CD26; dipeptidyl-peptidase 4 [EC:3.4.14.5]	At5g24260	ref|XP_008347315.2|	--	M0RID1_MUSAM, SubName: Full=Uncharacterized protein {ECO:0000313|EnsemblPlants:GSMUA_Achr10P15050_001};
TRINITY_DN100628_c0_g1	0.099	0.16	0	0	0.093	0.096	--	--	--	gb|POE93506.1|	--	--
TRINITY_DN100630_c0_g1	3.362	0	0.182	0	0	0	--	--	7299933	--	--	D8LQE8_ECTSI, SubName: Full=Uncharacterized protein {ECO:0000313|EMBL:CBN78712.1};
TRINITY_DN100631_c0_g1	0.219	0.411	0	0.057	0	0.106	--	--	--	--	--	--
TRINITY_DN100631_c0_g2	0.219	0.722	0	0	0	0	--	--	--	--	--	--
TRINITY_DN100632_c0_g1	0.617	0	0	0	0	0	--	K11291: NASP; nuclear autoantigenic sperm protein	At4g37210	ref|XP_020096464.1|	--	F2ECH2_HORVV, SubName: Full=Predicted protein {ECO:0000313|EMBL:BAK05044.1};
TRINITY_DN100633_c1_g1	0	0	0	0	0	0	--	--	--	--	--	--
TRINITY_DN100634_c1_g1	0	0	0	0	0	0	--	--	--	--	--	--
TRINITY_DN100636_c0_g1	0	0	0	0	0	0	--	--	--	--	--	--
TRINITY_DN100639_c0_g1	1.363	0	0	0	0	0	--	--	--	--	--	--
TRINITY_DN100639_c1_g1	0.736	0	0	0	0	0	--	--	--	--	--	--
TRINITY_DN100640_c0_g1	0	0	0	0	0	6.283	--	--	--	--	--	--
TRINITY_DN100641_c0_g1	0	0	0.578	0.264	0	0	--	--	--	--	--	--
TRINITY_DN100641_c0_g2	0.08	0	0	0.292	0.165	0	--	--	--	--	--	--
TRINITY_DN100641_c1_g1	0.189	0	0	0	0.176	0	--	--	--	--	--	--
TRINITY_DN100643_c0_g1	2.567	0	0	0	0	0	--	--	--	--	--	--
TRINITY_DN100644_c0_g1	0.099	0.12	0	0.17	0.093	0.154	--	--	YLR324w	gb|POF13346.1|	--	--
TRINITY_DN100646_c0_g1	0	0	0	0	1.789	0	--	--	--	--	--	--
TRINITY_DN100647_c0_g1	1.343	0	0	0	0	0	--	--	--	--	--	--
TRINITY_DN100648_c0_g1	0	1.053	0	0	0	0	--	--	--	--	--	--
TRINITY_DN100652_c0_g1	0.05	0.08	0.064	0	0.093	0.096	--	--	--	--	--	--
TRINITY_DN100652_c1_g1	0.189	0	0.493	0.226	0.92	0	--	--	--	--	--	--
TRINITY_DN100653_c0_g1	1.323	0	0	0	0	0	--	--	--	--	--	--
TRINITY_DN100655_c0_g1	0	0	0	0	0	0	--	--	--	--	--	--
TRINITY_DN100656_c0_g1	1.333	0	0	0	0	0	GO:0016021,integral component of membrane; GO:0046872,metal ion binding; GO:0061630,ubiquitin protein ligase activity; GO:0043161,proteasome-mediated ubiquitin-dependent protein catabolic process	K19040: ATL76S; E3 ubiquitin-protein ligase ATL10/75/76/77/78 [EC:2.3.2.27]	At5g47610	gb|PKA50197.1|	ATL79_ARATH, RecName: Full=RING-H2 finger protein ATL79; EC=2.3.2.27 {ECO:0000305}; AltName: Full=RING-type E3 ubiquitin transferase ATL79 {ECO:0000305}; Flags: Precursor;	A0A2I0A3S1_9ASPA, SubName: Full=RING-H2 finger protein ATL79 {ECO:0000313|EMBL:PKA50197.1};
TRINITY_DN100657_c0_g1	0	0.632	0	0	0	0	--	--	--	--	--	--
TRINITY_DN100658_c0_g1	0.139	0.241	0	0	0.134	0	--	--	--	--	--	--
TRINITY_DN100659_c0_g1	0.955	0	0	0	0	0	--	--	--	--	--	--
TRINITY_DN10065_c0_g1	0.139	0.03	0.268	0.094	0.114	0.048	--	--	--	--	--	--
TRINITY_DN100662_c0_g1	0	0	1.906	0	0	0	--	--	--	--	--	--
TRINITY_DN100663_c0_g1	0	0	0	0	1.127	0	--	--	--	--	--	--
TRINITY_DN100664_c0_g1	1.154	0	0	0	0	0	--	--	--	--	--	--
TRINITY_DN100664_c0_g2	0	0.211	0	0	0	0	GO:0005634,nucleus; GO:0016514,SWI/SNF complex; GO:0003677,DNA binding; GO:0006338,chromatin remodeling; GO:0016569,covalent chromatin modification; GO:0007275,multicellular organism development; GO:0006355,regulation of transcription, DNA-templated; GO:0006351,transcription, DNA-templated	K11649: SMARCC; SWI/SNF related-matrix-associated actin-dependent regulator of chromatin subfamily C	Hs21237808	gb|POE94679.1|	SWI3B_ARATH, RecName: Full=SWI/SNF complex subunit SWI3B; Short=AtSWI3B; AltName: Full=Transcription regulatory protein SWI3B;	M1VI35_CYAM1, SubName: Full=SWI/SNF related, matrix associated, actin dependent regulator of chromatin, subfamily c {ECO:0000313|EMBL:BAM80683.1};
TRINITY_DN100665_c0_g1	0	0.361	0	0	0	0	--	--	--	--	--	--
TRINITY_DN100666_c0_g1	0.537	0	0	0	0	0	--	--	--	--	--	--
TRINITY_DN100668_c0_g1	0.448	0	0	0	0	0.509	--	--	--	--	--	--
TRINITY_DN100668_c0_g2	0	0	0	0.763	0	0	--	--	--	--	--	--
TRINITY_DN100669_c0_g1	1.303	0	0	0	0	0	--	--	--	--	--	--
TRINITY_DN100669_c1_g1	0	0	0	0	0	0	--	--	--	--	--	--
TRINITY_DN10066_c0_g1	0	1.815	0	0	0.713	0	--	--	--	--	--	--
TRINITY_DN100670_c0_g1	0.179	0.231	0.15	0.057	0	0	--	--	--	--	--	--
TRINITY_DN100670_c1_g1	0.109	0	0	0	0.052	0.058	--	--	--	--	--	--
TRINITY_DN100672_c0_g1	0	0	0	0.217	0.217	0	--	--	--	gb|EMS35708.1|	--	A0A1D5TQ31_WHEAT, SubName: Full=Uncharacterized protein {ECO:0000313|EnsemblPlants:TRIAE_CS42_2AS_TGACv1_113957_AA0362730.1};
TRINITY_DN100673_c0_g1	0	0	0	0	0	1.844	--	--	--	--	--	--
TRINITY_DN100674_c0_g1	0	0	0	0	0	0	--	--	--	--	--	--
TRINITY_DN100675_c0_g1	0	0	0	0.792	0	1.527	--	--	--	--	--	--
TRINITY_DN100676_c0_g1	0	0	0	0	0	0	--	--	--	--	--	--
TRINITY_DN100676_c0_g2	0	0	0	0	0	0	--	--	--	--	--	--
TRINITY_DN100677_c0_g1	0	1.544	0	0	0	0	--	--	--	--	--	--
TRINITY_DN100678_c0_g1	0	0	0	0	0	0	--	--	--	--	--	--
TRINITY_DN100680_c0_g1	0.448	0	0	0	0	0	--	--	--	--	--	--
TRINITY_DN100682_c0_g1	0	0.16	0	0	0.186	0	--	--	--	gb|POF13324.1|	--	--
TRINITY_DN100683_c0_g1	0.487	0	0	0	0	0	--	--	--	--	--	--
TRINITY_DN100684_c0_g1	0	0	0	0	0.145	0	GO:0080008,Cul4-RING E3 ubiquitin ligase complex; GO:0000118,histone deacetylase complex; GO:0005634,nucleus; GO:0003714,transcription corepressor activity; GO:0016575,histone deacetylation; GO:0006357,regulation of transcription by RNA polymerase II; GO:0009409,response to cold; GO:0006351,transcription, DNA-templated	K14018: PLAA, DOA1, UFD3; phospholipase A-2-activating protein	SPBC887.04c	gb|POF22183.1|	HOS15_ARATH, RecName: Full=WD40 repeat-containing protein HOS15 {ECO:0000305}; AltName: Full=HIGH OSMOTIC STRESS GENE EXPRESSION 15 {ECO:0000303|PubMed:18356294};	L1JP87_GUITH, SubName: Full=Uncharacterized protein {ECO:0000313|EMBL:EKX49868.1, ECO:0000313|EnsemblProtists:EKX49868};
TRINITY_DN100685_c0_g1	0.099	0	0	0.17	0.29	0.106	GO:0005794,Golgi apparatus; GO:0016021,integral component of membrane; GO:0005886,plasma membrane; GO:0009506,plasmodesma; GO:0005524,ATP binding; GO:0004675,transmembrane receptor protein serine/threonine kinase activity; GO:0007166,cell surface receptor signaling pathway; GO:0006468,protein phosphorylation	K00924: E2.7.1.-; kinase [EC:2.7.1.-]	At3g23750	ref|XP_021749640.1|	TMK4_ARATH, RecName: Full=Receptor-like kinase TMK4 {ECO:0000303|PubMed:23613767}; EC=2.7.11.1 {ECO:0000305}; AltName: Full=BAK1-associating receptor-like kinase 1 {ECO:0000303|PubMed:23921992}; AltName: Full=Leucine-rich repeat receptor-like kinases TMK4 {ECO:0000303|PubMed:23613767}; AltName: Full=Transmembrane kinase 4 {ECO:0000303|PubMed:23613767}; Flags: Precursor;	A0A0K9RIU5_SPIOL, SubName: Full=Uncharacterized protein {ECO:0000313|EMBL:KNA19431.1};
TRINITY_DN100687_c0_g1	0	0.02	0	0	0.155	0.173	GO:0005886,plasma membrane; GO:0043531,ADP binding; GO:0005524,ATP binding; GO:0006952,defense response; GO:0007165,signal transduction	K19613: SHOC2, SUR8; leucine-rich repeat protein SHOC2	At3g14460	gb|EAZ03477.1|	DRL21_ARATH, RecName: Full=Putative disease resistance protein At3g14460;	A0A0A9HJX9_ARUDO, SubName: Full=Uncharacterized protein {ECO:0000313|EMBL:JAE33198.1};
TRINITY_DN100688_c0_g1	1.224	0	0	0	0	0	--	--	--	--	--	--
TRINITY_DN100688_c1_g1	0.298	0	0	0	0	0	--	--	--	--	--	--
TRINITY_DN100689_c0_g1	0	0	0	0	0	0	--	--	--	--	--	--
TRINITY_DN100691_c0_g1	1.82	0	0	0	0	0	--	--	--	--	--	--
TRINITY_DN100692_c0_g1	0	0.331	0	0.528	0	0	--	--	--	--	--	--
TRINITY_DN100693_c0_g1	0	0	0	0	0	0	--	--	--	--	--	--
TRINITY_DN100694_c0_g1	0	1.254	0	0.81	0.838	0.596	GO:0009507,chloroplast; GO:0005739,mitochondrion; GO:0005840,ribosome; GO:0019843,rRNA binding; GO:0003735,structural constituent of ribosome; GO:0006412,translation	K02906: RP-L3, MRPL3, rplC; large subunit ribosomal protein L3	YGR220c	gb|POF16503.1|	RK3B_ARATH, RecName: Full=50S ribosomal protein L3-2, chloroplastic; Flags: Precursor;	W4GYX6_9STRA, SubName: Full=50S ribosomal protein L3 {ECO:0000313|EMBL:ETV84867.1};
TRINITY_DN100695_c0_g1	0.318	0	0	0	0	0.423	--	--	--	--	--	--
TRINITY_DN100697_c0_g1	0	0.451	0	0	0	0	--	--	--	--	--	--
TRINITY_DN100701_c0_g1	0.428	0	0	0	0	0	--	--	--	--	--	--
TRINITY_DN100702_c0_g1	0.706	0.13	0.321	0	0	0	--	--	Hs7304923	--	--	--
TRINITY_DN100703_c0_g1	0.895	0	0	0	0	0	--	K01191: MAN2C1; alpha-mannosidase [EC:3.2.1.24]	At3g24740	gb|KVI03835.1|	--	M0U683_MUSAM, SubName: Full=Uncharacterized protein {ECO:0000313|EnsemblPlants:GSMUA_AchrUn_randomP04210_001};
TRINITY_DN100704_c0_g1	0	0	0	0	0.434	0	--	--	--	--	--	--
TRINITY_DN100705_c0_g1	0	0.09	0	0.396	0.331	0	--	--	SPCC285.10c	gb|POE94724.1|	--	--
TRINITY_DN100706_c0_g1	0	0	0	0	0	1.124	--	--	--	--	--	--
TRINITY_DN100707_c0_g1	0	0	0	0.452	0	0.432	--	--	--	--	--	--
TRINITY_DN100708_c0_g1	0.468	0	0	0	0	0	GO:0009898,cytoplasmic side of plasma membrane; GO:0005783,endoplasmic reticulum; GO:0005789,endoplasmic reticulum membrane; GO:0005524,ATP binding; GO:0004672,protein kinase activity; GO:0004674,protein serine/threonine kinase activity; GO:0004712,protein serine/threonine/tyrosine kinase activity; GO:0004871,signal transducer activity; GO:0045087,innate immune response; GO:0035556,intracellular …	K21434: ANKRD2; ankyrin repeat domain-containing protein 2	At3g59830	ref|XP_018839365.1|	ILK1_ARATH, RecName: Full=Integrin-linked protein kinase 1 {ECO:0000303|PubMed:27208244}; EC=2.7.11.1 {ECO:0000269|PubMed:27208244}; AltName: Full=Ankyrin protein kinase 1 {ECO:0000303|PubMed:12650621};	A0A2I4G659_9ROSI, SubName: Full=serine/threonine-protein kinase STY17-like {ECO:0000313|RefSeq:XP_018839365.1};
TRINITY_DN100709_c0_g1	0	0.04	0	0	0.145	0.077	--	--	--	--	--	--
TRINITY_DN10070_c0_g1	0	0	0	0	0	0	GO:0005739,mitochondrion; GO:0004124,cysteine synthase activity; GO:0050017,L-3-cyanoalanine synthase activity; GO:0016740,transferase activity; GO:0019499,cyanide metabolic process; GO:0006535,cysteine biosynthetic process from serine	K01738: cysK; cysteine synthase [EC:2.5.1.47]	SPAC3A12.17c	gb|POF25971.1|	CAS2_SOLTU, RecName: Full=Bifunctional L-3-cyanoalanine synthase/cysteine synthase 2, mitochondrial; EC=2.5.1.47; EC=4.4.1.9; Flags: Precursor;	A0A067D0S0_SAPPC, SubName: Full=Uncharacterized protein {ECO:0000313|EMBL:KDO32361.1};
TRINITY_DN100710_c0_g1	0	0	0	0.565	0	0.173	--	--	--	--	--	--
TRINITY_DN100711_c0_g1	0	0	0	0	0	0	--	--	--	--	--	--
TRINITY_DN100712_c0_g1	0	0	0	1.461	0	0	--	--	--	--	--	--
TRINITY_DN100713_c0_g1	0	0	0	0	0	0	--	--	--	--	--	--
TRINITY_DN100713_c0_g2	0.239	0.03	0	0.132	0	0	--	--	--	--	--	--
TRINITY_DN100714_c0_g1	0	0.02	0	0.141	0.124	0	--	--	--	--	--	--
TRINITY_DN100715_c0_g1	0.318	0	0.439	0.075	0	0	--	--	--	--	--	--
TRINITY_DN100716_c0_g1	0	0	1.296	0	0	1.105	--	--	--	--	--	--
TRINITY_DN100717_c0_g1	0.229	0	0.15	0.132	0	0	GO:0048046,apoplast; GO:0009507,chloroplast; GO:0009570,chloroplast stroma; GO:0005737,cytoplasm; GO:0009506,plasmodesma; GO:0005524,ATP binding; GO:0050203,oxalate-CoA ligase activity; GO:0050832,defense response to fungus; GO:0033611,oxalate catabolic process; GO:0010030,positive regulation of seed germination; GO:0046686,response to cadmium ion; GO:0009735,response to cytokinin; GO:0010214,see…	K22133: AAE3; oxalate---CoA ligase [EC:6.2.1.8]	At3g48990	ref|XP_010055622.1|	4CLLA_ARATH, RecName: Full=Oxalate--CoA ligase {ECO:0000305}; EC=6.2.1.8 {ECO:0000269|PubMed:22447686}; AltName: Full=4-coumarate--CoA ligase isoform 8; Short=At4CL8; AltName: Full=4-coumarate--CoA ligase-like 10; AltName: Full=Acyl-activating enzyme 3 {ECO:0000303|PubMed:22447686}; AltName: Full=Adenosine monophosphate binding protein 3; Short=AtMPBP3; AltName: Full=Oxalyl-CoA synthetase;	A0A059C1P9_EUCGR, SubName: Full=Uncharacterized protein {ECO:0000313|EMBL:KCW72131.1};
TRINITY_DN100719_c0_g1	0	1.976	0	0	0	0	--	--	--	--	--	--
TRINITY_DN10071_c0_g1	0	0.241	0	0.113	0.093	0	--	--	--	--	--	--
TRINITY_DN100720_c0_g1	0	0	0	0	0	0	GO:0005783,endoplasmic reticulum; GO:0005789,endoplasmic reticulum membrane; GO:0016021,integral component of membrane; GO:0016020,membrane; GO:0005773,vacuole; GO:0030170,pyridoxal phosphate binding; GO:0004758,serine C-palmitoyltransferase activity; GO:0009640,photomorphogenesis; GO:0009555,pollen development; GO:0043067,regulation of programmed cell death; GO:0046512,sphingosine biosynthetic p…	K00654: SPT; serine palmitoyltransferase [EC:2.3.1.50]	YDR062w	gb|POE85075.1|	LCB2A_ARATH, RecName: Full=Long chain base biosynthesis protein 2a; Short=AtLCB2a; EC=2.3.1.50; AltName: Full=Long chain base biosynthesis protein 2; Short=AtLCB2;	L1IB67_GUITH, SubName: Full=Uncharacterized protein {ECO:0000313|EMBL:EKX33302.1, ECO:0000313|EnsemblProtists:EKX33302};
TRINITY_DN100722_c0_g1	0.885	0	0	0	0	0	GO:0005737,cytoplasm; GO:0005634,nucleus; GO:0005524,ATP binding; GO:0004707,MAP kinase activity; GO:0006952,defense response; GO:0010468,regulation of gene expression	K20538: MPK8; mitogen-activated protein kinase 8 [EC:2.7.11.24]	At3g18040	ref|XP_003634202.1|	MPK12_ORYSJ, RecName: Full=Mitogen-activated protein kinase 12; Short=MAP kinase 12; EC=2.7.11.24; AltName: Full=Blast- and wound-induced MAP kinase 1; AltName: Full=MAP kinase 1; AltName: Full=OsBWMK1; AltName: Full=OsMAPK1;	D7SJ91_VITVI, RecName: Full=Mitogen-activated protein kinase {ECO:0000256|SAAS:SAAS00652812}; EC=2.7.11.24 {ECO:0000256|SAAS:SAAS00652812};
TRINITY_DN100723_c0_g1	0.925	0.702	0	0	0	0.221	GO:0009507,chloroplast; GO:0016020,membrane; GO:0031966,mitochondrial membrane; GO:0005747,mitochondrial respiratory chain complex I; GO:0005739,mitochondrion; GO:0045271,respiratory chain complex I; GO:0016651,oxidoreductase activity, acting on NAD(P)H; GO:0009853,photorespiration; GO:0022904,respiratory electron transport chain	K03949: NDUFA5; NADH dehydrogenase (ubiquinone) 1 alpha subcomplex subunit 5	CE05347	gb|POE87987.1|	NDUA5_ARATH, RecName: Full=Probable NADH dehydrogenase [ubiquinone] 1 alpha subcomplex subunit 5, mitochondrial; Flags: Precursor;	A0A1D1XDW4_9ARAE, SubName: Full=NADH dehydrogenase [ubiquinone] 1 alpha subcomplex subunit 5 {ECO:0000313|EMBL:JAT40411.1}; Flags: Fragment;
TRINITY_DN100724_c1_g1	1.005	0	0	0	0	0	--	--	--	--	--	--
TRINITY_DN100726_c0_g1	0.05	0.14	0.246	0.188	0.072	0.144	--	--	--	--	--	--
TRINITY_DN100727_c0_g1	0.01	0	0.118	0.311	0	0	--	--	--	--	--	--
TRINITY_DN100728_c0_g1	0.746	0	0	0	0	0	GO:0005829,cytosol; GO:0005730,nucleolus; GO:0005634,nucleus; GO:0005681,spliceosomal complex; GO:0005685,U1 snRNP; GO:0035614,snRNA stem-loop binding; GO:0030619,U1 snRNA binding; GO:0000398,mRNA splicing, via spliceosome	K11091: SNRPA; U1 small nuclear ribonucleoprotein A	At2g47580	ref|XP_009381854.1|	RU1A_ARATH, RecName: Full=U1 small nuclear ribonucleoprotein A; Short=U1 snRNP protein A;	A0A199VWI7_ANACO, SubName: Full=U1 small nuclear ribonucleoprotein A {ECO:0000313|EMBL:OAY81358.1};
TRINITY_DN100730_c0_g1	0	0	0	0	0	0	--	--	--	--	--	--
TRINITY_DN100731_c0_g1	0	0	0	0	0	0	--	--	--	--	--	--
TRINITY_DN100731_c0_g2	0	0	0	0	0.703	0	--	--	--	--	--	--
TRINITY_DN100732_c0_g1	0.865	0	0	0	0	0	--	--	--	--	--	--
TRINITY_DN100732_c1_g1	0	0.913	0	0	0	0	--	--	--	--	--	--
TRINITY_DN100733_c0_g1	0.706	0.191	0	0	0	0	--	--	--	--	--	--
TRINITY_DN100734_c0_g1	0.239	0	0	0	0	0	--	--	--	--	--	--
TRINITY_DN100736_c0_g1	0.06	0.181	0.214	0	0	0	--	--	--	--	--	--
TRINITY_DN100739_c0_g1	0.07	0	0	0	0.207	0	GO:0033879,acetylajmaline esterase activity; GO:0009820,alkaloid metabolic process	K21026: AAE; acetylajmaline esterase [EC:3.1.1.80]	At5g45910	ref|XP_010683535.1|	AAE_RAUSE, RecName: Full=Acetylajmalan esterase {ECO:0000303|PubMed:16133216}; EC=3.1.1.80; Flags: Precursor;	A0A0K9RWE2_SPIOL, SubName: Full=Uncharacterized protein {ECO:0000313|EMBL:KNA23229.1};
TRINITY_DN100739_c0_g2	0	0.02	0	0	0.227	0.134	GO:0005576,extracellular region; GO:0016788,hydrolase activity, acting on ester bonds; GO:0016042,lipid catabolic process	K21026: AAE; acetylajmaline esterase [EC:3.1.1.80]	At5g03980	ref|XP_021723193.1|	GDL74_ARATH, RecName: Full=GDSL esterase/lipase At5g03980; EC=3.1.1.-; AltName: Full=Extracellular lipase At5g03980; Flags: Precursor;	A0A0K9QBC4_SPIOL, SubName: Full=Uncharacterized protein {ECO:0000313|EMBL:KNA04560.1};
TRINITY_DN10073_c0_g1	0	0	0	0	3.919	0	--	--	--	--	--	--
TRINITY_DN100740_c0_g1	0	0	0	0	0.558	0.211	--	--	--	--	--	--
TRINITY_DN100741_c0_g1	0.03	0	0	0.038	0.114	0.269	GO:0009507,chloroplast; GO:0005524,ATP binding; GO:0008298,intracellular mRNA localization	K01934: MTHFS; 5-formyltetrahydrofolate cyclo-ligase [EC:6.3.3.2]	At1g76730	ref|XP_015967975.1|	5FCLL_ARATH, RecName: Full=5-formyltetrahydrofolate cyclo-ligase-like protein COG0212; AltName: Full=Protein CLUSTERS OF ORTHOLOGOUS GROUP 212; Flags: Precursor;	W9SJR4_9ROSA, SubName: Full=Methenyltetrahydrofolate synthase domain-containing protein {ECO:0000313|EMBL:EXC12326.1};
TRINITY_DN100742_c0_g1	0	2.728	0	0	0	0	--	--	--	--	--	--
TRINITY_DN100743_c0_g1	2.298	0.14	0.182	0	0.031	0	--	--	--	--	--	--
TRINITY_DN100744_c0_g1	0	0	0	0	0	0	--	--	--	--	--	--
TRINITY_DN100750_c0_g1	0	0	0	0	0	0	--	--	--	--	--	--
TRINITY_DN100750_c1_g1	0.03	0	0.075	0.236	0.114	0.154	--	K14556: DIP2, UTP12, WDR3; U3 small nucleolar RNA-associated protein 12	SPBC3D6.12	gb|POF19972.1|	--	W4H9J3_9STRA, SubName: Full=Uncharacterized protein {ECO:0000313|EMBL:ETV87793.1};
TRINITY_DN100751_c0_g1	0.279	0	0	0.613	0	0.307	--	--	--	--	--	--
TRINITY_DN100752_c0_g1	0	0	0	3.901	0	0	--	--	--	--	--	--
TRINITY_DN100753_c0_g1	0.796	0.491	0	0	0	0	--	--	--	--	--	--
TRINITY_DN100755_c0_g1	0	0	0.439	0.396	0.321	0	--	--	--	--	--	--
TRINITY_DN100756_c0_g1	0	0	0.3	0	0	0.749	--	--	--	--	--	--
TRINITY_DN100758_c0_g1	0	0	0	0	0	0	--	--	--	--	--	--
TRINITY_DN100759_c0_g1	1.174	0	0	0	0	0	--	--	--	--	--	--
TRINITY_DN10075_c0_g1	0.199	0	0	0	0.114	0.048	--	--	--	--	--	--
TRINITY_DN100760_c0_g1	0.597	0	0	0	0	0	--	--	At3g13410	ref|XP_010931445.1|	--	A0A2H3Y374_PHODC, SubName: Full=uncharacterized protein LOC103709101 isoform X1 {ECO:0000313|RefSeq:XP_008792519.1};
TRINITY_DN100763_c0_g1	0	0	0	0	0.465	0	--	--	--	--	--	--
TRINITY_DN100767_c0_g1	0	0	0.407	0.368	0	0	--	--	--	--	--	--
TRINITY_DN100768_c0_g1	0.557	0	0	0	0	0	--	--	--	--	--	--
TRINITY_DN100768_c1_g1	2.079	0	0	0	0	0	--	--	--	--	--	--
TRINITY_DN100769_c0_g1	0.229	0.411	0	0	0	0	--	--	--	--	--	--
TRINITY_DN10076_c0_g1	0.189	0.14	0.139	0.132	0	0.029	--	--	--	--	--	--
TRINITY_DN100770_c0_g1	0.617	0	0	0	0	0	--	--	--	--	--	--
TRINITY_DN100771_c0_g1	0	0.201	0.3	0	0.217	0	--	--	--	--	--	--
TRINITY_DN100772_c0_g1	0	0	0	0	0	0.403	--	--	--	--	--	--
TRINITY_DN100772_c0_g2	0	0	0	0	1.789	1.124	--	--	--	--	--	--
TRINITY_DN100773_c0_g1	0.07	0	0	0.32	0.134	0	--	--	--	--	--	--
TRINITY_DN100775_c0_g1	0	0	0	0	0.383	0.922	--	--	--	--	--	--
TRINITY_DN100776_c0_g1	2.855	0	0	0	0	0	--	--	--	--	--	--
TRINITY_DN100776_c0_g2	0	0	2.356	0	0	0	--	--	--	--	--	--
TRINITY_DN100777_c0_g1	0.856	0	0	0	0	0	--	--	--	--	--	--
TRINITY_DN100778_c0_g1	0.577	0.521	0	0	0	0	--	--	--	--	--	--
TRINITY_DN100779_c0_g1	0	0.09	0.278	0	0.052	0.058	--	--	--	--	--	--
TRINITY_DN10077_c0_g1	1.273	0	0	0	0	0	--	--	--	--	--	--
TRINITY_DN100781_c0_g1	0.08	0	0	0.462	0	0.25	GO:0005737,cytoplasm; GO:0004459,L-lactate dehydrogenase activity; GO:0005975,carbohydrate metabolic process; GO:0019752,carboxylic acid metabolic process	K00016: LDH, ldh; L-lactate dehydrogenase [EC:1.1.1.27]	At4g17260	ref|XP_020685439.1|	LDHB_HORVU, RecName: Full=L-lactate dehydrogenase B; Short=LDH-B; EC=1.1.1.27; Flags: Fragment;	H9MAI1_PINRA, SubName: Full=Uncharacterized protein {ECO:0000313|EMBL:AEW08127.1}; Flags: Fragment;
TRINITY_DN100782_c0_g1	0	0	0	0	0	0	--	--	--	--	--	--
TRINITY_DN100783_c0_g1	0.229	0.17	0	0	0.041	0	--	--	--	gb|POE54425.1|	--	--
TRINITY_DN100784_c0_g1	0	0	0	0	0	0	--	--	--	--	--	--
TRINITY_DN100784_c1_g1	0.408	0.181	0.268	0	0	0.221	--	--	--	--	--	--
TRINITY_DN100785_c0_g1	0.975	0	0	0	0	0	--	--	--	--	--	--
TRINITY_DN100787_c0_g1	0	1.544	0	0	0	0	--	--	--	--	--	--
TRINITY_DN100789_c1_g1	0	0.371	0	0	0	0	--	--	--	--	--	--
TRINITY_DN100791_c0_g1	0	0	0	0	0	3.91	--	--	--	--	--	--
TRINITY_DN100791_c1_g1	0.995	0	0	0	0	0	--	--	--	--	--	--
TRINITY_DN100793_c0_g1	0	0	0	0	0.372	0.279	GO:0016021,integral component of membrane; GO:0005886,plasma membrane; GO:0005524,ATP binding; GO:0004675,transmembrane receptor protein serine/threonine kinase activity; GO:0007166,cell surface receptor signaling pathway; GO:0006468,protein phosphorylation	K04733: IRAK4; interleukin-1 receptor-associated kinase 4 [EC:2.7.11.1]	At1g49270	ref|XP_022001725.1|	PERK7_ARATH, RecName: Full=Proline-rich receptor-like protein kinase PERK7; EC=2.7.11.1; AltName: Full=Proline-rich extensin-like receptor kinase 7; Short=AtPERK7;	A0A251SUA0_HELAN, SubName: Full=Putative serine/threonine-protein kinase, active site protein {ECO:0000313|EMBL:OTG02189.1};
TRINITY_DN100795_c0_g1	0.209	0.361	0	0	0	0	--	--	--	--	--	--
TRINITY_DN100796_c0_g1	0	0	0	0	0	0	--	--	--	--	--	--
TRINITY_DN100797_c0_g1	0	0	0	0	0	0	--	--	--	--	--	--
TRINITY_DN100797_c0_g2	0	0.281	0	0	0.6	0.451	--	--	--	--	--	--
TRINITY_DN1007_c0_g1	0.259	0.331	0.493	0.669	0	0	--	--	--	--	--	--
TRINITY_DN100800_c0_g1	0.517	0	0	0	0	0	--	--	At4g12070	ref|XP_015610812.1|	--	A0A0E0QP28_ORYRU, SubName: Full=Uncharacterized protein {ECO:0000313|EnsemblPlants:ORUFI09G04030.1};
TRINITY_DN100801_c0_g1	0.418	0	0	0	0	0	--	--	--	--	--	--
TRINITY_DN100802_c0_g1	1.621	0	4.498	0	0	0	--	--	--	--	--	--
TRINITY_DN100803_c0_g1	0.109	0	0.075	0	0.052	0.067	--	K17616: CTDSPL2; CTD small phosphatase-like protein 2 [EC:3.1.3.-]	At3g05500	ref|XP_021772877.1|	SRP_VITRI, RecName: Full=Stress-related protein;	A0A0K9QJW4_SPIOL, SubName: Full=Uncharacterized protein {ECO:0000313|EMBL:KNA06993.1};
TRINITY_DN100804_c0_g1	0	0	0	0	0	0	--	--	--	--	--	--
TRINITY_DN100805_c0_g1	0	0	0	0	0	0	--	--	--	--	--	--
TRINITY_DN100805_c1_g1	0	0	0.086	0	0.072	0.144	--	--	--	--	--	--
TRINITY_DN100806_c0_g1	0	0.592	0.289	0	0	0.24	--	--	--	--	--	--
TRINITY_DN10080_c0_g1	1.522	0	0	0	0	0	--	--	--	--	--	--
TRINITY_DN100810_c0_g1	0	0	0.353	0.942	0.258	0	--	--	--	--	--	--
TRINITY_DN100810_c1_g1	0	1.364	0	0	0	0	--	--	--	--	--	--
TRINITY_DN100811_c0_g1	0	0	0	0.094	0	0.596	GO:0005737,cytoplasm; GO:0004022,alcohol dehydrogenase (NAD) activity; GO:0008270,zinc ion binding	K18857: ADH1; alcohol dehydrogenase class-P [EC:1.1.1.1]	SPBC1198.01	ref|XP_005646096.1|	ADH1_PEA, RecName: Full=Alcohol dehydrogenase 1 {ECO:0000303|PubMed:3309331}; EC=1.1.1.1 {ECO:0000269|PubMed:3309331};	I0YT33_COCSC, SubName: Full=GroES-like protein {ECO:0000313|EMBL:EIE21552.1};
TRINITY_DN100811_c0_g2	0	0	0	0	0	1.95	--	--	--	--	--	--
TRINITY_DN100812_c0_g1	0.696	0	0	0	0	0	--	--	--	--	--	--
TRINITY_DN100813_c0_g1	4.864	0	0	0	0	0	--	--	--	--	--	--
TRINITY_DN100814_c0_g1	0	0	0	0	0	0	--	--	--	--	--	--
TRINITY_DN100815_c0_g1	0.726	0	0	0	0	0	--	--	--	--	--	--
TRINITY_DN100816_c0_g1	0.328	0.07	0.096	0	0	0	--	--	--	--	--	--
TRINITY_DN100817_c0_g1	0.209	0.06	0	0.16	0.062	0.067	--	--	--	--	--	--
TRINITY_DN100818_c0_g1	0.119	0.12	0.932	0.141	0.114	0.423	--	--	--	--	--	--
TRINITY_DN100818_c1_g1	0	2.176	0	0	0	0.663	--	--	--	--	--	--
TRINITY_DN100819_c0_g1	0	0.08	0	0.104	0	0	--	--	--	--	--	--
TRINITY_DN10081_c0_g1	0	0	0	0	0.92	0	--	--	--	--	--	--
TRINITY_DN100820_c0_g1	0.378	0	0.064	0.123	0.258	0	GO:0031305,integral component of mitochondrial inner membrane; GO:0017133,mitochondrial electron transfer flavoprotein complex; GO:0005739,mitochondrion; GO:0051539,4 iron, 4 sulfur cluster binding; GO:0009055,electron transfer activity; GO:0004174,electron-transferring-flavoprotein dehydrogenase activity; GO:0046872,metal ion binding; GO:0043783,oxidoreductase activity, oxidizing metal ions with…	K00311: ETFDH; electron-transferring-flavoprotein dehydrogenase [EC:1.5.5.1]	YOR356w	gb|POF01402.1|	ETFQO_ARATH, RecName: Full=Electron transfer flavoprotein-ubiquinone oxidoreductase, mitochondrial; Short=ETF-QO; Short=ETF-ubiquinone oxidoreductase; EC=1.5.5.1; Flags: Precursor;	I0YUD1_COCSC, SubName: Full=Uncharacterized protein {ECO:0000313|EMBL:EIE22000.1};
TRINITY_DN100821_c0_g1	0.229	0.401	0	0	0	0	--	--	--	--	--	--
TRINITY_DN100823_c0_g1	2.049	0	0	0	0	0	--	--	--	--	--	--
TRINITY_DN100824_c0_g1	0	0	0	0	0	0	--	--	--	--	--	--
TRINITY_DN100827_c0_g1	0	0	0	0	0	0.826	--	--	--	--	--	--
TRINITY_DN100827_c0_g2	0	0	0	0	0	0.269	--	--	--	--	--	--
TRINITY_DN100828_c0_g1	0	0.09	0.289	0	0	0	--	--	--	--	--	--
TRINITY_DN100828_c0_g2	0	0	0	0.81	0	0	--	--	--	--	--	--
TRINITY_DN100828_c0_g3	0	0	0	0	0	0.624	--	--	--	--	--	--
TRINITY_DN100829_c0_g1	0	0	0	0.094	0.072	0.163	--	--	--	gb|EMS68103.1|	--	A0A1D5YQF7_WHEAT, SubName: Full=Uncharacterized protein {ECO:0000313|EnsemblPlants:TRIAE_CS42_5AL_TGACv1_377993_AA1250640.2};
TRINITY_DN100829_c0_g2	0	0	0	0	0	0	--	--	--	--	--	--
TRINITY_DN100830_c0_g1	0.796	0	0	0	0	0	--	--	--	--	--	--
TRINITY_DN100831_c0_g1	0	0.421	0	0	0	0	--	--	--	--	--	--
TRINITY_DN100832_c0_g1	1.263	0	0	0	0	0	--	--	--	--	--	--
TRINITY_DN100832_c0_g2	0.726	0	0	0	0	0	--	--	--	--	--	--
TRINITY_DN100834_c0_g1	0.766	0	0	0	0.486	0	--	--	--	--	--	--
TRINITY_DN100834_c1_g1	1.184	0	0	0	0	0	--	--	--	--	--	--
TRINITY_DN100835_c0_g1	0	0	0	0	0	0	--	--	--	--	--	--
TRINITY_DN100835_c1_g1	0	0.251	0	0.339	0	0.461	--	--	--	gb|POE46978.1|	--	F2DLM0_HORVV, SubName: Full=Predicted protein {ECO:0000313|EMBL:BAJ95991.1};
TRINITY_DN100836_c0_g1	0.149	0	0	0	0	0	--	--	--	--	--	--
TRINITY_DN100836_c0_g2	1.423	0	0	0	0	0	--	--	--	--	--	--
TRINITY_DN100837_c0_g1	0	0.481	1.392	0	0	0.596	--	--	--	--	--	--
TRINITY_DN100839_c0_g1	0.05	0.04	0.9	0	0	0.163	--	--	--	--	--	--
TRINITY_DN10083_c0_g1	0	0.481	0	0	0	0	--	--	--	--	--	--
TRINITY_DN100842_c0_g1	0	0.301	0	0	0.114	0.125	GO:0009507,chloroplast; GO:0009570,chloroplast stroma; GO:0009536,plastid; GO:0052924,all-trans-nonaprenyl-diphosphate synthase (geranylgeranyl-diphosphate specific) activity; GO:0046872,metal ion binding; GO:0050347,trans-octaprenyltranstransferase activity; GO:0008299,isoprenoid biosynthetic process; GO:0015979,photosynthesis; GO:0010236,plastoquinone biosynthetic process	K05356: SPS, sds; all-trans-nonaprenyl-diphosphate synthase [EC:2.5.1.84 2.5.1.85]	Hs4758430	gb|POE80829.1|	SPS2_ARATH, RecName: Full=Solanesyl diphosphate synthase 2, chloroplastic; Short=AtSPS2; EC=2.5.1.85; AltName: Full=All-trans-nonaprenyl-diphosphate synthase 2 (geranylgeranyl-diphosphate specific); Flags: Precursor;	D8LJS2_ECTSI, SubName: Full=Uncharacterized protein {ECO:0000313|EMBL:CBN75992.1};
TRINITY_DN100843_c0_g1	0	0	0	0	0.362	0	--	--	--	--	--	--
TRINITY_DN100844_c0_g1	0	0	0	0	0.155	0.173	--	--	SPAC24C9.11	gb|POF14952.1|	--	K0S355_THAOC, SubName: Full=Uncharacterized protein {ECO:0000313|EMBL:EJK53322.1};
TRINITY_DN100844_c0_g2	0.129	0	0	0	0.134	0.403	--	K17583: NOM1; nucleolar MIF4G domain-containing protein 1	Hs22046307	dbj|GAX77898.1|	--	L1JWP0_GUITH, SubName: Full=Uncharacterized protein {ECO:0000313|EMBL:EKX52518.1, ECO:0000313|EnsemblProtists:EKX52518};
TRINITY_DN100849_c0_g1	1.045	0	0	0	0	0	--	--	--	--	--	--
TRINITY_DN100850_c0_g1	0	0	0	0	0	0	--	--	--	--	--	--
TRINITY_DN100851_c0_g1	0.149	0	0.064	0	0.052	0.106	--	--	--	--	--	--
TRINITY_DN100851_c0_g2	0.517	0	0	0	0.248	0	--	--	--	--	--	--
TRINITY_DN100852_c0_g1	0.477	0	0	0	0	0	--	--	--	--	--	--
TRINITY_DN100853_c0_g1	0	0	0	1.395	0	0	--	--	--	--	--	--
TRINITY_DN100857_c0_g1	0	1.053	0	0	0	0	--	--	--	--	--	--
TRINITY_DN100857_c1_g1	0	0.281	0	0	0	0.163	GO:0016021,integral component of membrane	--	SPBC713.11c	gb|POE71915.1|	RC22_ARATH, RecName: Full=UPF0057 membrane protein At2g24040;	A0A087GIE1_ARAAL, SubName: Full=Uncharacterized protein {ECO:0000313|EMBL:KFK29643.1};
TRINITY_DN10085_c0_g1	0	0.542	0	0	0	0	--	--	SPBP22H7.01c	gb|POF13094.1|	--	A0A1D1Z188_9ARAE, SubName: Full=Uncharacterized protein C691.05c {ECO:0000313|EMBL:JAT60660.1}; Flags: Fragment;
TRINITY_DN100860_c0_g1	0	1.324	0	2.563	0	0	--	--	--	--	--	--
TRINITY_DN100861_c0_g1	0.547	0	0	0	0	0	--	--	--	--	--	--
TRINITY_DN100862_c0_g1	0	0	0	0	0	0	--	--	--	--	--	--
TRINITY_DN100862_c0_g2	0	0	0	0	0	0	--	--	--	--	--	--
TRINITY_DN100863_c0_g1	0	0	0	0.198	0	0	--	--	--	--	--	--
TRINITY_DN100863_c0_g2	0	0	0.182	0	0.269	0.144	--	--	--	--	--	--
TRINITY_DN100863_c1_g1	0.159	0	0.064	0.141	0.207	0	--	--	--	--	--	--
TRINITY_DN100866_c0_g1	0	0	0	0.254	0.207	0.576	--	--	--	--	--	--
TRINITY_DN100869_c0_g1	0.348	0	0	0	0	0	GO:0005634,nucleus; GO:0003677,DNA binding; GO:0003700,DNA binding transcription factor activity; GO:0006355,regulation of transcription, DNA-templated; GO:0006351,transcription, DNA-templated	K14491: ARR-B; two-component response regulator ARR-B family	At1g25550	ref|XP_008792589.1|	HHO3_ARATH, RecName: Full=Transcription factor HHO3 {ECO:0000305}; AltName: Full=MYB-domain transcription factor HHO3 {ECO:0000305}; AltName: Full=Protein HRS1 HOMOLOG 3 {ECO:0000305};	A0A2H3Y2T9_PHODC, SubName: Full=myb family transcription factor EFM {ECO:0000313|RefSeq:XP_008792589.1};
TRINITY_DN10086_c0_g1	0	0.211	0	0	0	0	--	--	--	--	--	--
TRINITY_DN100870_c0_g1	0.686	0	0	1.621	0.651	0	--	--	--	--	--	--
TRINITY_DN100870_c1_g1	0	0	0	0	0	0	--	--	--	--	--	--
TRINITY_DN100871_c0_g1	0.766	0.191	0.054	0.188	0	0.211	--	--	--	--	--	--
TRINITY_DN100872_c0_g1	0	0.1	0.075	0.066	0	0.086	--	--	--	gb|POE71340.1|	--	--
TRINITY_DN100873_c0_g1	0.179	0.632	0	0.207	0.176	0	--	--	--	--	--	--
TRINITY_DN100874_c0_g1	0.279	0	0.043	0	0.041	0	--	--	--	--	--	--
TRINITY_DN100875_c0_g1	0	0.241	0	0	0.507	0.298	--	--	--	--	--	--
TRINITY_DN100875_c0_g2	0	0	0	0	0	0	--	--	--	--	--	--
TRINITY_DN100879_c0_g1	0	0	0	0	0	0	--	--	--	--	--	--
TRINITY_DN100879_c0_g2	0.298	0	0	0	0	0	--	--	--	--	--	--
TRINITY_DN10087_c0_g1	0	0	0	0	1.241	0	--	--	--	--	--	--
TRINITY_DN10087_c0_g2	0	0	0	0	0	0.384	--	--	--	--	--	--
TRINITY_DN100880_c1_g1	0	0.893	0	0	0	0	--	--	--	--	--	--
TRINITY_DN100881_c1_g1	0.935	0	0	0	0	0	--	--	--	--	--	--
TRINITY_DN100883_c0_g1	0	0.562	0.675	0	0	0	--	--	--	--	--	--
TRINITY_DN100884_c0_g1	0	0	0.236	0	0	0	--	--	--	--	--	--
TRINITY_DN100885_c0_g1	0	0	0	0	0	2.123	--	--	--	--	--	--
TRINITY_DN100888_c0_g1	1.054	0	0	0	0	0	--	--	--	--	--	--
TRINITY_DN100889_c1_g1	0	0	0	1.753	0	0	--	--	--	--	--	--
TRINITY_DN10088_c0_g1	0.04	0.03	0.15	0.047	0.041	0.077	--	--	--	--	--	--
TRINITY_DN100890_c0_g1	0	0	0	0	0.124	0.672	--	--	--	gb|POF17036.1|	--	--
TRINITY_DN100891_c0_g1	0.398	0	0	0	0	0.144	--	--	--	--	--	--
TRINITY_DN100892_c0_g1	0.637	0	0	0	0	0	--	--	--	--	--	--
TRINITY_DN100894_c0_g1	0	0	0	0.396	0	1.124	--	--	--	--	--	--
TRINITY_DN100895_c0_g1	0	0	0	0.151	0	0.269	--	--	--	--	--	--
TRINITY_DN100898_c0_g1	0.149	0.231	0	0	0	0	--	--	SPAC22F3.13	gb|POF16311.1|	--	--
TRINITY_DN100898_c1_g1	0	0.271	0	0	0.29	0	--	--	--	--	--	--
TRINITY_DN100899_c0_g1	0	1.163	0	0	0	0	--	--	--	--	--	--
TRINITY_DN10089_c0_g1	0.09	0.14	0.107	0.198	0.083	0.269	--	--	--	--	--	--
TRINITY_DN1008_c0_g1	0	0	0	0.509	0.806	0	--	--	--	--	--	--
TRINITY_DN100900_c0_g1	0	0	0	0	0.496	0.365	GO:0005829,cytosol; GO:0005794,Golgi apparatus; GO:0005770,late endosome; GO:0031902,late endosome membrane; GO:0030904,retromer complex; GO:0030906,retromer, cargo-selective complex; GO:0008565,protein transporter activity; GO:0006886,intracellular protein transport; GO:0042147,retrograde transport, endosome to Golgi	K18468: VPS35; vacuolar protein sorting-associated protein 35	Hs14767017	gb|POF04284.1|	VP35B_ARATH, RecName: Full=Vacuolar protein sorting-associated protein 35B; AltName: Full=Vesicle protein sorting 35B;	A0A1D1XM24_9ARAE, SubName: Full=Vacuolar protein sorting-associated protein 35 {ECO:0000313|EMBL:JAT43433.1}; Flags: Fragment;
TRINITY_DN100902_c0_g1	0	0.201	0.107	0	0.145	0	--	--	--	gb|POE49355.1|	--	--
TRINITY_DN100902_c0_g2	0	0	0	0	0	0	--	--	--	--	--	--
TRINITY_DN100903_c1_g1	0	0.872	0	0	0	0	--	--	--	--	--	--
TRINITY_DN100904_c0_g1	0	0	0	0.151	0	0	--	--	--	--	--	--
TRINITY_DN100906_c0_g1	0.458	0	0	0	0	0	--	--	7290870	--	--	--
TRINITY_DN100906_c0_g2	0.279	0	0	0	0	0	--	--	--	--	--	--
TRINITY_DN100907_c0_g1	8.615	2.778	4.691	1.743	0.9	0.624	--	--	--	--	--	--
TRINITY_DN10090_c0_g1	0	0	0	0	0.083	0.183	--	--	--	--	--	--
TRINITY_DN100911_c0_g1	0	0	0.878	0	0.134	0.144	--	--	--	--	--	--
TRINITY_DN100912_c0_g1	0	0	0	0	0	0	--	--	--	--	--	--
TRINITY_DN100913_c0_g1	0	1.113	0	0	0	0	--	--	--	--	--	--
TRINITY_DN100913_c1_g1	0	0	0	0	0	0	--	--	--	ref|XP_015699008.1|	--	A0A0A8Z6Q8_ARUDO, SubName: Full=Uncharacterized protein {ECO:0000313|EMBL:JAD33368.1};
TRINITY_DN100914_c0_g1	0	0	2.324	2.007	0	0	--	--	--	--	--	--
TRINITY_DN100914_c1_g1	0	0.602	0	0	0	0	--	--	--	--	--	--
TRINITY_DN100916_c0_g1	0	0	0	0	0.651	0	--	--	--	--	--	--
TRINITY_DN100917_c0_g1	1.731	0	0	0	0	0	--	--	--	--	--	--
TRINITY_DN100917_c0_g2	0	0.221	0	0	0.238	0.279	--	--	--	--	--	--
TRINITY_DN100918_c0_g1	0	0	0	0.198	0.486	0.183	--	--	--	--	--	--
TRINITY_DN100919_c0_g1	0.239	0	0	0	0	0	--	--	--	--	--	--
TRINITY_DN100919_c0_g2	0	0.15	0	0.17	0.083	0.173	--	--	--	--	--	--
TRINITY_DN10091_c0_g1	0	0	0	0	0	0	--	--	--	--	--	--
TRINITY_DN100920_c0_g1	0	0	0	0	0	0	--	--	--	--	--	--
TRINITY_DN100922_c0_g1	0	0	0	0	0	0.548	--	--	--	--	--	--
TRINITY_DN100924_c0_g1	0	0.211	0.728	0.245	0.3	0	--	--	--	ref|XP_020146352.1|	--	M8BSI4_AEGTA, SubName: Full=Uncharacterized protein {ECO:0000313|EMBL:EMT09749.1, ECO:0000313|EnsemblPlants:EMT09749};
TRINITY_DN100925_c0_g1	0	0	0.857	0	0.165	0.365	--	--	--	--	--	--
TRINITY_DN100926_c0_g1	0.348	0	0	0	0	0	GO:0005737,cytoplasm; GO:0005856,cytoskeleton; GO:0031514,motile cilium	K14555: UTP13, TBL3; U3 small nucleolar RNA-associated protein 13	SPAC4D7.03	gb|POE74505.1|	DAW1_CHLRE, RecName: Full=Dynein assembly factor with WDR repeat domains 1; AltName: Full=Outer row dynein assembly protein 16;	A0A1D1Z581_9ARAE, SubName: Full=F-box/WD repeat-containing protein 7 {ECO:0000313|EMBL:JAT62026.1};
TRINITY_DN100927_c0_g1	0.109	0.281	0	0.132	0.103	0.115	--	--	--	gb|POE53333.1|	--	--
TRINITY_DN100928_c0_g1	0	0.08	0.236	0.066	0.052	0.115	--	--	--	gb|POE53385.1|	--	--
TRINITY_DN100929_c0_g1	0	0	0	0	0	0.355	--	--	--	gb|POE78472.1|	--	A0A1Y1ILR3_KLENI, SubName: Full=Uncharacterized protein {ECO:0000313|EMBL:GAQ90081.1};
TRINITY_DN100929_c1_g1	0	0	0	0	0	0	--	--	--	--	--	--
TRINITY_DN10092_c0_g1	0	0	0	0	0	1.018	--	--	--	--	--	--
TRINITY_DN100930_c0_g1	0	0	0	0	0	0	--	--	--	--	--	--
TRINITY_DN100930_c0_g2	0.448	0	0	0	0	0	GO:0016591,DNA-directed RNA polymerase II, holoenzyme; GO:0005634,nucleus; GO:0008420,CTD phosphatase activity; GO:0046872,metal ion binding; GO:0008022,protein C-terminus binding; GO:0003723,RNA binding; GO:0070940,dephosphorylation of RNA polymerase II C-terminal domain; GO:0009651,response to salt stress; GO:0006351,transcription, DNA-templated	K18999: CPL3_4; RNA polymerase II C-terminal domain phosphatase-like 3/4 [EC:3.1.3.16]	At5g58000_2	gb|PIA45815.1|	CPL4_ARATH, RecName: Full=RNA polymerase II C-terminal domain phosphatase-like 4; Short=FCP-like 4; EC=3.1.3.16; AltName: Full=Carboxyl-terminal phosphatase-like 4; Short=AtCPL4; Short=CTD phosphatase-like 4;	A0A1D1YIC0_9ARAE, SubName: Full=RNA polymerase II C-terminal domain phosphatase-like 4 {ECO:0000313|EMBL:JAT54385.1};
TRINITY_DN100931_c0_g1	0.676	0	0	0	0	0	--	--	--	--	--	--
TRINITY_DN100932_c0_g1	0.06	0.14	0.075	0.075	0.093	0.231	--	--	--	--	--	--
TRINITY_DN100933_c0_g1	1.224	0	0	0	0	0	--	--	--	--	--	--
TRINITY_DN100934_c0_g1	1.88	0	0	0	0	0	--	--	--	--	--	--
TRINITY_DN100935_c0_g1	0.448	0	0	0	0	0	--	--	--	--	--	--
TRINITY_DN100935_c0_g2	0	0	0	0	1.954	0	--	--	--	--	--	--
TRINITY_DN100937_c0_g1	0	0.471	0	0	0	0	--	--	--	--	--	--
TRINITY_DN100937_c0_g2	0	0.07	0.054	0.047	0.041	0.048	--	--	--	--	--	--
TRINITY_DN10093_c0_g1	0.617	0	0	0	0	0	--	--	--	--	--	--
TRINITY_DN100940_c0_g1	1.91	0	0	0	0	0	--	--	--	--	--	--
TRINITY_DN100942_c0_g1	0	0	0	2.073	0	2.027	--	--	--	--	--	--
TRINITY_DN100943_c0_g1	0	0	0	0	1.406	0	--	--	--	--	--	--
TRINITY_DN100944_c0_g1	0.099	0	0.246	0.17	0	0.048	--	--	--	--	--	--
TRINITY_DN100946_c0_g1	0.259	0	0	0.302	0.124	0	--	--	--	--	--	--
TRINITY_DN100947_c0_g1	0	0	0	0	0.662	0.259	--	--	--	gb|POE62427.1|	--	--
TRINITY_DN100948_c0_g1	0	0	2.42	0	0	0	--	--	--	--	--	--
TRINITY_DN100949_c0_g1	0	0.672	0	0	0	0	--	--	--	--	--	--
TRINITY_DN10094_c0_g1	0	0	0	0.32	0.269	0	--	--	--	--	--	--
TRINITY_DN100950_c0_g1	0	0	0	0	0	0	--	--	--	--	--	--
TRINITY_DN100951_c0_g1	0	0.321	0	0	0	0	--	--	--	--	--	--
TRINITY_DN100952_c0_g1	0	0	0	0	0	0	--	--	--	--	--	--
TRINITY_DN100955_c0_g1	0	0	0	0	0	0	--	--	--	--	--	--
TRINITY_DN100957_c0_g1	6.705	0	0	0	0	0	--	--	--	--	--	--
TRINITY_DN100957_c0_g2	0.298	0	0	0	0	0	GO:0009507,chloroplast; GO:0009941,chloroplast envelope; GO:0009536,plastid; GO:0009658,chloroplast organization	--	At4g39470	ref|XP_010925351.1|	SG1_ARATH, RecName: Full=protein SLOW GREEN 1, chloroplastic {ECO:0000303|PubMed:24420572}; Flags: Precursor;	A0A1U8AAQ2_NELNU, SubName: Full=protein SLOW GREEN 1, chloroplastic {ECO:0000313|RefSeq:XP_010263841.1};
TRINITY_DN100959_c0_g1	0.776	0	0	0	0	0	GO:0009507,chloroplast; GO:0005739,mitochondrion; GO:0008441,3'(2'),5'-bisphosphate nucleotidase activity; GO:0046872,metal ion binding; GO:0046854,phosphatidylinositol phosphorylation	K01082: cysQ, MET22, BPNT1; 3'(2'), 5'-bisphosphate nucleotidase [EC:3.1.3.7]	At4g05090	gb|OVA07983.1|	DPNPM_ARATH, RecName: Full=Putative PAP-specific phosphatase, mitochondrial; EC=3.1.3.7; AltName: Full=3'(2'),5'-bisphosphate nucleotidase; AltName: Full=3'(2'),5-bisphosphonucleoside 3'(2')-phosphohydrolase; AltName: Full=DPNPase; Flags: Precursor;	A0A200QBY1_9MAGN, SubName: Full=Inositol monophosphatase {ECO:0000313|EMBL:OVA07983.1};
TRINITY_DN10095_c0_g1	0.05	0.17	0	0	0.052	0.106	--	--	--	gb|POE75620.1|	--	--
TRINITY_DN100960_c0_g1	1.144	0	0	0	0.052	0	GO:0005840,ribosome; GO:0003735,structural constituent of ribosome; GO:0006412,translation	K02918: RP-L35e, RPL35; large subunit ribosomal protein L35e	Hs6005860	ref|XP_021660470.1|	RL35_EUPES, RecName: Full=60S ribosomal protein L35;	A0A1D1YAC0_9ARAE, SubName: Full=60S ribosomal protein L35 {ECO:0000313|EMBL:JAT51581.1}; Flags: Fragment;
TRINITY_DN100963_c0_g1	0	0	0.311	0	0	0	--	--	--	--	--	--
TRINITY_DN100965_c0_g1	0	0	0	0	0	0.922	--	--	--	--	--	--
TRINITY_DN100966_c0_g1	0	0	0	0.217	0.527	0.375	--	K22464: FAP; fatty acid photodecarboxylase [EC:4.1.1.106]	--	--	--	K3XC76_PYTUL, SubName: Full=Uncharacterized protein {ECO:0000313|EnsemblProtists:PYU1_T014825};
TRINITY_DN100968_c0_g1	0	0	0	0	1.003	0	--	--	--	--	--	--
TRINITY_DN100969_c0_g1	0.308	0.281	0	0	0.889	0	--	--	--	--	--	--
TRINITY_DN100969_c1_g1	0	0	0	0	2.533	0	--	--	--	--	--	--
TRINITY_DN10096_c0_g1	0.119	0.03	0.161	0.113	0.124	0	--	--	--	--	--	--
TRINITY_DN100970_c0_g1	0	0	0	0	2.864	0	--	--	--	--	--	--
TRINITY_DN100970_c1_g1	0	0	0	0	0	1.162	--	--	--	--	--	--
TRINITY_DN100973_c0_g1	2.596	0	0	0	0	0	--	--	--	--	--	--
TRINITY_DN100975_c0_g1	0.418	0.13	0	0	0.558	0.346	--	--	--	--	--	--
TRINITY_DN100976_c0_g1	0.667	0	0	0	0	0	--	--	--	--	--	--
TRINITY_DN100977_c0_g1	0	0	0	0	2.182	0	--	--	--	--	--	--
TRINITY_DN100978_c0_g1	0.477	0	0	0	0.9	0	--	--	--	--	--	--
TRINITY_DN100978_c1_g1	0	0	0	0.104	0.083	0.096	--	--	--	--	--	--
TRINITY_DN10097_c0_g1	0.06	0	0	0	0.227	0.173	--	--	--	--	--	--
TRINITY_DN100980_c0_g1	0	0	0	0	0	0	--	--	--	--	--	--
TRINITY_DN100981_c0_g1	0	0.03	0	0	0.083	0.163	GO:0005622,intracellular; GO:0000155,phosphorelay sensor kinase activity; GO:0009736,cytokinin-activated signaling pathway	K19691: NIK1, TCSC; osomolarity two-component system, sensor histidine kinase NIK1 [EC:2.7.13.3]	At5g10720	gb|POF17036.1|	OHK1_ORYSJ, RecName: Full=Probable histidine kinase 1 {ECO:0000305}; Short=OsHK1 {ECO:0000303|PubMed:16891544}; EC=2.7.13.3 {ECO:0000305};	A9RPX8_PHYPA, SubName: Full=Predicted protein {ECO:0000313|EMBL:EDQ78961.1}; Flags: Fragment;
TRINITY_DN100982_c0_g1	0.865	0	0	0	0	0	--	--	--	--	--	--
TRINITY_DN100983_c0_g1	0	1.173	0	0	0	0	--	--	--	--	--	--
TRINITY_DN100985_c0_g1	0.468	0	0	0	0	0	GO:0009507,chloroplast; GO:0009905,ent-copalyl diphosphate synthase activity; GO:0000287,magnesium ion binding; GO:0010333,terpene synthase activity; GO:0009686,gibberellin biosynthetic process; GO:0009685,gibberellin metabolic process	K04120: E5.5.1.13; ent-copalyl diphosphate synthase [EC:5.5.1.13]	--	ref|XP_018685591.1|	CPS1_ORYSJ, RecName: Full=Ent-copalyl diphosphate synthase 1, chloroplastic; Short=Ent-CDP synthase 1; Short=OsCPS1; Short=OsCPS1ent; EC=5.5.1.13; AltName: Full=Ent-kaurene synthase A; AltName: Full=OsCPS; Flags: Precursor;	M0TVA5_MUSAM, SubName: Full=Uncharacterized protein {ECO:0000313|EnsemblPlants:GSMUA_Achr8P31530_001};
TRINITY_DN100986_c0_g1	0.169	0.17	0	0	0.207	0	--	--	--	--	--	--
TRINITY_DN100987_c0_g1	0.07	0	0	0.057	0.083	0.211	--	--	--	gb|POE47398.1|	--	--
TRINITY_DN100989_c0_g1	1.82	0	0	0	0	0	--	--	--	--	--	--
TRINITY_DN10098_c0_g1	0.04	0.12	0	0	0.124	0.183	GO:0048046,apoplast; GO:0005507,copper ion binding; GO:0052716,hydroquinone:oxygen oxidoreductase activity; GO:0046274,lignin catabolic process	K00423: E1.10.3.3; L-ascorbate oxidase [EC:1.10.3.3]	YFL041w	gb|POE65674.1|	LAC13_ORYSJ, RecName: Full=Laccase-13; EC=1.10.3.2; AltName: Full=Benzenediol:oxygen oxidoreductase 13; AltName: Full=Diphenol oxidase 13; AltName: Full=Urishiol oxidase 13; Flags: Precursor;	F2E7I7_HORVV, SubName: Full=Predicted protein {ECO:0000313|EMBL:BAK03309.1};
TRINITY_DN100990_c0_g1	0	0.08	0.043	0.104	0.165	0	--	--	--	--	--	--
TRINITY_DN100991_c0_g1	0	0.16	0.139	0.075	0.341	0.442	GO:0016020,membrane; GO:0005886,plasma membrane; GO:0009506,plasmodesma; GO:0005773,vacuole; GO:0005509,calcium ion binding; GO:0070290,N-acylphosphatidylethanolamine-specific phospholipase D activity; GO:0004630,phospholipase D activity; GO:0016042,lipid catabolic process; GO:0046473,phosphatidic acid metabolic process; GO:0046470,phosphatidylcholine metabolic process; GO:0009789,positive regula…	K01115: PLD1_2; phospholipase D1/2 [EC:3.1.4.4]	At4g35790	ref|XP_021737109.1|	PLDD1_ARATH, RecName: Full=Phospholipase D delta {ECO:0000303|PubMed:11891260}; Short=AtPLDdelta {ECO:0000303|PubMed:11891260}; Short=PLD delta {ECO:0000303|PubMed:11891260}; EC=3.1.4.4 {ECO:0000269|PubMed:11706190, ECO:0000269|PubMed:12397060};	A0A0K9QQ71_SPIOL, RecName: Full=Phospholipase D {ECO:0000256|PIRNR:PIRNR036470}; EC=3.1.4.4 {ECO:0000256|PIRNR:PIRNR036470};
TRINITY_DN100993_c0_g1	0	0	0	0	0.972	0	--	--	--	--	--	--
TRINITY_DN100994_c0_g1	0	0	0	0.245	1.303	0	--	--	--	--	--	--
TRINITY_DN100996_c0_g1	0.08	0.14	0.632	0	0	0	--	--	--	--	--	--
TRINITY_DN100996_c1_g1	0	0	0	0	0	0	--	--	--	--	--	--
TRINITY_DN100997_c0_g1	0	0	0	0	0	0.298	--	--	--	--	--	--
TRINITY_DN100998_c0_g1	0.796	0	0	0	0	0	GO:0005634,nucleus; GO:0005524,ATP binding; GO:0004386,helicase activity; GO:0009553,embryo sac development; GO:0010183,pollen tube guidance; GO:0009875,pollen-pistil interaction	K10706: SETX, ALS4; senataxin [EC:3.6.4.-]	At4g30100	gb|AAP51895.2|	MAA3_ARATH, RecName: Full=Probable helicase MAGATAMA 3; EC=3.6.4.-; AltName: Full=SEN1-like protein;	A0A0A9GKL6_ARUDO, SubName: Full=Uncharacterized protein {ECO:0000313|EMBL:JAE21223.1};
TRINITY_DN10099_c0_g1	0	0.11	0.193	0.179	0	0.115	--	--	--	--	--	--
TRINITY_DN1009_c0_g1	0.05	0	0.257	0.009	0.072	0.038	--	--	--	--	--	--
TRINITY_DN100_c0_g1	0	0.321	0	0	0.124	0.038	--	--	--	--	--	--
TRINITY_DN101000_c0_g1	1.124	0	0	0	0	0	--	--	--	--	--	--
TRINITY_DN101001_c0_g1	0	0.371	0.386	0.217	0.01	0.711	--	--	--	--	--	--
TRINITY_DN101002_c0_g1	0.149	0.12	0	0	0.072	0.231	--	--	--	--	--	--
TRINITY_DN101002_c0_g2	0	0	0	0	0	0	--	--	--	--	--	--
TRINITY_DN101003_c0_g1	0.318	0	0	0	0	0	--	--	--	--	--	--
TRINITY_DN101003_c0_g2	2.049	0	0	0	0	0	--	--	--	--	--	--
TRINITY_DN101004_c0_g1	0	0.191	0.086	0	0.196	0	--	--	--	gb|POE84783.1|	--	--
TRINITY_DN101005_c0_g1	0	0	0.964	0	0	0	--	--	--	--	--	--
TRINITY_DN101006_c0_g1	0.438	0.391	0.289	0.094	0.424	0.077	GO:0005737,cytoplasm; GO:0016021,integral component of membrane; GO:0016757,transferase activity, transferring glycosyl groups; GO:0006004,fucose metabolic process; GO:0006486,protein glycosylation	K02941: RP-LP0, RPLP0; large subunit ribosomal protein LP0	At2g03280	dbj|BAJ93464.1|	OFUT3_ARATH, RecName: Full=O-fucosyltransferase 3 {ECO:0000305}; Short=O-FucT-3 {ECO:0000305}; EC=2.4.1.- {ECO:0000305}; AltName: Full=O-fucosyltransferase family protein {ECO:0000305};	A0A287P1U0_HORVV, SubName: Full=Uncharacterized protein {ECO:0000313|EnsemblPlants:HORVU4Hr1G051230.5};
TRINITY_DN101007_c0_g1	2.039	0	0	0	0	0	--	--	--	--	--	--
TRINITY_DN101008_c0_g1	0	0	1.028	0	0	0	--	--	--	--	--	--
TRINITY_DN101009_c0_g1	0	0.1	0.161	0	0.6	0	--	--	--	--	--	--
TRINITY_DN101009_c1_g1	0	0	0	0	0.072	0.154	--	--	--	--	--	--
TRINITY_DN10100_c0_g1	0	0	0	0	0.331	0	GO:0005737,cytoplasm; GO:0005856,cytoskeleton; GO:0031514,motile cilium	K14963: WDR5, SWD3, CPS30; COMPASS component SWD3	Hs16306494	gb|POE47008.1|	DAW1_CHLRE, RecName: Full=Dynein assembly factor with WDR repeat domains 1; AltName: Full=Outer row dynein assembly protein 16;	A0A1D1Z581_9ARAE, SubName: Full=F-box/WD repeat-containing protein 7 {ECO:0000313|EMBL:JAT62026.1};
TRINITY_DN101010_c0_g1	0.119	0	0	0	0.227	0	GO:0005634,nucleus; GO:0005524,ATP binding; GO:0046872,metal ion binding; GO:0000309,nicotinamide-nucleotide adenylyltransferase activity; GO:0004515,nicotinate-nucleotide adenylyltransferase activity; GO:0034628,'de novo' NAD biosynthetic process from aspartate	K06210: NMNAT; nicotinamide mononucleotide adenylyltransferase [EC:2.7.7.1 2.7.7.18]	YGR010w	gb|POE64956.1|	NMNAT_ARATH, RecName: Full=Nicotinamide/nicotinic acid mononucleotide adenylyltransferase {ECO:0000305}; Short=NMN/NaMN adenylyltransferase; EC=2.7.7.1; EC=2.7.7.18; AltName: Full=Nicotinamide mononucleotide adenylyltransferase; Short=NMN adenylyltransferase; AltName: Full=Nicotinate-nucleotide adenylyltransferase; Short=NaMN adenylyltransferase;	A0A1Q9EHT8_SYMMI, SubName: Full=Nicotinamide-nucleotide adenylyltransferase 1 {ECO:0000313|EMBL:OLQ07006.1};
TRINITY_DN101011_c0_g1	2.368	0	0	0	0	0	--	--	--	--	--	--
TRINITY_DN101013_c0_g1	0.537	0	0	0	0.103	0	GO:0004425,indole-3-glycerol-phosphate synthase activity; GO:0004640,phosphoribosylanthranilate isomerase activity; GO:0000162,tryptophan biosynthetic process	--	SPBC1539.09c_3	gb|POE80929.1|	TRPC_PHYPR, RecName: Full=Tryptophan biosynthesis protein TRP1; Includes: RecName: Full=Indole-3-glycerol phosphate synthase; Short=IGPS; EC=4.1.1.48; Includes: RecName: Full=N-(5'-phospho-ribosyl)anthranilate isomerase; Short=PRAI; EC=5.3.1.24;	A0A1E7FV90_9STRA, SubName: Full=Indole-3-glycerol-phosphate synthase {ECO:0000313|EMBL:OEU22044.1};
TRINITY_DN101014_c0_g1	1.88	0	0	0	0	0	--	--	--	--	--	--
TRINITY_DN101016_c1_g1	0.269	0	0	0	0	0	GO:0016021,integral component of membrane; GO:0005886,plasma membrane; GO:0015591,D-ribose transmembrane transporter activity; GO:0015148,D-xylose transmembrane transporter activity; GO:0005354,galactose transmembrane transporter activity; GO:0005355,glucose transmembrane transporter activity; GO:0015168,glycerol transmembrane transporter activity; GO:0015575,mannitol transmembrane transporter ac…	K08150: SLC2A13, ITR; MFS transporter, SP family, solute carrier family 2 (myo-inositol transporter), member 13	At3g18830	ref|XP_006856085.3|	PLT5_ARATH, RecName: Full=Polyol transporter 5; AltName: Full=Protein POLYOL TRANSPORTER 5; Short=AtPLT5; AltName: Full=Sugar-proton symporter PLT5;	U5D825_AMBTC, SubName: Full=Uncharacterized protein {ECO:0000313|EMBL:ERN17552.1};
TRINITY_DN101017_c0_g1	0.08	0	0	0	0	0	--	--	SPBC18H10.04c	gb|POF14068.1|	--	--
TRINITY_DN101019_c0_g1	0.905	0	0	0	0	0	--	--	--	--	--	--
TRINITY_DN101020_c0_g1	0.298	0	0	0	0.021	0	GO:0004021,L-alanine:2-oxoglutarate aminotransferase activity; GO:0030170,pyridoxal phosphate binding; GO:0009058,biosynthetic process; GO:0042853,L-alanine catabolic process	K00814: GPT, ALT; alanine transaminase [EC:2.6.1.2]	CE08545	ref|NP_001333149.1|	ALA2_PANMI, RecName: Full=Alanine aminotransferase 2; Short=ALAAT-2; EC=2.6.1.2; AltName: Full=Glutamate pyruvate transaminase 2; Short=GPT; AltName: Full=Glutamic--alanine transaminase 2; AltName: Full=Glutamic--pyruvic transaminase 2;	A0A097ITY6_9FLOR, SubName: Full=Alanine transaminase {ECO:0000313|EMBL:AIT69941.1};
TRINITY_DN101021_c0_g1	0	0	0	0	0	0	--	--	--	--	--	--
TRINITY_DN101024_c0_g1	0.448	0.13	0	0	0	0	--	--	--	--	--	--
TRINITY_DN101025_c0_g1	0	0	0.118	0	0	0.077	--	--	--	--	--	--
TRINITY_DN101026_c0_g1	0	0	0	0	0	1.191	--	--	--	--	--	--
TRINITY_DN101027_c0_g1	0	0	0	0.236	0	0	GO:0005739,mitochondrion	K13428: EFR; LRR receptor-like serine/threonine-protein kinase EFR [EC:2.7.11.1]	At1g44510	ref|XP_015645984.1|	M810_ARATH, RecName: Full=Uncharacterized mitochondrial protein AtMg00810; AltName: Full=ORF240b;	Q2QSG8_ORYSJ, SubName: Full=Retrotransposon protein, putative, Ty1-copia subclass {ECO:0000313|EMBL:ABA97652.1};
TRINITY_DN101028_c0_g1	0	0	0	0.349	0	0	GO:0005634,nucleus; GO:0005524,ATP binding; GO:0004386,helicase activity; GO:0009553,embryo sac development; GO:0010183,pollen tube guidance; GO:0009875,pollen-pistil interaction	K10706: SETX, ALS4; senataxin [EC:3.6.4.-]	At1g65810	gb|EEE61560.1|	MAA3_ARATH, RecName: Full=Probable helicase MAGATAMA 3; EC=3.6.4.-; AltName: Full=SEN1-like protein;	B9FC55_ORYSJ, SubName: Full=Uncharacterized protein {ECO:0000313|EMBL:EEE61560.1};
TRINITY_DN101029_c0_g1	0.597	0	0	0	0	0	--	--	--	--	--	--
TRINITY_DN101030_c0_g1	0	0	0.246	0	0.093	0	--	--	--	--	--	--
TRINITY_DN101030_c0_g2	0.189	0.05	0	0	0	0.067	--	--	--	--	--	--
TRINITY_DN101031_c0_g1	0	0.501	1.703	0	0	0.519	GO:0016021,integral component of membrane	--	--	gb|PAN22317.1|	U496B_ORYSI, RecName: Full=Putative UPF0496 protein 2;	A0A1E5WIT8_9POAL, SubName: Full=Putative UPF0496 protein 2 {ECO:0000313|EMBL:OEL37293.1};
TRINITY_DN101032_c0_g1	0	0	0	0	0	0	--	--	--	--	--	--
TRINITY_DN101033_c0_g1	0	1.544	0	0	0.052	0	--	--	--	--	--	--
TRINITY_DN101034_c0_g1	0	0	0	0.396	0	0.375	--	--	--	--	--	--
TRINITY_DN101036_c0_g1	0	1.444	0.107	0.094	0.124	0	--	--	--	--	--	--
TRINITY_DN101037_c0_g1	0	0	0	0	0	0	--	--	--	--	--	--
TRINITY_DN101038_c0_g1	0.786	0	0	0	0	0	--	--	--	--	--	--
TRINITY_DN101039_c0_g1	0.587	0	0	0	0	0	--	--	--	--	--	--
TRINITY_DN101040_c0_g1	0.398	0	0	0	0	0	--	--	--	--	--	--
TRINITY_DN101041_c0_g1	0.517	0	0	0	0	0	GO:0005789,endoplasmic reticulum membrane; GO:0016021,integral component of membrane; GO:0016758,transferase activity, transferring hexosyl groups; GO:0006506,GPI anchor biosynthetic process	K05284: PIGM; phosphatidylinositol glycan, class M [EC:2.4.1.-]	Hs21553315	ref|XP_009399256.1|	PIGM_ARATH, RecName: Full=GPI mannosyltransferase 1; EC=2.4.1.-; AltName: Full=GPI mannosyltransferase I; Short=GPI-MT-I; AltName: Full=Phosphatidylinositol-glycan biosynthesis class M protein; Short=PIG-M; AltName: Full=Protein PEANUT 1;	M0SUF7_MUSAM, SubName: Full=Uncharacterized protein {ECO:0000313|EnsemblPlants:GSMUA_Achr5P00280_001};
TRINITY_DN101044_c0_g1	0.667	0	0	0	0	0	--	--	--	--	--	--
TRINITY_DN101046_c0_g1	0.647	0	0	0	0	0	--	--	--	--	--	--
TRINITY_DN101047_c0_g1	0.438	0	0	0	0.217	0	--	--	--	--	--	--
TRINITY_DN101048_c0_g1	0	0	0	0	0	0.259	GO:0005829,cytosol; GO:0022625,cytosolic large ribosomal subunit; GO:0022626,cytosolic ribosome; GO:0005730,nucleolus; GO:0042788,polysomal ribosome; GO:0003735,structural constituent of ribosome; GO:0006412,translation	K02912: RP-L32e, RPL32; large subunit ribosomal protein L32e	SPAC3H5.10	gb|POF13740.1|	RL321_ARATH, RecName: Full=60S ribosomal protein L32-1;	A0A1D1Y795_9ARAE, SubName: Full=60S ribosomal protein L32 {ECO:0000313|EMBL:JAT50514.1}; Flags: Fragment;
TRINITY_DN101049_c0_g1	0.716	0.842	1.746	0.292	0.476	0.24	--	--	--	--	--	--
TRINITY_DN10104_c0_g1	0	0	0	0	0	0	--	--	--	--	--	--
TRINITY_DN101050_c0_g1	0	0.13	0.739	0	0	0	GO:0005829,cytosol; GO:0042555,MCM complex; GO:0000347,THO complex; GO:0005524,ATP binding; GO:0003677,DNA binding; GO:0003678,DNA helicase activity; GO:0046872,metal ion binding; GO:0007049,cell cycle; GO:0006270,DNA replication initiation; GO:0006268,DNA unwinding involved in DNA replication	K02212: MCM4, CDC54; DNA replication licensing factor MCM4 [EC:3.6.4.12]	Hs14738665	ref|XP_009351178.1|	MCM4_ARATH, RecName: Full=DNA replication licensing factor MCM4; EC=3.6.4.12; AltName: Full=Minichromosome maintenance protein 4; Short=AtMCM4;	D7FQ67_ECTSI, RecName: Full=DNA helicase {ECO:0000256|SAAS:SAAS00536514}; EC=3.6.4.12 {ECO:0000256|SAAS:SAAS00536514};
TRINITY_DN101051_c0_g1	0.776	0	0	0	0	0	--	--	--	--	--	--
TRINITY_DN101052_c0_g1	1.572	0	0	0	0	0	--	--	--	--	--	--
TRINITY_DN101052_c0_g2	0.418	0	0.118	0	0	0	--	--	--	--	--	--
TRINITY_DN101053_c0_g1	0	0.732	0	0	0	0	--	--	--	--	--	--
TRINITY_DN101054_c0_g1	0	0.09	0	0.179	0.093	0.144	GO:0005886,plasma membrane; GO:0005524,ATP binding; GO:0016787,hydrolase activity; GO:0007049,cell cycle	K22530: ATAD1; ATPase family AAA domain-containing protein 1 [EC:3.6.1.-]	YGR028w	gb|POE88024.1|	CDC48_SOYBN, RecName: Full=Cell division cycle protein 48 homolog; AltName: Full=Valosin-containing protein homolog; Short=VCP;	A0A1D1XX30_9ARAE, SubName: Full=Putative AAA domain-containing protein C24B10.10c {ECO:0000313|EMBL:JAT46940.1}; Flags: Fragment;
TRINITY_DN101054_c1_g1	0.647	0	0	0	0	0	--	--	--	--	--	--
TRINITY_DN101055_c0_g1	0.04	0.01	0.011	0.057	0.155	0.269	GO:0009507,chloroplast; GO:0005524,ATP binding; GO:0016301,kinase activity; GO:0000287,magnesium ion binding; GO:0004749,ribose phosphate diphosphokinase activity; GO:0009116,nucleoside metabolic process; GO:0009165,nucleotide biosynthetic process; GO:0009156,ribonucleoside monophosphate biosynthetic process	K00948: PRPS, prsA; ribose-phosphate pyrophosphokinase [EC:2.7.6.1]	SPCC1620.06c	gb|POE99420.1|	KPRS1_ARATH, RecName: Full=Ribose-phosphate pyrophosphokinase 1, chloroplastic; EC=2.7.6.1; AltName: Full=PRS I; AltName: Full=Phosphoribosyl pyrophosphate synthase 1; Flags: Precursor;	A0A1Q9DK30_SYMMI, SubName: Full=Ribose-phosphate pyrophosphokinase {ECO:0000313|EMBL:OLP95526.1};
TRINITY_DN101056_c0_g1	0	0.331	0	0	0	0	--	--	--	--	--	--
TRINITY_DN101057_c0_g1	0.109	0	0.075	0	0.114	0.106	--	--	--	gb|POE63423.1|	--	--
TRINITY_DN101058_c0_g1	0.139	0.09	0	0.047	0.227	0	--	--	--	gb|ACG26880.1|	--	H3GA79_PHYRM, SubName: Full=Cell 12A endoglucanase {ECO:0000313|EnsemblProtists:Phyra72030};
TRINITY_DN10105_c0_g1	0.358	0	0.054	0	0	0	--	--	--	--	--	--
TRINITY_DN101061_c0_g1	0	0	0	0	0	0	--	--	--	--	--	--
TRINITY_DN101062_c0_g1	0.885	0	0	0	0	0	--	--	--	--	--	--
TRINITY_DN101064_c0_g1	0	0.241	0	0	0.269	0.144	--	--	--	--	--	--
TRINITY_DN101064_c0_g2	0.408	0.12	0	0.32	0	0	--	--	--	--	--	--
TRINITY_DN101065_c0_g1	2.258	0	0	0	0	0	--	--	--	--	--	--
TRINITY_DN101067_c0_g1	0.298	0.271	0.396	0.358	0	0	--	--	--	--	--	--
TRINITY_DN101068_c0_g1	0	0.652	0	0	0	0	--	--	--	--	--	--
TRINITY_DN101069_c0_g1	0	0	0.728	0.226	0	0	--	--	At2g05390	gb|KQL03643.1|	--	K3XSH9_SETIT, SubName: Full=Uncharacterized protein {ECO:0000313|EMBL:KQL03643.1, ECO:0000313|EnsemblPlants:Si004878m};
TRINITY_DN101069_c0_g2	0	0	0	0.179	0.103	0	--	K07151: STT3; dolichyl-diphosphooligosaccharide---protein glycosyltransferase [EC:2.4.99.18]	At3g25450	gb|KQL03643.1|	--	K3XSH9_SETIT, SubName: Full=Uncharacterized protein {ECO:0000313|EMBL:KQL03643.1, ECO:0000313|EnsemblPlants:Si004878m};
TRINITY_DN101071_c0_g1	0.905	0	0	0	0	0	--	--	--	--	--	--
TRINITY_DN101072_c0_g1	0.756	0	0	0	0	0	--	--	--	--	--	--
TRINITY_DN101073_c0_g1	0.657	0	0	0	0	0	--	--	--	--	--	--
TRINITY_DN101074_c0_g1	0	0	0	0	0.383	1.23	--	--	--	--	--	--
TRINITY_DN101076_c0_g1	0	0.542	0	0	0	0	--	--	--	--	--	U5D554_AMBTC, SubName: Full=Uncharacterized protein {ECO:0000313|EMBL:ERN17554.1};
TRINITY_DN101077_c0_g1	0	0	0	0	0	0	--	--	--	--	--	--
TRINITY_DN101078_c0_g1	0	0	0	0	0	0	--	--	--	--	--	--
TRINITY_DN10107_c0_g1	0.667	0.201	0	0	0	0	--	--	--	--	--	--
TRINITY_DN101080_c0_g1	0	0	0	0	0	0.893	--	--	--	--	--	--
TRINITY_DN101081_c0_g1	0	0.521	0	0.066	0	0	GO:0005794,Golgi apparatus; GO:0000139,Golgi membrane; GO:0016021,integral component of membrane; GO:0016760,cellulose synthase (UDP-forming) activity; GO:0051753,mannan synthase activity; GO:0071555,cell wall organization; GO:0030244,cellulose biosynthetic process; GO:0071669,plant-type cell wall organization or biogenesis	K20923: CSLF; mixed-linked glucan synthase [EC:2.4.1.-]	At5g16910	ref|XP_010237194.1|	CSLF1_ORYSJ, RecName: Full=Putative mixed-linked glucan synthase 1; EC=2.4.1.-; AltName: Full=1,3/1,4-beta D-glucan synthase 1; AltName: Full=Cellulose synthase-like protein F1; AltName: Full=OsCslF1;	A0A287HTN3_HORVV, SubName: Full=Uncharacterized protein {ECO:0000313|EnsemblPlants:HORVU2Hr1G042300.6};
TRINITY_DN101082_c0_g1	0.09	0.09	0	0.094	0.186	0	--	--	YIL033c	gb|POE56229.1|	--	--
TRINITY_DN101083_c0_g1	0.288	0	0	0	0	0	GO:0009535,chloroplast thylakoid membrane; GO:0016021,integral component of membrane; GO:0015031,protein transport	K10956: SEC61A; protein transport protein SEC61 subunit alpha	At2g18710	gb|KQL01154.1|	SECY_ORYSJ, RecName: Full=Preprotein translocase subunit SECY, chloroplastic; AltName: Full=CpSecY; Flags: Precursor;	K3YMY1_SETIT, SubName: Full=Uncharacterized protein {ECO:0000313|EMBL:KQL01154.1, ECO:0000313|EnsemblPlants:Si015615m};
TRINITY_DN101084_c0_g1	0	0	0	0	0	0	--	--	--	--	--	--
TRINITY_DN101085_c0_g1	1.323	1.223	0	1.583	2.482	0.759	--	--	--	--	--	--
TRINITY_DN101086_c0_g1	0	0	0	0	0	0.711	--	--	--	--	--	--
TRINITY_DN101088_c0_g1	0.05	0.04	0	0.113	0.093	0.058	--	--	--	--	--	--
TRINITY_DN101089_c0_g1	0	0	0	0	0	0	--	--	--	--	--	--
TRINITY_DN101089_c0_g2	0	0	0	0	0	0	--	--	--	--	--	--
TRINITY_DN10108_c0_g1	0	0	0.6	0	0	0	--	--	--	--	--	--
TRINITY_DN101090_c0_g1	0.149	0.441	0	0	0	0	--	--	--	--	--	--
TRINITY_DN101090_c0_g2	0	0.321	0	0	0	0	--	--	--	--	--	--
TRINITY_DN101091_c0_g1	0	0.05	0	0.075	0.041	0	GO:0005737,cytoplasm; GO:0005730,nucleolus; GO:0005634,nucleus; GO:0005200,structural constituent of cytoskeleton; GO:0006325,chromatin organization; GO:0016569,covalent chromatin modification; GO:0048574,long-day photoperiodism, flowering; GO:0048235,pollen sperm cell differentiation	K11340: ACTL6A, INO80K; actin-like protein 6A	Hs7705294	gb|POE64867.1|	ARP4_ARATH, RecName: Full=Actin-related protein 4 {ECO:0000303|PubMed:11891255};	A0A2G3APX8_CAPCH, SubName: Full=Actin-like protein 6B {ECO:0000313|EMBL:PHT96286.1};
TRINITY_DN101091_c0_g2	0.517	0	0	0	0	0	--	--	--	--	--	--
TRINITY_DN101092_c0_g1	0.836	0	0	0	0	0	--	--	--	--	--	--
TRINITY_DN101093_c0_g1	0	0	0	0	0	0.576	--	--	--	--	--	--
TRINITY_DN101093_c0_g2	0	0	0	0	0.476	0	--	--	--	--	--	--
TRINITY_DN101094_c0_g1	0.686	0	0.021	0.32	0.372	0.336	--	--	--	--	--	--
TRINITY_DN101096_c0_g1	0	0.191	0	0	0.114	0.038	--	--	--	--	--	--
TRINITY_DN101097_c0_g1	0	0.06	0	0	0.134	0.067	--	--	--	--	--	--
TRINITY_DN101099_c0_g1	0.358	0.15	0	0	0.517	0	--	--	--	--	--	--
TRINITY_DN10109_c0_g1	0.368	0	0	0	0	0	--	--	--	--	--	--
TRINITY_DN1010_c0_g1	0	1.494	0	0	0	0	--	--	--	--	--	--
TRINITY_DN101100_c0_g1	0.338	0.1	0.289	0.132	0.217	0.298	--	--	--	--	--	--
TRINITY_DN101101_c0_g1	0	0.782	0	0	0	0	--	--	--	--	--	--
TRINITY_DN101102_c0_g1	2.457	0.702	0.418	0.509	0.331	0.73	--	--	--	--	--	--
TRINITY_DN101103_c0_g1	0.03	0.15	0.043	0.132	0.145	0.173	--	--	--	--	--	--
TRINITY_DN101104_c0_g1	0.477	0	0	0	0	0	GO:0005759,mitochondrial matrix; GO:0005739,mitochondrion; GO:0005507,copper ion binding; GO:0004069,L-aspartate:2-oxoglutarate aminotransferase activity; GO:0080130,L-phenylalanine:2-oxoglutarate aminotransferase activity; GO:0030170,pyridoxal phosphate binding; GO:0006103,2-oxoglutarate metabolic process; GO:0006531,aspartate metabolic process; GO:0009058,biosynthetic process; GO:0006536,glutam…	K14455: GOT2; aspartate aminotransferase, mitochondrial [EC:2.6.1.1]	At2g30970	gb|EEC80783.1|	AAT1_ARATH, RecName: Full=Aspartate aminotransferase, mitochondrial; EC=2.6.1.1; AltName: Full=Transaminase A; Flags: Precursor;	A0A0E0LCF8_ORYPU, RecName: Full=Aspartate aminotransferase {ECO:0000256|RuleBase:RU000480}; EC=2.6.1.1 {ECO:0000256|RuleBase:RU000480};
TRINITY_DN101105_c1_g1	0	0	0	0	0	0	--	--	--	--	--	--
TRINITY_DN101106_c0_g1	1.681	0	0	0	0	0	--	--	--	--	--	--
TRINITY_DN101107_c0_g1	0.418	0	0	0	0	0	--	--	--	--	--	--
TRINITY_DN101107_c1_g1	1.711	0	0	0	0	0	--	--	--	--	--	--
TRINITY_DN101108_c0_g1	0	0	0	0.273	0	0	--	--	--	--	--	--
TRINITY_DN101108_c0_g2	0	0	0	0.386	0.31	0.74	--	--	--	--	--	--
TRINITY_DN101109_c0_g1	0.328	0.301	0.246	0.188	0.114	0.058	GO:0005768,endosome; GO:0005794,Golgi apparatus; GO:0000139,Golgi membrane; GO:0016021,integral component of membrane; GO:0005802,trans-Golgi network; GO:0008168,methyltransferase activity; GO:0045492,xylan biosynthetic process	K18801: GXM; glucuronoxylan 4-O-methyltransferase [EC:2.1.1.112]	At1g27930	ref|XP_020164755.1|	MT127_ARATH, RecName: Full=Probable methyltransferase At1g27930; EC=2.1.1.- {ECO:0000305};	A0A0E0MFJ4_ORYPU, SubName: Full=Uncharacterized protein {ECO:0000313|EnsemblPlants:OPUNC11G11700.1};
TRINITY_DN10110_c0_g1	0	0	0	0.716	0	0	--	--	--	--	--	--
TRINITY_DN101110_c0_g1	0	0	0	0.057	0.227	0.269	--	K01756: purB, ADSL; adenylosuccinate lyase [EC:4.3.2.2]	YLR359w	dbj|BAJ98299.1|	--	F2DT78_HORVV, RecName: Full=Adenylosuccinate lyase {ECO:0000256|RuleBase:RU361172}; Short=ASL {ECO:0000256|RuleBase:RU361172}; EC=4.3.2.2 {ECO:0000256|RuleBase:RU361172}; AltName: Full=Adenylosuccinase {ECO:0000256|RuleBase:RU361172};
TRINITY_DN101111_c0_g1	0	0	0	0	0	0.163	GO:0005768,endosome; GO:0005794,Golgi apparatus; GO:0000139,Golgi membrane; GO:0016021,integral component of membrane; GO:0005802,trans-Golgi network; GO:0008168,methyltransferase activity; GO:0045492,xylan biosynthetic process	K18801: GXM; glucuronoxylan 4-O-methyltransferase [EC:2.1.1.112]	At1g27930	ref|XP_020164755.1|	MT127_ARATH, RecName: Full=Probable methyltransferase At1g27930; EC=2.1.1.- {ECO:0000305};	A0A0E0MFJ4_ORYPU, SubName: Full=Uncharacterized protein {ECO:0000313|EnsemblPlants:OPUNC11G11700.1};
TRINITY_DN101112_c0_g1	0.09	0.15	0	0.217	0.269	0	--	--	--	--	--	--
TRINITY_DN101113_c0_g1	0.865	0	0	0	0	0	GO:0009507,chloroplast; GO:0004851,uroporphyrin-III C-methyltransferase activity; GO:0009236,cobalamin biosynthetic process; GO:0055114,oxidation-reduction process; GO:0019354,siroheme biosynthetic process	K02303: cobA; uroporphyrin-III C-methyltransferase [EC:2.1.1.107]	At5g40850	ref|XP_020099343.1|	SUMT_CYACA, RecName: Full=Uroporphyrinogen-III C-methyltransferase; Short=Urogen III methylase; EC=2.1.1.107; AltName: Full=SUMT; AltName: Full=Uroporphyrinogen III methylase; Short=UROM;	A0A199VZT5_ANACO, SubName: Full=Siroheme synthase 2 {ECO:0000313|EMBL:OAY82180.1};
TRINITY_DN101114_c0_g1	1.114	0	0.171	0.151	1.044	0.451	--	--	--	--	--	--
TRINITY_DN101116_c0_g1	2.984	0	0	0	0	0	--	--	--	--	--	--
TRINITY_DN101117_c0_g1	0	1.073	0	0	0	0	--	--	--	--	--	--
TRINITY_DN101118_c0_g1	0	0	0	4.015	0	0	--	--	--	--	--	--
TRINITY_DN101118_c1_g1	0	0.732	0	0	0.093	0.365	GO:0005739,mitochondrion; GO:0033926,glycopeptide alpha-N-acetylgalactosaminidase activity; GO:0004575,sucrose alpha-glucosidase activity; GO:0005987,sucrose catabolic process	--	At3g06500	gb|KDO72048.1|	NIN1_ORYSJ, RecName: Full=Neutral/alkaline invertase 1, mitochondrial {ECO:0000305}; Short=OsNIN1 {ECO:0000303|PubMed:17086397}; EC=3.2.1.26 {ECO:0000269|PubMed:17086397}; Flags: Precursor;	A0A067FXG6_CITSI, SubName: Full=Uncharacterized protein {ECO:0000313|EMBL:KDO72048.1}; Flags: Fragment;
TRINITY_DN101119_c0_g1	4.287	0	0	0	0	0	--	--	--	--	--	--
TRINITY_DN101120_c0_g1	0.199	0	0.118	0.358	0.041	0	--	--	--	--	--	--
TRINITY_DN101121_c0_g1	0.328	0	0	0	0	0	--	--	--	--	--	--
TRINITY_DN101122_c0_g1	0.129	0.07	0	0	3.174	0.067	GO:0009507,chloroplast; GO:0009570,chloroplast stroma; GO:0009534,chloroplast thylakoid; GO:0009535,chloroplast thylakoid membrane; GO:0016021,integral component of membrane; GO:0042651,thylakoid membrane; GO:0016787,hydrolase activity; GO:0046872,metal ion binding; GO:0045454,cell redox homeostasis; GO:0008152,metabolic process; GO:0010196,nonphotochemical quenching	K20884: FHY; riboflavin kinase / FMN hydrolase [EC:2.7.1.26 3.1.3.102]	At1g56500_1	gb|POE74669.1|	SOQ1_ARATH, RecName: Full=Protein SUPPRESSOR OF QUENCHING 1, chloroplastic {ECO:0000303|PubMed:23818601}; EC=3.1.3.- {ECO:0000250|UniProtKB:P95649}; Flags: Precursor;	D7G792_ECTSI, SubName: Full=Haloacid dehalogenase-like hydrolase {ECO:0000313|EMBL:CBJ27643.1};
TRINITY_DN101123_c0_g1	0.468	0	0	0	0	0	GO:0031225,anchored component of membrane; GO:0005886,plasma membrane; GO:0008289,lipid binding; GO:0006869,lipid transport	--	At1g55260	gb|PON90948.1|	YLS3_ARATH, RecName: Full=Protein YLS3; AltName: Full=Protein YELLOW-LEAF-SPECIFIC GENE 3; AltName: Full=Xylogen-like protein 9; Short=AtXYLP9; Flags: Precursor;	W5F7C4_WHEAT, SubName: Full=Uncharacterized protein {ECO:0000313|EnsemblPlants:TRIAE_CS42_5BL_TGACv1_404688_AA1308440.1};
TRINITY_DN101124_c1_g1	0.358	0	0	0	0	0	--	--	--	--	--	--
TRINITY_DN101125_c0_g1	0	0	0	0.415	0	0.173	--	--	--	--	--	--
TRINITY_DN101126_c0_g1	0	0	0	0	1.303	0	--	--	--	--	--	--
TRINITY_DN101127_c0_g1	0	0	0	0.603	0	0.509	--	--	--	--	--	--
TRINITY_DN101127_c1_g1	0.239	0.04	0	0	0.134	0.029	GO:0005634,nucleus; GO:0007049,cell cycle; GO:0051301,cell division	K21777: CCNB; G2/mitotic-specific cyclin-B, other	SPBC19F5.01c	gb|POE80167.1|	CCB14_ARATH, RecName: Full=Cyclin-B1-4; AltName: Full=G2/mitotic-specific cyclin-B1-4; Short=CycB1;4;	C1FHY6_MICCC, SubName: Full=Uncharacterized protein {ECO:0000313|EMBL:ACO69899.1};
TRINITY_DN101128_c0_g1	0.239	0	0	0	0	0	--	--	--	--	--	--
TRINITY_DN10112_c0_g1	0	0.16	0	0.075	0.196	0	--	--	--	--	--	--
TRINITY_DN101130_c0_g1	0.09	0.251	0.171	0	0	0.048	--	--	--	--	--	--
TRINITY_DN101131_c0_g1	0.08	0.401	0.214	0.057	0.072	0.144	GO:0004842,ubiquitin-protein transferase activity; GO:0010200,response to chitin	K08332: VAC8; vacuolar protein 8	At3g19380	gb|EMS66308.1|	PUB25_ARATH, RecName: Full=U-box domain-containing protein 25; EC=2.3.2.27; AltName: Full=Plant U-box protein 25; AltName: Full=RING-type E3 ubiquitin transferase PUB25 {ECO:0000305};	A0A0D9VGV8_9ORYZ, SubName: Full=Uncharacterized protein {ECO:0000313|EnsemblPlants:LPERR02G15960.1};
TRINITY_DN101134_c0_g1	0	0	0	0	0.496	0	--	--	--	--	--	--
TRINITY_DN101135_c0_g1	0.279	0	0	0	0	0.298	--	--	--	--	--	--
TRINITY_DN101136_c0_g1	0.507	0	0	0.198	0.165	0	--	--	--	--	--	--
TRINITY_DN101136_c0_g2	0.905	0	0	0	0	0	--	--	--	--	--	--
TRINITY_DN101138_c0_g1	0	0	0	0.066	0.114	0.058	--	--	--	--	--	--
TRINITY_DN101139_c0_g1	0	2.647	0	0	0	3.449	--	--	--	--	--	--
TRINITY_DN10113_c0_g1	0.099	0.07	0	0.123	0	0.163	--	--	--	--	--	--
TRINITY_DN101140_c0_g1	0	0	0.257	0	0	0.221	--	--	--	--	--	--
TRINITY_DN101141_c0_g1	0.487	0.431	0	0	0	0	--	--	--	--	--	--
TRINITY_DN101142_c0_g1	0.139	0	0	0	0.072	0	--	--	--	--	--	--
TRINITY_DN101143_c0_g1	0.169	0.451	0.225	0	0.165	0	--	--	--	--	--	--
TRINITY_DN101143_c0_g2	0	0	0	0	1.603	0	--	--	--	--	--	--
TRINITY_DN101144_c0_g1	0.03	0.04	0.054	0.085	0.093	0.125	GO:0031969,chloroplast membrane; GO:0016021,integral component of membrane; GO:0015121,phosphoenolpyruvate:phosphate antiporter activity; GO:0071917,triose-phosphate transmembrane transporter activity; GO:0008643,carbohydrate transport; GO:0015714,phosphoenolpyruvate transport; GO:0035436,triose phosphate transmembrane transport	K15283: SLC35E1; solute carrier family 35, member E1	SPBC83.11	gb|POE53315.1|	PPT3_ORYSJ, RecName: Full=Phosphoenolpyruvate/phosphate translocator 3, chloroplastic; Short=OsPPT3; Flags: Precursor;	A0A1D1XH18_9ARAE, SubName: Full=Putative transporter C83.11 {ECO:0000313|EMBL:JAT41683.1};
TRINITY_DN101145_c0_g1	0	0.521	0	0	0	0	--	--	--	--	--	--
TRINITY_DN101145_c1_g1	0.468	0.461	0.792	0	0.258	0.317	--	--	--	--	--	--
TRINITY_DN101146_c0_g1	0	0.983	0	0	0	0	--	--	--	--	--	--
TRINITY_DN101147_c0_g1	0	0	0	0.236	0	0	--	--	--	--	--	--
TRINITY_DN101147_c1_g1	0	0.221	0.086	0.424	0.331	0.144	--	--	--	--	--	--
TRINITY_DN101148_c0_g1	0.378	0	0	0	0	0	--	--	At5g42900	ref|XP_009390899.1|	--	A0A199UPK2_ANACO, SubName: Full=Uncharacterized protein {ECO:0000313|EMBL:OAY66679.1};
TRINITY_DN101149_c0_g1	0	0.291	0	0	0	0.365	--	--	--	--	--	--
TRINITY_DN101150_c0_g1	0.547	0	0	0	0	0	--	K13105: PRCC; proline-rich protein PRCC	At2g19270	gb|ONK70589.1|	--	M0SIF1_MUSAM, SubName: Full=Uncharacterized protein {ECO:0000313|EnsemblPlants:GSMUA_Achr3P27850_001};
TRINITY_DN101151_c0_g1	0	0.261	0	0	0.29	0	--	--	--	--	--	--
TRINITY_DN101152_c0_g1	0	0	0	0.726	0	0	--	--	--	--	--	--
TRINITY_DN101154_c0_g1	1.681	0	0	0	0	0	--	--	--	--	--	--
TRINITY_DN101155_c0_g1	0.746	0	0	0	0	0	--	--	--	--	--	--
TRINITY_DN101155_c1_g1	0.716	0	0	0	0	0	--	--	--	--	--	--
TRINITY_DN101156_c0_g1	0.945	0	0	0	0	0	--	--	--	--	--	--
TRINITY_DN101159_c0_g1	0	1.765	0	0	0	0	--	--	--	--	--	--
TRINITY_DN10115_c0_g1	0.885	0	0	0	0	0	--	--	--	--	--	--
TRINITY_DN101160_c0_g1	0	0.17	0	0	0.134	0	--	--	--	gb|POE72311.1|	--	--
TRINITY_DN101161_c0_g1	0	0	0	0	0.951	0	--	--	YLL057c	gb|POE96437.1|	--	H3H852_PHYRM, SubName: Full=Uncharacterized protein {ECO:0000313|EnsemblProtists:Phyra86955};
TRINITY_DN101162_c0_g1	0.816	0	0	0	0	0	--	K20899: GBP1_3_4_7; guanylate-binding protein 1/3/4/7	At5g46070	ref|XP_004961227.1|	--	A0A0A9QR50_ARUDO, SubName: Full=Uncharacterized protein {ECO:0000313|EMBL:JAF33689.1};
TRINITY_DN101163_c0_g1	0.129	0.15	0	0	0	0.067	GO:0000418,DNA-directed RNA polymerase IV complex; GO:0000419,DNA-directed RNA polymerase V complex; GO:0003677,DNA binding; GO:0003899,DNA-directed 5'-3' RNA polymerase activity; GO:0046983,protein dimerization activity; GO:0006366,transcription by RNA polymerase II	K03027: RPC40, POLR1C; DNA-directed RNA polymerases I and III subunit RPAC1	YPR110c	gb|POE49555.1|	RPD3B_ARATH, RecName: Full=DNA-directed RNA polymerases IV and V subunit 3B; AltName: Full=DNA-directed RNA polymerase II 36 kDa polypeptide B; AltName: Full=DNA-directed RNA polymerase II subunit RPB3-B; Short=RNA polymerase II subunit 3-B; Short=RNA polymerase II subunit B3-B;	M2XDV5_GALSU, SubName: Full=DNA-directed RNA polymerase III subunit C5 {ECO:0000313|EMBL:EME28182.1}; EC=2.7.7.6 {ECO:0000313|EMBL:EME28182.1};
TRINITY_DN101164_c0_g1	0	1.193	0	0	0	0	--	--	--	--	--	--
TRINITY_DN101165_c0_g1	0.259	0	0.493	0	0	0.154	--	--	--	--	--	--
TRINITY_DN101166_c0_g1	0	0	0	0	0	0	--	--	--	--	--	--
TRINITY_DN101167_c0_g1	0	0.451	0	0.104	0.093	0	--	--	SPCC1281.05	gb|POF13332.1|	--	--
TRINITY_DN101168_c0_g1	0.259	0.07	0	0	0.041	0.134	--	--	--	--	--	--
TRINITY_DN101168_c0_g2	0	0	0.171	0	0	0.067	--	--	--	--	--	--
TRINITY_DN101169_c0_g1	0.358	0	0	0	0	0	--	--	--	--	--	--
TRINITY_DN101170_c0_g1	0.189	0	0	0	0	0	GO:0009507,chloroplast; GO:0005739,mitochondrion; GO:0005524,ATP binding; GO:0004828,serine-tRNA ligase activity; GO:0009658,chloroplast organization; GO:0007005,mitochondrion organization; GO:0048481,plant ovule development; GO:0097056,selenocysteinyl-tRNA(Sec) biosynthetic process; GO:0006434,seryl-tRNA aminoacylation	K01875: SARS, serS; seryl-tRNA synthetase [EC:6.1.1.11]	At1g11870	gb|OAY81575.1|	SYSM_ARATH, RecName: Full=Serine--tRNA ligase, chloroplastic/mitochondrial {ECO:0000305}; EC=6.1.1.11 {ECO:0000305}; AltName: Full=AtSRS {ECO:0000303|PubMed:16107332}; AltName: Full=Protein OVULE ABORTION 7 {ECO:0000303|PubMed:16297076}; AltName: Full=Seryl-tRNA synthetase {ECO:0000305}; Short=SerRS {ECO:0000305}; AltName: Full=Seryl-tRNA(Ser/Sec) synthetase {ECO:0000305}; Flags: Precursor;	A0A199VXZ6_ANACO, SubName: Full=Serine--tRNA ligase, chloroplastic/mitochondrial {ECO:0000313|EMBL:OAY81575.1};
TRINITY_DN101171_c0_g1	0	0	0	0	0	4.553	--	--	--	--	--	--
TRINITY_DN101172_c1_g1	0	1.815	0	0	0	0	--	--	--	--	--	--
TRINITY_DN101173_c0_g1	0.477	0	0	0	0	0	--	--	--	--	--	--
TRINITY_DN101174_c0_g1	0.07	0.06	0	0	0.145	0.154	--	--	--	--	--	--
TRINITY_DN101175_c0_g1	0	0.03	0.161	0.057	0.165	0.048	--	K13348: MPV17; protein Mpv17	SPAC3G6.05	gb|POE47523.1|	--	A0A0P1B1Z5_9STRA, SubName: Full=Peroxisomal membrane protein MPV17 and related proteins {ECO:0000313|EMBL:CEG47802.1};
TRINITY_DN101175_c0_g2	0	0	0	0	0	1.162	--	--	--	--	--	--
TRINITY_DN101176_c0_g1	0	0	0	0.302	0.248	0.327	--	--	--	--	--	--
TRINITY_DN101176_c0_g2	0	0	0	0	0	0.778	--	--	--	--	--	--
TRINITY_DN101179_c0_g1	0	0	0	0.735	0	0	--	--	--	--	--	--
TRINITY_DN10117_c0_g1	0.348	0	0	0	0	0	--	--	--	ref|XP_001786506.1|	--	A0A291B0A8_GRALE, SubName: Full=Alpha galactosidase II {ECO:0000313|EMBL:ATE86697.1};
TRINITY_DN101182_c0_g1	0.318	0.14	0	0	0.155	0	--	--	--	--	--	--
TRINITY_DN101183_c0_g1	0	0	3.523	0	0	0	--	--	--	--	--	--
TRINITY_DN101184_c0_g1	0	0	0	0.132	0.196	0.423	--	--	--	--	--	--
TRINITY_DN101185_c0_g1	0	0	0	0	0	0	--	--	--	--	--	--
TRINITY_DN101185_c0_g2	0	0	0	0	0	0	--	--	--	--	--	--
TRINITY_DN101186_c0_g1	0	0.09	0	0.245	0.145	0	--	--	7298830	gb|POF17007.1|	--	K3XC76_PYTUL, SubName: Full=Uncharacterized protein {ECO:0000313|EnsemblProtists:PYU1_T014825};
TRINITY_DN101187_c0_g1	0.288	0	0	0	0	0	--	--	--	gb|PAN38248.1|	--	C5Y8T1_SORBI, SubName: Full=Uncharacterized protein {ECO:0000313|EMBL:EES12206.1};
TRINITY_DN101188_c0_g1	0	0	0.118	0.057	0.083	0	--	--	At5g49930	gb|POE93625.1|	--	Q9LTX7_ARATH, SubName: Full=Gb|AAF56406.1 {ECO:0000313|EMBL:BAA97014.1}; SubName: Full=Zinc knuckle (CCHC-type) family protein {ECO:0000313|EMBL:AED95872.1};
TRINITY_DN101189_c0_g1	0.159	0.13	0	0	0	0	--	--	--	gb|POE64150.1|	--	--
TRINITY_DN101190_c0_g1	0.517	0	0	0	0	0	GO:0071013,catalytic step 2 spliceosome; GO:0005634,nucleus; GO:0071014,post-mRNA release spliceosomal complex; GO:0071141,SMAD protein complex; GO:0003712,transcription cofactor activity; GO:0000350,generation of catalytic spliceosome for second transesterification step; GO:1901002,positive regulation of response to salt stress; GO:1902584,positive regulation of response to water deprivation; GO…	K06063: SNW1, SKIIP, SKIP; SNW domain-containing protein 1	At1g77180	ref|XP_008812966.2|	SKIPA_ORYSJ, RecName: Full=SNW/SKI-interacting protein A {ECO:0000305}; Short=OsSKIPa {ECO:0000303|PubMed:19339499};	A0A2H3ZG36_PHODC, SubName: Full=LOW QUALITY PROTEIN: SNW/SKI-interacting protein-like {ECO:0000313|RefSeq:XP_008812966.2};
TRINITY_DN101191_c0_g1	0	0.14	0	0.207	0	0	--	--	--	--	--	--
TRINITY_DN101192_c0_g1	0.249	0	0	0	0.196	0	GO:0005829,cytosol; GO:0008469,histone-arginine N-methyltransferase activity; GO:0035242,protein-arginine omega-N asymmetric methyltransferase activity; GO:0006355,regulation of transcription, DNA-templated	K11434: PRMT1; type I protein arginine methyltransferase [EC:2.1.1.319]	YBR034c	gb|AIU50558.1|	ANM6_ARATH, RecName: Full=Probable protein arginine N-methyltransferase 6; EC=2.1.1.-;	A0A1D1XTR3_9ARAE, SubName: Full=Uncharacterized protein {ECO:0000313|EMBL:JAT45780.1}; Flags: Fragment;
TRINITY_DN101193_c0_g1	0	0.341	0	0	0.258	0.279	--	--	--	--	--	--
TRINITY_DN101194_c0_g1	0	0	0	0	0	0	--	--	--	--	--	--
TRINITY_DN101196_c0_g1	0	0	0	0.697	0	0	--	--	--	--	--	--
TRINITY_DN101197_c0_g1	0	0	0	0	0	0	--	--	--	--	--	--
TRINITY_DN101197_c1_g1	0	0	0	0	0	0	--	--	--	--	--	--
TRINITY_DN101198_c0_g1	0	0.852	0	0	0	0	--	--	--	--	--	--
TRINITY_DN101198_c0_g2	0	0.201	0	0.075	0.114	0.067	--	--	--	dbj|GAQ78116.1|	--	K3XCQ7_PYTUL, SubName: Full=Uncharacterized protein {ECO:0000313|EnsemblProtists:PYU1_T015006};
TRINITY_DN101199_c0_g1	0	0	0	0	0	1.191	--	--	--	--	--	--
TRINITY_DN10119_c0_g1	0.368	0.1	0	0	0	0	GO:0020037,heme binding; GO:0030151,molybdenum ion binding; GO:0043546,molybdopterin cofactor binding; GO:0009703,nitrate reductase (NADH) activity; GO:0050464,nitrate reductase (NADPH) activity; GO:0042128,nitrate assimilation; GO:0006809,nitric oxide biosynthetic process	K00507: SCD, desC; stearoyl-CoA desaturase (Delta-9 desaturase) [EC:1.14.19.1]	SPCC1281.06c_2	dbj|BAJ91418.1|	NIA3_MAIZE, RecName: Full=Nitrate reductase [NADH] 3; Short=NR; EC=1.7.1.1;	F2D8J7_HORVV, SubName: Full=Predicted protein {ECO:0000313|EMBL:BAJ91418.1};
TRINITY_DN1011_c0_g1	0	0	0	0	0	0.749	--	--	--	--	--	--
TRINITY_DN101200_c0_g1	0	0	0	0	0	0	--	--	--	--	--	--
TRINITY_DN101201_c0_g1	0	0.03	0	0.094	0.124	0.048	--	--	--	--	--	--
TRINITY_DN101202_c0_g1	0.388	0	0	0	0	0.413	--	--	--	--	--	--
TRINITY_DN101203_c0_g1	0.458	0	0	0	0	0	--	--	At1g31410	dbj|BAF15684.1|	--	Q0JAF3_ORYSJ, SubName: Full=Os04g0602200 protein {ECO:0000313|EMBL:BAF15684.1}; Flags: Fragment;
TRINITY_DN101204_c0_g1	0	0	0	0.104	0.083	0.192	--	--	--	dbj|GAQ78838.1|	--	--
TRINITY_DN101205_c0_g1	0	0	0	0.198	0.165	0	--	--	--	--	--	--
TRINITY_DN101207_c0_g1	0.726	0.321	0	0	0	0	--	--	--	--	--	--
TRINITY_DN101209_c0_g1	0	0	0.182	0.17	0.145	0	--	--	SPCC162.09c	gb|POF07674.1|	--	--
TRINITY_DN101209_c0_g2	0	0	0	0	0.651	0	--	--	--	--	--	--
TRINITY_DN101210_c0_g1	0.865	0	0	0.141	0.352	0	GO:0005576,extracellular region; GO:0016787,hydrolase activity	K01061: E3.1.1.45; carboxymethylenebutenolidase [EC:3.1.1.45]	At3g23600	ref|XP_021751842.1|	E134_MAIZE, RecName: Full=Endo-1,3;1,4-beta-D-glucanase; EC=3.2.1.-; Flags: Precursor;	A0A0K9QYV4_SPIOL, SubName: Full=Uncharacterized protein {ECO:0000313|EMBL:KNA12447.1};
TRINITY_DN101212_c0_g1	0	0.12	0	0.17	0.145	0.077	--	--	--	--	--	--
TRINITY_DN101213_c0_g1	0	0.862	0	0	0	0	--	--	--	--	--	--
TRINITY_DN101214_c0_g1	2.109	0	0	0	0	0	--	--	--	--	--	--
TRINITY_DN101214_c0_g2	1.512	0	0	0	0	0	--	--	--	--	--	--
TRINITY_DN101215_c0_g1	0.388	0.01	0	0.019	0	0	--	--	--	--	--	--
TRINITY_DN101216_c0_g1	0	0.642	0	0	0	0	--	--	--	--	--	--
TRINITY_DN101217_c0_g1	0.865	0	0	0	0	0	--	--	--	--	--	--
TRINITY_DN101219_c0_g1	0	0	0	0	0.269	0	GO:0005618,cell wall; GO:0005576,extracellular region; GO:0047911,galacturan 1,4-alpha-galacturonidase activity; GO:0004650,polygalacturonase activity; GO:0005975,carbohydrate metabolic process; GO:0071555,cell wall organization	K01213: E3.2.1.67; galacturan 1,4-alpha-galacturonidase [EC:3.2.1.67]	At3g07850	ref|XP_021743514.1|	SALK6_KALTU, RecName: Full=Probable galacturan 1,4-alpha-galacturonidase SALK6 {ECO:0000305}; EC=3.2.1.67 {ECO:0000305}; AltName: Full=Exopolygalacturonase SALK6 {ECO:0000305}; AltName: Full=Pollen allergen Sal k 6 {ECO:0000303|PubMed:28502749}; AltName: Allergen=Sal k 6 {ECO:0000303|PubMed:28502749}; Flags: Precursor;	A0A2H4UZL0_KALTU, SubName: Full=Polygalacturonase {ECO:0000313|EMBL:AUA60206.1};
TRINITY_DN10121_c0_g1	0	0	2.367	0	0	0	--	--	--	--	--	--
TRINITY_DN101220_c0_g1	0	0	0	0	0.124	0.134	--	K17815: EXO5; exonuclease V [EC:3.1.-.-]	--	gb|POE93584.1|	--	B7ZXM0_MAIZE, SubName: Full=Uncharacterized protein {ECO:0000313|EMBL:ACL52669.1};
TRINITY_DN101222_c0_g1	0	0.191	0	0	0.217	0.471	--	--	--	--	--	--
TRINITY_DN101223_c0_g1	0	0.291	0	0	0	0.106	--	--	--	--	--	--
TRINITY_DN101224_c0_g1	0.189	0	0	0	0	0	--	--	--	--	--	--
TRINITY_DN101225_c0_g1	0.09	0.05	0.043	0	0.031	0.096	GO:0016021,integral component of membrane; GO:0009705,plant-type vacuole membrane; GO:0035618,root hair; GO:0005384,manganese ion transmembrane transporter activity; GO:0071421,manganese ion transmembrane transport	--	At1g79520	gb|POE86531.1|	MTPC3_ARATH, RecName: Full=Putative metal tolerance protein C3; Short=AtMTPc3; AltName: Full=AtMTP8;	A0A1Y5I712_OSTTA, SubName: Full=Cation diffusion facilitator 10 {ECO:0000313|EMBL:OUS43873.1};
TRINITY_DN101226_c0_g1	0.856	0	0	0	0	0	--	--	--	--	--	--
TRINITY_DN101227_c0_g1	0	0	0.129	0	0	0.106	--	--	--	--	--	--
TRINITY_DN101227_c1_g1	0.915	0	0	1.093	0	0	--	--	--	--	--	--
TRINITY_DN101228_c0_g1	0	0	0	0	0	0.221	--	--	--	--	--	--
TRINITY_DN101229_c0_g1	0	0	0	0	0	0.672	--	--	--	--	--	--
TRINITY_DN101230_c0_g1	0.995	0	0	0	0	0	--	--	--	--	--	--
TRINITY_DN101231_c0_g1	0.806	0	0	0	0	0	--	K03255: TIF31, CLU1; protein TIF31	--	ref|XP_019053362.1|	--	A0A1U8Q429_NELNU, RecName: Full=Clustered mitochondria protein homolog {ECO:0000256|HAMAP-Rule:MF_03013};
TRINITY_DN101232_c0_g1	0	0	0	0.283	0	0	--	--	--	--	--	--
TRINITY_DN101233_c0_g1	0	0	3.266	0	0	0	--	--	--	--	--	--
TRINITY_DN101234_c0_g1	1.054	0	0	0	0	0	--	--	--	--	--	--
TRINITY_DN101235_c0_g1	0.547	0	0	0	0	0	--	--	--	--	--	--
TRINITY_DN101236_c0_g1	0.398	0	0	0	0	0	--	--	--	--	--	--
TRINITY_DN101237_c0_g1	0	0	0	0	0.9	0	--	--	--	--	--	--
TRINITY_DN101238_c0_g1	0.398	0	0	0	0	0	--	K13459: RPS2; disease resistance protein RPS2	--	ref|XP_012702792.1|	--	A0A0D9W757_9ORYZ, SubName: Full=Uncharacterized protein {ECO:0000313|EnsemblPlants:LPERR04G15130.1};
TRINITY_DN101239_c0_g1	0.099	0.11	0	0.151	0.238	0.346	--	--	--	--	--	--
TRINITY_DN101239_c0_g2	0	0.09	0	0	0.207	0.115	--	--	--	--	--	--
TRINITY_DN10123_c0_g1	0.428	0	0	0	0	0	GO:0016021,integral component of membrane; GO:0005886,plasma membrane; GO:0005524,ATP binding; GO:0004675,transmembrane receptor protein serine/threonine kinase activity; GO:0009742,brassinosteroid mediated signaling pathway; GO:0007166,cell surface receptor signaling pathway; GO:0006468,protein phosphorylation	K04733: IRAK4; interleukin-1 receptor-associated kinase 4 [EC:2.7.11.1]	At5g10290	gb|AQK69834.1|	SERK4_ORYSJ, RecName: Full=LRR receptor kinase SERK2 {ECO:0000305}; EC=2.7.11.1 {ECO:0000305}; AltName: Full=BRI1-associated receptor kinase 1 homolog 5 {ECO:0000305}; Short=OsBAK1-5 {ECO:0000305}; AltName: Full=Somatic embryogenesis receptor kinase 4 {ECO:0000305}; Short=OsSERK4 {ECO:0000303|PubMed:19754838}; Flags: Precursor;	A0A1D6H4T3_MAIZE, SubName: Full=Putative LRR receptor-like serine/threonine-protein kinase {ECO:0000313|EMBL:AQK69834.1};
TRINITY_DN101240_c0_g1	0.288	0	0	0.113	0	0	--	--	--	--	--	--
TRINITY_DN101243_c0_g1	0	0.251	0	0.339	0	0	GO:0046872,metal ion binding; GO:0003676,nucleic acid binding; GO:0004523,RNA-DNA hybrid ribonuclease activity	K22804: SMC6; structural maintenance of chromosomes protein 6	At2g07650	gb|EEC80631.1|	RNHX1_ARATH, RecName: Full=Putative ribonuclease H protein At1g65750; EC=3.1.26.4;	T1M1C2_TRIUA, SubName: Full=Uncharacterized protein {ECO:0000313|EnsemblPlants:TRIUR3_11222-P1};
TRINITY_DN101244_c0_g1	0	0	0	0	0	0	--	--	--	--	--	--
TRINITY_DN101244_c0_g2	0	1.464	0	0	0	0	--	--	--	--	--	--
TRINITY_DN101244_c0_g3	0	0.913	0	0	0	0	--	--	--	--	--	--
TRINITY_DN101245_c0_g1	0.846	0	0	0	0	0	--	--	--	--	--	--
TRINITY_DN101246_c0_g1	0	0.08	0	0.094	0.114	0.288	--	--	--	--	--	--
TRINITY_DN101247_c0_g1	0	0.15	0	0.104	0.072	0.058	--	--	--	--	--	--
TRINITY_DN101248_c0_g1	0.458	0	0	0	0	0	--	--	At4g31410	gb|OEL17183.1|	--	A0A1E5UWE2_9POAL, SubName: Full=Uncharacterized protein {ECO:0000313|EMBL:OEL17183.1};
TRINITY_DN101248_c0_g2	0.995	0	0	0	0	0	--	--	--	--	--	--
TRINITY_DN101249_c0_g1	0	0	0.493	0	0	0	--	--	--	--	--	--
TRINITY_DN10124_c0_g1	0	0	0	0	0	0	--	--	--	--	--	--
TRINITY_DN101251_c0_g1	0.497	0	0	0	0	0.279	--	--	--	--	--	--
TRINITY_DN101254_c0_g1	0.06	0.261	0	0.123	0.196	0	--	--	Hs20541596	gb|POF16349.1|	--	A0A1D1XZ61_9ARAE, SubName: Full=Transmembrane emp24 domain-containing protein 9 {ECO:0000313|EMBL:JAT47689.1};
TRINITY_DN101255_c0_g1	1.045	0	0	0	0	0	--	--	--	--	--	--
TRINITY_DN101257_c0_g1	0.577	0	0	0	0	0	--	--	--	ref|XP_020090154.1|	--	A0A199UXS0_ANACO, SubName: Full=Dual specificity protein kinase splA {ECO:0000313|EMBL:OAY69411.1}; Flags: Fragment;
TRINITY_DN101257_c1_g1	2.676	0	0	0	0	0	--	--	--	--	--	--
TRINITY_DN101258_c0_g1	0	0	0	0	0	1.451	--	--	--	--	--	--
TRINITY_DN101259_c0_g1	0.159	0.04	0	0.047	0.165	0	--	--	--	--	--	--
TRINITY_DN10125_c0_g1	0.428	0	0	0	0	0	--	--	--	--	--	--
TRINITY_DN101260_c0_g1	0	0.231	0	0	0.134	0.432	--	K17604: ZSWIM3; zinc finger SWIM domain-containing protein 3	At3g04605	ref|XP_021320636.1|	--	A0A0E0C1B6_9ORYZ, SubName: Full=Uncharacterized protein {ECO:0000313|EnsemblPlants:OMERI01G12550.1};
TRINITY_DN101263_c0_g1	2.029	0	0	0	0	0	--	--	--	--	--	--
TRINITY_DN101265_c1_g1	0	0	0	0	0	1.057	--	--	--	--	--	--
TRINITY_DN101266_c0_g1	0.139	0.02	0.118	0	0.279	0.019	--	--	--	--	--	--
TRINITY_DN101266_c1_g1	0.259	0.09	0	0	0	0.192	--	--	--	--	--	--
TRINITY_DN101267_c0_g1	0	0.491	0	0	0	0	--	--	--	--	--	--
TRINITY_DN101269_c0_g1	0	0	0	0	0	0	--	--	--	--	--	--
TRINITY_DN101269_c0_g2	1.522	0	0	0	0	0	--	--	--	--	--	--
TRINITY_DN10126_c0_g1	0.209	0	0	0.123	0	0.115	--	--	At5g38900	gb|PLY79582.1|	--	A0A1J6JTT4_NICAT, SubName: Full=Uncharacterized protein {ECO:0000313|EMBL:OIT21141.1};
TRINITY_DN101270_c0_g1	0.517	0	0	0	0	0.183	--	--	--	--	--	--
TRINITY_DN101271_c0_g1	0.229	0	0.3	0	0	0	--	--	--	--	--	--
TRINITY_DN101272_c0_g1	0.557	0	0	0	0	0	GO:0005794,Golgi apparatus; GO:0016021,integral component of membrane	--	At5g36290	ref|XP_019160801.1|	GDT13_ARATH, RecName: Full=GDT1-like protein 3; Flags: Precursor;	A0A022RHN1_ERYGU, SubName: Full=Uncharacterized protein {ECO:0000313|EMBL:EYU39706.1};
TRINITY_DN101273_c0_g1	0	0	1.628	0	0	0	--	--	--	--	--	--
TRINITY_DN101274_c0_g1	0.448	0	0	0	0	0	--	--	--	--	--	--
TRINITY_DN101275_c0_g1	1.751	0	0	0	0	0	--	--	--	--	--	--
TRINITY_DN101276_c0_g1	0	0.11	0.278	0.132	0.124	0.48	GO:0070772,PAS complex; GO:0043550,regulation of lipid kinase activity	--	SPBC25H2.03	gb|POF14954.1|	VAC14_ARATH, RecName: Full=Protein VAC14 homolog;	A0A1D1Y5K6_9ARAE, SubName: Full=Protein VAC14 {ECO:0000313|EMBL:JAT49876.1}; Flags: Fragment;
TRINITY_DN101278_c0_g1	0.099	0.03	0	0.085	0.145	0.077	--	K01081: E3.1.3.5; 5'-nucleotidase [EC:3.1.3.5]	7303718	gb|POF15375.1|	--	A8IDC5_CHLRE, SubName: Full=5'-nucleotidase {ECO:0000313|EMBL:EDP06082.1};
TRINITY_DN101279_c0_g1	0	0	0	0	0	0.817	--	--	--	--	--	--
TRINITY_DN10127_c0_g1	0	0.772	1.146	0	0	0	--	--	--	--	--	--
TRINITY_DN101280_c0_g1	0	0.16	0	0.424	0.176	0.192	GO:0009507,chloroplast; GO:0005525,GTP binding; GO:0003924,GTPase activity; GO:0003743,translation initiation factor activity	K02519: infB, MTIF2; translation initiation factor IF-2	At4g11160	gb|POE98296.1|	IF2C_PORPU, RecName: Full=Translation initiation factor IF-2, chloroplastic;	A0A1J7FYW0_LUPAN, SubName: Full=Uncharacterized protein {ECO:0000313|EMBL:OIV93339.1};
TRINITY_DN101281_c0_g1	0	0.04	0.096	0.094	0.372	0	--	--	--	--	--	--
TRINITY_DN101282_c0_g1	0	0.13	0	0.16	0	0.086	--	--	SPCC622.17	gb|POE47992.1|	--	T0QHK6_9STRA, SubName: Full=AP endonuclease 1 {ECO:0000313|EMBL:EQC34231.1};
TRINITY_DN101282_c1_g1	0	0	4.07	1.602	2.688	1.643	--	--	--	--	--	--
TRINITY_DN101283_c0_g1	0.05	0	0.064	0	0.238	0.115	--	--	--	--	--	--
TRINITY_DN101284_c0_g1	0.03	0.04	0	0.038	0.134	0.038	GO:0012505,endomembrane system; GO:0016021,integral component of membrane; GO:0016020,membrane; GO:0020037,heme binding; GO:0005496,steroid binding	K17278: PGRMC1_2; membrane-associated progesterone receptor component	At4g14950_2	ref|XP_022741082.1|	MAPR4_ARATH, RecName: Full=Membrane-associated progesterone-binding protein 4 {ECO:0000303|Ref.7}; Short=AtMAPR4 {ECO:0000303|Ref.7};	A0A1D1Z2S9_9ARAE, SubName: Full=Membrane steroid-binding protein 1 {ECO:0000313|EMBL:JAT61235.1};
TRINITY_DN101286_c0_g1	0	0	0	0	0	0	--	--	--	--	--	--
TRINITY_DN101287_c0_g1	1.99	0	0	0	0	0	--	--	--	--	--	--
TRINITY_DN101288_c0_g1	0	0.09	0.118	0	0.062	0.115	--	--	--	--	--	--
TRINITY_DN101289_c0_g1	0.08	0.15	0.096	0	0	0.221	--	--	--	--	--	--
TRINITY_DN101289_c0_g2	0	0	0	0.17	0.093	0	--	--	--	--	--	--
TRINITY_DN101290_c0_g1	0	0.07	0	0.188	0.331	0.576	--	--	--	--	--	--
TRINITY_DN101291_c0_g1	1.81	0	0	0	0	0	GO:0005737,cytoplasm; GO:0035145,exon-exon junction complex; GO:0005730,nucleolus; GO:0048471,perinuclear region of cytoplasm; GO:0005844,polysome; GO:0003729,mRNA binding; GO:0042742,defense response to bacterium; GO:0009867,jasmonic acid mediated signaling pathway; GO:0048571,long-day photoperiodism; GO:0000184,nuclear-transcribed mRNA catabolic process, nonsense-mediated decay; GO:0009611,resp…	K14327: UPF2, RENT2; regulator of nonsense transcripts 2	At2g39260	ref|XP_011083296.1|	RENT2_ARATH, RecName: Full=Regulator of nonsense transcripts UPF2; AltName: Full=Nonsense mRNA reducing factor UPF2; AltName: Full=Up-frameshift suppressor 2 homolog; Short=AtUpf2;	A0A1U7ZJZ5_NELNU, SubName: Full=regulator of nonsense transcripts UPF2 isoform X2 {ECO:0000313|RefSeq:XP_010253476.1};
TRINITY_DN101292_c0_g1	0.557	0	0.182	0.085	0	0	--	--	--	--	--	--
TRINITY_DN101293_c0_g1	0	0	0	0	0	0	--	--	--	--	--	--
TRINITY_DN101293_c0_g2	2.447	0	0	0	0	0	--	--	--	--	--	--
TRINITY_DN101294_c0_g1	0.448	0	0	0	0	0	GO:0005874,microtubule; GO:0005634,nucleus; GO:0009524,phragmoplast; GO:0005819,spindle; GO:0000922,spindle pole; GO:0008017,microtubule binding; GO:0000910,cytokinesis; GO:0000226,microtubule cytoskeleton organization	K16732: PRC1; protein regulator of cytokinesis 1	At1g27920	ref|XP_020087730.1|	MA658_ARATH, RecName: Full=65-kDa microtubule-associated protein 8; Short=AtMAP65-8;	A0A199WA24_ANACO, SubName: Full=65-kDa microtubule-associated protein 8 {ECO:0000313|EMBL:OAY86081.1}; Flags: Fragment;
TRINITY_DN101295_c0_g1	0	0	0	0	0	0.682	--	--	--	--	--	--
TRINITY_DN101295_c0_g2	0	0.15	0	0	0	0.365	--	--	--	gb|POF03506.1|	--	--
TRINITY_DN101296_c0_g1	0	0	0	0.264	0.103	0.163	--	--	--	--	--	--
TRINITY_DN101296_c1_g1	0	0.632	0	0	0	0	--	--	--	--	--	--
TRINITY_DN101297_c0_g1	0	0	0	0	0.434	0.442	--	K00815: TAT; tyrosine aminotransferase [EC:2.6.1.5]	At2g17910	ref|XP_015619246.1|	--	A0A1D6DJ65_WHEAT, SubName: Full=Uncharacterized protein {ECO:0000313|EnsemblPlants:TRIAE_CS42_U_TGACv1_643645_AA2133880.1};
TRINITY_DN101298_c0_g1	0.597	0	0	0	0	0	GO:0005777,peroxisome; GO:0003987,acetate-CoA ligase activity; GO:0047760,butyrate-CoA ligase activity; GO:0006083,acetate metabolic process; GO:0019605,butyrate metabolic process; GO:0006097,glyoxylate cycle	K01913: AAE7, ACN1; acetate---CoA ligase [EC:6.2.1.1]	At3g16910	ref|XP_015631446.1|	AEE7_ARATH, RecName: Full=Acetate/butyrate--CoA ligase AAE7, peroxisomal; EC=6.2.1.1; EC=6.2.1.2; AltName: Full=AMP-binding protein 7; Short=AtAMPBP7; AltName: Full=Acetyl-CoA synthetase; AltName: Full=Acyl-activating enzyme 7; AltName: Full=Butyryl-CoA synthetase; AltName: Full=Protein ACETATE NON-UTILIZING 1;	A0A0E0NTZ8_ORYRU, SubName: Full=Uncharacterized protein {ECO:0000313|EnsemblPlants:ORUFI03G15120.2};
TRINITY_DN101299_c0_g1	0.308	0	0	0	0	0	--	--	--	--	--	--
TRINITY_DN10129_c0_g1	0	0	0.278	0	0	0.096	--	--	--	--	--	--
TRINITY_DN101300_c0_g1	0.149	0.1	0	0.075	0.041	0.115	GO:0005886,plasma membrane; GO:0005773,vacuole; GO:0000155,phosphorelay sensor kinase activity; GO:0070301,cellular response to hydrogen peroxide; GO:0071219,cellular response to molecule of bacterial origin; GO:0071732,cellular response to nitric oxide; GO:0009736,cytokinin-activated signaling pathway; GO:0009788,negative regulation of abscisic acid-activated signaling pathway; GO:0010105,negati…	K19691: NIK1, TCSC; osomolarity two-component system, sensor histidine kinase NIK1 [EC:2.7.13.3]	At5g10720	gb|POE75476.1|	OHK1_ORYSI, RecName: Full=Probable histidine kinase 1 {ECO:0000305}; Short=OsHK1 {ECO:0000305}; EC=2.7.13.3 {ECO:0000305};	W2XEL9_PHYPR, SubName: Full=Uncharacterized protein {ECO:0000313|EMBL:ETP21340.1};
TRINITY_DN101301_c0_g1	0.358	0	0	0	0	0	GO:0005783,endoplasmic reticulum; GO:0005886,plasma membrane; GO:0004252,serine-type endopeptidase activity; GO:0010074,maintenance of meristem identity; GO:0040008,regulation of growth	K13199: SERBP1; plasminogen activator inhibitor 1 RNA-binding protein	At5g59810	gb|OAY66986.1|	SBT54_ARATH, RecName: Full=Subtilisin-like protease SBT5.4 {ECO:0000303|PubMed:16193095}; EC=3.4.21.- {ECO:0000305}; AltName: Full=Subtilase subfamily 5 member 4 {ECO:0000303|PubMed:16193095}; Short=AtSBT5.4 {ECO:0000303|PubMed:16193095}; Flags: Precursor;	A0A199UQP8_ANACO, SubName: Full=Subtilisin-like protease SBT5.4 {ECO:0000313|EMBL:OAY66986.1};
TRINITY_DN101302_c0_g1	0.149	0.07	0.043	0	0.155	0	--	--	--	gb|AQK75750.1|	--	A0A1D6HN74_MAIZE, SubName: Full=Transcription factor bHLH69 {ECO:0000313|EMBL:AQK75750.1};
TRINITY_DN101303_c0_g1	0	0	0	0	0	0	GO:0005737,cytoplasm; GO:0003729,mRNA binding; GO:0046719,regulation by virus of viral protein levels in host cell; GO:0009735,response to cytokinin; GO:0008380,RNA splicing	K14944: NOVA; RNA-binding protein Nova	At5g04430	ref|XP_002453064.1|	BTR1_ARATH, RecName: Full=Protein BTR1 {ECO:0000303|PubMed:18762309}; AltName: Full=Binding to ToMV RNA 1 {ECO:0000303|PubMed:18762309};	C5XW10_SORBI, SubName: Full=Uncharacterized protein {ECO:0000313|EMBL:EES06040.1};
TRINITY_DN101304_c0_g1	1.423	0	0	0	0	0	GO:0005634,nucleus; GO:0140078,class I DNA-(apurinic or apyrimidinic site) endonuclease activity; GO:0140080,class III/IV DNA-(apurinic or apyrimidinic site) endonuclease activity; GO:0003906,DNA-(apurinic or apyrimidinic site) endonuclease activity; GO:0008311,double-stranded DNA 3'-5' exodeoxyribonuclease activity; GO:0004519,endonuclease activity; GO:0008270,zinc ion binding; GO:0006284,base-e…	K10772: APEX2; AP endonuclease 2 [EC:4.2.99.18]	At4g36050	ref|XP_020277030.1|	APE2_ARATH, RecName: Full=DNA-(apurinic or apyrimidinic site) lyase 2 {ECO:0000303|PubMed:19172180}; EC=4.2.99.18 {ECO:0000269|PubMed:25569774}; AltName: Full=Apurinic-apyrimidinic endonuclease 2;	A0A200RAC5_9MAGN, SubName: Full=Exodeoxyribonuclease III xth {ECO:0000313|EMBL:OVA19651.1};
TRINITY_DN101305_c0_g1	0.149	0	0	0.217	0.124	0.106	GO:0009507,chloroplast; GO:0005524,ATP binding; GO:0046872,metal ion binding; GO:0004638,phosphoribosylaminoimidazole carboxylase activity; GO:0006189,'de novo' IMP biosynthetic process	K11808: ADE2; phosphoribosylaminoimidazole carboxylase [EC:4.1.1.21]	YOR128c	gb|POE93619.1|	PUR6_VIGAC, RecName: Full=Phosphoribosylaminoimidazole carboxylase, chloroplastic; EC=4.1.1.21; AltName: Full=AIR carboxylase; Short=AIRC; Flags: Precursor; Fragment;	G4ZRQ2_PHYSP, SubName: Full=Uncharacterized protein {ECO:0000313|EMBL:EGZ13861.1};
TRINITY_DN101306_c0_g1	0	0.893	0	0	0	0	--	--	--	--	--	--
TRINITY_DN101309_c0_g1	0.109	0.16	0.139	0	0	0	--	--	CE23503	emb|CDL67988.1|	--	W1I936_OLEEU, SubName: Full=Putative filamin like protein {ECO:0000313|EMBL:CDL67988.1}; Flags: Fragment;
TRINITY_DN101310_c0_g1	0	0.1	0	0	0	0	--	--	--	--	--	--
TRINITY_DN101311_c0_g1	0	0	0	0.217	0.176	0	GO:0005789,endoplasmic reticulum membrane; GO:0000139,Golgi membrane; GO:0034045,phagophore assembly site membrane; GO:0005525,GTP binding; GO:0003924,GTPase activity; GO:0006914,autophagy; GO:0015031,protein transport	K07874: RAB1A; Ras-related protein Rab-1A	Hs4758988	gb|POF11427.1|	YPT1_PHYIN, RecName: Full=Ras-like GTP-binding protein YPT1;	A0A1E7G009_9STRA, SubName: Full=GTP-binding protein yptV1 {ECO:0000313|EMBL:OEU23715.1};
TRINITY_DN101312_c0_g1	0	0	0.461	0	0	0	--	--	--	--	--	--
TRINITY_DN101313_c0_g1	0.647	0	0	0	0	0	--	K10656: MARCH1_8; E3 ubiquitin-protein ligase MARCH1/8 [EC:2.3.2.27]	At1g11020	ref|XP_020098801.1|	--	A0A199VA59_ANACO, SubName: Full=Uncharacterized protein {ECO:0000313|EMBL:OAY73670.1}; Flags: Fragment;
TRINITY_DN101314_c0_g1	0.766	0	0	0	0	0	--	--	--	--	--	--
TRINITY_DN101315_c0_g1	1.353	0	0	0	0	0	--	K00555: TRMT1, trm1; tRNA (guanine26-N2/guanine27-N2)-dimethyltransferase [EC:2.1.1.215 2.1.1.216]	At3g56330	ref|XP_008808315.1|	--	A0A2H3Z562_PHODC, RecName: Full=tRNA (guanine(26)-N(2))-dimethyltransferase {ECO:0000256|PROSITE-ProRule:PRU00958}; EC=2.1.1.216 {ECO:0000256|PROSITE-ProRule:PRU00958};
TRINITY_DN101316_c0_g1	0	0	0	0.179	0.3	0	--	--	--	--	--	--
TRINITY_DN101317_c0_g1	0.776	0	0	0	0	0	--	--	--	--	--	--
TRINITY_DN101318_c0_g1	0.597	0	0	0	0	0	--	--	--	--	--	--
TRINITY_DN101320_c0_g1	0.02	0.05	0.15	0	0.093	0	--	--	--	--	--	--
TRINITY_DN101322_c0_g1	0	0	0	0	0	1.057	--	--	--	--	--	--
TRINITY_DN101322_c0_g2	0.249	0.1	0	0.075	0	0	--	--	--	--	--	--
TRINITY_DN101324_c1_g1	0	0	0	0	0	0	--	--	--	--	--	--
TRINITY_DN101325_c0_g1	0.378	0	0	0	0	0	--	K09598: SPPL3; signal peptide peptidase-like 3 [EC:3.4.23.-]	--	ref|XP_020248819.1|	--	A0A2H4A0T8_PHODC, SubName: Full=SPX and EXS domain-containing protein 1-like isoform X2 {ECO:0000313|RefSeq:XP_017702035.1, ECO:0000313|RefSeq:XP_017702036.1};
TRINITY_DN101327_c0_g1	1.393	0	0	0	0	0	--	--	--	--	--	--
TRINITY_DN101328_c0_g1	0.109	0.612	0.139	0.047	0.114	0	--	--	--	--	--	--
TRINITY_DN101328_c1_g1	0	0.17	0.75	0.226	0	0	--	--	--	--	--	--
TRINITY_DN101329_c0_g1	0.05	0.14	0.064	0	0	0	--	K15920: XYL4; xylan 1,4-beta-xylosidase [EC:3.2.1.37]	SPBC1683.04	gb|OAO89126.1|	--	A0A0M0LQC8_9EUKA, SubName: Full=Glycoside hydrolase family 3 domain protein {ECO:0000313|EMBL:KOO53244.1};
TRINITY_DN101329_c0_g2	0	2.216	0	0	0	0	--	--	--	--	--	--
TRINITY_DN101330_c0_g1	0.816	0	0	0	0	0	--	--	--	--	--	--
TRINITY_DN101330_c0_g2	0.04	0.13	0.161	0	0	0	--	--	--	--	--	--
TRINITY_DN101331_c0_g1	0.338	0	0	0	0	0	GO:0036459,thiol-dependent ubiquitinyl hydrolase activity; GO:0016579,protein deubiquitination; GO:0006511,ubiquitin-dependent protein catabolic process	K11839: USP8, UBP5; ubiquitin carboxyl-terminal hydrolase 8 [EC:3.4.19.12]	Hs4827054	ref|XP_005645353.1|	UBP8_ARATH, RecName: Full=Ubiquitin carboxyl-terminal hydrolase 8; EC=3.4.19.12; AltName: Full=Deubiquitinating enzyme 8; Short=AtUBP8; AltName: Full=Ubiquitin thioesterase 8; AltName: Full=Ubiquitin-specific-processing protease 8;	I0YQZ0_COCSC, SubName: Full=Peptidase C19, ubiquitin carboxyl-terminal hydrolase 2 {ECO:0000313|EMBL:EIE20809.1}; Flags: Fragment;
TRINITY_DN101331_c0_g2	0.358	0	0	0	0	0	--	--	--	--	--	--
TRINITY_DN101332_c0_g1	0	0	0	0	2.12	2.69	--	--	--	--	--	--
TRINITY_DN101333_c0_g1	0.438	0.391	0	0	0.207	0	--	--	--	--	--	--
TRINITY_DN101334_c0_g1	0	0	0	0.556	0	0	--	--	--	--	--	--
TRINITY_DN101334_c0_g2	0	0	0	0	0.062	0.067	--	--	--	--	--	--
TRINITY_DN101336_c0_g1	0	0	0	0	0	0.576	--	--	--	--	--	--
TRINITY_DN101337_c0_g1	0	0	0	0	0	1.306	--	--	--	--	--	--
TRINITY_DN101338_c0_g1	0.279	0.221	0	0.188	0.786	0.307	--	--	--	--	--	--
TRINITY_DN101338_c0_g2	0	0	0	0.499	0	0.471	--	--	--	--	--	--
TRINITY_DN101339_c0_g1	0	0	0	0	0.579	0.086	--	--	--	--	--	--
TRINITY_DN101340_c0_g1	0	0	0	0	0.414	0	--	--	--	--	--	--
TRINITY_DN101340_c0_g2	0	0.802	0	0	0	0	--	--	--	--	--	--
TRINITY_DN101341_c0_g1	0.358	0	0	0	0.341	0.192	--	K01951: guaA, GMPS; GMP synthase (glutamine-hydrolysing) [EC:6.3.5.2]	SPAP7G5.02c	gb|POE72095.1|	--	A0A1X6P0Y5_PORUM, SubName: Full=Uncharacterized protein {ECO:0000313|EMBL:OSX74522.1};
TRINITY_DN101343_c0_g1	0.08	0.1	0	0	0	0	--	--	--	gb|POE53432.1|	--	--
TRINITY_DN101344_c0_g1	0	0	0	0	0	0	--	--	--	--	--	--
TRINITY_DN101345_c0_g1	0.07	0.05	0.086	0.179	0.01	0.01	--	--	--	--	--	--
TRINITY_DN101347_c0_g1	0.667	0	0	0	0	0	GO:0019887,protein kinase regulator activity; GO:0005975,carbohydrate metabolic process; GO:0043562,cellular response to nitrogen levels; GO:0009744,response to sucrose	K07199: PRKAB; 5'-AMP-activated protein kinase, regulatory beta subunit	At2g28060	ref|XP_020165022.1|	KINB3_ARATH, RecName: Full=SNF1-related protein kinase regulatory subunit beta-3; Short=AKIN subunit beta-3; Short=AKINB3; Short=AKINbeta3;	J3MWX1_ORYBR, SubName: Full=Uncharacterized protein {ECO:0000313|EnsemblPlants:OB09G15000.1};
TRINITY_DN101348_c0_g1	0	0	0	0	0	0	--	--	--	--	--	--
TRINITY_DN101349_c0_g1	0.547	0.501	0	0	0.517	0	--	--	--	--	--	--
TRINITY_DN101349_c1_g1	0.119	0	0	0.066	0.114	0.173	--	--	--	--	--	--
TRINITY_DN101350_c0_g1	0.269	0	0	0	0	0	GO:0009507,chloroplast; GO:0009941,chloroplast envelope; GO:0009706,chloroplast inner membrane; GO:0016021,integral component of membrane; GO:0009536,plastid; GO:0005524,ATP binding; GO:0016887,ATPase activity; GO:0008551,cadmium-exporting ATPase activity; GO:0046872,metal ion binding; GO:0016463,zinc-exporting ATPase activity; GO:0015633,zinc-transporting ATPase activity; GO:0006878,cellular cop…	K01534: zntA; Cd2+/Zn2+-exporting ATPase [EC:3.6.3.3 3.6.3.5]	At4g37270	gb|OAY77086.1|	HMA1_ARATH, RecName: Full=Probable cadmium/zinc-transporting ATPase HMA1, chloroplastic; EC=3.6.3.3; EC=3.6.3.5; AltName: Full=Protein HEAVY METAL ATPASE 1; Flags: Precursor;	A0A199VJM9_ANACO, SubName: Full=Putative cadmium/zinc-transporting ATPase HMA1, chloroplastic {ECO:0000313|EMBL:OAY77086.1};
TRINITY_DN101351_c0_g1	0.189	0	0.214	0.038	0.145	0.144	--	--	--	--	--	--
TRINITY_DN101352_c0_g1	6.098	0	0	0	0	0	--	--	--	--	--	--
TRINITY_DN101353_c0_g1	0.05	0	0	0.17	0	0.067	--	--	SPAC2E1P5.03	gb|POE51556.1|	--	--
TRINITY_DN101354_c0_g1	0.627	0	0	0	0	0	GO:0016021,integral component of membrane; GO:0050832,defense response to fungus	K11968: ARIH1; ariadne-1 [EC:2.3.2.31]	At3g59660	ref|XP_020105002.1|	BAGP1_ARATH, RecName: Full=BAG-associated GRAM protein 1 {ECO:0000303|PubMed:26739014};	A0A199VA60_ANACO, SubName: Full=Protein VASCULAR ASSOCIATED DEATH 1, chloroplastic {ECO:0000313|EMBL:OAY73908.1};
TRINITY_DN101355_c0_g1	0	0	0	0	0	0	--	--	--	--	--	--
TRINITY_DN101356_c0_g1	0.06	0.211	0	0	0.062	0.528	--	--	--	--	--	--
TRINITY_DN101358_c0_g1	0	0.16	0	0	0.238	0.154	GO:0005737,cytoplasm; GO:0005634,nucleus; GO:0004601,peroxidase activity; GO:0051920,peroxiredoxin activity; GO:0045454,cell redox homeostasis	K11188: PRDX6; peroxiredoxin 6, 1-Cys peroxiredoxin [EC:1.11.1.7 1.11.1.15 3.1.1.-]	YBL064c	gb|POE86984.1|	REHY_HORVU, RecName: Full=1-Cys peroxiredoxin PER1; EC=1.11.1.15; AltName: Full=B15C; AltName: Full=Rehydrin homolog; AltName: Full=Thioredoxin peroxidase;	A0A1D1YTX3_9ARAE, SubName: Full=Mitochondrial peroxiredoxin PRX1 {ECO:0000313|EMBL:JAT58074.1};
TRINITY_DN101359_c0_g1	0.965	0	0.15	0	0	0	--	--	Hs18556170_1	--	--	--
TRINITY_DN10135_c0_g1	0	0	0	0	0	0	--	--	--	--	--	--
TRINITY_DN10135_c0_g2	0	0	0.15	0	0.124	0.173	--	--	--	--	--	--
TRINITY_DN101360_c0_g1	0	0.491	0	0	0	0	--	--	--	--	--	--
TRINITY_DN101362_c0_g1	0.109	0	0	0.066	0.052	0	--	K14794: RRP12; ribosomal RNA-processing protein 12	YPL012w	gb|POE65985.1|	--	A9RFV8_PHYPA, SubName: Full=Uncharacterized protein {ECO:0000313|EMBL:EDQ82138.1};
TRINITY_DN101365_c0_g1	0	0	0	0	0	0.48	--	--	--	--	--	--
TRINITY_DN101366_c0_g1	1.303	0	0	0	0	0	--	--	--	gb|POF18056.1|	--	--
TRINITY_DN101366_c0_g2	0.378	0	0	0	0	0	--	--	--	gb|POF18056.1|	--	--
TRINITY_DN101367_c0_g1	0	4.483	0	0	1.52	0	--	--	--	--	--	--
TRINITY_DN101368_c0_g1	0.567	0	0	0	0	0	--	--	--	--	--	--
TRINITY_DN101368_c0_g2	0.587	0	0	0	0	0	--	--	--	--	--	--
TRINITY_DN101368_c1_g1	1.084	0	0	0	0	0	--	--	--	--	--	--
TRINITY_DN101369_c0_g1	0	0	0	0	0	0	--	--	--	--	--	--
TRINITY_DN101370_c0_g1	0.358	0	0	0	0.465	0	--	--	SPCC965.15	gb|POF18621.1|	--	--
TRINITY_DN101371_c0_g1	0	0	0	0	0	0	--	--	--	--	--	--
TRINITY_DN101371_c1_g1	0	0	0	0	0	0	--	--	--	--	--	--
TRINITY_DN101372_c0_g1	0.06	0	0	0	0.176	0.058	GO:0009507,chloroplast; GO:0009941,chloroplast envelope; GO:0010291,carotene beta-ring hydroxylase activity; GO:0020037,heme binding; GO:0005506,iron ion binding; GO:0016705,oxidoreductase activity, acting on paired donors, with incorporation or reduction of molecular oxygen; GO:0016117,carotenoid biosynthetic process; GO:0016123,xanthophyll biosynthetic process	K15747: LUT5, CYP97A3; beta-ring hydroxylase [EC:1.14.-.-]	At1g31800	--	LUT5_ARATH, RecName: Full=Protein LUTEIN DEFICIENT 5, chloroplastic; EC=1.14.-.-; AltName: Full=Cytochrome P450 97A3; Flags: Precursor;	--
TRINITY_DN101372_c0_g2	0	0.12	0	0.33	0.134	0.154	GO:0009507,chloroplast; GO:0009941,chloroplast envelope; GO:0010291,carotene beta-ring hydroxylase activity; GO:0020037,heme binding; GO:0005506,iron ion binding; GO:0016705,oxidoreductase activity, acting on paired donors, with incorporation or reduction of molecular oxygen; GO:0016117,carotenoid biosynthetic process; GO:0016123,xanthophyll biosynthetic process	K15747: LUT5, CYP97A3; beta-ring hydroxylase [EC:1.14.-.-]	At1g31800	gb|POE49476.1|	LUT5_ARATH, RecName: Full=Protein LUTEIN DEFICIENT 5, chloroplastic; EC=1.14.-.-; AltName: Full=Cytochrome P450 97A3; Flags: Precursor;	A0A1E7EYH2_9STRA, SubName: Full=Cytochrome P450 {ECO:0000313|EMBL:OEU11060.1}; Flags: Fragment;
TRINITY_DN101372_c0_g3	0	0	0	0	0	0.557	--	--	--	--	--	--
TRINITY_DN101374_c0_g1	0	0	0.621	0.575	0	0.259	--	--	--	--	--	--
TRINITY_DN101375_c0_g1	0	0	0	4.137	0	0	--	--	--	--	--	--
TRINITY_DN101376_c0_g1	0	0.531	0	0.924	0	0.269	--	--	--	--	--	--
TRINITY_DN101377_c0_g1	0	0.15	0.043	0.236	0.103	0.115	--	--	--	gb|POE89738.1|	--	--
TRINITY_DN101378_c0_g1	0	0	0	0.075	0	0.144	--	--	--	--	--	--
TRINITY_DN101379_c0_g1	0.229	0	0	0	0	0	--	--	--	--	--	--
TRINITY_DN101380_c0_g1	0.398	0	0	0	0	0	--	K01049: ACHE; acetylcholinesterase [EC:3.1.1.7]	Hs4557239	--	--	R7QUT2_CHOCR, RecName: Full=Carboxylic ester hydrolase {ECO:0000256|RuleBase:RU361235}; EC=3.1.1.- {ECO:0000256|RuleBase:RU361235};
TRINITY_DN101381_c0_g1	0.08	0	0	0	0	0	--	--	--	--	--	--
TRINITY_DN101381_c0_g2	0	0.572	0	0	0	0	--	--	--	--	--	--
TRINITY_DN101382_c0_g1	0	0	0	0	0	0.644	--	--	--	--	--	--
TRINITY_DN101383_c0_g1	0	0.03	0.043	0.113	0	0.038	--	--	--	--	--	--
TRINITY_DN101384_c0_g1	0	0	0	0.697	0.558	0	--	--	--	--	--	--
TRINITY_DN101384_c1_g1	0	0	0	0.792	0.321	0.375	--	--	--	--	--	--
TRINITY_DN101385_c0_g1	0	0	0.246	0.66	0	0.202	GO:0000785,chromatin; GO:0000118,histone deacetylase complex; GO:0001106,RNA polymerase II transcription corepressor activity; GO:0016575,histone deacetylation; GO:0000122,negative regulation of transcription by RNA polymerase II; GO:0045892,negative regulation of transcription, DNA-templated; GO:0009737,response to abscisic acid; GO:0006351,transcription, DNA-templated	K11644: SIN3A; paired amphipathic helix protein Sin3a	YOL004w	ref|XP_009350876.1|	SNL3_ARATH, RecName: Full=Paired amphipathic helix protein Sin3-like 3; AltName: Full=Histone deacetylase complex subunit Sin3; Short=AtSin3; AltName: Full=Transcriptional corepressor Sin3;	A0A1V9YBI0_9STRA, SubName: Full=Paired amphipathic helix protein Sin3 {ECO:0000313|EMBL:OQR83049.1};
TRINITY_DN101385_c0_g2	0	0.371	0.535	0.952	0	0	--	--	--	--	--	--
TRINITY_DN101386_c0_g1	0.02	0.15	0	0.028	0.165	0	--	--	--	--	--	--
TRINITY_DN101387_c0_g1	0.995	0	0	0	0	0	--	--	--	--	--	--
TRINITY_DN101388_c0_g1	0	0.04	0	0.283	0.103	0.173	GO:0016021,integral component of membrane; GO:0005886,plasma membrane; GO:0005524,ATP binding; GO:0004674,protein serine/threonine kinase activity; GO:0042742,defense response to bacterium; GO:0006468,protein phosphorylation	K04733: IRAK4; interleukin-1 receptor-associated kinase 4 [EC:2.7.11.1]	At4g23180	ref|XP_020176612.1|	CRK10_ARATH, RecName: Full=Cysteine-rich receptor-like protein kinase 10; Short=Cysteine-rich RLK10; EC=2.7.11.-; AltName: Full=Receptor-like protein kinase 4; Flags: Precursor;	A0A1D6AU05_WHEAT, SubName: Full=Uncharacterized protein {ECO:0000313|EnsemblPlants:TRIAE_CS42_6BL_TGACv1_502650_AA1625940.1};
TRINITY_DN101389_c0_g1	0	0	0	0.179	0.041	0.058	GO:0005737,cytoplasm; GO:0005730,nucleolus; GO:0005634,nucleus; GO:0005886,plasma membrane; GO:0005525,GTP binding; GO:0003924,GTPase activity; GO:0000902,cell morphogenesis; GO:0000226,microtubule cytoskeleton organization; GO:0009860,pollen tube growth; GO:0010119,regulation of stomatal movement; GO:0009416,response to light stimulus; GO:0007264,small GTPase mediated signal transduction	K07897: RAB7A; Ras-related protein Rab-7A	SPAC17H9.09c	gb|POF16300.1|	RAC4_ARATH, RecName: Full=Rac-like GTP-binding protein ARAC4; AltName: Full=GTPase protein ROP2; Flags: Precursor;	A0A1D1ZHJ8_9ARAE, SubName: Full=Ras-like protein {ECO:0000313|EMBL:JAT66348.1};
TRINITY_DN101389_c0_g2	0	0	0	0	0	0	--	--	--	--	--	--
TRINITY_DN10138_c0_g1	0.388	0	0	0	0	0	--	--	--	--	--	--
TRINITY_DN101390_c0_g1	0.338	0	0	0	0	0	GO:0005737,cytoplasm; GO:0005730,nucleolus; GO:0005634,nucleus; GO:0005886,plasma membrane; GO:0030427,site of polarized growth; GO:0005819,spindle; GO:0019003,GDP binding; GO:0005525,GTP binding; GO:0003924,GTPase activity; GO:0009734,auxin-activated signaling pathway; GO:0009958,positive gravitropism; GO:0010928,regulation of auxin mediated signaling pathway; GO:0007264,small GTPase mediated si…	K04392: RAC1; Ras-related C3 botulinum toxin substrate 1	At4g35020	ref|XP_022683865.1|	RAC3_ARATH, RecName: Full=Rac-like GTP-binding protein ARAC3; AltName: Full=GTPase protein ROP6; Flags: Precursor;	A5AP72_VITVI, SubName: Full=Uncharacterized protein {ECO:0000313|EMBL:CAN73627.1};
TRINITY_DN101390_c1_g1	0.487	0	0	0	0	0	--	--	--	--	--	--
TRINITY_DN101391_c0_g1	0	1.133	0	0	0	0	--	--	--	--	--	--
TRINITY_DN101391_c0_g2	0.139	0	0.707	0.16	0	0	--	K13457: RPM1, RPS3; disease resistance protein RPM1	--	dbj|GAV76335.1|	--	A0A1Q3C7T8_CEPFO, SubName: Full=Uncharacterized protein {ECO:0000313|EMBL:GAV76335.1};
TRINITY_DN101392_c0_g1	0.696	0	0	0	0	0	GO:0005829,cytosol; GO:0000166,nucleotide binding; GO:0006777,Mo-molybdopterin cofactor biosynthetic process	K21232: MOCS2A, CNXG; molybdopterin synthase sulfur carrier subunit	At4g10100	ref|XP_020110552.1|	MOC2A_MAIZE, RecName: Full=Molybdopterin synthase sulfur carrier subunit {ECO:0000255|HAMAP-Rule:MF_03051}; AltName: Full=Molybdenum cofactor synthesis protein 2 small subunit {ECO:0000255|HAMAP-Rule:MF_03051}; AltName: Full=Molybdenum cofactor synthesis protein 2A {ECO:0000255|HAMAP-Rule:MF_03051}; Short=MOCS2A {ECO:0000255|HAMAP-Rule:MF_03051}; AltName: Full=Protein viviparous15; AltName: Full=…	M0TUM0_MUSAM, RecName: Full=Molybdopterin synthase sulfur carrier subunit {ECO:0000256|HAMAP-Rule:MF_03051}; AltName: Full=Molybdenum cofactor synthesis protein 2 small subunit {ECO:0000256|HAMAP-Rule:MF_03051}; AltName: Full=Molybdenum cofactor synthesis protein 2A {ECO:0000256|HAMAP-Rule:MF_03051}; Short=MOCS2A {ECO:0000256|HAMAP-Rule:MF_03051}; AltName: Full=Sulfur carrier protein MOCS2A {ECO:…
TRINITY_DN101393_c0_g1	0	0	0	0	0	0	--	--	--	--	--	--
TRINITY_DN101394_c0_g1	0.328	0	0	0	0	0	--	--	--	--	--	--
TRINITY_DN101395_c0_g1	0	0	0	3.28	1.696	0	--	--	--	--	--	--
TRINITY_DN101396_c0_g1	0.448	0.1	0.161	0.273	0.352	0.279	GO:0005829,cytosol; GO:0051539,4 iron, 4 sulfur cluster binding; GO:0005524,ATP binding; GO:0051536,iron-sulfur cluster binding; GO:0046872,metal ion binding; GO:0042803,protein homodimerization activity; GO:0016226,iron-sulfur cluster assembly	K03593: mrp, NUBPL; ATP-binding protein involved in chromosome partitioning	At5g50960	gb|POE72192.1|	NBP35_ARATH, RecName: Full=Cytosolic Fe-S cluster assembly factor NBP35 {ECO:0000255|HAMAP-Rule:MF_03038}; AltName: Full=Nucleotide binding protein 35; Short=AtNBP35;	D7MQV3_ARALL, RecName: Full=Cytosolic Fe-S cluster assembly factor NBP35 {ECO:0000256|HAMAP-Rule:MF_03038};
TRINITY_DN101396_c0_g2	0.159	0.08	0	0.311	0.341	0.183	GO:0005829,cytosol; GO:0051539,4 iron, 4 sulfur cluster binding; GO:0005524,ATP binding; GO:0051536,iron-sulfur cluster binding; GO:0046872,metal ion binding; GO:0042803,protein homodimerization activity; GO:0016226,iron-sulfur cluster assembly	K03593: mrp, NUBPL; ATP-binding protein involved in chromosome partitioning	YGL091c	gb|POF05356.1|	NBP35_ARATH, RecName: Full=Cytosolic Fe-S cluster assembly factor NBP35 {ECO:0000255|HAMAP-Rule:MF_03038}; AltName: Full=Nucleotide binding protein 35; Short=AtNBP35;	A0A1D1YN13_9ARAE, RecName: Full=Cytosolic Fe-S cluster assembly factor NBP35 {ECO:0000256|HAMAP-Rule:MF_03038};
TRINITY_DN101398_c0_g1	0	0	0	0	0	0	--	--	--	--	--	--
TRINITY_DN101399_c0_g1	0	0	0	0	0	0.586	--	--	--	--	--	--
TRINITY_DN10139_c0_g1	0.438	0	0	0	0.962	0	--	--	--	--	--	--
TRINITY_DN101401_c0_g1	0.08	0.06	0.161	0.773	0.331	0.154	--	--	--	--	--	--
TRINITY_DN101402_c0_g1	0.487	0	0	0	0	0	--	--	At4g11800	gb|ONM20941.1|	--	A0A0A9N176_ARUDO, SubName: Full=Uncharacterized protein {ECO:0000313|EMBL:JAF00319.1};
TRINITY_DN101403_c0_g1	0.209	0.211	0	0	0	0	--	--	--	--	--	--
TRINITY_DN101404_c0_g1	0.468	0	0	0	0.672	0	--	--	--	--	--	--
TRINITY_DN101405_c0_g1	0	0.221	0	0.16	0.062	0.211	--	--	--	gb|POF04173.1|	--	--
TRINITY_DN101406_c0_g1	1.064	0	0	0	0	0	--	--	--	--	--	--
TRINITY_DN101406_c0_g2	0	0	0	0	0	0	--	--	--	--	--	--
TRINITY_DN101408_c0_g1	0.726	0.13	0.139	0.226	0.031	0.058	--	--	--	ref|XP_014660887.1|	--	K3YJR6_SETIT, SubName: Full=Uncharacterized protein {ECO:0000313|EMBL:KQL00911.1, ECO:0000313|EnsemblPlants:Si014485m};
TRINITY_DN101410_c0_g1	0.119	0.14	0.161	0.094	0.093	0.048	--	--	--	--	--	--
TRINITY_DN101411_c0_g1	0.189	0	0	0	0	0.096	--	--	--	--	--	--
TRINITY_DN101412_c0_g1	0.428	0	0	0	0	0	GO:0005737,cytoplasm; GO:0000151,ubiquitin ligase complex; GO:0061630,ubiquitin protein ligase activity; GO:0004842,ubiquitin-protein transferase activity; GO:0008270,zinc ion binding; GO:0050994,regulation of lipid catabolic process; GO:0010029,regulation of seed germination; GO:0009737,response to abscisic acid; GO:0006511,ubiquitin-dependent protein catabolic process; GO:0071596,ubiquitin-depe…	--	At5g02310	ref|NP_001131381.1|	PRT6_ARATH, RecName: Full=E3 ubiquitin-protein ligase PRT6 {ECO:0000305}; EC=2.3.2.27; AltName: Full=Protein PROTEOLYSIS 6 {ECO:0000303|PubMed:17572409}; AltName: Full=RING-type E3 ubiquitin transferase PRT6 {ECO:0000305};	B4FCC9_MAIZE, SubName: Full=Uncharacterized protein {ECO:0000313|EMBL:ACF79772.1};
TRINITY_DN101414_c0_g1	0	0	0	0	0	0	--	--	--	--	--	--
TRINITY_DN101415_c0_g1	0	0	0	0	0.165	0.855	--	K14847: RPF2; ribosome production factor 2	YKR081c	gb|POF26135.1|	--	M4C4L8_HYAAE, SubName: Full=Uncharacterized protein {ECO:0000313|EnsemblProtists:HpaP814036};
TRINITY_DN101416_c0_g1	0.09	0.07	0	0.047	0.041	0.086	--	--	--	--	--	--
TRINITY_DN101417_c0_g1	0	0	0.289	0	0.103	0	--	--	--	--	--	--
TRINITY_DN101418_c0_g1	0.507	0	0	0	0	0	--	--	At1g64140	ref|XP_008778495.1|	--	A0A2H3X561_PHODC, SubName: Full=uncharacterized protein LOC103698281 {ECO:0000313|RefSeq:XP_008778495.1, ECO:0000313|RefSeq:XP_008778496.1, ECO:0000313|RefSeq:XP_008778497.1};
TRINITY_DN101419_c0_g1	0	0.311	0	0	0.321	0	--	--	--	--	--	--
TRINITY_DN101420_c0_g1	0	0	0	0.349	0.3	0.355	--	--	--	--	--	--
TRINITY_DN101421_c0_g1	0	0	0	0.396	0.165	0	--	--	--	--	--	--
TRINITY_DN101422_c0_g1	0	0	0	0	3.298	0	--	--	--	--	--	--
TRINITY_DN101423_c1_g1	0.507	0	0	0	0	0	--	--	--	--	--	--
TRINITY_DN101425_c0_g1	0	0	0	0	1.861	0	--	--	--	--	--	--
TRINITY_DN101425_c1_g1	0	0	0	0	0.414	0	--	--	--	--	--	--
TRINITY_DN101426_c0_g1	0	0	0	0	0	1.124	--	--	--	--	--	--
TRINITY_DN101427_c0_g1	0	0	0	0	0	0	--	--	--	--	--	--
TRINITY_DN101428_c0_g1	0	0.511	0	0	0	0	--	--	--	--	--	--
TRINITY_DN101429_c0_g1	0	0	0	0	0	0	--	--	--	--	--	--
TRINITY_DN101430_c0_g1	0.269	0	0	0	0	0	GO:0009501,amyloplast; GO:0009507,chloroplast; GO:0033201,alpha-1,4-glucan synthase activity; GO:0004373,glycogen (starch) synthase activity; GO:0009011,starch synthase activity; GO:0019252,starch biosynthetic process	K00703: glgA; starch synthase [EC:2.4.1.21]	At3g01180	emb|CDY43274.1|	SSY21_ORYSJ, RecName: Full=Soluble starch synthase 2-1, chloroplastic/amyloplastic; EC=2.4.1.21; AltName: Full=Soluble starch synthase II-1; Flags: Precursor;	A0A078I103_BRANA, RecName: Full=Starch synthase, chloroplastic/amyloplastic {ECO:0000256|RuleBase:RU361232}; EC=2.4.1.- {ECO:0000256|RuleBase:RU361232};
TRINITY_DN101432_c0_g1	0	0	0	0.499	0	0.394	--	K07195: EXOC7, EXO70; exocyst complex component 7	--	gb|EAZ00397.1|	--	A0A1D5UH98_WHEAT, SubName: Full=Uncharacterized protein {ECO:0000313|EnsemblPlants:TRIAE_CS42_2DL_TGACv1_158074_AA0508050.2};
TRINITY_DN101433_c0_g1	0.219	0	0	0	0	0	GO:0005777,peroxisome; GO:0016874,ligase activity; GO:0006631,fatty acid metabolic process	K15164: MED13; mediator of RNA polymerase II transcription subunit 13	At1g55320	ref|XP_020090054.1|	AAE17_ARATH, RecName: Full=Probable acyl-activating enzyme 17, peroxisomal; EC=6.2.1.-;	A0A2H3XD51_PHODC, SubName: Full=probable acyl-activating enzyme 17, peroxisomal {ECO:0000313|RefSeq:XP_008782050.1};
TRINITY_DN101435_c0_g1	0.865	0	0	0.481	0.393	0	--	--	--	--	--	--
TRINITY_DN101436_c0_g1	0	0	0	0.49	0	0	--	--	--	--	--	--
TRINITY_DN101437_c0_g1	0	0.05	0.161	0	0	0.259	--	--	--	--	--	--
TRINITY_DN101438_c0_g1	0.09	0.01	0.021	0.075	0.155	0.134	GO:0005789,endoplasmic reticulum membrane; GO:0016021,integral component of membrane; GO:0005886,plasma membrane; GO:0009884,cytokinin receptor activity; GO:0042802,identical protein binding; GO:0019900,kinase binding; GO:0000155,phosphorelay sensor kinase activity; GO:0004673,protein histidine kinase activity; GO:0043424,protein histidine kinase binding; GO:0071215,cellular response to abscisic …	--	At2g01830	gb|POE48330.1|	AHK2_ARATH, RecName: Full=Histidine kinase 2; EC=2.7.13.3; AltName: Full=Arabidopsis histidine kinase 2; Short=AtHK2; AltName: Full=Protein AUTHENTIC HIS-KINASE 2;	D8SMU2_SELML, SubName: Full=Uncharacterized protein {ECO:0000313|EMBL:EFJ14241.1};
TRINITY_DN101439_c0_g1	0.07	0	0	0	0.186	0.355	--	--	SPAC17C9.03	gb|POF18508.1|	--	A0A1D1ZI63_9ARAE, SubName: Full=Eukaryotic translation initiation factor 4 gamma {ECO:0000313|EMBL:JAT66656.1}; Flags: Fragment;
TRINITY_DN10143_c0_g1	1.562	0	0	0	0	0	--	--	--	--	--	--
TRINITY_DN101440_c0_g1	1.731	0	0	0	0	0	GO:0043531,ADP binding; GO:0005524,ATP binding; GO:0006952,defense response	--	--	emb|CAP66278.1|	RGA3_SOLBU, RecName: Full=Putative disease resistance protein RGA3; AltName: Full=Blight resistance protein B149; AltName: Full=RGA1-blb;	B0JEH9_MUSBA, SubName: Full=NBS-LRR disease resistance protein {ECO:0000313|EMBL:CAP66278.1}; Flags: Fragment;
TRINITY_DN101441_c0_g1	0.487	0.08	0	0	0.093	0	--	--	--	--	--	--
TRINITY_DN101442_c0_g1	0.816	0	0	0	0	0	--	--	--	--	--	--
TRINITY_DN101444_c0_g1	0	0.261	0.193	0	0.145	0	--	--	--	--	--	--
TRINITY_DN101446_c0_g1	0	0	0	0	0.341	0	--	--	--	gb|POF17996.1|	--	--
TRINITY_DN101447_c0_g1	0.836	0.431	0	0	0	0	--	K13459: RPS2; disease resistance protein RPS2	--	gb|PAN48110.1|	--	A0A0A9MB80_ARUDO, SubName: Full=Uncharacterized protein {ECO:0000313|EMBL:JAE94134.1};
TRINITY_DN101448_c0_g1	0	0.181	0	0.047	0.041	0	GO:0005737,cytoplasm; GO:0005654,nucleoplasm; GO:0005634,nucleus; GO:0005200,structural constituent of cytoskeleton; GO:0030029,actin filament-based process; GO:0006281,DNA repair; GO:0007275,multicellular organism development; GO:0080036,regulation of cytokinin-activated signaling pathway; GO:0010082,regulation of root meristem growth	K11672: ACTR5, ARP5, INO80M; actin-related protein 5	SPBC365.10	dbj|BAK03122.1|	ARP5_ARATH, RecName: Full=Actin-related protein 5;	F2E700_HORVV, SubName: Full=Predicted protein {ECO:0000313|EMBL:BAK03122.1};
TRINITY_DN101448_c0_g2	0.09	0	0	0	0	0.192	--	--	YNL059c	dbj|BAK03122.1|	--	F2E700_HORVV, SubName: Full=Predicted protein {ECO:0000313|EMBL:BAK03122.1};
TRINITY_DN101449_c0_g1	0.836	0	0	0	0	0	--	--	--	--	--	--
TRINITY_DN10144_c0_g1	2.895	0	0	0	0.9	0	--	--	--	--	--	--
TRINITY_DN101450_c0_g1	1.025	0	0	0	0.321	0	--	--	--	--	--	--
TRINITY_DN101450_c1_g1	1.631	0	0	0	0	0	--	--	--	--	--	--
TRINITY_DN101451_c0_g1	1.015	0	0	0	0	0	--	--	--	--	--	--
TRINITY_DN101451_c1_g1	0.219	0	0	0	0	0	--	--	--	--	--	--
TRINITY_DN101452_c0_g1	0.269	0.221	0	0	0.176	0	--	--	--	--	--	--
TRINITY_DN101453_c0_g1	0	0	0	0	0	0	--	--	--	--	--	--
TRINITY_DN101454_c0_g1	0	0	0	0	0	0	--	--	--	--	--	--
TRINITY_DN101455_c0_g1	0	0	4.348	0	0	0	--	--	--	--	--	--
TRINITY_DN101455_c0_g2	0	0	0	0	1.23	0	--	--	--	--	--	--
TRINITY_DN101456_c0_g1	0.477	0	0	0	0	0	GO:0005829,cytosol; GO:0005634,nucleus; GO:0017172,cysteine dioxygenase activity; GO:0046872,metal ion binding; GO:0070483,detection of hypoxia; GO:0018171,peptidyl-cysteine oxidation; GO:0001666,response to hypoxia	K10712: ADO; cysteamine dioxygenase [EC:1.13.11.19]	At5g39890	ref|XP_020082804.1|	PCO2_ARATH, RecName: Full=Plant cysteine oxidase 2 {ECO:0000303|PubMed:24599061}; EC=1.13.11.20;	A0A199VM06_ANACO, SubName: Full=Plant cysteine oxidase 2 {ECO:0000313|EMBL:OAY77760.1};
TRINITY_DN101457_c0_g1	0	0	0	0.057	0	0	--	--	--	--	--	--
TRINITY_DN101457_c0_g2	2.238	0	0	0	0	0	--	--	--	--	--	--
TRINITY_DN101458_c0_g1	0	0.08	0	0	0.176	0	--	--	--	--	--	--
TRINITY_DN101459_c0_g1	0	0	0.096	0	0.217	0.317	--	--	--	gb|POE47268.1|	--	--
TRINITY_DN101460_c0_g1	0.716	0	0	0	0	0.384	--	--	--	--	--	--
TRINITY_DN101461_c0_g1	0	2.286	0	0	0	0.74	--	--	--	--	--	--
TRINITY_DN101462_c0_g1	0	0.371	0	0.443	0.124	0.596	--	--	--	--	--	--
TRINITY_DN101463_c0_g1	0.119	0.14	0	0	0.114	0	GO:0005783,endoplasmic reticulum; GO:0005789,endoplasmic reticulum membrane; GO:0016021,integral component of membrane; GO:0030170,pyridoxal phosphate binding; GO:0004758,serine C-palmitoyltransferase activity; GO:0009793,embryo development ending in seed dormancy; GO:0009825,multidimensional cell growth; GO:0043067,regulation of programmed cell death; GO:0030148,sphingolipid biosynthetic process	K00654: SPT; serine palmitoyltransferase [EC:2.3.1.50]	SPBC18E5.02c	gb|POE48833.1|	LCB1_ARATH, RecName: Full=Long chain base biosynthesis protein 1; Short=AtLCB1; EC=2.3.1.50; AltName: Full=Protein EMBRYO DEFECTIVE 2779; AltName: Full=Protein FUMONISIN B1 RESISTANT 11;	G4Z5K7_PHYSP, SubName: Full=Uncharacterized protein {ECO:0000313|EMBL:EGZ21685.1};
TRINITY_DN101464_c0_g1	0.239	0	0	0	0	0	--	K22184: BRD9; bromodomain-containing protein 9	--	ref|XP_010929662.1|	--	A0A2H3Z4X1_PHODC, SubName: Full=uncharacterized protein LOC103720485 isoform X3 {ECO:0000313|RefSeq:XP_008808423.1};
TRINITY_DN101465_c0_g1	0.04	0.191	0.075	0.009	0.114	0.048	--	--	--	--	--	--
TRINITY_DN101466_c0_g1	0.557	0	0	0	0	0	--	--	--	--	--	--
TRINITY_DN101467_c0_g1	0	0	0	0	0	0	--	--	--	--	--	--
TRINITY_DN101467_c0_g2	0.318	0	0.086	0	0.062	0	GO:0005783,endoplasmic reticulum; GO:0005794,Golgi apparatus; GO:0016020,membrane; GO:0009506,plasmodesma; GO:0009536,plastid; GO:0005773,vacuole; GO:0004028,3-chloroallyl aldehyde dehydrogenase activity; GO:0004029,aldehyde dehydrogenase (NAD) activity; GO:0004030,aldehyde dehydrogenase [NAD(P)+] activity; GO:0006081,cellular aldehyde metabolic process; GO:0009737,response to abscisic acid; GO:0…	K00128: ALDH; aldehyde dehydrogenase (NAD+) [EC:1.2.1.3]	7304212	dbj|GAQ82469.1|	AL3H1_ARATH, RecName: Full=Aldehyde dehydrogenase family 3 member H1; Short=AtALDH4; Short=Ath-ALDH4; EC=1.2.1.3;	A0A1Y1HZ48_KLENI, RecName: Full=Aldehyde dehydrogenase {ECO:0000256|PIRNR:PIRNR036492};
TRINITY_DN101468_c0_g1	0.05	0.01	0	0.028	0.176	0.086	--	--	--	gb|POE62990.1|	--	--
TRINITY_DN101469_c0_g1	0	0	0	0	0.507	0	--	--	--	--	--	--
TRINITY_DN10146_c0_g1	0	0	0	0	2.616	1.095	--	--	--	--	--	--
TRINITY_DN101470_c0_g1	0.269	0	0	0	0	0	--	--	7299711	ref|XP_022634317.1|	--	--
TRINITY_DN101471_c1_g1	0	0	0	0.104	0.083	0.538	--	--	--	--	--	--
TRINITY_DN101472_c0_g1	0	0.431	0.214	0	0	0	--	--	--	--	--	--
TRINITY_DN101474_c0_g1	0	0	0	0	0	0	--	--	--	--	--	--
TRINITY_DN101475_c0_g1	0	0.05	0.075	0	0.062	0.125	--	--	--	--	--	--
TRINITY_DN101476_c0_g1	0	0	0	0	0	0	--	--	--	--	--	--
TRINITY_DN101479_c0_g1	0.477	0	0	0	0	0	--	--	--	--	--	--
TRINITY_DN101480_c0_g1	0.08	0.13	0	0	0.083	0.336	GO:0009507,chloroplast; GO:0009570,chloroplast stroma; GO:0009536,plastid; GO:0004648,O-phospho-L-serine:2-oxoglutarate aminotransferase activity; GO:0006564,L-serine biosynthetic process; GO:0009735,response to cytokinin	K00831: serC, PSAT1; phosphoserine aminotransferase [EC:2.6.1.52]	7301762	dbj|GAQ81600.1|	SERB1_ARATH, RecName: Full=Phosphoserine aminotransferase 1, chloroplastic; Short=AtPSAT1; EC=2.6.1.52; AltName: Full=Phosphohydroxythreonine aminotransferase; Flags: Precursor;	A0A1Q9EJ86_SYMMI, SubName: Full=Phosphoserine aminotransferase {ECO:0000313|EMBL:OLQ07516.1};
TRINITY_DN101481_c0_g1	0	0.03	0.064	0.198	0.103	0.125	GO:0005739,mitochondrion	K22804: SMC6; structural maintenance of chromosomes protein 6	At1g24640	gb|EMS67416.1|	M310_ARATH, RecName: Full=Uncharacterized mitochondrial protein AtMg00310; AltName: Full=ORF154;	M8A5W8_TRIUA, SubName: Full=Protein argonaute 1D {ECO:0000313|EMBL:EMS67416.1, ECO:0000313|EnsemblPlants:TRIUR3_33419-P1};
TRINITY_DN101483_c1_g1	0.865	0	0	0.518	0	0	--	--	--	--	--	--
TRINITY_DN101484_c0_g1	0	0	0	0.16	0	0	--	--	--	gb|POF16486.1|	--	--
TRINITY_DN101485_c0_g1	0	0	0	0.735	0	0	--	--	--	--	--	--
TRINITY_DN101486_c1_g1	0	0	0.975	0	0.352	0	--	--	--	--	--	--
TRINITY_DN101487_c0_g1	0	0	0	0	0	0	--	--	--	--	--	--
TRINITY_DN101488_c0_g1	0.358	0	0	0	0	0	--	--	--	ref|XP_020112583.1|	--	A0A199VEY1_ANACO, SubName: Full=Uncharacterized protein {ECO:0000313|EMBL:OAY75672.1};
TRINITY_DN101489_c0_g1	0	0	0	0	0	0.672	--	--	--	--	--	--
TRINITY_DN101491_c0_g1	0.02	0.421	0.182	0	0	0	--	K22698: SEY1; protein SEY1 [EC:3.6.5.-]	YOR165w	gb|POE53319.1|	--	R7QG26_CHOCR, RecName: Full=Protein SEY1 homolog {ECO:0000256|HAMAP-Rule:MF_03109}; EC=3.6.5.- {ECO:0000256|HAMAP-Rule:MF_03109};
TRINITY_DN101492_c0_g1	0.199	0.04	0	0.188	0.321	0.115	--	--	--	--	--	--
TRINITY_DN101492_c0_g2	0.129	0.05	0.064	0.123	0	0	--	--	--	--	--	--
TRINITY_DN101493_c0_g1	0	0.191	0	0	0	0.48	--	--	--	--	--	--
TRINITY_DN101493_c1_g1	1.671	0	0	0	0	0	--	--	--	--	--	--
TRINITY_DN101494_c0_g1	0	0.11	0	0	0.124	0.134	--	--	--	--	--	--
TRINITY_DN101496_c0_g1	1.89	0	0	0	0	0	--	--	--	--	--	--
TRINITY_DN101496_c0_g2	1.074	0	0	0	0	0	--	K14774: UTP25, DEF; U3 small nucleolar RNA-associated protein 25	SPCC1827.01c	emb|CDP16107.1|	--	A0A068V6B3_COFCA, SubName: Full=Uncharacterized protein {ECO:0000313|EMBL:CDP16107.1};
TRINITY_DN101498_c0_g1	0	0	0	0	0	0	--	--	--	--	--	--
TRINITY_DN101499_c0_g1	0.587	0	0	0	0	0	--	--	--	--	--	--
TRINITY_DN10149_c0_g1	0	0.03	0.15	0	0.196	0.173	--	--	--	--	--	--
TRINITY_DN101500_c0_g1	0	0	0	0	0	0	--	--	--	--	--	--
TRINITY_DN101500_c1_g1	0	0	0	0	0.869	0	--	--	--	--	--	--
TRINITY_DN101501_c0_g1	0	0	0	0	1.541	2.498	--	--	--	--	--	--
TRINITY_DN101502_c0_g1	0	1.765	0	0	0	0	--	--	--	--	--	--
TRINITY_DN101503_c0_g1	0.318	0	0	0	0	0	--	--	--	--	--	--
TRINITY_DN101505_c0_g1	0	0.08	0	0.057	0.052	0.058	--	--	--	--	--	--
TRINITY_DN101507_c0_g1	0	0	0	0	0.455	0	--	--	--	--	--	--
TRINITY_DN101508_c0_g1	0	0.09	0	0	0.321	1.143	GO:0005618,cell wall; GO:0009507,chloroplast; GO:0005829,cytosol; GO:0009516,leucoplast; GO:0008802,betaine-aldehyde dehydrogenase activity; GO:0019285,glycine betaine biosynthetic process from choline; GO:0009651,response to salt stress; GO:0009414,response to water deprivation	K00128: ALDH; aldehyde dehydrogenase (NAD+) [EC:1.2.1.3]	CE07233	gb|POE71945.1|	BADH1_ARATH, RecName: Full=Betaine aldehyde dehydrogenase 1, chloroplastic; Short=BADH; EC=1.2.1.8; AltName: Full=Aldehyde dehydrogenase family 10 member A8; Flags: Precursor;	K3WB79_PYTUL, SubName: Full=Uncharacterized protein {ECO:0000313|EnsemblProtists:PYU1_T002220};
TRINITY_DN101509_c0_g1	0	0	0	0	0.982	0	--	--	--	--	--	--
TRINITY_DN101510_c0_g1	0	0	0.343	0.311	0	0.134	--	--	--	--	--	--
TRINITY_DN101511_c0_g1	0.398	0.11	0.107	0.123	0.269	0.288	--	--	--	--	--	--
TRINITY_DN101512_c0_g1	0	0.11	0.257	0	0	0	--	--	--	gb|EMS68417.1|	--	A0A1D5RWK9_WHEAT, SubName: Full=Uncharacterized protein {ECO:0000313|EnsemblPlants:TRIAE_CS42_1AL_TGACv1_001940_AA0037010.5};
TRINITY_DN101515_c0_g1	0	0	0	0	1.52	0	--	--	--	--	--	--
TRINITY_DN101516_c0_g1	0.149	0	0	0	0	0	--	--	--	gb|OQU83291.1|	--	A0A1Z5RIC8_SORBI, SubName: Full=Uncharacterized protein {ECO:0000313|EMBL:OQU83291.1};
TRINITY_DN101518_c0_g1	0.468	0	0	0	0.879	0	--	--	--	--	--	--
TRINITY_DN101519_c0_g1	0.109	0.04	0.086	0.179	0	0.106	--	--	--	--	--	--
TRINITY_DN10151_c0_g1	0.448	0	0	0	0	0	GO:0009706,chloroplast inner membrane; GO:0016021,integral component of membrane; GO:0015992,NA	K02634: petA; apocytochrome f	AtCh035	ref|XP_020109555.1|	CEMA_NEPOL, RecName: Full=Chloroplast envelope membrane protein;	A0A199UJZ5_ANACO, SubName: Full=Chloroplast envelope membrane protein {ECO:0000313|EMBL:OAY65207.1};
TRINITY_DN101520_c0_g1	0.03	0.05	0.086	0.198	0.062	0.173	--	--	--	--	--	--
TRINITY_DN101521_c0_g1	0.348	0.612	0	0	0	0.567	--	--	--	--	--	--
TRINITY_DN101522_c0_g1	0	0	0.161	0	0.227	0.154	--	--	--	--	--	--
TRINITY_DN101522_c0_g2	0	0.05	0.032	0.17	0.062	0.077	--	--	--	--	--	--
TRINITY_DN101523_c0_g1	0.279	0.08	0	0.198	0.176	0.096	--	--	--	--	--	--
TRINITY_DN101524_c0_g1	0.259	0.261	0.021	0.047	0.155	0	GO:0005578,proteinaceous extracellular matrix; GO:0046556,alpha-L-arabinofuranosidase activity; GO:0009044,xylan 1,4-beta-xylosidase activity; GO:0045493,xylan catabolic process	K15920: XYL4; xylan 1,4-beta-xylosidase [EC:3.2.1.37]	At5g64570	dbj|BAJ89945.1|	XYL2_MEDSV, RecName: Full=Beta-xylosidase/alpha-L-arabinofuranosidase 2 {ECO:0000303|PubMed:17615411, ECO:0000312|EMBL:ABQ45228.1}; AltName: Full=Xylan 1,4-beta-xylosidase/Alpha-L-arabinofuranosidase 2; Short=MsXyl2 {ECO:0000303|PubMed:17615411}; Includes: RecName: Full=Beta-xylosidase; EC=3.2.1.37; AltName: Full=1,4-beta-D-xylan xylohydrolase {ECO:0000250|UniProtKB:P48792}; AltName: Full=Xylan 1…	F2D4C4_HORVV, SubName: Full=Predicted protein {ECO:0000313|EMBL:BAJ89945.1};
TRINITY_DN101526_c0_g1	0	0	0	0	0	0	--	--	--	--	--	--
TRINITY_DN101527_c0_g1	0	0	0	0	0.744	0.442	--	--	--	--	--	--
TRINITY_DN101528_c0_g1	0.269	0	0	0	0	0	--	--	--	ref|XP_020095758.1|	--	A0A199UV49_ANACO, SubName: Full=Uncharacterized protein {ECO:0000313|EMBL:OAY68629.1};
TRINITY_DN101529_c0_g1	0	0.542	0	0	0	0	--	--	--	--	--	--
TRINITY_DN10152_c0_g1	1.472	0	0	0	0	0	--	--	--	--	--	--
TRINITY_DN101530_c0_g1	0.428	0.06	0	0	0.207	0	GO:0016798,hydrolase activity, acting on glycosyl bonds; GO:0004553,hydrolase activity, hydrolyzing O-glycosyl compounds; GO:0005975,carbohydrate metabolic process	K15920: XYL4; xylan 1,4-beta-xylosidase [EC:3.2.1.37]	At5g49360	gb|POF17297.1|	XYNB_PRUPE, RecName: Full=Putative beta-D-xylosidase; EC=3.2.1.-; AltName: Full=PpAz152; Flags: Fragment;	A0A199UCF1_ANACO, SubName: Full=Beta-xylosidase/alpha-L-arabinofuranosidase 2 {ECO:0000313|EMBL:OAY62547.1};
TRINITY_DN101531_c0_g1	0	0.371	0	0.245	0	0.682	--	--	--	--	--	--
TRINITY_DN101532_c1_g1	1.452	0	0	0	0	0	--	--	--	--	--	--
TRINITY_DN101533_c0_g1	0.537	0	0.439	0	0	0	GO:0005743,mitochondrial inner membrane; GO:0005739,mitochondrion; GO:0045273,respiratory chain complex II; GO:0045281,succinate dehydrogenase complex; GO:0051537,2 iron, 2 sulfur cluster binding; GO:0051538,3 iron, 4 sulfur cluster binding; GO:0051539,4 iron, 4 sulfur cluster binding; GO:0009055,electron transfer activity; GO:0008177,succinate dehydrogenase (ubiquinone) activity; GO:0000104,succ…	K00235: SDHB, SDH2; succinate dehydrogenase (ubiquinone) iron-sulfur subunit [EC:1.3.5.1]	7302306	gb|POE63378.1|	SDHB1_ARATH, RecName: Full=Succinate dehydrogenase [ubiquinone] iron-sulfur subunit 1, mitochondrial; EC=1.3.5.1; AltName: Full=Iron-sulfur subunit of complex II; Short=Ip; Flags: Precursor;	A0A1Z5JTM5_FISSO, RecName: Full=Succinate dehydrogenase [ubiquinone] iron-sulfur subunit, mitochondrial {ECO:0000256|RuleBase:RU361237}; EC=1.3.5.1 {ECO:0000256|RuleBase:RU361237};
TRINITY_DN101535_c0_g1	0.269	0.531	0	0.17	0.031	0.125	GO:0005634,nucleus; GO:0046872,metal ion binding	K13102: KIN; DNA/RNA-binding protein KIN17	SPBC365.09c	gb|POE56686.1|	KIN17_ORYSI, RecName: Full=KIN17-like protein {ECO:0000305};	A0A1D1XY61_9ARAE, SubName: Full=DNA/RNA-binding protein KIN17 {ECO:0000313|EMBL:JAT47281.1}; Flags: Fragment;
TRINITY_DN101536_c0_g1	0.338	0.15	0	0	0	0	--	--	--	--	--	--
TRINITY_DN101538_c0_g1	3.621	0	0	0	0	0	--	--	--	--	--	--
TRINITY_DN10153_c0_g1	0	0	0.696	0	0	0	--	--	--	--	--	--
TRINITY_DN101541_c0_g1	0.676	0	0	0	0	0	--	--	At4g17330_2	ref|XP_020156313.1|	--	A0A1D5RZ22_WHEAT, SubName: Full=Uncharacterized protein {ECO:0000313|EnsemblPlants:TRIAE_CS42_1AL_TGACv1_003183_AA0048520.1};
TRINITY_DN101543_c0_g1	0	0	0	0	0.269	0.298	--	--	--	--	--	--
TRINITY_DN101545_c0_g1	0	0	0	0	0	0.355	--	--	--	--	--	--
TRINITY_DN101545_c0_g2	0.04	0.09	0.021	0.151	0.196	0	--	--	--	--	--	--
TRINITY_DN101546_c0_g1	0	0	0	0.396	0	0	--	--	--	--	--	--
TRINITY_DN101546_c1_g1	0	0.17	0	0	0.362	0.202	--	--	--	--	--	--
TRINITY_DN101547_c0_g1	0.189	0.08	0.621	0.179	0.134	0	GO:0005737,cytoplasm; GO:0005886,plasma membrane; GO:0046914,transition metal ion binding; GO:0046916,cellular transition metal ion homeostasis; GO:0030001,metal ion transport	K10752: RBBP4, HAT2, CAF1, MIS16; histone-binding protein RBBP4	At4g38580	dbj|BAJ89496.1|	HIP27_ARATH, RecName: Full=Heavy metal-associated isoprenylated plant protein 27 {ECO:0000303|PubMed:21072340, ECO:0000303|PubMed:23368984}; Short=AtHIP27 {ECO:0000303|PubMed:23368984}; Short=AtHIPP27 {ECO:0000303|PubMed:21072340, ECO:0000303|PubMed:23368984}; Flags: Precursor;	F2D325_HORVV, SubName: Full=Predicted protein {ECO:0000313|EMBL:BAJ89496.1, ECO:0000313|EnsemblPlants:HORVU7Hr1G090970.1};
TRINITY_DN101548_c0_g1	0.189	0	0	0	0	0	--	--	--	--	--	--
TRINITY_DN101549_c0_g1	0	0	0	0	0	1.614	--	--	--	--	--	--
TRINITY_DN101551_c0_g1	0	0	0.203	0	0.258	0	--	--	--	--	--	--
TRINITY_DN101552_c0_g1	0	0	0	0	0	0.509	--	--	--	--	--	--
TRINITY_DN101553_c0_g1	0	0	0	0	0	0.038	GO:0022626,cytosolic ribosome; GO:0022627,cytosolic small ribosomal subunit; GO:0016020,membrane; GO:0003729,mRNA binding; GO:0003735,structural constituent of ribosome; GO:0006412,translation	K02976: RP-S26e, RPS26; small subunit ribosomal protein S26e	Hs15011936	ref|XP_010683522.1|	RS263_ARATH, RecName: Full=40S ribosomal protein S26-3;	A0A1D1XGW1_9ARAE, RecName: Full=40S ribosomal protein S26 {ECO:0000256|RuleBase:RU363128}; Flags: Fragment;
TRINITY_DN101554_c0_g1	1.86	0	0	0	0	0	--	--	--	--	--	--
TRINITY_DN101554_c1_g1	0.647	0	0	0	0	0	--	--	--	--	--	--
TRINITY_DN101555_c0_g1	0.706	0	0	0	0	0.778	--	K20280: TRAPPC5, TRS31; trafficking protein particle complex subunit 5	SPBC1718.05	gb|KHN07636.1|	--	A0A1D1YQM3_9ARAE, SubName: Full=Transport protein particle subunit trs31 {ECO:0000313|EMBL:JAT56931.1}; Flags: Fragment;
TRINITY_DN101556_c0_g1	0.07	0	0	0.17	0.114	0.115	--	--	--	--	--	--
TRINITY_DN101558_c0_g1	0	0	0	0.236	0.196	0	--	--	--	--	--	--
TRINITY_DN101559_c0_g1	0.139	0	0	0	0	0	--	--	--	--	--	--
TRINITY_DN10155_c0_g1	1.084	0	0	0	0	0	--	--	--	--	--	--
TRINITY_DN101560_c0_g1	0.318	0.291	0	0	0	0.355	--	--	--	--	--	--
TRINITY_DN101561_c0_g1	1.184	0	0	0	0	0	--	--	--	--	--	--
TRINITY_DN101561_c0_g2	0.766	0	0	0	0	0	--	--	--	ref|YP_009241339.1|	--	A0A140E9Y6_DRORT, RecName: Full=30S ribosomal protein S18, chloroplastic {ECO:0000256|HAMAP-Rule:MF_00270};
TRINITY_DN101562_c0_g1	0.298	0	0	0	0	0	GO:0005737,cytoplasm; GO:0005524,ATP binding; GO:0016301,kinase activity; GO:0004708,MAP kinase kinase activity; GO:0004674,protein serine/threonine kinase activity; GO:0009926,auxin polar transport; GO:0042742,defense response to bacterium; GO:0002229,defense response to oomycetes; GO:0007346,regulation of mitotic cell cycle; GO:0031098,stress-activated protein kinase signaling cascade; GO:00098…	K20604: MKK9; mitogen-activated protein kinase kinase 9 [EC:2.7.12.2]	At1g18350	ref|XP_008775718.1|	M2K7_ARATH, RecName: Full=Mitogen-activated protein kinase kinase 7; Short=AtMKK7; Short=MAP kinase kinase 7; EC=2.7.12.2; AltName: Full=Protein BUSHY AND DWARF 1;	A0A2H3WYS4_PHODC, SubName: Full=mitogen-activated protein kinase kinase 9-like {ECO:0000313|RefSeq:XP_008775718.1};
TRINITY_DN101564_c0_g1	0.298	0	0	0	0	0	GO:0048037,cofactor binding	--	At3g59300	ref|XP_019704268.1|	Y3913_ARATH, RecName: Full=Uncharacterized protein At3g49140;	A0A0D9YIP5_9ORYZ, SubName: Full=Uncharacterized protein {ECO:0000313|EnsemblPlants:OGLUM01G44800.2};
TRINITY_DN101565_c0_g1	0.03	0.1	0	0.075	0.176	0.134	GO:0005768,endosome; GO:0030897,HOPS complex; GO:0031902,late endosome membrane; GO:0009705,plant-type vacuole membrane; GO:0043234,NA; GO:0046872,metal ion binding; GO:0030674,protein binding, bridging; GO:0007032,endosome organization; GO:0006886,intracellular protein transport; GO:0007040,lysosome organization; GO:0035542,regulation of SNARE complex assembly; GO:0007033,vacuole organization; G…	K20179: VPS11, PEP5; vacuolar protein sorting-associated protein 11	Hs17978477	gb|POE71978.1|	VPS11_ARATH, RecName: Full=Vacuolar protein-sorting-associated protein 11 homolog; Short=AtVPS11;	A0A1S3CMD5_CUCME, SubName: Full=vacuolar protein-sorting-associated protein 11 homolog {ECO:0000313|RefSeq:XP_008464170.1};
TRINITY_DN101566_c0_g1	0.229	0.17	0	0.226	0.072	0.048	--	--	--	--	--	--
TRINITY_DN101567_c0_g1	0	0	0	0	0	0	--	--	--	--	--	--
TRINITY_DN101567_c0_g2	0	1.655	0	0	0	0	--	--	--	--	--	--
TRINITY_DN101567_c0_g3	0.169	0	0	0	0.165	0.269	--	--	--	--	--	--
TRINITY_DN101568_c0_g1	0.627	0	0	0	0	0	GO:0009507,chloroplast; GO:0009534,chloroplast thylakoid; GO:0009535,chloroplast thylakoid membrane; GO:0016021,integral component of membrane	--	At5g51540	ref|XP_012090413.1|	LPA2_ARATH, RecName: Full=Protein LOW PSII ACCUMULATION 2, chloroplastic; Flags: Precursor;	A0A067JS76_JATCU, SubName: Full=Uncharacterized protein {ECO:0000313|EMBL:KDP22399.1};
TRINITY_DN10156_c0_g1	0.288	0	0	0	0	0	--	--	--	--	--	--
TRINITY_DN101570_c0_g1	0	0	0	0	0	0	--	--	--	--	--	--
TRINITY_DN101572_c0_g1	0.637	0	0	0	0	0	--	--	--	--	--	A0A0K9RJM3_SPIOL, SubName: Full=Uncharacterized protein {ECO:0000313|EMBL:KNA19688.1};
TRINITY_DN101573_c0_g1	0.119	0.11	0	0	0.217	0.163	--	--	--	--	--	--
TRINITY_DN101574_c0_g1	0	0	0	0.151	0.093	0.346	--	--	--	--	--	--
TRINITY_DN101575_c0_g1	1.462	0	0	0	0	0	--	--	--	--	--	--
TRINITY_DN101576_c1_g1	0	0	0	0.104	0.083	0	--	--	--	--	--	--
TRINITY_DN101577_c0_g1	0	0.913	0	0	0.321	0.375	--	--	--	--	--	--
TRINITY_DN101578_c0_g1	0.05	0	0	0.047	0.103	0.134	--	--	--	--	--	--
TRINITY_DN101579_c0_g1	0	0.13	0	0.094	0.031	0.096	--	--	--	--	--	--
TRINITY_DN101579_c1_g1	0.09	0.07	0.043	0.085	0.083	0.048	--	--	--	--	--	--
TRINITY_DN10157_c0_g1	0	0	0.61	0	0	0	--	--	--	--	--	--
TRINITY_DN101580_c0_g1	0	0	0	0.631	0.258	0	--	--	--	--	--	--
TRINITY_DN101580_c0_g2	0	0	0	0	0	0.74	--	--	--	--	--	--
TRINITY_DN101580_c0_g3	0	0	0	0	0	1.614	--	--	--	--	--	--
TRINITY_DN101581_c0_g1	0.428	0	0	0	0	0	GO:0005829,cytosol; GO:0019003,GDP binding; GO:0005525,GTP binding; GO:0003924,GTPase activity	K06944: K06944; uncharacterized protein	At4g39520	ref|XP_010916983.1|	DRG3_ARATH, RecName: Full=Developmentally-regulated G-protein 3; Short=AtDRG3; AltName: Full=Developmentally-regulated G-protein 1; Short=AtDRG1;	A0A1J7H966_LUPAN, SubName: Full=Uncharacterized protein {ECO:0000313|EMBL:OIV96970.1};
TRINITY_DN101582_c0_g1	0.09	0	0	0	0	0.096	--	--	--	--	--	--
TRINITY_DN101584_c0_g1	0.149	0.13	0	0	0	0.154	--	--	--	--	--	--
TRINITY_DN101586_c0_g1	0	0	0	0	0.145	0.327	--	--	--	--	--	--
TRINITY_DN101588_c0_g1	0	1.163	3.031	0	0	0	--	--	--	--	--	--
TRINITY_DN101589_c0_g1	1.522	5.455	0	0	0	0	--	--	--	--	--	--
TRINITY_DN101590_c0_g1	0.08	0.12	0	0.085	0.227	0.317	--	--	--	--	--	--
TRINITY_DN101592_c0_g1	0.109	0.13	0.225	0	0	0	--	--	--	--	--	--
TRINITY_DN101592_c1_g1	0.129	0.04	0.129	0.066	0	0.058	--	--	--	--	--	--
TRINITY_DN101593_c0_g1	1.363	0	0	0	0	0	--	--	--	--	--	--
TRINITY_DN101595_c0_g1	0	0	0	1.706	0	0	--	--	--	--	--	--
TRINITY_DN101596_c0_g1	0.189	0.03	0	0.038	0.124	0.25	--	--	SPBC947.06c	gb|POF04883.1|	--	A0A150GE32_GONPE, SubName: Full=Uncharacterized protein {ECO:0000313|EMBL:KXZ48094.1};
TRINITY_DN101598_c0_g1	0	0.281	0	0	0	0	GO:0048046,apoplast; GO:0005618,cell wall; GO:0009044,xylan 1,4-beta-xylosidase activity; GO:0009627,systemic acquired resistance; GO:0045493,xylan catabolic process	K15920: XYL4; xylan 1,4-beta-xylosidase [EC:3.2.1.37]	At5g64570	gb|POE56857.1|	BXL4_ARATH, RecName: Full=Beta-D-xylosidase 4; Short=AtBXL4; EC=3.2.1.37; Flags: Precursor;	A0A1D1XGR5_9ARAE, SubName: Full=Putative beta-D-xylosidase 2 {ECO:0000313|EMBL:JAT41587.1}; Flags: Fragment;
TRINITY_DN101598_c0_g2	0	1.183	0	0	0	0	--	--	--	--	--	--
TRINITY_DN101599_c0_g1	0.269	0	0	0	0	0	--	--	--	--	--	--
TRINITY_DN101599_c0_g2	0	0	0.653	0	0	0	--	--	--	--	--	--
TRINITY_DN10159_c0_g1	0.119	0	0.15	0	0	0.25	--	--	--	--	--	--
TRINITY_DN1015_c0_g1	0	0.592	0	0	0	0	--	--	--	--	--	--
TRINITY_DN101601_c0_g1	0	0	0	0	0	0	--	--	--	--	--	--
TRINITY_DN101602_c0_g1	0	0.331	0	0	0	0	--	--	--	gb|POF13693.1|	--	K3X1G0_PYTUL, SubName: Full=Uncharacterized protein {ECO:0000313|EnsemblProtists:PYU1_T011059};
TRINITY_DN101603_c0_g1	0.378	0	0	0	0	0	--	--	At5g11600	ref|XP_020098940.1|	--	A0A199UD94_ANACO, SubName: Full=Uncharacterized protein {ECO:0000313|EMBL:OAY62709.1};
TRINITY_DN101605_c0_g1	0	1.033	0	0	0.29	0	--	--	--	--	--	--
TRINITY_DN101606_c0_g1	0.288	0	0	0	0	0	GO:0031428,box C/D snoRNP complex; GO:0016020,membrane; GO:0005730,nucleolus; GO:0032040,small-subunit processome; GO:0030515,snoRNA binding; GO:0000154,rRNA modification	K14564: NOP56; nucleolar protein 56	At3g12860	emb|CBI15634.3|	NOP5B_ARATH, RecName: Full=Probable nucleolar protein 5-2; AltName: Full=MAR-binding NOP56/58 homolog 2; AltName: Full=Nucleolar protein 58-2;	F6GST1_VITVI, SubName: Full=Uncharacterized protein {ECO:0000313|EMBL:CCB43316.1};
TRINITY_DN101606_c1_g1	0.318	0	0	0	0	0	--	--	--	--	--	--
TRINITY_DN101607_c0_g1	0	0	1.692	0	0	0	--	--	--	--	--	--
TRINITY_DN101607_c1_g1	0	0	0	0	0	3.036	--	--	--	--	--	--
TRINITY_DN101609_c0_g1	0.149	0.12	0.054	0.057	0.041	0.038	GO:0043231,intracellular membrane-bounded organelle; GO:0004519,endonuclease activity; GO:0003723,RNA binding; GO:0008270,zinc ion binding; GO:0016556,mRNA modification; GO:0009451,RNA modification	--	At5g09950	ref|XP_003569289.1|	PP373_ARATH, RecName: Full=Putative pentatricopeptide repeat-containing protein At5g09950;	I1HP05_BRADI, SubName: Full=Uncharacterized protein {ECO:0000313|EMBL:KQK08519.1, ECO:0000313|EnsemblPlants:BRADI2G42310.1};
TRINITY_DN101610_c0_g1	0	0	0	0	0	0	--	--	--	--	--	--
TRINITY_DN101611_c0_g1	0	0	0	0	0.383	0	--	--	--	--	--	--
TRINITY_DN101612_c0_g1	0.07	0.211	0	0.33	0.103	0	--	--	--	--	--	--
TRINITY_DN101613_c0_g1	0	0	0	0	0	0	--	--	--	--	--	--
TRINITY_DN101614_c0_g1	0.358	0	0	0	0	0	--	K18164: NDUFAF7; NADH dehydrogenase [ubiquinone] 1 alpha subcomplex assembly factor 7	At3g28700	gb|OAY64531.1|	--	A0A199UIJ9_ANACO, RecName: Full=Protein arginine methyltransferase NDUFAF7 {ECO:0000256|RuleBase:RU364114}; EC=2.1.1.320 {ECO:0000256|RuleBase:RU364114};
TRINITY_DN101616_c0_g1	0	0	0	0	0	0.067	GO:0005737,cytoplasm; GO:0005634,nucleus; GO:0005524,ATP binding; GO:0004672,protein kinase activity; GO:0004674,protein serine/threonine kinase activity; GO:0005975,carbohydrate metabolic process; GO:0006633,fatty acid biosynthetic process; GO:0035556,intracellular signal transduction; GO:0042128,nitrate assimilation; GO:0046777,protein autophosphorylation; GO:0006468,protein phosphorylation; GO…	K07198: PRKAA, AMPK; 5'-AMP-activated protein kinase, catalytic alpha subunit [EC:2.7.11.11]	SPBC19C2.05	gb|POF03991.1|	KIN11_ARATH, RecName: Full=SNF1-related protein kinase catalytic subunit alpha KIN11; Short=AKIN11; EC=2.7.11.1; AltName: Full=AKIN alpha-1; Short=AKINalpha1;	A0A1V9Z6T2_9STRA, SubName: Full=CBL-interacting serine/threonine-protein kinase {ECO:0000313|EMBL:OQR93550.1};
TRINITY_DN101619_c0_g1	0	0.211	0	0.283	0	0	--	--	--	--	--	--
TRINITY_DN101619_c0_g2	0	0.191	0.557	0	0.207	0	--	--	--	--	--	--
TRINITY_DN10161_c0_g1	0.408	0	0	0	0	0	GO:0005524,ATP binding; GO:0004674,protein serine/threonine kinase activity; GO:0004842,ubiquitin-protein transferase activity	K04733: IRAK4; interleukin-1 receptor-associated kinase 4 [EC:2.7.11.1]	At2g45910	gb|EEF50536.1|	PUB33_ARATH, RecName: Full=U-box domain-containing protein 33; AltName: Full=Plant U-box protein 33; Includes: RecName: Full=E3 ubiquitin ligase; EC=2.3.2.27; AltName: Full=RING-type E3 ubiquitin transferase {ECO:0000305}; Includes: RecName: Full=Serine/threonine-protein kinase; EC=2.7.11.-;	B9RDS8_RICCO, SubName: Full=Receptor protein kinase, putative {ECO:0000313|EMBL:EEF50536.1};
TRINITY_DN101620_c0_g1	0	0	0	2.102	0	0	--	--	--	--	--	--
TRINITY_DN101621_c0_g1	0.766	0	0	0	0	0	--	K18730: GIGYF; PERQ amino acid-rich with GYF domain-containing protein	At1g27430	ref|XP_009396780.1|	--	M0SPB1_MUSAM, SubName: Full=Uncharacterized protein {ECO:0000313|EnsemblPlants:GSMUA_Achr4P15970_001};
TRINITY_DN101622_c0_g1	0.637	0	0	0	0	0	--	K17428: MRPL47, NCM1; large subunit ribosomal protein L47	At1g07830	ref|NP_001238505.1|	--	A0A0B2REP6_GLYSO, SubName: Full=39S ribosomal protein L47, mitochondrial {ECO:0000313|EMBL:KHN30824.1};
TRINITY_DN101623_c0_g1	0.796	0	0	0	0	0	GO:0005829,cytosol; GO:0003989,acetyl-CoA carboxylase activity; GO:0005524,ATP binding; GO:0004075,biotin carboxylase activity; GO:0046872,metal ion binding; GO:0006633,fatty acid biosynthetic process; GO:2001295,malonyl-CoA biosynthetic process	K11262: ACACA; acetyl-CoA carboxylase / biotin carboxylase 1 [EC:6.4.1.2 6.3.4.14 2.1.3.15]	At1g36160	ref|XP_010916915.1|	ACC1_ORYSJ, RecName: Full=Acetyl-CoA carboxylase 1; EC=6.4.1.2; Includes: RecName: Full=Biotin carboxylase; EC=6.3.4.14;	A0A2H3YTQ2_PHODC, SubName: Full=acetyl-CoA carboxylase 1-like {ECO:0000313|RefSeq:XP_008803739.1, ECO:0000313|RefSeq:XP_008803740.1, ECO:0000313|RefSeq:XP_008803741.1};
TRINITY_DN101624_c0_g1	0	0	0	0	0	0	--	--	--	--	--	--
TRINITY_DN101625_c0_g1	0	0.16	0	0.141	0	0	--	--	--	--	--	--
TRINITY_DN101626_c0_g1	0.607	0	0	0	0	0	--	--	At1g10280	ref|XP_006659748.1|	--	A0A0A9RZB8_ARUDO, SubName: Full=Uncharacterized protein {ECO:0000313|EMBL:JAF51400.1};
TRINITY_DN101627_c0_g1	1.303	0	0	0	0	0	--	--	--	--	--	--
TRINITY_DN101628_c0_g1	0.298	0.15	0.139	0.132	0	0	--	--	--	--	--	--
TRINITY_DN101629_c0_g1	0.517	0	0	0	0	0	--	--	--	--	--	--
TRINITY_DN101629_c1_g1	1.194	0	0	0	0	0	--	--	--	--	--	--
TRINITY_DN101630_c0_g1	0	0	0	0	0.103	0.576	--	--	--	gb|POE78472.1|	--	A0A1Y1ILR3_KLENI, SubName: Full=Uncharacterized protein {ECO:0000313|EMBL:GAQ90081.1};
TRINITY_DN101631_c0_g1	0	0	0.15	0	0.114	0	--	K00545: COMT; catechol O-methyltransferase [EC:2.1.1.6]	SPBC119.03	gb|POF12685.1|	--	L1IFI1_GUITH, SubName: Full=Uncharacterized protein {ECO:0000313|EMBL:EKX34610.1, ECO:0000313|EnsemblProtists:EKX34610}; Flags: Fragment;
TRINITY_DN101632_c1_g1	0.288	0	0	0	0	0	GO:0071013,catalytic step 2 spliceosome; GO:0080008,Cul4-RING E3 ubiquitin ligase complex; GO:0071011,precatalytic spliceosome; GO:0000974,Prp19 complex; GO:0000398,mRNA splicing, via spliceosome	K12862: PLRG1, PRL1, PRP46; pleiotropic regulator 1	At3g16650	ref|XP_008784744.1|	PRL2_ARATH, RecName: Full=Protein pleiotropic regulator PRL2;	A0A2H3XJH9_PHODC, SubName: Full=protein pleiotropic regulatory locus 1-like {ECO:0000313|RefSeq:XP_008778375.1, ECO:0000313|RefSeq:XP_008784744.1};
TRINITY_DN101633_c0_g1	0	0	0.064	0	0.145	0.307	--	--	--	--	--	--
TRINITY_DN101635_c0_g1	0.09	0.07	0	0	0.165	0.269	--	--	--	--	--	--
TRINITY_DN101636_c0_g1	0	0.913	0	0	0	0	--	--	--	--	--	--
TRINITY_DN101637_c0_g1	0.925	0	0	0	0	0	--	--	At2g25670	ref|XP_020088973.1|	--	C5Z176_SORBI, SubName: Full=Uncharacterized protein {ECO:0000313|EMBL:EES17812.1};
TRINITY_DN10163_c0_g1	5.153	0	0	0	0	0	--	--	--	--	--	--
TRINITY_DN101641_c0_g1	0	0.04	0	0.113	0.124	0.173	--	--	--	--	--	--
TRINITY_DN101643_c0_g1	0	0	0	0	0.786	0	--	--	--	--	--	--
TRINITY_DN101643_c1_g1	0	0.562	0.278	0	0.403	0	--	--	--	--	--	--
TRINITY_DN101644_c1_g1	0	0	0	0.707	0	0	--	--	--	--	--	--
TRINITY_DN101645_c0_g1	0.06	0.05	0	0.141	0.227	0.125	--	--	--	--	--	--
TRINITY_DN101646_c0_g1	0.04	0.17	0.086	0.17	0.031	0	--	--	--	--	--	--
TRINITY_DN101646_c1_g1	0	0.15	0.139	0	0.041	0	--	--	--	--	--	--
TRINITY_DN101648_c0_g1	0.08	0.01	0.075	0.085	0.145	0.106	GO:0005769,early endosome; GO:0016021,integral component of membrane; GO:0016020,membrane; GO:0005886,plasma membrane; GO:0015095,magnesium ion transmembrane transporter activity; GO:0015693,magnesium ion transport	K22733: NIPA, SLC57A2S; magnesium transporter	At1g34470	ref|XP_021749099.1|	NIPA2_ARATH, RecName: Full=Probable magnesium transporter NIPA2;	A0A0J8CS91_BETVU, RecName: Full=Probable magnesium transporter {ECO:0000256|RuleBase:RU363078};
TRINITY_DN101649_c0_g1	0	0	0	0	0.227	0.096	GO:0009507,chloroplast; GO:0005829,cytosol; GO:0004655,porphobilinogen synthase activity; GO:0008270,zinc ion binding; GO:0015995,chlorophyll biosynthetic process; GO:0006783,heme biosynthetic process; GO:0006782,protoporphyrinogen IX biosynthetic process	K01698: hemB, ALAD; porphobilinogen synthase [EC:4.2.1.24]	YGL040c	gb|POE82247.1|	HEM2_PHYPA, RecName: Full=Delta-aminolevulinic acid dehydratase, chloroplastic; Short=ALADH; EC=4.2.1.24; AltName: Full=Porphobilinogen synthase; Flags: Precursor;	A0A1L3A3J4_9EUGL, RecName: Full=Delta-aminolevulinic acid dehydratase {ECO:0000256|RuleBase:RU000515}; EC=4.2.1.24 {ECO:0000256|RuleBase:RU000515}; Flags: Fragment;
TRINITY_DN101650_c0_g1	0	0.13	0.15	0.358	0.083	0.154	--	--	--	--	--	--
TRINITY_DN101650_c1_g1	0	0	0	0	0	0	--	--	--	--	--	--
TRINITY_DN101651_c0_g1	0.09	0.14	0	0.104	0	0	--	--	--	--	--	--
TRINITY_DN101651_c0_g2	0	0	0.546	0	1.148	0	--	--	--	--	--	--
TRINITY_DN101652_c0_g1	0	0.03	0	0.123	0	0.086	--	--	--	--	--	--
TRINITY_DN101653_c0_g1	0.438	0.622	0	0.198	0.269	0.077	--	--	--	--	--	--
TRINITY_DN101654_c0_g1	0	0.241	0.129	0.113	0	0.413	--	--	--	gb|POE72312.1|	--	--
TRINITY_DN101655_c0_g1	0.308	0.13	0	0.179	0	0	--	--	CE14390	gb|POF17601.1|	--	I0YWV6_COCSC, SubName: Full=Epocide hydrolase domain-containing protein {ECO:0000313|EMBL:EIE22875.1};
TRINITY_DN101656_c0_g1	0	0	0	0	0.496	0	--	--	--	--	--	--
TRINITY_DN101659_c0_g1	0.219	0.371	0	0	0	0	GO:0005634,nucleus; GO:0003677,DNA binding; GO:0003700,DNA binding transcription factor activity; GO:0009873,ethylene-activated signaling pathway; GO:0008610,lipid biosynthetic process; GO:0006629,lipid metabolic process; GO:0007275,multicellular organism development; GO:1901959,positive regulation of cutin biosynthetic process; GO:0006109,regulation of carbohydrate metabolic process; GO:0006110,…	K09285: OVM, ANT; AP2-like factor, ANT lineage	At1g79700	dbj|BAJ86627.1|	WRI1_ARATH, RecName: Full=Ethylene-responsive transcription factor WRI1; AltName: Full=Protein ACTIVATOR OF SPORAMIN::LUC 1; AltName: Full=Protein WRINKLED 1;	A0A1D5YN59_WHEAT, SubName: Full=Uncharacterized protein {ECO:0000313|EnsemblPlants:TRIAE_CS42_5AL_TGACv1_376679_AA1239850.1};
TRINITY_DN101660_c0_g1	0	0	1.157	0	0	0	--	--	--	--	--	--
TRINITY_DN101661_c0_g1	0	0	0.054	0	0.321	0	GO:0080008,Cul4-RING E3 ubiquitin ligase complex; GO:0005778,peroxisomal membrane; GO:0006625,protein targeting to peroxisome	K13341: PEX7, PTS2R; peroxin-7	YDR142c	gb|POE77869.1|	PEX7_ARATH, RecName: Full=Peroxisome biogenesis protein 7; AltName: Full=Peroxin-7; Short=AtPEX7; AltName: Full=Peroxisomal targeting signal type 2 receptor; AltName: Full=Pex7p;	I0Z116_COCSC, SubName: Full=WD40 repeat-like protein {ECO:0000313|EMBL:EIE24335.1};
TRINITY_DN101662_c0_g1	0.706	0	0	0	0	0	--	--	--	--	--	--
TRINITY_DN101663_c0_g1	0.637	0	0	0	0	0	GO:0005737,cytoplasm; GO:0005829,cytosol; GO:0005524,ATP binding; GO:0004828,serine-tRNA ligase activity; GO:0046686,response to cadmium ion; GO:0097056,selenocysteinyl-tRNA(Sec) biosynthetic process; GO:0006434,seryl-tRNA aminoacylation	K01875: SARS, serS; seryl-tRNA synthetase [EC:6.1.1.11]	At5g27470	ref|XP_020245694.1|	SYSC_ARATH, RecName: Full=Serine--tRNA ligase, cytoplasmic {ECO:0000305}; EC=6.1.1.11 {ECO:0000305}; AltName: Full=Seryl-tRNA synthetase {ECO:0000305}; Short=SerRS {ECO:0000305}; AltName: Full=Seryl-tRNA(Ser/Sec) synthetase {ECO:0000305};	A0A0A9UPL0_ARUDO, SubName: Full=Uncharacterized protein {ECO:0000313|EMBL:JAF85438.1};
TRINITY_DN101664_c0_g1	0	0	0	0	0	0	--	--	--	--	--	--
TRINITY_DN101665_c0_g1	0.308	0.191	0	0	0.072	0	GO:0016021,integral component of membrane; GO:0005886,plasma membrane; GO:0005524,ATP binding; GO:0004674,protein serine/threonine kinase activity	K04733: IRAK4; interleukin-1 receptor-associated kinase 4 [EC:2.7.11.1]	At2g27060	dbj|BAF11869.1|	Y4294_ARATH, RecName: Full=Probable LRR receptor-like serine/threonine-protein kinase At4g20940; EC=2.7.11.1;	A0A0A9GG81_ARUDO, SubName: Full=Uncharacterized protein {ECO:0000313|EMBL:JAE21556.1};
TRINITY_DN101667_c0_g1	0	0	0	2.271	0	0.788	--	--	--	--	--	--
TRINITY_DN101668_c0_g1	0.706	0	0	0	0	0	--	--	--	--	--	--
TRINITY_DN101668_c0_g2	0.249	0.12	0	0	0.052	0	GO:0005777,peroxisome; GO:0050660,flavin adenine dinucleotide binding; GO:0016627,oxidoreductase activity, acting on the CH-CH group of donors; GO:0033539,fatty acid beta-oxidation using acyl-CoA dehydrogenase; GO:0048767,root hair elongation	K00249: ACADM, acd; acyl-CoA dehydrogenase [EC:1.3.8.7]	At3g06800	gb|POF16770.1|	IBR3_ARATH, RecName: Full=Probable acyl-CoA dehydrogenase IBR3 {ECO:0000305}; EC=1.3.99.- {ECO:0000305}; AltName: Full=Protein INDOLE-3-BUTYRIC ACID RESPONSE 3 {ECO:0000303|PubMed:17277896};	A0A2G5DLD6_AQUCA, SubName: Full=Uncharacterized protein {ECO:0000313|EMBL:PIA44312.1};
TRINITY_DN101668_c0_g3	0.219	0.09	0	0	0.207	0	--	--	--	--	--	--
TRINITY_DN101669_c0_g1	0.338	0	0	0	0	0	GO:0005618,cell wall; GO:0005829,cytosol; GO:0030529,NA; GO:0005730,nucleolus; GO:0005654,nucleoplasm; GO:0003723,RNA binding; GO:0034470,ncRNA processing	K11090: LA, SSB; lupus La protein	At4g32720	gb|OAY81153.1|	LA1_ARATH, RecName: Full=La protein 1; Short=AtLa1;	A0A199VVY1_ANACO, SubName: Full=La protein 1 {ECO:0000313|EMBL:OAY81153.1};
TRINITY_DN101670_c0_g1	0	0	1.232	0	0	0	--	--	--	--	--	--
TRINITY_DN101670_c0_g2	0.149	0	0.064	0.057	0	0.106	--	--	--	--	--	--
TRINITY_DN101671_c0_g1	2.537	0	0	0	0	0	--	--	--	--	--	--
TRINITY_DN101672_c0_g1	0	0.13	0.043	0	0.3	0.163	--	--	--	--	--	--
TRINITY_DN101673_c0_g1	0.259	0	0	0	0.124	0	--	--	--	--	--	J3MY97_ORYBR, SubName: Full=Uncharacterized protein {ECO:0000313|EnsemblPlants:OB09G19760.1};
TRINITY_DN101674_c0_g1	1.025	0	0	0	0	0	--	--	--	--	--	--
TRINITY_DN101675_c0_g1	0.279	0	0	0	0	0	--	K01881: PARS, proS; prolyl-tRNA synthetase [EC:6.1.1.15]	At4g01810	ref|XP_020114166.1|	--	A0A199UZU6_ANACO, SubName: Full=Protein transport protein SEC23 {ECO:0000313|EMBL:OAY70337.1};
TRINITY_DN101676_c0_g1	1.214	0.431	0	0	0	0	--	--	--	--	--	--
TRINITY_DN101677_c0_g1	0.468	0	0.064	0	0.021	0	--	--	--	--	--	--
TRINITY_DN101678_c0_g1	0.647	0.521	0.236	0.396	0.672	0.48	--	--	--	gb|POF18508.1|	--	--
TRINITY_DN101679_c0_g1	0.09	0.211	0	0.047	0	0.077	--	--	--	--	--	--
TRINITY_DN10167_c0_g1	0.209	0.201	0	0	0.041	0	--	K01178: SGA1; glucoamylase [EC:3.2.1.3]	SPBC14C8.05c	gb|POF01366.1|	--	A0A2D4BJ05_PYTIN, SubName: Full=Glycoside hydrolase family 15 carbohydrate-binding module family 21 protein {ECO:0000313|EMBL:GAX94172.1};
TRINITY_DN101680_c0_g1	0	0	0	0	0	0.672	--	--	--	--	--	--
TRINITY_DN101681_c0_g1	0	0.09	0	0	0.165	0.134	--	--	SPAC9G1.11c	gb|POE87454.1|	--	A0A1D1XE65_9ARAE, SubName: Full=Septin spn4 {ECO:0000313|EMBL:JAT40703.1};
TRINITY_DN101683_c0_g1	0	0	0	0	0	2.853	--	--	--	--	--	--
TRINITY_DN101683_c0_g2	0	0	0	0	2.864	0	--	--	--	--	--	--
TRINITY_DN101684_c0_g1	0.597	0	0	0	0	0	--	K18643: KATNB1; katanin p80 WD40 repeat-containing subunit B1	At5g08500	gb|OAY63792.1|	--	A0A199UFZ9_ANACO, SubName: Full=Cleft lip and palate transmembrane protein {ECO:0000313|EMBL:OAY63792.1};
TRINITY_DN101685_c0_g1	0	0.13	0	0	0	0	--	--	--	--	--	--
TRINITY_DN101686_c0_g1	0.328	0	0	0	0	0	GO:0005737,cytoplasm; GO:0005634,nucleus; GO:0006952,defense response	K14508: NPR1; regulatory protein NPR1	At1g64280	ref|XP_010915287.1|	NPR1_ORYSI, RecName: Full=BTB/POZ domain and ankyrin repeat-containing protein NPR1 {ECO:0000305}; Short=OsNPR1 {ECO:0000303|Ref.2}; AltName: Full=NPR1 homolog 1 {ECO:0000305}; Short=OsNH1 {ECO:0000303|PubMed:15986920};	A0A2H3XE84_PHODC, SubName: Full=regulatory protein NPR1 {ECO:0000313|RefSeq:XP_008782513.1};
TRINITY_DN101687_c0_g1	0.647	0	0	0	0	0	--	--	7290726	gb|POE76170.1|	--	R1D9H0_EMIHU, SubName: Full=Uncharacterized protein {ECO:0000313|EMBL:EOD11165.1, ECO:0000313|EnsemblProtists:EOD11165};
TRINITY_DN101688_c0_g1	0.706	0	0	0	0	0	GO:0016021,integral component of membrane; GO:0005886,plasma membrane; GO:0005524,ATP binding; GO:0004674,protein serine/threonine kinase activity; GO:0007166,cell surface receptor signaling pathway; GO:0046777,protein autophosphorylation	K04733: IRAK4; interleukin-1 receptor-associated kinase 4 [EC:2.7.11.1]	At5g38210	ref|XP_020106137.1|	LRL13_ARATH, RecName: Full=LEAF RUST 10 DISEASE-RESISTANCE LOCUS RECEPTOR-LIKE PROTEIN KINASE-like 1.3 {ECO:0000303|PubMed:12805585}; EC=2.7.11.1; AltName: Full=Probable receptor-like serine/threonine-protein kinase LRK10L-1.3 {ECO:0000305}; Flags: Precursor;	A0A199VTV2_ANACO, SubName: Full=Putative serine/threonine-protein kinase {ECO:0000313|EMBL:OAY80356.1};
TRINITY_DN101689_c0_g1	0.507	0	0	0	0	0	--	--	--	--	--	--
TRINITY_DN10168_c0_g1	0	1.464	0	0	0	0	--	--	--	--	--	--
TRINITY_DN101690_c0_g1	0.09	0	0	0	0	0	GO:0000139,Golgi membrane; GO:0016021,integral component of membrane; GO:0016757,transferase activity, transferring glycosyl groups; GO:0071555,cell wall organization; GO:0006486,protein glycosylation	K18789: XGD1; xylogalacturonan beta-1,3-xylosyltransferase [EC:2.4.2.41]	At5g19670	ref|XP_020097692.1|	GLYT3_ARATH, RecName: Full=Probable glycosyltransferase At5g03795; EC=2.4.-.-;	A0A287JUZ8_HORVV, SubName: Full=Uncharacterized protein {ECO:0000313|EnsemblPlants:HORVU3Hr1G000220.4};
TRINITY_DN101692_c0_g1	0	0.03	0	0	0.124	0.134	--	--	--	--	--	--
TRINITY_DN101693_c0_g1	0	0	0	0	0.838	0	--	--	--	--	--	--
TRINITY_DN101694_c0_g1	1.671	0	0	0	0	0	--	--	--	--	--	--
TRINITY_DN101695_c0_g1	0.149	0.08	0	0.057	0.093	0.048	--	--	--	--	--	--
TRINITY_DN101696_c1_g1	0	0	0	0	0.352	0.125	--	--	--	--	--	--
TRINITY_DN101699_c0_g1	0.09	0.1	0	0.047	0.083	0.048	--	--	--	gb|POE71841.1|	--	--
TRINITY_DN10169_c0_g1	0	0	0	0	0	0	--	--	--	--	--	--
TRINITY_DN101700_c0_g1	1.074	0	0.685	0	0.869	0.346	--	--	--	--	--	--
TRINITY_DN101701_c0_g1	0.438	0	0	0	0	0	--	--	--	--	--	--
TRINITY_DN101701_c1_g1	0.318	0	0	0	0	0	--	--	--	--	--	--
TRINITY_DN101702_c0_g1	0.448	0.431	0	0	0	0	--	--	--	--	--	--
TRINITY_DN101703_c0_g1	0.08	0.13	0	0	0	0	--	--	--	--	--	--
TRINITY_DN101703_c0_g2	0	1.725	0	0	0	0	--	--	--	--	--	--
TRINITY_DN101703_c0_g3	0	0.181	0.803	0.245	0.196	0.221	--	--	--	--	--	--
TRINITY_DN101703_c1_g1	0	0.421	0	0.565	0	0.519	--	--	--	--	--	--
TRINITY_DN101706_c0_g1	0.378	0	0	0	0	0	--	--	--	--	--	--
TRINITY_DN101706_c0_g2	1.612	0	0	0	0	0	--	--	--	--	--	--
TRINITY_DN101707_c0_g1	0	0.05	0	0.16	0.186	0.471	--	--	--	--	--	--
TRINITY_DN101707_c0_g2	0	0	0	0	0	0.231	--	--	--	--	--	--
TRINITY_DN101708_c0_g1	0	0.662	0	0	0	0	--	--	--	--	--	--
TRINITY_DN101708_c1_g1	0.05	0.04	0	0.245	0	0.058	GO:0004105,choline-phosphate cytidylyltransferase activity; GO:0006656,phosphatidylcholine biosynthetic process	K00968: PCYT1; choline-phosphate cytidylyltransferase [EC:2.7.7.15]	YGR202c	gb|POF16457.1|	CCT1_ARATH, RecName: Full=Choline-phosphate cytidylyltransferase 1; Short=AtCCT1; EC=2.7.7.15; AltName: Full=CTP:phosphocholine cytidylyltransferase 1; AltName: Full=Phosphorylcholine transferase 1;	A0A1Y1INE6_KLENI, SubName: Full=Choline-Phosphate Cytidylyltransferase {ECO:0000313|EMBL:GAQ90296.1};
TRINITY_DN101709_c0_g1	0.348	0.953	0	0	0	0	--	--	--	--	--	--
TRINITY_DN10170_c0_g1	0	0	0.61	0	0	0	--	--	--	--	--	--
TRINITY_DN10170_c1_g1	0	0	1.863	0	0	0	--	--	--	--	--	--
TRINITY_DN101710_c0_g1	0.298	0	0	0.179	0	0	GO:0012505,endomembrane system; GO:0016021,integral component of membrane; GO:0015299,solute:proton antiporter activity; GO:0015672,monovalent inorganic cation transport; GO:0006813,potassium ion transport; GO:0006885,regulation of pH	--	At3g44900	ref|XP_021734084.1|	CHX4_ARATH, RecName: Full=Cation/H(+) antiporter 4; AltName: Full=Protein CATION/H+ EXCHANGER 4; Short=AtCHX4;	A0A0K9RLM9_SPIOL, SubName: Full=Uncharacterized protein {ECO:0000313|EMBL:KNA20408.1}; Flags: Fragment;
TRINITY_DN101711_c0_g1	0	0	0	0	0	0	--	--	--	--	--	--
TRINITY_DN101712_c0_g1	0.298	0.1	0.043	0	0	0.173	--	--	--	gb|POE49010.1|	--	--
TRINITY_DN101713_c0_g1	0.239	0.11	0	0	0.248	0.096	--	--	--	--	--	--
TRINITY_DN101713_c1_g1	0	0	0	0	0	0	--	--	--	--	--	--
TRINITY_DN101714_c0_g1	0.398	0	0	0	0	0	--	--	--	--	--	--
TRINITY_DN101716_c0_g1	0.477	0	0	0	0	0	GO:0009507,chloroplast; GO:0005524,ATP binding; GO:0016301,kinase activity; GO:0000287,magnesium ion binding; GO:0004749,ribose phosphate diphosphokinase activity; GO:0009116,nucleoside metabolic process; GO:0009165,nucleotide biosynthetic process; GO:0009156,ribonucleoside monophosphate biosynthetic process	K00948: PRPS, prsA; ribose-phosphate pyrophosphokinase [EC:2.7.6.1]	At2g44530	ref|XP_020114522.1|	KPRS1_ORYSJ, RecName: Full=Ribose-phosphate pyrophosphokinase 1, chloroplastic; EC=2.7.6.1; AltName: Full=Phosphoribosyl pyrophosphate synthase 1; Flags: Precursor;	A0A287TE82_HORVV, SubName: Full=Uncharacterized protein {ECO:0000313|EnsemblPlants:HORVU6Hr1G015080.14};
TRINITY_DN101718_c0_g1	0.368	0	0	0	0	0	--	K20293: COG6, COD2; conserved oligomeric Golgi complex subunit 6	At1g31780	gb|ONK78592.1|	--	A0A0D2S1J3_GOSRA, SubName: Full=Uncharacterized protein {ECO:0000313|EMBL:KJB25135.1};
TRINITY_DN101720_c0_g1	0	0	0	0.179	0.145	0.163	--	--	--	--	--	--
TRINITY_DN101721_c0_g1	0	0	0	0.924	0	0	--	--	--	--	--	--
TRINITY_DN101722_c0_g1	0.517	0	0	0	0	0	GO:0005737,cytoplasm; GO:0005635,nuclear envelope; GO:0005730,nucleolus; GO:0005886,plasma membrane; GO:0005524,ATP binding; GO:0004004,ATP-dependent RNA helicase activity; GO:0003723,RNA binding; GO:0016973,poly(A)+ mRNA export from nucleus; GO:0009737,response to abscisic acid; GO:0009409,response to cold; GO:0009408,response to heat; GO:0010501,RNA secondary structure unwinding	K18655: DDX19, DBP5; ATP-dependent RNA helicase DDX19/DBP5 [EC:3.6.4.13]	At3g53110	ref|XP_020082046.1|	RH38_ORYSJ, RecName: Full=DEAD-box ATP-dependent RNA helicase 38; EC=3.6.4.13;	A0A2H3XVU8_PHODC, SubName: Full=DEAD-box ATP-dependent RNA helicase 38 {ECO:0000313|RefSeq:XP_008789457.1};
TRINITY_DN101723_c0_g1	0	0	0.6	0	0.217	0.759	--	--	--	--	--	--
TRINITY_DN101726_c0_g1	0	0	0	0	0	0	--	--	--	--	--	--
TRINITY_DN101727_c0_g1	0	0.13	0.096	0.141	0.072	0.077	--	--	--	--	--	--
TRINITY_DN101729_c0_g1	0	0.261	0	0	0	0.644	--	--	--	--	--	--
TRINITY_DN101730_c0_g1	0	0.792	1.178	0	0.806	0	--	--	--	--	--	--
TRINITY_DN101733_c0_g1	0	0.01	0.043	0.094	0.103	0.25	GO:0009514,glyoxysome; GO:0004474,malate synthase activity; GO:0006097,glyoxylate cycle; GO:0006099,tricarboxylic acid cycle	K01638: aceB, glcB; malate synthase [EC:2.3.3.9]	YNL117w	gb|POE79701.1|	MASY_SOYBN, RecName: Full=Malate synthase, glyoxysomal; Short=MS; EC=2.3.3.9; Flags: Fragment;	A0A1D1XS04_9ARAE, RecName: Full=Malate synthase {ECO:0000256|RuleBase:RU000555}; EC=2.3.3.9 {ECO:0000256|RuleBase:RU000555}; Flags: Fragment;
TRINITY_DN101734_c0_g1	0	0.722	0	0	0.548	0.605	--	--	--	--	--	--
TRINITY_DN101735_c0_g1	0.328	0	0.214	0	0.01	0.346	--	--	--	--	--	--
TRINITY_DN101736_c0_g1	2.079	0	0	0	0	0	--	--	--	--	--	--
TRINITY_DN101738_c0_g1	0.04	0.11	0	0.16	0.093	0.019	GO:0009507,chloroplast; GO:0005829,cytosol; GO:0008184,glycogen phosphorylase activity; GO:0102250,linear malto-oligosaccharide phosphorylase activity; GO:0030170,pyridoxal phosphate binding; GO:0102499,SHG alpha-glucan phosphorylase activity; GO:0005975,carbohydrate metabolic process; GO:0046686,response to cadmium ion; GO:0009414,response to water deprivation	K00688: PYG, glgP; glycogen phosphorylase [EC:2.4.1.1]	YPR160w	gb|POE75108.1|	PHSH_WHEAT, RecName: Full=Alpha-glucan phosphorylase, H isozyme; EC=2.4.1.1; AltName: Full=Starch phosphorylase H;	A0A1D1YCQ3_9ARAE, RecName: Full=Alpha-1,4 glucan phosphorylase {ECO:0000256|RuleBase:RU000587}; EC=2.4.1.1 {ECO:0000256|RuleBase:RU000587};
TRINITY_DN101739_c0_g1	0	0.13	0	0	0	0	--	--	--	gb|PNT67681.1|	--	A0A1D6BF07_WHEAT, SubName: Full=Uncharacterized protein {ECO:0000313|EnsemblPlants:TRIAE_CS42_6DS_TGACv1_543421_AA1739900.1};
TRINITY_DN101740_c0_g1	0	0	0	0	1.768	0	--	--	--	--	--	--
TRINITY_DN101740_c0_g3	0.716	0	0	0	0	0	--	--	--	--	--	--
TRINITY_DN101741_c0_g1	0.149	0.17	0	0	0.124	0	GO:0009507,chloroplast; GO:0009941,chloroplast envelope; GO:0009706,chloroplast inner membrane; GO:0016021,integral component of membrane; GO:0005743,mitochondrial inner membrane; GO:0005739,mitochondrion; GO:0009536,plastid; GO:0006839,mitochondrial transport; GO:0055085,transmembrane transport	K14684: SLC25A23S; solute carrier family 25 (mitochondrial phosphate transporter), member 23/24/25/41	YOR222w	gb|POE54925.1|	BRT1_ARATH, RecName: Full=Adenine nucleotide transporter BT1, chloroplastic/mitochondrial; AltName: Full=Protein BRITTLE 1 homolog; Short=AtBT1; AltName: Full=Protein EMBRYO DEFECTIVE 104; AltName: Full=Protein EMBRYO DEFECTIVE 42; AltName: Full=Protein SODIUM HYPERSENSITIVE 1; Flags: Precursor;	A0A1D1Y7C1_9ARAE, SubName: Full=Mitochondrial 2-oxodicarboxylate carrier 2 {ECO:0000313|EMBL:JAT50544.1};
TRINITY_DN101742_c0_g1	0	1.053	0	0	0	0	--	--	--	--	--	--
TRINITY_DN101742_c0_g2	0.388	0	0	0	0	0	GO:0005737,cytoplasm; GO:0005634,nucleus; GO:0005886,plasma membrane; GO:0005524,ATP binding; GO:0004674,protein serine/threonine kinase activity; GO:0018105,peptidyl-serine phosphorylation; GO:0008360,regulation of cell shape	K02218: CSNK1, CKI; casein kinase 1 [EC:2.7.11.1]	7300125	gb|POE85631.1|	CKL2_ARATH, RecName: Full=Casein kinase 1-like protein 2 {ECO:0000305}; EC=2.7.11.1 {ECO:0000305}; AltName: Full=Protein CASEIN KINASE I-LIKE 2 {ECO:0000303|PubMed:16126836};	R1DNC0_EMIHU, SubName: Full=Uncharacterized protein {ECO:0000313|EMBL:EOD15970.1, ECO:0000313|EnsemblProtists:EOD15970};
TRINITY_DN101743_c0_g1	0.239	0	0	0	0	0	--	--	At3g09580	ref|XP_020093537.1|	--	A0A2H3Z8W3_PHODC, SubName: Full=phytoene dehydrogenase, chloroplastic/chromoplastic {ECO:0000313|RefSeq:XP_008810254.1};
TRINITY_DN101744_c0_g1	0	0	0	0	1.747	0	--	--	--	--	--	--
TRINITY_DN101745_c0_g1	0.099	0	0.182	0.057	0.052	0	--	--	--	--	--	--
TRINITY_DN101746_c0_g1	0	0	0	0	0	0	--	--	--	--	--	--
TRINITY_DN101746_c0_g2	0	0	0.278	0	0	0.48	--	--	--	--	--	--
TRINITY_DN101748_c0_g1	0	0	0	0	0	1.105	--	--	--	--	--	--
TRINITY_DN101749_c0_g1	0	0	0	0	0	0	--	--	--	--	--	--
TRINITY_DN101751_c0_g1	0	0	0	0	0.176	0.202	--	--	--	--	--	--
TRINITY_DN101753_c0_g1	0.348	0	0	0	0	0	GO:0005634,nucleus; GO:0050832,defense response to fungus	--	At3g12140	gb|OVA20872.1|	EML4_ARATH, RecName: Full=Protein EMSY-LIKE 4 {ECO:0000303|PubMed:21830950}; Short=AtEML4 {ECO:0000303|PubMed:21830950};	A0A200RDS7_9MAGN, SubName: Full=EMSY N-terminal {ECO:0000313|EMBL:OVA20872.1};
TRINITY_DN101754_c0_g1	0.398	0	0	0	0	0	--	--	--	--	--	--
TRINITY_DN101755_c0_g1	0.358	0	0	0	0.465	0.365	--	--	--	--	--	--
TRINITY_DN101756_c0_g1	0	0.662	0	0.858	0	0	--	--	--	--	--	--
TRINITY_DN101756_c1_g1	0	0	1.157	0	0	0	--	--	--	--	--	--
TRINITY_DN101757_c0_g1	0	0.732	0	0	0	0.183	--	--	--	--	--	--
TRINITY_DN101758_c0_g1	0	0	0	0.075	0.227	0	GO:0016021,integral component of membrane; GO:0005524,ATP binding; GO:0042626,ATPase activity, coupled to transmembrane movement of substances; GO:0055085,transmembrane transport	--	YGR281w	gb|POE63715.1|	AB4C_MAIZE, RecName: Full=ABC transporter C family MRP4 {ECO:0000305}; EC=3.6.3.- {ECO:0000305}; AltName: Full=Multidrug resistance-associated protein 4 {ECO:0000305}; Short=ZmMRP4 {ECO:0000303|PubMed:17676037}; AltName: Full=Protein LOW PHYTIC ACID 1 {ECO:0000303|PubMed:17676037};	W2LZI6_PHYPR, SubName: Full=Uncharacterized protein {ECO:0000313|EMBL:ETM02065.1};
TRINITY_DN101759_c0_g1	0.139	0	0	0	0	0.144	GO:0005576,extracellular region; GO:0005507,copper ion binding; GO:0008447,L-ascorbate oxidase activity	K05909: E1.10.3.2; laccase [EC:1.10.3.2]	SPAC1F7.08	gb|POF15489.1|	ASO_CUCMA, RecName: Full=L-ascorbate oxidase; Short=ASO; Short=Ascorbase; EC=1.10.3.3; Flags: Precursor;	A0A1D1XYS0_9ARAE, SubName: Full=Iron transport multicopper oxidase fio1 {ECO:0000313|EMBL:JAT47491.1}; Flags: Fragment;
TRINITY_DN101759_c0_g2	0	0	0	0	1.386	0	--	--	--	--	--	--
TRINITY_DN10175_c0_g1	0	0	0	0	0	0	--	--	--	--	--	--
TRINITY_DN101761_c0_g1	0.179	0.02	0	0.132	0.176	0.134	--	--	--	--	--	--
TRINITY_DN101762_c0_g1	0.259	0	0	0	0	0	--	--	--	--	--	--
TRINITY_DN101763_c0_g1	0.129	0	0	0	0	0	GO:0005783,endoplasmic reticulum; GO:0042742,defense response to bacterium; GO:0006491,N-glycan processing	K08288: PRKCSH; protein kinase C substrate 80K-H	At5g56360	gb|KXG32261.1|	GLU2B_ORYSJ, RecName: Full=Glucosidase 2 subunit beta; AltName: Full=Glucosidase II subunit beta; Flags: Precursor;	A0A1B6Q2V7_SORBI, SubName: Full=Uncharacterized protein {ECO:0000313|EMBL:KXG32261.1};
TRINITY_DN101764_c0_g1	0	0	0	0	0	0	--	--	--	--	--	A0A1J3GHQ2_NOCCA, SubName: Full=Uncharacterized protein {ECO:0000313|EMBL:JAU55711.1};
TRINITY_DN101764_c0_g2	1.114	0	0	0	0	0	--	--	--	--	--	--
TRINITY_DN101765_c0_g1	0	0	0.15	0	0	0	--	--	--	--	--	--
TRINITY_DN101766_c1_g1	0	0.16	0	0.443	0.362	0	--	--	--	--	--	--
TRINITY_DN101767_c0_g1	0	0	0	0	0	0	--	--	--	--	--	--
TRINITY_DN101767_c0_g2	0	0	0	0.537	0	0	--	--	--	--	--	--
TRINITY_DN101768_c0_g1	0	2.156	0	0	0	0	--	--	--	--	--	--
TRINITY_DN101768_c1_g1	0	0.642	0	0	0	0	--	--	--	--	--	--
TRINITY_DN101769_c0_g1	0	0	0	0	0.92	0	--	--	--	--	--	--
TRINITY_DN10176_c0_g1	1.114	0	0	0	0	0	GO:0052689,carboxylic ester hydrolase activity; GO:0016787,hydrolase activity; GO:0009056,catabolic process	--	At2g45610	emb|CBI38813.3|	CXE9_ARATH, RecName: Full=Probable carboxylesterase 9; AltName: Full=AtCXE9; EC=3.1.1.1;	F6I347_VITVI, SubName: Full=Uncharacterized protein {ECO:0000313|EMBL:CCB61364.1};
TRINITY_DN101770_c0_g1	0	0.211	0	0.292	0	0.269	--	--	--	--	--	--
TRINITY_DN101771_c0_g1	0	0	0	0	1.375	1.009	--	--	--	--	--	--
TRINITY_DN101773_c0_g1	0	0	0	0	1.158	0	--	--	--	--	--	--
TRINITY_DN101774_c0_g1	0	0.09	0	0	0.31	0	GO:0005794,Golgi apparatus; GO:0000139,Golgi membrane; GO:0016021,integral component of membrane; GO:0047262,polygalacturonate 4-alpha-galacturonosyltransferase activity; GO:0016757,transferase activity, transferring glycosyl groups; GO:0071555,cell wall organization; GO:0045489,pectin biosynthetic process; GO:0000271,polysaccharide biosynthetic process	K20893: PARVUS, GLZ1, GATL1; probable galacturonosyltransferase-like 1 [EC:2.4.1.-]	At4g02130	ref|XP_021763247.1|	GATL6_ARATH, RecName: Full=Probable galacturonosyltransferase-like 6; EC=2.4.1.-; AltName: Full=Like glycosyl transferase 10;	A0A0K9R0K6_SPIOL, RecName: Full=Hexosyltransferase {ECO:0000256|RuleBase:RU362027}; EC=2.4.1.- {ECO:0000256|RuleBase:RU362027};
TRINITY_DN101775_c0_g1	0	0.13	0	0.047	0.134	0.365	--	--	--	--	--	--
TRINITY_DN101777_c0_g1	1.671	0	0	0	0	0	--	--	--	--	--	--
TRINITY_DN101778_c0_g1	0.149	0	0	0	0	0	--	--	Hs5031831	--	--	--
TRINITY_DN101778_c0_g2	0.517	0	0	0	0	0	--	--	CE27362	--	--	--
TRINITY_DN10177_c0_g1	0.099	0.05	0	0.188	0	0.192	--	--	--	--	--	--
TRINITY_DN101781_c0_g1	0.219	0	0	0	0	0	--	K00604: MTFMT, fmt; methionyl-tRNA formyltransferase [EC:2.1.2.9]	At5g17460	ref|XP_004968088.1|	--	K3XKC0_SETIT, SubName: Full=Uncharacterized protein {ECO:0000313|EMBL:KQL04205.1, ECO:0000313|EnsemblPlants:Si002343m};
TRINITY_DN101782_c0_g1	0	0	0	0	0	0	--	--	--	--	--	--
TRINITY_DN101783_c0_g1	0.318	0	0.418	0.754	1.21	1.057	--	--	--	--	--	--
TRINITY_DN101784_c0_g1	0	0.221	0	0	0	0	--	--	--	--	--	--
TRINITY_DN101786_c0_g1	0	0	0	0.311	0	1.182	--	--	--	--	--	--
TRINITY_DN101787_c0_g1	0	0	0	0	0.848	0	--	--	--	--	--	--
TRINITY_DN101788_c0_g1	0	0.04	0.139	0.226	0.052	0.231	--	--	--	--	--	--
TRINITY_DN10178_c0_g1	0.249	0	0	0	0	0.519	--	--	--	--	--	--
TRINITY_DN101790_c0_g1	0.358	0	4.016	0	4.219	3.602	--	--	--	dbj|BAJ86599.1|	--	A0A287KLI5_HORVV, SubName: Full=Uncharacterized protein {ECO:0000313|EnsemblPlants:HORVU3Hr1G030250.8};
TRINITY_DN101791_c0_g1	0.189	0.08	0.246	0.113	0	0	--	--	--	--	--	--
TRINITY_DN101792_c0_g1	0	0.361	0	0	0	0	--	--	--	--	--	--
TRINITY_DN101792_c1_g1	0	2.377	0	0	0	0	--	--	--	--	--	--
TRINITY_DN101793_c0_g1	0.895	0	0	0	0	0	--	--	--	--	--	--
TRINITY_DN101793_c0_g2	0.428	0	0	0	0	0	GO:0005783,endoplasmic reticulum; GO:0005789,endoplasmic reticulum membrane; GO:0016021,integral component of membrane; GO:0052866,phosphatidylinositol phosphate phosphatase activity	K21797: SAC1, SACM1L; phosphatidylinositol 4-phosphatase [EC:3.1.3.-]	At3g51830	ref|XP_010920828.1|	SAC8_ARATH, RecName: Full=Phosphoinositide phosphatase SAC8; Short=AtSAC8; EC=3.1.3.-; AltName: Full=Protein SUPPRESSOR OF ACTIN 1A; Short=AtSAC1a; AltName: Full=Protein SUPPRESSOR OF ACTIN 8; AltName: Full=Putative transmembrane protein G5p; Short=AtG5; AltName: Full=SAC domain protein 8; AltName: Full=SAC1-like protein AtSAC1a;	A0A2H3Y4J2_PHODC, SubName: Full=phosphoinositide phosphatase SAC8 {ECO:0000313|RefSeq:XP_008793079.1};
TRINITY_DN101794_c0_g1	0	0	0	0	2.182	0	--	--	--	--	--	--
TRINITY_DN101796_c0_g1	0	0	0	0	0	0	--	--	--	--	--	--
TRINITY_DN101797_c0_g1	0	0	0	1.668	0	0	--	--	--	--	--	--
TRINITY_DN101798_c0_g1	0.219	0	0	0	0.414	0	--	--	--	--	--	--
TRINITY_DN101799_c0_g1	0	0.662	0	0	0	0	--	--	--	--	--	--
TRINITY_DN1017_c0_g1	2.517	0	0	0	0	0	--	--	--	--	--	--
TRINITY_DN101801_c0_g1	0	0	0	0	1.127	0	--	--	--	--	--	--
TRINITY_DN101802_c0_g1	0.318	0	0.086	0	0.476	0.134	--	--	--	--	--	--
TRINITY_DN101805_c0_g1	0	0	0.493	0.113	0	0	--	--	--	--	--	--
TRINITY_DN101806_c0_g1	0	0.622	0	0	0	0	--	--	--	--	--	--
TRINITY_DN101808_c0_g1	0.03	0.02	0.032	0.066	0.196	0.173	--	K13690: CMT1; alpha-1,3-mannosyltransferase [EC:2.4.1.-]	--	--	--	--
TRINITY_DN101809_c0_g1	0	0	0	0	0	0	--	--	--	--	--	--
TRINITY_DN10180_c0_g1	0	0.351	0	0	0	0	--	--	--	--	--	--
TRINITY_DN101811_c0_g1	0.826	0	0	0	0	0	--	--	--	--	--	--
TRINITY_DN101811_c0_g2	2.497	0	0	0	0	0	--	--	--	--	--	--
TRINITY_DN101812_c0_g1	0.169	0.291	0	0	0	0.355	--	--	--	--	--	--
TRINITY_DN101813_c0_g1	0	0	0	0	0	3.449	--	--	--	--	--	--
TRINITY_DN101814_c0_g1	0.279	0.12	0	0.123	0.114	0	--	--	--	gb|POF12782.1|	--	--
TRINITY_DN101816_c0_g1	0.587	0	0	0	0	0	--	--	--	--	--	--
TRINITY_DN101818_c0_g1	1.403	0	0	0	0	0	--	--	--	--	--	--
TRINITY_DN101820_c0_g1	0.667	0	0	0	0	0	--	--	--	--	--	--
TRINITY_DN101821_c0_g1	0	1.324	0	0	0	0	--	--	--	--	--	--
TRINITY_DN101822_c0_g1	0	0	0	0	0.569	0	--	--	Hs10092579	--	--	--
TRINITY_DN101823_c0_g1	0.08	0.191	0.096	0	0	0	--	--	--	gb|POE63289.1|	--	K3WW31_PYTUL, SubName: Full=Uncharacterized protein {ECO:0000313|EnsemblProtists:PYU1_T009179};
TRINITY_DN101823_c0_g2	0	0	0	0	1.375	0	--	--	--	--	--	--
TRINITY_DN101825_c0_g1	0.269	0	0	0	0	0	--	--	--	--	--	--
TRINITY_DN101825_c0_g2	0	0	0	0	2.316	0	--	--	--	--	--	--
TRINITY_DN101826_c0_g1	1.791	0	0	0	0	0	--	--	--	--	--	--
TRINITY_DN101827_c0_g1	0	0.181	0.096	0	0.217	0	GO:0046872,metal ion binding; GO:0004722,protein serine/threonine phosphatase activity	K17506: PPM1L, PP2CE; protein phosphatase 1L [EC:3.1.3.16]	At2g40180	ref|XP_020188913.1|	P2C77_ORYSJ, RecName: Full=Probable protein phosphatase 2C 77; Short=OsPP2C77; EC=3.1.3.16;	W5ECJ4_WHEAT, SubName: Full=Uncharacterized protein {ECO:0000313|EnsemblPlants:TRIAE_CS42_4BS_TGACv1_328339_AA1086460.1};
TRINITY_DN101828_c0_g1	2.298	0	0	0	0	0	--	--	--	--	--	--
TRINITY_DN101830_c0_g1	0	0	0	0	0	0	--	--	--	--	--	--
TRINITY_DN101833_c0_g1	0.577	0	0	0	0	0	--	--	--	--	--	--
TRINITY_DN101833_c1_g1	0	3.229	0	0	0	0	--	--	--	--	--	--
TRINITY_DN101835_c0_g1	0	0	0	0	0	2.181	--	--	--	--	--	--
TRINITY_DN101836_c0_g1	0	0	0.171	0	0	0	GO:0016567,protein ubiquitination	--	At5g03250	gb|OEL21996.1|	Y5325_ARATH, RecName: Full=BTB/POZ domain-containing protein At5g03250;	A0A1E5VA17_9POAL, SubName: Full=BTB/POZ domain-containing protein {ECO:0000313|EMBL:OEL21996.1};
TRINITY_DN101836_c1_g1	0	0.461	0.9	0.16	0.393	0.288	GO:0016567,protein ubiquitination	--	At5g03250	ref|XP_015690131.1|	Y5325_ARATH, RecName: Full=BTB/POZ domain-containing protein At5g03250;	A0A1E5VA17_9POAL, SubName: Full=BTB/POZ domain-containing protein {ECO:0000313|EMBL:OEL21996.1};
TRINITY_DN101838_c0_g1	0	0.311	0	0.99	0.393	0.365	--	--	--	--	--	--
TRINITY_DN101839_c0_g1	0.279	0	0	0	0	0	--	--	--	--	--	--
TRINITY_DN101843_c0_g1	0	0	0	0	0.372	0	--	--	--	--	--	--
TRINITY_DN101844_c0_g1	0	0.15	0	1.046	0	0.192	GO:0031429,box H/ACA snoRNP complex; GO:0005829,cytosol; GO:0005730,nucleolus; GO:0009506,plasmodesma; GO:0009982,pseudouridine synthase activity; GO:0003723,RNA binding; GO:0000495,box H/ACA snoRNA 3'-end processing; GO:1990481,mRNA pseudouridine synthesis; GO:0031118,rRNA pseudouridine synthesis; GO:0031120,snRNA pseudouridine synthesis	--	YLR175w	gb|POE56622.1|	CBF5_ARATH, RecName: Full=H/ACA ribonucleoprotein complex subunit 4; EC=5.4.99.-; AltName: Full=CBF5 homolog; AltName: Full=Dyskerin; AltName: Full=Nopp-140-associated protein of 57 kDa homolog; Short=AtNAP57; AltName: Full=Nucleolar protein NAP57 homolog;	A0A1X6P4W7_PORUM, SubName: Full=Uncharacterized protein {ECO:0000313|EMBL:OSX75888.1};
TRINITY_DN101845_c0_g1	0	0	0	0	0.269	0	--	--	--	--	--	--
TRINITY_DN101845_c1_g1	0	0	0	2.205	0	0	--	--	--	--	--	--
TRINITY_DN101846_c0_g1	0	0	0	0	0	0	--	--	--	--	--	--
TRINITY_DN101850_c0_g1	0	0	0	0.113	0	0.048	--	--	--	--	--	--
TRINITY_DN101851_c0_g1	0	0	1.403	0	0	5.168	--	--	--	--	--	--
TRINITY_DN101852_c0_g1	0	0.572	0	0	0	0	--	--	--	--	--	--
TRINITY_DN101854_c0_g1	0.378	0	0	0	0	0	--	K09580: PDIA1, P4HB; protein disulfide-isomerase A1 [EC:5.3.4.1]	SPAC1F5.02	gb|POE93229.1|	--	A0A1D1YTJ0_9ARAE, RecName: Full=Protein disulfide-isomerase {ECO:0000256|RuleBase:RU361130}; EC=5.3.4.1 {ECO:0000256|RuleBase:RU361130}; Flags: Fragment;
TRINITY_DN101854_c1_g1	3.78	0	0	0	0	0	--	--	--	--	--	--
TRINITY_DN101855_c0_g1	0	0	0	0	0	0	--	--	--	--	--	--
TRINITY_DN101855_c1_g1	0.199	0	0	0	0	0	GO:0016593,Cdc73/Paf1 complex; GO:0080008,Cul4-RING E3 ubiquitin ligase complex; GO:0005829,cytosol; GO:0005634,nucleus; GO:0009908,flower development; GO:0010452,histone H3-K36 methylation; GO:0051568,histone H3-K4 methylation; GO:0009910,negative regulation of flower development; GO:0016441,posttranscriptional gene silencing; GO:0006355,regulation of transcription, DNA-templated; GO:0006351,tra…	K12602: WDR61, REC14, SKI8; WD repeat-containing protein 61	Hs13376840	dbj|BAK04016.1|	VIP3_ARATH, RecName: Full=WD repeat-containing protein VIP3 {ECO:0000305}; AltName: Full=Protein BOUQUET-1 {ECO:0000303|PubMed:23134555}; Short=boq-1 {ECO:0000303|PubMed:23134555}; AltName: Full=Protein SKI8 homolog {ECO:0000303|PubMed:16716192}; AltName: Full=Protein VERNALIZATION INDEPENDENCE 3 {ECO:0000303|PubMed:12750345}; AltName: Full=Protein ZWERGERL {ECO:0000303|PubMed:22511887}; Short=zw…	F2E9J4_HORVV, SubName: Full=Predicted protein {ECO:0000313|EMBL:BAK04016.1};
TRINITY_DN101857_c0_g1	0	0	0	0	0	1.23	--	--	--	--	--	--
TRINITY_DN101858_c0_g1	0.259	0.923	0	0.613	0	0	--	--	--	--	--	--
TRINITY_DN101859_c0_g1	0	0	0	0	1.344	0	--	--	--	--	--	--
TRINITY_DN101860_c0_g1	0	1.344	0	0	0	0	--	--	--	--	--	--
TRINITY_DN101863_c0_g1	0	0	0	0	0	2.853	--	--	--	--	--	--
TRINITY_DN101864_c0_g1	0	0	0	0	0	0	--	--	--	--	--	--
TRINITY_DN101864_c1_g1	0	0	0	0	0.465	0	--	--	--	--	--	--
TRINITY_DN101865_c0_g1	0.219	0	0.193	0	0	0	--	--	--	--	--	--
TRINITY_DN101868_c0_g1	0.149	0	0.064	0	0	0	GO:0009507,chloroplast; GO:0009570,chloroplast stroma; GO:0005829,cytosol; GO:0009514,glyoxysome; GO:0003987,acetate-CoA ligase activity; GO:0016208,AMP binding; GO:0005524,ATP binding; GO:0006083,acetate metabolic process; GO:0019427,acetyl-CoA biosynthetic process from acetate; GO:0006631,fatty acid metabolic process	--	Hs21269872	gb|OTG20878.1|	ACS_ARATH, RecName: Full=Acetyl-coenzyme A synthetase, chloroplastic/glyoxysomal; EC=6.2.1.1; AltName: Full=Acetate--CoA ligase; AltName: Full=Acetyl-CoA synthetase; Flags: Precursor;	A0A251UC02_HELAN, SubName: Full=Putative AMP-dependent synthetase/ligase, Acetyl-coenzyme A synthetase domain protein {ECO:0000313|EMBL:OTG20878.1};
TRINITY_DN101869_c0_g1	0	0.12	0	0.066	0	0	GO:0005739,mitochondrion; GO:0005507,copper ion binding; GO:0004491,methylmalonate-semialdehyde dehydrogenase (acylating) activity; GO:0006979,response to oxidative stress	K00140: mmsA, iolA, ALDH6A1; malonate-semialdehyde dehydrogenase (acetylating) / methylmalonate-semialdehyde dehydrogenase [EC:1.2.1.18 1.2.1.27]	7290043	gb|POF16769.1|	MMSA_ARATH, RecName: Full=Methylmalonate-semialdehyde dehydrogenase [acylating], mitochondrial; Short=MM-ALDH; Short=MMSDH; Short=Malonate-semialdehyde dehydrogenase [acylating]; EC=1.2.1.27; AltName: Full=Aldehyde dehydrogenase family 6 member B2; Flags: Precursor;	A0A0C9S761_9SPER, SubName: Full=TSA: Wollemia nobilis Ref_Wollemi_Transcript_9641_2193 transcribed RNA sequence {ECO:0000313|EMBL:JAG88182.1};
TRINITY_DN10186_c0_g1	0	0	0	0	0.962	0	--	--	--	--	--	--
TRINITY_DN10186_c0_g2	0	0.552	0	0	0.6	0	--	--	--	--	--	--
TRINITY_DN101870_c0_g1	0	0	0	0	0.083	0.336	--	--	--	--	--	--
TRINITY_DN101871_c0_g1	0.308	0	0	0	0.362	0.163	--	--	SPAC17A2.04c	gb|POE93471.1|	--	A0A1U8ED53_CAPAN, SubName: Full=tetratricopeptide repeat protein 4 homolog {ECO:0000313|RefSeq:XP_016541794.1};
TRINITY_DN101875_c0_g1	0	0.331	0	0	0	0.817	--	--	--	--	--	--
TRINITY_DN101877_c0_g1	0	0.251	0.193	0.264	0	0	--	--	--	--	--	--
TRINITY_DN101877_c0_g2	0	0	0	0.905	0	0	--	--	--	--	--	--
TRINITY_DN101879_c0_g1	0	0	0	0	0.072	0	--	--	--	--	--	--
TRINITY_DN10187_c0_g1	2.447	0	0	0	0	0	--	--	--	--	--	--
TRINITY_DN101880_c0_g1	0.696	0	0	0	0	0	--	--	--	--	--	--
TRINITY_DN101881_c0_g1	0	0	0	0.773	0	0.355	--	K00344: qor, CRYZ; NADPH2:quinone reductase [EC:1.6.5.5]	Hs4758912	gb|POE93529.1|	--	I0Z0N6_COCSC, SubName: Full=NAD(P)-binding protein {ECO:0000313|EMBL:EIE24205.1};
TRINITY_DN101883_c0_g1	0	4.483	0	2.007	0	0	--	--	--	--	--	--
TRINITY_DN101884_c0_g1	0	0	0	0	0	0	--	--	--	--	--	--
TRINITY_DN101885_c0_g1	0	0.632	0	0	0	0	--	--	--	--	--	--
TRINITY_DN101886_c0_g1	0	0.481	0	0	0	0	--	--	--	--	--	--
TRINITY_DN101886_c1_g1	1.035	0	0	0	0	0	--	--	--	--	--	--
TRINITY_DN101887_c0_g1	0	0.281	0.407	0	0	0	--	--	--	--	--	--
TRINITY_DN101888_c0_g1	0.388	0	0	0	0	0	--	--	--	--	--	--
TRINITY_DN101889_c0_g1	0	0	0	0	0	0	--	--	--	--	--	--
TRINITY_DN101889_c1_g1	0.517	0	0	0	0	0	--	--	--	--	--	--
TRINITY_DN10188_c0_g1	0	0	0	1.715	0	0	--	--	--	--	--	--
TRINITY_DN101890_c0_g1	0	0.622	0	0	0	0	--	--	--	--	--	--
TRINITY_DN101891_c1_g1	1.174	0	0	0	0	0	--	--	--	--	--	--
TRINITY_DN101892_c0_g1	0.885	0	0	0	0	0	--	--	--	--	--	--
TRINITY_DN101894_c0_g1	0	0.11	0.171	0	0.062	0	--	--	--	--	--	--
TRINITY_DN101894_c1_g1	0	0	0	1.159	0	0	--	--	--	--	--	--
TRINITY_DN101896_c0_g1	0.836	0	0	0	0	0	--	--	--	--	--	--
TRINITY_DN101897_c1_g1	0	0	0	0	0.651	0	--	--	--	--	--	--
TRINITY_DN101898_c0_g1	0	0.451	0.225	0	0	0	GO:0005737,cytoplasm; GO:0005829,cytosol; GO:0000932,P-body; GO:0005886,plasma membrane; GO:0009506,plasmodesma; GO:0005524,ATP binding; GO:0003677,DNA binding; GO:0004386,helicase activity; GO:0003729,mRNA binding; GO:0008270,zinc ion binding; GO:0042742,defense response to bacterium; GO:0009867,jasmonic acid mediated signaling pathway; GO:0048571,long-day photoperiodism; GO:0000184,nuclear-tran…	K14326: UPF1, RENT1; regulator of nonsense transcripts 1 [EC:3.6.4.-]	7292718	dbj|GAQ80000.1|	RENT1_ARATH, RecName: Full=Regulator of nonsense transcripts 1 homolog; EC=3.6.4.-; AltName: Full=ATP-dependent helicase UPF1;	A0A1Y1HMY9_KLENI, SubName: Full=Regulator of nonsense transcripts 1 {ECO:0000313|EMBL:GAQ80000.1};
TRINITY_DN101899_c0_g1	0	0	0	2.526	2.926	0	--	--	--	--	--	--
TRINITY_DN10189_c0_g1	4.278	0	0	1.706	0	0	--	--	--	--	--	--
TRINITY_DN101900_c0_g1	0	0	0	0	0	0	--	--	--	--	--	--
TRINITY_DN101900_c0_g2	0.557	0	0.471	0	0	0	--	--	--	--	--	--
TRINITY_DN101902_c0_g1	0	0	0	0.924	0	0	--	--	--	--	--	--
TRINITY_DN101902_c0_g2	0	0	0	0	0	1.739	--	--	--	--	--	--
TRINITY_DN101904_c0_g1	0.448	0	0	0	0	0	--	--	--	--	--	--
TRINITY_DN101905_c0_g1	0.269	0	0	0.641	0	0	--	--	--	--	--	--
TRINITY_DN101906_c0_g1	0	0	1.489	0	0	0	--	--	--	--	--	--
TRINITY_DN101907_c0_g1	0.04	0.07	0.054	0	0	0	GO:0016491,oxidoreductase activity	K08081: TR1; tropinone reductase I [EC:1.1.1.206]	Hs10047132	gb|POF16437.1|	GRDH_ORYSJ, RecName: Full=Glucose and ribitol dehydrogenase homolog; EC=1.1.1.-;	A0A1D1ZGT9_9ARAE, SubName: Full=Putative oxidoreductase TM_0325 {ECO:0000313|EMBL:JAT66079.1};
TRINITY_DN101907_c0_g2	0.06	0.271	0	0	0.114	0.173	GO:0016491,oxidoreductase activity	K09841: ABA2; xanthoxin dehydrogenase [EC:1.1.1.288]	At3g51680	gb|POF16437.1|	SDR2A_ARATH, RecName: Full=Short-chain dehydrogenase reductase 2a; Short=AtSDR2a; EC=1.1.1.-;	A0A1D1XN96_9ARAE, SubName: Full=3-oxoacyl-[acyl-carrier-protein] reductase FabG {ECO:0000313|EMBL:JAT43837.1};
TRINITY_DN101907_c0_g3	0	0	0	0	0	0	--	--	--	--	--	--
TRINITY_DN101908_c0_g1	0	0	0	0	0	0.663	--	--	--	--	--	--
TRINITY_DN101909_c0_g1	0.607	0	0	0	0	0	--	--	--	--	--	--
TRINITY_DN10190_c0_g1	0	0.11	0	0	0	0.586	GO:0016021,integral component of membrane; GO:0005886,plasma membrane; GO:0005524,ATP binding; GO:0004674,protein serine/threonine kinase activity	K04733: IRAK4; interleukin-1 receptor-associated kinase 4 [EC:2.7.11.1]	At1g17230	ref|XP_003557650.1|	Y1723_ARATH, RecName: Full=Leucine-rich repeat receptor-like serine/threonine-protein kinase At1g17230; EC=2.7.11.1; Flags: Precursor;	I1H430_BRADI, SubName: Full=Uncharacterized protein {ECO:0000313|EnsemblPlants:BRADI1G58460.2};
TRINITY_DN101912_c0_g1	0	0	0	0	0	0	--	--	--	--	--	--
TRINITY_DN101914_c0_g1	0	0	0	0	0.124	0.144	GO:0005737,cytoplasm; GO:0005524,ATP binding; GO:0004674,protein serine/threonine kinase activity; GO:0032147,activation of protein kinase activity; GO:0007346,regulation of mitotic cell cycle; GO:0023014,signal transduction by protein phosphorylation; GO:0031098,stress-activated protein kinase signaling cascade	K20603: MKK2; mitogen-activated protein kinase kinase 2 [EC:2.7.12.2]	SPBC409.07c	gb|POE73093.1|	M2K1A_PHYPA, RecName: Full=Mitogen-activated protein kinase kinase 1a {ECO:0000303|PubMed:27268428}; EC=2.7.12.2 {ECO:0000250|UniProtKB:Q9S7U9}; AltName: Full=MAP kinase kinase 1a {ECO:0000303|PubMed:27268428}; Short=PpMKK1a {ECO:0000303|PubMed:27268428};	A0A1D1XEV5_9ARAE, SubName: Full=Protein kinase wis1 {ECO:0000313|EMBL:JAT40927.1};
TRINITY_DN101914_c0_g2	0	0	0	1.461	0	0	--	--	--	--	--	--
TRINITY_DN101915_c0_g1	0	0.13	0	0	0	0.49	--	--	--	--	--	--
TRINITY_DN101916_c0_g1	0	0	0.118	0	0.217	0.202	--	--	--	--	--	--
TRINITY_DN101917_c0_g1	0	0.662	0	0	0	0	--	--	--	--	--	--
TRINITY_DN101917_c0_g2	0	0	0	0	0	0.336	--	--	--	--	--	--
TRINITY_DN101918_c0_g1	0	2.136	0	0	0	0	--	--	--	--	--	--
TRINITY_DN101918_c1_g1	0	0	0	0	0	0	--	--	--	--	--	--
TRINITY_DN101919_c0_g1	0	0	0	0	3.154	0	--	--	--	--	--	--
TRINITY_DN101920_c0_g1	0	0	0	0	0	0	--	--	--	--	--	--
TRINITY_DN101925_c0_g1	0	0	0	0	0	0	--	--	--	--	--	--
TRINITY_DN101926_c0_g1	0	0.582	0	0	0	0	--	--	--	--	--	--
TRINITY_DN101929_c0_g1	0	0.05	0	0.217	0.176	0.067	GO:0016491,oxidoreductase activity; GO:0007275,multicellular organism development	K00059: fabG; 3-oxoacyl-[acyl-carrier protein] reductase [EC:1.1.1.100]	Hs10047132	gb|POE65722.1|	TS2_MAIZE, RecName: Full=Sex determination protein tasselseed-2;	L1K4Q2_GUITH, SubName: Full=Uncharacterized protein {ECO:0000313|EMBL:EKX55445.1, ECO:0000313|EnsemblProtists:EKX55445};
TRINITY_DN10192_c0_g1	0	0.461	0	0.594	0	1.134	--	--	--	--	--	--
TRINITY_DN101930_c0_g1	0	0	0	0	0	0.97	--	--	--	--	--	--
TRINITY_DN101932_c1_g1	0.05	0.12	0	0.057	0	0.154	--	--	--	gb|POE82431.1|	--	--
TRINITY_DN101933_c0_g1	0.398	0	0	0	0	0	GO:0009507,chloroplast; GO:0004519,endonuclease activity; GO:0019843,rRNA binding; GO:0009793,embryo development ending in seed dormancy; GO:0009553,embryo sac development; GO:0009555,pollen development; GO:0048868,pollen tube development; GO:0009451,RNA modification	K17964: LRPPRC; leucine-rich PPR motif-containing protein, mitochondrial	At3g06430	gb|AFK48661.1|	PP216_ARATH, RecName: Full=Pentatricopeptide repeat-containing protein At3g06430, chloroplastic; AltName: Full=Protein EMBRYO DEFECTIVE 2750; Flags: Precursor;	A0A0A9RFY1_ARUDO, SubName: Full=Uncharacterized protein {ECO:0000313|EMBL:JAF46446.1};
TRINITY_DN101933_c0_g2	0.517	0	0	0	0	0	GO:0009507,chloroplast; GO:0004519,endonuclease activity; GO:0019843,rRNA binding; GO:0009793,embryo development ending in seed dormancy; GO:0009553,embryo sac development; GO:0009555,pollen development; GO:0048868,pollen tube development; GO:0009451,RNA modification	--	At3g06430	gb|AFK48661.1|	PP216_ARATH, RecName: Full=Pentatricopeptide repeat-containing protein At3g06430, chloroplastic; AltName: Full=Protein EMBRYO DEFECTIVE 2750; Flags: Precursor;	I3T819_LOTJA, SubName: Full=Uncharacterized protein {ECO:0000313|EMBL:AFK48661.1};
TRINITY_DN101933_c0_g3	0	0	0	0	0	0	--	--	--	--	--	--
TRINITY_DN101935_c0_g1	0	0	0	0	0	0	--	--	--	--	--	--
TRINITY_DN101937_c0_g1	0.149	0	0	0.339	0.072	0.403	GO:0005739,mitochondrion	K17917: SNX1_2; sorting nexin-1/2	--	gb|AAU43956.1|	M820_ARATH, RecName: Full=Uncharacterized mitochondrial protein AtMg00820; AltName: Full=ORF170;	Q65X82_ORYSJ, SubName: Full=Putative polyprotein {ECO:0000313|EMBL:AAU44069.1};
TRINITY_DN101938_c0_g1	0.219	0.181	0.161	0	0.176	0.528	--	--	--	--	--	--
TRINITY_DN10193_c0_g1	0	0	0	0	0.703	1.748	--	--	--	--	--	--
TRINITY_DN10193_c0_g2	0	0	0	1.904	0	0	--	--	--	--	--	--
TRINITY_DN101940_c0_g1	0.06	0.14	0	0	0	0.115	--	--	--	--	--	--
TRINITY_DN101941_c0_g1	0	0.05	0	0	0.062	0	--	--	--	--	--	--
TRINITY_DN101942_c0_g1	0	0	0	0	0	0	--	--	--	--	--	--
TRINITY_DN101944_c0_g1	0	0.12	0	0	0.29	0	GO:0005576,extracellular region; GO:0020037,heme binding; GO:0046872,metal ion binding; GO:0004601,peroxidase activity; GO:0042744,hydrogen peroxide catabolic process; GO:0006979,response to oxidative stress	K00430: E1.11.1.7; peroxidase [EC:1.11.1.7]	At3g49960	dbj|BAK03977.1|	PER35_ARATH, RecName: Full=Peroxidase 35; Short=Atperox P35; EC=1.11.1.7; AltName: Full=ATP21a; Flags: Precursor;	A0A287T7M8_HORVV, SubName: Full=Uncharacterized protein {ECO:0000313|EnsemblPlants:HORVU6Hr1G005540.3};
TRINITY_DN101944_c0_g2	0	0.12	0	0	0	0	GO:0005576,extracellular region; GO:0020037,heme binding; GO:0046872,metal ion binding; GO:0004601,peroxidase activity; GO:0042744,hydrogen peroxide catabolic process; GO:0006979,response to oxidative stress	K00430: E1.11.1.7; peroxidase [EC:1.11.1.7]	At4g30170	ref|XP_020155203.1|	PER45_ARATH, RecName: Full=Peroxidase 45; Short=Atperox P45; EC=1.11.1.7; AltName: Full=ATP8a; Flags: Precursor;	W5HY39_WHEAT, RecName: Full=Peroxidase {ECO:0000256|RuleBase:RU362060, ECO:0000256|SAAS:SAAS00709852}; EC=1.11.1.7 {ECO:0000256|RuleBase:RU362060, ECO:0000256|SAAS:SAAS00709852};
TRINITY_DN101945_c0_g1	0	0	0.096	0.085	0.072	0.154	--	--	--	--	--	--
TRINITY_DN101949_c0_g1	3.323	0	0	0	0	0	--	--	--	--	--	--
TRINITY_DN101950_c0_g1	0.517	0	0.203	0	0	0	--	--	Hs14149775	--	--	A0A1D1Z6I9_9ARAE, SubName: Full=Magnesium transporter protein 1 {ECO:0000313|EMBL:JAT62501.1};
TRINITY_DN101952_c0_g1	0	0	0	0	0	0	--	--	--	--	--	--
TRINITY_DN101953_c0_g1	0	0	0	0	0	0	--	--	--	--	--	--
TRINITY_DN101955_c0_g1	0	0	1.617	0	0	0	--	--	--	--	--	--
TRINITY_DN101956_c0_g1	0	0	0	0	2.244	0	--	--	--	--	--	--
TRINITY_DN101959_c0_g1	0.219	0	0	0	0	0	--	--	--	--	--	--
TRINITY_DN101961_c0_g1	0	0.953	0	0	0	0	--	--	--	--	--	--
TRINITY_DN101962_c0_g1	0	0	0.161	0	0.476	0.134	--	--	--	--	--	--
TRINITY_DN101963_c0_g1	0	0.281	0	0	0	0	--	--	--	--	--	--
TRINITY_DN101966_c0_g1	0.368	0	0	0	0	0	--	--	--	--	--	--
TRINITY_DN101967_c0_g1	0	0.321	0	0	0.176	0	--	--	--	--	--	--
TRINITY_DN101968_c0_g1	0.676	0	0	0	0	1.566	--	--	--	--	--	--
TRINITY_DN101969_c0_g1	1.303	0	0	0	0	0	--	--	--	--	--	--
TRINITY_DN10196_c0_g1	1.92	0	0	0	0	0	--	--	--	--	--	--
TRINITY_DN101970_c0_g1	0.259	0.231	0	0	0.496	0	--	--	--	--	--	--
TRINITY_DN101972_c0_g1	0	0	0	0	3.133	0.97	--	--	--	--	--	--
TRINITY_DN101975_c0_g1	0	1.454	0	0	0.414	0	--	--	--	--	--	--
TRINITY_DN101976_c0_g1	0.776	0	0	0	0	0	GO:0009570,chloroplast stroma; GO:0009535,chloroplast thylakoid membrane; GO:0005524,ATP binding; GO:0015462,ATPase-coupled protein transmembrane transporter activity; GO:0017038,protein import; GO:0006605,protein targeting	K03070: secA; preprotein translocase subunit SecA	At4g01800	gb|AAB09598.1|	SECA1_ARATH, RecName: Full=Protein translocase subunit SECA1, chloroplastic; Short=AtcpSecA; AltName: Full=Protein ALBINO OR GLASSY YELLOW 1; Flags: Precursor;	O24589_MAIZE, SubName: Full=Cp-SecA {ECO:0000313|EMBL:AAB09598.1}; Flags: Fragment;
TRINITY_DN101977_c0_g1	0	0	0	0	0.724	0	--	--	--	--	--	--
TRINITY_DN101980_c0_g1	0	0	0.118	0.113	0	0.202	--	--	--	--	--	--
TRINITY_DN101980_c0_g2	0	0.07	0.685	0.104	0.093	0	--	--	--	--	--	--
TRINITY_DN101980_c0_g3	0	0	2.495	0	0	0	--	--	--	--	--	--
TRINITY_DN101981_c0_g1	1.89	0	0	0	0	0	--	--	--	--	--	--
TRINITY_DN101982_c0_g1	0.099	0.251	0.257	0.349	0	0.106	--	--	--	--	--	--
TRINITY_DN101983_c0_g1	0.458	0	0	0	0	0	--	K10268: FBXL2_20; F-box and leucine-rich repeat protein 2/20	At4g15470_2	ref|XP_017702124.1|	FBL4_ARATH, RecName: Full=F-box/LRR-repeat protein 4; Short=AtFBL4;	A0A2H4A0H9_PHODC, SubName: Full=F-box/LRR-repeat protein 4 isoform X4 {ECO:0000313|RefSeq:XP_017702124.1};
TRINITY_DN101988_c0_g1	0	0	0	0	0	0	--	--	--	--	--	--
TRINITY_DN10198_c0_g1	0	0.15	0.171	0.217	0.072	0.086	GO:0016021,integral component of membrane; GO:0005345,purine nucleobase transmembrane transporter activity; GO:0005215,transporter activity; GO:0015853,adenine transport; GO:0015854,guanine transport; GO:0006863,purine nucleobase transport	K06901: pbuG; putative MFS transporter, AGZA family, xanthine/uracil permease	SPBC887.17	dbj|BAJ92670.1|	AZG1_ARATH, RecName: Full=Adenine/guanine permease AZG1; AltName: Full=AzgA-homolog protein; AltName: Full=Protein AZAGUANINE RESISTANT 1; Short=AtAzg1;	F2DC49_HORVV, SubName: Full=Predicted protein {ECO:0000313|EMBL:BAJ92670.1};
TRINITY_DN101990_c0_g1	0	0.471	0	0	0	0	GO:0005739,mitochondrion; GO:0004519,endonuclease activity; GO:0003723,RNA binding; GO:0008270,zinc ion binding; GO:0080156,mitochondrial mRNA modification	K13800: CMPK1, UMPK; UMP-CMP kinase [EC:2.7.4.14]	At3g13770	ref|XP_003566841.1|	PP227_ARATH, RecName: Full=Putative pentatricopeptide repeat-containing protein At3g13770, mitochondrial; Flags: Precursor;	I1HP48_BRADI, SubName: Full=Uncharacterized protein {ECO:0000313|EnsemblPlants:BRADI2G42710.1};
TRINITY_DN101991_c0_g1	0	0	0	1.508	0.589	0	--	--	--	--	--	--
TRINITY_DN101992_c0_g1	0.398	0	0	0	0	0	--	--	--	--	--	--
TRINITY_DN101993_c0_g1	0.477	0	0	0	0	0	--	--	--	--	--	--
TRINITY_DN101995_c0_g1	0	0	0	0	0	0	--	--	--	--	--	--
TRINITY_DN101996_c0_g1	0	0	0	0	0	0	--	--	--	--	--	--
TRINITY_DN101996_c0_g2	0	0	0	0	0	0.327	GO:0005739,mitochondrion; GO:0005524,ATP binding; GO:0009927,histidine phosphotransfer kinase activity; GO:0042803,protein homodimerization activity; GO:0004740,pyruvate dehydrogenase (acetyl-transferring) kinase activity; GO:0046777,protein autophosphorylation	K00898: PDK2_3_4; pyruvate dehydrogenase kinase 2/3/4 [EC:2.7.11.2]	At3g06483	gb|POE90608.1|	PDK_ARATH, RecName: Full=[Pyruvate dehydrogenase (acetyl-transferring)] kinase, mitochondrial; Short=AtPDHK; Short=Pyruvate dehydrogenase kinase; EC=2.7.11.2;	A0A1D1Z7Z4_9ARAE, SubName: Full=[Pyruvate dehydrogenase [lipoamide]] kinase, mitochondrial {ECO:0000313|EMBL:JAT63021.1};
TRINITY_DN101997_c0_g1	0.378	0	0	0	0	0	--	--	--	gb|POE75537.1|	--	F2EIW9_HORVV, SubName: Full=Predicted protein {ECO:0000313|EMBL:BAK07291.1};
TRINITY_DN101998_c0_g1	0	0	0	0.066	0.114	0.125	--	--	At5g51880	gb|POF01380.1|	--	K3X5T9_PYTUL, SubName: Full=Uncharacterized protein {ECO:0000313|EnsemblProtists:PYU1_T012588};
TRINITY_DN102002_c0_g1	0.209	0.05	0.107	0	0	0	--	--	--	dbj|GAX76785.1|	--	A0A1D1ZEV8_9ARAE, SubName: Full=Putative polysaccharide deacetylase yheN {ECO:0000313|EMBL:JAT65363.1};
TRINITY_DN102003_c0_g1	1.791	0	0	0	0	0	--	--	--	--	--	--
TRINITY_DN102003_c1_g1	1.064	0	0	0	0	0	--	--	--	--	--	--
TRINITY_DN102005_c0_g1	0	3.299	0	0	0	0	--	--	--	--	--	--
TRINITY_DN102006_c0_g1	0.169	0	0	0	0	0	--	--	--	--	--	--
TRINITY_DN102008_c0_g1	0.229	0	0	3.421	0.982	0	--	--	--	--	--	--
TRINITY_DN102009_c0_g1	0	0	2.42	0	0	0	--	--	--	--	--	--
TRINITY_DN10200_c0_g1	0	0.15	0	0	0	0	GO:0005739,mitochondrion; GO:0005507,copper ion binding; GO:0004491,methylmalonate-semialdehyde dehydrogenase (acylating) activity; GO:0006979,response to oxidative stress	K00140: mmsA, iolA, ALDH6A1; malonate-semialdehyde dehydrogenase (acetylating) / methylmalonate-semialdehyde dehydrogenase [EC:1.2.1.18 1.2.1.27]	Hs11095441	gb|POF16769.1|	MMSA_ARATH, RecName: Full=Methylmalonate-semialdehyde dehydrogenase [acylating], mitochondrial; Short=MM-ALDH; Short=MMSDH; Short=Malonate-semialdehyde dehydrogenase [acylating]; EC=1.2.1.27; AltName: Full=Aldehyde dehydrogenase family 6 member B2; Flags: Precursor;	A0A1V9YQH8_9STRA, SubName: Full=Methylmalonate-semialdehyde dehydrogenase, mitochondrial {ECO:0000313|EMBL:OQR87910.1};
TRINITY_DN102010_c0_g1	0	0.371	0	0	0	0	--	--	--	--	--	--
TRINITY_DN102010_c0_g2	0.169	0	0	0	0	0.173	--	--	--	--	--	--
TRINITY_DN102011_c0_g1	0	0	0	0.075	0.062	0.134	--	--	--	--	--	--
TRINITY_DN102014_c0_g1	0.08	0.241	0	0.094	0	0.096	--	--	--	--	--	--
TRINITY_DN102015_c0_g1	0	0	0	0.754	0.806	0.845	--	--	--	--	--	--
TRINITY_DN102015_c1_g1	1.741	0	0	0	0	0	--	--	--	--	--	--
TRINITY_DN102016_c0_g1	12.932	3.71	6.136	0	0	7.224	--	--	--	--	--	--
TRINITY_DN102019_c0_g1	0	0	0	0.622	0	0	--	--	--	--	--	--
TRINITY_DN102020_c0_g1	0	0	0	0.207	0	0	--	--	--	--	--	--
TRINITY_DN102021_c0_g1	0.716	0	0	0	0	0	--	--	--	--	--	--
TRINITY_DN102022_c0_g1	0	0	0	0	1.251	1.153	--	--	--	--	--	--
TRINITY_DN102023_c0_g1	0	0	1.446	0	0	0	--	--	--	--	--	--
TRINITY_DN102023_c0_g2	0	0	0	0	0	0	--	--	--	--	--	--
TRINITY_DN102024_c1_g1	1.472	0	0	0	0	0	--	--	--	--	--	--
TRINITY_DN102026_c0_g1	0	0	0.525	0	0.196	0	--	--	--	--	--	--
TRINITY_DN102027_c0_g1	0	0	0	0.123	0.207	0.221	GO:0005737,cytoplasm; GO:0003729,mRNA binding; GO:0046719,regulation by virus of viral protein levels in host cell; GO:0009735,response to cytokinin; GO:0008380,RNA splicing	K14944: NOVA; RNA-binding protein Nova	YBR233w	gb|POE96890.1|	BTR1_ARATH, RecName: Full=Protein BTR1 {ECO:0000303|PubMed:18762309}; AltName: Full=Binding to ToMV RNA 1 {ECO:0000303|PubMed:18762309};	A0A1D1ZKD6_9ARAE, SubName: Full=RNA-binding protein rnc1 {ECO:0000313|EMBL:JAT67213.1};
TRINITY_DN102029_c0_g1	0	0	0	0.075	0.165	0.144	--	K14847: RPF2; ribosome production factor 2	SPAC926.08c	gb|POF26135.1|	--	D7FJV0_ECTSI, SubName: Full=Brix domain containing 1 {ECO:0000313|EMBL:CBJ29198.1};
TRINITY_DN10202_c0_g1	0	1.394	0	0	0.703	1.748	--	--	--	--	--	--
TRINITY_DN102030_c1_g1	0	0	0	0.254	0	0.231	--	--	--	--	--	--
TRINITY_DN102031_c0_g1	0	0	0	0	1.489	1.124	--	--	--	--	--	--
TRINITY_DN102032_c0_g1	0	0.662	0	0	0	0	--	--	--	--	--	--
TRINITY_DN102033_c0_g1	0.04	0.17	0	0	0	0	--	--	--	--	--	--
TRINITY_DN102033_c0_g2	2.855	0	0	0	0	0	--	--	--	--	--	--
TRINITY_DN102035_c1_g1	1.85	0	0	0	0	0	--	--	--	--	--	--
TRINITY_DN102036_c0_g1	0	0	0	0	0	3.218	--	--	--	--	--	--
TRINITY_DN102038_c0_g1	0	0	0	0	0	0	--	--	--	--	--	--
TRINITY_DN102039_c0_g1	0	0.802	0	0	0	0.509	--	--	--	--	--	--
TRINITY_DN102041_c0_g1	0	0.652	0	0	0	0	--	--	--	--	--	--
TRINITY_DN102042_c0_g1	1.93	0	0	0	0	0	--	--	--	--	--	--
TRINITY_DN102045_c0_g1	0	0.1	0.407	0	0	0	--	--	--	--	--	--
TRINITY_DN102045_c1_g1	0.209	0	0.878	0	0.403	0	--	--	--	--	--	--
TRINITY_DN102046_c0_g1	0	0.241	0	0.311	0.258	0	--	--	--	--	--	--
TRINITY_DN102047_c0_g1	0.627	0	0	0	0	0	--	--	--	--	--	--
TRINITY_DN102048_c0_g1	0	0	0	0	0	0	--	--	--	--	--	--
TRINITY_DN102049_c0_g1	0.318	0	0	0	0	0	GO:0005524,ATP binding; GO:0001729,ceramide kinase activity; GO:0102773,dihydroceramide kinase activity; GO:0046872,metal ion binding; GO:0003951,NAD+ kinase activity; GO:0006672,ceramide metabolic process; GO:0043069,negative regulation of programmed cell death	K04715: E2.7.1.138, CERK; ceramide kinase [EC:2.7.1.138]	At5g51290	gb|ONK73540.1|	CERK_ORYSJ, RecName: Full=Ceramide kinase; Short=OsCERK; EC=2.7.1.138;	A0A2I0X204_9ASPA, SubName: Full=Sphingosine kinase 1 {ECO:0000313|EMBL:PKU81944.1};
TRINITY_DN102049_c1_g1	0.686	0	0	0	0	0	--	--	--	--	--	--
TRINITY_DN102052_c0_g1	0	0	0	0	0	0	--	--	--	--	--	--
TRINITY_DN102052_c0_g2	0	0.391	0	0.273	0.072	0	--	--	--	--	--	--
TRINITY_DN102053_c0_g1	4.566	0	0	0	0	0	--	--	--	--	--	--
TRINITY_DN102054_c0_g1	0.209	0.17	0	0	0.103	0	--	--	--	--	--	--
TRINITY_DN102054_c0_g2	0	0	0	0	0	0.086	--	--	--	--	--	--
TRINITY_DN102055_c0_g1	0	0	0	0	0	0	--	--	--	--	--	--
TRINITY_DN102058_c0_g1	0	0	1.853	0	0	0	--	--	--	--	--	--
TRINITY_DN102058_c1_g1	0	0	0	1.555	0	0	--	--	--	--	--	--
TRINITY_DN102059_c0_g1	0	0	0	0	0	0	--	--	--	--	--	--
TRINITY_DN102059_c1_g1	0.179	0.05	0.075	0	0.114	0	--	--	--	--	--	--
TRINITY_DN102060_c0_g1	1.144	0	0	0	0	0	--	--	--	--	--	--
TRINITY_DN102061_c0_g1	0	0	0	0	0	3.132	--	--	--	--	--	--
TRINITY_DN102062_c0_g1	0.537	0	0	0	0	0	--	--	--	ref|XP_009421230.1|	--	A0A2H3Y8J7_PHODC, SubName: Full=BAG family molecular chaperone regulator 6-like {ECO:0000313|RefSeq:XP_008795008.1};
TRINITY_DN102062_c0_g2	0	0	0	0	0	0	--	--	--	--	--	--
TRINITY_DN102063_c0_g1	0	0.572	0	0	0	0	--	--	--	--	--	--
TRINITY_DN102064_c0_g1	0.477	0	0	0	0	0	--	--	--	--	--	--
TRINITY_DN102066_c0_g1	0	0	0	0	0	0	--	--	--	--	--	--
TRINITY_DN102067_c0_g1	0	0	0	0	0	2.229	--	--	--	--	--	--
TRINITY_DN102067_c0_g2	0	0.431	0	0.556	0	0	--	--	--	--	--	--
TRINITY_DN102067_c1_g1	0	0	0	0	0	0	--	--	--	--	--	--
TRINITY_DN102068_c0_g1	0	0	0	0	0.62	0.903	--	--	--	--	--	--
TRINITY_DN102069_c0_g1	0	0	0	0.49	0	0	--	--	--	--	--	--
TRINITY_DN10206_c0_g1	0.199	0	0	0	0	0	GO:0005783,endoplasmic reticulum; GO:0016021,integral component of membrane; GO:0005773,vacuole; GO:0008374,O-acyltransferase activity; GO:0046027,phospholipid:diacylglycerol acyltransferase activity; GO:0006071,glycerol metabolic process; GO:0019432,triglyceride biosynthetic process	K00679: E2.3.1.158; phospholipid:diacylglycerol acyltransferase [EC:2.3.1.158]	At5g13640	ref|XP_020090533.1|	PDAT1_ARATH, RecName: Full=Phospholipid:diacylglycerol acyltransferase 1; Short=AtPDAT; EC=2.3.1.158 {ECO:0000250|UniProtKB:O94680};	A0A1D6ER60_MAIZE, SubName: Full=Phospholipid:diacylglycerol acyltransferase 1 {ECO:0000313|EMBL:ONM22212.1};
TRINITY_DN102070_c0_g1	0	0	0	0	0	0	--	--	--	--	--	--
TRINITY_DN102071_c0_g1	0	0	0.386	0.038	0.279	0	--	--	--	--	--	--
TRINITY_DN102072_c0_g1	0	0	0.396	0	0	0	--	--	--	--	--	--
TRINITY_DN102073_c0_g1	0	0	0	0.867	0	0	--	--	--	--	--	--
TRINITY_DN102075_c0_g1	0	0	0	0	0	1.345	--	--	--	--	--	--
TRINITY_DN102075_c1_g1	0	0.913	0	0	0	0	--	--	--	--	--	--
TRINITY_DN102076_c0_g1	0	0	0	0.386	0.31	0	--	--	--	--	--	--
TRINITY_DN102077_c0_g1	0.696	0	0	0	0	0	--	--	--	--	--	--
TRINITY_DN102077_c1_g1	0.895	0	0	0	0	0	GO:0005622,intracellular; GO:0005524,ATP binding; GO:0004674,protein serine/threonine kinase activity; GO:0035556,intracellular signal transduction; GO:0018105,peptidyl-serine phosphorylation; GO:0018107,peptidyl-threonine phosphorylation	K07198: PRKAA, AMPK; 5'-AMP-activated protein kinase, catalytic alpha subunit [EC:2.7.11.11]	At5g58380	ref|XP_020113747.1|	CIPKE_ORYSJ, RecName: Full=CBL-interacting protein kinase 14; EC=2.7.11.1; AltName: Full=OsCIPK14;	A0A1J6I657_NICAT, RecName: Full=Non-specific serine/threonine protein kinase {ECO:0000256|SAAS:SAAS00351747}; EC=2.7.11.1 {ECO:0000256|SAAS:SAAS00351747};
TRINITY_DN102079_c0_g1	0	0	0	1.272	0	0	--	--	--	--	--	--
TRINITY_DN102079_c1_g1	0.497	0	0	0	0.558	0	--	--	--	--	--	--
TRINITY_DN10207_c0_g1	0	0	0	0.415	0	0	--	--	--	--	--	--
TRINITY_DN102081_c0_g1	0	0	0	0	0	1.451	--	--	--	--	--	--
TRINITY_DN102083_c0_g1	0.179	0.261	0	0	0	0.375	--	--	--	--	--	--
TRINITY_DN102083_c1_g1	0	0.491	0	0	0	0	--	--	--	--	--	--
TRINITY_DN10208_c0_g1	0.726	0	0	0	0	0	--	--	--	--	--	--
TRINITY_DN102090_c0_g1	5.69	1.635	1.446	2.724	3.464	2.325	--	--	--	--	--	--
[truncated: 486,299+ more rows]
